# Supplementary material for: CYRI-B-mediated macropinocytosis drives metastasis via lysophosphatidic acid receptor uptake
Source: eLife journal article supplement (doi:10.7554/elife.83712), 2024-05-07
Supplement: fig1-data1 [file Figure 1- source data 1 Excel 1B.xlsx]

## Sheet: Sheet1
	BAJD35.1j	6weeks		In Percentage				BAJD82.2a	15weeks
								Name	Value
	Name	Value						Total Tissue Area (μm²)	49225468
	Total Tissue Area (μm²)	111691544						Total CYRI-B Copies	147612
	Total CYRI-B Copies	354733						Total CYRI-B Area (μm²)	36903
	Total CYRI-B Area (μm²)	88683.2						Avg CYRI-B Optical Density	0.282312
	Avg CYRI-B Optical Density	0.273689						Avg CYRI-B Copies Per μm²	0.002999		0.2999
	Avg CYRI-B Copies Per μm²	0.003176		0.3176
																91.2b
	BAJD14.1a	6weeks						BAJD90.1d								Name	Value
	Name	Value						Name	Value							Classified Area (mm²)	4.16872
	Total Tissue Area (μm²)	97090040						Total Tissue Area (μm²)	198712496							empty Area (mm²)	0.04295
	Total CYRI-B Copies	117320						Total CYRI-B Copies	2214286							Tissue Area (mm²)	4.12576
	Total CYRI-B Area (μm²)	29330						Total CYRI-B Area (μm²)	553572							Total Tissue Area (μm²)	4.12337e+06
	Avg CYRI-B Optical Density	0.274444						Avg CYRI-B Optical Density	0.339922							Total CYRI-B Copies	205647
	Avg CYRI-B Copies Per μm²	0.001208		0.1208				Avg CYRI-B Copies Per μm²	0.011143		1.1143					Total CYRI-B Area (μm²)	51411.8
																Avg CYRI-B Optical Density	0.365054
																Avg CYRI-B Copies Per μm²	0.049874
	BAJD97.1a	6 weeks														Tissue: Total Tissue Area (μm²)	4.12337e+06
	Name	Value						BAJD93.1b	15weeks							Tissue: Total CYRI-B Copies	205647
	Total Tissue Area (μm²)	21488226						Name	Value							Tissue: Total CYRI-B Area (μm²)	51411.8
	Total CYRI-B Copies	160951						Total Tissue Area (μm²)	76320208							Tissue: Avg CYRI-B Optical Density	0.365054
	Total CYRI-B Area (μm²)	40237.8						Total CYRI-B Copies	356347							Tissue: Avg CYRI-B Copies Per μm²	0.049874		4.9874
	Avg CYRI-B Optical Density	0.32087						Total CYRI-B Area (μm²)	89086.8
	Avg CYRI-B Copies Per μm²	0.00749		0.749				Avg CYRI-B Optical Density	0.282158
								Avg CYRI-B Copies Per μm²	0.004669		0.4669
	BAJD91.1d	10weeks						BAJD93.1d	15weeks
	Name	Value						Name	Value
	Total Tissue Area (μm²)	42741064						Total Tissue Area (μm²)	63589240
	Total CYRI-B Copies	167114						Total CYRI-B Copies	430202
	Total CYRI-B Area (μm²)	41778.5						Total CYRI-B Area (μm²)	107550
	Avg CYRI-B Optical Density	0.273639						Avg CYRI-B Optical Density	0.317258
	Avg CYRI-B Copies Per μm²	0.00391		0.391				Avg CYRI-B Copies Per μm²	0.006765		0.6765
								BAJD91.2d	15weeks
	BAJD91.1f	10weeks						Name	Value
	Name	Value						Total Tissue Area (μm²)	63605696
	Total Tissue Area (μm²)	30716098						Total CYRI-B Copies	368032
	Total CYRI-B Copies	29446						Total CYRI-B Area (μm²)	92008
	Total CYRI-B Area (μm²)	7361.5						Avg CYRI-B Optical Density	0.300679
	Avg CYRI-B Optical Density	0.275897						Avg CYRI-B Copies Per μm²	0.005786		0.5786
	Avg CYRI-B Copies Per μm²	0.000959		0.0959
	BAJD92.1b	10weeks						BAJD81.2b	PDAC
	Name	Value						Name	Value
	Total Tissue Area (μm²)	71220968						Total Tissue Area (μm²)	80282440
	Total CYRI-B Copies	420915						Total CYRI-B Copies	4215068
	Total CYRI-B Area (μm²)	105229						Total CYRI-B Area (μm²)	1053767
	Avg CYRI-B Optical Density	0.27241						Avg CYRI-B Optical Density	0.346761
	Avg CYRI-B Copies Per μm²	0.00591		0.591				Avg CYRI-B Copies Per μm²	0.052503		5.2503
	BAJD91.2b	10weeks						BAJD92.2d	PDAC
	Name	Value						Name	Value
	Total Tissue Area (μm²)	51594660						Total Tissue Area (μm²)	19755316
	Total CYRI-B Copies	622604						Total CYRI-B Copies	115645
	Total CYRI-B Area (μm²)	155651						Total CYRI-B Area (μm²)	28911.2
	Avg CYRI-B Optical Density	0.346792						Avg CYRI-B Optical Density	0.292136
	Avg CYRI-B Copies Per μm²	0.012067		1.2067				Avg CYRI-B Copies Per μm²	0.005854		0.5854
								BAJD34.1h	PDAC
								Name	Value
								Total Tissue Area (μm²)	38903240
								Total CYRI-B Copies	461295
								Total CYRI-B Area (μm²)	115324
								Avg CYRI-B Optical Density	0.305223
								Avg CYRI-B Copies Per μm²	0.011857		1.1857
								BAJD25.2a	PDAC
								Name	Value
								Total Tissue Area (μm²)	143376832
								Total CYRI-B Copies	7858171
								Total CYRI-B Area (μm²)	1.96454e+06
								Avg CYRI-B Optical Density	0.365011
								Avg CYRI-B Copies Per μm²	0.054808		5.4808

## Sheet: 10 weeks
	BAJD91.2b	10 weeks
	Layer 1					Layer 2				Layer 3				Layer 4				Layer 5				Layer 6				Layer 7				Total average
	Name	Value				Name	Value			Name	Value			Name	Value			Name	Value			Name	Value			Name	Value
	Classified Area (mm²)	0.50023				Classified Area (mm²)	0.41256			Classified Area (mm²)	0.80136			Classified Area (mm²)	1.08663			Classified Area (mm²)	0.7268			Classified Area (mm²)	0.4132			Classified Area (mm²)	0.76644
	empty Area (mm²)	0.00026				empty Area (mm²)	0			empty Area (mm²)	0.00081			empty Area (mm²)	0.0001			empty Area (mm²)	0.01445			empty Area (mm²)	0.00077			empty Area (mm²)	0.00017
	Tissue Area (mm²)	0.49997				Tissue Area (mm²)	0.41256			Tissue Area (mm²)	0.80055			Tissue Area (mm²)	1.08653			Tissue Area (mm²)	0.71235			Tissue Area (mm²)	0.41243			Tissue Area (mm²)	0.76626
	Total Tissue Area (μm²)	499261				Total Tissue Area (μm²)	411892			Total Tissue Area (μm²)	799608			Total Tissue Area (μm²)	1085626			Total Tissue Area (μm²)	711800			Total Tissue Area (μm²)	412103			Total Tissue Area (μm²)	766027
	Total CYRI-B Copies	18952				Total CYRI-B Copies	13058			Total CYRI-B Copies	65077			Total CYRI-B Copies	90375			Total CYRI-B Copies	32582			Total CYRI-B Copies	4354			Total CYRI-B Copies	18012
	Total CYRI-B Area (μm²)	4738				Total CYRI-B Area (μm²)	3264.5			Total CYRI-B Area (μm²)	16269.2			Total CYRI-B Area (μm²)	22593.8			Total CYRI-B Area (μm²)	8145.5			Total CYRI-B Area (μm²)	1088.5			Total CYRI-B Area (μm²)	4503
	Avg CYRI-B Optical Density	0.338145				Avg CYRI-B Optical Density	0.317324			Avg CYRI-B Optical Density	0.375959			Avg CYRI-B Optical Density	0.382961			Avg CYRI-B Optical Density	0.35627			Avg CYRI-B Optical Density	0.284916			Avg CYRI-B Optical Density	0.328489
	Avg CYRI-B Copies Per μm²	0.03796		3.796		Avg CYRI-B Copies Per μm²	0.031703	3.1703		Avg CYRI-B Copies Per μm²	0.081386	8.1386		Avg CYRI-B Copies Per μm²	0.083247	8.3247		Avg CYRI-B Copies Per μm²	0.045774	4.5774		Avg CYRI-B Copies Per μm²	0.010565	1.0565		Avg CYRI-B Copies Per μm²	0.023514	2.3514		4.48784
	Tissue: Total Tissue Area (μm²)	499261				Tissue: Total Tissue Area (μm²)	411892			Tissue: Total Tissue Area (μm²)	799608			Tissue: Total Tissue Area (μm²)	1085626			Tissue: Total Tissue Area (μm²)	711800			Tissue: Total Tissue Area (μm²)	412103			Tissue: Total Tissue Area (μm²)	766027
	Tissue: Total CYRI-B Copies	18952				Tissue: Total CYRI-B Copies	13058			Tissue: Total CYRI-B Copies	65077			Tissue: Total CYRI-B Copies	90375			Tissue: Total CYRI-B Copies	32582			Tissue: Total CYRI-B Copies	4354			Tissue: Total CYRI-B Copies	18012
	Tissue: Total CYRI-B Area (μm²)	4738				Tissue: Total CYRI-B Area (μm²)	3264.5			Tissue: Total CYRI-B Area (μm²)	16269.2			Tissue: Total CYRI-B Area (μm²)	22593.8			Tissue: Total CYRI-B Area (μm²)	8145.5			Tissue: Total CYRI-B Area (μm²)	1088.5			Tissue: Total CYRI-B Area (μm²)	4503
	Tissue: Avg CYRI-B Optical Density	0.338145				Tissue: Avg CYRI-B Optical Density	0.317324			Tissue: Avg CYRI-B Optical Density	0.375959			Tissue: Avg CYRI-B Optical Density	0.382961			Tissue: Avg CYRI-B Optical Density	0.35627			Tissue: Avg CYRI-B Optical Density	0.284916			Tissue: Avg CYRI-B Optical Density	0.328489
	Tissue: Avg CYRI-B Copies Per μm²	0.03796				Tissue: Avg CYRI-B Copies Per μm²	0.031703			Tissue: Avg CYRI-B Copies Per μm²	0.081386			Tissue: Avg CYRI-B Copies Per μm²	0.083247			Tissue: Avg CYRI-B Copies Per μm²	0.045774			Tissue: Avg CYRI-B Copies Per μm²	0.010565			Tissue: Avg CYRI-B Copies Per μm²	0.023514
	BAJD91.1d	10 weeks
	Name	Value
	Classified Area (mm²)	0.44638				Name	Value			Name	Value			Name	Value			Name	Value			Name	Value			Name	Value
	empty Area (mm²)	0.00342				Classified Area (mm²)	0.48136			Classified Area (mm²)	0.53756			Classified Area (mm²)	0.40824			Classified Area (mm²)	0.45118			Classified Area (mm²)	0.52008			Classified Area (mm²)	0.45179
	Tissue Area (mm²)	0.44296				empty Area (mm²)	0.00128			empty Area (mm²)	0.00353			empty Area (mm²)	0			empty Area (mm²)	0.00066			empty Area (mm²)	0.0002			empty Area (mm²)	0.03044
	Total Tissue Area (μm²)	442863				Tissue Area (mm²)	0.48008			Tissue Area (mm²)	0.53403			Tissue Area (mm²)	0.40824			Tissue Area (mm²)	0.45052			Tissue Area (mm²)	0.51988			Tissue Area (mm²)	0.42136
	Total CYRI-B Copies	2640				Total Tissue Area (μm²)	479849			Total Tissue Area (μm²)	533911			Total Tissue Area (μm²)	407854			Total Tissue Area (μm²)	450213			Total Tissue Area (μm²)	519489			Total Tissue Area (μm²)	421994
	Total CYRI-B Area (μm²)	660				Total CYRI-B Copies	2219			Total CYRI-B Copies	5844			Total CYRI-B Copies	5226			Total CYRI-B Copies	3851			Total CYRI-B Copies	5345			Total CYRI-B Copies	6819
	Avg CYRI-B Optical Density	0.293015				Total CYRI-B Area (μm²)	554.75			Total CYRI-B Area (μm²)	1461			Total CYRI-B Area (μm²)	1306.5			Total CYRI-B Area (μm²)	962.75			Total CYRI-B Area (μm²)	1336.25			Total CYRI-B Area (μm²)	1704.75
	Avg CYRI-B Copies Per μm²	0.005961		0.5961		Avg CYRI-B Optical Density	0.269244			Avg CYRI-B Optical Density	0.286797			Avg CYRI-B Optical Density	0.283713			Avg CYRI-B Optical Density	0.287068			Avg CYRI-B Optical Density	0.297968			Avg CYRI-B Optical Density	0.326335
	Tissue: Total Tissue Area (μm²)	442863				Avg CYRI-B Copies Per μm²	0.004624	0.4624		Avg CYRI-B Copies Per μm²	0.010946	1.0946		Avg CYRI-B Copies Per μm²	0.012813	1.2813		Avg CYRI-B Copies Per μm²	0.008554	0.8554		Avg CYRI-B Copies Per μm²	0.010289	1.0289		Avg CYRI-B Copies Per μm²	0.016159	1.6159		0.990657
	Tissue: Total CYRI-B Copies	2640				Tissue: Total Tissue Area (μm²)	479849			Tissue: Total Tissue Area (μm²)	533911			Tissue: Total Tissue Area (μm²)	407854			Tissue: Total Tissue Area (μm²)	450213			Tissue: Total Tissue Area (μm²)	519489			Tissue: Total Tissue Area (μm²)	421994
	Tissue: Total CYRI-B Area (μm²)	660				Tissue: Total CYRI-B Copies	2219			Tissue: Total CYRI-B Copies	5844			Tissue: Total CYRI-B Copies	5226			Tissue: Total CYRI-B Copies	3851			Tissue: Total CYRI-B Copies	5345			Tissue: Total CYRI-B Copies	6819
	Tissue: Avg CYRI-B Optical Density	0.293015				Tissue: Total CYRI-B Area (μm²)	554.75			Tissue: Total CYRI-B Area (μm²)	1461			Tissue: Total CYRI-B Area (μm²)	1306.5			Tissue: Total CYRI-B Area (μm²)	962.75			Tissue: Total CYRI-B Area (μm²)	1336.25			Tissue: Total CYRI-B Area (μm²)	1704.75
	Tissue: Avg CYRI-B Copies Per μm²	0.005961				Tissue: Avg CYRI-B Optical Density	0.269244			Tissue: Avg CYRI-B Optical Density	0.286797			Tissue: Avg CYRI-B Optical Density	0.283713			Tissue: Avg CYRI-B Optical Density	0.287068			Tissue: Avg CYRI-B Optical Density	0.297968			Tissue: Avg CYRI-B Optical Density	0.326335
						Tissue: Avg CYRI-B Copies Per μm²	0.004624			Tissue: Avg CYRI-B Copies Per μm²	0.010946			Tissue: Avg CYRI-B Copies Per μm²	0.012813			Tissue: Avg CYRI-B Copies Per μm²	0.008554			Tissue: Avg CYRI-B Copies Per μm²	0.010289			Tissue: Avg CYRI-B Copies Per μm²	0.016159
	BAJD91.1f
	Name	Value				Name	Value			Name	Value			Name	Value			Name	Value			Name	Value			Name	Value
	Classified Area (mm²)	0.44348				Classified Area (mm²)	0.47854			Classified Area (mm²)	0.50592			Classified Area (mm²)	0.42572			Classified Area (mm²)	0.37326			Classified Area (mm²)	0.49076			Classified Area (mm²)	0.45496
	empty Area (mm²)	0.00024				empty Area (mm²)	0.0002			empty Area (mm²)	0			empty Area (mm²)	0.00024			empty Area (mm²)	4e-05			empty Area (mm²)	0			empty Area (mm²)	0
	Tissue Area (mm²)	0.44324				Tissue Area (mm²)	0.47834			Tissue Area (mm²)	0.50592			Tissue Area (mm²)	0.42548			Tissue Area (mm²)	0.37323			Tissue Area (mm²)	0.49076			Tissue Area (mm²)	0.45496
	Total Tissue Area (μm²)	443088				Total Tissue Area (μm²)	478100			Total Tissue Area (μm²)	505503			Total Tissue Area (μm²)	424954			Total Tissue Area (μm²)	373018			Total Tissue Area (μm²)	490505			Total Tissue Area (μm²)	454628
	Total CYRI-B Copies	216				Total CYRI-B Copies	1022			Total CYRI-B Copies	303			Total CYRI-B Copies	547			Total CYRI-B Copies	172			Total CYRI-B Copies	447			Total CYRI-B Copies	399
	Total CYRI-B Area (μm²)	54				Total CYRI-B Area (μm²)	255.5			Total CYRI-B Area (μm²)	75.75			Total CYRI-B Area (μm²)	136.75			Total CYRI-B Area (μm²)	43			Total CYRI-B Area (μm²)	111.75			Total CYRI-B Area (μm²)	99.75
	Avg CYRI-B Optical Density	0.312854				Avg CYRI-B Optical Density	0.250492			Avg CYRI-B Optical Density	0.258722			Avg CYRI-B Optical Density	0.309722			Avg CYRI-B Optical Density	0.212253			Avg CYRI-B Optical Density	0.3205			Avg CYRI-B Optical Density	0.319015
	Avg CYRI-B Copies Per μm²	0.000487	0.0487			Avg CYRI-B Copies Per μm²	0.002138	0.2138		Avg CYRI-B Copies Per μm²	0.000599	0.0599		Avg CYRI-B Copies Per μm²	0.001287	0.1287		Avg CYRI-B Copies Per μm²	0.000461	0.0461		Avg CYRI-B Copies Per μm²	0.000911	0.0911		Avg CYRI-B Copies Per μm²	0.000878	0.0878		0.0965857
	Tissue: Total Tissue Area (μm²)	443088				Tissue: Total Tissue Area (μm²)	478100			Tissue: Total Tissue Area (μm²)	505503			Tissue: Total Tissue Area (μm²)	424954			Tissue: Total Tissue Area (μm²)	373018			Tissue: Total Tissue Area (μm²)	490505			Tissue: Total Tissue Area (μm²)	454628
	Tissue: Total CYRI-B Copies	216				Tissue: Total CYRI-B Copies	1022			Tissue: Total CYRI-B Copies	303			Tissue: Total CYRI-B Copies	547			Tissue: Total CYRI-B Copies	172			Tissue: Total CYRI-B Copies	447			Tissue: Total CYRI-B Copies	399
	Tissue: Total CYRI-B Area (μm²)	54				Tissue: Total CYRI-B Area (μm²)	255.5			Tissue: Total CYRI-B Area (μm²)	75.75			Tissue: Total CYRI-B Area (μm²)	136.75			Tissue: Total CYRI-B Area (μm²)	43			Tissue: Total CYRI-B Area (μm²)	111.75			Tissue: Total CYRI-B Area (μm²)	99.75
	Tissue: Avg CYRI-B Optical Density	0.312854				Tissue: Avg CYRI-B Optical Density	0.250492			Tissue: Avg CYRI-B Optical Density	0.258722			Tissue: Avg CYRI-B Optical Density	0.309722			Tissue: Avg CYRI-B Optical Density	0.212253			Tissue: Avg CYRI-B Optical Density	0.3205			Tissue: Avg CYRI-B Optical Density	0.319015
	Tissue: Avg CYRI-B Copies Per μm²	0.000487				Tissue: Avg CYRI-B Copies Per μm²	0.002138			Tissue: Avg CYRI-B Copies Per μm²	0.000599			Tissue: Avg CYRI-B Copies Per μm²	0.001287			Tissue: Avg CYRI-B Copies Per μm²	0.000461			Tissue: Avg CYRI-B Copies Per μm²	0.000911			Tissue: Avg CYRI-B Copies Per μm²	0.000878
	BAJD92.1b
	Name	Value				Name	Value			Name	Value			Name	Value			Name	Value			Name	Value			Name	Value
	Classified Area (mm²)	0.88592				Classified Area (mm²)	0.42927			Classified Area (mm²)	0.56986			Classified Area (mm²)	0.40515			Classified Area (mm²)	0.54898			Classified Area (mm²)	0.51612			Classified Area (mm²)	0.47531
	empty Area (mm²)	0				empty Area (mm²)	0			empty Area (mm²)	0.00831			empty Area (mm²)	0			empty Area (mm²)	0.02443			empty Area (mm²)	0.00546			empty Area (mm²)	0.00741
	Tissue Area (mm²)	0.88592				Tissue Area (mm²)	0.42927			Tissue Area (mm²)	0.56155			Tissue Area (mm²)	0.40515			Tissue Area (mm²)	0.52456			Tissue Area (mm²)	0.51065			Tissue Area (mm²)	0.4679
	Total Tissue Area (μm²)	884990				Total Tissue Area (μm²)	429085			Total Tissue Area (μm²)	560908			Total Tissue Area (μm²)	404383			Total Tissue Area (μm²)	524583			Total Tissue Area (μm²)	510462			Total Tissue Area (μm²)	467750
	Total CYRI-B Copies	3283				Total CYRI-B Copies	5549			Total CYRI-B Copies	9915			Total CYRI-B Copies	7639			Total CYRI-B Copies	9951			Total CYRI-B Copies	7759			Total CYRI-B Copies	3277
	Total CYRI-B Area (μm²)	820.75				Total CYRI-B Area (μm²)	1387.25			Total CYRI-B Area (μm²)	2478.75			Total CYRI-B Area (μm²)	1909.75			Total CYRI-B Area (μm²)	2487.75			Total CYRI-B Area (μm²)	1939.75			Total CYRI-B Area (μm²)	819.25
	Avg CYRI-B Optical Density	0.266762				Avg CYRI-B Optical Density	0.30437			Avg CYRI-B Optical Density	0.28491			Avg CYRI-B Optical Density	0.322752			Avg CYRI-B Optical Density	0.317521			Avg CYRI-B Optical Density	0.302906			Avg CYRI-B Optical Density	0.283041
	Avg CYRI-B Copies Per μm²	0.00371	0.371			Avg CYRI-B Copies Per μm²	0.012932	1.2932		Avg CYRI-B Copies Per μm²	0.017677	1.7677		Avg CYRI-B Copies Per μm²	0.01889	1.889		Avg CYRI-B Copies Per μm²	0.018969	1.8969		Avg CYRI-B Copies Per μm²	0.0152	1.52		Avg CYRI-B Copies Per μm²	0.007006	0.7006		1.34834
	Tissue: Total Tissue Area (μm²)	884990				Tissue: Total Tissue Area (μm²)	429085			Tissue: Total Tissue Area (μm²)	560908			Tissue: Total Tissue Area (μm²)	404383			Tissue: Total Tissue Area (μm²)	524583			Tissue: Total Tissue Area (μm²)	510462			Tissue: Total Tissue Area (μm²)	467750
	Tissue: Total CYRI-B Copies	3283				Tissue: Total CYRI-B Copies	5549			Tissue: Total CYRI-B Copies	9915			Tissue: Total CYRI-B Copies	7639			Tissue: Total CYRI-B Copies	9951			Tissue: Total CYRI-B Copies	7759			Tissue: Total CYRI-B Copies	3277
	Tissue: Total CYRI-B Area (μm²)	820.75				Tissue: Total CYRI-B Area (μm²)	1387.25			Tissue: Total CYRI-B Area (μm²)	2478.75			Tissue: Total CYRI-B Area (μm²)	1909.75			Tissue: Total CYRI-B Area (μm²)	2487.75			Tissue: Total CYRI-B Area (μm²)	1939.75			Tissue: Total CYRI-B Area (μm²)	819.25
	Tissue: Avg CYRI-B Optical Density	0.266762				Tissue: Avg CYRI-B Optical Density	0.30437			Tissue: Avg CYRI-B Optical Density	0.28491			Tissue: Avg CYRI-B Optical Density	0.322752			Tissue: Avg CYRI-B Optical Density	0.317521			Tissue: Avg CYRI-B Optical Density	0.302906			Tissue: Avg CYRI-B Optical Density	0.283041
	Tissue: Avg CYRI-B Copies Per μm²	0.00371				Tissue: Avg CYRI-B Copies Per μm²	0.012932			Tissue: Avg CYRI-B Copies Per μm²	0.017677			Tissue: Avg CYRI-B Copies Per μm²	0.01889			Tissue: Avg CYRI-B Copies Per μm²	0.018969			Tissue: Avg CYRI-B Copies Per μm²	0.0152			Tissue: Avg CYRI-B Copies Per μm²	0.007006

## Sheet: 15 weeks
	BAJD82.2a	15 weeks
																													Total average in percentage
	Layer 1				Layer 2
	Name	Value			Name	Value			Name	Value			Name	Value			Name	Value			Name	Value			Name	Value
	Classified Area (mm²)	0.72433			Classified Area (mm²)	0.63141			Classified Area (mm²)	0.79721			Classified Area (mm²)	0.46021			Classified Area (mm²)	0.5112			Classified Area (mm²)	0.78219			Classified Area (mm²)	1.23124
	empty Area (mm²)	0.00471			empty Area (mm²)	0			empty Area (mm²)	0.005			empty Area (mm²)	0.00949			empty Area (mm²)	0.00862			empty Area (mm²)	0.04745			empty Area (mm²)	0.00224
	Tissue Area (mm²)	0.71962			Tissue Area (mm²)	0.63141			Tissue Area (mm²)	0.79221			Tissue Area (mm²)	0.45072			Tissue Area (mm²)	0.50258			Tissue Area (mm²)	0.73474			Tissue Area (mm²)	1.229
	Total Tissue Area (μm²)	719427			Total Tissue Area (μm²)	631262			Total Tissue Area (μm²)	792016			Total Tissue Area (μm²)	450651			Total Tissue Area (μm²)	502652			Total Tissue Area (μm²)	734743			Total Tissue Area (μm²)	1.22884e+06
	Total CYRI-B Copies	5188			Total CYRI-B Copies	5647			Total CYRI-B Copies	6642			Total CYRI-B Copies	4332			Total CYRI-B Copies	7438			Total CYRI-B Copies	4855			Total CYRI-B Copies	3672
	Total CYRI-B Area (μm²)	1297			Total CYRI-B Area (μm²)	1411.75			Total CYRI-B Area (μm²)	1660.5			Total CYRI-B Area (μm²)	1083			Total CYRI-B Area (μm²)	1859.5			Total CYRI-B Area (μm²)	1213.75			Total CYRI-B Area (μm²)	918
	Avg CYRI-B Optical Density	0.283522			Avg CYRI-B Optical Density	0.273346			Avg CYRI-B Optical Density	0.283419			Avg CYRI-B Optical Density	0.317744			Avg CYRI-B Optical Density	0.3162			Avg CYRI-B Optical Density	0.301909			Avg CYRI-B Optical Density	0.250501
	Avg CYRI-B Copies Per μm²	0.007211	0.7211		Avg CYRI-B Copies Per μm²	0.008946	0.8946		Avg CYRI-B Copies Per μm²	0.008386	0.8386		Avg CYRI-B Copies Per μm²	0.009613	0.9613		Avg CYRI-B Copies Per μm²	0.014798	1.4798		Avg CYRI-B Copies Per μm²	0.006608	0.6608		Avg CYRI-B Copies Per μm²	0.002988	0.2988		0.836429
	Tissue: Total Tissue Area (μm²)	719427			Tissue: Total Tissue Area (μm²)	631262			Tissue: Total Tissue Area (μm²)	792016			Tissue: Total Tissue Area (μm²)	450651			Tissue: Total Tissue Area (μm²)	502652			Tissue: Total Tissue Area (μm²)	734743			Tissue: Total Tissue Area (μm²)	1.22884e+06
	Tissue: Total CYRI-B Copies	5188			Tissue: Total CYRI-B Copies	5647			Tissue: Total CYRI-B Copies	6642			Tissue: Total CYRI-B Copies	4332			Tissue: Total CYRI-B Copies	7438			Tissue: Total CYRI-B Copies	4855			Tissue: Total CYRI-B Copies	3672
	Tissue: Total CYRI-B Area (μm²)	1297			Tissue: Total CYRI-B Area (μm²)	1411.75			Tissue: Total CYRI-B Area (μm²)	1660.5			Tissue: Total CYRI-B Area (μm²)	1083			Tissue: Total CYRI-B Area (μm²)	1859.5			Tissue: Total CYRI-B Area (μm²)	1213.75			Tissue: Total CYRI-B Area (μm²)	918
	Tissue: Avg CYRI-B Optical Density	0.283522			Tissue: Avg CYRI-B Optical Density	0.273346			Tissue: Avg CYRI-B Optical Density	0.283419			Tissue: Avg CYRI-B Optical Density	0.317744			Tissue: Avg CYRI-B Optical Density	0.3162			Tissue: Avg CYRI-B Optical Density	0.301909			Tissue: Avg CYRI-B Optical Density	0.250501
	Tissue: Avg CYRI-B Copies Per μm²	0.007211			Tissue: Avg CYRI-B Copies Per μm²	0.008946			Tissue: Avg CYRI-B Copies Per μm²	0.008386			Tissue: Avg CYRI-B Copies Per μm²	0.009613			Tissue: Avg CYRI-B Copies Per μm²	0.014798			Tissue: Avg CYRI-B Copies Per μm²	0.006608			Tissue: Avg CYRI-B Copies Per μm²	0.002988
	BAJD90.1d	15 weeks
	Name	Value			Name	Value			Name	Value			Name	Value			Name	Value			Name	Value			Name	Value
	Classified Area (mm²)	2.51296			Classified Area (mm²)	0.79337			Classified Area (mm²)	0.7037			Classified Area (mm²)	0.80825			Classified Area (mm²)	0.65366			Classified Area (mm²)	0.39711			Classified Area (mm²)	0.87665
	empty Area (mm²)	0.00403			empty Area (mm²)	0.00018			empty Area (mm²)	0			empty Area (mm²)	0			empty Area (mm²)	0.00167			empty Area (mm²)	0.00624			empty Area (mm²)	0.00477
	Tissue Area (mm²)	2.50893			Tissue Area (mm²)	0.7932			Tissue Area (mm²)	0.7037			Tissue Area (mm²)	0.80825			Tissue Area (mm²)	0.65199			Tissue Area (mm²)	0.39087			Tissue Area (mm²)	0.87188
	Total Tissue Area (μm²)	2.50771e+06			Total Tissue Area (μm²)	792988			Total Tissue Area (μm²)	703397			Total Tissue Area (μm²)	807908			Total Tissue Area (μm²)	651782			Total Tissue Area (μm²)	390740			Total Tissue Area (μm²)	871757
	Total CYRI-B Copies	114989			Total CYRI-B Copies	51023			Total CYRI-B Copies	57016			Total CYRI-B Copies	43705			Total CYRI-B Copies	13255			Total CYRI-B Copies	7091			Total CYRI-B Copies	18647
	Total CYRI-B Area (μm²)	28747.2			Total CYRI-B Area (μm²)	12755.8			Total CYRI-B Area (μm²)	14254			Total CYRI-B Area (μm²)	10926.2			Total CYRI-B Area (μm²)	3313.75			Total CYRI-B Area (μm²)	1772.75			Total CYRI-B Area (μm²)	4661.75
	Avg CYRI-B Optical Density	0.338			Avg CYRI-B Optical Density	0.356576			Avg CYRI-B Optical Density	0.349896			Avg CYRI-B Optical Density	0.322125			Avg CYRI-B Optical Density	0.345614			Avg CYRI-B Optical Density	0.309004			Avg CYRI-B Optical Density	0.30602
	Avg CYRI-B Copies Per μm²	0.045854	4.5854		Avg CYRI-B Copies Per μm²	0.064343	6.4343		Avg CYRI-B Copies Per μm²	0.081058	8.1058		Avg CYRI-B Copies Per μm²	0.054096	5.4096		Avg CYRI-B Copies Per μm²	0.020337	2.0337		Avg CYRI-B Copies Per μm²	0.018148	1.8148		Avg CYRI-B Copies Per μm²	0.02139	2.139		4.36037
	Tissue: Total Tissue Area (μm²)	2.50771e+06			Tissue: Total Tissue Area (μm²)	792988			Tissue: Total Tissue Area (μm²)	703397			Tissue: Total Tissue Area (μm²)	807908			Tissue: Total Tissue Area (μm²)	651782			Tissue: Total Tissue Area (μm²)	390740			Tissue: Total Tissue Area (μm²)	871757
	Tissue: Total CYRI-B Copies	114989			Tissue: Total CYRI-B Copies	51023			Tissue: Total CYRI-B Copies	57016			Tissue: Total CYRI-B Copies	43705			Tissue: Total CYRI-B Copies	13255			Tissue: Total CYRI-B Copies	7091			Tissue: Total CYRI-B Copies	18647
	Tissue: Total CYRI-B Area (μm²)	28747.2			Tissue: Total CYRI-B Area (μm²)	12755.8			Tissue: Total CYRI-B Area (μm²)	14254			Tissue: Total CYRI-B Area (μm²)	10926.2			Tissue: Total CYRI-B Area (μm²)	3313.75			Tissue: Total CYRI-B Area (μm²)	1772.75			Tissue: Total CYRI-B Area (μm²)	4661.75
	Tissue: Avg CYRI-B Optical Density	0.338			Tissue: Avg CYRI-B Optical Density	0.356576			Tissue: Avg CYRI-B Optical Density	0.349896			Tissue: Avg CYRI-B Optical Density	0.322125			Tissue: Avg CYRI-B Optical Density	0.345614			Tissue: Avg CYRI-B Optical Density	0.309004			Tissue: Avg CYRI-B Optical Density	0.30602
	Tissue: Avg CYRI-B Copies Per μm²	0.045854			Tissue: Avg CYRI-B Copies Per μm²	0.064343			Tissue: Avg CYRI-B Copies Per μm²	0.081058			Tissue: Avg CYRI-B Copies Per μm²	0.054096			Tissue: Avg CYRI-B Copies Per μm²	0.020337			Tissue: Avg CYRI-B Copies Per μm²	0.018148			Tissue: Avg CYRI-B Copies Per μm²	0.02139
	BAJD93.1b	15 weeks
	Name	Value			Name	Value			Name	Value			Name	Value			Name	Value			Name	Value			Name	Value
	Classified Area (mm²)	0.88966			Classified Area (mm²)	0.69314			Classified Area (mm²)	0.60933			Classified Area (mm²)	0.5278			Classified Area (mm²)	0.474			Classified Area (mm²)	0.63749			Classified Area (mm²)	0.76743
	empty Area (mm²)	0.00306			empty Area (mm²)	0			empty Area (mm²)	0.01058			empty Area (mm²)	0.00066			empty Area (mm²)	0.00481			empty Area (mm²)	0.04093			empty Area (mm²)	0.00693
	Tissue Area (mm²)	0.8866			Tissue Area (mm²)	0.69314			Tissue Area (mm²)	0.59875			Tissue Area (mm²)	0.52714			Tissue Area (mm²)	0.46919			Tissue Area (mm²)	0.59656			Tissue Area (mm²)	0.7605
	Total Tissue Area (μm²)	886092			Total Tissue Area (μm²)	692894			Total Tissue Area (μm²)	598706			Total Tissue Area (μm²)	526846			Total Tissue Area (μm²)	468984			Total Tissue Area (μm²)	597884			Total Tissue Area (μm²)	760434
	Total CYRI-B Copies	4469			Total CYRI-B Copies	4732			Total CYRI-B Copies	1394			Total CYRI-B Copies	15217			Total CYRI-B Copies	4081			Total CYRI-B Copies	8077			Total CYRI-B Copies	8953
	Total CYRI-B Area (μm²)	1117.25			Total CYRI-B Area (μm²)	1183			Total CYRI-B Area (μm²)	348.5			Total CYRI-B Area (μm²)	3804.25			Total CYRI-B Area (μm²)	1020.25			Total CYRI-B Area (μm²)	2019.25			Total CYRI-B Area (μm²)	2238.25
	Avg CYRI-B Optical Density	0.272759			Avg CYRI-B Optical Density	0.305653			Avg CYRI-B Optical Density	0.26565			Avg CYRI-B Optical Density	0.332476			Avg CYRI-B Optical Density	0.27009			Avg CYRI-B Optical Density	0.333057			Avg CYRI-B Optical Density	0.307352
	Avg CYRI-B Copies Per μm²	0.005043	0.5043		Avg CYRI-B Copies Per μm²	0.006829	0.6829		Avg CYRI-B Copies Per μm²	0.002328	0.2328		Avg CYRI-B Copies Per μm²	0.028883	2.8883		Avg CYRI-B Copies Per μm²	0.008702	0.8702		Avg CYRI-B Copies Per μm²	0.013509	1.3509		Avg CYRI-B Copies Per μm²	0.011774	1.1774		1.10097
	Tissue: Total Tissue Area (μm²)	886092			Tissue: Total Tissue Area (μm²)	692894			Tissue: Total Tissue Area (μm²)	598706			Tissue: Total Tissue Area (μm²)	526846			Tissue: Total Tissue Area (μm²)	468984			Tissue: Total Tissue Area (μm²)	597884			Tissue: Total Tissue Area (μm²)	760434
	Tissue: Total CYRI-B Copies	4469			Tissue: Total CYRI-B Copies	4732			Tissue: Total CYRI-B Copies	1394			Tissue: Total CYRI-B Copies	15217			Tissue: Total CYRI-B Copies	4081			Tissue: Total CYRI-B Copies	8077			Tissue: Total CYRI-B Copies	8953
	Tissue: Total CYRI-B Area (μm²)	1117.25			Tissue: Total CYRI-B Area (μm²)	1183			Tissue: Total CYRI-B Area (μm²)	348.5			Tissue: Total CYRI-B Area (μm²)	3804.25			Tissue: Total CYRI-B Area (μm²)	1020.25			Tissue: Total CYRI-B Area (μm²)	2019.25			Tissue: Total CYRI-B Area (μm²)	2238.25
	Tissue: Avg CYRI-B Optical Density	0.272759			Tissue: Avg CYRI-B Optical Density	0.305653			Tissue: Avg CYRI-B Optical Density	0.26565			Tissue: Avg CYRI-B Optical Density	0.332476			Tissue: Avg CYRI-B Optical Density	0.27009			Tissue: Avg CYRI-B Optical Density	0.333057			Tissue: Avg CYRI-B Optical Density	0.307352
	Tissue: Avg CYRI-B Copies Per μm²	0.005043			Tissue: Avg CYRI-B Copies Per μm²	0.006829			Tissue: Avg CYRI-B Copies Per μm²	0.002328			Tissue: Avg CYRI-B Copies Per μm²	0.028883			Tissue: Avg CYRI-B Copies Per μm²	0.008702			Tissue: Avg CYRI-B Copies Per μm²	0.013509			Tissue: Avg CYRI-B Copies Per μm²	0.011774
	BAJD93.1d	15 weeks
	Name	Value			Name	Value			Name	Value			Name	Value			Name	Value			Name	Value			Name	Value
	Classified Area (mm²)	0.45007			Classified Area (mm²)	0.73042			Classified Area (mm²)	0.74522			Classified Area (mm²)	0.60068			Classified Area (mm²)	0.51242			Classified Area (mm²)	0.49535			Classified Area (mm²)	0.55703
	empty Area (mm²)	0.00092			empty Area (mm²)	0.00028			empty Area (mm²)	0.00182			empty Area (mm²)	0.00087			empty Area (mm²)	0.00465			empty Area (mm²)	0.00118			empty Area (mm²)	0.02087
	Tissue Area (mm²)	0.44915			Tissue Area (mm²)	0.73014			Tissue Area (mm²)	0.7434			Tissue Area (mm²)	0.59981			Tissue Area (mm²)	0.50777			Tissue Area (mm²)	0.49416			Tissue Area (mm²)	0.53616
	Total Tissue Area (μm²)	448902			Total Tissue Area (μm²)	729914			Total Tissue Area (μm²)	743090			Total Tissue Area (μm²)	599639			Total Tissue Area (μm²)	507785			Total Tissue Area (μm²)	493900			Total Tissue Area (μm²)	536367
	Total CYRI-B Copies	21691			Total CYRI-B Copies	37941			Total CYRI-B Copies	19462			Total CYRI-B Copies	5633			Total CYRI-B Copies	8636			Total CYRI-B Copies	3989			Total CYRI-B Copies	4892
	Total CYRI-B Area (μm²)	5422.75			Total CYRI-B Area (μm²)	9485.25			Total CYRI-B Area (μm²)	4865.5			Total CYRI-B Area (μm²)	1408.25			Total CYRI-B Area (μm²)	2159			Total CYRI-B Area (μm²)	997.25			Total CYRI-B Area (μm²)	1223
	Avg CYRI-B Optical Density	0.362007			Avg CYRI-B Optical Density	0.352086			Avg CYRI-B Optical Density	0.338938			Avg CYRI-B Optical Density	0.306925			Avg CYRI-B Optical Density	0.334033			Avg CYRI-B Optical Density	0.310842			Avg CYRI-B Optical Density	0.304317
	Avg CYRI-B Copies Per μm²	0.04832	4.832		Avg CYRI-B Copies Per μm²	0.05198	5.198		Avg CYRI-B Copies Per μm²	0.026191	2.6191		Avg CYRI-B Copies Per μm²	0.009394	0.9394		Avg CYRI-B Copies Per μm²	0.017007	1.7007		Avg CYRI-B Copies Per μm²	0.008077	0.8077		Avg CYRI-B Copies Per μm²	0.009121	0.9121		2.42986
	Tissue: Total Tissue Area (μm²)	448902			Tissue: Total Tissue Area (μm²)	729914			Tissue: Total Tissue Area (μm²)	743090			Tissue: Total Tissue Area (μm²)	599639			Tissue: Total Tissue Area (μm²)	507785			Tissue: Total Tissue Area (μm²)	493900			Tissue: Total Tissue Area (μm²)	536367
	Tissue: Total CYRI-B Copies	21691			Tissue: Total CYRI-B Copies	37941			Tissue: Total CYRI-B Copies	19462			Tissue: Total CYRI-B Copies	5633			Tissue: Total CYRI-B Copies	8636			Tissue: Total CYRI-B Copies	3989			Tissue: Total CYRI-B Copies	4892
	Tissue: Total CYRI-B Area (μm²)	5422.75			Tissue: Total CYRI-B Area (μm²)	9485.25			Tissue: Total CYRI-B Area (μm²)	4865.5			Tissue: Total CYRI-B Area (μm²)	1408.25			Tissue: Total CYRI-B Area (μm²)	2159			Tissue: Total CYRI-B Area (μm²)	997.25			Tissue: Total CYRI-B Area (μm²)	1223
	Tissue: Avg CYRI-B Optical Density	0.362007			Tissue: Avg CYRI-B Optical Density	0.352086			Tissue: Avg CYRI-B Optical Density	0.338938			Tissue: Avg CYRI-B Optical Density	0.306925			Tissue: Avg CYRI-B Optical Density	0.334033			Tissue: Avg CYRI-B Optical Density	0.310842			Tissue: Avg CYRI-B Optical Density	0.304317
	Tissue: Avg CYRI-B Copies Per μm²	0.04832			Tissue: Avg CYRI-B Copies Per μm²	0.05198			Tissue: Avg CYRI-B Copies Per μm²	0.026191			Tissue: Avg CYRI-B Copies Per μm²	0.009394			Tissue: Avg CYRI-B Copies Per μm²	0.017007			Tissue: Avg CYRI-B Copies Per μm²	0.008077			Tissue: Avg CYRI-B Copies Per μm²	0.009121
	BAJD91.2d	15 weeks
	Name	Value			Name	Value			Name	Value			Name	Value			Name	Value			Name	Value			Name	Value
	Classified Area (mm²)	0.49435			Classified Area (mm²)	0.90919			Classified Area (mm²)	0.42533			Classified Area (mm²)	0.4495			Classified Area (mm²)	0.73884			Classified Area (mm²)	0.40818			Classified Area (mm²)	0.62846
	empty Area (mm²)	0.00342			empty Area (mm²)	0.01374			empty Area (mm²)	0.00529			empty Area (mm²)	0.00722			empty Area (mm²)	0.01059			empty Area (mm²)	0			empty Area (mm²)	0
	Tissue Area (mm²)	0.49092			Tissue Area (mm²)	0.89544			Tissue Area (mm²)	0.42004			Tissue Area (mm²)	0.44228			Tissue Area (mm²)	0.72826			Tissue Area (mm²)	0.40818			Tissue Area (mm²)	0.62846
	Total Tissue Area (μm²)	490761			Total Tissue Area (μm²)	895470			Total Tissue Area (μm²)	420058			Total Tissue Area (μm²)	442191			Total Tissue Area (μm²)	728048			Total Tissue Area (μm²)	407939			Total Tissue Area (μm²)	628151
	Total CYRI-B Copies	10047			Total CYRI-B Copies	14672			Total CYRI-B Copies	8120			Total CYRI-B Copies	9238			Total CYRI-B Copies	7300			Total CYRI-B Copies	3200			Total CYRI-B Copies	12132
	Total CYRI-B Area (μm²)	2511.75			Total CYRI-B Area (μm²)	3668			Total CYRI-B Area (μm²)	2030			Total CYRI-B Area (μm²)	2309.5			Total CYRI-B Area (μm²)	1825			Total CYRI-B Area (μm²)	800			Total CYRI-B Area (μm²)	3033
	Avg CYRI-B Optical Density	0.324781			Avg CYRI-B Optical Density	0.316589			Avg CYRI-B Optical Density	0.322057			Avg CYRI-B Optical Density	0.321513			Avg CYRI-B Optical Density	0.312632			Avg CYRI-B Optical Density	0.305837			Avg CYRI-B Optical Density	0.323731
	Avg CYRI-B Copies Per μm²	0.020472	2.0472		Avg CYRI-B Copies Per μm²	0.016385	1.6385		Avg CYRI-B Copies Per μm²	0.019331	1.9331		Avg CYRI-B Copies Per μm²	0.020891	2.0891		Avg CYRI-B Copies Per μm²	0.010027	1.0027		Avg CYRI-B Copies Per μm²	0.007844	0.7844		Avg CYRI-B Copies Per μm²	0.019314	1.9314		1.63234
	Tissue: Total Tissue Area (μm²)	490761			Tissue: Total Tissue Area (μm²)	895470			Tissue: Total Tissue Area (μm²)	420058			Tissue: Total Tissue Area (μm²)	442191			Tissue: Total Tissue Area (μm²)	728048			Tissue: Total Tissue Area (μm²)	407939			Tissue: Total Tissue Area (μm²)	628151
	Tissue: Total CYRI-B Copies	10047			Tissue: Total CYRI-B Copies	14672			Tissue: Total CYRI-B Copies	8120			Tissue: Total CYRI-B Copies	9238			Tissue: Total CYRI-B Copies	7300			Tissue: Total CYRI-B Copies	3200			Tissue: Total CYRI-B Copies	12132
	Tissue: Total CYRI-B Area (μm²)	2511.75			Tissue: Total CYRI-B Area (μm²)	3668			Tissue: Total CYRI-B Area (μm²)	2030			Tissue: Total CYRI-B Area (μm²)	2309.5			Tissue: Total CYRI-B Area (μm²)	1825			Tissue: Total CYRI-B Area (μm²)	800			Tissue: Total CYRI-B Area (μm²)	3033
	Tissue: Avg CYRI-B Optical Density	0.324781			Tissue: Avg CYRI-B Optical Density	0.316589			Tissue: Avg CYRI-B Optical Density	0.322057			Tissue: Avg CYRI-B Optical Density	0.321513			Tissue: Avg CYRI-B Optical Density	0.312632			Tissue: Avg CYRI-B Optical Density	0.305837			Tissue: Avg CYRI-B Optical Density	0.323731
	Tissue: Avg CYRI-B Copies Per μm²	0.020472			Tissue: Avg CYRI-B Copies Per μm²	0.016385			Tissue: Avg CYRI-B Copies Per μm²	0.019331			Tissue: Avg CYRI-B Copies Per μm²	0.020891			Tissue: Avg CYRI-B Copies Per μm²	0.010027			Tissue: Avg CYRI-B Copies Per μm²	0.007844			Tissue: Avg CYRI-B Copies Per μm²	0.019314

## Sheet: end point
		END POINT
	BAJD81.2b
																													Average in percentage:
	Name	Value			Name	Value			Name	Value			Name	Value			Name	Value			Name	Value			Name	Value
	Classified Area (mm²)	0.44419			Classified Area (mm²)	0.52007			Classified Area (mm²)	0.46209			Classified Area (mm²)	0.99184			Classified Area (mm²)	0.49484			Classified Area (mm²)	0.64814			Classified Area (mm²)	1.09748
	empty Area (mm²)	0			empty Area (mm²)	0.0031			empty Area (mm²)	0			empty Area (mm²)	0			empty Area (mm²)	0.00251			empty Area (mm²)	0.00039			empty Area (mm²)	0.00175
	Tissue Area (mm²)	0.44419			Tissue Area (mm²)	0.51697			Tissue Area (mm²)	0.46209			Tissue Area (mm²)	0.99183			Tissue Area (mm²)	0.49233			Tissue Area (mm²)	0.64774			Tissue Area (mm²)	1.09574
	Total Tissue Area (μm²)	443824			Total Tissue Area (μm²)	516770			Total Tissue Area (μm²)	461665			Total Tissue Area (μm²)	990943			Total Tissue Area (μm²)	492174			Total Tissue Area (μm²)	647612			Total Tissue Area (μm²)	1.09514e+06
	Total CYRI-B Copies	23913			Total CYRI-B Copies	29621			Total CYRI-B Copies	29992			Total CYRI-B Copies	24379			Total CYRI-B Copies	43376			Total CYRI-B Copies	80075			Total CYRI-B Copies	75741
	Total CYRI-B Area (μm²)	5978.25			Total CYRI-B Area (μm²)	7405.25			Total CYRI-B Area (μm²)	7498			Total CYRI-B Area (μm²)	6094.75			Total CYRI-B Area (μm²)	10844			Total CYRI-B Area (μm²)	20018.8			Total CYRI-B Area (μm²)	18935.2
	Avg CYRI-B Optical Density	0.321372			Avg CYRI-B Optical Density	0.331971			Avg CYRI-B Optical Density	0.326577			Avg CYRI-B Optical Density	0.298466			Avg CYRI-B Optical Density	0.36323			Avg CYRI-B Optical Density	0.379724			Avg CYRI-B Optical Density	0.344355
	Avg CYRI-B Copies Per μm²	0.053879	5.3879		Avg CYRI-B Copies Per μm²	0.05732	5.732		Avg CYRI-B Copies Per μm²	0.064965	6.4965		Avg CYRI-B Copies Per μm²	0.024602	2.4602		Avg CYRI-B Copies Per μm²	0.088131	8.8131		Avg CYRI-B Copies Per μm²	0.123647	12.3647		Avg CYRI-B Copies Per μm²	0.069161	6.9161		6.8815
	Tissue: Total Tissue Area (μm²)	443824			Tissue: Total Tissue Area (μm²)	516770			Tissue: Total Tissue Area (μm²)	461665			Tissue: Total Tissue Area (μm²)	990943			Tissue: Total Tissue Area (μm²)	492174			Tissue: Total Tissue Area (μm²)	647612			Tissue: Total Tissue Area (μm²)	1.09514e+06
	Tissue: Total CYRI-B Copies	23913			Tissue: Total CYRI-B Copies	29621			Tissue: Total CYRI-B Copies	29992			Tissue: Total CYRI-B Copies	24379			Tissue: Total CYRI-B Copies	43376			Tissue: Total CYRI-B Copies	80075			Tissue: Total CYRI-B Copies	75741
	Tissue: Total CYRI-B Area (μm²)	5978.25			Tissue: Total CYRI-B Area (μm²)	7405.25			Tissue: Total CYRI-B Area (μm²)	7498			Tissue: Total CYRI-B Area (μm²)	6094.75			Tissue: Total CYRI-B Area (μm²)	10844			Tissue: Total CYRI-B Area (μm²)	20018.8			Tissue: Total CYRI-B Area (μm²)	18935.2
	Tissue: Avg CYRI-B Optical Density	0.321372			Tissue: Avg CYRI-B Optical Density	0.331971			Tissue: Avg CYRI-B Optical Density	0.326577			Tissue: Avg CYRI-B Optical Density	0.298466			Tissue: Avg CYRI-B Optical Density	0.36323			Tissue: Avg CYRI-B Optical Density	0.379724			Tissue: Avg CYRI-B Optical Density	0.344355
	Tissue: Avg CYRI-B Copies Per μm²	0.053879			Tissue: Avg CYRI-B Copies Per μm²	0.05732			Tissue: Avg CYRI-B Copies Per μm²	0.064965			Tissue: Avg CYRI-B Copies Per μm²	0.024602			Tissue: Avg CYRI-B Copies Per μm²	0.088131			Tissue: Avg CYRI-B Copies Per μm²	0.123647			Tissue: Avg CYRI-B Copies Per μm²	0.069161
	BAJD34.1h
	Name	Value			Name	Value			Name	Value			Name	Value			Name	Value			Name	Value			Name	Value
	Classified Area (mm²)	0.41369			Classified Area (mm²)	0.50248			Classified Area (mm²)	0.40568			Classified Area (mm²)	0.41826			Classified Area (mm²)	0.4266			Classified Area (mm²)	0.45132			Classified Area (mm²)	0.5044
	empty Area (mm²)	0.00155			empty Area (mm²)	0.00146			empty Area (mm²)	0			empty Area (mm²)	0.0023			empty Area (mm²)	3e-05			empty Area (mm²)	0.00414			empty Area (mm²)	0.00196
	Tissue Area (mm²)	0.41214			Tissue Area (mm²)	0.50102			Tissue Area (mm²)	0.40568			Tissue Area (mm²)	0.41596			Tissue Area (mm²)	0.42658			Tissue Area (mm²)	0.44719			Tissue Area (mm²)	0.50244
	Total Tissue Area (μm²)	411814			Total Tissue Area (μm²)	500884			Total Tissue Area (μm²)	405338			Total Tissue Area (μm²)	415808			Total Tissue Area (μm²)	426300			Total Tissue Area (μm²)	446972			Total Tissue Area (μm²)	501803
	Total CYRI-B Copies	12641			Total CYRI-B Copies	55766			Total CYRI-B Copies	26362			Total CYRI-B Copies	12440			Total CYRI-B Copies	8710			Total CYRI-B Copies	4420			Total CYRI-B Copies	13076
	Total CYRI-B Area (μm²)	3160.25			Total CYRI-B Area (μm²)	13941.5			Total CYRI-B Area (μm²)	6590.5			Total CYRI-B Area (μm²)	3110			Total CYRI-B Area (μm²)	2177.5			Total CYRI-B Area (μm²)	1105			Total CYRI-B Area (μm²)	3269
	Avg CYRI-B Optical Density	0.314053			Avg CYRI-B Optical Density	0.353424			Avg CYRI-B Optical Density	0.333592			Avg CYRI-B Optical Density	0.320264			Avg CYRI-B Optical Density	0.322391			Avg CYRI-B Optical Density	0.285706			Avg CYRI-B Optical Density	0.322288
	Avg CYRI-B Copies Per μm²	0.030696	3.0696		Avg CYRI-B Copies Per μm²	0.111335	11.1335		Avg CYRI-B Copies Per μm²	0.065037	6.5037		Avg CYRI-B Copies Per μm²	0.029918	2.9918		Avg CYRI-B Copies Per μm²	0.020432	2.0432		Avg CYRI-B Copies Per μm²	0.009889	0.9889		Avg CYRI-B Copies Per μm²	0.026058	2.6058		4.19093
	Tissue: Total Tissue Area (μm²)	411814			Tissue: Total Tissue Area (μm²)	500884			Tissue: Total Tissue Area (μm²)	405338			Tissue: Total Tissue Area (μm²)	415808			Tissue: Total Tissue Area (μm²)	426300			Tissue: Total Tissue Area (μm²)	446972			Tissue: Total Tissue Area (μm²)	501803
	Tissue: Total CYRI-B Copies	12641			Tissue: Total CYRI-B Copies	55766			Tissue: Total CYRI-B Copies	26362			Tissue: Total CYRI-B Copies	12440			Tissue: Total CYRI-B Copies	8710			Tissue: Total CYRI-B Copies	4420			Tissue: Total CYRI-B Copies	13076
	Tissue: Total CYRI-B Area (μm²)	3160.25			Tissue: Total CYRI-B Area (μm²)	13941.5			Tissue: Total CYRI-B Area (μm²)	6590.5			Tissue: Total CYRI-B Area (μm²)	3110			Tissue: Total CYRI-B Area (μm²)	2177.5			Tissue: Total CYRI-B Area (μm²)	1105			Tissue: Total CYRI-B Area (μm²)	3269
	Tissue: Avg CYRI-B Optical Density	0.314053			Tissue: Avg CYRI-B Optical Density	0.353424			Tissue: Avg CYRI-B Optical Density	0.333592			Tissue: Avg CYRI-B Optical Density	0.320264			Tissue: Avg CYRI-B Optical Density	0.322391			Tissue: Avg CYRI-B Optical Density	0.285706			Tissue: Avg CYRI-B Optical Density	0.322288
	Tissue: Avg CYRI-B Copies Per μm²	0.030696			Tissue: Avg CYRI-B Copies Per μm²	0.111335			Tissue: Avg CYRI-B Copies Per μm²	0.065037			Tissue: Avg CYRI-B Copies Per μm²	0.029918			Tissue: Avg CYRI-B Copies Per μm²	0.020432			Tissue: Avg CYRI-B Copies Per μm²	0.009889			Tissue: Avg CYRI-B Copies Per μm²	0.026058
	BAJD25.2a
	Name	Value			Name	Value			Name	Value			Name	Value			Name	Value			Name	Value			Name	Value
	Classified Area (mm²)	4.08727			Classified Area (mm²)	4.89521			Classified Area (mm²)	1.75548			Classified Area (mm²)	1.35026			Classified Area (mm²)	1.08194			Classified Area (mm²)	0.87598			Classified Area (mm²)	0.9478
	empty Area (mm²)	0.03606			empty Area (mm²)	0.03414			empty Area (mm²)	6e-05			empty Area (mm²)	0.00015			empty Area (mm²)	0.00904			empty Area (mm²)	0.00223			empty Area (mm²)	0.00393
	Tissue Area (mm²)	4.05121			Tissue Area (mm²)	4.86107			Tissue Area (mm²)	1.75542			Tissue Area (mm²)	1.35011			Tissue Area (mm²)	1.0729			Tissue Area (mm²)	0.87374			Tissue Area (mm²)	0.94387
	Total Tissue Area (μm²)	4.05056e+06			Total Tissue Area (μm²)	4859882			Total Tissue Area (μm²)	1753981			Total Tissue Area (μm²)	1.34984e+06			Total Tissue Area (μm²)	1071904			Total Tissue Area (μm²)	872949			Total Tissue Area (μm²)	943422
	Total CYRI-B Copies	605512			Total CYRI-B Copies	555629			Total CYRI-B Copies	236227			Total CYRI-B Copies	260751			Total CYRI-B Copies	151298			Total CYRI-B Copies	109403			Total CYRI-B Copies	92413
	Total CYRI-B Area (μm²)	151378			Total CYRI-B Area (μm²)	138907			Total CYRI-B Area (μm²)	59056.8			Total CYRI-B Area (μm²)	65187.8			Total CYRI-B Area (μm²)	37824.5			Total CYRI-B Area (μm²)	27350.8			Total CYRI-B Area (μm²)	23103.2
	Avg CYRI-B Optical Density	0.372515			Avg CYRI-B Optical Density	0.362073			Avg CYRI-B Optical Density	0.356267			Avg CYRI-B Optical Density	0.389732			Avg CYRI-B Optical Density	0.38382			Avg CYRI-B Optical Density	0.382959			Avg CYRI-B Optical Density	0.365802
	Avg CYRI-B Copies Per μm²	0.149488	14.9488		Avg CYRI-B Copies Per μm²	0.11433	11.433		Avg CYRI-B Copies Per μm²	0.13468	13.468		Avg CYRI-B Copies Per μm²	0.193172	19.3172		Avg CYRI-B Copies Per μm²	0.141149	14.1149		Avg CYRI-B Copies Per μm²	0.125326	12.5326		Avg CYRI-B Copies Per μm²	0.097955	9.7955		13.6586
	Tissue: Total Tissue Area (μm²)	4.05056e+06			Tissue: Total Tissue Area (μm²)	4859882			Tissue: Total Tissue Area (μm²)	1753981			Tissue: Total Tissue Area (μm²)	1.34984e+06			Tissue: Total Tissue Area (μm²)	1071904			Tissue: Total Tissue Area (μm²)	872949			Tissue: Total Tissue Area (μm²)	943422
	Tissue: Total CYRI-B Copies	605512			Tissue: Total CYRI-B Copies	555629			Tissue: Total CYRI-B Copies	236227			Tissue: Total CYRI-B Copies	260751			Tissue: Total CYRI-B Copies	151298			Tissue: Total CYRI-B Copies	109403			Tissue: Total CYRI-B Copies	92413
	Tissue: Total CYRI-B Area (μm²)	151378			Tissue: Total CYRI-B Area (μm²)	138907			Tissue: Total CYRI-B Area (μm²)	59056.8			Tissue: Total CYRI-B Area (μm²)	65187.8			Tissue: Total CYRI-B Area (μm²)	37824.5			Tissue: Total CYRI-B Area (μm²)	27350.8			Tissue: Total CYRI-B Area (μm²)	23103.2
	Tissue: Avg CYRI-B Optical Density	0.372515			Tissue: Avg CYRI-B Optical Density	0.362073			Tissue: Avg CYRI-B Optical Density	0.356267			Tissue: Avg CYRI-B Optical Density	0.389732			Tissue: Avg CYRI-B Optical Density	0.38382			Tissue: Avg CYRI-B Optical Density	0.382959			Tissue: Avg CYRI-B Optical Density	0.365802
	Tissue: Avg CYRI-B Copies Per μm²	0.149488			Tissue: Avg CYRI-B Copies Per μm²	0.11433			Tissue: Avg CYRI-B Copies Per μm²	0.13468			Tissue: Avg CYRI-B Copies Per μm²	0.193172			Tissue: Avg CYRI-B Copies Per μm²	0.141149			Tissue: Avg CYRI-B Copies Per μm²	0.125326			Tissue: Avg CYRI-B Copies Per μm²	0.097955

## Sheet: 6 week
	6weeks
	BAJD35.1j
	Name	Value			Name	Value			Name	Value			Name	Value			Name	Value			Name	Value			Name	Value
	Classified Area (mm²)	0.44673			Classified Area (mm²)	0.41929			Classified Area (mm²)	0.45555			Classified Area (mm²)	0.5648			Classified Area (mm²)	0.4247			Classified Area (mm²)	0.39933			Classified Area (mm²)	0.8495
	empty Area (mm²)	0.00474			empty Area (mm²)	0.00096			empty Area (mm²)	0			empty Area (mm²)	0.00214			empty Area (mm²)	0			empty Area (mm²)	0			empty Area (mm²)	0
	Tissue Area (mm²)	0.44199			Tissue Area (mm²)	0.41833			Tissue Area (mm²)	0.45555			Tissue Area (mm²)	0.56266			Tissue Area (mm²)	0.4247			Tissue Area (mm²)	0.39933			Tissue Area (mm²)	0.8495
	Total Tissue Area (μm²)	441882			Total Tissue Area (μm²)	418134			Total Tissue Area (μm²)	455286			Total Tissue Area (μm²)	562474			Total Tissue Area (μm²)	424382			Total Tissue Area (μm²)	398792			Total Tissue Area (μm²)	849192
	Total CYRI-B Copies	1107			Total CYRI-B Copies	859			Total CYRI-B Copies	704			Total CYRI-B Copies	1067			Total CYRI-B Copies	797			Total CYRI-B Copies	654			Total CYRI-B Copies	1634
	Total CYRI-B Area (μm²)	276.75			Total CYRI-B Area (μm²)	214.75			Total CYRI-B Area (μm²)	176			Total CYRI-B Area (μm²)	266.75			Total CYRI-B Area (μm²)	199.25			Total CYRI-B Area (μm²)	163.5			Total CYRI-B Area (μm²)	408.5
	Avg CYRI-B Optical Density	0.309996			Avg CYRI-B Optical Density	0.267429			Avg CYRI-B Optical Density	0.267614			Avg CYRI-B Optical Density	0.252			Avg CYRI-B Optical Density	0.262924			Avg CYRI-B Optical Density	0.26306			Avg CYRI-B Optical Density	0.254276
	Avg CYRI-B Copies Per μm²	0.002505	0.2505		Avg CYRI-B Copies Per μm²	0.002054	0.2054		Avg CYRI-B Copies Per μm²	0.001546	0.1546		Avg CYRI-B Copies Per μm²	0.001897	0.1897		Avg CYRI-B Copies Per μm²	0.001878	0.1878		Avg CYRI-B Copies Per μm²	0.00164	0.164		Avg CYRI-B Copies Per μm²	0.001924	0.1924		0.192057
	Tissue: Total Tissue Area (μm²)	441882			Tissue: Total Tissue Area (μm²)	418134			Tissue: Total Tissue Area (μm²)	455286			Tissue: Total Tissue Area (μm²)	562474			Tissue: Total Tissue Area (μm²)	424382			Tissue: Total Tissue Area (μm²)	398792			Tissue: Total Tissue Area (μm²)	849192
	Tissue: Total CYRI-B Copies	1107			Tissue: Total CYRI-B Copies	859			Tissue: Total CYRI-B Copies	704			Tissue: Total CYRI-B Copies	1067			Tissue: Total CYRI-B Copies	797			Tissue: Total CYRI-B Copies	654			Tissue: Total CYRI-B Copies	1634
	Tissue: Total CYRI-B Area (μm²)	276.75			Tissue: Total CYRI-B Area (μm²)	214.75			Tissue: Total CYRI-B Area (μm²)	176			Tissue: Total CYRI-B Area (μm²)	266.75			Tissue: Total CYRI-B Area (μm²)	199.25			Tissue: Total CYRI-B Area (μm²)	163.5			Tissue: Total CYRI-B Area (μm²)	408.5
	Tissue: Avg CYRI-B Optical Density	0.309996			Tissue: Avg CYRI-B Optical Density	0.267429			Tissue: Avg CYRI-B Optical Density	0.267614			Tissue: Avg CYRI-B Optical Density	0.252			Tissue: Avg CYRI-B Optical Density	0.262924			Tissue: Avg CYRI-B Optical Density	0.26306			Tissue: Avg CYRI-B Optical Density	0.254276
	Tissue: Avg CYRI-B Copies Per μm²	0.002505			Tissue: Avg CYRI-B Copies Per μm²	0.002054			Tissue: Avg CYRI-B Copies Per μm²	0.001546			Tissue: Avg CYRI-B Copies Per μm²	0.001897			Tissue: Avg CYRI-B Copies Per μm²	0.001878			Tissue: Avg CYRI-B Copies Per μm²	0.00164			Tissue: Avg CYRI-B Copies Per μm²	0.001924
	BAJD14.1a
	Name	Value			Name	Value			Name	Value			Name	Value			Name	Value			Name	Value			Name	Value
	Classified Area (mm²)	2.46979			Classified Area (mm²)	0.74536			Classified Area (mm²)	1.05701			Classified Area (mm²)	1.59774			Classified Area (mm²)	0.59632			Classified Area (mm²)	0.51391			Classified Area (mm²)	0.52915
	empty Area (mm²)	0.00729			empty Area (mm²)	0.00144			empty Area (mm²)	5e-05			empty Area (mm²)	0.00072			empty Area (mm²)	0.00622			empty Area (mm²)	0.00337			empty Area (mm²)	0
	Tissue Area (mm²)	2.4625			Tissue Area (mm²)	0.74393			Tissue Area (mm²)	1.05696			Tissue Area (mm²)	1.59702			Tissue Area (mm²)	0.59011			Tissue Area (mm²)	0.51054			Tissue Area (mm²)	0.52915
	Total Tissue Area (μm²)	2.46142e+06			Total Tissue Area (μm²)	743238			Total Tissue Area (μm²)	1056178			Total Tissue Area (μm²)	1.59599e+06			Total Tissue Area (μm²)	590022			Total Tissue Area (μm²)	510455			Total Tissue Area (μm²)	528973
	Total CYRI-B Copies	2271			Total CYRI-B Copies	314			Total CYRI-B Copies	539			Total CYRI-B Copies	1468			Total CYRI-B Copies	1183			Total CYRI-B Copies	825			Total CYRI-B Copies	526
	Total CYRI-B Area (μm²)	567.75			Total CYRI-B Area (μm²)	78.5			Total CYRI-B Area (μm²)	134.75			Total CYRI-B Area (μm²)	367			Total CYRI-B Area (μm²)	295.75			Total CYRI-B Area (μm²)	206.25			Total CYRI-B Area (μm²)	131.5
	Avg CYRI-B Optical Density	0.24226			Avg CYRI-B Optical Density	0.226934			Avg CYRI-B Optical Density	0.226254			Avg CYRI-B Optical Density	0.256024			Avg CYRI-B Optical Density	0.242767			Avg CYRI-B Optical Density	0.249201			Avg CYRI-B Optical Density	0.287569
	Avg CYRI-B Copies Per μm²	0.000923	0.0923		Avg CYRI-B Copies Per μm²	0.000422	0.0422		Avg CYRI-B Copies Per μm²	0.00051	0.051		Avg CYRI-B Copies Per μm²	0.00092	0.092		Avg CYRI-B Copies Per μm²	0.002005	0.2005		Avg CYRI-B Copies Per μm²	0.001616	0.1616		Avg CYRI-B Copies Per μm²	0.000994	0.0994		0.105571
	Tissue: Total Tissue Area (μm²)	2.46142e+06			Tissue: Total Tissue Area (μm²)	743238			Tissue: Total Tissue Area (μm²)	1056178			Tissue: Total Tissue Area (μm²)	1.59599e+06			Tissue: Total Tissue Area (μm²)	590022			Tissue: Total Tissue Area (μm²)	510455			Tissue: Total Tissue Area (μm²)	528973
	Tissue: Total CYRI-B Copies	2271			Tissue: Total CYRI-B Copies	314			Tissue: Total CYRI-B Copies	539			Tissue: Total CYRI-B Copies	1468			Tissue: Total CYRI-B Copies	1183			Tissue: Total CYRI-B Copies	825			Tissue: Total CYRI-B Copies	526
	Tissue: Total CYRI-B Area (μm²)	567.75			Tissue: Total CYRI-B Area (μm²)	78.5			Tissue: Total CYRI-B Area (μm²)	134.75			Tissue: Total CYRI-B Area (μm²)	367			Tissue: Total CYRI-B Area (μm²)	295.75			Tissue: Total CYRI-B Area (μm²)	206.25			Tissue: Total CYRI-B Area (μm²)	131.5
	Tissue: Avg CYRI-B Optical Density	0.24226			Tissue: Avg CYRI-B Optical Density	0.226934			Tissue: Avg CYRI-B Optical Density	0.226254			Tissue: Avg CYRI-B Optical Density	0.256024			Tissue: Avg CYRI-B Optical Density	0.242767			Tissue: Avg CYRI-B Optical Density	0.249201			Tissue: Avg CYRI-B Optical Density	0.287569
	Tissue: Avg CYRI-B Copies Per μm²	0.000923			Tissue: Avg CYRI-B Copies Per μm²	0.000422			Tissue: Avg CYRI-B Copies Per μm²	0.00051			Tissue: Avg CYRI-B Copies Per μm²	0.00092			Tissue: Avg CYRI-B Copies Per μm²	0.002005			Tissue: Avg CYRI-B Copies Per μm²	0.001616			Tissue: Avg CYRI-B Copies Per μm²	0.000994
	BAJD97.1a	6 weeks
	Name	Value				Name	Value			Name	Value			Name	Value			Name	Value			Name	Value			Name	Value
	Classified Area (mm²)	0.42485				Classified Area (mm²)	0.40336			Classified Area (mm²)	0.40096			Classified Area (mm²)	0.58172			Classified Area (mm²)	0.45804			Classified Area (mm²)	0.51716			Classified Area (mm²)	0.61772
	empty Area (mm²)	0				empty Area (mm²)	0			empty Area (mm²)	0.001			empty Area (mm²)	0			empty Area (mm²)	0			empty Area (mm²)	0.00067			empty Area (mm²)	0
	Tissue Area (mm²)	0.42485				Tissue Area (mm²)	0.40336			Tissue Area (mm²)	0.39996			Tissue Area (mm²)	0.58172			Tissue Area (mm²)	0.45804			Tissue Area (mm²)	0.51649			Tissue Area (mm²)	0.61772
	Total Tissue Area (μm²)	424568				Total Tissue Area (μm²)	403036			Total Tissue Area (μm²)	399775			Total Tissue Area (μm²)	581365			Total Tissue Area (μm²)	457867			Total Tissue Area (μm²)	516215			Total Tissue Area (μm²)	617327
	Total CYRI-B Copies	1864				Total CYRI-B Copies	1501			Total CYRI-B Copies	1574			Total CYRI-B Copies	1718			Total CYRI-B Copies	881			Total CYRI-B Copies	1189			Total CYRI-B Copies	1172
	Total CYRI-B Area (μm²)	466				Total CYRI-B Area (μm²)	375.25			Total CYRI-B Area (μm²)	393.5			Total CYRI-B Area (μm²)	429.5			Total CYRI-B Area (μm²)	220.25			Total CYRI-B Area (μm²)	297.25			Total CYRI-B Area (μm²)	293
	Avg CYRI-B Optical Density	0.267612				Avg CYRI-B Optical Density	0.269444			Avg CYRI-B Optical Density	0.26657			Avg CYRI-B Optical Density	0.270385			Avg CYRI-B Optical Density	0.273171			Avg CYRI-B Optical Density	0.25136			Avg CYRI-B Optical Density	0.287396
	Avg CYRI-B Copies Per μm²	0.00439		0.439		Avg CYRI-B Copies Per μm²	0.003724	0.3724		Avg CYRI-B Copies Per μm²	0.003937	0.3937		Avg CYRI-B Copies Per μm²	0.002955	0.2955		Avg CYRI-B Copies Per μm²	0.001924	0.1924		Avg CYRI-B Copies Per μm²	0.002303	0.2303		Avg CYRI-B Copies Per μm²	0.001899	0.1899		0.301886
	Tissue: Total Tissue Area (μm²)	424568				Tissue: Total Tissue Area (μm²)	403036			Tissue: Total Tissue Area (μm²)	399775			Tissue: Total Tissue Area (μm²)	581365			Tissue: Total Tissue Area (μm²)	457867			Tissue: Total Tissue Area (μm²)	516215			Tissue: Total Tissue Area (μm²)	617327
	Tissue: Total CYRI-B Copies	1864				Tissue: Total CYRI-B Copies	1501			Tissue: Total CYRI-B Copies	1574			Tissue: Total CYRI-B Copies	1718			Tissue: Total CYRI-B Copies	881			Tissue: Total CYRI-B Copies	1189			Tissue: Total CYRI-B Copies	1172
	Tissue: Total CYRI-B Area (μm²)	466				Tissue: Total CYRI-B Area (μm²)	375.25			Tissue: Total CYRI-B Area (μm²)	393.5			Tissue: Total CYRI-B Area (μm²)	429.5			Tissue: Total CYRI-B Area (μm²)	220.25			Tissue: Total CYRI-B Area (μm²)	297.25			Tissue: Total CYRI-B Area (μm²)	293
	Tissue: Avg CYRI-B Optical Density	0.267612				Tissue: Avg CYRI-B Optical Density	0.269444			Tissue: Avg CYRI-B Optical Density	0.26657			Tissue: Avg CYRI-B Optical Density	0.270385			Tissue: Avg CYRI-B Optical Density	0.273171			Tissue: Avg CYRI-B Optical Density	0.25136			Tissue: Avg CYRI-B Optical Density	0.287396
	Tissue: Avg CYRI-B Copies Per μm²	0.00439				Tissue: Avg CYRI-B Copies Per μm²	0.003724			Tissue: Avg CYRI-B Copies Per μm²	0.003937			Tissue: Avg CYRI-B Copies Per μm²	0.002955			Tissue: Avg CYRI-B Copies Per μm²	0.001924			Tissue: Avg CYRI-B Copies Per μm²	0.002303			Tissue: Avg CYRI-B Copies Per μm²	0.001899
