# Supplementary material for: CYRI-B-mediated macropinocytosis drives metastasis via lysophosphatidic acid receptor uptake
Source: eLife journal article supplement (doi:10.7554/elife.83712), 2024-05-07
Supplement: fig2-data1 [file Figure 2- source data 1 Excel 2C.xlsx]

## Sheet: Sheet1
0	BSNA7.2d WT							1	BSNA 9.1d HOM
	Name	Value							Name	Value
	Classified Area (mm²)	305.994		271.915	0.803429	0.106971	10.6971		Classified Area (mm²)	217.27		143.071	0.659011	0.0232242	2.32242
	Tumor Area (mm²)	218.464							Tumor Area (mm²)	94.2857
	Necrosis Area (mm²)	52.2244							Necrosis Area (mm²)	48.7776
	Normal Area (mm²)	1.2261							Normal Area (mm²)	0.00817
	Empty Area (mm²)	34.0793							Empty Area (mm²)	74.199
	Total Tissue Area (μm²)	219802864							Total Tissue Area (μm²)	59097800
	Total CYRI-B Copies	18890658							Total CYRI-B Copies	904463
	Total CYRI-B Area (μm²)	4.77951e+06							Total CYRI-B Area (μm²)	228837
	Avg CYRI-B Optical Density	0.183174							Avg CYRI-B Optical Density	0.15447
	Avg CYRI-B Copies Per μm²	0.085944							Avg CYRI-B Copies Per μm²	0.015305
	Tumor: Total Tissue Area (μm²)	219802864							Tumor: Total Tissue Area (μm²)	59097800
	Tumor: Total CYRI-B Copies	18890658							Tumor: Total CYRI-B Copies	904463
	Tumor: Total CYRI-B Area (μm²)	4.77951e+06							Tumor: Total CYRI-B Area (μm²)	228837
	Tumor: Avg CYRI-B Optical Density	0.183174							Tumor: Avg CYRI-B Optical Density	0.15447
	Tumor: Avg CYRI-B Copies Per μm²	0.085944		8.5944					Tumor: Avg CYRI-B Copies Per μm²	0.015305		1.5305
2	BSNA5.2c wt							3	BSNA1.2a wt
	Name	Value							Name	Value
	Classified Area (mm²)	207.499		182.815	0.889666	0.0378119	3.78119		Classified Area (mm²)	160.03		147.643	0.929586	0.0326533	3.26533
	Tumor Area (mm²)	162.645							Tumor Area (mm²)	137.247
	Necrosis Area (mm²)	18.4264							Necrosis Area (mm²)	7.99498
	Normal Area (mm²)	1.74432							Normal Area (mm²)	2.40118
	Empty Area (mm²)	24.6838							Empty Area (mm²)	12.3877
	Total Tissue Area (μm²)	161200480							Total Tissue Area (μm²)	136742464
	Total CYRI-B Copies	5422840							Total CYRI-B Copies	4150707
	Total CYRI-B Area (μm²)	1.37203e+06							Total CYRI-B Area (μm²)	1.05017e+06
	Avg CYRI-B Optical Density	0.168625							Avg CYRI-B Optical Density	0.143204
	Avg CYRI-B Copies Per μm²	0.03364							Avg CYRI-B Copies Per μm²	0.030354
	Tumor: Total Tissue Area (μm²)	161200480							Tumor: Total Tissue Area (μm²)	136742464
	Tumor: Total CYRI-B Copies	5422840							Tumor: Total CYRI-B Copies	4150707
	Tumor: Total CYRI-B Area (μm²)	1.37203e+06							Tumor: Total CYRI-B Area (μm²)	1.05017e+06
	Tumor: Avg CYRI-B Optical Density	0.168625							Tumor: Avg CYRI-B Optical Density	0.143204
	Tumor: Avg CYRI-B Copies Per μm²	0.03364		3.364					Tumor: Avg CYRI-B Copies Per μm²	0.030354		3.0354
4	BSNA7.2g WT							5	BSNA11.1f HOM
	Name	Value							Name	Value
	Classified Area (mm²)	263.89		234.3	0.87495	0.130418	13.0418		Classified Area (mm²)	139.986		112.849	0.90552	0.00210929	0.210929
	Tumor Area (mm²)	205.001							Tumor Area (mm²)	102.187
	Necrosis Area (mm²)	28.8599							Necrosis Area (mm²)	7.57623
	Normal Area (mm²)	0.43932							Normal Area (mm²)	3.0858
	Empty Area (mm²)	29.5901							Empty Area (mm²)	27.1361
	Total Tissue Area (μm²)	203386464							Total Tissue Area (μm²)	93184832
	Total CYRI-B Copies	23208271							Total CYRI-B Copies	178017
	Total CYRI-B Area (μm²)	5.8719e+06							Total CYRI-B Area (μm²)	45039.9
	Avg CYRI-B Optical Density	0.166845							Avg CYRI-B Optical Density	0.136984
	Avg CYRI-B Copies Per μm²	0.114109							Avg CYRI-B Copies Per μm²	0.00191
	Tumor: Total Tissue Area (μm²)	203386464							Tumor: Total Tissue Area (μm²)	93184832
	Tumor: Total CYRI-B Copies	23208271							Tumor: Total CYRI-B Copies	178017
	Tumor: Total CYRI-B Area (μm²)	5.8719e+06							Tumor: Total CYRI-B Area (μm²)	45039.9
	Tumor: Avg CYRI-B Optical Density	0.166845							Tumor: Avg CYRI-B Optical Density	0.136984
	Tumor: Avg CYRI-B Copies Per μm²	0.114109		11.4109					Tumor: Avg CYRI-B Copies Per μm²	0.00191		0.191
6	BSNA12.1a HOM							7	BSNA15.1a HOM
	Name	Value							Name	Value
	Classified Area (mm²)	225.391		192.564	0.827973	0.014451	1.4451		Classified Area (mm²)	119.764		105.346	0.789713	0.00511705	0.511705
	Tumor Area (mm²)	159.438							Tumor Area (mm²)	83.1934
	Necrosis Area (mm²)	31.4532							Necrosis Area (mm²)	19.4735
	Normal Area (mm²)	1.67308							Normal Area (mm²)	2.67943
	Empty Area (mm²)	32.8265							Empty Area (mm²)	14.418
	Total Tissue Area (μm²)	157478672							Total Tissue Area (μm²)	80253512
	Total CYRI-B Copies	1884193							Total CYRI-B Copies	324282
	Total CYRI-B Area (μm²)	476718							Total CYRI-B Area (μm²)	82046.3
	Avg CYRI-B Optical Density	0.148761							Avg CYRI-B Optical Density	0.152498
	Avg CYRI-B Copies Per μm²	0.011965							Avg CYRI-B Copies Per μm²	0.004041
	Tumor: Total Tissue Area (μm²)	157478672							Tumor: Total Tissue Area (μm²)	80253512
	Tumor: Total CYRI-B Copies	1884193							Tumor: Total CYRI-B Copies	324282
	Tumor: Total CYRI-B Area (μm²)	476718							Tumor: Total CYRI-B Area (μm²)	82046.3
	Tumor: Avg CYRI-B Optical Density	0.148761							Tumor: Avg CYRI-B Optical Density	0.152498
	Tumor: Avg CYRI-B Copies Per μm²	0.011965		1.1965					Tumor: Avg CYRI-B Copies Per μm²	0.004041		0.4041
