# Supplementary material for: CYRI-B-mediated macropinocytosis drives metastasis via lysophosphatidic acid receptor uptake
Source: eLife journal article supplement (doi:10.7554/elife.83712), 2024-05-07
Supplement: fig2-data4 [file Figure 2- source data 4 Excel 2F.xlsx]

## Sheet: Sheet1
WT-Het-Het
	Mouse I.D.		Mouse Weight	PDAC weight (g)	Invasion to proximal intestines	Mets in liver	Mets in lungs	Mets in diaphragm	Mets in intestine	Mets in mesentery	Gallblader Invasion	Intraperitoneal cavity	Ascitis	Body mass/PDAC
	BSNA1.2a		25.02	1.18	Y	Y	N	N	n	N			n	0.0471623
	BSNA7.2d		28.1	1.8	Y	Y	N	N	N	N			n	0.0640569
	BSNA7.2g		31.6	3.5	y	Y (micromets)	maybe	y	y	y			y	0.110759
	BSNA5.2c		28.2	1.6	y	Y (micromets)	N	N	N	N			n	0.0567376
	BSNA35.1a		27	1.44	Y	Y	maybe	N	N	N			n	0.0533333
	BSNA39.1c		27.5	2.2	Y	N	N	N	N	N			n	0.08
	BAJF91.1a		24.58	1.08	y	N	N	N	N	N			n	0.0439382
	BAJF107.2b		24.78	2.6	Y	Y	N	N	N	N			n	0.104923
	BSNA39.1f		22.45	1.46	y	N	N	N	N	N			n	0.0650334
	BSNA14.1g		22.3	1.5	Y	y	Maybe	y	Maybe				y	0.0672646
	BSNA43.2d		25.8	1.9	Y	Y	maybe	n					Y	0.0736434
	BSNA32.5b		27.3	1.76	y	N	N	N	N	N			n	0.0644689
	BSNA41.2d		23.72	2.7	y	y	n	n	n	n	n		y	0.113828
	BSNA31.2a		30.9	2.8	y	y	n	n	n	n	n	n	y	0.0906149
	BAJF108.1f		31.8	1.7	y	y (2x)	n	Y (4x)	n	n	n	maybe	y	0.0534591
	BSNA35.1c		30.7	1.96	y	N	N	maybe	n	n	n	n	a bit	0.0638436
	BSNA35.1g		17.9	0.94	y	N	N	N	N	N	N	maybe	N	0.052514
	BSNA34.2c		26.7	0.9	y	n	n	n	n	n	n	n	a bit	0.0337079
	BSNA36.1d		20.9	0.83	y	y	n	n	maybe	n	n	n	Y	0.0397129
	BSNA41.1a		28.03	1.23	y	y (one small spot)	y	y	n	n	n	n	y	0.0438816
	BSNA43.3c		31.6	1.26	y	y (one small spot)	n	n	n	n	n	n	y	0.0398734
Hom-Het-Het
	Mouse I.D.		Mouse Weight	PDAC weight (g)	Invasion to proximal intestines	Mets in liver	Mets in lungs	Mets in diaphragm	Mets in intestine	Mets in mesentery	Gallblader Invasion	Intraperitoneal cavity	Ascitis
	BSNA9.1d		25.9	2	Y	N	N	N	N	N	Y	Y (2x)	n	0.0772201
	BSNA12.1a		25	1.98	N	N	N	N	Y (5x)	N	N	N	n	0.0792
	BSNA13.1b		29.1	2.4	Y	Y micromets	N	N	N	n	N	N	n	0.0824742
	BSNA15.1a		29.98	1.89	Y	N	N	N	N	N	N	N	n	0.063042
	BSNA11.1f		30.5	1.67	Y	N	0	0	N	N	N	N	n	0.0547541
	BSNA11.1g		26.12	3	No	No	No	No	No	No	No	No	n	0.114855
	BSNA9.4a		22.88	2.3	Y	N	Y	0	N	N	N	N	n	0.100524
	BSNA9.4d		32.18	2.08	Y	N	N	N	N	N	N	N	n	0.0646364
	BSNA19.1b		31.6	1.54	Y	Y (1X)	N	N	N	N	N	N	n	0.0487342
	BSNA10.4d		16.19	1.69	Y	Y (1-2)	N	Y (1x)	N	N	N	N	y	0.104385
	BSNA24.1d		33.27	1.43	Y	N	N	N	N	N	N	N	n	0.0429817
	BSNA11.3a		26.24	1.59	Y	Y	Y	N	N	N	N	N	y	0.0605945
	BSNA31.2c		22.09	0.92	Y	N	N	N	N	N	N	N	n	0.0416478
	BSNA8.2c		24.59	0.8	No	N	N	N	N	N	N	N	n	0.0325336
	BSNA8.1f		22.4	0.72	Y	N	N	N	N	N	N	N	n	0.0321429
	BSNA34.2i		32.4	1.24	No	N	N	N	N	N	N	Y (1x)	Y	0.0382716
	BSNA58.1d		24.68	1	Y	N	N	N	N	N	NN	N	N	0.0405186
	BSNA60.1d		26.11	2.2	Y	N	N	N	N	N	N	N	y a bit	0.0842589
	BSNA56.1g		24	1.36	Y	Y	N	Y (1x)	N	N	N		Y	0.0566667
	BSNA64.1h		20.5	1.46	Y	N	N	N	N	N	N	N	N	0.0712195
	BSNA37.2b		30	1.05	y	n	n	n	n	n	n	n	n	0.035
Het-Het-Het
	Mouse I.D.		Mouse Weight	PDAC weight (g)	Invasion to proximal intestines	Mets in liver	Mets in lungs	Mets in diaphragm	Mets in intestine	Mets in mesentery	Gallblader Invasion	Intraperitoneal cavity	Ascitis
	BSNA3.1c		28.9	1.93	y	maybe	N	N	N	N	N	N	N	0.066782
	BSNA1.2d		28.1	2.82	y	N	N	N	N	N	N	N	N	0.100356
	BSNA5.1b		29.1	1.45	y	y	N	N	N	N	N	N	N	0.0498282
	BSNA5.1c		27.9	1.42	y	n	N	y	N	N	N	N	N	0.0508961
	BSNA32.1a		31.42	2.41	y	N	N	N	N	N	N	N	N	0.0767027
	BSNA32.2d		28.3	2	y	n	maybe	y	n	N	N	N	y	0.0706714
	BSNA31.3a		31.5	0.7	y	maybe	y	N	N	N	N	N	N	0.0222222
	BSNA31.3b		25	0.83	Y	n	n	n	n	n	n	n	n	0.0332
	BSNA2.2b		26.2	0.97	y	maybe	n	Y	Y	Y	n	n	n	0.0370229
	BSNA10.1k		32.02	3.1	y	n	n	n	n	n	n	n	n	0.0968145
	BSNA2.3h		28.3	3.2	y	y	maybe	n	n	y	n	n	n	0.113074
	BSNa52.2b		23.81	1.95	y	n	n	y	y	n	n	n	n	0.0818984
