# Supplementary material for: CYRI-B-mediated macropinocytosis drives metastasis via lysophosphatidic acid receptor uptake
Source: eLife journal article supplement (doi:10.7554/elife.83712), 2024-05-07
Supplement: fig2-figsupp1-data1 [file Figure 2- figure supplement 1- source data 1 Excel B.xlsx]

## Sheet: Sheet1
		BSNA15.1a	HOM
		Layer 1			Layer2			Layer 3			Layer4			Layer 5			Layer6			Layer 7			Layer8
		Name	Value		Name	Value		Name	Value		Name	Value		Name	Value		Name	Value		Name	Value		Name	Value
		Classified Area (mm²)	0.69946		Classified Area (mm²)	0.45298		Classified Area (mm²)	1.30499		Classified Area (mm²)	0.73567		Classified Area (mm²)	0.5927		Classified Area (mm²)	0.63986		Classified Area (mm²)	0.75594		Classified Area (mm²)	1.10777
		tumour Area (mm²)	0.68897		tumour Area (mm²)	0.45298		tumour Area (mm²)	1.3043		tumour Area (mm²)	0.7322		tumour Area (mm²)	0.5927		tumour Area (mm²)	0.635		tumour Area (mm²)	0.75521		tumour Area (mm²)	1.0951
		empty Area (mm²)	0.01049		empty Area (mm²)	0		empty Area (mm²)	0.00061		empty Area (mm²)	0.00195		empty Area (mm²)	0		empty Area (mm²)	0		empty Area (mm²)	0		empty Area (mm²)	0.00202
		necrosis Area (mm²)	0		necrosis Area (mm²)	0		necrosis Area (mm²)	0		necrosis Area (mm²)	0		necrosis Area (mm²)	0		necrosis Area (mm²)	0		necrosis Area (mm²)	0		necrosis Area (mm²)	0
		normal Area (mm²)	0		normal Area (mm²)	0		normal Area (mm²)	8e-05		normal Area (mm²)	0.00152		normal Area (mm²)	0		normal Area (mm²)	0.00486		normal Area (mm²)	0.00073		normal Area (mm²)	0.01064
		Total Cells	3048		Total Cells	2371		Total Cells	5277		Total Cells	3764		Total Cells	3038		Total Cells	2821		Total Cells	4233		Total Cells	5153
		Stain 1 Positive Cells	2502		Stain 1 Positive Cells	1779		Stain 1 Positive Cells	3614		Stain 1 Positive Cells	3013		Stain 1 Positive Cells	2635		Stain 1 Positive Cells	1553		Stain 1 Positive Cells	3244		Stain 1 Positive Cells	3748
		Stain 1 0+ Cells	546		Stain 1 0+ Cells	592		Stain 1 0+ Cells	1663		Stain 1 0+ Cells	751		Stain 1 0+ Cells	403		Stain 1 0+ Cells	1268		Stain 1 0+ Cells	989		Stain 1 0+ Cells	1405
		Stain 1 1+ Cells	640		Stain 1 1+ Cells	381		Stain 1 1+ Cells	696		Stain 1 1+ Cells	650		Stain 1 1+ Cells	630		Stain 1 1+ Cells	344		Stain 1 1+ Cells	498		Stain 1 1+ Cells	1355
		Stain 1 2+ Cells	1281		Stain 1 2+ Cells	858		Stain 1 2+ Cells	1614		Stain 1 2+ Cells	1601		Stain 1 2+ Cells	1728		Stain 1 2+ Cells	585		Stain 1 2+ Cells	1666		Stain 1 2+ Cells	2035
		Stain 1 3+ Cells	581		Stain 1 3+ Cells	540		Stain 1 3+ Cells	1304		Stain 1 3+ Cells	762		Stain 1 3+ Cells	277		Stain 1 3+ Cells	624		Stain 1 3+ Cells	1080		Stain 1 3+ Cells	358
		Stain 2 Positive Cells	0		Stain 2 Positive Cells	0		Stain 2 Positive Cells	0		Stain 2 Positive Cells	0		Stain 2 Positive Cells	0		Stain 2 Positive Cells	0		Stain 2 Positive Cells	0		Stain 2 Positive Cells	0
		Stain 2 0+ Cells	3048		Stain 2 0+ Cells	2371		Stain 2 0+ Cells	5277		Stain 2 0+ Cells	3764		Stain 2 0+ Cells	3038		Stain 2 0+ Cells	2821		Stain 2 0+ Cells	4233		Stain 2 0+ Cells	5153
		Stain 2 1+ Cells	0		Stain 2 1+ Cells	0		Stain 2 1+ Cells	0		Stain 2 1+ Cells	0		Stain 2 1+ Cells	0		Stain 2 1+ Cells	0		Stain 2 1+ Cells	0		Stain 2 1+ Cells	0
		Stain 2 2+ Cells	0		Stain 2 2+ Cells	0		Stain 2 2+ Cells	0		Stain 2 2+ Cells	0		Stain 2 2+ Cells	0		Stain 2 2+ Cells	0		Stain 2 2+ Cells	0		Stain 2 2+ Cells	0
		Stain 2 3+ Cells	0		Stain 2 3+ Cells	0		Stain 2 3+ Cells	0		Stain 2 3+ Cells	0		Stain 2 3+ Cells	0		Stain 2 3+ Cells	0		Stain 2 3+ Cells	0		Stain 2 3+ Cells	0
		Dual Positive Cells	0		Dual Positive Cells	0		Dual Positive Cells	0		Dual Positive Cells	0		Dual Positive Cells	0		Dual Positive Cells	0		Dual Positive Cells	0		Dual Positive Cells	0
		Dual Negative Cells	546		Dual Negative Cells	592		Dual Negative Cells	1663		Dual Negative Cells	751		Dual Negative Cells	403		Dual Negative Cells	1268		Dual Negative Cells	989		Dual Negative Cells	1405
		% Stain 1 Positive Cells	82.0866		% Stain 1 Positive Cells	75.0316		% Stain 1 Positive Cells	68.4859		% Stain 1 Positive Cells	80.0478		% Stain 1 Positive Cells	86.7347		% Stain 1 Positive Cells	55.0514		% Stain 1 Positive Cells	76.636		% Stain 1 Positive Cells	72.7343		74.601
		% Stain 1 0+ Cells	17.9134		% Stain 1 0+ Cells	24.9684		% Stain 1 0+ Cells	31.5141		% Stain 1 0+ Cells	19.9522		% Stain 1 0+ Cells	13.2653		% Stain 1 0+ Cells	44.9486		% Stain 1 0+ Cells	23.364		% Stain 1 0+ Cells	27.2657
		% Stain 1 1+ Cells	20.9974		% Stain 1 1+ Cells	16.0692		% Stain 1 1+ Cells	13.1893		% Stain 1 1+ Cells	17.2689		% Stain 1 1+ Cells	20.7373		% Stain 1 1+ Cells	12.1943		% Stain 1 1+ Cells	11.7647		% Stain 1 1+ Cells	26.2954
		% Stain 1 2+ Cells	42.0276		% Stain 1 2+ Cells	36.1873		% Stain 1 2+ Cells	30.5856		% Stain 1 2+ Cells	42.5345		% Stain 1 2+ Cells	56.8795		% Stain 1 2+ Cells	20.7373		% Stain 1 2+ Cells	39.3574		% Stain 1 2+ Cells	39.4916
		% Stain 1 3+ Cells	19.0617		% Stain 1 3+ Cells	22.7752		% Stain 1 3+ Cells	24.711		% Stain 1 3+ Cells	20.2444		% Stain 1 3+ Cells	9.11784		% Stain 1 3+ Cells	22.1198		% Stain 1 3+ Cells	25.5138		% Stain 1 3+ Cells	6.94741
		Stain 1 H-Score	162.238		Stain 1 H-Score	156.769		Stain 1 H-Score	148.493		Stain 1 H-Score	163.071		Stain 1 H-Score	161.85		Stain 1 H-Score	120.028		Stain 1 H-Score	167.021		Stain 1 H-Score	126.121
		% Stain 2 Positive Cells	0		% Stain 2 Positive Cells	0		% Stain 2 Positive Cells	0		% Stain 2 Positive Cells	0		% Stain 2 Positive Cells	0		% Stain 2 Positive Cells	0		% Stain 2 Positive Cells	0		% Stain 2 Positive Cells	0
		% Stain 2 0+ Cells	100		% Stain 2 0+ Cells	100		% Stain 2 0+ Cells	100		% Stain 2 0+ Cells	100		% Stain 2 0+ Cells	100		% Stain 2 0+ Cells	100		% Stain 2 0+ Cells	100		% Stain 2 0+ Cells	100
		% Stain 2 1+ Cells	0		% Stain 2 1+ Cells	0		% Stain 2 1+ Cells	0		% Stain 2 1+ Cells	0		% Stain 2 1+ Cells	0		% Stain 2 1+ Cells	0		% Stain 2 1+ Cells	0		% Stain 2 1+ Cells	0
		% Stain 2 2+ Cells	0		% Stain 2 2+ Cells	0		% Stain 2 2+ Cells	0		% Stain 2 2+ Cells	0		% Stain 2 2+ Cells	0		% Stain 2 2+ Cells	0		% Stain 2 2+ Cells	0		% Stain 2 2+ Cells	0
		% Stain 2 3+ Cells	0		% Stain 2 3+ Cells	0		% Stain 2 3+ Cells	0		% Stain 2 3+ Cells	0		% Stain 2 3+ Cells	0		% Stain 2 3+ Cells	0		% Stain 2 3+ Cells	0		% Stain 2 3+ Cells	0
		Stain 2 H-Score	0		Stain 2 H-Score	0		Stain 2 H-Score	0		Stain 2 H-Score	0		Stain 2 H-Score	0		Stain 2 H-Score	0		Stain 2 H-Score	0		Stain 2 H-Score	0
		% Dual Positive Cells	0		% Dual Positive Cells	0		% Dual Positive Cells	0		% Dual Positive Cells	0		% Dual Positive Cells	0		% Dual Positive Cells	0		% Dual Positive Cells	0		% Dual Positive Cells	0
		% Dual Negative Cells	17.9134		% Dual Negative Cells	24.9684		% Dual Negative Cells	31.5141		% Dual Negative Cells	19.9522		% Dual Negative Cells	13.2653		% Dual Negative Cells	44.9486		% Dual Negative Cells	23.364		% Dual Negative Cells	27.2657
		Avg Stain 1 Nuclear OD	0.353698		Avg Stain 1 Nuclear OD	0.345771		Avg Stain 1 Nuclear OD	0.333066		Avg Stain 1 Nuclear OD	0.356062		Avg Stain 1 Nuclear OD	0.336931		Avg Stain 1 Nuclear OD	0.288695		Avg Stain 1 Nuclear OD	0.374162		Avg Stain 1 Nuclear OD	0.267867
		Avg Stain 2 Nuclear OD	0.0479997		Avg Stain 2 Nuclear OD	0.0465939		Avg Stain 2 Nuclear OD	0.0522874		Avg Stain 2 Nuclear OD	0.0461432		Avg Stain 2 Nuclear OD	0.0388685		Avg Stain 2 Nuclear OD	0.0528662		Avg Stain 2 Nuclear OD	0.0511509		Avg Stain 2 Nuclear OD	0.0400832
		Avg Stain 1 Cytoplasmic OD	0.100437		Avg Stain 1 Cytoplasmic OD	0.104577		Avg Stain 1 Cytoplasmic OD	0.0866471		Avg Stain 1 Cytoplasmic OD	0.102895		Avg Stain 1 Cytoplasmic OD	0.10684		Avg Stain 1 Cytoplasmic OD	0.0745088		Avg Stain 1 Cytoplasmic OD	0.101265		Avg Stain 1 Cytoplasmic OD	0.0866601
		Avg Stain 2 Cytoplasmic OD	0.0322065		Avg Stain 2 Cytoplasmic OD	0.0321098		Avg Stain 2 Cytoplasmic OD	0.0323847		Avg Stain 2 Cytoplasmic OD	0.0322901		Avg Stain 2 Cytoplasmic OD	0.0320471		Avg Stain 2 Cytoplasmic OD	0.03255		Avg Stain 2 Cytoplasmic OD	0.0322317		Avg Stain 2 Cytoplasmic OD	0.0321745
		Avg Cell Area (µm²)	96.8685		Avg Cell Area (µm²)	98.8266		Avg Cell Area (µm²)	106.178		Avg Cell Area (µm²)	94.6683		Avg Cell Area (µm²)	95.2094		Avg Cell Area (µm²)	103.37		Avg Cell Area (µm²)	91.715		Avg Cell Area (µm²)	97.4966
		Avg Cytoplasm Area (µm²)	67.9422		Avg Cytoplasm Area (µm²)	66.4215		Avg Cytoplasm Area (µm²)	75.3945		Avg Cytoplasm Area (µm²)	65.4066		Avg Cytoplasm Area (µm²)	65.8652		Avg Cytoplasm Area (µm²)	76.3556		Avg Cytoplasm Area (µm²)	62.3796		Avg Cytoplasm Area (µm²)	71.0075
		Avg Nucleus Area (µm²)	28.9263		Avg Nucleus Area (µm²)	32.4051		Avg Nucleus Area (µm²)	30.7835		Avg Nucleus Area (µm²)	29.2617		Avg Nucleus Area (µm²)	29.3442		Avg Nucleus Area (µm²)	27.0139		Avg Nucleus Area (µm²)	29.3354		Avg Nucleus Area (µm²)	26.4891
		Avg Nucleus Perimeter (µm)	11.3876		Avg Nucleus Perimeter (µm)	12.6556		Avg Nucleus Perimeter (µm)	12.0045		Avg Nucleus Perimeter (µm)	11.5226		Avg Nucleus Perimeter (µm)	11.5932		Avg Nucleus Perimeter (µm)	10.5807		Avg Nucleus Perimeter (µm)	11.5721		Avg Nucleus Perimeter (µm)	10.4788
		Avg Nucleus Roundness	0.68536		Avg Nucleus Roundness	0.684006		Avg Nucleus Roundness	0.693685		Avg Nucleus Roundness	0.684604		Avg Nucleus Roundness	0.678913		Avg Nucleus Roundness	0.693902		Avg Nucleus Roundness	0.679763		Avg Nucleus Roundness	0.690839
		Tissue Area (µm²)	601953		Tissue Area (µm²)	452538		Tissue Area (µm²)	1240630		Tissue Area (µm²)	710361		Tissue Area (µm²)	592509		Tissue Area (µm²)	634635		Tissue Area (µm²)	753802		Tissue Area (µm²)	1076920
		tumour: Total Cells	3048		tumour: Total Cells	2371		tumour: Total Cells	5277		tumour: Total Cells	3764		tumour: Total Cells	3038		tumour: Total Cells	2821		tumour: Total Cells	4233		tumour: Total Cells	5153
		tumour: Stain 1 Positive Cells	2502		tumour: Stain 1 Positive Cells	1779		tumour: Stain 1 Positive Cells	3614		tumour: Stain 1 Positive Cells	3013		tumour: Stain 1 Positive Cells	2635		tumour: Stain 1 Positive Cells	1553		tumour: Stain 1 Positive Cells	3244		tumour: Stain 1 Positive Cells	3748
		tumour: Stain 1 0+ Cells	546		tumour: Stain 1 0+ Cells	592		tumour: Stain 1 0+ Cells	1663		tumour: Stain 1 0+ Cells	751		tumour: Stain 1 0+ Cells	403		tumour: Stain 1 0+ Cells	1268		tumour: Stain 1 0+ Cells	989		tumour: Stain 1 0+ Cells	1405
		tumour: Stain 1 1+ Cells	640		tumour: Stain 1 1+ Cells	381		tumour: Stain 1 1+ Cells	696		tumour: Stain 1 1+ Cells	650		tumour: Stain 1 1+ Cells	630		tumour: Stain 1 1+ Cells	344		tumour: Stain 1 1+ Cells	498		tumour: Stain 1 1+ Cells	1355
		tumour: Stain 1 2+ Cells	1281		tumour: Stain 1 2+ Cells	858		tumour: Stain 1 2+ Cells	1614		tumour: Stain 1 2+ Cells	1601		tumour: Stain 1 2+ Cells	1728		tumour: Stain 1 2+ Cells	585		tumour: Stain 1 2+ Cells	1666		tumour: Stain 1 2+ Cells	2035
		tumour: Stain 1 3+ Cells	581		tumour: Stain 1 3+ Cells	540		tumour: Stain 1 3+ Cells	1304		tumour: Stain 1 3+ Cells	762		tumour: Stain 1 3+ Cells	277		tumour: Stain 1 3+ Cells	624		tumour: Stain 1 3+ Cells	1080		tumour: Stain 1 3+ Cells	358
		tumour: Stain 2 Positive Cells	0		tumour: Stain 2 Positive Cells	0		tumour: Stain 2 Positive Cells	0		tumour: Stain 2 Positive Cells	0		tumour: Stain 2 Positive Cells	0		tumour: Stain 2 Positive Cells	0		tumour: Stain 2 Positive Cells	0		tumour: Stain 2 Positive Cells	0
		tumour: Stain 2 0+ Cells	3048		tumour: Stain 2 0+ Cells	2371		tumour: Stain 2 0+ Cells	5277		tumour: Stain 2 0+ Cells	3764		tumour: Stain 2 0+ Cells	3038		tumour: Stain 2 0+ Cells	2821		tumour: Stain 2 0+ Cells	4233		tumour: Stain 2 0+ Cells	5153
		tumour: Stain 2 1+ Cells	0		tumour: Stain 2 1+ Cells	0		tumour: Stain 2 1+ Cells	0		tumour: Stain 2 1+ Cells	0		tumour: Stain 2 1+ Cells	0		tumour: Stain 2 1+ Cells	0		tumour: Stain 2 1+ Cells	0		tumour: Stain 2 1+ Cells	0
		tumour: Stain 2 2+ Cells	0		tumour: Stain 2 2+ Cells	0		tumour: Stain 2 2+ Cells	0		tumour: Stain 2 2+ Cells	0		tumour: Stain 2 2+ Cells	0		tumour: Stain 2 2+ Cells	0		tumour: Stain 2 2+ Cells	0		tumour: Stain 2 2+ Cells	0
		tumour: Stain 2 3+ Cells	0		tumour: Stain 2 3+ Cells	0		tumour: Stain 2 3+ Cells	0		tumour: Stain 2 3+ Cells	0		tumour: Stain 2 3+ Cells	0		tumour: Stain 2 3+ Cells	0		tumour: Stain 2 3+ Cells	0		tumour: Stain 2 3+ Cells	0
		tumour: Dual Positive Cells	0		tumour: Dual Positive Cells	0		tumour: Dual Positive Cells	0		tumour: Dual Positive Cells	0		tumour: Dual Positive Cells	0		tumour: Dual Positive Cells	0		tumour: Dual Positive Cells	0		tumour: Dual Positive Cells	0
		tumour: Dual Negative Cells	546		tumour: Dual Negative Cells	592		tumour: Dual Negative Cells	1663		tumour: Dual Negative Cells	751		tumour: Dual Negative Cells	403		tumour: Dual Negative Cells	1268		tumour: Dual Negative Cells	989		tumour: Dual Negative Cells	1405
		tumour: % Stain 1 Positive Cells	82.0866		tumour: % Stain 1 Positive Cells	75.0316		tumour: % Stain 1 Positive Cells	68.4859		tumour: % Stain 1 Positive Cells	80.0478		tumour: % Stain 1 Positive Cells	86.7347		tumour: % Stain 1 Positive Cells	55.0514		tumour: % Stain 1 Positive Cells	76.636		tumour: % Stain 1 Positive Cells	72.7343
		tumour: % Stain 1 0+ Cells	17.9134		tumour: % Stain 1 0+ Cells	24.9684		tumour: % Stain 1 0+ Cells	31.5141		tumour: % Stain 1 0+ Cells	19.9522		tumour: % Stain 1 0+ Cells	13.2653		tumour: % Stain 1 0+ Cells	44.9486		tumour: % Stain 1 0+ Cells	23.364		tumour: % Stain 1 0+ Cells	27.2657
		tumour: % Stain 1 1+ Cells	20.9974		tumour: % Stain 1 1+ Cells	16.0692		tumour: % Stain 1 1+ Cells	13.1893		tumour: % Stain 1 1+ Cells	17.2689		tumour: % Stain 1 1+ Cells	20.7373		tumour: % Stain 1 1+ Cells	12.1943		tumour: % Stain 1 1+ Cells	11.7647		tumour: % Stain 1 1+ Cells	26.2954
		tumour: % Stain 1 2+ Cells	42.0276		tumour: % Stain 1 2+ Cells	36.1873		tumour: % Stain 1 2+ Cells	30.5856		tumour: % Stain 1 2+ Cells	42.5345		tumour: % Stain 1 2+ Cells	56.8795		tumour: % Stain 1 2+ Cells	20.7373		tumour: % Stain 1 2+ Cells	39.3574		tumour: % Stain 1 2+ Cells	39.4916
		tumour: % Stain 1 3+ Cells	19.0617		tumour: % Stain 1 3+ Cells	22.7752		tumour: % Stain 1 3+ Cells	24.711		tumour: % Stain 1 3+ Cells	20.2444		tumour: % Stain 1 3+ Cells	9.11784		tumour: % Stain 1 3+ Cells	22.1198		tumour: % Stain 1 3+ Cells	25.5138		tumour: % Stain 1 3+ Cells	6.94741
		tumour: Stain 1 H-Score	162.238		tumour: Stain 1 H-Score	156.769		tumour: Stain 1 H-Score	148.493		tumour: Stain 1 H-Score	163.071		tumour: Stain 1 H-Score	161.85		tumour: Stain 1 H-Score	120.028		tumour: Stain 1 H-Score	167.021		tumour: Stain 1 H-Score	126.121
		tumour: % Stain 2 Positive Cells	0		tumour: % Stain 2 Positive Cells	0		tumour: % Stain 2 Positive Cells	0		tumour: % Stain 2 Positive Cells	0		tumour: % Stain 2 Positive Cells	0		tumour: % Stain 2 Positive Cells	0		tumour: % Stain 2 Positive Cells	0		tumour: % Stain 2 Positive Cells	0
		tumour: % Stain 2 0+ Cells	100		tumour: % Stain 2 0+ Cells	100		tumour: % Stain 2 0+ Cells	100		tumour: % Stain 2 0+ Cells	100		tumour: % Stain 2 0+ Cells	100		tumour: % Stain 2 0+ Cells	100		tumour: % Stain 2 0+ Cells	100		tumour: % Stain 2 0+ Cells	100
		tumour: % Stain 2 1+ Cells	0		tumour: % Stain 2 1+ Cells	0		tumour: % Stain 2 1+ Cells	0		tumour: % Stain 2 1+ Cells	0		tumour: % Stain 2 1+ Cells	0		tumour: % Stain 2 1+ Cells	0		tumour: % Stain 2 1+ Cells	0		tumour: % Stain 2 1+ Cells	0
		tumour: % Stain 2 2+ Cells	0		tumour: % Stain 2 2+ Cells	0		tumour: % Stain 2 2+ Cells	0		tumour: % Stain 2 2+ Cells	0		tumour: % Stain 2 2+ Cells	0		tumour: % Stain 2 2+ Cells	0		tumour: % Stain 2 2+ Cells	0		tumour: % Stain 2 2+ Cells	0
		tumour: % Stain 2 3+ Cells	0		tumour: % Stain 2 3+ Cells	0		tumour: % Stain 2 3+ Cells	0		tumour: % Stain 2 3+ Cells	0		tumour: % Stain 2 3+ Cells	0		tumour: % Stain 2 3+ Cells	0		tumour: % Stain 2 3+ Cells	0		tumour: % Stain 2 3+ Cells	0
		tumour: Stain 2 H-Score	0		tumour: Stain 2 H-Score	0		tumour: Stain 2 H-Score	0		tumour: Stain 2 H-Score	0		tumour: Stain 2 H-Score	0		tumour: Stain 2 H-Score	0		tumour: Stain 2 H-Score	0		tumour: Stain 2 H-Score	0
		tumour: % Dual Positive Cells	0		tumour: % Dual Positive Cells	0		tumour: % Dual Positive Cells	0		tumour: % Dual Positive Cells	0		tumour: % Dual Positive Cells	0		tumour: % Dual Positive Cells	0		tumour: % Dual Positive Cells	0		tumour: % Dual Positive Cells	0
		tumour: % Dual Negative Cells	17.9134		tumour: % Dual Negative Cells	24.9684		tumour: % Dual Negative Cells	31.5141		tumour: % Dual Negative Cells	19.9522		tumour: % Dual Negative Cells	13.2653		tumour: % Dual Negative Cells	44.9486		tumour: % Dual Negative Cells	23.364		tumour: % Dual Negative Cells	27.2657
		tumour: Avg Stain 1 Nuclear OD	0.353698		tumour: Avg Stain 1 Nuclear OD	0.345771		tumour: Avg Stain 1 Nuclear OD	0.333066		tumour: Avg Stain 1 Nuclear OD	0.356062		tumour: Avg Stain 1 Nuclear OD	0.336931		tumour: Avg Stain 1 Nuclear OD	0.288695		tumour: Avg Stain 1 Nuclear OD	0.374162		tumour: Avg Stain 1 Nuclear OD	0.267867
		tumour: Avg Stain 2 Nuclear OD	0.0479997		tumour: Avg Stain 2 Nuclear OD	0.0465939		tumour: Avg Stain 2 Nuclear OD	0.0522874		tumour: Avg Stain 2 Nuclear OD	0.0461432		tumour: Avg Stain 2 Nuclear OD	0.0388685		tumour: Avg Stain 2 Nuclear OD	0.0528662		tumour: Avg Stain 2 Nuclear OD	0.0511509		tumour: Avg Stain 2 Nuclear OD	0.0400832
		tumour: Avg Stain 1 Cytoplasmic OD	0.100437		tumour: Avg Stain 1 Cytoplasmic OD	0.104577		tumour: Avg Stain 1 Cytoplasmic OD	0.0866471		tumour: Avg Stain 1 Cytoplasmic OD	0.102895		tumour: Avg Stain 1 Cytoplasmic OD	0.10684		tumour: Avg Stain 1 Cytoplasmic OD	0.0745088		tumour: Avg Stain 1 Cytoplasmic OD	0.101265		tumour: Avg Stain 1 Cytoplasmic OD	0.0866601
		tumour: Avg Stain 2 Cytoplasmic OD	0.0322065		tumour: Avg Stain 2 Cytoplasmic OD	0.0321098		tumour: Avg Stain 2 Cytoplasmic OD	0.0323847		tumour: Avg Stain 2 Cytoplasmic OD	0.0322901		tumour: Avg Stain 2 Cytoplasmic OD	0.0320471		tumour: Avg Stain 2 Cytoplasmic OD	0.03255		tumour: Avg Stain 2 Cytoplasmic OD	0.0322317		tumour: Avg Stain 2 Cytoplasmic OD	0.0321745
		tumour: Avg Cell Area (µm²)	96.8685		tumour: Avg Cell Area (µm²)	98.8266		tumour: Avg Cell Area (µm²)	106.178		tumour: Avg Cell Area (µm²)	94.6683		tumour: Avg Cell Area (µm²)	95.2094		tumour: Avg Cell Area (µm²)	103.37		tumour: Avg Cell Area (µm²)	91.715		tumour: Avg Cell Area (µm²)	97.4966
		tumour: Avg Cytoplasm Area (µm²)	67.9422		tumour: Avg Cytoplasm Area (µm²)	66.4215		tumour: Avg Cytoplasm Area (µm²)	75.3945		tumour: Avg Cytoplasm Area (µm²)	65.4066		tumour: Avg Cytoplasm Area (µm²)	65.8652		tumour: Avg Cytoplasm Area (µm²)	76.3556		tumour: Avg Cytoplasm Area (µm²)	62.3796		tumour: Avg Cytoplasm Area (µm²)	71.0075
		tumour: Avg Nucleus Area (µm²)	28.9263		tumour: Avg Nucleus Area (µm²)	32.4051		tumour: Avg Nucleus Area (µm²)	30.7835		tumour: Avg Nucleus Area (µm²)	29.2617		tumour: Avg Nucleus Area (µm²)	29.3442		tumour: Avg Nucleus Area (µm²)	27.0139		tumour: Avg Nucleus Area (µm²)	29.3354		tumour: Avg Nucleus Area (µm²)	26.4891
		tumour: Avg Nucleus Perimeter (µm)	11.3876		tumour: Avg Nucleus Perimeter (µm)	12.6556		tumour: Avg Nucleus Perimeter (µm)	12.0045		tumour: Avg Nucleus Perimeter (µm)	11.5226		tumour: Avg Nucleus Perimeter (µm)	11.5932		tumour: Avg Nucleus Perimeter (µm)	10.5807		tumour: Avg Nucleus Perimeter (µm)	11.5721		tumour: Avg Nucleus Perimeter (µm)	10.4788
		tumour: Avg Nucleus Roundness	0.68536		tumour: Avg Nucleus Roundness	0.684006		tumour: Avg Nucleus Roundness	0.693685		tumour: Avg Nucleus Roundness	0.684604		tumour: Avg Nucleus Roundness	0.678913		tumour: Avg Nucleus Roundness	0.693902		tumour: Avg Nucleus Roundness	0.679763		tumour: Avg Nucleus Roundness	0.690839
		tumour: Tissue Area (µm²)	601953		tumour: Tissue Area (µm²)	452538		tumour: Tissue Area (µm²)	1240630		tumour: Tissue Area (µm²)	710361		tumour: Tissue Area (µm²)	592509		tumour: Tissue Area (µm²)	634635		tumour: Tissue Area (µm²)	753802		tumour: Tissue Area (µm²)	1076920
		BSNA11.1g	HOM
		Name	Value		Name	Value		Name	Value		Name	Value		Name	Value		Name	Value		Name	Value		Name	Value
		Classified Area (mm²)	1.60593		Classified Area (mm²)	1.87189		Classified Area (mm²)	2.21472		Classified Area (mm²)	2.77811		Classified Area (mm²)	2.48887		Classified Area (mm²)	2.13853		Classified Area (mm²)	1.57196		Classified Area (mm²)	1.55624
		tumour Area (mm²)	1.59396		tumour Area (mm²)	1.86749		tumour Area (mm²)	2.20776		tumour Area (mm²)	2.77381		tumour Area (mm²)	2.47651		tumour Area (mm²)	2.0151		tumour Area (mm²)	1.55912		tumour Area (mm²)	1.55169
		empty Area (mm²)	0.0017		empty Area (mm²)	0		empty Area (mm²)	0.0031		empty Area (mm²)	0.00063		empty Area (mm²)	0.00015		empty Area (mm²)	0.01384		empty Area (mm²)	0.00914		empty Area (mm²)	0.00228
		necrosis Area (mm²)	0.0035		necrosis Area (mm²)	0		necrosis Area (mm²)	0.00026		necrosis Area (mm²)	0		necrosis Area (mm²)	0.00048		necrosis Area (mm²)	1e-05		necrosis Area (mm²)	0.0002		necrosis Area (mm²)	0.00068
		normal Area (mm²)	0.00678		normal Area (mm²)	0.0044		normal Area (mm²)	0.0036		normal Area (mm²)	0.00367		normal Area (mm²)	0.01173		normal Area (mm²)	0.10958		normal Area (mm²)	0.00349		normal Area (mm²)	0.0016
		Total Cells	6952		Total Cells	7616		Total Cells	9343		Total Cells	12369		Total Cells	11026		Total Cells	8870		Total Cells	6719		Total Cells	6649
		Stain 1 Positive Cells	4175		Stain 1 Positive Cells	5211		Stain 1 Positive Cells	4422		Stain 1 Positive Cells	8059		Stain 1 Positive Cells	7652		Stain 1 Positive Cells	4371		Stain 1 Positive Cells	4216		Stain 1 Positive Cells	3068
		Stain 1 0+ Cells	2777		Stain 1 0+ Cells	2405		Stain 1 0+ Cells	4921		Stain 1 0+ Cells	4310		Stain 1 0+ Cells	3374		Stain 1 0+ Cells	4499		Stain 1 0+ Cells	2503		Stain 1 0+ Cells	3581
		Stain 1 1+ Cells	1241		Stain 1 1+ Cells	1599		Stain 1 1+ Cells	1392		Stain 1 1+ Cells	2068		Stain 1 1+ Cells	2055		Stain 1 1+ Cells	1147		Stain 1 1+ Cells	988		Stain 1 1+ Cells	836
		Stain 1 2+ Cells	1777		Stain 1 2+ Cells	2061		Stain 1 2+ Cells	1651		Stain 1 2+ Cells	2867		Stain 1 2+ Cells	2931		Stain 1 2+ Cells	1701		Stain 1 2+ Cells	1645		Stain 1 2+ Cells	1054
		Stain 1 3+ Cells	1157		Stain 1 3+ Cells	1551		Stain 1 3+ Cells	1379		Stain 1 3+ Cells	3124		Stain 1 3+ Cells	2666		Stain 1 3+ Cells	1523		Stain 1 3+ Cells	1583		Stain 1 3+ Cells	1178
		Stain 2 Positive Cells	0		Stain 2 Positive Cells	0		Stain 2 Positive Cells	0		Stain 2 Positive Cells	0		Stain 2 Positive Cells	0		Stain 2 Positive Cells	0		Stain 2 Positive Cells	0		Stain 2 Positive Cells	0
		Stain 2 0+ Cells	6952		Stain 2 0+ Cells	7616		Stain 2 0+ Cells	9343		Stain 2 0+ Cells	12369		Stain 2 0+ Cells	11026		Stain 2 0+ Cells	8870		Stain 2 0+ Cells	6719		Stain 2 0+ Cells	6649
		Stain 2 1+ Cells	0		Stain 2 1+ Cells	0		Stain 2 1+ Cells	0		Stain 2 1+ Cells	0		Stain 2 1+ Cells	0		Stain 2 1+ Cells	0		Stain 2 1+ Cells	0		Stain 2 1+ Cells	0
		Stain 2 2+ Cells	0		Stain 2 2+ Cells	0		Stain 2 2+ Cells	0		Stain 2 2+ Cells	0		Stain 2 2+ Cells	0		Stain 2 2+ Cells	0		Stain 2 2+ Cells	0		Stain 2 2+ Cells	0
		Stain 2 3+ Cells	0		Stain 2 3+ Cells	0		Stain 2 3+ Cells	0		Stain 2 3+ Cells	0		Stain 2 3+ Cells	0		Stain 2 3+ Cells	0		Stain 2 3+ Cells	0		Stain 2 3+ Cells	0
		Dual Positive Cells	0		Dual Positive Cells	0		Dual Positive Cells	0		Dual Positive Cells	0		Dual Positive Cells	0		Dual Positive Cells	0		Dual Positive Cells	0		Dual Positive Cells	0
		Dual Negative Cells	2777		Dual Negative Cells	2405		Dual Negative Cells	4921		Dual Negative Cells	4310		Dual Negative Cells	3374		Dual Negative Cells	4499		Dual Negative Cells	2503		Dual Negative Cells	3581
		% Stain 1 Positive Cells	60.0547		% Stain 1 Positive Cells	68.4217		% Stain 1 Positive Cells	47.3296		% Stain 1 Positive Cells	65.1548		% Stain 1 Positive Cells	69.3996		% Stain 1 Positive Cells	49.2785		% Stain 1 Positive Cells	62.7474		% Stain 1 Positive Cells	46.1423		58.5661
		% Stain 1 0+ Cells	39.9453		% Stain 1 0+ Cells	31.5783		% Stain 1 0+ Cells	52.6704		% Stain 1 0+ Cells	34.8452		% Stain 1 0+ Cells	30.6004		% Stain 1 0+ Cells	50.7215		% Stain 1 0+ Cells	37.2526		% Stain 1 0+ Cells	53.8577
		% Stain 1 1+ Cells	17.851		% Stain 1 1+ Cells	20.9953		% Stain 1 1+ Cells	14.8989		% Stain 1 1+ Cells	16.7192		% Stain 1 1+ Cells	18.6378		% Stain 1 1+ Cells	12.9312		% Stain 1 1+ Cells	14.7046		% Stain 1 1+ Cells	12.5733
		% Stain 1 2+ Cells	25.561		% Stain 1 2+ Cells	27.0614		% Stain 1 2+ Cells	17.671		% Stain 1 2+ Cells	23.1789		% Stain 1 2+ Cells	26.5826		% Stain 1 2+ Cells	19.177		% Stain 1 2+ Cells	24.4828		% Stain 1 2+ Cells	15.852
		% Stain 1 3+ Cells	16.6427		% Stain 1 3+ Cells	20.365		% Stain 1 3+ Cells	14.7597		% Stain 1 3+ Cells	25.2567		% Stain 1 3+ Cells	24.1792		% Stain 1 3+ Cells	17.1702		% Stain 1 3+ Cells	23.5601		% Stain 1 3+ Cells	17.7169
		Stain 1 H-Score	118.901		Stain 1 H-Score	136.213		Stain 1 H-Score	94.52		Stain 1 H-Score	138.847		Stain 1 H-Score	144.341		Stain 1 H-Score	102.796		Stain 1 H-Score	134.35		Stain 1 H-Score	97.4282
		% Stain 2 Positive Cells	0		% Stain 2 Positive Cells	0		% Stain 2 Positive Cells	0		% Stain 2 Positive Cells	0		% Stain 2 Positive Cells	0		% Stain 2 Positive Cells	0		% Stain 2 Positive Cells	0		% Stain 2 Positive Cells	0
		% Stain 2 0+ Cells	100		% Stain 2 0+ Cells	100		% Stain 2 0+ Cells	100		% Stain 2 0+ Cells	100		% Stain 2 0+ Cells	100		% Stain 2 0+ Cells	100		% Stain 2 0+ Cells	100		% Stain 2 0+ Cells	100
		% Stain 2 1+ Cells	0		% Stain 2 1+ Cells	0		% Stain 2 1+ Cells	0		% Stain 2 1+ Cells	0		% Stain 2 1+ Cells	0		% Stain 2 1+ Cells	0		% Stain 2 1+ Cells	0		% Stain 2 1+ Cells	0
		% Stain 2 2+ Cells	0		% Stain 2 2+ Cells	0		% Stain 2 2+ Cells	0		% Stain 2 2+ Cells	0		% Stain 2 2+ Cells	0		% Stain 2 2+ Cells	0		% Stain 2 2+ Cells	0		% Stain 2 2+ Cells	0
		% Stain 2 3+ Cells	0		% Stain 2 3+ Cells	0		% Stain 2 3+ Cells	0		% Stain 2 3+ Cells	0		% Stain 2 3+ Cells	0		% Stain 2 3+ Cells	0		% Stain 2 3+ Cells	0		% Stain 2 3+ Cells	0
		Stain 2 H-Score	0		Stain 2 H-Score	0		Stain 2 H-Score	0		Stain 2 H-Score	0		Stain 2 H-Score	0		Stain 2 H-Score	0		Stain 2 H-Score	0		Stain 2 H-Score	0
		% Dual Positive Cells	0		% Dual Positive Cells	0		% Dual Positive Cells	0		% Dual Positive Cells	0		% Dual Positive Cells	0		% Dual Positive Cells	0		% Dual Positive Cells	0		% Dual Positive Cells	0
		% Dual Negative Cells	39.9453		% Dual Negative Cells	31.5783		% Dual Negative Cells	52.6704		% Dual Negative Cells	34.8452		% Dual Negative Cells	30.6004		% Dual Negative Cells	50.7215		% Dual Negative Cells	37.2526		% Dual Negative Cells	53.8577
		Avg Stain 1 Nuclear OD	0.27188		Avg Stain 1 Nuclear OD	0.310159		Avg Stain 1 Nuclear OD	0.225703		Avg Stain 1 Nuclear OD	0.325904		Avg Stain 1 Nuclear OD	0.331242		Avg Stain 1 Nuclear OD	0.246118		Avg Stain 1 Nuclear OD	0.313819		Avg Stain 1 Nuclear OD	0.240111
		Avg Stain 2 Nuclear OD	0.0488073		Avg Stain 2 Nuclear OD	0.0542226		Avg Stain 2 Nuclear OD	0.0455162		Avg Stain 2 Nuclear OD	0.0546776		Avg Stain 2 Nuclear OD	0.0530154		Avg Stain 2 Nuclear OD	0.0499583		Avg Stain 2 Nuclear OD	0.0547583		Avg Stain 2 Nuclear OD	0.0480301
		Avg Stain 1 Cytoplasmic OD	0.0764225		Avg Stain 1 Cytoplasmic OD	0.0815639		Avg Stain 1 Cytoplasmic OD	0.0676425		Avg Stain 1 Cytoplasmic OD	0.0858738		Avg Stain 1 Cytoplasmic OD	0.0855898		Avg Stain 1 Cytoplasmic OD	0.0686069		Avg Stain 1 Cytoplasmic OD	0.0848122		Avg Stain 1 Cytoplasmic OD	0.0741505
		Avg Stain 2 Cytoplasmic OD	0.0320236		Avg Stain 2 Cytoplasmic OD	0.0323294		Avg Stain 2 Cytoplasmic OD	0.0316885		Avg Stain 2 Cytoplasmic OD	0.0323866		Avg Stain 2 Cytoplasmic OD	0.0322673		Avg Stain 2 Cytoplasmic OD	0.032253		Avg Stain 2 Cytoplasmic OD	0.0323156		Avg Stain 2 Cytoplasmic OD	0.0319328
		Avg Cell Area (µm²)	104.329		Avg Cell Area (µm²)	110.11		Avg Cell Area (µm²)	105.41		Avg Cell Area (µm²)	104.851		Avg Cell Area (µm²)	105.654		Avg Cell Area (µm²)	101.319		Avg Cell Area (µm²)	104.207		Avg Cell Area (µm²)	108.426
		Avg Cytoplasm Area (µm²)	79.109		Avg Cytoplasm Area (µm²)	83.9978		Avg Cytoplasm Area (µm²)	80.3716		Avg Cytoplasm Area (µm²)	78.6381		Avg Cytoplasm Area (µm²)	79.4588		Avg Cytoplasm Area (µm²)	76.4589		Avg Cytoplasm Area (µm²)	76.4205		Avg Cytoplasm Area (µm²)	80.5489
		Avg Nucleus Area (µm²)	25.2199		Avg Nucleus Area (µm²)	26.1123		Avg Nucleus Area (µm²)	25.0389		Avg Nucleus Area (µm²)	26.2132		Avg Nucleus Area (µm²)	26.1952		Avg Nucleus Area (µm²)	24.8602		Avg Nucleus Area (µm²)	27.7862		Avg Nucleus Area (µm²)	27.877
		Avg Nucleus Perimeter (µm)	9.95834		Avg Nucleus Perimeter (µm)	10.2892		Avg Nucleus Perimeter (µm)	9.89203		Avg Nucleus Perimeter (µm)	10.3134		Avg Nucleus Perimeter (µm)	10.3225		Avg Nucleus Perimeter (µm)	9.81275		Avg Nucleus Perimeter (µm)	10.9179		Avg Nucleus Perimeter (µm)	10.9167
		Avg Nucleus Roundness	0.699732		Avg Nucleus Roundness	0.702503		Avg Nucleus Roundness	0.700359		Avg Nucleus Roundness	0.698785		Avg Nucleus Roundness	0.699262		Avg Nucleus Roundness	0.693813		Avg Nucleus Roundness	0.693962		Avg Nucleus Roundness	0.70018
		Tissue Area (µm²)	1579860		Tissue Area (µm²)	1868340		Tissue Area (µm²)	2182330		Tissue Area (µm²)	2764140		Tissue Area (µm²)	2472610		Tissue Area (µm²)	1967980		Tissue Area (µm²)	1527470		Tissue Area (µm²)	1542830
		tumour: Total Cells	6952		tumour: Total Cells	7616		tumour: Total Cells	9343		tumour: Total Cells	12369		tumour: Total Cells	11026		tumour: Total Cells	8870		tumour: Total Cells	6719		tumour: Total Cells	6649
		tumour: Stain 1 Positive Cells	4175		tumour: Stain 1 Positive Cells	5211		tumour: Stain 1 Positive Cells	4422		tumour: Stain 1 Positive Cells	8059		tumour: Stain 1 Positive Cells	7652		tumour: Stain 1 Positive Cells	4371		tumour: Stain 1 Positive Cells	4216		tumour: Stain 1 Positive Cells	3068
		tumour: Stain 1 0+ Cells	2777		tumour: Stain 1 0+ Cells	2405		tumour: Stain 1 0+ Cells	4921		tumour: Stain 1 0+ Cells	4310		tumour: Stain 1 0+ Cells	3374		tumour: Stain 1 0+ Cells	4499		tumour: Stain 1 0+ Cells	2503		tumour: Stain 1 0+ Cells	3581
		tumour: Stain 1 1+ Cells	1241		tumour: Stain 1 1+ Cells	1599		tumour: Stain 1 1+ Cells	1392		tumour: Stain 1 1+ Cells	2068		tumour: Stain 1 1+ Cells	2055		tumour: Stain 1 1+ Cells	1147		tumour: Stain 1 1+ Cells	988		tumour: Stain 1 1+ Cells	836
		tumour: Stain 1 2+ Cells	1777		tumour: Stain 1 2+ Cells	2061		tumour: Stain 1 2+ Cells	1651		tumour: Stain 1 2+ Cells	2867		tumour: Stain 1 2+ Cells	2931		tumour: Stain 1 2+ Cells	1701		tumour: Stain 1 2+ Cells	1645		tumour: Stain 1 2+ Cells	1054
		tumour: Stain 1 3+ Cells	1157		tumour: Stain 1 3+ Cells	1551		tumour: Stain 1 3+ Cells	1379		tumour: Stain 1 3+ Cells	3124		tumour: Stain 1 3+ Cells	2666		tumour: Stain 1 3+ Cells	1523		tumour: Stain 1 3+ Cells	1583		tumour: Stain 1 3+ Cells	1178
		tumour: Stain 2 Positive Cells	0		tumour: Stain 2 Positive Cells	0		tumour: Stain 2 Positive Cells	0		tumour: Stain 2 Positive Cells	0		tumour: Stain 2 Positive Cells	0		tumour: Stain 2 Positive Cells	0		tumour: Stain 2 Positive Cells	0		tumour: Stain 2 Positive Cells	0
		tumour: Stain 2 0+ Cells	6952		tumour: Stain 2 0+ Cells	7616		tumour: Stain 2 0+ Cells	9343		tumour: Stain 2 0+ Cells	12369		tumour: Stain 2 0+ Cells	11026		tumour: Stain 2 0+ Cells	8870		tumour: Stain 2 0+ Cells	6719		tumour: Stain 2 0+ Cells	6649
		tumour: Stain 2 1+ Cells	0		tumour: Stain 2 1+ Cells	0		tumour: Stain 2 1+ Cells	0		tumour: Stain 2 1+ Cells	0		tumour: Stain 2 1+ Cells	0		tumour: Stain 2 1+ Cells	0		tumour: Stain 2 1+ Cells	0		tumour: Stain 2 1+ Cells	0
		tumour: Stain 2 2+ Cells	0		tumour: Stain 2 2+ Cells	0		tumour: Stain 2 2+ Cells	0		tumour: Stain 2 2+ Cells	0		tumour: Stain 2 2+ Cells	0		tumour: Stain 2 2+ Cells	0		tumour: Stain 2 2+ Cells	0		tumour: Stain 2 2+ Cells	0
		tumour: Stain 2 3+ Cells	0		tumour: Stain 2 3+ Cells	0		tumour: Stain 2 3+ Cells	0		tumour: Stain 2 3+ Cells	0		tumour: Stain 2 3+ Cells	0		tumour: Stain 2 3+ Cells	0		tumour: Stain 2 3+ Cells	0		tumour: Stain 2 3+ Cells	0
		tumour: Dual Positive Cells	0		tumour: Dual Positive Cells	0		tumour: Dual Positive Cells	0		tumour: Dual Positive Cells	0		tumour: Dual Positive Cells	0		tumour: Dual Positive Cells	0		tumour: Dual Positive Cells	0		tumour: Dual Positive Cells	0
		tumour: Dual Negative Cells	2777		tumour: Dual Negative Cells	2405		tumour: Dual Negative Cells	4921		tumour: Dual Negative Cells	4310		tumour: Dual Negative Cells	3374		tumour: Dual Negative Cells	4499		tumour: Dual Negative Cells	2503		tumour: Dual Negative Cells	3581
		tumour: % Stain 1 Positive Cells	60.0547		tumour: % Stain 1 Positive Cells	68.4217		tumour: % Stain 1 Positive Cells	47.3296		tumour: % Stain 1 Positive Cells	65.1548		tumour: % Stain 1 Positive Cells	69.3996		tumour: % Stain 1 Positive Cells	49.2785		tumour: % Stain 1 Positive Cells	62.7474		tumour: % Stain 1 Positive Cells	46.1423
		tumour: % Stain 1 0+ Cells	39.9453		tumour: % Stain 1 0+ Cells	31.5783		tumour: % Stain 1 0+ Cells	52.6704		tumour: % Stain 1 0+ Cells	34.8452		tumour: % Stain 1 0+ Cells	30.6004		tumour: % Stain 1 0+ Cells	50.7215		tumour: % Stain 1 0+ Cells	37.2526		tumour: % Stain 1 0+ Cells	53.8577
		tumour: % Stain 1 1+ Cells	17.851		tumour: % Stain 1 1+ Cells	20.9953		tumour: % Stain 1 1+ Cells	14.8989		tumour: % Stain 1 1+ Cells	16.7192		tumour: % Stain 1 1+ Cells	18.6378		tumour: % Stain 1 1+ Cells	12.9312		tumour: % Stain 1 1+ Cells	14.7046		tumour: % Stain 1 1+ Cells	12.5733
		tumour: % Stain 1 2+ Cells	25.561		tumour: % Stain 1 2+ Cells	27.0614		tumour: % Stain 1 2+ Cells	17.671		tumour: % Stain 1 2+ Cells	23.1789		tumour: % Stain 1 2+ Cells	26.5826		tumour: % Stain 1 2+ Cells	19.177		tumour: % Stain 1 2+ Cells	24.4828		tumour: % Stain 1 2+ Cells	15.852
		tumour: % Stain 1 3+ Cells	16.6427		tumour: % Stain 1 3+ Cells	20.365		tumour: % Stain 1 3+ Cells	14.7597		tumour: % Stain 1 3+ Cells	25.2567		tumour: % Stain 1 3+ Cells	24.1792		tumour: % Stain 1 3+ Cells	17.1702		tumour: % Stain 1 3+ Cells	23.5601		tumour: % Stain 1 3+ Cells	17.7169
		tumour: Stain 1 H-Score	118.901		tumour: Stain 1 H-Score	136.213		tumour: Stain 1 H-Score	94.52		tumour: Stain 1 H-Score	138.847		tumour: Stain 1 H-Score	144.341		tumour: Stain 1 H-Score	102.796		tumour: Stain 1 H-Score	134.35		tumour: Stain 1 H-Score	97.4282
		tumour: % Stain 2 Positive Cells	0		tumour: % Stain 2 Positive Cells	0		tumour: % Stain 2 Positive Cells	0		tumour: % Stain 2 Positive Cells	0		tumour: % Stain 2 Positive Cells	0		tumour: % Stain 2 Positive Cells	0		tumour: % Stain 2 Positive Cells	0		tumour: % Stain 2 Positive Cells	0
		tumour: % Stain 2 0+ Cells	100		tumour: % Stain 2 0+ Cells	100		tumour: % Stain 2 0+ Cells	100		tumour: % Stain 2 0+ Cells	100		tumour: % Stain 2 0+ Cells	100		tumour: % Stain 2 0+ Cells	100		tumour: % Stain 2 0+ Cells	100		tumour: % Stain 2 0+ Cells	100
		tumour: % Stain 2 1+ Cells	0		tumour: % Stain 2 1+ Cells	0		tumour: % Stain 2 1+ Cells	0		tumour: % Stain 2 1+ Cells	0		tumour: % Stain 2 1+ Cells	0		tumour: % Stain 2 1+ Cells	0		tumour: % Stain 2 1+ Cells	0		tumour: % Stain 2 1+ Cells	0
		tumour: % Stain 2 2+ Cells	0		tumour: % Stain 2 2+ Cells	0		tumour: % Stain 2 2+ Cells	0		tumour: % Stain 2 2+ Cells	0		tumour: % Stain 2 2+ Cells	0		tumour: % Stain 2 2+ Cells	0		tumour: % Stain 2 2+ Cells	0		tumour: % Stain 2 2+ Cells	0
		tumour: % Stain 2 3+ Cells	0		tumour: % Stain 2 3+ Cells	0		tumour: % Stain 2 3+ Cells	0		tumour: % Stain 2 3+ Cells	0		tumour: % Stain 2 3+ Cells	0		tumour: % Stain 2 3+ Cells	0		tumour: % Stain 2 3+ Cells	0		tumour: % Stain 2 3+ Cells	0
		tumour: Stain 2 H-Score	0		tumour: Stain 2 H-Score	0		tumour: Stain 2 H-Score	0		tumour: Stain 2 H-Score	0		tumour: Stain 2 H-Score	0		tumour: Stain 2 H-Score	0		tumour: Stain 2 H-Score	0		tumour: Stain 2 H-Score	0
		tumour: % Dual Positive Cells	0		tumour: % Dual Positive Cells	0		tumour: % Dual Positive Cells	0		tumour: % Dual Positive Cells	0		tumour: % Dual Positive Cells	0		tumour: % Dual Positive Cells	0		tumour: % Dual Positive Cells	0		tumour: % Dual Positive Cells	0
		tumour: % Dual Negative Cells	39.9453		tumour: % Dual Negative Cells	31.5783		tumour: % Dual Negative Cells	52.6704		tumour: % Dual Negative Cells	34.8452		tumour: % Dual Negative Cells	30.6004		tumour: % Dual Negative Cells	50.7215		tumour: % Dual Negative Cells	37.2526		tumour: % Dual Negative Cells	53.8577
		tumour: Avg Stain 1 Nuclear OD	0.27188		tumour: Avg Stain 1 Nuclear OD	0.310159		tumour: Avg Stain 1 Nuclear OD	0.225703		tumour: Avg Stain 1 Nuclear OD	0.325904		tumour: Avg Stain 1 Nuclear OD	0.331242		tumour: Avg Stain 1 Nuclear OD	0.246118		tumour: Avg Stain 1 Nuclear OD	0.313819		tumour: Avg Stain 1 Nuclear OD	0.240111
		tumour: Avg Stain 2 Nuclear OD	0.0488073		tumour: Avg Stain 2 Nuclear OD	0.0542226		tumour: Avg Stain 2 Nuclear OD	0.0455162		tumour: Avg Stain 2 Nuclear OD	0.0546776		tumour: Avg Stain 2 Nuclear OD	0.0530154		tumour: Avg Stain 2 Nuclear OD	0.0499583		tumour: Avg Stain 2 Nuclear OD	0.0547583		tumour: Avg Stain 2 Nuclear OD	0.0480301
		tumour: Avg Stain 1 Cytoplasmic OD	0.0764225		tumour: Avg Stain 1 Cytoplasmic OD	0.0815639		tumour: Avg Stain 1 Cytoplasmic OD	0.0676425		tumour: Avg Stain 1 Cytoplasmic OD	0.0858738		tumour: Avg Stain 1 Cytoplasmic OD	0.0855898		tumour: Avg Stain 1 Cytoplasmic OD	0.0686069		tumour: Avg Stain 1 Cytoplasmic OD	0.0848122		tumour: Avg Stain 1 Cytoplasmic OD	0.0741505
		tumour: Avg Stain 2 Cytoplasmic OD	0.0320236		tumour: Avg Stain 2 Cytoplasmic OD	0.0323294		tumour: Avg Stain 2 Cytoplasmic OD	0.0316885		tumour: Avg Stain 2 Cytoplasmic OD	0.0323866		tumour: Avg Stain 2 Cytoplasmic OD	0.0322673		tumour: Avg Stain 2 Cytoplasmic OD	0.032253		tumour: Avg Stain 2 Cytoplasmic OD	0.0323156		tumour: Avg Stain 2 Cytoplasmic OD	0.0319328
		tumour: Avg Cell Area (µm²)	104.329		tumour: Avg Cell Area (µm²)	110.11		tumour: Avg Cell Area (µm²)	105.41		tumour: Avg Cell Area (µm²)	104.851		tumour: Avg Cell Area (µm²)	105.654		tumour: Avg Cell Area (µm²)	101.319		tumour: Avg Cell Area (µm²)	104.207		tumour: Avg Cell Area (µm²)	108.426
		tumour: Avg Cytoplasm Area (µm²)	79.109		tumour: Avg Cytoplasm Area (µm²)	83.9978		tumour: Avg Cytoplasm Area (µm²)	80.3716		tumour: Avg Cytoplasm Area (µm²)	78.6381		tumour: Avg Cytoplasm Area (µm²)	79.4588		tumour: Avg Cytoplasm Area (µm²)	76.4589		tumour: Avg Cytoplasm Area (µm²)	76.4205		tumour: Avg Cytoplasm Area (µm²)	80.5489
		tumour: Avg Nucleus Area (µm²)	25.2199		tumour: Avg Nucleus Area (µm²)	26.1123		tumour: Avg Nucleus Area (µm²)	25.0389		tumour: Avg Nucleus Area (µm²)	26.2132		tumour: Avg Nucleus Area (µm²)	26.1952		tumour: Avg Nucleus Area (µm²)	24.8602		tumour: Avg Nucleus Area (µm²)	27.7862		tumour: Avg Nucleus Area (µm²)	27.877
		tumour: Avg Nucleus Perimeter (µm)	9.95834		tumour: Avg Nucleus Perimeter (µm)	10.2892		tumour: Avg Nucleus Perimeter (µm)	9.89203		tumour: Avg Nucleus Perimeter (µm)	10.3134		tumour: Avg Nucleus Perimeter (µm)	10.3225		tumour: Avg Nucleus Perimeter (µm)	9.81275		tumour: Avg Nucleus Perimeter (µm)	10.9179		tumour: Avg Nucleus Perimeter (µm)	10.9167
		tumour: Avg Nucleus Roundness	0.699732		tumour: Avg Nucleus Roundness	0.702503		tumour: Avg Nucleus Roundness	0.700359		tumour: Avg Nucleus Roundness	0.698785		tumour: Avg Nucleus Roundness	0.699262		tumour: Avg Nucleus Roundness	0.693813		tumour: Avg Nucleus Roundness	0.693962		tumour: Avg Nucleus Roundness	0.70018
		tumour: Tissue Area (µm²)	1579860		tumour: Tissue Area (µm²)	1868340		tumour: Tissue Area (µm²)	2182330		tumour: Tissue Area (µm²)	2764140		tumour: Tissue Area (µm²)	2472610		tumour: Tissue Area (µm²)	1967980		tumour: Tissue Area (µm²)	1527470		tumour: Tissue Area (µm²)	1542830
		BSNA9.4a	HOM
		Name	Value		Name	Value		Name	Value		Name	Value		Name	Value		Name	Value		Name	Value		Name	Value
		Classified Area (mm²)	2.99827		Classified Area (mm²)	1.56219		Classified Area (mm²)	1.85269		Classified Area (mm²)	2.59919		Classified Area (mm²)	1.95322		Classified Area (mm²)	2.37528		Classified Area (mm²)	2.48672		Classified Area (mm²)	2.96744
		tumour Area (mm²)	2.99827		tumour Area (mm²)	1.56184		tumour Area (mm²)	1.85269		tumour Area (mm²)	2.51458		tumour Area (mm²)	1.95297		tumour Area (mm²)	2.35697		tumour Area (mm²)	2.45513		tumour Area (mm²)	2.96659
		empty Area (mm²)	0		empty Area (mm²)	0.00015		empty Area (mm²)	0		empty Area (mm²)	0.01385		empty Area (mm²)	0		empty Area (mm²)	0.01293		empty Area (mm²)	0		empty Area (mm²)	0.00085
		necrosis Area (mm²)	0		necrosis Area (mm²)	0		necrosis Area (mm²)	0		necrosis Area (mm²)	0		necrosis Area (mm²)	0		necrosis Area (mm²)	0		necrosis Area (mm²)	0		necrosis Area (mm²)	0
		normal Area (mm²)	0		normal Area (mm²)	0.0002		normal Area (mm²)	0		normal Area (mm²)	0.07076		normal Area (mm²)	0.00024		normal Area (mm²)	0.00538		normal Area (mm²)	0.03159		normal Area (mm²)	0
		Total Cells	11352		Total Cells	5910		Total Cells	7335		Total Cells	10329		Total Cells	8586		Total Cells	9283		Total Cells	9695		Total Cells	12272
		Stain 1 Positive Cells	7280		Stain 1 Positive Cells	4085		Stain 1 Positive Cells	5022		Stain 1 Positive Cells	4329		Stain 1 Positive Cells	5200		Stain 1 Positive Cells	5498		Stain 1 Positive Cells	3452		Stain 1 Positive Cells	7986
		Stain 1 0+ Cells	4072		Stain 1 0+ Cells	1825		Stain 1 0+ Cells	2313		Stain 1 0+ Cells	6000		Stain 1 0+ Cells	3386		Stain 1 0+ Cells	3785		Stain 1 0+ Cells	6243		Stain 1 0+ Cells	4286
		Stain 1 1+ Cells	2424		Stain 1 1+ Cells	1282		Stain 1 1+ Cells	1767		Stain 1 1+ Cells	1316		Stain 1 1+ Cells	1518		Stain 1 1+ Cells	1869		Stain 1 1+ Cells	1151		Stain 1 1+ Cells	2618
		Stain 1 2+ Cells	2661		Stain 1 2+ Cells	1321		Stain 1 2+ Cells	1911		Stain 1 2+ Cells	1450		Stain 1 2+ Cells	1933		Stain 1 2+ Cells	1750		Stain 1 2+ Cells	1120		Stain 1 2+ Cells	2906
		Stain 1 3+ Cells	2195		Stain 1 3+ Cells	1482		Stain 1 3+ Cells	1344		Stain 1 3+ Cells	1563		Stain 1 3+ Cells	1749		Stain 1 3+ Cells	1879		Stain 1 3+ Cells	1181		Stain 1 3+ Cells	2462
		Stain 2 Positive Cells	0		Stain 2 Positive Cells	0		Stain 2 Positive Cells	0		Stain 2 Positive Cells	0		Stain 2 Positive Cells	0		Stain 2 Positive Cells	0		Stain 2 Positive Cells	0		Stain 2 Positive Cells	0
		Stain 2 0+ Cells	11352		Stain 2 0+ Cells	5910		Stain 2 0+ Cells	7335		Stain 2 0+ Cells	10329		Stain 2 0+ Cells	8586		Stain 2 0+ Cells	9283		Stain 2 0+ Cells	9695		Stain 2 0+ Cells	12272
		Stain 2 1+ Cells	0		Stain 2 1+ Cells	0		Stain 2 1+ Cells	0		Stain 2 1+ Cells	0		Stain 2 1+ Cells	0		Stain 2 1+ Cells	0		Stain 2 1+ Cells	0		Stain 2 1+ Cells	0
		Stain 2 2+ Cells	0		Stain 2 2+ Cells	0		Stain 2 2+ Cells	0		Stain 2 2+ Cells	0		Stain 2 2+ Cells	0		Stain 2 2+ Cells	0		Stain 2 2+ Cells	0		Stain 2 2+ Cells	0
		Stain 2 3+ Cells	0		Stain 2 3+ Cells	0		Stain 2 3+ Cells	0		Stain 2 3+ Cells	0		Stain 2 3+ Cells	0		Stain 2 3+ Cells	0		Stain 2 3+ Cells	0		Stain 2 3+ Cells	0
		Dual Positive Cells	0		Dual Positive Cells	0		Dual Positive Cells	0		Dual Positive Cells	0		Dual Positive Cells	0		Dual Positive Cells	0		Dual Positive Cells	0		Dual Positive Cells	0
		Dual Negative Cells	4072		Dual Negative Cells	1825		Dual Negative Cells	2313		Dual Negative Cells	6000		Dual Negative Cells	3386		Dual Negative Cells	3785		Dual Negative Cells	6243		Dual Negative Cells	4286
		% Stain 1 Positive Cells	64.1297		% Stain 1 Positive Cells	69.1201		% Stain 1 Positive Cells	68.4663		% Stain 1 Positive Cells	41.9111		% Stain 1 Positive Cells	60.5637		% Stain 1 Positive Cells	59.2265		% Stain 1 Positive Cells	35.606		% Stain 1 Positive Cells	65.075		58.0123
		% Stain 1 0+ Cells	35.8703		% Stain 1 0+ Cells	30.8799		% Stain 1 0+ Cells	31.5337		% Stain 1 0+ Cells	58.0889		% Stain 1 0+ Cells	39.4363		% Stain 1 0+ Cells	40.7735		% Stain 1 0+ Cells	64.394		% Stain 1 0+ Cells	34.925
		% Stain 1 1+ Cells	21.3531		% Stain 1 1+ Cells	21.692		% Stain 1 1+ Cells	24.09		% Stain 1 1+ Cells	12.7408		% Stain 1 1+ Cells	17.6799		% Stain 1 1+ Cells	20.1336		% Stain 1 1+ Cells	11.8721		% Stain 1 1+ Cells	21.3331
		% Stain 1 2+ Cells	23.4408		% Stain 1 2+ Cells	22.3519		% Stain 1 2+ Cells	26.0532		% Stain 1 2+ Cells	14.0381		% Stain 1 2+ Cells	22.5134		% Stain 1 2+ Cells	18.8517		% Stain 1 2+ Cells	11.5523		% Stain 1 2+ Cells	23.6799
		% Stain 1 3+ Cells	19.3358		% Stain 1 3+ Cells	25.0761		% Stain 1 3+ Cells	18.3231		% Stain 1 3+ Cells	15.1322		% Stain 1 3+ Cells	20.3704		% Stain 1 3+ Cells	20.2413		% Stain 1 3+ Cells	12.1815		% Stain 1 3+ Cells	20.0619
		Stain 1 H-Score	126.242		Stain 1 H-Score	141.624		Stain 1 H-Score	131.166		Stain 1 H-Score	86.2136		Stain 1 H-Score	123.818		Stain 1 H-Score	118.561		Stain 1 H-Score	71.5214		Stain 1 H-Score	128.879
		% Stain 2 Positive Cells	0		% Stain 2 Positive Cells	0		% Stain 2 Positive Cells	0		% Stain 2 Positive Cells	0		% Stain 2 Positive Cells	0		% Stain 2 Positive Cells	0		% Stain 2 Positive Cells	0		% Stain 2 Positive Cells	0
		% Stain 2 0+ Cells	100		% Stain 2 0+ Cells	100		% Stain 2 0+ Cells	100		% Stain 2 0+ Cells	100		% Stain 2 0+ Cells	100		% Stain 2 0+ Cells	100		% Stain 2 0+ Cells	100		% Stain 2 0+ Cells	100
		% Stain 2 1+ Cells	0		% Stain 2 1+ Cells	0		% Stain 2 1+ Cells	0		% Stain 2 1+ Cells	0		% Stain 2 1+ Cells	0		% Stain 2 1+ Cells	0		% Stain 2 1+ Cells	0		% Stain 2 1+ Cells	0
		% Stain 2 2+ Cells	0		% Stain 2 2+ Cells	0		% Stain 2 2+ Cells	0		% Stain 2 2+ Cells	0		% Stain 2 2+ Cells	0		% Stain 2 2+ Cells	0		% Stain 2 2+ Cells	0		% Stain 2 2+ Cells	0
		% Stain 2 3+ Cells	0		% Stain 2 3+ Cells	0		% Stain 2 3+ Cells	0		% Stain 2 3+ Cells	0		% Stain 2 3+ Cells	0		% Stain 2 3+ Cells	0		% Stain 2 3+ Cells	0		% Stain 2 3+ Cells	0
		Stain 2 H-Score	0		Stain 2 H-Score	0		Stain 2 H-Score	0		Stain 2 H-Score	0		Stain 2 H-Score	0		Stain 2 H-Score	0		Stain 2 H-Score	0		Stain 2 H-Score	0
		% Dual Positive Cells	0		% Dual Positive Cells	0		% Dual Positive Cells	0		% Dual Positive Cells	0		% Dual Positive Cells	0		% Dual Positive Cells	0		% Dual Positive Cells	0		% Dual Positive Cells	0
		% Dual Negative Cells	35.8703		% Dual Negative Cells	30.8799		% Dual Negative Cells	31.5337		% Dual Negative Cells	58.0889		% Dual Negative Cells	39.4363		% Dual Negative Cells	40.7735		% Dual Negative Cells	64.394		% Dual Negative Cells	34.925
		Avg Stain 1 Nuclear OD	0.288154		Avg Stain 1 Nuclear OD	0.327581		Avg Stain 1 Nuclear OD	0.296783		Avg Stain 1 Nuclear OD	0.210429		Avg Stain 1 Nuclear OD	0.288018		Avg Stain 1 Nuclear OD	0.283778		Avg Stain 1 Nuclear OD	0.18259		Avg Stain 1 Nuclear OD	0.30023
		Avg Stain 2 Nuclear OD	0.0512299		Avg Stain 2 Nuclear OD	0.0574434		Avg Stain 2 Nuclear OD	0.053667		Avg Stain 2 Nuclear OD	0.0494338		Avg Stain 2 Nuclear OD	0.0547265		Avg Stain 2 Nuclear OD	0.0547689		Avg Stain 2 Nuclear OD	0.0465624		Avg Stain 2 Nuclear OD	0.0554373
		Avg Stain 1 Cytoplasmic OD	0.0797394		Avg Stain 1 Cytoplasmic OD	0.0859071		Avg Stain 1 Cytoplasmic OD	0.0792502		Avg Stain 1 Cytoplasmic OD	0.0637182		Avg Stain 1 Cytoplasmic OD	0.0782645		Avg Stain 1 Cytoplasmic OD	0.0778685		Avg Stain 1 Cytoplasmic OD	0.0577808		Avg Stain 1 Cytoplasmic OD	0.0778092
		Avg Stain 2 Cytoplasmic OD	0.0323887		Avg Stain 2 Cytoplasmic OD	0.0328811		Avg Stain 2 Cytoplasmic OD	0.0326359		Avg Stain 2 Cytoplasmic OD	0.0324713		Avg Stain 2 Cytoplasmic OD	0.0324743		Avg Stain 2 Cytoplasmic OD	0.0323806		Avg Stain 2 Cytoplasmic OD	0.0321142		Avg Stain 2 Cytoplasmic OD	0.0324156
		Avg Cell Area (µm²)	119.428		Avg Cell Area (µm²)	123.528		Avg Cell Area (µm²)	110.838		Avg Cell Area (µm²)	111.354		Avg Cell Area (µm²)	108.677		Avg Cell Area (µm²)	114.601		Avg Cell Area (µm²)	113.577		Avg Cell Area (µm²)	109.846
		Avg Cytoplasm Area (µm²)	88.5559		Avg Cytoplasm Area (µm²)	89.6555		Avg Cytoplasm Area (µm²)	84.4683		Avg Cytoplasm Area (µm²)	82.1765		Avg Cytoplasm Area (µm²)	80.6676		Avg Cytoplasm Area (µm²)	85.814		Avg Cytoplasm Area (µm²)	85.7836		Avg Cytoplasm Area (µm²)	83.2309
		Avg Nucleus Area (µm²)	30.8722		Avg Nucleus Area (µm²)	33.8726		Avg Nucleus Area (µm²)	26.3702		Avg Nucleus Area (µm²)	29.1772		Avg Nucleus Area (µm²)	28.009		Avg Nucleus Area (µm²)	28.7868		Avg Nucleus Area (µm²)	27.7931		Avg Nucleus Area (µm²)	26.6147
		Avg Nucleus Perimeter (µm)	11.8415		Avg Nucleus Perimeter (µm)	12.8559		Avg Nucleus Perimeter (µm)	10.361		Avg Nucleus Perimeter (µm)	11.2809		Avg Nucleus Perimeter (µm)	10.9256		Avg Nucleus Perimeter (µm)	11.2028		Avg Nucleus Perimeter (µm)	10.8735		Avg Nucleus Perimeter (µm)	10.4633
		Avg Nucleus Roundness	0.701675		Avg Nucleus Roundness	0.704194		Avg Nucleus Roundness	0.706022		Avg Nucleus Roundness	0.701317		Avg Nucleus Roundness	0.699651		Avg Nucleus Roundness	0.703779		Avg Nucleus Roundness	0.701063		Avg Nucleus Roundness	0.699365
		Tissue Area (µm²)	3000140		Tissue Area (µm²)	1556060		Tissue Area (µm²)	1841040		Tissue Area (µm²)	2498600		Tissue Area (µm²)	1952510		Tissue Area (µm²)	2344140		Tissue Area (µm²)	2462760		Tissue Area (µm²)	2940760
		tumour: Total Cells	11352		tumour: Total Cells	5910		tumour: Total Cells	7335		tumour: Total Cells	10329		tumour: Total Cells	8586		tumour: Total Cells	9283		tumour: Total Cells	9695		tumour: Total Cells	12272
		tumour: Stain 1 Positive Cells	7280		tumour: Stain 1 Positive Cells	4085		tumour: Stain 1 Positive Cells	5022		tumour: Stain 1 Positive Cells	4329		tumour: Stain 1 Positive Cells	5200		tumour: Stain 1 Positive Cells	5498		tumour: Stain 1 Positive Cells	3452		tumour: Stain 1 Positive Cells	7986
		tumour: Stain 1 0+ Cells	4072		tumour: Stain 1 0+ Cells	1825		tumour: Stain 1 0+ Cells	2313		tumour: Stain 1 0+ Cells	6000		tumour: Stain 1 0+ Cells	3386		tumour: Stain 1 0+ Cells	3785		tumour: Stain 1 0+ Cells	6243		tumour: Stain 1 0+ Cells	4286
		tumour: Stain 1 1+ Cells	2424		tumour: Stain 1 1+ Cells	1282		tumour: Stain 1 1+ Cells	1767		tumour: Stain 1 1+ Cells	1316		tumour: Stain 1 1+ Cells	1518		tumour: Stain 1 1+ Cells	1869		tumour: Stain 1 1+ Cells	1151		tumour: Stain 1 1+ Cells	2618
		tumour: Stain 1 2+ Cells	2661		tumour: Stain 1 2+ Cells	1321		tumour: Stain 1 2+ Cells	1911		tumour: Stain 1 2+ Cells	1450		tumour: Stain 1 2+ Cells	1933		tumour: Stain 1 2+ Cells	1750		tumour: Stain 1 2+ Cells	1120		tumour: Stain 1 2+ Cells	2906
		tumour: Stain 1 3+ Cells	2195		tumour: Stain 1 3+ Cells	1482		tumour: Stain 1 3+ Cells	1344		tumour: Stain 1 3+ Cells	1563		tumour: Stain 1 3+ Cells	1749		tumour: Stain 1 3+ Cells	1879		tumour: Stain 1 3+ Cells	1181		tumour: Stain 1 3+ Cells	2462
		tumour: Stain 2 Positive Cells	0		tumour: Stain 2 Positive Cells	0		tumour: Stain 2 Positive Cells	0		tumour: Stain 2 Positive Cells	0		tumour: Stain 2 Positive Cells	0		tumour: Stain 2 Positive Cells	0		tumour: Stain 2 Positive Cells	0		tumour: Stain 2 Positive Cells	0
		tumour: Stain 2 0+ Cells	11352		tumour: Stain 2 0+ Cells	5910		tumour: Stain 2 0+ Cells	7335		tumour: Stain 2 0+ Cells	10329		tumour: Stain 2 0+ Cells	8586		tumour: Stain 2 0+ Cells	9283		tumour: Stain 2 0+ Cells	9695		tumour: Stain 2 0+ Cells	12272
		tumour: Stain 2 1+ Cells	0		tumour: Stain 2 1+ Cells	0		tumour: Stain 2 1+ Cells	0		tumour: Stain 2 1+ Cells	0		tumour: Stain 2 1+ Cells	0		tumour: Stain 2 1+ Cells	0		tumour: Stain 2 1+ Cells	0		tumour: Stain 2 1+ Cells	0
		tumour: Stain 2 2+ Cells	0		tumour: Stain 2 2+ Cells	0		tumour: Stain 2 2+ Cells	0		tumour: Stain 2 2+ Cells	0		tumour: Stain 2 2+ Cells	0		tumour: Stain 2 2+ Cells	0		tumour: Stain 2 2+ Cells	0		tumour: Stain 2 2+ Cells	0
		tumour: Stain 2 3+ Cells	0		tumour: Stain 2 3+ Cells	0		tumour: Stain 2 3+ Cells	0		tumour: Stain 2 3+ Cells	0		tumour: Stain 2 3+ Cells	0		tumour: Stain 2 3+ Cells	0		tumour: Stain 2 3+ Cells	0		tumour: Stain 2 3+ Cells	0
		tumour: Dual Positive Cells	0		tumour: Dual Positive Cells	0		tumour: Dual Positive Cells	0		tumour: Dual Positive Cells	0		tumour: Dual Positive Cells	0		tumour: Dual Positive Cells	0		tumour: Dual Positive Cells	0		tumour: Dual Positive Cells	0
		tumour: Dual Negative Cells	4072		tumour: Dual Negative Cells	1825		tumour: Dual Negative Cells	2313		tumour: Dual Negative Cells	6000		tumour: Dual Negative Cells	3386		tumour: Dual Negative Cells	3785		tumour: Dual Negative Cells	6243		tumour: Dual Negative Cells	4286
		tumour: % Stain 1 Positive Cells	64.1297		tumour: % Stain 1 Positive Cells	69.1201		tumour: % Stain 1 Positive Cells	68.4663		tumour: % Stain 1 Positive Cells	41.9111		tumour: % Stain 1 Positive Cells	60.5637		tumour: % Stain 1 Positive Cells	59.2265		tumour: % Stain 1 Positive Cells	35.606		tumour: % Stain 1 Positive Cells	65.075
		tumour: % Stain 1 0+ Cells	35.8703		tumour: % Stain 1 0+ Cells	30.8799		tumour: % Stain 1 0+ Cells	31.5337		tumour: % Stain 1 0+ Cells	58.0889		tumour: % Stain 1 0+ Cells	39.4363		tumour: % Stain 1 0+ Cells	40.7735		tumour: % Stain 1 0+ Cells	64.394		tumour: % Stain 1 0+ Cells	34.925
		tumour: % Stain 1 1+ Cells	21.3531		tumour: % Stain 1 1+ Cells	21.692		tumour: % Stain 1 1+ Cells	24.09		tumour: % Stain 1 1+ Cells	12.7408		tumour: % Stain 1 1+ Cells	17.6799		tumour: % Stain 1 1+ Cells	20.1336		tumour: % Stain 1 1+ Cells	11.8721		tumour: % Stain 1 1+ Cells	21.3331
		tumour: % Stain 1 2+ Cells	23.4408		tumour: % Stain 1 2+ Cells	22.3519		tumour: % Stain 1 2+ Cells	26.0532		tumour: % Stain 1 2+ Cells	14.0381		tumour: % Stain 1 2+ Cells	22.5134		tumour: % Stain 1 2+ Cells	18.8517		tumour: % Stain 1 2+ Cells	11.5523		tumour: % Stain 1 2+ Cells	23.6799
		tumour: % Stain 1 3+ Cells	19.3358		tumour: % Stain 1 3+ Cells	25.0761		tumour: % Stain 1 3+ Cells	18.3231		tumour: % Stain 1 3+ Cells	15.1322		tumour: % Stain 1 3+ Cells	20.3704		tumour: % Stain 1 3+ Cells	20.2413		tumour: % Stain 1 3+ Cells	12.1815		tumour: % Stain 1 3+ Cells	20.0619
		tumour: Stain 1 H-Score	126.242		tumour: Stain 1 H-Score	141.624		tumour: Stain 1 H-Score	131.166		tumour: Stain 1 H-Score	86.2136		tumour: Stain 1 H-Score	123.818		tumour: Stain 1 H-Score	118.561		tumour: Stain 1 H-Score	71.5214		tumour: Stain 1 H-Score	128.879
		tumour: % Stain 2 Positive Cells	0		tumour: % Stain 2 Positive Cells	0		tumour: % Stain 2 Positive Cells	0		tumour: % Stain 2 Positive Cells	0		tumour: % Stain 2 Positive Cells	0		tumour: % Stain 2 Positive Cells	0		tumour: % Stain 2 Positive Cells	0		tumour: % Stain 2 Positive Cells	0
		tumour: % Stain 2 0+ Cells	100		tumour: % Stain 2 0+ Cells	100		tumour: % Stain 2 0+ Cells	100		tumour: % Stain 2 0+ Cells	100		tumour: % Stain 2 0+ Cells	100		tumour: % Stain 2 0+ Cells	100		tumour: % Stain 2 0+ Cells	100		tumour: % Stain 2 0+ Cells	100
		tumour: % Stain 2 1+ Cells	0		tumour: % Stain 2 1+ Cells	0		tumour: % Stain 2 1+ Cells	0		tumour: % Stain 2 1+ Cells	0		tumour: % Stain 2 1+ Cells	0		tumour: % Stain 2 1+ Cells	0		tumour: % Stain 2 1+ Cells	0		tumour: % Stain 2 1+ Cells	0
		tumour: % Stain 2 2+ Cells	0		tumour: % Stain 2 2+ Cells	0		tumour: % Stain 2 2+ Cells	0		tumour: % Stain 2 2+ Cells	0		tumour: % Stain 2 2+ Cells	0		tumour: % Stain 2 2+ Cells	0		tumour: % Stain 2 2+ Cells	0		tumour: % Stain 2 2+ Cells	0
		tumour: % Stain 2 3+ Cells	0		tumour: % Stain 2 3+ Cells	0		tumour: % Stain 2 3+ Cells	0		tumour: % Stain 2 3+ Cells	0		tumour: % Stain 2 3+ Cells	0		tumour: % Stain 2 3+ Cells	0		tumour: % Stain 2 3+ Cells	0		tumour: % Stain 2 3+ Cells	0
		tumour: Stain 2 H-Score	0		tumour: Stain 2 H-Score	0		tumour: Stain 2 H-Score	0		tumour: Stain 2 H-Score	0		tumour: Stain 2 H-Score	0		tumour: Stain 2 H-Score	0		tumour: Stain 2 H-Score	0		tumour: Stain 2 H-Score	0
		tumour: % Dual Positive Cells	0		tumour: % Dual Positive Cells	0		tumour: % Dual Positive Cells	0		tumour: % Dual Positive Cells	0		tumour: % Dual Positive Cells	0		tumour: % Dual Positive Cells	0		tumour: % Dual Positive Cells	0		tumour: % Dual Positive Cells	0
		tumour: % Dual Negative Cells	35.8703		tumour: % Dual Negative Cells	30.8799		tumour: % Dual Negative Cells	31.5337		tumour: % Dual Negative Cells	58.0889		tumour: % Dual Negative Cells	39.4363		tumour: % Dual Negative Cells	40.7735		tumour: % Dual Negative Cells	64.394		tumour: % Dual Negative Cells	34.925
		tumour: Avg Stain 1 Nuclear OD	0.288154		tumour: Avg Stain 1 Nuclear OD	0.327581		tumour: Avg Stain 1 Nuclear OD	0.296783		tumour: Avg Stain 1 Nuclear OD	0.210429		tumour: Avg Stain 1 Nuclear OD	0.288018		tumour: Avg Stain 1 Nuclear OD	0.283778		tumour: Avg Stain 1 Nuclear OD	0.18259		tumour: Avg Stain 1 Nuclear OD	0.30023
		tumour: Avg Stain 2 Nuclear OD	0.0512299		tumour: Avg Stain 2 Nuclear OD	0.0574434		tumour: Avg Stain 2 Nuclear OD	0.053667		tumour: Avg Stain 2 Nuclear OD	0.0494338		tumour: Avg Stain 2 Nuclear OD	0.0547265		tumour: Avg Stain 2 Nuclear OD	0.0547689		tumour: Avg Stain 2 Nuclear OD	0.0465624		tumour: Avg Stain 2 Nuclear OD	0.0554373
		tumour: Avg Stain 1 Cytoplasmic OD	0.0797394		tumour: Avg Stain 1 Cytoplasmic OD	0.0859071		tumour: Avg Stain 1 Cytoplasmic OD	0.0792502		tumour: Avg Stain 1 Cytoplasmic OD	0.0637182		tumour: Avg Stain 1 Cytoplasmic OD	0.0782645		tumour: Avg Stain 1 Cytoplasmic OD	0.0778685		tumour: Avg Stain 1 Cytoplasmic OD	0.0577808		tumour: Avg Stain 1 Cytoplasmic OD	0.0778092
		tumour: Avg Stain 2 Cytoplasmic OD	0.0323887		tumour: Avg Stain 2 Cytoplasmic OD	0.0328811		tumour: Avg Stain 2 Cytoplasmic OD	0.0326359		tumour: Avg Stain 2 Cytoplasmic OD	0.0324713		tumour: Avg Stain 2 Cytoplasmic OD	0.0324743		tumour: Avg Stain 2 Cytoplasmic OD	0.0323806		tumour: Avg Stain 2 Cytoplasmic OD	0.0321142		tumour: Avg Stain 2 Cytoplasmic OD	0.0324156
		tumour: Avg Cell Area (µm²)	119.428		tumour: Avg Cell Area (µm²)	123.528		tumour: Avg Cell Area (µm²)	110.838		tumour: Avg Cell Area (µm²)	111.354		tumour: Avg Cell Area (µm²)	108.677		tumour: Avg Cell Area (µm²)	114.601		tumour: Avg Cell Area (µm²)	113.577		tumour: Avg Cell Area (µm²)	109.846
		tumour: Avg Cytoplasm Area (µm²)	88.5559		tumour: Avg Cytoplasm Area (µm²)	89.6555		tumour: Avg Cytoplasm Area (µm²)	84.4683		tumour: Avg Cytoplasm Area (µm²)	82.1765		tumour: Avg Cytoplasm Area (µm²)	80.6676		tumour: Avg Cytoplasm Area (µm²)	85.814		tumour: Avg Cytoplasm Area (µm²)	85.7836		tumour: Avg Cytoplasm Area (µm²)	83.2309
		tumour: Avg Nucleus Area (µm²)	30.8722		tumour: Avg Nucleus Area (µm²)	33.8726		tumour: Avg Nucleus Area (µm²)	26.3702		tumour: Avg Nucleus Area (µm²)	29.1772		tumour: Avg Nucleus Area (µm²)	28.009		tumour: Avg Nucleus Area (µm²)	28.7868		tumour: Avg Nucleus Area (µm²)	27.7931		tumour: Avg Nucleus Area (µm²)	26.6147
		tumour: Avg Nucleus Perimeter (µm)	11.8415		tumour: Avg Nucleus Perimeter (µm)	12.8559		tumour: Avg Nucleus Perimeter (µm)	10.361		tumour: Avg Nucleus Perimeter (µm)	11.2809		tumour: Avg Nucleus Perimeter (µm)	10.9256		tumour: Avg Nucleus Perimeter (µm)	11.2028		tumour: Avg Nucleus Perimeter (µm)	10.8735		tumour: Avg Nucleus Perimeter (µm)	10.4633
		tumour: Avg Nucleus Roundness	0.701675		tumour: Avg Nucleus Roundness	0.704194		tumour: Avg Nucleus Roundness	0.706022		tumour: Avg Nucleus Roundness	0.701317		tumour: Avg Nucleus Roundness	0.699651		tumour: Avg Nucleus Roundness	0.703779		tumour: Avg Nucleus Roundness	0.701063		tumour: Avg Nucleus Roundness	0.699365
		tumour: Tissue Area (µm²)	3000140		tumour: Tissue Area (µm²)	1556060		tumour: Tissue Area (µm²)	1841040		tumour: Tissue Area (µm²)	2498600		tumour: Tissue Area (µm²)	1952510		tumour: Tissue Area (µm²)	2344140		tumour: Tissue Area (µm²)	2462760		tumour: Tissue Area (µm²)	2940760
		BSNA24.1d	HOM
		Name	Value		Name	Value		Name	Value		Name	Value		Name	Value		Name	Value		Name	Value		Name	Value
		Classified Area (mm²)	0.73691		Classified Area (mm²)	0.46402		Classified Area (mm²)	0.63078		Classified Area (mm²)	0.4722		Classified Area (mm²)	0.72895		Classified Area (mm²)	0.67601		Classified Area (mm²)	1.47628		Classified Area (mm²)	1.68166
		tumour Area (mm²)	0.73032		tumour Area (mm²)	0.46065		tumour Area (mm²)	0.62873		tumour Area (mm²)	0.47178		tumour Area (mm²)	0.71645		tumour Area (mm²)	0.67376		tumour Area (mm²)	1.43895		tumour Area (mm²)	1.67337
		empty Area (mm²)	0.00029		empty Area (mm²)	0		empty Area (mm²)	0.00057		empty Area (mm²)	0		empty Area (mm²)	0.00026		empty Area (mm²)	0.00075		empty Area (mm²)	0.00012		empty Area (mm²)	0.00558
		necrosis Area (mm²)	0		necrosis Area (mm²)	0		necrosis Area (mm²)	0		necrosis Area (mm²)	0		necrosis Area (mm²)	0		necrosis Area (mm²)	0		necrosis Area (mm²)	0		necrosis Area (mm²)	0.00045
		normal Area (mm²)	0.00629		normal Area (mm²)	0.00336		normal Area (mm²)	0.00148		normal Area (mm²)	0.00042		normal Area (mm²)	0.01224		normal Area (mm²)	0.0015		normal Area (mm²)	0.03721		normal Area (mm²)	0.00227
		Total Cells	2746		Total Cells	1781		Total Cells	2274		Total Cells	1655		Total Cells	2627		Total Cells	2455		Total Cells	5545		Total Cells	5941
		Stain 1 Positive Cells	1120		Stain 1 Positive Cells	821		Stain 1 Positive Cells	965		Stain 1 Positive Cells	1234		Stain 1 Positive Cells	910		Stain 1 Positive Cells	1410		Stain 1 Positive Cells	2835		Stain 1 Positive Cells	2664
		Stain 1 0+ Cells	1626		Stain 1 0+ Cells	960		Stain 1 0+ Cells	1309		Stain 1 0+ Cells	421		Stain 1 0+ Cells	1717		Stain 1 0+ Cells	1045		Stain 1 0+ Cells	2710		Stain 1 0+ Cells	3277
		Stain 1 1+ Cells	337		Stain 1 1+ Cells	215		Stain 1 1+ Cells	235		Stain 1 1+ Cells	323		Stain 1 1+ Cells	244		Stain 1 1+ Cells	444		Stain 1 1+ Cells	717		Stain 1 1+ Cells	638
		Stain 1 2+ Cells	400		Stain 1 2+ Cells	300		Stain 1 2+ Cells	320		Stain 1 2+ Cells	467		Stain 1 2+ Cells	332		Stain 1 2+ Cells	529		Stain 1 2+ Cells	968		Stain 1 2+ Cells	966
		Stain 1 3+ Cells	383		Stain 1 3+ Cells	306		Stain 1 3+ Cells	410		Stain 1 3+ Cells	444		Stain 1 3+ Cells	334		Stain 1 3+ Cells	437		Stain 1 3+ Cells	1150		Stain 1 3+ Cells	1060
		Stain 2 Positive Cells	0		Stain 2 Positive Cells	0		Stain 2 Positive Cells	0		Stain 2 Positive Cells	0		Stain 2 Positive Cells	0		Stain 2 Positive Cells	0		Stain 2 Positive Cells	0		Stain 2 Positive Cells	0
		Stain 2 0+ Cells	2746		Stain 2 0+ Cells	1781		Stain 2 0+ Cells	2274		Stain 2 0+ Cells	1655		Stain 2 0+ Cells	2627		Stain 2 0+ Cells	2455		Stain 2 0+ Cells	5545		Stain 2 0+ Cells	5941
		Stain 2 1+ Cells	0		Stain 2 1+ Cells	0		Stain 2 1+ Cells	0		Stain 2 1+ Cells	0		Stain 2 1+ Cells	0		Stain 2 1+ Cells	0		Stain 2 1+ Cells	0		Stain 2 1+ Cells	0
		Stain 2 2+ Cells	0		Stain 2 2+ Cells	0		Stain 2 2+ Cells	0		Stain 2 2+ Cells	0		Stain 2 2+ Cells	0		Stain 2 2+ Cells	0		Stain 2 2+ Cells	0		Stain 2 2+ Cells	0
		Stain 2 3+ Cells	0		Stain 2 3+ Cells	0		Stain 2 3+ Cells	0		Stain 2 3+ Cells	0		Stain 2 3+ Cells	0		Stain 2 3+ Cells	0		Stain 2 3+ Cells	0		Stain 2 3+ Cells	0
		Dual Positive Cells	0		Dual Positive Cells	0		Dual Positive Cells	0		Dual Positive Cells	0		Dual Positive Cells	0		Dual Positive Cells	0		Dual Positive Cells	0		Dual Positive Cells	0
		Dual Negative Cells	1626		Dual Negative Cells	960		Dual Negative Cells	1309		Dual Negative Cells	421		Dual Negative Cells	1717		Dual Negative Cells	1045		Dual Negative Cells	2710		Dual Negative Cells	3277
		% Stain 1 Positive Cells	40.7866		% Stain 1 Positive Cells	46.0977		% Stain 1 Positive Cells	42.4362		% Stain 1 Positive Cells	74.5619		% Stain 1 Positive Cells	34.6403		% Stain 1 Positive Cells	57.4338		% Stain 1 Positive Cells	51.1271		% Stain 1 Positive Cells	44.8409		48.9906
		% Stain 1 0+ Cells	59.2134		% Stain 1 0+ Cells	53.9023		% Stain 1 0+ Cells	57.5638		% Stain 1 0+ Cells	25.4381		% Stain 1 0+ Cells	65.3597		% Stain 1 0+ Cells	42.5662		% Stain 1 0+ Cells	48.8729		% Stain 1 0+ Cells	55.1591
		% Stain 1 1+ Cells	12.2724		% Stain 1 1+ Cells	12.0719		% Stain 1 1+ Cells	10.3342		% Stain 1 1+ Cells	19.5166		% Stain 1 1+ Cells	9.28816		% Stain 1 1+ Cells	18.0855		% Stain 1 1+ Cells	12.9306		% Stain 1 1+ Cells	10.7389
		% Stain 1 2+ Cells	14.5666		% Stain 1 2+ Cells	16.8445		% Stain 1 2+ Cells	14.0721		% Stain 1 2+ Cells	28.2175		% Stain 1 2+ Cells	12.638		% Stain 1 2+ Cells	21.5479		% Stain 1 2+ Cells	17.4572		% Stain 1 2+ Cells	16.2599
		% Stain 1 3+ Cells	13.9476		% Stain 1 3+ Cells	17.1814		% Stain 1 3+ Cells	18.0299		% Stain 1 3+ Cells	26.8278		% Stain 1 3+ Cells	12.7141		% Stain 1 3+ Cells	17.8004		% Stain 1 3+ Cells	20.7394		% Stain 1 3+ Cells	17.8421
		Stain 1 H-Score	83.2484		Stain 1 H-Score	97.3049		Stain 1 H-Score	92.5682		Stain 1 H-Score	156.435		Stain 1 H-Score	72.7065		Stain 1 H-Score	114.582		Stain 1 H-Score	110.063		Stain 1 H-Score	96.7851
		% Stain 2 Positive Cells	0		% Stain 2 Positive Cells	0		% Stain 2 Positive Cells	0		% Stain 2 Positive Cells	0		% Stain 2 Positive Cells	0		% Stain 2 Positive Cells	0		% Stain 2 Positive Cells	0		% Stain 2 Positive Cells	0
		% Stain 2 0+ Cells	100		% Stain 2 0+ Cells	100		% Stain 2 0+ Cells	100		% Stain 2 0+ Cells	100		% Stain 2 0+ Cells	100		% Stain 2 0+ Cells	100		% Stain 2 0+ Cells	100		% Stain 2 0+ Cells	100
		% Stain 2 1+ Cells	0		% Stain 2 1+ Cells	0		% Stain 2 1+ Cells	0		% Stain 2 1+ Cells	0		% Stain 2 1+ Cells	0		% Stain 2 1+ Cells	0		% Stain 2 1+ Cells	0		% Stain 2 1+ Cells	0
		% Stain 2 2+ Cells	0		% Stain 2 2+ Cells	0		% Stain 2 2+ Cells	0		% Stain 2 2+ Cells	0		% Stain 2 2+ Cells	0		% Stain 2 2+ Cells	0		% Stain 2 2+ Cells	0		% Stain 2 2+ Cells	0
		% Stain 2 3+ Cells	0		% Stain 2 3+ Cells	0		% Stain 2 3+ Cells	0		% Stain 2 3+ Cells	0		% Stain 2 3+ Cells	0		% Stain 2 3+ Cells	0		% Stain 2 3+ Cells	0		% Stain 2 3+ Cells	0
		Stain 2 H-Score	0		Stain 2 H-Score	0		Stain 2 H-Score	0		Stain 2 H-Score	0		Stain 2 H-Score	0		Stain 2 H-Score	0		Stain 2 H-Score	0		Stain 2 H-Score	0
		% Dual Positive Cells	0		% Dual Positive Cells	0		% Dual Positive Cells	0		% Dual Positive Cells	0		% Dual Positive Cells	0		% Dual Positive Cells	0		% Dual Positive Cells	0		% Dual Positive Cells	0
		% Dual Negative Cells	59.2134		% Dual Negative Cells	53.9023		% Dual Negative Cells	57.5638		% Dual Negative Cells	25.4381		% Dual Negative Cells	65.3597		% Dual Negative Cells	42.5662		% Dual Negative Cells	48.8729		% Dual Negative Cells	55.1591
		Avg Stain 1 Nuclear OD	0.206147		Avg Stain 1 Nuclear OD	0.239087		Avg Stain 1 Nuclear OD	0.233276		Avg Stain 1 Nuclear OD	0.358175		Avg Stain 1 Nuclear OD	0.183829		Avg Stain 1 Nuclear OD	0.270671		Avg Stain 1 Nuclear OD	0.270857		Avg Stain 1 Nuclear OD	0.23504
		Avg Stain 2 Nuclear OD	0.0483082		Avg Stain 2 Nuclear OD	0.0516031		Avg Stain 2 Nuclear OD	0.0523571		Avg Stain 2 Nuclear OD	0.0594949		Avg Stain 2 Nuclear OD	0.0458355		Avg Stain 2 Nuclear OD	0.0533297		Avg Stain 2 Nuclear OD	0.051751		Avg Stain 2 Nuclear OD	0.0500574
		Avg Stain 1 Cytoplasmic OD	0.0561728		Avg Stain 1 Cytoplasmic OD	0.0607953		Avg Stain 1 Cytoplasmic OD	0.0593025		Avg Stain 1 Cytoplasmic OD	0.0935029		Avg Stain 1 Cytoplasmic OD	0.0536645		Avg Stain 1 Cytoplasmic OD	0.0736514		Avg Stain 1 Cytoplasmic OD	0.0689611		Avg Stain 1 Cytoplasmic OD	0.0621336
		Avg Stain 2 Cytoplasmic OD	0.0321264		Avg Stain 2 Cytoplasmic OD	0.0322033		Avg Stain 2 Cytoplasmic OD	0.0323157		Avg Stain 2 Cytoplasmic OD	0.0332965		Avg Stain 2 Cytoplasmic OD	0.0321198		Avg Stain 2 Cytoplasmic OD	0.0327497		Avg Stain 2 Cytoplasmic OD	0.0322095		Avg Stain 2 Cytoplasmic OD	0.0322921
		Avg Cell Area (µm²)	104.583		Avg Cell Area (µm²)	105.558		Avg Cell Area (µm²)	105.482		Avg Cell Area (µm²)	124.043		Avg Cell Area (µm²)	103.953		Avg Cell Area (µm²)	115.055		Avg Cell Area (µm²)	106.246		Avg Cell Area (µm²)	103.281
		Avg Cytoplasm Area (µm²)	83.0272		Avg Cytoplasm Area (µm²)	83.0093		Avg Cytoplasm Area (µm²)	82.1473		Avg Cytoplasm Area (µm²)	87.8117		Avg Cytoplasm Area (µm²)	81.6814		Avg Cytoplasm Area (µm²)	85.3454		Avg Cytoplasm Area (µm²)	80.7758		Avg Cytoplasm Area (µm²)	79.9389
		Avg Nucleus Area (µm²)	21.5555		Avg Nucleus Area (µm²)	22.5485		Avg Nucleus Area (µm²)	23.3344		Avg Nucleus Area (µm²)	36.2315		Avg Nucleus Area (µm²)	22.2719		Avg Nucleus Area (µm²)	29.7092		Avg Nucleus Area (µm²)	25.4697		Avg Nucleus Area (µm²)	23.3419
		Avg Nucleus Perimeter (µm)	8.52865		Avg Nucleus Perimeter (µm)	8.92747		Avg Nucleus Perimeter (µm)	9.17743		Avg Nucleus Perimeter (µm)	13.7983		Avg Nucleus Perimeter (µm)	8.80298		Avg Nucleus Perimeter (µm)	11.4082		Avg Nucleus Perimeter (µm)	10.0015		Avg Nucleus Perimeter (µm)	9.19387
		Avg Nucleus Roundness	0.706382		Avg Nucleus Roundness	0.702914		Avg Nucleus Roundness	0.700988		Avg Nucleus Roundness	0.702727		Avg Nucleus Roundness	0.700581		Avg Nucleus Roundness	0.701511		Avg Nucleus Roundness	0.70046		Avg Nucleus Roundness	0.702225
		Tissue Area (µm²)	711797		Tissue Area (µm²)	453626		Tissue Area (µm²)	580061		Tissue Area (µm²)	467232		Tissue Area (µm²)	681385		Tissue Area (µm²)	647178		Tissue Area (µm²)	1443010		Tissue Area (µm²)	1504830
		tumour: Total Cells	2746		tumour: Total Cells	1781		tumour: Total Cells	2274		tumour: Total Cells	1655		tumour: Total Cells	2627		tumour: Total Cells	2455		tumour: Total Cells	5545		tumour: Total Cells	5941
		tumour: Stain 1 Positive Cells	1120		tumour: Stain 1 Positive Cells	821		tumour: Stain 1 Positive Cells	965		tumour: Stain 1 Positive Cells	1234		tumour: Stain 1 Positive Cells	910		tumour: Stain 1 Positive Cells	1410		tumour: Stain 1 Positive Cells	2835		tumour: Stain 1 Positive Cells	2664
		tumour: Stain 1 0+ Cells	1626		tumour: Stain 1 0+ Cells	960		tumour: Stain 1 0+ Cells	1309		tumour: Stain 1 0+ Cells	421		tumour: Stain 1 0+ Cells	1717		tumour: Stain 1 0+ Cells	1045		tumour: Stain 1 0+ Cells	2710		tumour: Stain 1 0+ Cells	3277
		tumour: Stain 1 1+ Cells	337		tumour: Stain 1 1+ Cells	215		tumour: Stain 1 1+ Cells	235		tumour: Stain 1 1+ Cells	323		tumour: Stain 1 1+ Cells	244		tumour: Stain 1 1+ Cells	444		tumour: Stain 1 1+ Cells	717		tumour: Stain 1 1+ Cells	638
		tumour: Stain 1 2+ Cells	400		tumour: Stain 1 2+ Cells	300		tumour: Stain 1 2+ Cells	320		tumour: Stain 1 2+ Cells	467		tumour: Stain 1 2+ Cells	332		tumour: Stain 1 2+ Cells	529		tumour: Stain 1 2+ Cells	968		tumour: Stain 1 2+ Cells	966
		tumour: Stain 1 3+ Cells	383		tumour: Stain 1 3+ Cells	306		tumour: Stain 1 3+ Cells	410		tumour: Stain 1 3+ Cells	444		tumour: Stain 1 3+ Cells	334		tumour: Stain 1 3+ Cells	437		tumour: Stain 1 3+ Cells	1150		tumour: Stain 1 3+ Cells	1060
		tumour: Stain 2 Positive Cells	0		tumour: Stain 2 Positive Cells	0		tumour: Stain 2 Positive Cells	0		tumour: Stain 2 Positive Cells	0		tumour: Stain 2 Positive Cells	0		tumour: Stain 2 Positive Cells	0		tumour: Stain 2 Positive Cells	0		tumour: Stain 2 Positive Cells	0
		tumour: Stain 2 0+ Cells	2746		tumour: Stain 2 0+ Cells	1781		tumour: Stain 2 0+ Cells	2274		tumour: Stain 2 0+ Cells	1655		tumour: Stain 2 0+ Cells	2627		tumour: Stain 2 0+ Cells	2455		tumour: Stain 2 0+ Cells	5545		tumour: Stain 2 0+ Cells	5941
		tumour: Stain 2 1+ Cells	0		tumour: Stain 2 1+ Cells	0		tumour: Stain 2 1+ Cells	0		tumour: Stain 2 1+ Cells	0		tumour: Stain 2 1+ Cells	0		tumour: Stain 2 1+ Cells	0		tumour: Stain 2 1+ Cells	0		tumour: Stain 2 1+ Cells	0
		tumour: Stain 2 2+ Cells	0		tumour: Stain 2 2+ Cells	0		tumour: Stain 2 2+ Cells	0		tumour: Stain 2 2+ Cells	0		tumour: Stain 2 2+ Cells	0		tumour: Stain 2 2+ Cells	0		tumour: Stain 2 2+ Cells	0		tumour: Stain 2 2+ Cells	0
		tumour: Stain 2 3+ Cells	0		tumour: Stain 2 3+ Cells	0		tumour: Stain 2 3+ Cells	0		tumour: Stain 2 3+ Cells	0		tumour: Stain 2 3+ Cells	0		tumour: Stain 2 3+ Cells	0		tumour: Stain 2 3+ Cells	0		tumour: Stain 2 3+ Cells	0
		tumour: Dual Positive Cells	0		tumour: Dual Positive Cells	0		tumour: Dual Positive Cells	0		tumour: Dual Positive Cells	0		tumour: Dual Positive Cells	0		tumour: Dual Positive Cells	0		tumour: Dual Positive Cells	0		tumour: Dual Positive Cells	0
		tumour: Dual Negative Cells	1626		tumour: Dual Negative Cells	960		tumour: Dual Negative Cells	1309		tumour: Dual Negative Cells	421		tumour: Dual Negative Cells	1717		tumour: Dual Negative Cells	1045		tumour: Dual Negative Cells	2710		tumour: Dual Negative Cells	3277
		tumour: % Stain 1 Positive Cells	40.7866		tumour: % Stain 1 Positive Cells	46.0977		tumour: % Stain 1 Positive Cells	42.4362		tumour: % Stain 1 Positive Cells	74.5619		tumour: % Stain 1 Positive Cells	34.6403		tumour: % Stain 1 Positive Cells	57.4338		tumour: % Stain 1 Positive Cells	51.1271		tumour: % Stain 1 Positive Cells	44.8409
		tumour: % Stain 1 0+ Cells	59.2134		tumour: % Stain 1 0+ Cells	53.9023		tumour: % Stain 1 0+ Cells	57.5638		tumour: % Stain 1 0+ Cells	25.4381		tumour: % Stain 1 0+ Cells	65.3597		tumour: % Stain 1 0+ Cells	42.5662		tumour: % Stain 1 0+ Cells	48.8729		tumour: % Stain 1 0+ Cells	55.1591
		tumour: % Stain 1 1+ Cells	12.2724		tumour: % Stain 1 1+ Cells	12.0719		tumour: % Stain 1 1+ Cells	10.3342		tumour: % Stain 1 1+ Cells	19.5166		tumour: % Stain 1 1+ Cells	9.28816		tumour: % Stain 1 1+ Cells	18.0855		tumour: % Stain 1 1+ Cells	12.9306		tumour: % Stain 1 1+ Cells	10.7389
		tumour: % Stain 1 2+ Cells	14.5666		tumour: % Stain 1 2+ Cells	16.8445		tumour: % Stain 1 2+ Cells	14.0721		tumour: % Stain 1 2+ Cells	28.2175		tumour: % Stain 1 2+ Cells	12.638		tumour: % Stain 1 2+ Cells	21.5479		tumour: % Stain 1 2+ Cells	17.4572		tumour: % Stain 1 2+ Cells	16.2599
		tumour: % Stain 1 3+ Cells	13.9476		tumour: % Stain 1 3+ Cells	17.1814		tumour: % Stain 1 3+ Cells	18.0299		tumour: % Stain 1 3+ Cells	26.8278		tumour: % Stain 1 3+ Cells	12.7141		tumour: % Stain 1 3+ Cells	17.8004		tumour: % Stain 1 3+ Cells	20.7394		tumour: % Stain 1 3+ Cells	17.8421
		tumour: Stain 1 H-Score	83.2484		tumour: Stain 1 H-Score	97.3049		tumour: Stain 1 H-Score	92.5682		tumour: Stain 1 H-Score	156.435		tumour: Stain 1 H-Score	72.7065		tumour: Stain 1 H-Score	114.582		tumour: Stain 1 H-Score	110.063		tumour: Stain 1 H-Score	96.7851
		tumour: % Stain 2 Positive Cells	0		tumour: % Stain 2 Positive Cells	0		tumour: % Stain 2 Positive Cells	0		tumour: % Stain 2 Positive Cells	0		tumour: % Stain 2 Positive Cells	0		tumour: % Stain 2 Positive Cells	0		tumour: % Stain 2 Positive Cells	0		tumour: % Stain 2 Positive Cells	0
		tumour: % Stain 2 0+ Cells	100		tumour: % Stain 2 0+ Cells	100		tumour: % Stain 2 0+ Cells	100		tumour: % Stain 2 0+ Cells	100		tumour: % Stain 2 0+ Cells	100		tumour: % Stain 2 0+ Cells	100		tumour: % Stain 2 0+ Cells	100		tumour: % Stain 2 0+ Cells	100
		tumour: % Stain 2 1+ Cells	0		tumour: % Stain 2 1+ Cells	0		tumour: % Stain 2 1+ Cells	0		tumour: % Stain 2 1+ Cells	0		tumour: % Stain 2 1+ Cells	0		tumour: % Stain 2 1+ Cells	0		tumour: % Stain 2 1+ Cells	0		tumour: % Stain 2 1+ Cells	0
		tumour: % Stain 2 2+ Cells	0		tumour: % Stain 2 2+ Cells	0		tumour: % Stain 2 2+ Cells	0		tumour: % Stain 2 2+ Cells	0		tumour: % Stain 2 2+ Cells	0		tumour: % Stain 2 2+ Cells	0		tumour: % Stain 2 2+ Cells	0		tumour: % Stain 2 2+ Cells	0
		tumour: % Stain 2 3+ Cells	0		tumour: % Stain 2 3+ Cells	0		tumour: % Stain 2 3+ Cells	0		tumour: % Stain 2 3+ Cells	0		tumour: % Stain 2 3+ Cells	0		tumour: % Stain 2 3+ Cells	0		tumour: % Stain 2 3+ Cells	0		tumour: % Stain 2 3+ Cells	0
		tumour: Stain 2 H-Score	0		tumour: Stain 2 H-Score	0		tumour: Stain 2 H-Score	0		tumour: Stain 2 H-Score	0		tumour: Stain 2 H-Score	0		tumour: Stain 2 H-Score	0		tumour: Stain 2 H-Score	0		tumour: Stain 2 H-Score	0
		tumour: % Dual Positive Cells	0		tumour: % Dual Positive Cells	0		tumour: % Dual Positive Cells	0		tumour: % Dual Positive Cells	0		tumour: % Dual Positive Cells	0		tumour: % Dual Positive Cells	0		tumour: % Dual Positive Cells	0		tumour: % Dual Positive Cells	0
		tumour: % Dual Negative Cells	59.2134		tumour: % Dual Negative Cells	53.9023		tumour: % Dual Negative Cells	57.5638		tumour: % Dual Negative Cells	25.4381		tumour: % Dual Negative Cells	65.3597		tumour: % Dual Negative Cells	42.5662		tumour: % Dual Negative Cells	48.8729		tumour: % Dual Negative Cells	55.1591
		tumour: Avg Stain 1 Nuclear OD	0.206147		tumour: Avg Stain 1 Nuclear OD	0.239087		tumour: Avg Stain 1 Nuclear OD	0.233276		tumour: Avg Stain 1 Nuclear OD	0.358175		tumour: Avg Stain 1 Nuclear OD	0.183829		tumour: Avg Stain 1 Nuclear OD	0.270671		tumour: Avg Stain 1 Nuclear OD	0.270857		tumour: Avg Stain 1 Nuclear OD	0.23504
		tumour: Avg Stain 2 Nuclear OD	0.0483082		tumour: Avg Stain 2 Nuclear OD	0.0516031		tumour: Avg Stain 2 Nuclear OD	0.0523571		tumour: Avg Stain 2 Nuclear OD	0.0594949		tumour: Avg Stain 2 Nuclear OD	0.0458355		tumour: Avg Stain 2 Nuclear OD	0.0533297		tumour: Avg Stain 2 Nuclear OD	0.051751		tumour: Avg Stain 2 Nuclear OD	0.0500574
		tumour: Avg Stain 1 Cytoplasmic OD	0.0561728		tumour: Avg Stain 1 Cytoplasmic OD	0.0607953		tumour: Avg Stain 1 Cytoplasmic OD	0.0593025		tumour: Avg Stain 1 Cytoplasmic OD	0.0935029		tumour: Avg Stain 1 Cytoplasmic OD	0.0536645		tumour: Avg Stain 1 Cytoplasmic OD	0.0736514		tumour: Avg Stain 1 Cytoplasmic OD	0.0689611		tumour: Avg Stain 1 Cytoplasmic OD	0.0621336
		tumour: Avg Stain 2 Cytoplasmic OD	0.0321264		tumour: Avg Stain 2 Cytoplasmic OD	0.0322033		tumour: Avg Stain 2 Cytoplasmic OD	0.0323157		tumour: Avg Stain 2 Cytoplasmic OD	0.0332965		tumour: Avg Stain 2 Cytoplasmic OD	0.0321198		tumour: Avg Stain 2 Cytoplasmic OD	0.0327497		tumour: Avg Stain 2 Cytoplasmic OD	0.0322095		tumour: Avg Stain 2 Cytoplasmic OD	0.0322921
		tumour: Avg Cell Area (µm²)	104.583		tumour: Avg Cell Area (µm²)	105.558		tumour: Avg Cell Area (µm²)	105.482		tumour: Avg Cell Area (µm²)	124.043		tumour: Avg Cell Area (µm²)	103.953		tumour: Avg Cell Area (µm²)	115.055		tumour: Avg Cell Area (µm²)	106.246		tumour: Avg Cell Area (µm²)	103.281
		tumour: Avg Cytoplasm Area (µm²)	83.0272		tumour: Avg Cytoplasm Area (µm²)	83.0093		tumour: Avg Cytoplasm Area (µm²)	82.1473		tumour: Avg Cytoplasm Area (µm²)	87.8117		tumour: Avg Cytoplasm Area (µm²)	81.6814		tumour: Avg Cytoplasm Area (µm²)	85.3454		tumour: Avg Cytoplasm Area (µm²)	80.7758		tumour: Avg Cytoplasm Area (µm²)	79.9389
		tumour: Avg Nucleus Area (µm²)	21.5555		tumour: Avg Nucleus Area (µm²)	22.5485		tumour: Avg Nucleus Area (µm²)	23.3344		tumour: Avg Nucleus Area (µm²)	36.2315		tumour: Avg Nucleus Area (µm²)	22.2719		tumour: Avg Nucleus Area (µm²)	29.7092		tumour: Avg Nucleus Area (µm²)	25.4697		tumour: Avg Nucleus Area (µm²)	23.3419
		tumour: Avg Nucleus Perimeter (µm)	8.52865		tumour: Avg Nucleus Perimeter (µm)	8.92747		tumour: Avg Nucleus Perimeter (µm)	9.17743		tumour: Avg Nucleus Perimeter (µm)	13.7983		tumour: Avg Nucleus Perimeter (µm)	8.80298		tumour: Avg Nucleus Perimeter (µm)	11.4082		tumour: Avg Nucleus Perimeter (µm)	10.0015		tumour: Avg Nucleus Perimeter (µm)	9.19387
		tumour: Avg Nucleus Roundness	0.706382		tumour: Avg Nucleus Roundness	0.702914		tumour: Avg Nucleus Roundness	0.700988		tumour: Avg Nucleus Roundness	0.702727		tumour: Avg Nucleus Roundness	0.700581		tumour: Avg Nucleus Roundness	0.701511		tumour: Avg Nucleus Roundness	0.70046		tumour: Avg Nucleus Roundness	0.702225
		tumour: Tissue Area (µm²)	711797		tumour: Tissue Area (µm²)	453626		tumour: Tissue Area (µm²)	580061		tumour: Tissue Area (µm²)	467232		tumour: Tissue Area (µm²)	681385		tumour: Tissue Area (µm²)	647178		tumour: Tissue Area (µm²)	1443010		tumour: Tissue Area (µm²)	1504830
		BSNA9.1d	HOM
		Name	Value		Name	Value		Name	Value		Name	Value		Name	Value		Name	Value		Name	Value		Name	Value
		Classified Area (mm²)	1.61592		Classified Area (mm²)	1.18642		Classified Area (mm²)	1.68807		Classified Area (mm²)	1.93571		Classified Area (mm²)	2.05934		Classified Area (mm²)	1.82122		Classified Area (mm²)	1.82711		Classified Area (mm²)	0.9624
		tumour Area (mm²)	1.55753		tumour Area (mm²)	1.17669		tumour Area (mm²)	1.68548		tumour Area (mm²)	1.77544		tumour Area (mm²)	1.98604		tumour Area (mm²)	1.74325		tumour Area (mm²)	1.80695		tumour Area (mm²)	0.95445
		empty Area (mm²)	0.04225		empty Area (mm²)	0.00868		empty Area (mm²)	0.00046		empty Area (mm²)	0.05164		empty Area (mm²)	0.0015		empty Area (mm²)	0.00039		empty Area (mm²)	0.00039		empty Area (mm²)	0.00718
		necrosis Area (mm²)	0.00291		necrosis Area (mm²)	6e-05		necrosis Area (mm²)	0.00011		necrosis Area (mm²)	0.01233		necrosis Area (mm²)	0		necrosis Area (mm²)	0.00599		necrosis Area (mm²)	0.00072		necrosis Area (mm²)	0.00015
		normal Area (mm²)	0.01323		normal Area (mm²)	0.001		normal Area (mm²)	0.00202		normal Area (mm²)	0.0963		normal Area (mm²)	0.0718		normal Area (mm²)	0.07158		normal Area (mm²)	0.01905		normal Area (mm²)	0.00062
		Total Cells	5800		Total Cells	4331		Total Cells	6110		Total Cells	5933		Total Cells	8466		Total Cells	5731		Total Cells	6824		Total Cells	3571
		Stain 1 Positive Cells	3200		Stain 1 Positive Cells	2846		Stain 1 Positive Cells	3817		Stain 1 Positive Cells	1479		Stain 1 Positive Cells	3362		Stain 1 Positive Cells	2322		Stain 1 Positive Cells	3142		Stain 1 Positive Cells	1981
		Stain 1 0+ Cells	2600		Stain 1 0+ Cells	1485		Stain 1 0+ Cells	2293		Stain 1 0+ Cells	4454		Stain 1 0+ Cells	5104		Stain 1 0+ Cells	3409		Stain 1 0+ Cells	3682		Stain 1 0+ Cells	1590
		Stain 1 1+ Cells	765		Stain 1 1+ Cells	727		Stain 1 1+ Cells	1053		Stain 1 1+ Cells	410		Stain 1 1+ Cells	955		Stain 1 1+ Cells	625		Stain 1 1+ Cells	970		Stain 1 1+ Cells	539
		Stain 1 2+ Cells	1034		Stain 1 2+ Cells	984		Stain 1 2+ Cells	1189		Stain 1 2+ Cells	441		Stain 1 2+ Cells	1129		Stain 1 2+ Cells	726		Stain 1 2+ Cells	1119		Stain 1 2+ Cells	642
		Stain 1 3+ Cells	1401		Stain 1 3+ Cells	1135		Stain 1 3+ Cells	1575		Stain 1 3+ Cells	628		Stain 1 3+ Cells	1278		Stain 1 3+ Cells	971		Stain 1 3+ Cells	1053		Stain 1 3+ Cells	800
		Stain 2 Positive Cells	0		Stain 2 Positive Cells	0		Stain 2 Positive Cells	0		Stain 2 Positive Cells	0		Stain 2 Positive Cells	0		Stain 2 Positive Cells	0		Stain 2 Positive Cells	0		Stain 2 Positive Cells	0
		Stain 2 0+ Cells	5800		Stain 2 0+ Cells	4331		Stain 2 0+ Cells	6110		Stain 2 0+ Cells	5933		Stain 2 0+ Cells	8466		Stain 2 0+ Cells	5731		Stain 2 0+ Cells	6824		Stain 2 0+ Cells	3571
		Stain 2 1+ Cells	0		Stain 2 1+ Cells	0		Stain 2 1+ Cells	0		Stain 2 1+ Cells	0		Stain 2 1+ Cells	0		Stain 2 1+ Cells	0		Stain 2 1+ Cells	0		Stain 2 1+ Cells	0
		Stain 2 2+ Cells	0		Stain 2 2+ Cells	0		Stain 2 2+ Cells	0		Stain 2 2+ Cells	0		Stain 2 2+ Cells	0		Stain 2 2+ Cells	0		Stain 2 2+ Cells	0		Stain 2 2+ Cells	0
		Stain 2 3+ Cells	0		Stain 2 3+ Cells	0		Stain 2 3+ Cells	0		Stain 2 3+ Cells	0		Stain 2 3+ Cells	0		Stain 2 3+ Cells	0		Stain 2 3+ Cells	0		Stain 2 3+ Cells	0
		Dual Positive Cells	0		Dual Positive Cells	0		Dual Positive Cells	0		Dual Positive Cells	0		Dual Positive Cells	0		Dual Positive Cells	0		Dual Positive Cells	0		Dual Positive Cells	0
		Dual Negative Cells	2600		Dual Negative Cells	1485		Dual Negative Cells	2293		Dual Negative Cells	4454		Dual Negative Cells	5104		Dual Negative Cells	3409		Dual Negative Cells	3682		Dual Negative Cells	1590
		% Stain 1 Positive Cells	55.1724		% Stain 1 Positive Cells	65.7123		% Stain 1 Positive Cells	62.4714		% Stain 1 Positive Cells	24.9284		% Stain 1 Positive Cells	39.7118		% Stain 1 Positive Cells	40.5165		% Stain 1 Positive Cells	46.0434		% Stain 1 Positive Cells	55.4747		48.7539
		% Stain 1 0+ Cells	44.8276		% Stain 1 0+ Cells	34.2877		% Stain 1 0+ Cells	37.5286		% Stain 1 0+ Cells	75.0716		% Stain 1 0+ Cells	60.2882		% Stain 1 0+ Cells	59.4835		% Stain 1 0+ Cells	53.9566		% Stain 1 0+ Cells	44.5253
		% Stain 1 1+ Cells	13.1897		% Stain 1 1+ Cells	16.786		% Stain 1 1+ Cells	17.234		% Stain 1 1+ Cells	6.9105		% Stain 1 1+ Cells	11.2804		% Stain 1 1+ Cells	10.9056		% Stain 1 1+ Cells	14.2145		% Stain 1 1+ Cells	15.0938
		% Stain 1 2+ Cells	17.8276		% Stain 1 2+ Cells	22.7199		% Stain 1 2+ Cells	19.4599		% Stain 1 2+ Cells	7.433		% Stain 1 2+ Cells	13.3357		% Stain 1 2+ Cells	12.6679		% Stain 1 2+ Cells	16.398		% Stain 1 2+ Cells	17.9782
		% Stain 1 3+ Cells	24.1552		% Stain 1 3+ Cells	26.2064		% Stain 1 3+ Cells	25.7774		% Stain 1 3+ Cells	10.5849		% Stain 1 3+ Cells	15.0957		% Stain 1 3+ Cells	16.9429		% Stain 1 3+ Cells	15.4308		% Stain 1 3+ Cells	22.4027
		Stain 1 H-Score	121.31		Stain 1 H-Score	140.845		Stain 1 H-Score	133.486		Stain 1 H-Score	53.5311		Stain 1 H-Score	83.2388		Stain 1 H-Score	87.0703		Stain 1 H-Score	93.303		Stain 1 H-Score	118.258
		% Stain 2 Positive Cells	0		% Stain 2 Positive Cells	0		% Stain 2 Positive Cells	0		% Stain 2 Positive Cells	0		% Stain 2 Positive Cells	0		% Stain 2 Positive Cells	0		% Stain 2 Positive Cells	0		% Stain 2 Positive Cells	0
		% Stain 2 0+ Cells	100		% Stain 2 0+ Cells	100		% Stain 2 0+ Cells	100		% Stain 2 0+ Cells	100		% Stain 2 0+ Cells	100		% Stain 2 0+ Cells	100		% Stain 2 0+ Cells	100		% Stain 2 0+ Cells	100
		% Stain 2 1+ Cells	0		% Stain 2 1+ Cells	0		% Stain 2 1+ Cells	0		% Stain 2 1+ Cells	0		% Stain 2 1+ Cells	0		% Stain 2 1+ Cells	0		% Stain 2 1+ Cells	0		% Stain 2 1+ Cells	0
		% Stain 2 2+ Cells	0		% Stain 2 2+ Cells	0		% Stain 2 2+ Cells	0		% Stain 2 2+ Cells	0		% Stain 2 2+ Cells	0		% Stain 2 2+ Cells	0		% Stain 2 2+ Cells	0		% Stain 2 2+ Cells	0
		% Stain 2 3+ Cells	0		% Stain 2 3+ Cells	0		% Stain 2 3+ Cells	0		% Stain 2 3+ Cells	0		% Stain 2 3+ Cells	0		% Stain 2 3+ Cells	0		% Stain 2 3+ Cells	0		% Stain 2 3+ Cells	0
		Stain 2 H-Score	0		Stain 2 H-Score	0		Stain 2 H-Score	0		Stain 2 H-Score	0		Stain 2 H-Score	0		Stain 2 H-Score	0		Stain 2 H-Score	0		Stain 2 H-Score	0
		% Dual Positive Cells	0		% Dual Positive Cells	0		% Dual Positive Cells	0		% Dual Positive Cells	0		% Dual Positive Cells	0		% Dual Positive Cells	0		% Dual Positive Cells	0		% Dual Positive Cells	0
		% Dual Negative Cells	44.8276		% Dual Negative Cells	34.2877		% Dual Negative Cells	37.5286		% Dual Negative Cells	75.0716		% Dual Negative Cells	60.2882		% Dual Negative Cells	59.4835		% Dual Negative Cells	53.9566		% Dual Negative Cells	44.5253
		Avg Stain 1 Nuclear OD	0.295052		Avg Stain 1 Nuclear OD	0.333199		Avg Stain 1 Nuclear OD	0.31919		Avg Stain 1 Nuclear OD	0.148517		Avg Stain 1 Nuclear OD	0.209778		Avg Stain 1 Nuclear OD	0.221288		Avg Stain 1 Nuclear OD	0.227941		Avg Stain 1 Nuclear OD	0.287854
		Avg Stain 2 Nuclear OD	0.055094		Avg Stain 2 Nuclear OD	0.0578382		Avg Stain 2 Nuclear OD	0.0582245		Avg Stain 2 Nuclear OD	0.044614		Avg Stain 2 Nuclear OD	0.0481315		Avg Stain 2 Nuclear OD	0.0496058		Avg Stain 2 Nuclear OD	0.0497695		Avg Stain 2 Nuclear OD	0.0555292
		Avg Stain 1 Cytoplasmic OD	0.0749636		Avg Stain 1 Cytoplasmic OD	0.0821852		Avg Stain 1 Cytoplasmic OD	0.0741784		Avg Stain 1 Cytoplasmic OD	0.0487056		Avg Stain 1 Cytoplasmic OD	0.0576944		Avg Stain 1 Cytoplasmic OD	0.0615909		Avg Stain 1 Cytoplasmic OD	0.0610793		Avg Stain 1 Cytoplasmic OD	0.0674821
		Avg Stain 2 Cytoplasmic OD	0.0330882		Avg Stain 2 Cytoplasmic OD	0.0327044		Avg Stain 2 Cytoplasmic OD	0.0326508		Avg Stain 2 Cytoplasmic OD	0.0324218		Avg Stain 2 Cytoplasmic OD	0.0323553		Avg Stain 2 Cytoplasmic OD	0.0325296		Avg Stain 2 Cytoplasmic OD	0.0326797		Avg Stain 2 Cytoplasmic OD	0.0326806
		Avg Cell Area (µm²)	113.238		Avg Cell Area (µm²)	108.44		Avg Cell Area (µm²)	109.851		Avg Cell Area (µm²)	104.813		Avg Cell Area (µm²)	99.4673		Avg Cell Area (µm²)	118.887		Avg Cell Area (µm²)	103.504		Avg Cell Area (µm²)	105.352
		Avg Cytoplasm Area (µm²)	82.2901		Avg Cytoplasm Area (µm²)	79.0777		Avg Cytoplasm Area (µm²)	83.2166		Avg Cytoplasm Area (µm²)	78.8995		Avg Cytoplasm Area (µm²)	77.125		Avg Cytoplasm Area (µm²)	85.6284		Avg Cytoplasm Area (µm²)	78.3609		Avg Cytoplasm Area (µm²)	81.2024
		Avg Nucleus Area (µm²)	30.9478		Avg Nucleus Area (µm²)	29.3624		Avg Nucleus Area (µm²)	26.6343		Avg Nucleus Area (µm²)	25.9139		Avg Nucleus Area (µm²)	22.3423		Avg Nucleus Area (µm²)	33.2585		Avg Nucleus Area (µm²)	25.1433		Avg Nucleus Area (µm²)	24.1496
		Avg Nucleus Perimeter (µm)	11.8131		Avg Nucleus Perimeter (µm)	11.4217		Avg Nucleus Perimeter (µm)	10.3967		Avg Nucleus Perimeter (µm)	10.1168		Avg Nucleus Perimeter (µm)	8.80666		Avg Nucleus Perimeter (µm)	12.636		Avg Nucleus Perimeter (µm)	9.84698		Avg Nucleus Perimeter (µm)	9.48812
		Avg Nucleus Roundness	0.69487		Avg Nucleus Roundness	0.70408		Avg Nucleus Roundness	0.704543		Avg Nucleus Roundness	0.701169		Avg Nucleus Roundness	0.69738		Avg Nucleus Roundness	0.696417		Avg Nucleus Roundness	0.698372		Avg Nucleus Roundness	0.703137
		Tissue Area (µm²)	1447690		Tissue Area (µm²)	1079840		Tissue Area (µm²)	1596330		Tissue Area (µm²)	1446110		Tissue Area (µm²)	1945300		Tissue Area (µm²)	1524710		Tissue Area (µm²)	1602090		Tissue Area (µm²)	878795
		tumour: Total Cells	5800		tumour: Total Cells	4331		tumour: Total Cells	6110		tumour: Total Cells	5933		tumour: Total Cells	8466		tumour: Total Cells	5731		tumour: Total Cells	6824		tumour: Total Cells	3571
		tumour: Stain 1 Positive Cells	3200		tumour: Stain 1 Positive Cells	2846		tumour: Stain 1 Positive Cells	3817		tumour: Stain 1 Positive Cells	1479		tumour: Stain 1 Positive Cells	3362		tumour: Stain 1 Positive Cells	2322		tumour: Stain 1 Positive Cells	3142		tumour: Stain 1 Positive Cells	1981
		tumour: Stain 1 0+ Cells	2600		tumour: Stain 1 0+ Cells	1485		tumour: Stain 1 0+ Cells	2293		tumour: Stain 1 0+ Cells	4454		tumour: Stain 1 0+ Cells	5104		tumour: Stain 1 0+ Cells	3409		tumour: Stain 1 0+ Cells	3682		tumour: Stain 1 0+ Cells	1590
		tumour: Stain 1 1+ Cells	765		tumour: Stain 1 1+ Cells	727		tumour: Stain 1 1+ Cells	1053		tumour: Stain 1 1+ Cells	410		tumour: Stain 1 1+ Cells	955		tumour: Stain 1 1+ Cells	625		tumour: Stain 1 1+ Cells	970		tumour: Stain 1 1+ Cells	539
		tumour: Stain 1 2+ Cells	1034		tumour: Stain 1 2+ Cells	984		tumour: Stain 1 2+ Cells	1189		tumour: Stain 1 2+ Cells	441		tumour: Stain 1 2+ Cells	1129		tumour: Stain 1 2+ Cells	726		tumour: Stain 1 2+ Cells	1119		tumour: Stain 1 2+ Cells	642
		tumour: Stain 1 3+ Cells	1401		tumour: Stain 1 3+ Cells	1135		tumour: Stain 1 3+ Cells	1575		tumour: Stain 1 3+ Cells	628		tumour: Stain 1 3+ Cells	1278		tumour: Stain 1 3+ Cells	971		tumour: Stain 1 3+ Cells	1053		tumour: Stain 1 3+ Cells	800
		tumour: Stain 2 Positive Cells	0		tumour: Stain 2 Positive Cells	0		tumour: Stain 2 Positive Cells	0		tumour: Stain 2 Positive Cells	0		tumour: Stain 2 Positive Cells	0		tumour: Stain 2 Positive Cells	0		tumour: Stain 2 Positive Cells	0		tumour: Stain 2 Positive Cells	0
		tumour: Stain 2 0+ Cells	5800		tumour: Stain 2 0+ Cells	4331		tumour: Stain 2 0+ Cells	6110		tumour: Stain 2 0+ Cells	5933		tumour: Stain 2 0+ Cells	8466		tumour: Stain 2 0+ Cells	5731		tumour: Stain 2 0+ Cells	6824		tumour: Stain 2 0+ Cells	3571
		tumour: Stain 2 1+ Cells	0		tumour: Stain 2 1+ Cells	0		tumour: Stain 2 1+ Cells	0		tumour: Stain 2 1+ Cells	0		tumour: Stain 2 1+ Cells	0		tumour: Stain 2 1+ Cells	0		tumour: Stain 2 1+ Cells	0		tumour: Stain 2 1+ Cells	0
		tumour: Stain 2 2+ Cells	0		tumour: Stain 2 2+ Cells	0		tumour: Stain 2 2+ Cells	0		tumour: Stain 2 2+ Cells	0		tumour: Stain 2 2+ Cells	0		tumour: Stain 2 2+ Cells	0		tumour: Stain 2 2+ Cells	0		tumour: Stain 2 2+ Cells	0
		tumour: Stain 2 3+ Cells	0		tumour: Stain 2 3+ Cells	0		tumour: Stain 2 3+ Cells	0		tumour: Stain 2 3+ Cells	0		tumour: Stain 2 3+ Cells	0		tumour: Stain 2 3+ Cells	0		tumour: Stain 2 3+ Cells	0		tumour: Stain 2 3+ Cells	0
		tumour: Dual Positive Cells	0		tumour: Dual Positive Cells	0		tumour: Dual Positive Cells	0		tumour: Dual Positive Cells	0		tumour: Dual Positive Cells	0		tumour: Dual Positive Cells	0		tumour: Dual Positive Cells	0		tumour: Dual Positive Cells	0
		tumour: Dual Negative Cells	2600		tumour: Dual Negative Cells	1485		tumour: Dual Negative Cells	2293		tumour: Dual Negative Cells	4454		tumour: Dual Negative Cells	5104		tumour: Dual Negative Cells	3409		tumour: Dual Negative Cells	3682		tumour: Dual Negative Cells	1590
		tumour: % Stain 1 Positive Cells	55.1724		tumour: % Stain 1 Positive Cells	65.7123		tumour: % Stain 1 Positive Cells	62.4714		tumour: % Stain 1 Positive Cells	24.9284		tumour: % Stain 1 Positive Cells	39.7118		tumour: % Stain 1 Positive Cells	40.5165		tumour: % Stain 1 Positive Cells	46.0434		tumour: % Stain 1 Positive Cells	55.4747
		tumour: % Stain 1 0+ Cells	44.8276		tumour: % Stain 1 0+ Cells	34.2877		tumour: % Stain 1 0+ Cells	37.5286		tumour: % Stain 1 0+ Cells	75.0716		tumour: % Stain 1 0+ Cells	60.2882		tumour: % Stain 1 0+ Cells	59.4835		tumour: % Stain 1 0+ Cells	53.9566		tumour: % Stain 1 0+ Cells	44.5253
		tumour: % Stain 1 1+ Cells	13.1897		tumour: % Stain 1 1+ Cells	16.786		tumour: % Stain 1 1+ Cells	17.234		tumour: % Stain 1 1+ Cells	6.9105		tumour: % Stain 1 1+ Cells	11.2804		tumour: % Stain 1 1+ Cells	10.9056		tumour: % Stain 1 1+ Cells	14.2145		tumour: % Stain 1 1+ Cells	15.0938
		tumour: % Stain 1 2+ Cells	17.8276		tumour: % Stain 1 2+ Cells	22.7199		tumour: % Stain 1 2+ Cells	19.4599		tumour: % Stain 1 2+ Cells	7.433		tumour: % Stain 1 2+ Cells	13.3357		tumour: % Stain 1 2+ Cells	12.6679		tumour: % Stain 1 2+ Cells	16.398		tumour: % Stain 1 2+ Cells	17.9782
		tumour: % Stain 1 3+ Cells	24.1552		tumour: % Stain 1 3+ Cells	26.2064		tumour: % Stain 1 3+ Cells	25.7774		tumour: % Stain 1 3+ Cells	10.5849		tumour: % Stain 1 3+ Cells	15.0957		tumour: % Stain 1 3+ Cells	16.9429		tumour: % Stain 1 3+ Cells	15.4308		tumour: % Stain 1 3+ Cells	22.4027
		tumour: Stain 1 H-Score	121.31		tumour: Stain 1 H-Score	140.845		tumour: Stain 1 H-Score	133.486		tumour: Stain 1 H-Score	53.5311		tumour: Stain 1 H-Score	83.2388		tumour: Stain 1 H-Score	87.0703		tumour: Stain 1 H-Score	93.303		tumour: Stain 1 H-Score	118.258
		tumour: % Stain 2 Positive Cells	0		tumour: % Stain 2 Positive Cells	0		tumour: % Stain 2 Positive Cells	0		tumour: % Stain 2 Positive Cells	0		tumour: % Stain 2 Positive Cells	0		tumour: % Stain 2 Positive Cells	0		tumour: % Stain 2 Positive Cells	0		tumour: % Stain 2 Positive Cells	0
		tumour: % Stain 2 0+ Cells	100		tumour: % Stain 2 0+ Cells	100		tumour: % Stain 2 0+ Cells	100		tumour: % Stain 2 0+ Cells	100		tumour: % Stain 2 0+ Cells	100		tumour: % Stain 2 0+ Cells	100		tumour: % Stain 2 0+ Cells	100		tumour: % Stain 2 0+ Cells	100
		tumour: % Stain 2 1+ Cells	0		tumour: % Stain 2 1+ Cells	0		tumour: % Stain 2 1+ Cells	0		tumour: % Stain 2 1+ Cells	0		tumour: % Stain 2 1+ Cells	0		tumour: % Stain 2 1+ Cells	0		tumour: % Stain 2 1+ Cells	0		tumour: % Stain 2 1+ Cells	0
		tumour: % Stain 2 2+ Cells	0		tumour: % Stain 2 2+ Cells	0		tumour: % Stain 2 2+ Cells	0		tumour: % Stain 2 2+ Cells	0		tumour: % Stain 2 2+ Cells	0		tumour: % Stain 2 2+ Cells	0		tumour: % Stain 2 2+ Cells	0		tumour: % Stain 2 2+ Cells	0
		tumour: % Stain 2 3+ Cells	0		tumour: % Stain 2 3+ Cells	0		tumour: % Stain 2 3+ Cells	0		tumour: % Stain 2 3+ Cells	0		tumour: % Stain 2 3+ Cells	0		tumour: % Stain 2 3+ Cells	0		tumour: % Stain 2 3+ Cells	0		tumour: % Stain 2 3+ Cells	0
		tumour: Stain 2 H-Score	0		tumour: Stain 2 H-Score	0		tumour: Stain 2 H-Score	0		tumour: Stain 2 H-Score	0		tumour: Stain 2 H-Score	0		tumour: Stain 2 H-Score	0		tumour: Stain 2 H-Score	0		tumour: Stain 2 H-Score	0
		tumour: % Dual Positive Cells	0		tumour: % Dual Positive Cells	0		tumour: % Dual Positive Cells	0		tumour: % Dual Positive Cells	0		tumour: % Dual Positive Cells	0		tumour: % Dual Positive Cells	0		tumour: % Dual Positive Cells	0		tumour: % Dual Positive Cells	0
		tumour: % Dual Negative Cells	44.8276		tumour: % Dual Negative Cells	34.2877		tumour: % Dual Negative Cells	37.5286		tumour: % Dual Negative Cells	75.0716		tumour: % Dual Negative Cells	60.2882		tumour: % Dual Negative Cells	59.4835		tumour: % Dual Negative Cells	53.9566		tumour: % Dual Negative Cells	44.5253
		tumour: Avg Stain 1 Nuclear OD	0.295052		tumour: Avg Stain 1 Nuclear OD	0.333199		tumour: Avg Stain 1 Nuclear OD	0.31919		tumour: Avg Stain 1 Nuclear OD	0.148517		tumour: Avg Stain 1 Nuclear OD	0.209778		tumour: Avg Stain 1 Nuclear OD	0.221288		tumour: Avg Stain 1 Nuclear OD	0.227941		tumour: Avg Stain 1 Nuclear OD	0.287854
		tumour: Avg Stain 2 Nuclear OD	0.055094		tumour: Avg Stain 2 Nuclear OD	0.0578382		tumour: Avg Stain 2 Nuclear OD	0.0582245		tumour: Avg Stain 2 Nuclear OD	0.044614		tumour: Avg Stain 2 Nuclear OD	0.0481315		tumour: Avg Stain 2 Nuclear OD	0.0496058		tumour: Avg Stain 2 Nuclear OD	0.0497695		tumour: Avg Stain 2 Nuclear OD	0.0555292
		tumour: Avg Stain 1 Cytoplasmic OD	0.0749636		tumour: Avg Stain 1 Cytoplasmic OD	0.0821852		tumour: Avg Stain 1 Cytoplasmic OD	0.0741784		tumour: Avg Stain 1 Cytoplasmic OD	0.0487056		tumour: Avg Stain 1 Cytoplasmic OD	0.0576944		tumour: Avg Stain 1 Cytoplasmic OD	0.0615909		tumour: Avg Stain 1 Cytoplasmic OD	0.0610793		tumour: Avg Stain 1 Cytoplasmic OD	0.0674821
		tumour: Avg Stain 2 Cytoplasmic OD	0.0330882		tumour: Avg Stain 2 Cytoplasmic OD	0.0327044		tumour: Avg Stain 2 Cytoplasmic OD	0.0326508		tumour: Avg Stain 2 Cytoplasmic OD	0.0324218		tumour: Avg Stain 2 Cytoplasmic OD	0.0323553		tumour: Avg Stain 2 Cytoplasmic OD	0.0325296		tumour: Avg Stain 2 Cytoplasmic OD	0.0326797		tumour: Avg Stain 2 Cytoplasmic OD	0.0326806
		tumour: Avg Cell Area (µm²)	113.238		tumour: Avg Cell Area (µm²)	108.44		tumour: Avg Cell Area (µm²)	109.851		tumour: Avg Cell Area (µm²)	104.813		tumour: Avg Cell Area (µm²)	99.4673		tumour: Avg Cell Area (µm²)	118.887		tumour: Avg Cell Area (µm²)	103.504		tumour: Avg Cell Area (µm²)	105.352
		tumour: Avg Cytoplasm Area (µm²)	82.2901		tumour: Avg Cytoplasm Area (µm²)	79.0777		tumour: Avg Cytoplasm Area (µm²)	83.2166		tumour: Avg Cytoplasm Area (µm²)	78.8995		tumour: Avg Cytoplasm Area (µm²)	77.125		tumour: Avg Cytoplasm Area (µm²)	85.6284		tumour: Avg Cytoplasm Area (µm²)	78.3609		tumour: Avg Cytoplasm Area (µm²)	81.2024
		tumour: Avg Nucleus Area (µm²)	30.9478		tumour: Avg Nucleus Area (µm²)	29.3624		tumour: Avg Nucleus Area (µm²)	26.6343		tumour: Avg Nucleus Area (µm²)	25.9139		tumour: Avg Nucleus Area (µm²)	22.3423		tumour: Avg Nucleus Area (µm²)	33.2585		tumour: Avg Nucleus Area (µm²)	25.1433		tumour: Avg Nucleus Area (µm²)	24.1496
		tumour: Avg Nucleus Perimeter (µm)	11.8131		tumour: Avg Nucleus Perimeter (µm)	11.4217		tumour: Avg Nucleus Perimeter (µm)	10.3967		tumour: Avg Nucleus Perimeter (µm)	10.1168		tumour: Avg Nucleus Perimeter (µm)	8.80666		tumour: Avg Nucleus Perimeter (µm)	12.636		tumour: Avg Nucleus Perimeter (µm)	9.84698		tumour: Avg Nucleus Perimeter (µm)	9.48812
		tumour: Avg Nucleus Roundness	0.69487		tumour: Avg Nucleus Roundness	0.70408		tumour: Avg Nucleus Roundness	0.704543		tumour: Avg Nucleus Roundness	0.701169		tumour: Avg Nucleus Roundness	0.69738		tumour: Avg Nucleus Roundness	0.696417		tumour: Avg Nucleus Roundness	0.698372		tumour: Avg Nucleus Roundness	0.703137
		tumour: Tissue Area (µm²)	1447690		tumour: Tissue Area (µm²)	1079840		tumour: Tissue Area (µm²)	1596330					tumour: Tissue Area (µm²)	1945300		tumour: Tissue Area (µm²)	1524710		tumour: Tissue Area (µm²)	1602090		tumour: Tissue Area (µm²)	878795
		BSNA8.1f	HOM
		Name	Value		Name	Value		Name	Value		Name	Value		Name	Value		Name	Value		Name	Value		Name	Value
		Classified Area (mm²)	0.71132		Classified Area (mm²)	1.10449		Classified Area (mm²)	0.64848		Classified Area (mm²)	0.94138		Classified Area (mm²)	0.5245		Classified Area (mm²)	0.65644		Classified Area (mm²)	1.67046		Classified Area (mm²)	1.79256
		tumour Area (mm²)	0.71114		tumour Area (mm²)	1.1025		tumour Area (mm²)	0.64704		tumour Area (mm²)	0.93871		tumour Area (mm²)	0.50882		tumour Area (mm²)	0.6283		tumour Area (mm²)	1.64334		tumour Area (mm²)	1.76578
		empty Area (mm²)	0		empty Area (mm²)	0		empty Area (mm²)	0.00029		empty Area (mm²)	0.00052		empty Area (mm²)	3e-05		empty Area (mm²)	0.01739		empty Area (mm²)	0.00353		empty Area (mm²)	0.0013
		necrosis Area (mm²)	0		necrosis Area (mm²)	0		necrosis Area (mm²)	8e-05		necrosis Area (mm²)	0		necrosis Area (mm²)	0		necrosis Area (mm²)	0.0095		necrosis Area (mm²)	0.01302		necrosis Area (mm²)	0.00023
		normal Area (mm²)	0.00018		normal Area (mm²)	0.002		normal Area (mm²)	0.00107		normal Area (mm²)	0.00215		normal Area (mm²)	0.01565		normal Area (mm²)	0.00126		normal Area (mm²)	0.01058		normal Area (mm²)	0.02525
		Total Cells	2448		Total Cells	3864		Total Cells	2414		Total Cells	3466		Total Cells	1965		Total Cells	2130		Total Cells	5998		Total Cells	6229
		Stain 1 Positive Cells	1338		Stain 1 Positive Cells	2038		Stain 1 Positive Cells	1211		Stain 1 Positive Cells	1663		Stain 1 Positive Cells	783		Stain 1 Positive Cells	843		Stain 1 Positive Cells	2875		Stain 1 Positive Cells	2760
		Stain 1 0+ Cells	1110		Stain 1 0+ Cells	1826		Stain 1 0+ Cells	1203		Stain 1 0+ Cells	1803		Stain 1 0+ Cells	1182		Stain 1 0+ Cells	1287		Stain 1 0+ Cells	3123		Stain 1 0+ Cells	3469
		Stain 1 1+ Cells	579		Stain 1 1+ Cells	772		Stain 1 1+ Cells	488		Stain 1 1+ Cells	694		Stain 1 1+ Cells	301		Stain 1 1+ Cells	263		Stain 1 1+ Cells	848		Stain 1 1+ Cells	1067
		Stain 1 2+ Cells	523		Stain 1 2+ Cells	831		Stain 1 2+ Cells	434		Stain 1 2+ Cells	615		Stain 1 2+ Cells	266		Stain 1 2+ Cells	292		Stain 1 2+ Cells	1026		Stain 1 2+ Cells	1020
		Stain 1 3+ Cells	236		Stain 1 3+ Cells	435		Stain 1 3+ Cells	289		Stain 1 3+ Cells	354		Stain 1 3+ Cells	216		Stain 1 3+ Cells	288		Stain 1 3+ Cells	1001		Stain 1 3+ Cells	673
		Stain 2 Positive Cells	0		Stain 2 Positive Cells	0		Stain 2 Positive Cells	0		Stain 2 Positive Cells	0		Stain 2 Positive Cells	0		Stain 2 Positive Cells	0		Stain 2 Positive Cells	0		Stain 2 Positive Cells	0
		Stain 2 0+ Cells	2448		Stain 2 0+ Cells	3864		Stain 2 0+ Cells	2414		Stain 2 0+ Cells	3466		Stain 2 0+ Cells	1965		Stain 2 0+ Cells	2130		Stain 2 0+ Cells	5998		Stain 2 0+ Cells	6229
		Stain 2 1+ Cells	0		Stain 2 1+ Cells	0		Stain 2 1+ Cells	0		Stain 2 1+ Cells	0		Stain 2 1+ Cells	0		Stain 2 1+ Cells	0		Stain 2 1+ Cells	0		Stain 2 1+ Cells	0
		Stain 2 2+ Cells	0		Stain 2 2+ Cells	0		Stain 2 2+ Cells	0		Stain 2 2+ Cells	0		Stain 2 2+ Cells	0		Stain 2 2+ Cells	0		Stain 2 2+ Cells	0		Stain 2 2+ Cells	0
		Stain 2 3+ Cells	0		Stain 2 3+ Cells	0		Stain 2 3+ Cells	0		Stain 2 3+ Cells	0		Stain 2 3+ Cells	0		Stain 2 3+ Cells	0		Stain 2 3+ Cells	0		Stain 2 3+ Cells	0
		Dual Positive Cells	0		Dual Positive Cells	0		Dual Positive Cells	0		Dual Positive Cells	0		Dual Positive Cells	0		Dual Positive Cells	0		Dual Positive Cells	0		Dual Positive Cells	0
		Dual Negative Cells	1110		Dual Negative Cells	1826		Dual Negative Cells	1203		Dual Negative Cells	1803		Dual Negative Cells	1182		Dual Negative Cells	1287		Dual Negative Cells	3123		Dual Negative Cells	3469
		% Stain 1 Positive Cells	54.6569		% Stain 1 Positive Cells	52.7433		% Stain 1 Positive Cells	50.1657		% Stain 1 Positive Cells	47.9804		% Stain 1 Positive Cells	39.8473		% Stain 1 Positive Cells	39.5775		% Stain 1 Positive Cells	47.9326		% Stain 1 Positive Cells	44.3089		47.1516
		% Stain 1 0+ Cells	45.3431		% Stain 1 0+ Cells	47.2567		% Stain 1 0+ Cells	49.8343		% Stain 1 0+ Cells	52.0196		% Stain 1 0+ Cells	60.1527		% Stain 1 0+ Cells	60.4225		% Stain 1 0+ Cells	52.0674		% Stain 1 0+ Cells	55.6911
		% Stain 1 1+ Cells	23.652		% Stain 1 1+ Cells	19.9793		% Stain 1 1+ Cells	20.2154		% Stain 1 1+ Cells	20.0231		% Stain 1 1+ Cells	15.3181		% Stain 1 1+ Cells	12.3474		% Stain 1 1+ Cells	14.138		% Stain 1 1+ Cells	17.1296
		% Stain 1 2+ Cells	21.3644		% Stain 1 2+ Cells	21.5062		% Stain 1 2+ Cells	17.9785		% Stain 1 2+ Cells	17.7438		% Stain 1 2+ Cells	13.5369		% Stain 1 2+ Cells	13.7089		% Stain 1 2+ Cells	17.1057		% Stain 1 2+ Cells	16.375
		% Stain 1 3+ Cells	9.64052		% Stain 1 3+ Cells	11.2578		% Stain 1 3+ Cells	11.9718		% Stain 1 3+ Cells	10.2135		% Stain 1 3+ Cells	10.9924		% Stain 1 3+ Cells	13.5211		% Stain 1 3+ Cells	16.6889		% Stain 1 3+ Cells	10.8043
		Stain 1 H-Score	95.3023		Stain 1 H-Score	96.765		Stain 1 H-Score	92.0878		Stain 1 H-Score	86.1512		Stain 1 H-Score	75.369		Stain 1 H-Score	80.3286		Stain 1 H-Score	98.4161		Stain 1 H-Score	82.2925
		% Stain 2 Positive Cells	0		% Stain 2 Positive Cells	0		% Stain 2 Positive Cells	0		% Stain 2 Positive Cells	0		% Stain 2 Positive Cells	0		% Stain 2 Positive Cells	0		% Stain 2 Positive Cells	0		% Stain 2 Positive Cells	0
		% Stain 2 0+ Cells	100		% Stain 2 0+ Cells	100		% Stain 2 0+ Cells	100		% Stain 2 0+ Cells	100		% Stain 2 0+ Cells	100		% Stain 2 0+ Cells	100		% Stain 2 0+ Cells	100		% Stain 2 0+ Cells	100
		% Stain 2 1+ Cells	0		% Stain 2 1+ Cells	0		% Stain 2 1+ Cells	0		% Stain 2 1+ Cells	0		% Stain 2 1+ Cells	0		% Stain 2 1+ Cells	0		% Stain 2 1+ Cells	0		% Stain 2 1+ Cells	0
		% Stain 2 2+ Cells	0		% Stain 2 2+ Cells	0		% Stain 2 2+ Cells	0		% Stain 2 2+ Cells	0		% Stain 2 2+ Cells	0		% Stain 2 2+ Cells	0		% Stain 2 2+ Cells	0		% Stain 2 2+ Cells	0
		% Stain 2 3+ Cells	0		% Stain 2 3+ Cells	0		% Stain 2 3+ Cells	0		% Stain 2 3+ Cells	0		% Stain 2 3+ Cells	0		% Stain 2 3+ Cells	0		% Stain 2 3+ Cells	0		% Stain 2 3+ Cells	0
		Stain 2 H-Score	0		Stain 2 H-Score	0		Stain 2 H-Score	0		Stain 2 H-Score	0		Stain 2 H-Score	0		Stain 2 H-Score	0		Stain 2 H-Score	0		Stain 2 H-Score	0
		% Dual Positive Cells	0		% Dual Positive Cells	0		% Dual Positive Cells	0		% Dual Positive Cells	0		% Dual Positive Cells	0		% Dual Positive Cells	0		% Dual Positive Cells	0		% Dual Positive Cells	0
		% Dual Negative Cells	45.3431		% Dual Negative Cells	47.2567		% Dual Negative Cells	49.8343		% Dual Negative Cells	52.0196		% Dual Negative Cells	60.1527		% Dual Negative Cells	60.4225		% Dual Negative Cells	52.0674		% Dual Negative Cells	55.6911
		Avg Stain 1 Nuclear OD	0.214698		Avg Stain 1 Nuclear OD	0.220485		Avg Stain 1 Nuclear OD	0.216538		Avg Stain 1 Nuclear OD	0.203242		Avg Stain 1 Nuclear OD	0.18344		Avg Stain 1 Nuclear OD	0.20192		Avg Stain 1 Nuclear OD	0.237441		Avg Stain 1 Nuclear OD	0.198914
		Avg Stain 2 Nuclear OD	0.04088		Avg Stain 2 Nuclear OD	0.041786		Avg Stain 2 Nuclear OD	0.0438302		Avg Stain 2 Nuclear OD	0.0428898		Avg Stain 2 Nuclear OD	0.0428495		Avg Stain 2 Nuclear OD	0.0487558		Avg Stain 2 Nuclear OD	0.0493554		Avg Stain 2 Nuclear OD	0.0440193
		Avg Stain 1 Cytoplasmic OD	0.0641533		Avg Stain 1 Cytoplasmic OD	0.0651151		Avg Stain 1 Cytoplasmic OD	0.0638789		Avg Stain 1 Cytoplasmic OD	0.0629048		Avg Stain 1 Cytoplasmic OD	0.0577388		Avg Stain 1 Cytoplasmic OD	0.0563898		Avg Stain 1 Cytoplasmic OD	0.0615567		Avg Stain 1 Cytoplasmic OD	0.0585378
		Avg Stain 2 Cytoplasmic OD	0.0318819		Avg Stain 2 Cytoplasmic OD	0.031912		Avg Stain 2 Cytoplasmic OD	0.031952		Avg Stain 2 Cytoplasmic OD	0.0321328		Avg Stain 2 Cytoplasmic OD	0.0318302		Avg Stain 2 Cytoplasmic OD	0.0319842		Avg Stain 2 Cytoplasmic OD	0.0320135		Avg Stain 2 Cytoplasmic OD	0.0319286
		Avg Cell Area (µm²)	110.242		Avg Cell Area (µm²)	109.158		Avg Cell Area (µm²)	101.088		Avg Cell Area (µm²)	105.596		Avg Cell Area (µm²)	104.847		Avg Cell Area (µm²)	96.1553		Avg Cell Area (µm²)	99.8221		Avg Cell Area (µm²)	106.84
		Avg Cytoplasm Area (µm²)	85.7032		Avg Cytoplasm Area (µm²)	84.9633		Avg Cytoplasm Area (µm²)	77.4486		Avg Cytoplasm Area (µm²)	80.8209		Avg Cytoplasm Area (µm²)	80.142		Avg Cytoplasm Area (µm²)	75.5939		Avg Cytoplasm Area (µm²)	77.5594		Avg Cytoplasm Area (µm²)	83.5602
		Avg Nucleus Area (µm²)	24.5387		Avg Nucleus Area (µm²)	24.1943		Avg Nucleus Area (µm²)	23.6397		Avg Nucleus Area (µm²)	24.7753		Avg Nucleus Area (µm²)	24.7054		Avg Nucleus Area (µm²)	20.5614		Avg Nucleus Area (µm²)	22.2627		Avg Nucleus Area (µm²)	23.2802
		Avg Nucleus Perimeter (µm)	9.68809		Avg Nucleus Perimeter (µm)	9.49373		Avg Nucleus Perimeter (µm)	9.30675		Avg Nucleus Perimeter (µm)	9.66744		Avg Nucleus Perimeter (µm)	9.71571		Avg Nucleus Perimeter (µm)	8.14836		Avg Nucleus Perimeter (µm)	8.81801		Avg Nucleus Perimeter (µm)	9.16366
		Avg Nucleus Roundness	0.704371		Avg Nucleus Roundness	0.707163		Avg Nucleus Roundness	0.697201		Avg Nucleus Roundness	0.706125		Avg Nucleus Roundness	0.699955		Avg Nucleus Roundness	0.698024		Avg Nucleus Roundness	0.697874		Avg Nucleus Roundness	0.705333
		Tissue Area (µm²)	680569		Tissue Area (µm²)	1087890		Tissue Area (µm²)	569479		Tissue Area (µm²)	888840		Tissue Area (µm²)	498624		Tissue Area (µm²)	491666		Tissue Area (µm²)	1441130		Tissue Area (µm²)	1676600
		tumour: Total Cells	2448		tumour: Total Cells	3864		tumour: Total Cells	2414		tumour: Total Cells	3466		tumour: Total Cells	1965		tumour: Total Cells	2130		tumour: Total Cells	5998		tumour: Total Cells	6229
		tumour: Stain 1 Positive Cells	1338		tumour: Stain 1 Positive Cells	2038		tumour: Stain 1 Positive Cells	1211		tumour: Stain 1 Positive Cells	1663		tumour: Stain 1 Positive Cells	783		tumour: Stain 1 Positive Cells	843		tumour: Stain 1 Positive Cells	2875		tumour: Stain 1 Positive Cells	2760
		tumour: Stain 1 0+ Cells	1110		tumour: Stain 1 0+ Cells	1826		tumour: Stain 1 0+ Cells	1203		tumour: Stain 1 0+ Cells	1803		tumour: Stain 1 0+ Cells	1182		tumour: Stain 1 0+ Cells	1287		tumour: Stain 1 0+ Cells	3123		tumour: Stain 1 0+ Cells	3469
		tumour: Stain 1 1+ Cells	579		tumour: Stain 1 1+ Cells	772		tumour: Stain 1 1+ Cells	488		tumour: Stain 1 1+ Cells	694		tumour: Stain 1 1+ Cells	301		tumour: Stain 1 1+ Cells	263		tumour: Stain 1 1+ Cells	848		tumour: Stain 1 1+ Cells	1067
		tumour: Stain 1 2+ Cells	523		tumour: Stain 1 2+ Cells	831		tumour: Stain 1 2+ Cells	434		tumour: Stain 1 2+ Cells	615		tumour: Stain 1 2+ Cells	266		tumour: Stain 1 2+ Cells	292		tumour: Stain 1 2+ Cells	1026		tumour: Stain 1 2+ Cells	1020
		tumour: Stain 1 3+ Cells	236		tumour: Stain 1 3+ Cells	435		tumour: Stain 1 3+ Cells	289		tumour: Stain 1 3+ Cells	354		tumour: Stain 1 3+ Cells	216		tumour: Stain 1 3+ Cells	288		tumour: Stain 1 3+ Cells	1001		tumour: Stain 1 3+ Cells	673
		tumour: Stain 2 Positive Cells	0		tumour: Stain 2 Positive Cells	0		tumour: Stain 2 Positive Cells	0		tumour: Stain 2 Positive Cells	0		tumour: Stain 2 Positive Cells	0		tumour: Stain 2 Positive Cells	0		tumour: Stain 2 Positive Cells	0		tumour: Stain 2 Positive Cells	0
		tumour: Stain 2 0+ Cells	2448		tumour: Stain 2 0+ Cells	3864		tumour: Stain 2 0+ Cells	2414		tumour: Stain 2 0+ Cells	3466		tumour: Stain 2 0+ Cells	1965		tumour: Stain 2 0+ Cells	2130		tumour: Stain 2 0+ Cells	5998		tumour: Stain 2 0+ Cells	6229
		tumour: Stain 2 1+ Cells	0		tumour: Stain 2 1+ Cells	0		tumour: Stain 2 1+ Cells	0		tumour: Stain 2 1+ Cells	0		tumour: Stain 2 1+ Cells	0		tumour: Stain 2 1+ Cells	0		tumour: Stain 2 1+ Cells	0		tumour: Stain 2 1+ Cells	0
		tumour: Stain 2 2+ Cells	0		tumour: Stain 2 2+ Cells	0		tumour: Stain 2 2+ Cells	0		tumour: Stain 2 2+ Cells	0		tumour: Stain 2 2+ Cells	0		tumour: Stain 2 2+ Cells	0		tumour: Stain 2 2+ Cells	0		tumour: Stain 2 2+ Cells	0
		tumour: Stain 2 3+ Cells	0		tumour: Stain 2 3+ Cells	0		tumour: Stain 2 3+ Cells	0		tumour: Stain 2 3+ Cells	0		tumour: Stain 2 3+ Cells	0		tumour: Stain 2 3+ Cells	0		tumour: Stain 2 3+ Cells	0		tumour: Stain 2 3+ Cells	0
		tumour: Dual Positive Cells	0		tumour: Dual Positive Cells	0		tumour: Dual Positive Cells	0		tumour: Dual Positive Cells	0		tumour: Dual Positive Cells	0		tumour: Dual Positive Cells	0		tumour: Dual Positive Cells	0		tumour: Dual Positive Cells	0
		tumour: Dual Negative Cells	1110		tumour: Dual Negative Cells	1826		tumour: Dual Negative Cells	1203		tumour: Dual Negative Cells	1803		tumour: Dual Negative Cells	1182		tumour: Dual Negative Cells	1287		tumour: Dual Negative Cells	3123		tumour: Dual Negative Cells	3469
		tumour: % Stain 1 Positive Cells	54.6569		tumour: % Stain 1 Positive Cells	52.7433		tumour: % Stain 1 Positive Cells	50.1657		tumour: % Stain 1 Positive Cells	47.9804		tumour: % Stain 1 Positive Cells	39.8473		tumour: % Stain 1 Positive Cells	39.5775		tumour: % Stain 1 Positive Cells	47.9326		tumour: % Stain 1 Positive Cells	44.3089
		tumour: % Stain 1 0+ Cells	45.3431		tumour: % Stain 1 0+ Cells	47.2567		tumour: % Stain 1 0+ Cells	49.8343		tumour: % Stain 1 0+ Cells	52.0196		tumour: % Stain 1 0+ Cells	60.1527		tumour: % Stain 1 0+ Cells	60.4225		tumour: % Stain 1 0+ Cells	52.0674		tumour: % Stain 1 0+ Cells	55.6911
		tumour: % Stain 1 1+ Cells	23.652		tumour: % Stain 1 1+ Cells	19.9793		tumour: % Stain 1 1+ Cells	20.2154		tumour: % Stain 1 1+ Cells	20.0231		tumour: % Stain 1 1+ Cells	15.3181		tumour: % Stain 1 1+ Cells	12.3474		tumour: % Stain 1 1+ Cells	14.138		tumour: % Stain 1 1+ Cells	17.1296
		tumour: % Stain 1 2+ Cells	21.3644		tumour: % Stain 1 2+ Cells	21.5062		tumour: % Stain 1 2+ Cells	17.9785		tumour: % Stain 1 2+ Cells	17.7438		tumour: % Stain 1 2+ Cells	13.5369		tumour: % Stain 1 2+ Cells	13.7089		tumour: % Stain 1 2+ Cells	17.1057		tumour: % Stain 1 2+ Cells	16.375
		tumour: % Stain 1 3+ Cells	9.64052		tumour: % Stain 1 3+ Cells	11.2578		tumour: % Stain 1 3+ Cells	11.9718		tumour: % Stain 1 3+ Cells	10.2135		tumour: % Stain 1 3+ Cells	10.9924		tumour: % Stain 1 3+ Cells	13.5211		tumour: % Stain 1 3+ Cells	16.6889		tumour: % Stain 1 3+ Cells	10.8043
		tumour: Stain 1 H-Score	95.3023		tumour: Stain 1 H-Score	96.765		tumour: Stain 1 H-Score	92.0878		tumour: Stain 1 H-Score	86.1512		tumour: Stain 1 H-Score	75.369		tumour: Stain 1 H-Score	80.3286		tumour: Stain 1 H-Score	98.4161		tumour: Stain 1 H-Score	82.2925
		tumour: % Stain 2 Positive Cells	0		tumour: % Stain 2 Positive Cells	0		tumour: % Stain 2 Positive Cells	0		tumour: % Stain 2 Positive Cells	0		tumour: % Stain 2 Positive Cells	0		tumour: % Stain 2 Positive Cells	0		tumour: % Stain 2 Positive Cells	0		tumour: % Stain 2 Positive Cells	0
		tumour: % Stain 2 0+ Cells	100		tumour: % Stain 2 0+ Cells	100		tumour: % Stain 2 0+ Cells	100		tumour: % Stain 2 0+ Cells	100		tumour: % Stain 2 0+ Cells	100		tumour: % Stain 2 0+ Cells	100		tumour: % Stain 2 0+ Cells	100		tumour: % Stain 2 0+ Cells	100
		tumour: % Stain 2 1+ Cells	0		tumour: % Stain 2 1+ Cells	0		tumour: % Stain 2 1+ Cells	0		tumour: % Stain 2 1+ Cells	0		tumour: % Stain 2 1+ Cells	0		tumour: % Stain 2 1+ Cells	0		tumour: % Stain 2 1+ Cells	0		tumour: % Stain 2 1+ Cells	0
		tumour: % Stain 2 2+ Cells	0		tumour: % Stain 2 2+ Cells	0		tumour: % Stain 2 2+ Cells	0		tumour: % Stain 2 2+ Cells	0		tumour: % Stain 2 2+ Cells	0		tumour: % Stain 2 2+ Cells	0		tumour: % Stain 2 2+ Cells	0		tumour: % Stain 2 2+ Cells	0
		tumour: % Stain 2 3+ Cells	0		tumour: % Stain 2 3+ Cells	0		tumour: % Stain 2 3+ Cells	0		tumour: % Stain 2 3+ Cells	0		tumour: % Stain 2 3+ Cells	0		tumour: % Stain 2 3+ Cells	0		tumour: % Stain 2 3+ Cells	0		tumour: % Stain 2 3+ Cells	0
		tumour: Stain 2 H-Score	0		tumour: Stain 2 H-Score	0		tumour: Stain 2 H-Score	0		tumour: Stain 2 H-Score	0		tumour: Stain 2 H-Score	0		tumour: Stain 2 H-Score	0		tumour: Stain 2 H-Score	0		tumour: Stain 2 H-Score	0
		tumour: % Dual Positive Cells	0		tumour: % Dual Positive Cells	0		tumour: % Dual Positive Cells	0		tumour: % Dual Positive Cells	0		tumour: % Dual Positive Cells	0		tumour: % Dual Positive Cells	0		tumour: % Dual Positive Cells	0		tumour: % Dual Positive Cells	0
		tumour: % Dual Negative Cells	45.3431		tumour: % Dual Negative Cells	47.2567		tumour: % Dual Negative Cells	49.8343		tumour: % Dual Negative Cells	52.0196		tumour: % Dual Negative Cells	60.1527		tumour: % Dual Negative Cells	60.4225		tumour: % Dual Negative Cells	52.0674		tumour: % Dual Negative Cells	55.6911
		tumour: Avg Stain 1 Nuclear OD	0.214698		tumour: Avg Stain 1 Nuclear OD	0.220485		tumour: Avg Stain 1 Nuclear OD	0.216538		tumour: Avg Stain 1 Nuclear OD	0.203242		tumour: Avg Stain 1 Nuclear OD	0.18344		tumour: Avg Stain 1 Nuclear OD	0.20192		tumour: Avg Stain 1 Nuclear OD	0.237441		tumour: Avg Stain 1 Nuclear OD	0.198914
		tumour: Avg Stain 2 Nuclear OD	0.04088		tumour: Avg Stain 2 Nuclear OD	0.041786		tumour: Avg Stain 2 Nuclear OD	0.0438302		tumour: Avg Stain 2 Nuclear OD	0.0428898		tumour: Avg Stain 2 Nuclear OD	0.0428495		tumour: Avg Stain 2 Nuclear OD	0.0487558		tumour: Avg Stain 2 Nuclear OD	0.0493554		tumour: Avg Stain 2 Nuclear OD	0.0440193
		tumour: Avg Stain 1 Cytoplasmic OD	0.0641533		tumour: Avg Stain 1 Cytoplasmic OD	0.0651151		tumour: Avg Stain 1 Cytoplasmic OD	0.0638789		tumour: Avg Stain 1 Cytoplasmic OD	0.0629048		tumour: Avg Stain 1 Cytoplasmic OD	0.0577388		tumour: Avg Stain 1 Cytoplasmic OD	0.0563898		tumour: Avg Stain 1 Cytoplasmic OD	0.0615567		tumour: Avg Stain 1 Cytoplasmic OD	0.0585378
		tumour: Avg Stain 2 Cytoplasmic OD	0.0318819		tumour: Avg Stain 2 Cytoplasmic OD	0.031912		tumour: Avg Stain 2 Cytoplasmic OD	0.031952		tumour: Avg Stain 2 Cytoplasmic OD	0.0321328		tumour: Avg Stain 2 Cytoplasmic OD	0.0318302		tumour: Avg Stain 2 Cytoplasmic OD	0.0319842		tumour: Avg Stain 2 Cytoplasmic OD	0.0320135		tumour: Avg Stain 2 Cytoplasmic OD	0.0319286
		tumour: Avg Cell Area (µm²)	110.242		tumour: Avg Cell Area (µm²)	109.158		tumour: Avg Cell Area (µm²)	101.088		tumour: Avg Cell Area (µm²)	105.596		tumour: Avg Cell Area (µm²)	104.847		tumour: Avg Cell Area (µm²)	96.1553		tumour: Avg Cell Area (µm²)	99.8221		tumour: Avg Cell Area (µm²)	106.84
		tumour: Avg Cytoplasm Area (µm²)	85.7032		tumour: Avg Cytoplasm Area (µm²)	84.9633		tumour: Avg Cytoplasm Area (µm²)	77.4486		tumour: Avg Cytoplasm Area (µm²)	80.8209		tumour: Avg Cytoplasm Area (µm²)	80.142		tumour: Avg Cytoplasm Area (µm²)	75.5939		tumour: Avg Cytoplasm Area (µm²)	77.5594		tumour: Avg Cytoplasm Area (µm²)	83.5602
		tumour: Avg Nucleus Area (µm²)	24.5387		tumour: Avg Nucleus Area (µm²)	24.1943		tumour: Avg Nucleus Area (µm²)	23.6397		tumour: Avg Nucleus Area (µm²)	24.7753		tumour: Avg Nucleus Area (µm²)	24.7054		tumour: Avg Nucleus Area (µm²)	20.5614		tumour: Avg Nucleus Area (µm²)	22.2627		tumour: Avg Nucleus Area (µm²)	23.2802
		tumour: Avg Nucleus Perimeter (µm)	9.68809		tumour: Avg Nucleus Perimeter (µm)	9.49373		tumour: Avg Nucleus Perimeter (µm)	9.30675		tumour: Avg Nucleus Perimeter (µm)	9.66744		tumour: Avg Nucleus Perimeter (µm)	9.71571		tumour: Avg Nucleus Perimeter (µm)	8.14836		tumour: Avg Nucleus Perimeter (µm)	8.81801		tumour: Avg Nucleus Perimeter (µm)	9.16366
		tumour: Avg Nucleus Roundness	0.704371		tumour: Avg Nucleus Roundness	0.707163		tumour: Avg Nucleus Roundness	0.697201		tumour: Avg Nucleus Roundness	0.706125		tumour: Avg Nucleus Roundness	0.699955		tumour: Avg Nucleus Roundness	0.698024		tumour: Avg Nucleus Roundness	0.697874		tumour: Avg Nucleus Roundness	0.705333
		tumour: Tissue Area (µm²)	680569		tumour: Tissue Area (µm²)	1087890		tumour: Tissue Area (µm²)	569479		tumour: Tissue Area (µm²)	888840		tumour: Tissue Area (µm²)	498624		tumour: Tissue Area (µm²)	491666		tumour: Tissue Area (µm²)	1441130		tumour: Tissue Area (µm²)	1676600
		BSNA11.1f	HOM
		Name	Value		Name	Value		Name	Value		Name	Value		Name	Value		Name	Value		Name	Value		Name	Value
		Classified Area (mm²)	1.25584		Classified Area (mm²)	1.41744		Classified Area (mm²)	1.13946		Classified Area (mm²)	1.29291		Classified Area (mm²)	1.48079		Classified Area (mm²)	1.08603		Classified Area (mm²)	1.9774		Classified Area (mm²)	1.17854
		tumour Area (mm²)	1.19646		tumour Area (mm²)	1.35331		tumour Area (mm²)	1.12427		tumour Area (mm²)	1.17554		tumour Area (mm²)	1.41391		tumour Area (mm²)	1.0228		tumour Area (mm²)	1.9745		tumour Area (mm²)	1.12176
		empty Area (mm²)	0.00088		empty Area (mm²)	0.00157		empty Area (mm²)	0.00966		empty Area (mm²)	6e-05		empty Area (mm²)	0.00028		empty Area (mm²)	0.00103		empty Area (mm²)	0.00034		empty Area (mm²)	0.00132
		necrosis Area (mm²)	0.00644		necrosis Area (mm²)	0.00648		necrosis Area (mm²)	0		necrosis Area (mm²)	0.00117		necrosis Area (mm²)	0.00012		necrosis Area (mm²)	0		necrosis Area (mm²)	0		necrosis Area (mm²)	6e-05
		normal Area (mm²)	0.05207		normal Area (mm²)	0.05608		normal Area (mm²)	0.00553		normal Area (mm²)	0.11614		normal Area (mm²)	0.06648		normal Area (mm²)	0.06221		normal Area (mm²)	0.00256		normal Area (mm²)	0.0554
		Total Cells	4705		Total Cells	5423		Total Cells	4798		Total Cells	4609		Total Cells	6394		Total Cells	4472		Total Cells	9072		Total Cells	4536
		Stain 1 Positive Cells	1694		Stain 1 Positive Cells	1612		Stain 1 Positive Cells	1824		Stain 1 Positive Cells	1140		Stain 1 Positive Cells	2385		Stain 1 Positive Cells	1507		Stain 1 Positive Cells	5738		Stain 1 Positive Cells	1393
		Stain 1 0+ Cells	3011		Stain 1 0+ Cells	3811		Stain 1 0+ Cells	2974		Stain 1 0+ Cells	3469		Stain 1 0+ Cells	4009		Stain 1 0+ Cells	2965		Stain 1 0+ Cells	3334		Stain 1 0+ Cells	3143
		Stain 1 1+ Cells	454		Stain 1 1+ Cells	537		Stain 1 1+ Cells	606		Stain 1 1+ Cells	465		Stain 1 1+ Cells	821		Stain 1 1+ Cells	486		Stain 1 1+ Cells	1387		Stain 1 1+ Cells	566
		Stain 1 2+ Cells	585		Stain 1 2+ Cells	651		Stain 1 2+ Cells	697		Stain 1 2+ Cells	421		Stain 1 2+ Cells	919		Stain 1 2+ Cells	549		Stain 1 2+ Cells	2411		Stain 1 2+ Cells	576
		Stain 1 3+ Cells	655		Stain 1 3+ Cells	424		Stain 1 3+ Cells	521		Stain 1 3+ Cells	254		Stain 1 3+ Cells	645		Stain 1 3+ Cells	472		Stain 1 3+ Cells	1940		Stain 1 3+ Cells	251
		Stain 2 Positive Cells	0		Stain 2 Positive Cells	0		Stain 2 Positive Cells	0		Stain 2 Positive Cells	0		Stain 2 Positive Cells	0		Stain 2 Positive Cells	0		Stain 2 Positive Cells	0		Stain 2 Positive Cells	0
		Stain 2 0+ Cells	4705		Stain 2 0+ Cells	5423		Stain 2 0+ Cells	4798		Stain 2 0+ Cells	4609		Stain 2 0+ Cells	6394		Stain 2 0+ Cells	4472		Stain 2 0+ Cells	9072		Stain 2 0+ Cells	4536
		Stain 2 1+ Cells	0		Stain 2 1+ Cells	0		Stain 2 1+ Cells	0		Stain 2 1+ Cells	0		Stain 2 1+ Cells	0		Stain 2 1+ Cells	0		Stain 2 1+ Cells	0		Stain 2 1+ Cells	0
		Stain 2 2+ Cells	0		Stain 2 2+ Cells	0		Stain 2 2+ Cells	0		Stain 2 2+ Cells	0		Stain 2 2+ Cells	0		Stain 2 2+ Cells	0		Stain 2 2+ Cells	0		Stain 2 2+ Cells	0
		Stain 2 3+ Cells	0		Stain 2 3+ Cells	0		Stain 2 3+ Cells	0		Stain 2 3+ Cells	0		Stain 2 3+ Cells	0		Stain 2 3+ Cells	0		Stain 2 3+ Cells	0		Stain 2 3+ Cells	0
		Dual Positive Cells	0		Dual Positive Cells	0		Dual Positive Cells	0		Dual Positive Cells	0		Dual Positive Cells	0		Dual Positive Cells	0		Dual Positive Cells	0		Dual Positive Cells	0
		Dual Negative Cells	3011		Dual Negative Cells	3811		Dual Negative Cells	2974		Dual Negative Cells	3469		Dual Negative Cells	4009		Dual Negative Cells	2965		Dual Negative Cells	3334		Dual Negative Cells	3143
		% Stain 1 Positive Cells	36.0043		% Stain 1 Positive Cells	29.7252		% Stain 1 Positive Cells	38.0158		% Stain 1 Positive Cells	24.7342		% Stain 1 Positive Cells	37.3006		% Stain 1 Positive Cells	33.6986		% Stain 1 Positive Cells	63.2496		% Stain 1 Positive Cells	30.7099		36.6798
		% Stain 1 0+ Cells	63.9957		% Stain 1 0+ Cells	70.2748		% Stain 1 0+ Cells	61.9842		% Stain 1 0+ Cells	75.2658		% Stain 1 0+ Cells	62.6994		% Stain 1 0+ Cells	66.3014		% Stain 1 0+ Cells	36.7504		% Stain 1 0+ Cells	69.2901
		% Stain 1 1+ Cells	9.64931		% Stain 1 1+ Cells	9.90227		% Stain 1 1+ Cells	12.6303		% Stain 1 1+ Cells	10.089		% Stain 1 1+ Cells	12.8402		% Stain 1 1+ Cells	10.8676		% Stain 1 1+ Cells	15.2888		% Stain 1 1+ Cells	12.478
		% Stain 1 2+ Cells	12.4336		% Stain 1 2+ Cells	12.0044		% Stain 1 2+ Cells	14.5269		% Stain 1 2+ Cells	9.1343		% Stain 1 2+ Cells	14.3728		% Stain 1 2+ Cells	12.2764		% Stain 1 2+ Cells	26.5763		% Stain 1 2+ Cells	12.6984
		% Stain 1 3+ Cells	13.9214		% Stain 1 3+ Cells	7.81855		% Stain 1 3+ Cells	10.8587		% Stain 1 3+ Cells	5.51096		% Stain 1 3+ Cells	10.0876		% Stain 1 3+ Cells	10.5546		% Stain 1 3+ Cells	21.3845		% Stain 1 3+ Cells	5.53351
		Stain 1 H-Score	76.2806		Stain 1 H-Score	57.3668		Stain 1 H-Score	74.2601		Stain 1 H-Score	44.8904		Stain 1 H-Score	71.8486		Stain 1 H-Score	67.0841		Stain 1 H-Score	132.595		Stain 1 H-Score	54.4753
		% Stain 2 Positive Cells	0		% Stain 2 Positive Cells	0		% Stain 2 Positive Cells	0		% Stain 2 Positive Cells	0		% Stain 2 Positive Cells	0		% Stain 2 Positive Cells	0		% Stain 2 Positive Cells	0		% Stain 2 Positive Cells	0
		% Stain 2 0+ Cells	100		% Stain 2 0+ Cells	100		% Stain 2 0+ Cells	100		% Stain 2 0+ Cells	100		% Stain 2 0+ Cells	100		% Stain 2 0+ Cells	100		% Stain 2 0+ Cells	100		% Stain 2 0+ Cells	100
		% Stain 2 1+ Cells	0		% Stain 2 1+ Cells	0		% Stain 2 1+ Cells	0		% Stain 2 1+ Cells	0		% Stain 2 1+ Cells	0		% Stain 2 1+ Cells	0		% Stain 2 1+ Cells	0		% Stain 2 1+ Cells	0
		% Stain 2 2+ Cells	0		% Stain 2 2+ Cells	0		% Stain 2 2+ Cells	0		% Stain 2 2+ Cells	0		% Stain 2 2+ Cells	0		% Stain 2 2+ Cells	0		% Stain 2 2+ Cells	0		% Stain 2 2+ Cells	0
		% Stain 2 3+ Cells	0		% Stain 2 3+ Cells	0		% Stain 2 3+ Cells	0		% Stain 2 3+ Cells	0		% Stain 2 3+ Cells	0		% Stain 2 3+ Cells	0		% Stain 2 3+ Cells	0		% Stain 2 3+ Cells	0
		Stain 2 H-Score	0		Stain 2 H-Score	0		Stain 2 H-Score	0		Stain 2 H-Score	0		Stain 2 H-Score	0		Stain 2 H-Score	0		Stain 2 H-Score	0		Stain 2 H-Score	0
		% Dual Positive Cells	0		% Dual Positive Cells	0		% Dual Positive Cells	0		% Dual Positive Cells	0		% Dual Positive Cells	0		% Dual Positive Cells	0		% Dual Positive Cells	0		% Dual Positive Cells	0
		% Dual Negative Cells	63.9957		% Dual Negative Cells	70.2748		% Dual Negative Cells	61.9842		% Dual Negative Cells	75.2658		% Dual Negative Cells	62.6994		% Dual Negative Cells	66.3014		% Dual Negative Cells	36.7504		% Dual Negative Cells	69.2901
		Avg Stain 1 Nuclear OD	0.191958		Avg Stain 1 Nuclear OD	0.147247		Avg Stain 1 Nuclear OD	0.182401		Avg Stain 1 Nuclear OD	0.118159		Avg Stain 1 Nuclear OD	0.175148		Avg Stain 1 Nuclear OD	0.170574		Avg Stain 1 Nuclear OD	0.303934		Avg Stain 1 Nuclear OD	0.137229
		Avg Stain 2 Nuclear OD	0.0459652		Avg Stain 2 Nuclear OD	0.0430277		Avg Stain 2 Nuclear OD	0.0435973		Avg Stain 2 Nuclear OD	0.040157		Avg Stain 2 Nuclear OD	0.0421539		Avg Stain 2 Nuclear OD	0.0440937		Avg Stain 2 Nuclear OD	0.0515972		Avg Stain 2 Nuclear OD	0.0393092
		Avg Stain 1 Cytoplasmic OD	0.0590246		Avg Stain 1 Cytoplasmic OD	0.0508762		Avg Stain 1 Cytoplasmic OD	0.0574521		Avg Stain 1 Cytoplasmic OD	0.0468312		Avg Stain 1 Cytoplasmic OD	0.0570223		Avg Stain 1 Cytoplasmic OD	0.054534		Avg Stain 1 Cytoplasmic OD	0.0823376		Avg Stain 1 Cytoplasmic OD	0.0503715
		Avg Stain 2 Cytoplasmic OD	0.0321712		Avg Stain 2 Cytoplasmic OD	0.0322264		Avg Stain 2 Cytoplasmic OD	0.0320095		Avg Stain 2 Cytoplasmic OD	0.0321521		Avg Stain 2 Cytoplasmic OD	0.0319817		Avg Stain 2 Cytoplasmic OD	0.0321935		Avg Stain 2 Cytoplasmic OD	0.0322461		Avg Stain 2 Cytoplasmic OD	0.0319763
		Avg Cell Area (µm²)	100.702		Avg Cell Area (µm²)	95.7485		Avg Cell Area (µm²)	98.7239		Avg Cell Area (µm²)	97.6574		Avg Cell Area (µm²)	97.4702		Avg Cell Area (µm²)	100.109		Avg Cell Area (µm²)	101.533		Avg Cell Area (µm²)	100.635
		Avg Cytoplasm Area (µm²)	75.1714		Avg Cytoplasm Area (µm²)	70.2796		Avg Cytoplasm Area (µm²)	75.7999		Avg Cytoplasm Area (µm²)	73.9334		Avg Cytoplasm Area (µm²)	74.0607		Avg Cytoplasm Area (µm²)	76.1318		Avg Cytoplasm Area (µm²)	74.2252		Avg Cytoplasm Area (µm²)	78.983
		Avg Nucleus Area (µm²)	25.5308		Avg Nucleus Area (µm²)	25.4689		Avg Nucleus Area (µm²)	22.924		Avg Nucleus Area (µm²)	23.7241		Avg Nucleus Area (µm²)	23.4095		Avg Nucleus Area (µm²)	23.977		Avg Nucleus Area (µm²)	27.3082		Avg Nucleus Area (µm²)	21.6516
		Avg Nucleus Perimeter (µm)	10.0536		Avg Nucleus Perimeter (µm)	10.0382		Avg Nucleus Perimeter (µm)	9.06983		Avg Nucleus Perimeter (µm)	9.3921		Avg Nucleus Perimeter (µm)	9.26821		Avg Nucleus Perimeter (µm)	9.45824		Avg Nucleus Perimeter (µm)	10.7326		Avg Nucleus Perimeter (µm)	8.58127
		Avg Nucleus Roundness	0.688718		Avg Nucleus Roundness	0.683676		Avg Nucleus Roundness	0.694751		Avg Nucleus Roundness	0.68696		Avg Nucleus Roundness	0.690816		Avg Nucleus Roundness	0.692648		Avg Nucleus Roundness	0.691078		Avg Nucleus Roundness	0.69381
		Tissue Area (µm²)	1045430		Tissue Area (µm²)	1090540		Tissue Area (µm²)	1079820		Tissue Area (µm²)	995793		Tissue Area (µm²)	1384190		Tissue Area (µm²)	1008110		Tissue Area (µm²)	1966990		Tissue Area (µm²)	1097120
		tumour: Total Cells	4705		tumour: Total Cells	5423		tumour: Total Cells	4798		tumour: Total Cells	4609		tumour: Total Cells	6394		tumour: Total Cells	4472		tumour: Total Cells	9072		tumour: Total Cells	4536
		tumour: Stain 1 Positive Cells	1694		tumour: Stain 1 Positive Cells	1612		tumour: Stain 1 Positive Cells	1824		tumour: Stain 1 Positive Cells	1140		tumour: Stain 1 Positive Cells	2385		tumour: Stain 1 Positive Cells	1507		tumour: Stain 1 Positive Cells	5738		tumour: Stain 1 Positive Cells	1393
		tumour: Stain 1 0+ Cells	3011		tumour: Stain 1 0+ Cells	3811		tumour: Stain 1 0+ Cells	2974		tumour: Stain 1 0+ Cells	3469		tumour: Stain 1 0+ Cells	4009		tumour: Stain 1 0+ Cells	2965		tumour: Stain 1 0+ Cells	3334		tumour: Stain 1 0+ Cells	3143
		tumour: Stain 1 1+ Cells	454		tumour: Stain 1 1+ Cells	537		tumour: Stain 1 1+ Cells	606		tumour: Stain 1 1+ Cells	465		tumour: Stain 1 1+ Cells	821		tumour: Stain 1 1+ Cells	486		tumour: Stain 1 1+ Cells	1387		tumour: Stain 1 1+ Cells	566
		tumour: Stain 1 2+ Cells	585		tumour: Stain 1 2+ Cells	651		tumour: Stain 1 2+ Cells	697		tumour: Stain 1 2+ Cells	421		tumour: Stain 1 2+ Cells	919		tumour: Stain 1 2+ Cells	549		tumour: Stain 1 2+ Cells	2411		tumour: Stain 1 2+ Cells	576
		tumour: Stain 1 3+ Cells	655		tumour: Stain 1 3+ Cells	424		tumour: Stain 1 3+ Cells	521		tumour: Stain 1 3+ Cells	254		tumour: Stain 1 3+ Cells	645		tumour: Stain 1 3+ Cells	472		tumour: Stain 1 3+ Cells	1940		tumour: Stain 1 3+ Cells	251
		tumour: Stain 2 Positive Cells	0		tumour: Stain 2 Positive Cells	0		tumour: Stain 2 Positive Cells	0		tumour: Stain 2 Positive Cells	0		tumour: Stain 2 Positive Cells	0		tumour: Stain 2 Positive Cells	0		tumour: Stain 2 Positive Cells	0		tumour: Stain 2 Positive Cells	0
		tumour: Stain 2 0+ Cells	4705		tumour: Stain 2 0+ Cells	5423		tumour: Stain 2 0+ Cells	4798		tumour: Stain 2 0+ Cells	4609		tumour: Stain 2 0+ Cells	6394		tumour: Stain 2 0+ Cells	4472		tumour: Stain 2 0+ Cells	9072		tumour: Stain 2 0+ Cells	4536
		tumour: Stain 2 1+ Cells	0		tumour: Stain 2 1+ Cells	0		tumour: Stain 2 1+ Cells	0		tumour: Stain 2 1+ Cells	0		tumour: Stain 2 1+ Cells	0		tumour: Stain 2 1+ Cells	0		tumour: Stain 2 1+ Cells	0		tumour: Stain 2 1+ Cells	0
		tumour: Stain 2 2+ Cells	0		tumour: Stain 2 2+ Cells	0		tumour: Stain 2 2+ Cells	0		tumour: Stain 2 2+ Cells	0		tumour: Stain 2 2+ Cells	0		tumour: Stain 2 2+ Cells	0		tumour: Stain 2 2+ Cells	0		tumour: Stain 2 2+ Cells	0
		tumour: Stain 2 3+ Cells	0		tumour: Stain 2 3+ Cells	0		tumour: Stain 2 3+ Cells	0		tumour: Stain 2 3+ Cells	0		tumour: Stain 2 3+ Cells	0		tumour: Stain 2 3+ Cells	0		tumour: Stain 2 3+ Cells	0		tumour: Stain 2 3+ Cells	0
		tumour: Dual Positive Cells	0		tumour: Dual Positive Cells	0		tumour: Dual Positive Cells	0		tumour: Dual Positive Cells	0		tumour: Dual Positive Cells	0		tumour: Dual Positive Cells	0		tumour: Dual Positive Cells	0		tumour: Dual Positive Cells	0
		tumour: Dual Negative Cells	3011		tumour: Dual Negative Cells	3811		tumour: Dual Negative Cells	2974		tumour: Dual Negative Cells	3469		tumour: Dual Negative Cells	4009		tumour: Dual Negative Cells	2965		tumour: Dual Negative Cells	3334		tumour: Dual Negative Cells	3143
		tumour: % Stain 1 Positive Cells	36.0043		tumour: % Stain 1 Positive Cells	29.7252		tumour: % Stain 1 Positive Cells	38.0158		tumour: % Stain 1 Positive Cells	24.7342		tumour: % Stain 1 Positive Cells	37.3006		tumour: % Stain 1 Positive Cells	33.6986		tumour: % Stain 1 Positive Cells	63.2496		tumour: % Stain 1 Positive Cells	30.7099
		tumour: % Stain 1 0+ Cells	63.9957		tumour: % Stain 1 0+ Cells	70.2748		tumour: % Stain 1 0+ Cells	61.9842		tumour: % Stain 1 0+ Cells	75.2658		tumour: % Stain 1 0+ Cells	62.6994		tumour: % Stain 1 0+ Cells	66.3014		tumour: % Stain 1 0+ Cells	36.7504		tumour: % Stain 1 0+ Cells	69.2901
		tumour: % Stain 1 1+ Cells	9.64931		tumour: % Stain 1 1+ Cells	9.90227		tumour: % Stain 1 1+ Cells	12.6303		tumour: % Stain 1 1+ Cells	10.089		tumour: % Stain 1 1+ Cells	12.8402		tumour: % Stain 1 1+ Cells	10.8676		tumour: % Stain 1 1+ Cells	15.2888		tumour: % Stain 1 1+ Cells	12.478
		tumour: % Stain 1 2+ Cells	12.4336		tumour: % Stain 1 2+ Cells	12.0044		tumour: % Stain 1 2+ Cells	14.5269		tumour: % Stain 1 2+ Cells	9.1343		tumour: % Stain 1 2+ Cells	14.3728		tumour: % Stain 1 2+ Cells	12.2764		tumour: % Stain 1 2+ Cells	26.5763		tumour: % Stain 1 2+ Cells	12.6984
		tumour: % Stain 1 3+ Cells	13.9214		tumour: % Stain 1 3+ Cells	7.81855		tumour: % Stain 1 3+ Cells	10.8587		tumour: % Stain 1 3+ Cells	5.51096		tumour: % Stain 1 3+ Cells	10.0876		tumour: % Stain 1 3+ Cells	10.5546		tumour: % Stain 1 3+ Cells	21.3845		tumour: % Stain 1 3+ Cells	5.53351
		tumour: Stain 1 H-Score	76.2806		tumour: Stain 1 H-Score	57.3668		tumour: Stain 1 H-Score	74.2601		tumour: Stain 1 H-Score	44.8904		tumour: Stain 1 H-Score	71.8486		tumour: Stain 1 H-Score	67.0841		tumour: Stain 1 H-Score	132.595		tumour: Stain 1 H-Score	54.4753
		tumour: % Stain 2 Positive Cells	0		tumour: % Stain 2 Positive Cells	0		tumour: % Stain 2 Positive Cells	0		tumour: % Stain 2 Positive Cells	0		tumour: % Stain 2 Positive Cells	0		tumour: % Stain 2 Positive Cells	0		tumour: % Stain 2 Positive Cells	0		tumour: % Stain 2 Positive Cells	0
		tumour: % Stain 2 0+ Cells	100		tumour: % Stain 2 0+ Cells	100		tumour: % Stain 2 0+ Cells	100		tumour: % Stain 2 0+ Cells	100		tumour: % Stain 2 0+ Cells	100		tumour: % Stain 2 0+ Cells	100		tumour: % Stain 2 0+ Cells	100		tumour: % Stain 2 0+ Cells	100
		tumour: % Stain 2 1+ Cells	0		tumour: % Stain 2 1+ Cells	0		tumour: % Stain 2 1+ Cells	0		tumour: % Stain 2 1+ Cells	0		tumour: % Stain 2 1+ Cells	0		tumour: % Stain 2 1+ Cells	0		tumour: % Stain 2 1+ Cells	0		tumour: % Stain 2 1+ Cells	0
		tumour: % Stain 2 2+ Cells	0		tumour: % Stain 2 2+ Cells	0		tumour: % Stain 2 2+ Cells	0		tumour: % Stain 2 2+ Cells	0		tumour: % Stain 2 2+ Cells	0		tumour: % Stain 2 2+ Cells	0		tumour: % Stain 2 2+ Cells	0		tumour: % Stain 2 2+ Cells	0
		tumour: % Stain 2 3+ Cells	0		tumour: % Stain 2 3+ Cells	0		tumour: % Stain 2 3+ Cells	0		tumour: % Stain 2 3+ Cells	0		tumour: % Stain 2 3+ Cells	0		tumour: % Stain 2 3+ Cells	0		tumour: % Stain 2 3+ Cells	0		tumour: % Stain 2 3+ Cells	0
		tumour: Stain 2 H-Score	0		tumour: Stain 2 H-Score	0		tumour: Stain 2 H-Score	0		tumour: Stain 2 H-Score	0		tumour: Stain 2 H-Score	0		tumour: Stain 2 H-Score	0		tumour: Stain 2 H-Score	0		tumour: Stain 2 H-Score	0
		tumour: % Dual Positive Cells	0		tumour: % Dual Positive Cells	0		tumour: % Dual Positive Cells	0		tumour: % Dual Positive Cells	0		tumour: % Dual Positive Cells	0		tumour: % Dual Positive Cells	0		tumour: % Dual Positive Cells	0		tumour: % Dual Positive Cells	0
		tumour: % Dual Negative Cells	63.9957		tumour: % Dual Negative Cells	70.2748		tumour: % Dual Negative Cells	61.9842		tumour: % Dual Negative Cells	75.2658		tumour: % Dual Negative Cells	62.6994		tumour: % Dual Negative Cells	66.3014		tumour: % Dual Negative Cells	36.7504		tumour: % Dual Negative Cells	69.2901
		tumour: Avg Stain 1 Nuclear OD	0.191958		tumour: Avg Stain 1 Nuclear OD	0.147247		tumour: Avg Stain 1 Nuclear OD	0.182401		tumour: Avg Stain 1 Nuclear OD	0.118159		tumour: Avg Stain 1 Nuclear OD	0.175148		tumour: Avg Stain 1 Nuclear OD	0.170574		tumour: Avg Stain 1 Nuclear OD	0.303934		tumour: Avg Stain 1 Nuclear OD	0.137229
		tumour: Avg Stain 2 Nuclear OD	0.0459652		tumour: Avg Stain 2 Nuclear OD	0.0430277		tumour: Avg Stain 2 Nuclear OD	0.0435973		tumour: Avg Stain 2 Nuclear OD	0.040157		tumour: Avg Stain 2 Nuclear OD	0.0421539		tumour: Avg Stain 2 Nuclear OD	0.0440937		tumour: Avg Stain 2 Nuclear OD	0.0515972		tumour: Avg Stain 2 Nuclear OD	0.0393092
		tumour: Avg Stain 1 Cytoplasmic OD	0.0590246		tumour: Avg Stain 1 Cytoplasmic OD	0.0508762		tumour: Avg Stain 1 Cytoplasmic OD	0.0574521		tumour: Avg Stain 1 Cytoplasmic OD	0.0468312		tumour: Avg Stain 1 Cytoplasmic OD	0.0570223		tumour: Avg Stain 1 Cytoplasmic OD	0.054534		tumour: Avg Stain 1 Cytoplasmic OD	0.0823376		tumour: Avg Stain 1 Cytoplasmic OD	0.0503715
		tumour: Avg Stain 2 Cytoplasmic OD	0.0321712		tumour: Avg Stain 2 Cytoplasmic OD	0.0322264		tumour: Avg Stain 2 Cytoplasmic OD	0.0320095		tumour: Avg Stain 2 Cytoplasmic OD	0.0321521		tumour: Avg Stain 2 Cytoplasmic OD	0.0319817		tumour: Avg Stain 2 Cytoplasmic OD	0.0321935		tumour: Avg Stain 2 Cytoplasmic OD	0.0322461		tumour: Avg Stain 2 Cytoplasmic OD	0.0319763
		tumour: Avg Cell Area (µm²)	100.702		tumour: Avg Cell Area (µm²)	95.7485		tumour: Avg Cell Area (µm²)	98.7239		tumour: Avg Cell Area (µm²)	97.6574		tumour: Avg Cell Area (µm²)	97.4702		tumour: Avg Cell Area (µm²)	100.109		tumour: Avg Cell Area (µm²)	101.533		tumour: Avg Cell Area (µm²)	100.635
		tumour: Avg Cytoplasm Area (µm²)	75.1714		tumour: Avg Cytoplasm Area (µm²)	70.2796		tumour: Avg Cytoplasm Area (µm²)	75.7999		tumour: Avg Cytoplasm Area (µm²)	73.9334		tumour: Avg Cytoplasm Area (µm²)	74.0607		tumour: Avg Cytoplasm Area (µm²)	76.1318		tumour: Avg Cytoplasm Area (µm²)	74.2252		tumour: Avg Cytoplasm Area (µm²)	78.983
		tumour: Avg Nucleus Area (µm²)	25.5308		tumour: Avg Nucleus Area (µm²)	25.4689		tumour: Avg Nucleus Area (µm²)	22.924		tumour: Avg Nucleus Area (µm²)	23.7241		tumour: Avg Nucleus Area (µm²)	23.4095		tumour: Avg Nucleus Area (µm²)	23.977		tumour: Avg Nucleus Area (µm²)	27.3082		tumour: Avg Nucleus Area (µm²)	21.6516
		tumour: Avg Nucleus Perimeter (µm)	10.0536		tumour: Avg Nucleus Perimeter (µm)	10.0382		tumour: Avg Nucleus Perimeter (µm)	9.06983		tumour: Avg Nucleus Perimeter (µm)	9.3921		tumour: Avg Nucleus Perimeter (µm)	9.26821		tumour: Avg Nucleus Perimeter (µm)	9.45824		tumour: Avg Nucleus Perimeter (µm)	10.7326		tumour: Avg Nucleus Perimeter (µm)	8.58127
		tumour: Avg Nucleus Roundness	0.688718		tumour: Avg Nucleus Roundness	0.683676		tumour: Avg Nucleus Roundness	0.694751		tumour: Avg Nucleus Roundness	0.68696		tumour: Avg Nucleus Roundness	0.690816		tumour: Avg Nucleus Roundness	0.692648		tumour: Avg Nucleus Roundness	0.691078		tumour: Avg Nucleus Roundness	0.69381
		tumour: Tissue Area (µm²)	1045430		tumour: Tissue Area (µm²)	1090540		tumour: Tissue Area (µm²)	1079820		tumour: Tissue Area (µm²)	995793		tumour: Tissue Area (µm²)	1384190		tumour: Tissue Area (µm²)	1008110		tumour: Tissue Area (µm²)	1966990		tumour: Tissue Area (µm²)	1097120
		BSNA13.1b	HOM
		Name	Value		Name	Value		Name	Value		Name	Value		Name	Value		Name	Value		Name	Value		Name	Value
		Classified Area (mm²)	1.8308		Classified Area (mm²)	1.69176		Classified Area (mm²)	1.22551		Classified Area (mm²)	1.04996		Classified Area (mm²)	1.18754		Classified Area (mm²)	1.17792		Classified Area (mm²)	0.97332		Classified Area (mm²)	1.1768
		tumour Area (mm²)	1.80226		tumour Area (mm²)	1.49749		tumour Area (mm²)	0.66093		tumour Area (mm²)	1.04876		tumour Area (mm²)	0.2463		tumour Area (mm²)	1.15774		tumour Area (mm²)	0.95645		tumour Area (mm²)	0.70104
		empty Area (mm²)	0		empty Area (mm²)	0.17907		empty Area (mm²)	0.0001		empty Area (mm²)	0.00025		empty Area (mm²)	0.00172		empty Area (mm²)	0.01446		empty Area (mm²)	0.00024		empty Area (mm²)	0.00238
		necrosis Area (mm²)	0		necrosis Area (mm²)	0.01249		necrosis Area (mm²)	0		necrosis Area (mm²)	6e-05		necrosis Area (mm²)	0		necrosis Area (mm²)	0.00271		necrosis Area (mm²)	0		necrosis Area (mm²)	0.0083
		normal Area (mm²)	0.02854		normal Area (mm²)	0.0027		normal Area (mm²)	0.56448		normal Area (mm²)	0.00088		normal Area (mm²)	0.93952		normal Area (mm²)	0.00301		normal Area (mm²)	0.01662		normal Area (mm²)	0.46507
		Total Cells	7406		Total Cells	6262		Total Cells	4025		Total Cells	4849		Total Cells	1658		Total Cells	5336		Total Cells	4828		Total Cells	3826
		Stain 1 Positive Cells	4067		Stain 1 Positive Cells	4254		Stain 1 Positive Cells	803		Stain 1 Positive Cells	2951		Stain 1 Positive Cells	141		Stain 1 Positive Cells	3272		Stain 1 Positive Cells	2242		Stain 1 Positive Cells	843
		Stain 1 0+ Cells	3339		Stain 1 0+ Cells	2008		Stain 1 0+ Cells	3222		Stain 1 0+ Cells	1898		Stain 1 0+ Cells	1517		Stain 1 0+ Cells	2064		Stain 1 0+ Cells	2586		Stain 1 0+ Cells	2983
		Stain 1 1+ Cells	1244		Stain 1 1+ Cells	822		Stain 1 1+ Cells	543		Stain 1 1+ Cells	699		Stain 1 1+ Cells	113		Stain 1 1+ Cells	705		Stain 1 1+ Cells	601		Stain 1 1+ Cells	613
		Stain 1 2+ Cells	1463		Stain 1 2+ Cells	1425		Stain 1 2+ Cells	241		Stain 1 2+ Cells	1147		Stain 1 2+ Cells	24		Stain 1 2+ Cells	1204		Stain 1 2+ Cells	846		Stain 1 2+ Cells	209
		Stain 1 3+ Cells	1360		Stain 1 3+ Cells	2007		Stain 1 3+ Cells	19		Stain 1 3+ Cells	1105		Stain 1 3+ Cells	4		Stain 1 3+ Cells	1363		Stain 1 3+ Cells	795		Stain 1 3+ Cells	21
		Stain 2 Positive Cells	0		Stain 2 Positive Cells	0		Stain 2 Positive Cells	0		Stain 2 Positive Cells	0		Stain 2 Positive Cells	0		Stain 2 Positive Cells	0		Stain 2 Positive Cells	0		Stain 2 Positive Cells	0
		Stain 2 0+ Cells	7406		Stain 2 0+ Cells	6262		Stain 2 0+ Cells	4025		Stain 2 0+ Cells	4849		Stain 2 0+ Cells	1658		Stain 2 0+ Cells	5336		Stain 2 0+ Cells	4828		Stain 2 0+ Cells	3826
		Stain 2 1+ Cells	0		Stain 2 1+ Cells	0		Stain 2 1+ Cells	0		Stain 2 1+ Cells	0		Stain 2 1+ Cells	0		Stain 2 1+ Cells	0		Stain 2 1+ Cells	0		Stain 2 1+ Cells	0
		Stain 2 2+ Cells	0		Stain 2 2+ Cells	0		Stain 2 2+ Cells	0		Stain 2 2+ Cells	0		Stain 2 2+ Cells	0		Stain 2 2+ Cells	0		Stain 2 2+ Cells	0		Stain 2 2+ Cells	0
		Stain 2 3+ Cells	0		Stain 2 3+ Cells	0		Stain 2 3+ Cells	0		Stain 2 3+ Cells	0		Stain 2 3+ Cells	0		Stain 2 3+ Cells	0		Stain 2 3+ Cells	0		Stain 2 3+ Cells	0
		Dual Positive Cells	0		Dual Positive Cells	0		Dual Positive Cells	0		Dual Positive Cells	0		Dual Positive Cells	0		Dual Positive Cells	0		Dual Positive Cells	0		Dual Positive Cells	0
		Dual Negative Cells	3339		Dual Negative Cells	2008		Dual Negative Cells	3222		Dual Negative Cells	1898		Dual Negative Cells	1517		Dual Negative Cells	2064		Dual Negative Cells	2586		Dual Negative Cells	2983
		% Stain 1 Positive Cells	54.9149		% Stain 1 Positive Cells	67.9336		% Stain 1 Positive Cells	19.9503		% Stain 1 Positive Cells	60.8579		% Stain 1 Positive Cells	8.50422		% Stain 1 Positive Cells	61.3193		% Stain 1 Positive Cells	46.4374		% Stain 1 Positive Cells	22.0335		42.7439
		% Stain 1 0+ Cells	45.0851		% Stain 1 0+ Cells	32.0664		% Stain 1 0+ Cells	80.0497		% Stain 1 0+ Cells	39.1421		% Stain 1 0+ Cells	91.4958		% Stain 1 0+ Cells	38.6807		% Stain 1 0+ Cells	53.5626		% Stain 1 0+ Cells	77.9665
		% Stain 1 1+ Cells	16.7972		% Stain 1 1+ Cells	13.1268		% Stain 1 1+ Cells	13.4907		% Stain 1 1+ Cells	14.4153		% Stain 1 1+ Cells	6.81544		% Stain 1 1+ Cells	13.2121		% Stain 1 1+ Cells	12.4482		% Stain 1 1+ Cells	16.022
		% Stain 1 2+ Cells	19.7543		% Stain 1 2+ Cells	22.7563		% Stain 1 2+ Cells	5.98758		% Stain 1 2+ Cells	23.6544		% Stain 1 2+ Cells	1.44753		% Stain 1 2+ Cells	22.5637		% Stain 1 2+ Cells	17.5228		% Stain 1 2+ Cells	5.46262
		% Stain 1 3+ Cells	18.3635		% Stain 1 3+ Cells	32.0505		% Stain 1 3+ Cells	0.47205		% Stain 1 3+ Cells	22.7882		% Stain 1 3+ Cells	0.241255		% Stain 1 3+ Cells	25.5435		% Stain 1 3+ Cells	16.4664		% Stain 1 3+ Cells	0.548876
		Stain 1 H-Score	111.396		Stain 1 H-Score	154.791		Stain 1 H-Score	26.882		Stain 1 H-Score	130.089		Stain 1 H-Score	10.4343		Stain 1 H-Score	134.97		Stain 1 H-Score	96.8931		Stain 1 H-Score	28.5938
		% Stain 2 Positive Cells	0		% Stain 2 Positive Cells	0		% Stain 2 Positive Cells	0		% Stain 2 Positive Cells	0		% Stain 2 Positive Cells	0		% Stain 2 Positive Cells	0		% Stain 2 Positive Cells	0		% Stain 2 Positive Cells	0
		% Stain 2 0+ Cells	100		% Stain 2 0+ Cells	100		% Stain 2 0+ Cells	100		% Stain 2 0+ Cells	100		% Stain 2 0+ Cells	100		% Stain 2 0+ Cells	100		% Stain 2 0+ Cells	100		% Stain 2 0+ Cells	100
		% Stain 2 1+ Cells	0		% Stain 2 1+ Cells	0		% Stain 2 1+ Cells	0		% Stain 2 1+ Cells	0		% Stain 2 1+ Cells	0		% Stain 2 1+ Cells	0		% Stain 2 1+ Cells	0		% Stain 2 1+ Cells	0
		% Stain 2 2+ Cells	0		% Stain 2 2+ Cells	0		% Stain 2 2+ Cells	0		% Stain 2 2+ Cells	0		% Stain 2 2+ Cells	0		% Stain 2 2+ Cells	0		% Stain 2 2+ Cells	0		% Stain 2 2+ Cells	0
		% Stain 2 3+ Cells	0		% Stain 2 3+ Cells	0		% Stain 2 3+ Cells	0		% Stain 2 3+ Cells	0		% Stain 2 3+ Cells	0		% Stain 2 3+ Cells	0		% Stain 2 3+ Cells	0		% Stain 2 3+ Cells	0
		Stain 2 H-Score	0		Stain 2 H-Score	0		Stain 2 H-Score	0		Stain 2 H-Score	0		Stain 2 H-Score	0		Stain 2 H-Score	0		Stain 2 H-Score	0		Stain 2 H-Score	0
		% Dual Positive Cells	0		% Dual Positive Cells	0		% Dual Positive Cells	0		% Dual Positive Cells	0		% Dual Positive Cells	0		% Dual Positive Cells	0		% Dual Positive Cells	0		% Dual Positive Cells	0
		% Dual Negative Cells	45.0851		% Dual Negative Cells	32.0664		% Dual Negative Cells	80.0497		% Dual Negative Cells	39.1421		% Dual Negative Cells	91.4958		% Dual Negative Cells	38.6807		% Dual Negative Cells	53.5626		% Dual Negative Cells	77.9665
		Avg Stain 1 Nuclear OD	0.263275		Avg Stain 1 Nuclear OD	0.370326		Avg Stain 1 Nuclear OD	0.0824738		Avg Stain 1 Nuclear OD	0.30502		Avg Stain 1 Nuclear OD	0.0535131		Avg Stain 1 Nuclear OD	0.322244		Avg Stain 1 Nuclear OD	0.235697		Avg Stain 1 Nuclear OD	0.0859573
		Avg Stain 2 Nuclear OD	0.0476651		Avg Stain 2 Nuclear OD	0.0616582		Avg Stain 2 Nuclear OD	0.0387203		Avg Stain 2 Nuclear OD	0.0565926		Avg Stain 2 Nuclear OD	0.0406455		Avg Stain 2 Nuclear OD	0.0559552		Avg Stain 2 Nuclear OD	0.0505461		Avg Stain 2 Nuclear OD	0.0377973
		Avg Stain 1 Cytoplasmic OD	0.0764105		Avg Stain 1 Cytoplasmic OD	0.0839921		Avg Stain 1 Cytoplasmic OD	0.0494291		Avg Stain 1 Cytoplasmic OD	0.0747351		Avg Stain 1 Cytoplasmic OD	0.0400874		Avg Stain 1 Cytoplasmic OD	0.0837021		Avg Stain 1 Cytoplasmic OD	0.0664896		Avg Stain 1 Cytoplasmic OD	0.047484
		Avg Stain 2 Cytoplasmic OD	0.0322446		Avg Stain 2 Cytoplasmic OD	0.0324586		Avg Stain 2 Cytoplasmic OD	0.0325529		Avg Stain 2 Cytoplasmic OD	0.0324054		Avg Stain 2 Cytoplasmic OD	0.0330349		Avg Stain 2 Cytoplasmic OD	0.0325275		Avg Stain 2 Cytoplasmic OD	0.0323848		Avg Stain 2 Cytoplasmic OD	0.0324534
		Avg Cell Area (µm²)	106.021		Avg Cell Area (µm²)	101.496		Avg Cell Area (µm²)	84.5443		Avg Cell Area (µm²)	94.9723		Avg Cell Area (µm²)	80.6485		Avg Cell Area (µm²)	95.8931		Avg Cell Area (µm²)	89.4283		Avg Cell Area (µm²)	85.0897
		Avg Cytoplasm Area (µm²)	78.7988		Avg Cytoplasm Area (µm²)	75.3249		Avg Cytoplasm Area (µm²)	60.2979		Avg Cytoplasm Area (µm²)	71.5237		Avg Cytoplasm Area (µm²)	56.4692		Avg Cytoplasm Area (µm²)	69.7991		Avg Cytoplasm Area (µm²)	66.6782		Avg Cytoplasm Area (µm²)	63.9036
		Avg Nucleus Area (µm²)	27.2226		Avg Nucleus Area (µm²)	26.1706		Avg Nucleus Area (µm²)	24.2464		Avg Nucleus Area (µm²)	23.4486		Avg Nucleus Area (µm²)	24.1793		Avg Nucleus Area (µm²)	26.0939		Avg Nucleus Area (µm²)	22.7501		Avg Nucleus Area (µm²)	21.186
		Avg Nucleus Perimeter (µm)	10.6373		Avg Nucleus Perimeter (µm)	10.3323		Avg Nucleus Perimeter (µm)	9.62073		Avg Nucleus Perimeter (µm)	9.28356		Avg Nucleus Perimeter (µm)	9.5928		Avg Nucleus Perimeter (µm)	10.3112		Avg Nucleus Perimeter (µm)	9.01191		Avg Nucleus Perimeter (µm)	8.41927
		Avg Nucleus Roundness	0.704106		Avg Nucleus Roundness	0.692437		Avg Nucleus Roundness	0.675647		Avg Nucleus Roundness	0.690779		Avg Nucleus Roundness	0.666825		Avg Nucleus Roundness	0.697204		Avg Nucleus Roundness	0.683455		Avg Nucleus Roundness	0.682468
		Tissue Area (µm²)	1803370		Tissue Area (µm²)	1379670		Tissue Area (µm²)	698931		Tissue Area (µm²)	1037060		Tissue Area (µm²)	279120		Tissue Area (µm²)	1098710		Tissue Area (µm²)	939365		Tissue Area (µm²)	706420
		tumour: Total Cells	7406		tumour: Total Cells	6262		tumour: Total Cells	4025		tumour: Total Cells	4849		tumour: Total Cells	1658		tumour: Total Cells	5336		tumour: Total Cells	4828		tumour: Total Cells	3826
		tumour: Stain 1 Positive Cells	4067		tumour: Stain 1 Positive Cells	4254		tumour: Stain 1 Positive Cells	803		tumour: Stain 1 Positive Cells	2951		tumour: Stain 1 Positive Cells	141		tumour: Stain 1 Positive Cells	3272		tumour: Stain 1 Positive Cells	2242		tumour: Stain 1 Positive Cells	843
		tumour: Stain 1 0+ Cells	3339		tumour: Stain 1 0+ Cells	2008		tumour: Stain 1 0+ Cells	3222		tumour: Stain 1 0+ Cells	1898		tumour: Stain 1 0+ Cells	1517		tumour: Stain 1 0+ Cells	2064		tumour: Stain 1 0+ Cells	2586		tumour: Stain 1 0+ Cells	2983
		tumour: Stain 1 1+ Cells	1244		tumour: Stain 1 1+ Cells	822		tumour: Stain 1 1+ Cells	543		tumour: Stain 1 1+ Cells	699		tumour: Stain 1 1+ Cells	113		tumour: Stain 1 1+ Cells	705		tumour: Stain 1 1+ Cells	601		tumour: Stain 1 1+ Cells	613
		tumour: Stain 1 2+ Cells	1463		tumour: Stain 1 2+ Cells	1425		tumour: Stain 1 2+ Cells	241		tumour: Stain 1 2+ Cells	1147		tumour: Stain 1 2+ Cells	24		tumour: Stain 1 2+ Cells	1204		tumour: Stain 1 2+ Cells	846		tumour: Stain 1 2+ Cells	209
		tumour: Stain 1 3+ Cells	1360		tumour: Stain 1 3+ Cells	2007		tumour: Stain 1 3+ Cells	19		tumour: Stain 1 3+ Cells	1105		tumour: Stain 1 3+ Cells	4		tumour: Stain 1 3+ Cells	1363		tumour: Stain 1 3+ Cells	795		tumour: Stain 1 3+ Cells	21
		tumour: Stain 2 Positive Cells	0		tumour: Stain 2 Positive Cells	0		tumour: Stain 2 Positive Cells	0		tumour: Stain 2 Positive Cells	0		tumour: Stain 2 Positive Cells	0		tumour: Stain 2 Positive Cells	0		tumour: Stain 2 Positive Cells	0		tumour: Stain 2 Positive Cells	0
		tumour: Stain 2 0+ Cells	7406		tumour: Stain 2 0+ Cells	6262		tumour: Stain 2 0+ Cells	4025		tumour: Stain 2 0+ Cells	4849		tumour: Stain 2 0+ Cells	1658		tumour: Stain 2 0+ Cells	5336		tumour: Stain 2 0+ Cells	4828		tumour: Stain 2 0+ Cells	3826
		tumour: Stain 2 1+ Cells	0		tumour: Stain 2 1+ Cells	0		tumour: Stain 2 1+ Cells	0		tumour: Stain 2 1+ Cells	0		tumour: Stain 2 1+ Cells	0		tumour: Stain 2 1+ Cells	0		tumour: Stain 2 1+ Cells	0		tumour: Stain 2 1+ Cells	0
		tumour: Stain 2 2+ Cells	0		tumour: Stain 2 2+ Cells	0		tumour: Stain 2 2+ Cells	0		tumour: Stain 2 2+ Cells	0		tumour: Stain 2 2+ Cells	0		tumour: Stain 2 2+ Cells	0		tumour: Stain 2 2+ Cells	0		tumour: Stain 2 2+ Cells	0
		tumour: Stain 2 3+ Cells	0		tumour: Stain 2 3+ Cells	0		tumour: Stain 2 3+ Cells	0		tumour: Stain 2 3+ Cells	0		tumour: Stain 2 3+ Cells	0		tumour: Stain 2 3+ Cells	0		tumour: Stain 2 3+ Cells	0		tumour: Stain 2 3+ Cells	0
		tumour: Dual Positive Cells	0		tumour: Dual Positive Cells	0		tumour: Dual Positive Cells	0		tumour: Dual Positive Cells	0		tumour: Dual Positive Cells	0		tumour: Dual Positive Cells	0		tumour: Dual Positive Cells	0		tumour: Dual Positive Cells	0
		tumour: Dual Negative Cells	3339		tumour: Dual Negative Cells	2008		tumour: Dual Negative Cells	3222		tumour: Dual Negative Cells	1898		tumour: Dual Negative Cells	1517		tumour: Dual Negative Cells	2064		tumour: Dual Negative Cells	2586		tumour: Dual Negative Cells	2983
		tumour: % Stain 1 Positive Cells	54.9149		tumour: % Stain 1 Positive Cells	67.9336		tumour: % Stain 1 Positive Cells	19.9503		tumour: % Stain 1 Positive Cells	60.8579		tumour: % Stain 1 Positive Cells	8.50422		tumour: % Stain 1 Positive Cells	61.3193		tumour: % Stain 1 Positive Cells	46.4374		tumour: % Stain 1 Positive Cells	22.0335
		tumour: % Stain 1 0+ Cells	45.0851		tumour: % Stain 1 0+ Cells	32.0664		tumour: % Stain 1 0+ Cells	80.0497		tumour: % Stain 1 0+ Cells	39.1421		tumour: % Stain 1 0+ Cells	91.4958		tumour: % Stain 1 0+ Cells	38.6807		tumour: % Stain 1 0+ Cells	53.5626		tumour: % Stain 1 0+ Cells	77.9665
		tumour: % Stain 1 1+ Cells	16.7972		tumour: % Stain 1 1+ Cells	13.1268		tumour: % Stain 1 1+ Cells	13.4907		tumour: % Stain 1 1+ Cells	14.4153		tumour: % Stain 1 1+ Cells	6.81544		tumour: % Stain 1 1+ Cells	13.2121		tumour: % Stain 1 1+ Cells	12.4482		tumour: % Stain 1 1+ Cells	16.022
		tumour: % Stain 1 2+ Cells	19.7543		tumour: % Stain 1 2+ Cells	22.7563		tumour: % Stain 1 2+ Cells	5.98758		tumour: % Stain 1 2+ Cells	23.6544		tumour: % Stain 1 2+ Cells	1.44753		tumour: % Stain 1 2+ Cells	22.5637		tumour: % Stain 1 2+ Cells	17.5228		tumour: % Stain 1 2+ Cells	5.46262
		tumour: % Stain 1 3+ Cells	18.3635		tumour: % Stain 1 3+ Cells	32.0505		tumour: % Stain 1 3+ Cells	0.47205		tumour: % Stain 1 3+ Cells	22.7882		tumour: % Stain 1 3+ Cells	0.241255		tumour: % Stain 1 3+ Cells	25.5435		tumour: % Stain 1 3+ Cells	16.4664		tumour: % Stain 1 3+ Cells	0.548876
		tumour: Stain 1 H-Score	111.396		tumour: Stain 1 H-Score	154.791		tumour: Stain 1 H-Score	26.882		tumour: Stain 1 H-Score	130.089		tumour: Stain 1 H-Score	10.4343		tumour: Stain 1 H-Score	134.97		tumour: Stain 1 H-Score	96.8931		tumour: Stain 1 H-Score	28.5938
		tumour: % Stain 2 Positive Cells	0		tumour: % Stain 2 Positive Cells	0		tumour: % Stain 2 Positive Cells	0		tumour: % Stain 2 Positive Cells	0		tumour: % Stain 2 Positive Cells	0		tumour: % Stain 2 Positive Cells	0		tumour: % Stain 2 Positive Cells	0		tumour: % Stain 2 Positive Cells	0
		tumour: % Stain 2 0+ Cells	100		tumour: % Stain 2 0+ Cells	100		tumour: % Stain 2 0+ Cells	100		tumour: % Stain 2 0+ Cells	100		tumour: % Stain 2 0+ Cells	100		tumour: % Stain 2 0+ Cells	100		tumour: % Stain 2 0+ Cells	100		tumour: % Stain 2 0+ Cells	100
		tumour: % Stain 2 1+ Cells	0		tumour: % Stain 2 1+ Cells	0		tumour: % Stain 2 1+ Cells	0		tumour: % Stain 2 1+ Cells	0		tumour: % Stain 2 1+ Cells	0		tumour: % Stain 2 1+ Cells	0		tumour: % Stain 2 1+ Cells	0		tumour: % Stain 2 1+ Cells	0
		tumour: % Stain 2 2+ Cells	0		tumour: % Stain 2 2+ Cells	0		tumour: % Stain 2 2+ Cells	0		tumour: % Stain 2 2+ Cells	0		tumour: % Stain 2 2+ Cells	0		tumour: % Stain 2 2+ Cells	0		tumour: % Stain 2 2+ Cells	0		tumour: % Stain 2 2+ Cells	0
		tumour: % Stain 2 3+ Cells	0		tumour: % Stain 2 3+ Cells	0		tumour: % Stain 2 3+ Cells	0		tumour: % Stain 2 3+ Cells	0		tumour: % Stain 2 3+ Cells	0		tumour: % Stain 2 3+ Cells	0		tumour: % Stain 2 3+ Cells	0		tumour: % Stain 2 3+ Cells	0
		tumour: Stain 2 H-Score	0		tumour: Stain 2 H-Score	0		tumour: Stain 2 H-Score	0		tumour: Stain 2 H-Score	0		tumour: Stain 2 H-Score	0		tumour: Stain 2 H-Score	0		tumour: Stain 2 H-Score	0		tumour: Stain 2 H-Score	0
		tumour: % Dual Positive Cells	0		tumour: % Dual Positive Cells	0		tumour: % Dual Positive Cells	0		tumour: % Dual Positive Cells	0		tumour: % Dual Positive Cells	0		tumour: % Dual Positive Cells	0		tumour: % Dual Positive Cells	0		tumour: % Dual Positive Cells	0
		tumour: % Dual Negative Cells	45.0851		tumour: % Dual Negative Cells	32.0664		tumour: % Dual Negative Cells	80.0497		tumour: % Dual Negative Cells	39.1421		tumour: % Dual Negative Cells	91.4958		tumour: % Dual Negative Cells	38.6807		tumour: % Dual Negative Cells	53.5626		tumour: % Dual Negative Cells	77.9665
		tumour: Avg Stain 1 Nuclear OD	0.263275		tumour: Avg Stain 1 Nuclear OD	0.370326		tumour: Avg Stain 1 Nuclear OD	0.0824738		tumour: Avg Stain 1 Nuclear OD	0.30502		tumour: Avg Stain 1 Nuclear OD	0.0535131		tumour: Avg Stain 1 Nuclear OD	0.322244		tumour: Avg Stain 1 Nuclear OD	0.235697		tumour: Avg Stain 1 Nuclear OD	0.0859573
		tumour: Avg Stain 2 Nuclear OD	0.0476651		tumour: Avg Stain 2 Nuclear OD	0.0616582		tumour: Avg Stain 2 Nuclear OD	0.0387203		tumour: Avg Stain 2 Nuclear OD	0.0565926		tumour: Avg Stain 2 Nuclear OD	0.0406455		tumour: Avg Stain 2 Nuclear OD	0.0559552		tumour: Avg Stain 2 Nuclear OD	0.0505461		tumour: Avg Stain 2 Nuclear OD	0.0377973
		tumour: Avg Stain 1 Cytoplasmic OD	0.0764105		tumour: Avg Stain 1 Cytoplasmic OD	0.0839921		tumour: Avg Stain 1 Cytoplasmic OD	0.0494291		tumour: Avg Stain 1 Cytoplasmic OD	0.0747351		tumour: Avg Stain 1 Cytoplasmic OD	0.0400874		tumour: Avg Stain 1 Cytoplasmic OD	0.0837021		tumour: Avg Stain 1 Cytoplasmic OD	0.0664896		tumour: Avg Stain 1 Cytoplasmic OD	0.047484
		tumour: Avg Stain 2 Cytoplasmic OD	0.0322446		tumour: Avg Stain 2 Cytoplasmic OD	0.0324586		tumour: Avg Stain 2 Cytoplasmic OD	0.0325529		tumour: Avg Stain 2 Cytoplasmic OD	0.0324054		tumour: Avg Stain 2 Cytoplasmic OD	0.0330349		tumour: Avg Stain 2 Cytoplasmic OD	0.0325275		tumour: Avg Stain 2 Cytoplasmic OD	0.0323848		tumour: Avg Stain 2 Cytoplasmic OD	0.0324534
		tumour: Avg Cell Area (µm²)	106.021		tumour: Avg Cell Area (µm²)	101.496		tumour: Avg Cell Area (µm²)	84.5443		tumour: Avg Cell Area (µm²)	94.9723		tumour: Avg Cell Area (µm²)	80.6485		tumour: Avg Cell Area (µm²)	95.8931		tumour: Avg Cell Area (µm²)	89.4283		tumour: Avg Cell Area (µm²)	85.0897
		tumour: Avg Cytoplasm Area (µm²)	78.7988		tumour: Avg Cytoplasm Area (µm²)	75.3249		tumour: Avg Cytoplasm Area (µm²)	60.2979		tumour: Avg Cytoplasm Area (µm²)	71.5237		tumour: Avg Cytoplasm Area (µm²)	56.4692		tumour: Avg Cytoplasm Area (µm²)	69.7991		tumour: Avg Cytoplasm Area (µm²)	66.6782		tumour: Avg Cytoplasm Area (µm²)	63.9036
		tumour: Avg Nucleus Area (µm²)	27.2226		tumour: Avg Nucleus Area (µm²)	26.1706		tumour: Avg Nucleus Area (µm²)	24.2464		tumour: Avg Nucleus Area (µm²)	23.4486		tumour: Avg Nucleus Area (µm²)	24.1793		tumour: Avg Nucleus Area (µm²)	26.0939		tumour: Avg Nucleus Area (µm²)	22.7501		tumour: Avg Nucleus Area (µm²)	21.186
		tumour: Avg Nucleus Perimeter (µm)	10.6373		tumour: Avg Nucleus Perimeter (µm)	10.3323		tumour: Avg Nucleus Perimeter (µm)	9.62073		tumour: Avg Nucleus Perimeter (µm)	9.28356		tumour: Avg Nucleus Perimeter (µm)	9.5928		tumour: Avg Nucleus Perimeter (µm)	10.3112		tumour: Avg Nucleus Perimeter (µm)	9.01191		tumour: Avg Nucleus Perimeter (µm)	8.41927
		tumour: Avg Nucleus Roundness	0.704106		tumour: Avg Nucleus Roundness	0.692437		tumour: Avg Nucleus Roundness	0.675647		tumour: Avg Nucleus Roundness	0.690779		tumour: Avg Nucleus Roundness	0.666825		tumour: Avg Nucleus Roundness	0.697204		tumour: Avg Nucleus Roundness	0.683455		tumour: Avg Nucleus Roundness	0.682468
		tumour: Tissue Area (µm²)	1803370		tumour: Tissue Area (µm²)	1379670		tumour: Tissue Area (µm²)	698931		tumour: Tissue Area (µm²)	1037060		tumour: Tissue Area (µm²)	279120		tumour: Tissue Area (µm²)	1098710		tumour: Tissue Area (µm²)	939365		tumour: Tissue Area (µm²)	706420
		BSNA37.2b	HOM
		Name	Value		Name	Value		Name	Value		Name	Value		Name	Value		Name	Value		Name	Value		Name	Value
		Classified Area (mm²)	1.12775		Classified Area (mm²)	1.35723		Classified Area (mm²)	0.81063		Classified Area (mm²)	0.93081		Classified Area (mm²)	0.91306		Classified Area (mm²)	1.07266		Classified Area (mm²)	0.65844		Classified Area (mm²)	1.07642
		tumour Area (mm²)	1.09848		tumour Area (mm²)	1.30174		tumour Area (mm²)	0.77714		tumour Area (mm²)	0.92792		tumour Area (mm²)	0.90892		tumour Area (mm²)	1.0363		tumour Area (mm²)	0.61648		tumour Area (mm²)	1.07172
		empty Area (mm²)	0		empty Area (mm²)	0		empty Area (mm²)	0.00016		empty Area (mm²)	0		empty Area (mm²)	0		empty Area (mm²)	0		empty Area (mm²)	0		empty Area (mm²)	7e-05
		necrosis Area (mm²)	0		necrosis Area (mm²)	0		necrosis Area (mm²)	0		necrosis Area (mm²)	0		necrosis Area (mm²)	0		necrosis Area (mm²)	0		necrosis Area (mm²)	0		necrosis Area (mm²)	0
		normal Area (mm²)	0.02927		normal Area (mm²)	0.05549		normal Area (mm²)	0.03334		normal Area (mm²)	0.00289		normal Area (mm²)	0.00414		normal Area (mm²)	0.03636		normal Area (mm²)	0.04195		normal Area (mm²)	0.00463
		Total Cells	4515		Total Cells	5605		Total Cells	3265		Total Cells	3764		Total Cells	3459		Total Cells	5049		Total Cells	3115		Total Cells	4208
		Stain 1 Positive Cells	2223		Stain 1 Positive Cells	2642		Stain 1 Positive Cells	1227		Stain 1 Positive Cells	2087		Stain 1 Positive Cells	1772		Stain 1 Positive Cells	1926		Stain 1 Positive Cells	1292		Stain 1 Positive Cells	2446
		Stain 1 0+ Cells	2292		Stain 1 0+ Cells	2963		Stain 1 0+ Cells	2038		Stain 1 0+ Cells	1677		Stain 1 0+ Cells	1687		Stain 1 0+ Cells	3123		Stain 1 0+ Cells	1823		Stain 1 0+ Cells	1762
		Stain 1 1+ Cells	749		Stain 1 1+ Cells	915		Stain 1 1+ Cells	386		Stain 1 1+ Cells	607		Stain 1 1+ Cells	652		Stain 1 1+ Cells	570		Stain 1 1+ Cells	406		Stain 1 1+ Cells	783
		Stain 1 2+ Cells	854		Stain 1 2+ Cells	1027		Stain 1 2+ Cells	458		Stain 1 2+ Cells	854		Stain 1 2+ Cells	720		Stain 1 2+ Cells	778		Stain 1 2+ Cells	525		Stain 1 2+ Cells	957
		Stain 1 3+ Cells	620		Stain 1 3+ Cells	700		Stain 1 3+ Cells	383		Stain 1 3+ Cells	626		Stain 1 3+ Cells	400		Stain 1 3+ Cells	578		Stain 1 3+ Cells	361		Stain 1 3+ Cells	706
		Stain 2 Positive Cells	0		Stain 2 Positive Cells	0		Stain 2 Positive Cells	0		Stain 2 Positive Cells	0		Stain 2 Positive Cells	0		Stain 2 Positive Cells	0		Stain 2 Positive Cells	0		Stain 2 Positive Cells	0
		Stain 2 0+ Cells	4515		Stain 2 0+ Cells	5605		Stain 2 0+ Cells	3265		Stain 2 0+ Cells	3764		Stain 2 0+ Cells	3459		Stain 2 0+ Cells	5049		Stain 2 0+ Cells	3115		Stain 2 0+ Cells	4208
		Stain 2 1+ Cells	0		Stain 2 1+ Cells	0		Stain 2 1+ Cells	0		Stain 2 1+ Cells	0		Stain 2 1+ Cells	0		Stain 2 1+ Cells	0		Stain 2 1+ Cells	0		Stain 2 1+ Cells	0
		Stain 2 2+ Cells	0		Stain 2 2+ Cells	0		Stain 2 2+ Cells	0		Stain 2 2+ Cells	0		Stain 2 2+ Cells	0		Stain 2 2+ Cells	0		Stain 2 2+ Cells	0		Stain 2 2+ Cells	0
		Stain 2 3+ Cells	0		Stain 2 3+ Cells	0		Stain 2 3+ Cells	0		Stain 2 3+ Cells	0		Stain 2 3+ Cells	0		Stain 2 3+ Cells	0		Stain 2 3+ Cells	0		Stain 2 3+ Cells	0
		Dual Positive Cells	0		Dual Positive Cells	0		Dual Positive Cells	0		Dual Positive Cells	0		Dual Positive Cells	0		Dual Positive Cells	0		Dual Positive Cells	0		Dual Positive Cells	0
		Dual Negative Cells	2292		Dual Negative Cells	2963		Dual Negative Cells	2038		Dual Negative Cells	1677		Dual Negative Cells	1687		Dual Negative Cells	3123		Dual Negative Cells	1823		Dual Negative Cells	1762
		% Stain 1 Positive Cells	49.2359		% Stain 1 Positive Cells	47.1365		% Stain 1 Positive Cells	37.5804		% Stain 1 Positive Cells	55.4463		% Stain 1 Positive Cells	51.2287		% Stain 1 Positive Cells	38.1462		% Stain 1 Positive Cells	41.4767		% Stain 1 Positive Cells	58.1274		47.2973
		% Stain 1 0+ Cells	50.7641		% Stain 1 0+ Cells	52.8635		% Stain 1 0+ Cells	62.4196		% Stain 1 0+ Cells	44.5537		% Stain 1 0+ Cells	48.7713		% Stain 1 0+ Cells	61.8538		% Stain 1 0+ Cells	58.5233		% Stain 1 0+ Cells	41.8726
		% Stain 1 1+ Cells	16.5891		% Stain 1 1+ Cells	16.3247		% Stain 1 1+ Cells	11.8224		% Stain 1 1+ Cells	16.1265		% Stain 1 1+ Cells	18.8494		% Stain 1 1+ Cells	11.2894		% Stain 1 1+ Cells	13.0337		% Stain 1 1+ Cells	18.6074
		% Stain 1 2+ Cells	18.9147		% Stain 1 2+ Cells	18.3229		% Stain 1 2+ Cells	14.0276		% Stain 1 2+ Cells	22.6886		% Stain 1 2+ Cells	20.8153		% Stain 1 2+ Cells	15.409		% Stain 1 2+ Cells	16.8539		% Stain 1 2+ Cells	22.7424
		% Stain 1 3+ Cells	13.732		% Stain 1 3+ Cells	12.4888		% Stain 1 3+ Cells	11.7305		% Stain 1 3+ Cells	16.6312		% Stain 1 3+ Cells	11.564		% Stain 1 3+ Cells	11.4478		% Stain 1 3+ Cells	11.5891		% Stain 1 3+ Cells	16.7776
		Stain 1 H-Score	95.6146		Stain 1 H-Score	90.4371		Stain 1 H-Score	75.0689		Stain 1 H-Score	111.397		Stain 1 H-Score	95.172		Stain 1 H-Score	76.4508		Stain 1 H-Score	81.5088		Stain 1 H-Score	114.425
		% Stain 2 Positive Cells	0		% Stain 2 Positive Cells	0		% Stain 2 Positive Cells	0		% Stain 2 Positive Cells	0		% Stain 2 Positive Cells	0		% Stain 2 Positive Cells	0		% Stain 2 Positive Cells	0		% Stain 2 Positive Cells	0
		% Stain 2 0+ Cells	100		% Stain 2 0+ Cells	100		% Stain 2 0+ Cells	100		% Stain 2 0+ Cells	100		% Stain 2 0+ Cells	100		% Stain 2 0+ Cells	100		% Stain 2 0+ Cells	100		% Stain 2 0+ Cells	100
		% Stain 2 1+ Cells	0		% Stain 2 1+ Cells	0		% Stain 2 1+ Cells	0		% Stain 2 1+ Cells	0		% Stain 2 1+ Cells	0		% Stain 2 1+ Cells	0		% Stain 2 1+ Cells	0		% Stain 2 1+ Cells	0
		% Stain 2 2+ Cells	0		% Stain 2 2+ Cells	0		% Stain 2 2+ Cells	0		% Stain 2 2+ Cells	0		% Stain 2 2+ Cells	0		% Stain 2 2+ Cells	0		% Stain 2 2+ Cells	0		% Stain 2 2+ Cells	0
		% Stain 2 3+ Cells	0		% Stain 2 3+ Cells	0		% Stain 2 3+ Cells	0		% Stain 2 3+ Cells	0		% Stain 2 3+ Cells	0		% Stain 2 3+ Cells	0		% Stain 2 3+ Cells	0		% Stain 2 3+ Cells	0
		Stain 2 H-Score	0		Stain 2 H-Score	0		Stain 2 H-Score	0		Stain 2 H-Score	0		Stain 2 H-Score	0		Stain 2 H-Score	0		Stain 2 H-Score	0		Stain 2 H-Score	0
		% Dual Positive Cells	0		% Dual Positive Cells	0		% Dual Positive Cells	0		% Dual Positive Cells	0		% Dual Positive Cells	0		% Dual Positive Cells	0		% Dual Positive Cells	0		% Dual Positive Cells	0
		% Dual Negative Cells	50.7641		% Dual Negative Cells	52.8635		% Dual Negative Cells	62.4196		% Dual Negative Cells	44.5537		% Dual Negative Cells	48.7713		% Dual Negative Cells	61.8538		% Dual Negative Cells	58.5233		% Dual Negative Cells	41.8726
		Avg Stain 1 Nuclear OD	0.228254		Avg Stain 1 Nuclear OD	0.216445		Avg Stain 1 Nuclear OD	0.186601		Avg Stain 1 Nuclear OD	0.261474		Avg Stain 1 Nuclear OD	0.220947		Avg Stain 1 Nuclear OD	0.18918		Avg Stain 1 Nuclear OD	0.2013		Avg Stain 1 Nuclear OD	0.268301
		Avg Stain 2 Nuclear OD	0.0495767		Avg Stain 2 Nuclear OD	0.0471782		Avg Stain 2 Nuclear OD	0.0449552		Avg Stain 2 Nuclear OD	0.0507406		Avg Stain 2 Nuclear OD	0.0440853		Avg Stain 2 Nuclear OD	0.0439354		Avg Stain 2 Nuclear OD	0.0443045		Avg Stain 2 Nuclear OD	0.0498629
		Avg Stain 1 Cytoplasmic OD	0.0699545		Avg Stain 1 Cytoplasmic OD	0.0676569		Avg Stain 1 Cytoplasmic OD	0.0580091		Avg Stain 1 Cytoplasmic OD	0.0732275		Avg Stain 1 Cytoplasmic OD	0.0658657		Avg Stain 1 Cytoplasmic OD	0.0609664		Avg Stain 1 Cytoplasmic OD	0.0686551		Avg Stain 1 Cytoplasmic OD	0.074811
		Avg Stain 2 Cytoplasmic OD	0.0323826		Avg Stain 2 Cytoplasmic OD	0.0320872		Avg Stain 2 Cytoplasmic OD	0.032054		Avg Stain 2 Cytoplasmic OD	0.0322617		Avg Stain 2 Cytoplasmic OD	0.0319912		Avg Stain 2 Cytoplasmic OD	0.032252		Avg Stain 2 Cytoplasmic OD	0.032223		Avg Stain 2 Cytoplasmic OD	0.0322739
		Avg Cell Area (µm²)	105.137		Avg Cell Area (µm²)	102.278		Avg Cell Area (µm²)	101.732		Avg Cell Area (µm²)	107.542		Avg Cell Area (µm²)	107.935		Avg Cell Area (µm²)	99.4247		Avg Cell Area (µm²)	93.9626		Avg Cell Area (µm²)	109.787
		Avg Cytoplasm Area (µm²)	80.4683		Avg Cytoplasm Area (µm²)	78.0988		Avg Cytoplasm Area (µm²)	78.9965		Avg Cytoplasm Area (µm²)	82.3237		Avg Cytoplasm Area (µm²)	84.5393		Avg Cytoplasm Area (µm²)	72.0855		Avg Cytoplasm Area (µm²)	69.1044		Avg Cytoplasm Area (µm²)	83.5011
		Avg Nucleus Area (µm²)	24.6691		Avg Nucleus Area (µm²)	24.1792		Avg Nucleus Area (µm²)	22.7359		Avg Nucleus Area (µm²)	25.2186		Avg Nucleus Area (µm²)	23.3955		Avg Nucleus Area (µm²)	27.3392		Avg Nucleus Area (µm²)	24.8582		Avg Nucleus Area (µm²)	26.2855
		Avg Nucleus Perimeter (µm)	9.72355		Avg Nucleus Perimeter (µm)	9.55296		Avg Nucleus Perimeter (µm)	9.00316		Avg Nucleus Perimeter (µm)	9.9571		Avg Nucleus Perimeter (µm)	9.23185		Avg Nucleus Perimeter (µm)	10.7549		Avg Nucleus Perimeter (µm)	9.82101		Avg Nucleus Perimeter (µm)	10.3325
		Avg Nucleus Roundness	0.7108		Avg Nucleus Roundness	0.707597		Avg Nucleus Roundness	0.700394		Avg Nucleus Roundness	0.701093		Avg Nucleus Roundness	0.709024		Avg Nucleus Roundness	0.683766		Avg Nucleus Roundness	0.691716		Avg Nucleus Roundness	0.702184
		Tissue Area (µm²)	1105190		Tissue Area (µm²)	1311390		Tissue Area (µm²)	779540		Tissue Area (µm²)	928904		Tissue Area (µm²)	910288		Tissue Area (µm²)	1034430		Tissue Area (µm²)	625223		Tissue Area (µm²)	1069350
		tumour: Total Cells	4515		tumour: Total Cells	5605		tumour: Total Cells	3265		tumour: Total Cells	3764		tumour: Total Cells	3459		tumour: Total Cells	5049		tumour: Total Cells	3115		tumour: Total Cells	4208
		tumour: Stain 1 Positive Cells	2223		tumour: Stain 1 Positive Cells	2642		tumour: Stain 1 Positive Cells	1227		tumour: Stain 1 Positive Cells	2087		tumour: Stain 1 Positive Cells	1772		tumour: Stain 1 Positive Cells	1926		tumour: Stain 1 Positive Cells	1292		tumour: Stain 1 Positive Cells	2446
		tumour: Stain 1 0+ Cells	2292		tumour: Stain 1 0+ Cells	2963		tumour: Stain 1 0+ Cells	2038		tumour: Stain 1 0+ Cells	1677		tumour: Stain 1 0+ Cells	1687		tumour: Stain 1 0+ Cells	3123		tumour: Stain 1 0+ Cells	1823		tumour: Stain 1 0+ Cells	1762
		tumour: Stain 1 1+ Cells	749		tumour: Stain 1 1+ Cells	915		tumour: Stain 1 1+ Cells	386		tumour: Stain 1 1+ Cells	607		tumour: Stain 1 1+ Cells	652		tumour: Stain 1 1+ Cells	570		tumour: Stain 1 1+ Cells	406		tumour: Stain 1 1+ Cells	783
		tumour: Stain 1 2+ Cells	854		tumour: Stain 1 2+ Cells	1027		tumour: Stain 1 2+ Cells	458		tumour: Stain 1 2+ Cells	854		tumour: Stain 1 2+ Cells	720		tumour: Stain 1 2+ Cells	778		tumour: Stain 1 2+ Cells	525		tumour: Stain 1 2+ Cells	957
		tumour: Stain 1 3+ Cells	620		tumour: Stain 1 3+ Cells	700		tumour: Stain 1 3+ Cells	383		tumour: Stain 1 3+ Cells	626		tumour: Stain 1 3+ Cells	400		tumour: Stain 1 3+ Cells	578		tumour: Stain 1 3+ Cells	361		tumour: Stain 1 3+ Cells	706
		tumour: Stain 2 Positive Cells	0		tumour: Stain 2 Positive Cells	0		tumour: Stain 2 Positive Cells	0		tumour: Stain 2 Positive Cells	0		tumour: Stain 2 Positive Cells	0		tumour: Stain 2 Positive Cells	0		tumour: Stain 2 Positive Cells	0		tumour: Stain 2 Positive Cells	0
		tumour: Stain 2 0+ Cells	4515		tumour: Stain 2 0+ Cells	5605		tumour: Stain 2 0+ Cells	3265		tumour: Stain 2 0+ Cells	3764		tumour: Stain 2 0+ Cells	3459		tumour: Stain 2 0+ Cells	5049		tumour: Stain 2 0+ Cells	3115		tumour: Stain 2 0+ Cells	4208
		tumour: Stain 2 1+ Cells	0		tumour: Stain 2 1+ Cells	0		tumour: Stain 2 1+ Cells	0		tumour: Stain 2 1+ Cells	0		tumour: Stain 2 1+ Cells	0		tumour: Stain 2 1+ Cells	0		tumour: Stain 2 1+ Cells	0		tumour: Stain 2 1+ Cells	0
		tumour: Stain 2 2+ Cells	0		tumour: Stain 2 2+ Cells	0		tumour: Stain 2 2+ Cells	0		tumour: Stain 2 2+ Cells	0		tumour: Stain 2 2+ Cells	0		tumour: Stain 2 2+ Cells	0		tumour: Stain 2 2+ Cells	0		tumour: Stain 2 2+ Cells	0
		tumour: Stain 2 3+ Cells	0		tumour: Stain 2 3+ Cells	0		tumour: Stain 2 3+ Cells	0		tumour: Stain 2 3+ Cells	0		tumour: Stain 2 3+ Cells	0		tumour: Stain 2 3+ Cells	0		tumour: Stain 2 3+ Cells	0		tumour: Stain 2 3+ Cells	0
		tumour: Dual Positive Cells	0		tumour: Dual Positive Cells	0		tumour: Dual Positive Cells	0		tumour: Dual Positive Cells	0		tumour: Dual Positive Cells	0		tumour: Dual Positive Cells	0		tumour: Dual Positive Cells	0		tumour: Dual Positive Cells	0
		tumour: Dual Negative Cells	2292		tumour: Dual Negative Cells	2963		tumour: Dual Negative Cells	2038		tumour: Dual Negative Cells	1677		tumour: Dual Negative Cells	1687		tumour: Dual Negative Cells	3123		tumour: Dual Negative Cells	1823		tumour: Dual Negative Cells	1762
		tumour: % Stain 1 Positive Cells	49.2359		tumour: % Stain 1 Positive Cells	47.1365		tumour: % Stain 1 Positive Cells	37.5804		tumour: % Stain 1 Positive Cells	55.4463		tumour: % Stain 1 Positive Cells	51.2287		tumour: % Stain 1 Positive Cells	38.1462		tumour: % Stain 1 Positive Cells	41.4767		tumour: % Stain 1 Positive Cells	58.1274
		tumour: % Stain 1 0+ Cells	50.7641		tumour: % Stain 1 0+ Cells	52.8635		tumour: % Stain 1 0+ Cells	62.4196		tumour: % Stain 1 0+ Cells	44.5537		tumour: % Stain 1 0+ Cells	48.7713		tumour: % Stain 1 0+ Cells	61.8538		tumour: % Stain 1 0+ Cells	58.5233		tumour: % Stain 1 0+ Cells	41.8726
		tumour: % Stain 1 1+ Cells	16.5891		tumour: % Stain 1 1+ Cells	16.3247		tumour: % Stain 1 1+ Cells	11.8224		tumour: % Stain 1 1+ Cells	16.1265		tumour: % Stain 1 1+ Cells	18.8494		tumour: % Stain 1 1+ Cells	11.2894		tumour: % Stain 1 1+ Cells	13.0337		tumour: % Stain 1 1+ Cells	18.6074
		tumour: % Stain 1 2+ Cells	18.9147		tumour: % Stain 1 2+ Cells	18.3229		tumour: % Stain 1 2+ Cells	14.0276		tumour: % Stain 1 2+ Cells	22.6886		tumour: % Stain 1 2+ Cells	20.8153		tumour: % Stain 1 2+ Cells	15.409		tumour: % Stain 1 2+ Cells	16.8539		tumour: % Stain 1 2+ Cells	22.7424
		tumour: % Stain 1 3+ Cells	13.732		tumour: % Stain 1 3+ Cells	12.4888		tumour: % Stain 1 3+ Cells	11.7305		tumour: % Stain 1 3+ Cells	16.6312		tumour: % Stain 1 3+ Cells	11.564		tumour: % Stain 1 3+ Cells	11.4478		tumour: % Stain 1 3+ Cells	11.5891		tumour: % Stain 1 3+ Cells	16.7776
		tumour: Stain 1 H-Score	95.6146		tumour: Stain 1 H-Score	90.4371		tumour: Stain 1 H-Score	75.0689		tumour: Stain 1 H-Score	111.397		tumour: Stain 1 H-Score	95.172		tumour: Stain 1 H-Score	76.4508		tumour: Stain 1 H-Score	81.5088		tumour: Stain 1 H-Score	114.425
		tumour: % Stain 2 Positive Cells	0		tumour: % Stain 2 Positive Cells	0		tumour: % Stain 2 Positive Cells	0		tumour: % Stain 2 Positive Cells	0		tumour: % Stain 2 Positive Cells	0		tumour: % Stain 2 Positive Cells	0		tumour: % Stain 2 Positive Cells	0		tumour: % Stain 2 Positive Cells	0
		tumour: % Stain 2 0+ Cells	100		tumour: % Stain 2 0+ Cells	100		tumour: % Stain 2 0+ Cells	100		tumour: % Stain 2 0+ Cells	100		tumour: % Stain 2 0+ Cells	100		tumour: % Stain 2 0+ Cells	100		tumour: % Stain 2 0+ Cells	100		tumour: % Stain 2 0+ Cells	100
		tumour: % Stain 2 1+ Cells	0		tumour: % Stain 2 1+ Cells	0		tumour: % Stain 2 1+ Cells	0		tumour: % Stain 2 1+ Cells	0		tumour: % Stain 2 1+ Cells	0		tumour: % Stain 2 1+ Cells	0		tumour: % Stain 2 1+ Cells	0		tumour: % Stain 2 1+ Cells	0
		tumour: % Stain 2 2+ Cells	0		tumour: % Stain 2 2+ Cells	0		tumour: % Stain 2 2+ Cells	0		tumour: % Stain 2 2+ Cells	0		tumour: % Stain 2 2+ Cells	0		tumour: % Stain 2 2+ Cells	0		tumour: % Stain 2 2+ Cells	0		tumour: % Stain 2 2+ Cells	0
		tumour: % Stain 2 3+ Cells	0		tumour: % Stain 2 3+ Cells	0		tumour: % Stain 2 3+ Cells	0		tumour: % Stain 2 3+ Cells	0		tumour: % Stain 2 3+ Cells	0		tumour: % Stain 2 3+ Cells	0		tumour: % Stain 2 3+ Cells	0		tumour: % Stain 2 3+ Cells	0
		tumour: Stain 2 H-Score	0		tumour: Stain 2 H-Score	0		tumour: Stain 2 H-Score	0		tumour: Stain 2 H-Score	0		tumour: Stain 2 H-Score	0		tumour: Stain 2 H-Score	0		tumour: Stain 2 H-Score	0		tumour: Stain 2 H-Score	0
		tumour: % Dual Positive Cells	0		tumour: % Dual Positive Cells	0		tumour: % Dual Positive Cells	0		tumour: % Dual Positive Cells	0		tumour: % Dual Positive Cells	0		tumour: % Dual Positive Cells	0		tumour: % Dual Positive Cells	0		tumour: % Dual Positive Cells	0
		tumour: % Dual Negative Cells	50.7641		tumour: % Dual Negative Cells	52.8635		tumour: % Dual Negative Cells	62.4196		tumour: % Dual Negative Cells	44.5537		tumour: % Dual Negative Cells	48.7713		tumour: % Dual Negative Cells	61.8538		tumour: % Dual Negative Cells	58.5233		tumour: % Dual Negative Cells	41.8726
		tumour: Avg Stain 1 Nuclear OD	0.228254		tumour: Avg Stain 1 Nuclear OD	0.216445		tumour: Avg Stain 1 Nuclear OD	0.186601		tumour: Avg Stain 1 Nuclear OD	0.261474		tumour: Avg Stain 1 Nuclear OD	0.220947		tumour: Avg Stain 1 Nuclear OD	0.18918		tumour: Avg Stain 1 Nuclear OD	0.2013		tumour: Avg Stain 1 Nuclear OD	0.268301
		tumour: Avg Stain 2 Nuclear OD	0.0495767		tumour: Avg Stain 2 Nuclear OD	0.0471782		tumour: Avg Stain 2 Nuclear OD	0.0449552		tumour: Avg Stain 2 Nuclear OD	0.0507406		tumour: Avg Stain 2 Nuclear OD	0.0440853		tumour: Avg Stain 2 Nuclear OD	0.0439354		tumour: Avg Stain 2 Nuclear OD	0.0443045		tumour: Avg Stain 2 Nuclear OD	0.0498629
		tumour: Avg Stain 1 Cytoplasmic OD	0.0699545		tumour: Avg Stain 1 Cytoplasmic OD	0.0676569		tumour: Avg Stain 1 Cytoplasmic OD	0.0580091		tumour: Avg Stain 1 Cytoplasmic OD	0.0732275		tumour: Avg Stain 1 Cytoplasmic OD	0.0658657		tumour: Avg Stain 1 Cytoplasmic OD	0.0609664		tumour: Avg Stain 1 Cytoplasmic OD	0.0686551		tumour: Avg Stain 1 Cytoplasmic OD	0.074811
		tumour: Avg Stain 2 Cytoplasmic OD	0.0323826		tumour: Avg Stain 2 Cytoplasmic OD	0.0320872		tumour: Avg Stain 2 Cytoplasmic OD	0.032054		tumour: Avg Stain 2 Cytoplasmic OD	0.0322617		tumour: Avg Stain 2 Cytoplasmic OD	0.0319912		tumour: Avg Stain 2 Cytoplasmic OD	0.032252		tumour: Avg Stain 2 Cytoplasmic OD	0.032223		tumour: Avg Stain 2 Cytoplasmic OD	0.0322739
		tumour: Avg Cell Area (µm²)	105.137		tumour: Avg Cell Area (µm²)	102.278		tumour: Avg Cell Area (µm²)	101.732		tumour: Avg Cell Area (µm²)	107.542		tumour: Avg Cell Area (µm²)	107.935		tumour: Avg Cell Area (µm²)	99.4247		tumour: Avg Cell Area (µm²)	93.9626		tumour: Avg Cell Area (µm²)	109.787
		tumour: Avg Cytoplasm Area (µm²)	80.4683		tumour: Avg Cytoplasm Area (µm²)	78.0988		tumour: Avg Cytoplasm Area (µm²)	78.9965		tumour: Avg Cytoplasm Area (µm²)	82.3237		tumour: Avg Cytoplasm Area (µm²)	84.5393		tumour: Avg Cytoplasm Area (µm²)	72.0855		tumour: Avg Cytoplasm Area (µm²)	69.1044		tumour: Avg Cytoplasm Area (µm²)	83.5011
		tumour: Avg Nucleus Area (µm²)	24.6691		tumour: Avg Nucleus Area (µm²)	24.1792		tumour: Avg Nucleus Area (µm²)	22.7359		tumour: Avg Nucleus Area (µm²)	25.2186		tumour: Avg Nucleus Area (µm²)	23.3955		tumour: Avg Nucleus Area (µm²)	27.3392		tumour: Avg Nucleus Area (µm²)	24.8582		tumour: Avg Nucleus Area (µm²)	26.2855
		tumour: Avg Nucleus Perimeter (µm)	9.72355		tumour: Avg Nucleus Perimeter (µm)	9.55296		tumour: Avg Nucleus Perimeter (µm)	9.00316		tumour: Avg Nucleus Perimeter (µm)	9.9571		tumour: Avg Nucleus Perimeter (µm)	9.23185		tumour: Avg Nucleus Perimeter (µm)	10.7549		tumour: Avg Nucleus Perimeter (µm)	9.82101		tumour: Avg Nucleus Perimeter (µm)	10.3325
		tumour: Avg Nucleus Roundness	0.7108		tumour: Avg Nucleus Roundness	0.707597		tumour: Avg Nucleus Roundness	0.700394		tumour: Avg Nucleus Roundness	0.701093		tumour: Avg Nucleus Roundness	0.709024		tumour: Avg Nucleus Roundness	0.683766		tumour: Avg Nucleus Roundness	0.691716		tumour: Avg Nucleus Roundness	0.702184
		tumour: Tissue Area (µm²)	1105190		tumour: Tissue Area (µm²)	1311390		tumour: Tissue Area (µm²)	779540		tumour: Tissue Area (µm²)	928904		tumour: Tissue Area (µm²)	910288		tumour: Tissue Area (µm²)	1034430		tumour: Tissue Area (µm²)	625223		tumour: Tissue Area (µm²)	1069350
		BSNA10.4d	HOM
		Name	Value		Name	Value		Name	Value		Name	Value		Name	Value		Name	Value		Name	Value		Name	Value
		Classified Area (mm²)	1.30066		Classified Area (mm²)	0.86381		Classified Area (mm²)	1.17496		Classified Area (mm²)	1.11533		Classified Area (mm²)	0.84236		Classified Area (mm²)	0.58288		Classified Area (mm²)	0.71287		Classified Area (mm²)	1.66784
		tumour Area (mm²)	1.30001		tumour Area (mm²)	0.86343		tumour Area (mm²)	1.17344		tumour Area (mm²)	1.11246		tumour Area (mm²)	0.84236		tumour Area (mm²)	0.58288		tumour Area (mm²)	0.71182		tumour Area (mm²)	1.6481
		empty Area (mm²)	0.00028		empty Area (mm²)	0		empty Area (mm²)	0		empty Area (mm²)	8e-05		empty Area (mm²)	0		empty Area (mm²)	0		empty Area (mm²)	0.00105		empty Area (mm²)	0.00058
		necrosis Area (mm²)	0.00037		necrosis Area (mm²)	0.00038		necrosis Area (mm²)	0.00021		necrosis Area (mm²)	0.00027		necrosis Area (mm²)	0		necrosis Area (mm²)	0		necrosis Area (mm²)	0		necrosis Area (mm²)	0.00227
		normal Area (mm²)	0		normal Area (mm²)	0		normal Area (mm²)	0.00131		normal Area (mm²)	0.00252		normal Area (mm²)	0		normal Area (mm²)	0		normal Area (mm²)	0		normal Area (mm²)	0.01689
		Total Cells	4894		Total Cells	3438		Total Cells	4217		Total Cells	3657		Total Cells	3610		Total Cells	2577		Total Cells	3108		Total Cells	6616
		Stain 1 Positive Cells	3735		Stain 1 Positive Cells	2713		Stain 1 Positive Cells	1758		Stain 1 Positive Cells	1540		Stain 1 Positive Cells	2703		Stain 1 Positive Cells	2247		Stain 1 Positive Cells	2515		Stain 1 Positive Cells	1924
		Stain 1 0+ Cells	1159		Stain 1 0+ Cells	725		Stain 1 0+ Cells	2459		Stain 1 0+ Cells	2117		Stain 1 0+ Cells	907		Stain 1 0+ Cells	330		Stain 1 0+ Cells	593		Stain 1 0+ Cells	4692
		Stain 1 1+ Cells	1209		Stain 1 1+ Cells	743		Stain 1 1+ Cells	647		Stain 1 1+ Cells	552		Stain 1 1+ Cells	669		Stain 1 1+ Cells	454		Stain 1 1+ Cells	549		Stain 1 1+ Cells	615
		Stain 1 2+ Cells	1415		Stain 1 2+ Cells	1188		Stain 1 2+ Cells	547		Stain 1 2+ Cells	492		Stain 1 2+ Cells	890		Stain 1 2+ Cells	868		Stain 1 2+ Cells	966		Stain 1 2+ Cells	665
		Stain 1 3+ Cells	1111		Stain 1 3+ Cells	782		Stain 1 3+ Cells	564		Stain 1 3+ Cells	496		Stain 1 3+ Cells	1144		Stain 1 3+ Cells	925		Stain 1 3+ Cells	1000		Stain 1 3+ Cells	644
		Stain 2 Positive Cells	0		Stain 2 Positive Cells	0		Stain 2 Positive Cells	0		Stain 2 Positive Cells	0		Stain 2 Positive Cells	0		Stain 2 Positive Cells	0		Stain 2 Positive Cells	0		Stain 2 Positive Cells	0
		Stain 2 0+ Cells	4894		Stain 2 0+ Cells	3438		Stain 2 0+ Cells	4217		Stain 2 0+ Cells	3657		Stain 2 0+ Cells	3610		Stain 2 0+ Cells	2577		Stain 2 0+ Cells	3108		Stain 2 0+ Cells	6616
		Stain 2 1+ Cells	0		Stain 2 1+ Cells	0		Stain 2 1+ Cells	0		Stain 2 1+ Cells	0		Stain 2 1+ Cells	0		Stain 2 1+ Cells	0		Stain 2 1+ Cells	0		Stain 2 1+ Cells	0
		Stain 2 2+ Cells	0		Stain 2 2+ Cells	0		Stain 2 2+ Cells	0		Stain 2 2+ Cells	0		Stain 2 2+ Cells	0		Stain 2 2+ Cells	0		Stain 2 2+ Cells	0		Stain 2 2+ Cells	0
		Stain 2 3+ Cells	0		Stain 2 3+ Cells	0		Stain 2 3+ Cells	0		Stain 2 3+ Cells	0		Stain 2 3+ Cells	0		Stain 2 3+ Cells	0		Stain 2 3+ Cells	0		Stain 2 3+ Cells	0
		Dual Positive Cells	0		Dual Positive Cells	0		Dual Positive Cells	0		Dual Positive Cells	0		Dual Positive Cells	0		Dual Positive Cells	0		Dual Positive Cells	0		Dual Positive Cells	0
		Dual Negative Cells	1159		Dual Negative Cells	725		Dual Negative Cells	2459		Dual Negative Cells	2117		Dual Negative Cells	907		Dual Negative Cells	330		Dual Negative Cells	593		Dual Negative Cells	4692
		% Stain 1 Positive Cells	76.3179		% Stain 1 Positive Cells	78.9122		% Stain 1 Positive Cells	41.6884		% Stain 1 Positive Cells	42.111		% Stain 1 Positive Cells	74.8753		% Stain 1 Positive Cells	87.1944		% Stain 1 Positive Cells	80.9202		% Stain 1 Positive Cells	29.081		63.8875
		% Stain 1 0+ Cells	23.6821		% Stain 1 0+ Cells	21.0878		% Stain 1 0+ Cells	58.3116		% Stain 1 0+ Cells	57.889		% Stain 1 0+ Cells	25.1247		% Stain 1 0+ Cells	12.8056		% Stain 1 0+ Cells	19.0798		% Stain 1 0+ Cells	70.919
		% Stain 1 1+ Cells	24.7037		% Stain 1 1+ Cells	21.6114		% Stain 1 1+ Cells	15.3427		% Stain 1 1+ Cells	15.0943		% Stain 1 1+ Cells	18.5319		% Stain 1 1+ Cells	17.6174		% Stain 1 1+ Cells	17.6641		% Stain 1 1+ Cells	9.29565
		% Stain 1 2+ Cells	28.913		% Stain 1 2+ Cells	34.555		% Stain 1 2+ Cells	12.9713		% Stain 1 2+ Cells	13.4537		% Stain 1 2+ Cells	24.6537		% Stain 1 2+ Cells	33.6826		% Stain 1 2+ Cells	31.0811		% Stain 1 2+ Cells	10.0514
		% Stain 1 3+ Cells	22.7013		% Stain 1 3+ Cells	22.7458		% Stain 1 3+ Cells	13.3744		% Stain 1 3+ Cells	13.563		% Stain 1 3+ Cells	31.6898		% Stain 1 3+ Cells	35.8945		% Stain 1 3+ Cells	32.175		% Stain 1 3+ Cells	9.73398
		Stain 1 H-Score	150.633		Stain 1 H-Score	158.959		Stain 1 H-Score	81.4086		Stain 1 H-Score	82.6907		Stain 1 H-Score	162.909		Stain 1 H-Score	192.666		Stain 1 H-Score	176.351		Stain 1 H-Score	58.6004
		% Stain 2 Positive Cells	0		% Stain 2 Positive Cells	0		% Stain 2 Positive Cells	0		% Stain 2 Positive Cells	0		% Stain 2 Positive Cells	0		% Stain 2 Positive Cells	0		% Stain 2 Positive Cells	0		% Stain 2 Positive Cells	0
		% Stain 2 0+ Cells	100		% Stain 2 0+ Cells	100		% Stain 2 0+ Cells	100		% Stain 2 0+ Cells	100		% Stain 2 0+ Cells	100		% Stain 2 0+ Cells	100		% Stain 2 0+ Cells	100		% Stain 2 0+ Cells	100
		% Stain 2 1+ Cells	0		% Stain 2 1+ Cells	0		% Stain 2 1+ Cells	0		% Stain 2 1+ Cells	0		% Stain 2 1+ Cells	0		% Stain 2 1+ Cells	0		% Stain 2 1+ Cells	0		% Stain 2 1+ Cells	0
		% Stain 2 2+ Cells	0		% Stain 2 2+ Cells	0		% Stain 2 2+ Cells	0		% Stain 2 2+ Cells	0		% Stain 2 2+ Cells	0		% Stain 2 2+ Cells	0		% Stain 2 2+ Cells	0		% Stain 2 2+ Cells	0
		% Stain 2 3+ Cells	0		% Stain 2 3+ Cells	0		% Stain 2 3+ Cells	0		% Stain 2 3+ Cells	0		% Stain 2 3+ Cells	0		% Stain 2 3+ Cells	0		% Stain 2 3+ Cells	0		% Stain 2 3+ Cells	0
		Stain 2 H-Score	0		Stain 2 H-Score	0		Stain 2 H-Score	0		Stain 2 H-Score	0		Stain 2 H-Score	0		Stain 2 H-Score	0		Stain 2 H-Score	0		Stain 2 H-Score	0
		% Dual Positive Cells	0		% Dual Positive Cells	0		% Dual Positive Cells	0		% Dual Positive Cells	0		% Dual Positive Cells	0		% Dual Positive Cells	0		% Dual Positive Cells	0		% Dual Positive Cells	0
		% Dual Negative Cells	23.6821		% Dual Negative Cells	21.0878		% Dual Negative Cells	58.3116		% Dual Negative Cells	57.889		% Dual Negative Cells	25.1247		% Dual Negative Cells	12.8056		% Dual Negative Cells	19.0798		% Dual Negative Cells	70.919
		Avg Stain 1 Nuclear OD	0.336281		Avg Stain 1 Nuclear OD	0.3505		Avg Stain 1 Nuclear OD	0.200056		Avg Stain 1 Nuclear OD	0.202259		Avg Stain 1 Nuclear OD	0.383017		Avg Stain 1 Nuclear OD	0.439871		Avg Stain 1 Nuclear OD	0.400503		Avg Stain 1 Nuclear OD	0.154248
		Avg Stain 2 Nuclear OD	0.0572067		Avg Stain 2 Nuclear OD	0.0546606		Avg Stain 2 Nuclear OD	0.0464339		Avg Stain 2 Nuclear OD	0.0454706		Avg Stain 2 Nuclear OD	0.0586691		Avg Stain 2 Nuclear OD	0.0631644		Avg Stain 2 Nuclear OD	0.0567859		Avg Stain 2 Nuclear OD	0.0443177
		Avg Stain 1 Cytoplasmic OD	0.087861		Avg Stain 1 Cytoplasmic OD	0.090826		Avg Stain 1 Cytoplasmic OD	0.0586731		Avg Stain 1 Cytoplasmic OD	0.0599776		Avg Stain 1 Cytoplasmic OD	0.0960642		Avg Stain 1 Cytoplasmic OD	0.114713		Avg Stain 1 Cytoplasmic OD	0.101837		Avg Stain 1 Cytoplasmic OD	0.0516217
		Avg Stain 2 Cytoplasmic OD	0.0328796		Avg Stain 2 Cytoplasmic OD	0.0327327		Avg Stain 2 Cytoplasmic OD	0.032025		Avg Stain 2 Cytoplasmic OD	0.0320452		Avg Stain 2 Cytoplasmic OD	0.032244		Avg Stain 2 Cytoplasmic OD	0.0328685		Avg Stain 2 Cytoplasmic OD	0.0322829		Avg Stain 2 Cytoplasmic OD	0.0321726
		Avg Cell Area (µm²)	114.01		Avg Cell Area (µm²)	113.17		Avg Cell Area (µm²)	109.117		Avg Cell Area (µm²)	113.138		Avg Cell Area (µm²)	113.556		Avg Cell Area (µm²)	111.829		Avg Cell Area (µm²)	110.048		Avg Cell Area (µm²)	100.474
		Avg Cytoplasm Area (µm²)	84.4522		Avg Cytoplasm Area (µm²)	83.0374		Avg Cytoplasm Area (µm²)	85.3598		Avg Cytoplasm Area (µm²)	89.4041		Avg Cytoplasm Area (µm²)	81.916		Avg Cytoplasm Area (µm²)	76.4574		Avg Cytoplasm Area (µm²)	78.1678		Avg Cytoplasm Area (µm²)	77.9687
		Avg Nucleus Area (µm²)	29.5582		Avg Nucleus Area (µm²)	30.1322		Avg Nucleus Area (µm²)	23.7575		Avg Nucleus Area (µm²)	23.7339		Avg Nucleus Area (µm²)	31.6401		Avg Nucleus Area (µm²)	35.3717		Avg Nucleus Area (µm²)	31.8805		Avg Nucleus Area (µm²)	22.5054
		Avg Nucleus Perimeter (µm)	11.5693		Avg Nucleus Perimeter (µm)	11.7945		Avg Nucleus Perimeter (µm)	9.37713		Avg Nucleus Perimeter (µm)	9.33858		Avg Nucleus Perimeter (µm)	12.3388		Avg Nucleus Perimeter (µm)	13.6515		Avg Nucleus Perimeter (µm)	12.4148		Avg Nucleus Perimeter (µm)	8.89449
		Avg Nucleus Roundness	0.704934		Avg Nucleus Roundness	0.701082		Avg Nucleus Roundness	0.708425		Avg Nucleus Roundness	0.713788		Avg Nucleus Roundness	0.705865		Avg Nucleus Roundness	0.695466		Avg Nucleus Roundness	0.697807		Avg Nucleus Roundness	0.701458
		Tissue Area (µm²)	1252330		Tissue Area (µm²)	848554		Tissue Area (µm²)	1147760		Tissue Area (µm²)	1095620		Tissue Area (µm²)	840622		Tissue Area (µm²)	582420		Tissue Area (µm²)	710032		Tissue Area (µm²)	1545320
		tumour: Total Cells	4894		tumour: Total Cells	3438		tumour: Total Cells	4217		tumour: Total Cells	3657		tumour: Total Cells	3610		tumour: Total Cells	2577		tumour: Total Cells	3108		tumour: Total Cells	6616
		tumour: Stain 1 Positive Cells	3735		tumour: Stain 1 Positive Cells	2713		tumour: Stain 1 Positive Cells	1758		tumour: Stain 1 Positive Cells	1540		tumour: Stain 1 Positive Cells	2703		tumour: Stain 1 Positive Cells	2247		tumour: Stain 1 Positive Cells	2515		tumour: Stain 1 Positive Cells	1924
		tumour: Stain 1 0+ Cells	1159		tumour: Stain 1 0+ Cells	725		tumour: Stain 1 0+ Cells	2459		tumour: Stain 1 0+ Cells	2117		tumour: Stain 1 0+ Cells	907		tumour: Stain 1 0+ Cells	330		tumour: Stain 1 0+ Cells	593		tumour: Stain 1 0+ Cells	4692
		tumour: Stain 1 1+ Cells	1209		tumour: Stain 1 1+ Cells	743		tumour: Stain 1 1+ Cells	647		tumour: Stain 1 1+ Cells	552		tumour: Stain 1 1+ Cells	669		tumour: Stain 1 1+ Cells	454		tumour: Stain 1 1+ Cells	549		tumour: Stain 1 1+ Cells	615
		tumour: Stain 1 2+ Cells	1415		tumour: Stain 1 2+ Cells	1188		tumour: Stain 1 2+ Cells	547		tumour: Stain 1 2+ Cells	492		tumour: Stain 1 2+ Cells	890		tumour: Stain 1 2+ Cells	868		tumour: Stain 1 2+ Cells	966		tumour: Stain 1 2+ Cells	665
		tumour: Stain 1 3+ Cells	1111		tumour: Stain 1 3+ Cells	782		tumour: Stain 1 3+ Cells	564		tumour: Stain 1 3+ Cells	496		tumour: Stain 1 3+ Cells	1144		tumour: Stain 1 3+ Cells	925		tumour: Stain 1 3+ Cells	1000		tumour: Stain 1 3+ Cells	644
		tumour: Stain 2 Positive Cells	0		tumour: Stain 2 Positive Cells	0		tumour: Stain 2 Positive Cells	0		tumour: Stain 2 Positive Cells	0		tumour: Stain 2 Positive Cells	0		tumour: Stain 2 Positive Cells	0		tumour: Stain 2 Positive Cells	0		tumour: Stain 2 Positive Cells	0
		tumour: Stain 2 0+ Cells	4894		tumour: Stain 2 0+ Cells	3438		tumour: Stain 2 0+ Cells	4217		tumour: Stain 2 0+ Cells	3657		tumour: Stain 2 0+ Cells	3610		tumour: Stain 2 0+ Cells	2577		tumour: Stain 2 0+ Cells	3108		tumour: Stain 2 0+ Cells	6616
		tumour: Stain 2 1+ Cells	0		tumour: Stain 2 1+ Cells	0		tumour: Stain 2 1+ Cells	0		tumour: Stain 2 1+ Cells	0		tumour: Stain 2 1+ Cells	0		tumour: Stain 2 1+ Cells	0		tumour: Stain 2 1+ Cells	0		tumour: Stain 2 1+ Cells	0
		tumour: Stain 2 2+ Cells	0		tumour: Stain 2 2+ Cells	0		tumour: Stain 2 2+ Cells	0		tumour: Stain 2 2+ Cells	0		tumour: Stain 2 2+ Cells	0		tumour: Stain 2 2+ Cells	0		tumour: Stain 2 2+ Cells	0		tumour: Stain 2 2+ Cells	0
		tumour: Stain 2 3+ Cells	0		tumour: Stain 2 3+ Cells	0		tumour: Stain 2 3+ Cells	0		tumour: Stain 2 3+ Cells	0		tumour: Stain 2 3+ Cells	0		tumour: Stain 2 3+ Cells	0		tumour: Stain 2 3+ Cells	0		tumour: Stain 2 3+ Cells	0
		tumour: Dual Positive Cells	0		tumour: Dual Positive Cells	0		tumour: Dual Positive Cells	0		tumour: Dual Positive Cells	0		tumour: Dual Positive Cells	0		tumour: Dual Positive Cells	0		tumour: Dual Positive Cells	0		tumour: Dual Positive Cells	0
		tumour: Dual Negative Cells	1159		tumour: Dual Negative Cells	725		tumour: Dual Negative Cells	2459		tumour: Dual Negative Cells	2117		tumour: Dual Negative Cells	907		tumour: Dual Negative Cells	330		tumour: Dual Negative Cells	593		tumour: Dual Negative Cells	4692
		tumour: % Stain 1 Positive Cells	76.3179		tumour: % Stain 1 Positive Cells	78.9122		tumour: % Stain 1 Positive Cells	41.6884		tumour: % Stain 1 Positive Cells	42.111		tumour: % Stain 1 Positive Cells	74.8753		tumour: % Stain 1 Positive Cells	87.1944		tumour: % Stain 1 Positive Cells	80.9202		tumour: % Stain 1 Positive Cells	29.081
		tumour: % Stain 1 0+ Cells	23.6821		tumour: % Stain 1 0+ Cells	21.0878		tumour: % Stain 1 0+ Cells	58.3116		tumour: % Stain 1 0+ Cells	57.889		tumour: % Stain 1 0+ Cells	25.1247		tumour: % Stain 1 0+ Cells	12.8056		tumour: % Stain 1 0+ Cells	19.0798		tumour: % Stain 1 0+ Cells	70.919
		tumour: % Stain 1 1+ Cells	24.7037		tumour: % Stain 1 1+ Cells	21.6114		tumour: % Stain 1 1+ Cells	15.3427		tumour: % Stain 1 1+ Cells	15.0943		tumour: % Stain 1 1+ Cells	18.5319		tumour: % Stain 1 1+ Cells	17.6174		tumour: % Stain 1 1+ Cells	17.6641		tumour: % Stain 1 1+ Cells	9.29565
		tumour: % Stain 1 2+ Cells	28.913		tumour: % Stain 1 2+ Cells	34.555		tumour: % Stain 1 2+ Cells	12.9713		tumour: % Stain 1 2+ Cells	13.4537		tumour: % Stain 1 2+ Cells	24.6537		tumour: % Stain 1 2+ Cells	33.6826		tumour: % Stain 1 2+ Cells	31.0811		tumour: % Stain 1 2+ Cells	10.0514
		tumour: % Stain 1 3+ Cells	22.7013		tumour: % Stain 1 3+ Cells	22.7458		tumour: % Stain 1 3+ Cells	13.3744		tumour: % Stain 1 3+ Cells	13.563		tumour: % Stain 1 3+ Cells	31.6898		tumour: % Stain 1 3+ Cells	35.8945		tumour: % Stain 1 3+ Cells	32.175		tumour: % Stain 1 3+ Cells	9.73398
		tumour: Stain 1 H-Score	150.633		tumour: Stain 1 H-Score	158.959		tumour: Stain 1 H-Score	81.4086		tumour: Stain 1 H-Score	82.6907		tumour: Stain 1 H-Score	162.909		tumour: Stain 1 H-Score	192.666		tumour: Stain 1 H-Score	176.351		tumour: Stain 1 H-Score	58.6004
		tumour: % Stain 2 Positive Cells	0		tumour: % Stain 2 Positive Cells	0		tumour: % Stain 2 Positive Cells	0		tumour: % Stain 2 Positive Cells	0		tumour: % Stain 2 Positive Cells	0		tumour: % Stain 2 Positive Cells	0		tumour: % Stain 2 Positive Cells	0		tumour: % Stain 2 Positive Cells	0
		tumour: % Stain 2 0+ Cells	100		tumour: % Stain 2 0+ Cells	100		tumour: % Stain 2 0+ Cells	100		tumour: % Stain 2 0+ Cells	100		tumour: % Stain 2 0+ Cells	100		tumour: % Stain 2 0+ Cells	100		tumour: % Stain 2 0+ Cells	100		tumour: % Stain 2 0+ Cells	100
		tumour: % Stain 2 1+ Cells	0		tumour: % Stain 2 1+ Cells	0		tumour: % Stain 2 1+ Cells	0		tumour: % Stain 2 1+ Cells	0		tumour: % Stain 2 1+ Cells	0		tumour: % Stain 2 1+ Cells	0		tumour: % Stain 2 1+ Cells	0		tumour: % Stain 2 1+ Cells	0
		tumour: % Stain 2 2+ Cells	0		tumour: % Stain 2 2+ Cells	0		tumour: % Stain 2 2+ Cells	0		tumour: % Stain 2 2+ Cells	0		tumour: % Stain 2 2+ Cells	0		tumour: % Stain 2 2+ Cells	0		tumour: % Stain 2 2+ Cells	0		tumour: % Stain 2 2+ Cells	0
		tumour: % Stain 2 3+ Cells	0		tumour: % Stain 2 3+ Cells	0		tumour: % Stain 2 3+ Cells	0		tumour: % Stain 2 3+ Cells	0		tumour: % Stain 2 3+ Cells	0		tumour: % Stain 2 3+ Cells	0		tumour: % Stain 2 3+ Cells	0		tumour: % Stain 2 3+ Cells	0
		tumour: Stain 2 H-Score	0		tumour: Stain 2 H-Score	0		tumour: Stain 2 H-Score	0		tumour: Stain 2 H-Score	0		tumour: Stain 2 H-Score	0		tumour: Stain 2 H-Score	0		tumour: Stain 2 H-Score	0		tumour: Stain 2 H-Score	0
		tumour: % Dual Positive Cells	0		tumour: % Dual Positive Cells	0		tumour: % Dual Positive Cells	0		tumour: % Dual Positive Cells	0		tumour: % Dual Positive Cells	0		tumour: % Dual Positive Cells	0		tumour: % Dual Positive Cells	0		tumour: % Dual Positive Cells	0
		tumour: % Dual Negative Cells	23.6821		tumour: % Dual Negative Cells	21.0878		tumour: % Dual Negative Cells	58.3116		tumour: % Dual Negative Cells	57.889		tumour: % Dual Negative Cells	25.1247		tumour: % Dual Negative Cells	12.8056		tumour: % Dual Negative Cells	19.0798		tumour: % Dual Negative Cells	70.919
		tumour: Avg Stain 1 Nuclear OD	0.336281		tumour: Avg Stain 1 Nuclear OD	0.3505		tumour: Avg Stain 1 Nuclear OD	0.200056		tumour: Avg Stain 1 Nuclear OD	0.202259		tumour: Avg Stain 1 Nuclear OD	0.383017		tumour: Avg Stain 1 Nuclear OD	0.439871		tumour: Avg Stain 1 Nuclear OD	0.400503		tumour: Avg Stain 1 Nuclear OD	0.154248
		tumour: Avg Stain 2 Nuclear OD	0.0572067		tumour: Avg Stain 2 Nuclear OD	0.0546606		tumour: Avg Stain 2 Nuclear OD	0.0464339		tumour: Avg Stain 2 Nuclear OD	0.0454706		tumour: Avg Stain 2 Nuclear OD	0.0586691		tumour: Avg Stain 2 Nuclear OD	0.0631644		tumour: Avg Stain 2 Nuclear OD	0.0567859		tumour: Avg Stain 2 Nuclear OD	0.0443177
		tumour: Avg Stain 1 Cytoplasmic OD	0.087861		tumour: Avg Stain 1 Cytoplasmic OD	0.090826		tumour: Avg Stain 1 Cytoplasmic OD	0.0586731		tumour: Avg Stain 1 Cytoplasmic OD	0.0599776		tumour: Avg Stain 1 Cytoplasmic OD	0.0960642		tumour: Avg Stain 1 Cytoplasmic OD	0.114713		tumour: Avg Stain 1 Cytoplasmic OD	0.101837		tumour: Avg Stain 1 Cytoplasmic OD	0.0516217
		tumour: Avg Stain 2 Cytoplasmic OD	0.0328796		tumour: Avg Stain 2 Cytoplasmic OD	0.0327327		tumour: Avg Stain 2 Cytoplasmic OD	0.032025		tumour: Avg Stain 2 Cytoplasmic OD	0.0320452		tumour: Avg Stain 2 Cytoplasmic OD	0.032244		tumour: Avg Stain 2 Cytoplasmic OD	0.0328685		tumour: Avg Stain 2 Cytoplasmic OD	0.0322829		tumour: Avg Stain 2 Cytoplasmic OD	0.0321726
		tumour: Avg Cell Area (µm²)	114.01		tumour: Avg Cell Area (µm²)	113.17		tumour: Avg Cell Area (µm²)	109.117		tumour: Avg Cell Area (µm²)	113.138		tumour: Avg Cell Area (µm²)	113.556		tumour: Avg Cell Area (µm²)	111.829		tumour: Avg Cell Area (µm²)	110.048		tumour: Avg Cell Area (µm²)	100.474
		tumour: Avg Cytoplasm Area (µm²)	84.4522		tumour: Avg Cytoplasm Area (µm²)	83.0374		tumour: Avg Cytoplasm Area (µm²)	85.3598		tumour: Avg Cytoplasm Area (µm²)	89.4041		tumour: Avg Cytoplasm Area (µm²)	81.916		tumour: Avg Cytoplasm Area (µm²)	76.4574		tumour: Avg Cytoplasm Area (µm²)	78.1678		tumour: Avg Cytoplasm Area (µm²)	77.9687
		tumour: Avg Nucleus Area (µm²)	29.5582		tumour: Avg Nucleus Area (µm²)	30.1322		tumour: Avg Nucleus Area (µm²)	23.7575		tumour: Avg Nucleus Area (µm²)	23.7339		tumour: Avg Nucleus Area (µm²)	31.6401		tumour: Avg Nucleus Area (µm²)	35.3717		tumour: Avg Nucleus Area (µm²)	31.8805		tumour: Avg Nucleus Area (µm²)	22.5054
		tumour: Avg Nucleus Perimeter (µm)	11.5693		tumour: Avg Nucleus Perimeter (µm)	11.7945		tumour: Avg Nucleus Perimeter (µm)	9.37713		tumour: Avg Nucleus Perimeter (µm)	9.33858		tumour: Avg Nucleus Perimeter (µm)	12.3388		tumour: Avg Nucleus Perimeter (µm)	13.6515		tumour: Avg Nucleus Perimeter (µm)	12.4148		tumour: Avg Nucleus Perimeter (µm)	8.89449
		tumour: Avg Nucleus Roundness	0.704934		tumour: Avg Nucleus Roundness	0.701082		tumour: Avg Nucleus Roundness	0.708425		tumour: Avg Nucleus Roundness	0.713788		tumour: Avg Nucleus Roundness	0.705865		tumour: Avg Nucleus Roundness	0.695466		tumour: Avg Nucleus Roundness	0.697807		tumour: Avg Nucleus Roundness	0.701458
		tumour: Tissue Area (µm²)	1252330		tumour: Tissue Area (µm²)	848554		tumour: Tissue Area (µm²)	1147760		tumour: Tissue Area (µm²)	1095620		tumour: Tissue Area (µm²)	840622		tumour: Tissue Area (µm²)	582420		tumour: Tissue Area (µm²)	710032		tumour: Tissue Area (µm²)	1545320
		BSNA8.2c	HOM
		Name	Value		Name	Value		Name	Value		Name	Value		Name	Value		Name	Value		Name	Value		Name	Value
		Classified Area (mm²)	1.24432		Classified Area (mm²)	1.19516		Classified Area (mm²)	2.09752		Classified Area (mm²)	1.84649		Classified Area (mm²)	1.6521		Classified Area (mm²)	1.57115		Classified Area (mm²)	1.97964		Classified Area (mm²)	1.69826
		tumour Area (mm²)	1.1393		tumour Area (mm²)	1.18146		tumour Area (mm²)	1.65127		tumour Area (mm²)	1.78621		tumour Area (mm²)	1.59556		tumour Area (mm²)	1.0008		tumour Area (mm²)	1.71988		tumour Area (mm²)	1.66919
		empty Area (mm²)	0.0004		empty Area (mm²)	0.0001		empty Area (mm²)	2e-05		empty Area (mm²)	0.00059		empty Area (mm²)	0.00282		empty Area (mm²)	0.00079		empty Area (mm²)	0		empty Area (mm²)	0.0027
		necrosis Area (mm²)	0.04274		necrosis Area (mm²)	0.00024		necrosis Area (mm²)	0		necrosis Area (mm²)	0.00313		necrosis Area (mm²)	0.00028		necrosis Area (mm²)	0.00414		necrosis Area (mm²)	0.00018		necrosis Area (mm²)	0.00091
		normal Area (mm²)	0.06188		normal Area (mm²)	0.01336		normal Area (mm²)	0.44623		normal Area (mm²)	0.05656		normal Area (mm²)	0.05346		normal Area (mm²)	0.56542		normal Area (mm²)	0.25958		normal Area (mm²)	0.02547
		Total Cells	3396		Total Cells	4293		Total Cells	5803		Total Cells	7072		Total Cells	6349		Total Cells	3566		Total Cells	6729		Total Cells	6487
		Stain 1 Positive Cells	426		Stain 1 Positive Cells	2082		Stain 1 Positive Cells	1848		Stain 1 Positive Cells	1803		Stain 1 Positive Cells	2857		Stain 1 Positive Cells	287		Stain 1 Positive Cells	1482		Stain 1 Positive Cells	2140
		Stain 1 0+ Cells	2970		Stain 1 0+ Cells	2211		Stain 1 0+ Cells	3955		Stain 1 0+ Cells	5269		Stain 1 0+ Cells	3492		Stain 1 0+ Cells	3279		Stain 1 0+ Cells	5247		Stain 1 0+ Cells	4347
		Stain 1 1+ Cells	190		Stain 1 1+ Cells	606		Stain 1 1+ Cells	691		Stain 1 1+ Cells	563		Stain 1 1+ Cells	784		Stain 1 1+ Cells	108		Stain 1 1+ Cells	525		Stain 1 1+ Cells	681
		Stain 1 2+ Cells	162		Stain 1 2+ Cells	657		Stain 1 2+ Cells	616		Stain 1 2+ Cells	701		Stain 1 2+ Cells	986		Stain 1 2+ Cells	89		Stain 1 2+ Cells	520		Stain 1 2+ Cells	745
		Stain 1 3+ Cells	74		Stain 1 3+ Cells	819		Stain 1 3+ Cells	541		Stain 1 3+ Cells	539		Stain 1 3+ Cells	1087		Stain 1 3+ Cells	90		Stain 1 3+ Cells	437		Stain 1 3+ Cells	714
		Stain 2 Positive Cells	0		Stain 2 Positive Cells	0		Stain 2 Positive Cells	0		Stain 2 Positive Cells	0		Stain 2 Positive Cells	0		Stain 2 Positive Cells	0		Stain 2 Positive Cells	0		Stain 2 Positive Cells	0
		Stain 2 0+ Cells	3396		Stain 2 0+ Cells	4293		Stain 2 0+ Cells	5803		Stain 2 0+ Cells	7072		Stain 2 0+ Cells	6349		Stain 2 0+ Cells	3566		Stain 2 0+ Cells	6729		Stain 2 0+ Cells	6487
		Stain 2 1+ Cells	0		Stain 2 1+ Cells	0		Stain 2 1+ Cells	0		Stain 2 1+ Cells	0		Stain 2 1+ Cells	0		Stain 2 1+ Cells	0		Stain 2 1+ Cells	0		Stain 2 1+ Cells	0
		Stain 2 2+ Cells	0		Stain 2 2+ Cells	0		Stain 2 2+ Cells	0		Stain 2 2+ Cells	0		Stain 2 2+ Cells	0		Stain 2 2+ Cells	0		Stain 2 2+ Cells	0		Stain 2 2+ Cells	0
		Stain 2 3+ Cells	0		Stain 2 3+ Cells	0		Stain 2 3+ Cells	0		Stain 2 3+ Cells	0		Stain 2 3+ Cells	0		Stain 2 3+ Cells	0		Stain 2 3+ Cells	0		Stain 2 3+ Cells	0
		Dual Positive Cells	0		Dual Positive Cells	0		Dual Positive Cells	0		Dual Positive Cells	0		Dual Positive Cells	0		Dual Positive Cells	0		Dual Positive Cells	0		Dual Positive Cells	0
		Dual Negative Cells	2970		Dual Negative Cells	2211		Dual Negative Cells	3955		Dual Negative Cells	5269		Dual Negative Cells	3492		Dual Negative Cells	3279		Dual Negative Cells	5247		Dual Negative Cells	4347
		% Stain 1 Positive Cells	12.5442		% Stain 1 Positive Cells	48.4976		% Stain 1 Positive Cells	31.8456		% Stain 1 Positive Cells	25.4949		% Stain 1 Positive Cells	44.9992		% Stain 1 Positive Cells	8.04823		% Stain 1 Positive Cells	22.0241		% Stain 1 Positive Cells	32.9891		28.3054
		% Stain 1 0+ Cells	87.4558		% Stain 1 0+ Cells	51.5024		% Stain 1 0+ Cells	68.1544		% Stain 1 0+ Cells	74.5051		% Stain 1 0+ Cells	55.0008		% Stain 1 0+ Cells	91.9518		% Stain 1 0+ Cells	77.9759		% Stain 1 0+ Cells	67.0109
		% Stain 1 1+ Cells	5.59482		% Stain 1 1+ Cells	14.116		% Stain 1 1+ Cells	11.9076		% Stain 1 1+ Cells	7.96097		% Stain 1 1+ Cells	12.3484		% Stain 1 1+ Cells	3.0286		% Stain 1 1+ Cells	7.80205		% Stain 1 1+ Cells	10.4979
		% Stain 1 2+ Cells	4.77032		% Stain 1 2+ Cells	15.304		% Stain 1 2+ Cells	10.6152		% Stain 1 2+ Cells	9.91233		% Stain 1 2+ Cells	15.53		% Stain 1 2+ Cells	2.49579		% Stain 1 2+ Cells	7.72775		% Stain 1 2+ Cells	11.4845
		% Stain 1 3+ Cells	2.17903		% Stain 1 3+ Cells	19.0776		% Stain 1 3+ Cells	9.32276		% Stain 1 3+ Cells	7.62161		% Stain 1 3+ Cells	17.1208		% Stain 1 3+ Cells	2.52384		% Stain 1 3+ Cells	6.49428		% Stain 1 3+ Cells	11.0066
		Stain 1 H-Score	21.6726		Stain 1 H-Score	101.957		Stain 1 H-Score	61.1063		Stain 1 H-Score	50.6505		Stain 1 H-Score	94.7708		Stain 1 H-Score	15.5917		Stain 1 H-Score	42.7404		Stain 1 H-Score	66.4868
		% Stain 2 Positive Cells	0		% Stain 2 Positive Cells	0		% Stain 2 Positive Cells	0		% Stain 2 Positive Cells	0		% Stain 2 Positive Cells	0		% Stain 2 Positive Cells	0		% Stain 2 Positive Cells	0		% Stain 2 Positive Cells	0
		% Stain 2 0+ Cells	100		% Stain 2 0+ Cells	100		% Stain 2 0+ Cells	100		% Stain 2 0+ Cells	100		% Stain 2 0+ Cells	100		% Stain 2 0+ Cells	100		% Stain 2 0+ Cells	100		% Stain 2 0+ Cells	100
		% Stain 2 1+ Cells	0		% Stain 2 1+ Cells	0		% Stain 2 1+ Cells	0		% Stain 2 1+ Cells	0		% Stain 2 1+ Cells	0		% Stain 2 1+ Cells	0		% Stain 2 1+ Cells	0		% Stain 2 1+ Cells	0
		% Stain 2 2+ Cells	0		% Stain 2 2+ Cells	0		% Stain 2 2+ Cells	0		% Stain 2 2+ Cells	0		% Stain 2 2+ Cells	0		% Stain 2 2+ Cells	0		% Stain 2 2+ Cells	0		% Stain 2 2+ Cells	0
		% Stain 2 3+ Cells	0		% Stain 2 3+ Cells	0		% Stain 2 3+ Cells	0		% Stain 2 3+ Cells	0		% Stain 2 3+ Cells	0		% Stain 2 3+ Cells	0		% Stain 2 3+ Cells	0		% Stain 2 3+ Cells	0
		Stain 2 H-Score	0		Stain 2 H-Score	0		Stain 2 H-Score	0		Stain 2 H-Score	0		Stain 2 H-Score	0		Stain 2 H-Score	0		Stain 2 H-Score	0		Stain 2 H-Score	0
		% Dual Positive Cells	0		% Dual Positive Cells	0		% Dual Positive Cells	0		% Dual Positive Cells	0		% Dual Positive Cells	0		% Dual Positive Cells	0		% Dual Positive Cells	0		% Dual Positive Cells	0
		% Dual Negative Cells	87.4558		% Dual Negative Cells	51.5024		% Dual Negative Cells	68.1544		% Dual Negative Cells	74.5051		% Dual Negative Cells	55.0008		% Dual Negative Cells	91.9518		% Dual Negative Cells	77.9759		% Dual Negative Cells	67.0109
		Avg Stain 1 Nuclear OD	0.0705121		Avg Stain 1 Nuclear OD	0.255912		Avg Stain 1 Nuclear OD	0.156808		Avg Stain 1 Nuclear OD	0.133427		Avg Stain 1 Nuclear OD	0.23274		Avg Stain 1 Nuclear OD	0.0606314		Avg Stain 1 Nuclear OD	0.118202		Avg Stain 1 Nuclear OD	0.170901
		Avg Stain 2 Nuclear OD	0.0405925		Avg Stain 2 Nuclear OD	0.051372		Avg Stain 2 Nuclear OD	0.0428808		Avg Stain 2 Nuclear OD	0.0433205		Avg Stain 2 Nuclear OD	0.049069		Avg Stain 2 Nuclear OD	0.0387508		Avg Stain 2 Nuclear OD	0.0411276		Avg Stain 2 Nuclear OD	0.0439868
		Avg Stain 1 Cytoplasmic OD	0.0368191		Avg Stain 1 Cytoplasmic OD	0.0707336		Avg Stain 1 Cytoplasmic OD	0.0534665		Avg Stain 1 Cytoplasmic OD	0.0461089		Avg Stain 1 Cytoplasmic OD	0.0632482		Avg Stain 1 Cytoplasmic OD	0.0358824		Avg Stain 1 Cytoplasmic OD	0.0446553		Avg Stain 1 Cytoplasmic OD	0.0523015
		Avg Stain 2 Cytoplasmic OD	0.0325241		Avg Stain 2 Cytoplasmic OD	0.0324501		Avg Stain 2 Cytoplasmic OD	0.0320812		Avg Stain 2 Cytoplasmic OD	0.0322042		Avg Stain 2 Cytoplasmic OD	0.0322092		Avg Stain 2 Cytoplasmic OD	0.0319223		Avg Stain 2 Cytoplasmic OD	0.0319942		Avg Stain 2 Cytoplasmic OD	0.0318755
		Avg Cell Area (µm²)	102.535		Avg Cell Area (µm²)	119.425		Avg Cell Area (µm²)	123.49		Avg Cell Area (µm²)	98.5991		Avg Cell Area (µm²)	106.279		Avg Cell Area (µm²)	97.6383		Avg Cell Area (µm²)	100.716		Avg Cell Area (µm²)	101.136
		Avg Cytoplasm Area (µm²)	78.4451		Avg Cytoplasm Area (µm²)	85.7965		Avg Cytoplasm Area (µm²)	91.2356		Avg Cytoplasm Area (µm²)	77.1844		Avg Cytoplasm Area (µm²)	82.0307		Avg Cytoplasm Area (µm²)	77.123		Avg Cytoplasm Area (µm²)	80.3536		Avg Cytoplasm Area (µm²)	80.2632
		Avg Nucleus Area (µm²)	24.0902		Avg Nucleus Area (µm²)	33.6284		Avg Nucleus Area (µm²)	32.254		Avg Nucleus Area (µm²)	21.4147		Avg Nucleus Area (µm²)	24.2479		Avg Nucleus Area (µm²)	20.5153		Avg Nucleus Area (µm²)	20.3622		Avg Nucleus Area (µm²)	20.8731
		Avg Nucleus Perimeter (µm)	9.52753		Avg Nucleus Perimeter (µm)	12.7771		Avg Nucleus Perimeter (µm)	12.4658		Avg Nucleus Perimeter (µm)	8.47888		Avg Nucleus Perimeter (µm)	9.5593		Avg Nucleus Perimeter (µm)	8.14871		Avg Nucleus Perimeter (µm)	8.07274		Avg Nucleus Perimeter (µm)	8.26922
		Avg Nucleus Roundness	0.691536		Avg Nucleus Roundness	0.698241		Avg Nucleus Roundness	0.701933		Avg Nucleus Roundness	0.695899		Avg Nucleus Roundness	0.700294		Avg Nucleus Roundness	0.693035		Avg Nucleus Roundness	0.699209		Avg Nucleus Roundness	0.704776
		Tissue Area (µm²)	795865		Tissue Area (µm²)	1123050		Tissue Area (µm²)	1666140		Tissue Area (µm²)	1638350		Tissue Area (µm²)	1583060		Tissue Area (µm²)	917986		Tissue Area (µm²)	1698490		Tissue Area (µm²)	1608620
		tumour: Total Cells	3396		tumour: Total Cells	4293		tumour: Total Cells	5803		tumour: Total Cells	7072		tumour: Total Cells	6349		tumour: Total Cells	3566		tumour: Total Cells	6729		tumour: Total Cells	6487
		tumour: Stain 1 Positive Cells	426		tumour: Stain 1 Positive Cells	2082		tumour: Stain 1 Positive Cells	1848		tumour: Stain 1 Positive Cells	1803		tumour: Stain 1 Positive Cells	2857		tumour: Stain 1 Positive Cells	287		tumour: Stain 1 Positive Cells	1482		tumour: Stain 1 Positive Cells	2140
		tumour: Stain 1 0+ Cells	2970		tumour: Stain 1 0+ Cells	2211		tumour: Stain 1 0+ Cells	3955		tumour: Stain 1 0+ Cells	5269		tumour: Stain 1 0+ Cells	3492		tumour: Stain 1 0+ Cells	3279		tumour: Stain 1 0+ Cells	5247		tumour: Stain 1 0+ Cells	4347
		tumour: Stain 1 1+ Cells	190		tumour: Stain 1 1+ Cells	606		tumour: Stain 1 1+ Cells	691		tumour: Stain 1 1+ Cells	563		tumour: Stain 1 1+ Cells	784		tumour: Stain 1 1+ Cells	108		tumour: Stain 1 1+ Cells	525		tumour: Stain 1 1+ Cells	681
		tumour: Stain 1 2+ Cells	162		tumour: Stain 1 2+ Cells	657		tumour: Stain 1 2+ Cells	616		tumour: Stain 1 2+ Cells	701		tumour: Stain 1 2+ Cells	986		tumour: Stain 1 2+ Cells	89		tumour: Stain 1 2+ Cells	520		tumour: Stain 1 2+ Cells	745
		tumour: Stain 1 3+ Cells	74		tumour: Stain 1 3+ Cells	819		tumour: Stain 1 3+ Cells	541		tumour: Stain 1 3+ Cells	539		tumour: Stain 1 3+ Cells	1087		tumour: Stain 1 3+ Cells	90		tumour: Stain 1 3+ Cells	437		tumour: Stain 1 3+ Cells	714
		tumour: Stain 2 Positive Cells	0		tumour: Stain 2 Positive Cells	0		tumour: Stain 2 Positive Cells	0		tumour: Stain 2 Positive Cells	0		tumour: Stain 2 Positive Cells	0		tumour: Stain 2 Positive Cells	0		tumour: Stain 2 Positive Cells	0		tumour: Stain 2 Positive Cells	0
		tumour: Stain 2 0+ Cells	3396		tumour: Stain 2 0+ Cells	4293		tumour: Stain 2 0+ Cells	5803		tumour: Stain 2 0+ Cells	7072		tumour: Stain 2 0+ Cells	6349		tumour: Stain 2 0+ Cells	3566		tumour: Stain 2 0+ Cells	6729		tumour: Stain 2 0+ Cells	6487
		tumour: Stain 2 1+ Cells	0		tumour: Stain 2 1+ Cells	0		tumour: Stain 2 1+ Cells	0		tumour: Stain 2 1+ Cells	0		tumour: Stain 2 1+ Cells	0		tumour: Stain 2 1+ Cells	0		tumour: Stain 2 1+ Cells	0		tumour: Stain 2 1+ Cells	0
		tumour: Stain 2 2+ Cells	0		tumour: Stain 2 2+ Cells	0		tumour: Stain 2 2+ Cells	0		tumour: Stain 2 2+ Cells	0		tumour: Stain 2 2+ Cells	0		tumour: Stain 2 2+ Cells	0		tumour: Stain 2 2+ Cells	0		tumour: Stain 2 2+ Cells	0
		tumour: Stain 2 3+ Cells	0		tumour: Stain 2 3+ Cells	0		tumour: Stain 2 3+ Cells	0		tumour: Stain 2 3+ Cells	0		tumour: Stain 2 3+ Cells	0		tumour: Stain 2 3+ Cells	0		tumour: Stain 2 3+ Cells	0		tumour: Stain 2 3+ Cells	0
		tumour: Dual Positive Cells	0		tumour: Dual Positive Cells	0		tumour: Dual Positive Cells	0		tumour: Dual Positive Cells	0		tumour: Dual Positive Cells	0		tumour: Dual Positive Cells	0		tumour: Dual Positive Cells	0		tumour: Dual Positive Cells	0
		tumour: Dual Negative Cells	2970		tumour: Dual Negative Cells	2211		tumour: Dual Negative Cells	3955		tumour: Dual Negative Cells	5269		tumour: Dual Negative Cells	3492		tumour: Dual Negative Cells	3279		tumour: Dual Negative Cells	5247		tumour: Dual Negative Cells	4347
		tumour: % Stain 1 Positive Cells	12.5442		tumour: % Stain 1 Positive Cells	48.4976		tumour: % Stain 1 Positive Cells	31.8456		tumour: % Stain 1 Positive Cells	25.4949		tumour: % Stain 1 Positive Cells	44.9992		tumour: % Stain 1 Positive Cells	8.04823		tumour: % Stain 1 Positive Cells	22.0241		tumour: % Stain 1 Positive Cells	32.9891
		tumour: % Stain 1 0+ Cells	87.4558		tumour: % Stain 1 0+ Cells	51.5024		tumour: % Stain 1 0+ Cells	68.1544		tumour: % Stain 1 0+ Cells	74.5051		tumour: % Stain 1 0+ Cells	55.0008		tumour: % Stain 1 0+ Cells	91.9518		tumour: % Stain 1 0+ Cells	77.9759		tumour: % Stain 1 0+ Cells	67.0109
		tumour: % Stain 1 1+ Cells	5.59482		tumour: % Stain 1 1+ Cells	14.116		tumour: % Stain 1 1+ Cells	11.9076		tumour: % Stain 1 1+ Cells	7.96097		tumour: % Stain 1 1+ Cells	12.3484		tumour: % Stain 1 1+ Cells	3.0286		tumour: % Stain 1 1+ Cells	7.80205		tumour: % Stain 1 1+ Cells	10.4979
		tumour: % Stain 1 2+ Cells	4.77032		tumour: % Stain 1 2+ Cells	15.304		tumour: % Stain 1 2+ Cells	10.6152		tumour: % Stain 1 2+ Cells	9.91233		tumour: % Stain 1 2+ Cells	15.53		tumour: % Stain 1 2+ Cells	2.49579		tumour: % Stain 1 2+ Cells	7.72775		tumour: % Stain 1 2+ Cells	11.4845
		tumour: % Stain 1 3+ Cells	2.17903		tumour: % Stain 1 3+ Cells	19.0776		tumour: % Stain 1 3+ Cells	9.32276		tumour: % Stain 1 3+ Cells	7.62161		tumour: % Stain 1 3+ Cells	17.1208		tumour: % Stain 1 3+ Cells	2.52384		tumour: % Stain 1 3+ Cells	6.49428		tumour: % Stain 1 3+ Cells	11.0066
		tumour: Stain 1 H-Score	21.6726		tumour: Stain 1 H-Score	101.957		tumour: Stain 1 H-Score	61.1063		tumour: Stain 1 H-Score	50.6505		tumour: Stain 1 H-Score	94.7708		tumour: Stain 1 H-Score	15.5917		tumour: Stain 1 H-Score	42.7404		tumour: Stain 1 H-Score	66.4868
		tumour: % Stain 2 Positive Cells	0		tumour: % Stain 2 Positive Cells	0		tumour: % Stain 2 Positive Cells	0		tumour: % Stain 2 Positive Cells	0		tumour: % Stain 2 Positive Cells	0		tumour: % Stain 2 Positive Cells	0		tumour: % Stain 2 Positive Cells	0		tumour: % Stain 2 Positive Cells	0
		tumour: % Stain 2 0+ Cells	100		tumour: % Stain 2 0+ Cells	100		tumour: % Stain 2 0+ Cells	100		tumour: % Stain 2 0+ Cells	100		tumour: % Stain 2 0+ Cells	100		tumour: % Stain 2 0+ Cells	100		tumour: % Stain 2 0+ Cells	100		tumour: % Stain 2 0+ Cells	100
		tumour: % Stain 2 1+ Cells	0		tumour: % Stain 2 1+ Cells	0		tumour: % Stain 2 1+ Cells	0		tumour: % Stain 2 1+ Cells	0		tumour: % Stain 2 1+ Cells	0		tumour: % Stain 2 1+ Cells	0		tumour: % Stain 2 1+ Cells	0		tumour: % Stain 2 1+ Cells	0
		tumour: % Stain 2 2+ Cells	0		tumour: % Stain 2 2+ Cells	0		tumour: % Stain 2 2+ Cells	0		tumour: % Stain 2 2+ Cells	0		tumour: % Stain 2 2+ Cells	0		tumour: % Stain 2 2+ Cells	0		tumour: % Stain 2 2+ Cells	0		tumour: % Stain 2 2+ Cells	0
		tumour: % Stain 2 3+ Cells	0		tumour: % Stain 2 3+ Cells	0		tumour: % Stain 2 3+ Cells	0		tumour: % Stain 2 3+ Cells	0		tumour: % Stain 2 3+ Cells	0		tumour: % Stain 2 3+ Cells	0		tumour: % Stain 2 3+ Cells	0		tumour: % Stain 2 3+ Cells	0
		tumour: Stain 2 H-Score	0		tumour: Stain 2 H-Score	0		tumour: Stain 2 H-Score	0		tumour: Stain 2 H-Score	0		tumour: Stain 2 H-Score	0		tumour: Stain 2 H-Score	0		tumour: Stain 2 H-Score	0		tumour: Stain 2 H-Score	0
		tumour: % Dual Positive Cells	0		tumour: % Dual Positive Cells	0		tumour: % Dual Positive Cells	0		tumour: % Dual Positive Cells	0		tumour: % Dual Positive Cells	0		tumour: % Dual Positive Cells	0		tumour: % Dual Positive Cells	0		tumour: % Dual Positive Cells	0
		tumour: % Dual Negative Cells	87.4558		tumour: % Dual Negative Cells	51.5024		tumour: % Dual Negative Cells	68.1544		tumour: % Dual Negative Cells	74.5051		tumour: % Dual Negative Cells	55.0008		tumour: % Dual Negative Cells	91.9518		tumour: % Dual Negative Cells	77.9759		tumour: % Dual Negative Cells	67.0109
		tumour: Avg Stain 1 Nuclear OD	0.0705121		tumour: Avg Stain 1 Nuclear OD	0.255912		tumour: Avg Stain 1 Nuclear OD	0.156808		tumour: Avg Stain 1 Nuclear OD	0.133427		tumour: Avg Stain 1 Nuclear OD	0.23274		tumour: Avg Stain 1 Nuclear OD	0.0606314		tumour: Avg Stain 1 Nuclear OD	0.118202		tumour: Avg Stain 1 Nuclear OD	0.170901
		tumour: Avg Stain 2 Nuclear OD	0.0405925		tumour: Avg Stain 2 Nuclear OD	0.051372		tumour: Avg Stain 2 Nuclear OD	0.0428808		tumour: Avg Stain 2 Nuclear OD	0.0433205		tumour: Avg Stain 2 Nuclear OD	0.049069		tumour: Avg Stain 2 Nuclear OD	0.0387508		tumour: Avg Stain 2 Nuclear OD	0.0411276		tumour: Avg Stain 2 Nuclear OD	0.0439868
		tumour: Avg Stain 1 Cytoplasmic OD	0.0368191		tumour: Avg Stain 1 Cytoplasmic OD	0.0707336		tumour: Avg Stain 1 Cytoplasmic OD	0.0534665		tumour: Avg Stain 1 Cytoplasmic OD	0.0461089		tumour: Avg Stain 1 Cytoplasmic OD	0.0632482		tumour: Avg Stain 1 Cytoplasmic OD	0.0358824		tumour: Avg Stain 1 Cytoplasmic OD	0.0446553		tumour: Avg Stain 1 Cytoplasmic OD	0.0523015
		tumour: Avg Stain 2 Cytoplasmic OD	0.0325241		tumour: Avg Stain 2 Cytoplasmic OD	0.0324501		tumour: Avg Stain 2 Cytoplasmic OD	0.0320812		tumour: Avg Stain 2 Cytoplasmic OD	0.0322042		tumour: Avg Stain 2 Cytoplasmic OD	0.0322092		tumour: Avg Stain 2 Cytoplasmic OD	0.0319223		tumour: Avg Stain 2 Cytoplasmic OD	0.0319942		tumour: Avg Stain 2 Cytoplasmic OD	0.0318755
		tumour: Avg Cell Area (µm²)	102.535		tumour: Avg Cell Area (µm²)	119.425		tumour: Avg Cell Area (µm²)	123.49		tumour: Avg Cell Area (µm²)	98.5991		tumour: Avg Cell Area (µm²)	106.279		tumour: Avg Cell Area (µm²)	97.6383		tumour: Avg Cell Area (µm²)	100.716		tumour: Avg Cell Area (µm²)	101.136
		tumour: Avg Cytoplasm Area (µm²)	78.4451		tumour: Avg Cytoplasm Area (µm²)	85.7965		tumour: Avg Cytoplasm Area (µm²)	91.2356		tumour: Avg Cytoplasm Area (µm²)	77.1844		tumour: Avg Cytoplasm Area (µm²)	82.0307		tumour: Avg Cytoplasm Area (µm²)	77.123		tumour: Avg Cytoplasm Area (µm²)	80.3536		tumour: Avg Cytoplasm Area (µm²)	80.2632
		tumour: Avg Nucleus Area (µm²)	24.0902		tumour: Avg Nucleus Area (µm²)	33.6284		tumour: Avg Nucleus Area (µm²)	32.254		tumour: Avg Nucleus Area (µm²)	21.4147		tumour: Avg Nucleus Area (µm²)	24.2479		tumour: Avg Nucleus Area (µm²)	20.5153		tumour: Avg Nucleus Area (µm²)	20.3622		tumour: Avg Nucleus Area (µm²)	20.8731
		tumour: Avg Nucleus Perimeter (µm)	9.52753		tumour: Avg Nucleus Perimeter (µm)	12.7771		tumour: Avg Nucleus Perimeter (µm)	12.4658		tumour: Avg Nucleus Perimeter (µm)	8.47888		tumour: Avg Nucleus Perimeter (µm)	9.5593		tumour: Avg Nucleus Perimeter (µm)	8.14871		tumour: Avg Nucleus Perimeter (µm)	8.07274		tumour: Avg Nucleus Perimeter (µm)	8.26922
		tumour: Avg Nucleus Roundness	0.691536		tumour: Avg Nucleus Roundness	0.698241		tumour: Avg Nucleus Roundness	0.701933		tumour: Avg Nucleus Roundness	0.695899		tumour: Avg Nucleus Roundness	0.700294		tumour: Avg Nucleus Roundness	0.693035		tumour: Avg Nucleus Roundness	0.699209		tumour: Avg Nucleus Roundness	0.704776
		tumour: Tissue Area (µm²)	795865		tumour: Tissue Area (µm²)	1123050		tumour: Tissue Area (µm²)	1666140		tumour: Tissue Area (µm²)	1638350		tumour: Tissue Area (µm²)	1583060		tumour: Tissue Area (µm²)	917986		tumour: Tissue Area (µm²)	1698490		tumour: Tissue Area (µm²)	1608620
		BSNA19.1b	HOM
		Name	Value		Name	Value		Name	Value		Name	Value		Name	Value		Name	Value		Name	Value		Name	Value
		Classified Area (mm²)	1.96028		Classified Area (mm²)	2.00322		Classified Area (mm²)	1.42303		Classified Area (mm²)	1.6533		Classified Area (mm²)	1.15493		Classified Area (mm²)	1.85326		Classified Area (mm²)	1.50935		Classified Area (mm²)	1.19257
		tumour Area (mm²)	1.68335		tumour Area (mm²)	1.98208		tumour Area (mm²)	1.41073		tumour Area (mm²)	1.60248		tumour Area (mm²)	1.14299		tumour Area (mm²)	1.83408		tumour Area (mm²)	1.4818		tumour Area (mm²)	1.19134
		empty Area (mm²)	0		empty Area (mm²)	0.00184		empty Area (mm²)	0.01085		empty Area (mm²)	0.04248		empty Area (mm²)	0.01191		empty Area (mm²)	0.01873		empty Area (mm²)	0		empty Area (mm²)	0.00098
		necrosis Area (mm²)	1e-05		necrosis Area (mm²)	0.00117		necrosis Area (mm²)	0		necrosis Area (mm²)	0.00802		necrosis Area (mm²)	0		necrosis Area (mm²)	0.00044		necrosis Area (mm²)	0		necrosis Area (mm²)	8e-05
		normal Area (mm²)	0.27692		normal Area (mm²)	0.01813		normal Area (mm²)	0.00145		normal Area (mm²)	0.00033		normal Area (mm²)	3e-05		normal Area (mm²)	0		normal Area (mm²)	0.02755		normal Area (mm²)	0.00017
		Total Cells	7093		Total Cells	7021		Total Cells	5459		Total Cells	5807		Total Cells	4615		Total Cells	6388		Total Cells	5278		Total Cells	4800
		Stain 1 Positive Cells	1307		Stain 1 Positive Cells	3710		Stain 1 Positive Cells	2923		Stain 1 Positive Cells	3323		Stain 1 Positive Cells	3438		Stain 1 Positive Cells	3648		Stain 1 Positive Cells	1949		Stain 1 Positive Cells	2395
		Stain 1 0+ Cells	5786		Stain 1 0+ Cells	3311		Stain 1 0+ Cells	2536		Stain 1 0+ Cells	2484		Stain 1 0+ Cells	1177		Stain 1 0+ Cells	2740		Stain 1 0+ Cells	3329		Stain 1 0+ Cells	2405
		Stain 1 1+ Cells	416		Stain 1 1+ Cells	1009		Stain 1 1+ Cells	760		Stain 1 1+ Cells	817		Stain 1 1+ Cells	865		Stain 1 1+ Cells	891		Stain 1 1+ Cells	650		Stain 1 1+ Cells	625
		Stain 1 2+ Cells	435		Stain 1 2+ Cells	1297		Stain 1 2+ Cells	944		Stain 1 2+ Cells	1263		Stain 1 2+ Cells	1391		Stain 1 2+ Cells	1282		Stain 1 2+ Cells	627		Stain 1 2+ Cells	866
		Stain 1 3+ Cells	456		Stain 1 3+ Cells	1404		Stain 1 3+ Cells	1219		Stain 1 3+ Cells	1243		Stain 1 3+ Cells	1182		Stain 1 3+ Cells	1475		Stain 1 3+ Cells	672		Stain 1 3+ Cells	904
		Stain 2 Positive Cells	0		Stain 2 Positive Cells	0		Stain 2 Positive Cells	0		Stain 2 Positive Cells	0		Stain 2 Positive Cells	0		Stain 2 Positive Cells	0		Stain 2 Positive Cells	0		Stain 2 Positive Cells	0
		Stain 2 0+ Cells	7093		Stain 2 0+ Cells	7021		Stain 2 0+ Cells	5459		Stain 2 0+ Cells	5807		Stain 2 0+ Cells	4615		Stain 2 0+ Cells	6388		Stain 2 0+ Cells	5278		Stain 2 0+ Cells	4800
		Stain 2 1+ Cells	0		Stain 2 1+ Cells	0		Stain 2 1+ Cells	0		Stain 2 1+ Cells	0		Stain 2 1+ Cells	0		Stain 2 1+ Cells	0		Stain 2 1+ Cells	0		Stain 2 1+ Cells	0
		Stain 2 2+ Cells	0		Stain 2 2+ Cells	0		Stain 2 2+ Cells	0		Stain 2 2+ Cells	0		Stain 2 2+ Cells	0		Stain 2 2+ Cells	0		Stain 2 2+ Cells	0		Stain 2 2+ Cells	0
		Stain 2 3+ Cells	0		Stain 2 3+ Cells	0		Stain 2 3+ Cells	0		Stain 2 3+ Cells	0		Stain 2 3+ Cells	0		Stain 2 3+ Cells	0		Stain 2 3+ Cells	0		Stain 2 3+ Cells	0
		Dual Positive Cells	0		Dual Positive Cells	0		Dual Positive Cells	0		Dual Positive Cells	0		Dual Positive Cells	0		Dual Positive Cells	0		Dual Positive Cells	0		Dual Positive Cells	0
		Dual Negative Cells	5786		Dual Negative Cells	3311		Dual Negative Cells	2536		Dual Negative Cells	2484		Dual Negative Cells	1177		Dual Negative Cells	2740		Dual Negative Cells	3329		Dual Negative Cells	2405
		% Stain 1 Positive Cells	18.4266		% Stain 1 Positive Cells	52.8415		% Stain 1 Positive Cells	53.5446		% Stain 1 Positive Cells	57.224		% Stain 1 Positive Cells	74.4962		% Stain 1 Positive Cells	57.1071		% Stain 1 Positive Cells	36.9269		% Stain 1 Positive Cells	49.8958		50.0578
		% Stain 1 0+ Cells	81.5734		% Stain 1 0+ Cells	47.1585		% Stain 1 0+ Cells	46.4554		% Stain 1 0+ Cells	42.776		% Stain 1 0+ Cells	25.5038		% Stain 1 0+ Cells	42.8929		% Stain 1 0+ Cells	63.0731		% Stain 1 0+ Cells	50.1042
		% Stain 1 1+ Cells	5.86494		% Stain 1 1+ Cells	14.3712		% Stain 1 1+ Cells	13.922		% Stain 1 1+ Cells	14.0692		% Stain 1 1+ Cells	18.7432		% Stain 1 1+ Cells	13.948		% Stain 1 1+ Cells	12.3153		% Stain 1 1+ Cells	13.0208
		% Stain 1 2+ Cells	6.13281		% Stain 1 2+ Cells	18.4732		% Stain 1 2+ Cells	17.2925		% Stain 1 2+ Cells	21.7496		% Stain 1 2+ Cells	30.1408		% Stain 1 2+ Cells	20.0689		% Stain 1 2+ Cells	11.8795		% Stain 1 2+ Cells	18.0417
		% Stain 1 3+ Cells	6.42887		% Stain 1 3+ Cells	19.9972		% Stain 1 3+ Cells	22.3301		% Stain 1 3+ Cells	21.4052		% Stain 1 3+ Cells	25.6121		% Stain 1 3+ Cells	23.0902		% Stain 1 3+ Cells	12.7321		% Stain 1 3+ Cells	18.8333
		Stain 1 H-Score	37.4172		Stain 1 H-Score	111.309		Stain 1 H-Score	115.497		Stain 1 H-Score	121.784		Stain 1 H-Score	155.861		Stain 1 H-Score	123.356		Stain 1 H-Score	74.2706		Stain 1 H-Score	105.604
		% Stain 2 Positive Cells	0		% Stain 2 Positive Cells	0		% Stain 2 Positive Cells	0		% Stain 2 Positive Cells	0		% Stain 2 Positive Cells	0		% Stain 2 Positive Cells	0		% Stain 2 Positive Cells	0		% Stain 2 Positive Cells	0
		% Stain 2 0+ Cells	100		% Stain 2 0+ Cells	100		% Stain 2 0+ Cells	100		% Stain 2 0+ Cells	100		% Stain 2 0+ Cells	100		% Stain 2 0+ Cells	100		% Stain 2 0+ Cells	100		% Stain 2 0+ Cells	100
		% Stain 2 1+ Cells	0		% Stain 2 1+ Cells	0		% Stain 2 1+ Cells	0		% Stain 2 1+ Cells	0		% Stain 2 1+ Cells	0		% Stain 2 1+ Cells	0		% Stain 2 1+ Cells	0		% Stain 2 1+ Cells	0
		% Stain 2 2+ Cells	0		% Stain 2 2+ Cells	0		% Stain 2 2+ Cells	0		% Stain 2 2+ Cells	0		% Stain 2 2+ Cells	0		% Stain 2 2+ Cells	0		% Stain 2 2+ Cells	0		% Stain 2 2+ Cells	0
		% Stain 2 3+ Cells	0		% Stain 2 3+ Cells	0		% Stain 2 3+ Cells	0		% Stain 2 3+ Cells	0		% Stain 2 3+ Cells	0		% Stain 2 3+ Cells	0		% Stain 2 3+ Cells	0		% Stain 2 3+ Cells	0
		Stain 2 H-Score	0		Stain 2 H-Score	0		Stain 2 H-Score	0		Stain 2 H-Score	0		Stain 2 H-Score	0		Stain 2 H-Score	0		Stain 2 H-Score	0		Stain 2 H-Score	0
		% Dual Positive Cells	0		% Dual Positive Cells	0		% Dual Positive Cells	0		% Dual Positive Cells	0		% Dual Positive Cells	0		% Dual Positive Cells	0		% Dual Positive Cells	0		% Dual Positive Cells	0
		% Dual Negative Cells	81.5734		% Dual Negative Cells	47.1585		% Dual Negative Cells	46.4554		% Dual Negative Cells	42.776		% Dual Negative Cells	25.5038		% Dual Negative Cells	42.8929		% Dual Negative Cells	63.0731		% Dual Negative Cells	50.1042
		Avg Stain 1 Nuclear OD	0.108952		Avg Stain 1 Nuclear OD	0.268132		Avg Stain 1 Nuclear OD	0.27965		Avg Stain 1 Nuclear OD	0.287649		Avg Stain 1 Nuclear OD	0.35577		Avg Stain 1 Nuclear OD	0.292095		Avg Stain 1 Nuclear OD	0.186352		Avg Stain 1 Nuclear OD	0.256214
		Avg Stain 2 Nuclear OD	0.0408027		Avg Stain 2 Nuclear OD	0.0515654		Avg Stain 2 Nuclear OD	0.0531563		Avg Stain 2 Nuclear OD	0.0520904		Avg Stain 2 Nuclear OD	0.0575571		Avg Stain 2 Nuclear OD	0.0532711		Avg Stain 2 Nuclear OD	0.0460885		Avg Stain 2 Nuclear OD	0.0500368
		Avg Stain 1 Cytoplasmic OD	0.0428675		Avg Stain 1 Cytoplasmic OD	0.0696166		Avg Stain 1 Cytoplasmic OD	0.07139		Avg Stain 1 Cytoplasmic OD	0.0711519		Avg Stain 1 Cytoplasmic OD	0.0857569		Avg Stain 1 Cytoplasmic OD	0.0727395		Avg Stain 1 Cytoplasmic OD	0.0563185		Avg Stain 1 Cytoplasmic OD	0.0670981
		Avg Stain 2 Cytoplasmic OD	0.0320828		Avg Stain 2 Cytoplasmic OD	0.0324324		Avg Stain 2 Cytoplasmic OD	0.0322847		Avg Stain 2 Cytoplasmic OD	0.0321997		Avg Stain 2 Cytoplasmic OD	0.0326165		Avg Stain 2 Cytoplasmic OD	0.0324448		Avg Stain 2 Cytoplasmic OD	0.0322786		Avg Stain 2 Cytoplasmic OD	0.0322616
		Avg Cell Area (µm²)	97.0436		Avg Cell Area (µm²)	111.052		Avg Cell Area (µm²)	107.683		Avg Cell Area (µm²)	106.747		Avg Cell Area (µm²)	107.314		Avg Cell Area (µm²)	107.469		Avg Cell Area (µm²)	111.718		Avg Cell Area (µm²)	105.153
		Avg Cytoplasm Area (µm²)	75.5558		Avg Cytoplasm Area (µm²)	82.973		Avg Cytoplasm Area (µm²)	81.2118		Avg Cytoplasm Area (µm²)	81.8249		Avg Cytoplasm Area (µm²)	80.0775		Avg Cytoplasm Area (µm²)	81.3298		Avg Cytoplasm Area (µm²)	86.0053		Avg Cytoplasm Area (µm²)	80.7415
		Avg Nucleus Area (µm²)	21.4878		Avg Nucleus Area (µm²)	28.0793		Avg Nucleus Area (µm²)	26.4712		Avg Nucleus Area (µm²)	24.9218		Avg Nucleus Area (µm²)	27.2362		Avg Nucleus Area (µm²)	26.1396		Avg Nucleus Area (µm²)	25.7132		Avg Nucleus Area (µm²)	24.4114
		Avg Nucleus Perimeter (µm)	8.51724		Avg Nucleus Perimeter (µm)	10.8241		Avg Nucleus Perimeter (µm)	10.4051		Avg Nucleus Perimeter (µm)	9.83609		Avg Nucleus Perimeter (µm)	10.7292		Avg Nucleus Perimeter (µm)	10.2939		Avg Nucleus Perimeter (µm)	10.0471		Avg Nucleus Perimeter (µm)	9.66022
		Avg Nucleus Roundness	0.692354		Avg Nucleus Roundness	0.702408		Avg Nucleus Roundness	0.699755		Avg Nucleus Roundness	0.700808		Avg Nucleus Roundness	0.698623		Avg Nucleus Roundness	0.703333		Avg Nucleus Roundness	0.704381		Avg Nucleus Roundness	0.700004
		Tissue Area (µm²)	1581060		Tissue Area (µm²)	1793360		Tissue Area (µm²)	1330160		Tissue Area (µm²)	1461250		Tissue Area (µm²)	1090440		Tissue Area (µm²)	1633420		Tissue Area (µm²)	1450490		Tissue Area (µm²)	1148390
		tumour: Total Cells	7093		tumour: Total Cells	7021		tumour: Total Cells	5459		tumour: Total Cells	5807		tumour: Total Cells	4615		tumour: Total Cells	6388		tumour: Total Cells	5278		tumour: Total Cells	4800
		tumour: Stain 1 Positive Cells	1307		tumour: Stain 1 Positive Cells	3710		tumour: Stain 1 Positive Cells	2923		tumour: Stain 1 Positive Cells	3323		tumour: Stain 1 Positive Cells	3438		tumour: Stain 1 Positive Cells	3648		tumour: Stain 1 Positive Cells	1949		tumour: Stain 1 Positive Cells	2395
		tumour: Stain 1 0+ Cells	5786		tumour: Stain 1 0+ Cells	3311		tumour: Stain 1 0+ Cells	2536		tumour: Stain 1 0+ Cells	2484		tumour: Stain 1 0+ Cells	1177		tumour: Stain 1 0+ Cells	2740		tumour: Stain 1 0+ Cells	3329		tumour: Stain 1 0+ Cells	2405
		tumour: Stain 1 1+ Cells	416		tumour: Stain 1 1+ Cells	1009		tumour: Stain 1 1+ Cells	760		tumour: Stain 1 1+ Cells	817		tumour: Stain 1 1+ Cells	865		tumour: Stain 1 1+ Cells	891		tumour: Stain 1 1+ Cells	650		tumour: Stain 1 1+ Cells	625
		tumour: Stain 1 2+ Cells	435		tumour: Stain 1 2+ Cells	1297		tumour: Stain 1 2+ Cells	944		tumour: Stain 1 2+ Cells	1263		tumour: Stain 1 2+ Cells	1391		tumour: Stain 1 2+ Cells	1282		tumour: Stain 1 2+ Cells	627		tumour: Stain 1 2+ Cells	866
		tumour: Stain 1 3+ Cells	456		tumour: Stain 1 3+ Cells	1404		tumour: Stain 1 3+ Cells	1219		tumour: Stain 1 3+ Cells	1243		tumour: Stain 1 3+ Cells	1182		tumour: Stain 1 3+ Cells	1475		tumour: Stain 1 3+ Cells	672		tumour: Stain 1 3+ Cells	904
		tumour: Stain 2 Positive Cells	0		tumour: Stain 2 Positive Cells	0		tumour: Stain 2 Positive Cells	0		tumour: Stain 2 Positive Cells	0		tumour: Stain 2 Positive Cells	0		tumour: Stain 2 Positive Cells	0		tumour: Stain 2 Positive Cells	0		tumour: Stain 2 Positive Cells	0
		tumour: Stain 2 0+ Cells	7093		tumour: Stain 2 0+ Cells	7021		tumour: Stain 2 0+ Cells	5459		tumour: Stain 2 0+ Cells	5807		tumour: Stain 2 0+ Cells	4615		tumour: Stain 2 0+ Cells	6388		tumour: Stain 2 0+ Cells	5278		tumour: Stain 2 0+ Cells	4800
		tumour: Stain 2 1+ Cells	0		tumour: Stain 2 1+ Cells	0		tumour: Stain 2 1+ Cells	0		tumour: Stain 2 1+ Cells	0		tumour: Stain 2 1+ Cells	0		tumour: Stain 2 1+ Cells	0		tumour: Stain 2 1+ Cells	0		tumour: Stain 2 1+ Cells	0
		tumour: Stain 2 2+ Cells	0		tumour: Stain 2 2+ Cells	0		tumour: Stain 2 2+ Cells	0		tumour: Stain 2 2+ Cells	0		tumour: Stain 2 2+ Cells	0		tumour: Stain 2 2+ Cells	0		tumour: Stain 2 2+ Cells	0		tumour: Stain 2 2+ Cells	0
		tumour: Stain 2 3+ Cells	0		tumour: Stain 2 3+ Cells	0		tumour: Stain 2 3+ Cells	0		tumour: Stain 2 3+ Cells	0		tumour: Stain 2 3+ Cells	0		tumour: Stain 2 3+ Cells	0		tumour: Stain 2 3+ Cells	0		tumour: Stain 2 3+ Cells	0
		tumour: Dual Positive Cells	0		tumour: Dual Positive Cells	0		tumour: Dual Positive Cells	0		tumour: Dual Positive Cells	0		tumour: Dual Positive Cells	0		tumour: Dual Positive Cells	0		tumour: Dual Positive Cells	0		tumour: Dual Positive Cells	0
		tumour: Dual Negative Cells	5786		tumour: Dual Negative Cells	3311		tumour: Dual Negative Cells	2536		tumour: Dual Negative Cells	2484		tumour: Dual Negative Cells	1177		tumour: Dual Negative Cells	2740		tumour: Dual Negative Cells	3329		tumour: Dual Negative Cells	2405
		tumour: % Stain 1 Positive Cells	18.4266		tumour: % Stain 1 Positive Cells	52.8415		tumour: % Stain 1 Positive Cells	53.5446		tumour: % Stain 1 Positive Cells	57.224		tumour: % Stain 1 Positive Cells	74.4962		tumour: % Stain 1 Positive Cells	57.1071		tumour: % Stain 1 Positive Cells	36.9269		tumour: % Stain 1 Positive Cells	49.8958
		tumour: % Stain 1 0+ Cells	81.5734		tumour: % Stain 1 0+ Cells	47.1585		tumour: % Stain 1 0+ Cells	46.4554		tumour: % Stain 1 0+ Cells	42.776		tumour: % Stain 1 0+ Cells	25.5038		tumour: % Stain 1 0+ Cells	42.8929		tumour: % Stain 1 0+ Cells	63.0731		tumour: % Stain 1 0+ Cells	50.1042
		tumour: % Stain 1 1+ Cells	5.86494		tumour: % Stain 1 1+ Cells	14.3712		tumour: % Stain 1 1+ Cells	13.922		tumour: % Stain 1 1+ Cells	14.0692		tumour: % Stain 1 1+ Cells	18.7432		tumour: % Stain 1 1+ Cells	13.948		tumour: % Stain 1 1+ Cells	12.3153		tumour: % Stain 1 1+ Cells	13.0208
		tumour: % Stain 1 2+ Cells	6.13281		tumour: % Stain 1 2+ Cells	18.4732		tumour: % Stain 1 2+ Cells	17.2925		tumour: % Stain 1 2+ Cells	21.7496		tumour: % Stain 1 2+ Cells	30.1408		tumour: % Stain 1 2+ Cells	20.0689		tumour: % Stain 1 2+ Cells	11.8795		tumour: % Stain 1 2+ Cells	18.0417
		tumour: % Stain 1 3+ Cells	6.42887		tumour: % Stain 1 3+ Cells	19.9972		tumour: % Stain 1 3+ Cells	22.3301		tumour: % Stain 1 3+ Cells	21.4052		tumour: % Stain 1 3+ Cells	25.6121		tumour: % Stain 1 3+ Cells	23.0902		tumour: % Stain 1 3+ Cells	12.7321		tumour: % Stain 1 3+ Cells	18.8333
		tumour: Stain 1 H-Score	37.4172		tumour: Stain 1 H-Score	111.309		tumour: Stain 1 H-Score	115.497		tumour: Stain 1 H-Score	121.784		tumour: Stain 1 H-Score	155.861		tumour: Stain 1 H-Score	123.356		tumour: Stain 1 H-Score	74.2706		tumour: Stain 1 H-Score	105.604
		tumour: % Stain 2 Positive Cells	0		tumour: % Stain 2 Positive Cells	0		tumour: % Stain 2 Positive Cells	0		tumour: % Stain 2 Positive Cells	0		tumour: % Stain 2 Positive Cells	0		tumour: % Stain 2 Positive Cells	0		tumour: % Stain 2 Positive Cells	0		tumour: % Stain 2 Positive Cells	0
		tumour: % Stain 2 0+ Cells	100		tumour: % Stain 2 0+ Cells	100		tumour: % Stain 2 0+ Cells	100		tumour: % Stain 2 0+ Cells	100		tumour: % Stain 2 0+ Cells	100		tumour: % Stain 2 0+ Cells	100		tumour: % Stain 2 0+ Cells	100		tumour: % Stain 2 0+ Cells	100
		tumour: % Stain 2 1+ Cells	0		tumour: % Stain 2 1+ Cells	0		tumour: % Stain 2 1+ Cells	0		tumour: % Stain 2 1+ Cells	0		tumour: % Stain 2 1+ Cells	0		tumour: % Stain 2 1+ Cells	0		tumour: % Stain 2 1+ Cells	0		tumour: % Stain 2 1+ Cells	0
		tumour: % Stain 2 2+ Cells	0		tumour: % Stain 2 2+ Cells	0		tumour: % Stain 2 2+ Cells	0		tumour: % Stain 2 2+ Cells	0		tumour: % Stain 2 2+ Cells	0		tumour: % Stain 2 2+ Cells	0		tumour: % Stain 2 2+ Cells	0		tumour: % Stain 2 2+ Cells	0
		tumour: % Stain 2 3+ Cells	0		tumour: % Stain 2 3+ Cells	0		tumour: % Stain 2 3+ Cells	0		tumour: % Stain 2 3+ Cells	0		tumour: % Stain 2 3+ Cells	0		tumour: % Stain 2 3+ Cells	0		tumour: % Stain 2 3+ Cells	0		tumour: % Stain 2 3+ Cells	0
		tumour: Stain 2 H-Score	0		tumour: Stain 2 H-Score	0		tumour: Stain 2 H-Score	0		tumour: Stain 2 H-Score	0		tumour: Stain 2 H-Score	0		tumour: Stain 2 H-Score	0		tumour: Stain 2 H-Score	0		tumour: Stain 2 H-Score	0
		tumour: % Dual Positive Cells	0		tumour: % Dual Positive Cells	0		tumour: % Dual Positive Cells	0		tumour: % Dual Positive Cells	0		tumour: % Dual Positive Cells	0		tumour: % Dual Positive Cells	0		tumour: % Dual Positive Cells	0		tumour: % Dual Positive Cells	0
		tumour: % Dual Negative Cells	81.5734		tumour: % Dual Negative Cells	47.1585		tumour: % Dual Negative Cells	46.4554		tumour: % Dual Negative Cells	42.776		tumour: % Dual Negative Cells	25.5038		tumour: % Dual Negative Cells	42.8929		tumour: % Dual Negative Cells	63.0731		tumour: % Dual Negative Cells	50.1042
		tumour: Avg Stain 1 Nuclear OD	0.108952		tumour: Avg Stain 1 Nuclear OD	0.268132		tumour: Avg Stain 1 Nuclear OD	0.27965		tumour: Avg Stain 1 Nuclear OD	0.287649		tumour: Avg Stain 1 Nuclear OD	0.35577		tumour: Avg Stain 1 Nuclear OD	0.292095		tumour: Avg Stain 1 Nuclear OD	0.186352		tumour: Avg Stain 1 Nuclear OD	0.256214
		tumour: Avg Stain 2 Nuclear OD	0.0408027		tumour: Avg Stain 2 Nuclear OD	0.0515654		tumour: Avg Stain 2 Nuclear OD	0.0531563		tumour: Avg Stain 2 Nuclear OD	0.0520904		tumour: Avg Stain 2 Nuclear OD	0.0575571		tumour: Avg Stain 2 Nuclear OD	0.0532711		tumour: Avg Stain 2 Nuclear OD	0.0460885		tumour: Avg Stain 2 Nuclear OD	0.0500368
		tumour: Avg Stain 1 Cytoplasmic OD	0.0428675		tumour: Avg Stain 1 Cytoplasmic OD	0.0696166		tumour: Avg Stain 1 Cytoplasmic OD	0.07139		tumour: Avg Stain 1 Cytoplasmic OD	0.0711519		tumour: Avg Stain 1 Cytoplasmic OD	0.0857569		tumour: Avg Stain 1 Cytoplasmic OD	0.0727395		tumour: Avg Stain 1 Cytoplasmic OD	0.0563185		tumour: Avg Stain 1 Cytoplasmic OD	0.0670981
		tumour: Avg Stain 2 Cytoplasmic OD	0.0320828		tumour: Avg Stain 2 Cytoplasmic OD	0.0324324		tumour: Avg Stain 2 Cytoplasmic OD	0.0322847		tumour: Avg Stain 2 Cytoplasmic OD	0.0321997		tumour: Avg Stain 2 Cytoplasmic OD	0.0326165		tumour: Avg Stain 2 Cytoplasmic OD	0.0324448		tumour: Avg Stain 2 Cytoplasmic OD	0.0322786		tumour: Avg Stain 2 Cytoplasmic OD	0.0322616
		tumour: Avg Cell Area (µm²)	97.0436		tumour: Avg Cell Area (µm²)	111.052		tumour: Avg Cell Area (µm²)	107.683		tumour: Avg Cell Area (µm²)	106.747		tumour: Avg Cell Area (µm²)	107.314		tumour: Avg Cell Area (µm²)	107.469		tumour: Avg Cell Area (µm²)	111.718		tumour: Avg Cell Area (µm²)	105.153
		tumour: Avg Cytoplasm Area (µm²)	75.5558		tumour: Avg Cytoplasm Area (µm²)	82.973		tumour: Avg Cytoplasm Area (µm²)	81.2118		tumour: Avg Cytoplasm Area (µm²)	81.8249		tumour: Avg Cytoplasm Area (µm²)	80.0775		tumour: Avg Cytoplasm Area (µm²)	81.3298		tumour: Avg Cytoplasm Area (µm²)	86.0053		tumour: Avg Cytoplasm Area (µm²)	80.7415
		tumour: Avg Nucleus Area (µm²)	21.4878		tumour: Avg Nucleus Area (µm²)	28.0793		tumour: Avg Nucleus Area (µm²)	26.4712		tumour: Avg Nucleus Area (µm²)	24.9218		tumour: Avg Nucleus Area (µm²)	27.2362		tumour: Avg Nucleus Area (µm²)	26.1396		tumour: Avg Nucleus Area (µm²)	25.7132		tumour: Avg Nucleus Area (µm²)	24.4114
		tumour: Avg Nucleus Perimeter (µm)	8.51724		tumour: Avg Nucleus Perimeter (µm)	10.8241		tumour: Avg Nucleus Perimeter (µm)	10.4051		tumour: Avg Nucleus Perimeter (µm)	9.83609		tumour: Avg Nucleus Perimeter (µm)	10.7292		tumour: Avg Nucleus Perimeter (µm)	10.2939		tumour: Avg Nucleus Perimeter (µm)	10.0471		tumour: Avg Nucleus Perimeter (µm)	9.66022
		tumour: Avg Nucleus Roundness	0.692354		tumour: Avg Nucleus Roundness	0.702408		tumour: Avg Nucleus Roundness	0.699755		tumour: Avg Nucleus Roundness	0.700808		tumour: Avg Nucleus Roundness	0.698623		tumour: Avg Nucleus Roundness	0.703333		tumour: Avg Nucleus Roundness	0.704381		tumour: Avg Nucleus Roundness	0.700004
		tumour: Tissue Area (µm²)	1581060		tumour: Tissue Area (µm²)	1793360		tumour: Tissue Area (µm²)	1330160		tumour: Tissue Area (µm²)	1461250		tumour: Tissue Area (µm²)	1090440		tumour: Tissue Area (µm²)	1633420		tumour: Tissue Area (µm²)	1450490		tumour: Tissue Area (µm²)	1148390

## Sheet: Sheet2
		BSNA7.2d	WT
		Layer 1			Layer2			Layer 3			Layer4			Layer 5			Layer6			Layer 7			Layer8
		Name	Value		Name	Value		Name	Value		Name	Value		Name	Value		Name	Value		Name	Value		Name	Value
		Classified Area (mm²)	2.43019		Classified Area (mm²)	1.9391		Classified Area (mm²)	2.7151		Classified Area (mm²)	1.80472		Classified Area (mm²)	2.12915		Classified Area (mm²)	2.04325		Classified Area (mm²)	0.86274		Classified Area (mm²)	1.3405
		tumour Area (mm²)	2.42864		tumour Area (mm²)	1.93907		tumour Area (mm²)	2.70759		tumour Area (mm²)	1.79957		tumour Area (mm²)	2.12915		tumour Area (mm²)	2.02547		tumour Area (mm²)	0.82676		tumour Area (mm²)	1.24656
		empty Area (mm²)	0		empty Area (mm²)	3e-05		empty Area (mm²)	0.00471		empty Area (mm²)	0		empty Area (mm²)	0		empty Area (mm²)	0		empty Area (mm²)	0		empty Area (mm²)	0.01898
		necrosis Area (mm²)	0		necrosis Area (mm²)	0		necrosis Area (mm²)	0		necrosis Area (mm²)	0		necrosis Area (mm²)	0		necrosis Area (mm²)	0.00082		necrosis Area (mm²)	0		necrosis Area (mm²)	0.00113
		normal Area (mm²)	0.00155		normal Area (mm²)	0		normal Area (mm²)	0.0028		normal Area (mm²)	0.00514		normal Area (mm²)	0		normal Area (mm²)	0.01696		normal Area (mm²)	0.03598		normal Area (mm²)	0.07383
		Total Cells	10023		Total Cells	9007		Total Cells	10563		Total Cells	7635		Total Cells	8575		Total Cells	7969		Total Cells	4325		Total Cells	4715
		Stain 1 Positive Cells	6254		Stain 1 Positive Cells	7441		Stain 1 Positive Cells	6713		Stain 1 Positive Cells	4542		Stain 1 Positive Cells	5578		Stain 1 Positive Cells	3767		Stain 1 Positive Cells	2083		Stain 1 Positive Cells	1493
		Stain 1 0+ Cells	3769		Stain 1 0+ Cells	1566		Stain 1 0+ Cells	3850		Stain 1 0+ Cells	3093		Stain 1 0+ Cells	2997		Stain 1 0+ Cells	4202		Stain 1 0+ Cells	2242		Stain 1 0+ Cells	3222
		Stain 1 1+ Cells	2287		Stain 1 1+ Cells	2121		Stain 1 1+ Cells	2399		Stain 1 1+ Cells	1315		Stain 1 1+ Cells	1625		Stain 1 1+ Cells	1032		Stain 1 1+ Cells	623		Stain 1 1+ Cells	468
		Stain 1 2+ Cells	2781		Stain 1 2+ Cells	3864		Stain 1 2+ Cells	2868		Stain 1 2+ Cells	1804		Stain 1 2+ Cells	2223		Stain 1 2+ Cells	1649		Stain 1 2+ Cells	913		Stain 1 2+ Cells	590
		Stain 1 3+ Cells	1186		Stain 1 3+ Cells	1456		Stain 1 3+ Cells	1446		Stain 1 3+ Cells	1423		Stain 1 3+ Cells	1730		Stain 1 3+ Cells	1086		Stain 1 3+ Cells	547		Stain 1 3+ Cells	435
		Stain 2 Positive Cells	0		Stain 2 Positive Cells	0		Stain 2 Positive Cells	0		Stain 2 Positive Cells	0		Stain 2 Positive Cells	0		Stain 2 Positive Cells	0		Stain 2 Positive Cells	0		Stain 2 Positive Cells	0
		Stain 2 0+ Cells	10023		Stain 2 0+ Cells	9007		Stain 2 0+ Cells	10563		Stain 2 0+ Cells	7635		Stain 2 0+ Cells	8575		Stain 2 0+ Cells	7969		Stain 2 0+ Cells	4325		Stain 2 0+ Cells	4715
		Stain 2 1+ Cells	0		Stain 2 1+ Cells	0		Stain 2 1+ Cells	0		Stain 2 1+ Cells	0		Stain 2 1+ Cells	0		Stain 2 1+ Cells	0		Stain 2 1+ Cells	0		Stain 2 1+ Cells	0
		Stain 2 2+ Cells	0		Stain 2 2+ Cells	0		Stain 2 2+ Cells	0		Stain 2 2+ Cells	0		Stain 2 2+ Cells	0		Stain 2 2+ Cells	0		Stain 2 2+ Cells	0		Stain 2 2+ Cells	0
		Stain 2 3+ Cells	0		Stain 2 3+ Cells	0		Stain 2 3+ Cells	0		Stain 2 3+ Cells	0		Stain 2 3+ Cells	0		Stain 2 3+ Cells	0		Stain 2 3+ Cells	0		Stain 2 3+ Cells	0
		Dual Positive Cells	0		Dual Positive Cells	0		Dual Positive Cells	0		Dual Positive Cells	0		Dual Positive Cells	0		Dual Positive Cells	0		Dual Positive Cells	0		Dual Positive Cells	0
		Dual Negative Cells	3769		Dual Negative Cells	1566		Dual Negative Cells	3850		Dual Negative Cells	3093		Dual Negative Cells	2997		Dual Negative Cells	4202		Dual Negative Cells	2242		Dual Negative Cells	3222
		% Stain 1 Positive Cells	62.3965		% Stain 1 Positive Cells	82.6135		% Stain 1 Positive Cells	63.552		% Stain 1 Positive Cells	59.4892		% Stain 1 Positive Cells	65.0496		% Stain 1 Positive Cells	47.2707		% Stain 1 Positive Cells	48.1618		% Stain 1 Positive Cells	31.6649		57.5248
		% Stain 1 0+ Cells	37.6035		% Stain 1 0+ Cells	17.3865		% Stain 1 0+ Cells	36.448		% Stain 1 0+ Cells	40.5108		% Stain 1 0+ Cells	34.9504		% Stain 1 0+ Cells	52.7293		% Stain 1 0+ Cells	51.8382		% Stain 1 0+ Cells	68.3351
		% Stain 1 1+ Cells	22.8175		% Stain 1 1+ Cells	23.5484		% Stain 1 1+ Cells	22.7114		% Stain 1 1+ Cells	17.2233		% Stain 1 1+ Cells	18.9504		% Stain 1 1+ Cells	12.9502		% Stain 1 1+ Cells	14.4046		% Stain 1 1+ Cells	9.92577
		% Stain 1 2+ Cells	27.7462		% Stain 1 2+ Cells	42.9		% Stain 1 2+ Cells	27.1514		% Stain 1 2+ Cells	23.628		% Stain 1 2+ Cells	25.9242		% Stain 1 2+ Cells	20.6927		% Stain 1 2+ Cells	21.1098		% Stain 1 2+ Cells	12.5133
		% Stain 1 3+ Cells	11.8328		% Stain 1 3+ Cells	16.1652		% Stain 1 3+ Cells	13.6893		% Stain 1 3+ Cells	18.6379		% Stain 1 3+ Cells	20.1749		% Stain 1 3+ Cells	13.6278		% Stain 1 3+ Cells	12.6474		% Stain 1 3+ Cells	9.22587
		Stain 1 H-Score	113.808		Stain 1 H-Score	157.844		Stain 1 H-Score	118.082		Stain 1 H-Score	120.393		Stain 1 H-Score	131.324		Stain 1 H-Score	95.219		Stain 1 H-Score	94.5665		Stain 1 H-Score	62.6299
		% Stain 2 Positive Cells	0		% Stain 2 Positive Cells	0		% Stain 2 Positive Cells	0		% Stain 2 Positive Cells	0		% Stain 2 Positive Cells	0		% Stain 2 Positive Cells	0		% Stain 2 Positive Cells	0		% Stain 2 Positive Cells	0
		% Stain 2 0+ Cells	100		% Stain 2 0+ Cells	100		% Stain 2 0+ Cells	100		% Stain 2 0+ Cells	100		% Stain 2 0+ Cells	100		% Stain 2 0+ Cells	100		% Stain 2 0+ Cells	100		% Stain 2 0+ Cells	100
		% Stain 2 1+ Cells	0		% Stain 2 1+ Cells	0		% Stain 2 1+ Cells	0		% Stain 2 1+ Cells	0		% Stain 2 1+ Cells	0		% Stain 2 1+ Cells	0		% Stain 2 1+ Cells	0		% Stain 2 1+ Cells	0
		% Stain 2 2+ Cells	0		% Stain 2 2+ Cells	0		% Stain 2 2+ Cells	0		% Stain 2 2+ Cells	0		% Stain 2 2+ Cells	0		% Stain 2 2+ Cells	0		% Stain 2 2+ Cells	0		% Stain 2 2+ Cells	0
		% Stain 2 3+ Cells	0		% Stain 2 3+ Cells	0		% Stain 2 3+ Cells	0		% Stain 2 3+ Cells	0		% Stain 2 3+ Cells	0		% Stain 2 3+ Cells	0		% Stain 2 3+ Cells	0		% Stain 2 3+ Cells	0
		Stain 2 H-Score	0		Stain 2 H-Score	0		Stain 2 H-Score	0		Stain 2 H-Score	0		Stain 2 H-Score	0		Stain 2 H-Score	0		Stain 2 H-Score	0		Stain 2 H-Score	0
		% Dual Positive Cells	0		% Dual Positive Cells	0		% Dual Positive Cells	0		% Dual Positive Cells	0		% Dual Positive Cells	0		% Dual Positive Cells	0		% Dual Positive Cells	0		% Dual Positive Cells	0
		% Dual Negative Cells	37.6035		% Dual Negative Cells	17.3865		% Dual Negative Cells	36.448		% Dual Negative Cells	40.5108		% Dual Negative Cells	34.9504		% Dual Negative Cells	52.7293		% Dual Negative Cells	51.8382		% Dual Negative Cells	68.3351
		Avg Stain 1 Nuclear OD	0.253836		Avg Stain 1 Nuclear OD	0.338544		Avg Stain 1 Nuclear OD	0.264184		Avg Stain 1 Nuclear OD	0.278965		Avg Stain 1 Nuclear OD	0.301704		Avg Stain 1 Nuclear OD	0.224581		Avg Stain 1 Nuclear OD	0.225982		Avg Stain 1 Nuclear OD	0.160365
		Avg Stain 2 Nuclear OD	0.044452		Avg Stain 2 Nuclear OD	0.0480244		Avg Stain 2 Nuclear OD	0.0477095		Avg Stain 2 Nuclear OD	0.0503784		Avg Stain 2 Nuclear OD	0.0518708		Avg Stain 2 Nuclear OD	0.0470512		Avg Stain 2 Nuclear OD	0.0450233		Avg Stain 2 Nuclear OD	0.0443227
		Avg Stain 1 Cytoplasmic OD	0.0745298		Avg Stain 1 Cytoplasmic OD	0.0856258		Avg Stain 1 Cytoplasmic OD	0.0709431		Avg Stain 1 Cytoplasmic OD	0.0757598		Avg Stain 1 Cytoplasmic OD	0.077071		Avg Stain 1 Cytoplasmic OD	0.0583796		Avg Stain 1 Cytoplasmic OD	0.0683349		Avg Stain 1 Cytoplasmic OD	0.0498104
		Avg Stain 2 Cytoplasmic OD	0.0322324		Avg Stain 2 Cytoplasmic OD	0.0325414		Avg Stain 2 Cytoplasmic OD	0.0324248		Avg Stain 2 Cytoplasmic OD	0.0324397		Avg Stain 2 Cytoplasmic OD	0.032413		Avg Stain 2 Cytoplasmic OD	0.0321877		Avg Stain 2 Cytoplasmic OD	0.0323401		Avg Stain 2 Cytoplasmic OD	0.0325323
		Avg Cell Area (µm²)	107.488		Avg Cell Area (µm²)	97.8686		Avg Cell Area (µm²)	106.211		Avg Cell Area (µm²)	106.639		Avg Cell Area (µm²)	107.746		Avg Cell Area (µm²)	100.123		Avg Cell Area (µm²)	89.6676		Avg Cell Area (µm²)	94.1553
		Avg Cytoplasm Area (µm²)	82.4015		Avg Cytoplasm Area (µm²)	74.8549		Avg Cytoplasm Area (µm²)	83.5291		Avg Cytoplasm Area (µm²)	81.7872		Avg Cytoplasm Area (µm²)	83.4472		Avg Cytoplasm Area (µm²)	79.3697		Avg Cytoplasm Area (µm²)	68.6415		Avg Cytoplasm Area (µm²)	73.3954
		Avg Nucleus Area (µm²)	25.0863		Avg Nucleus Area (µm²)	23.0137		Avg Nucleus Area (µm²)	22.6817		Avg Nucleus Area (µm²)	24.8519		Avg Nucleus Area (µm²)	24.2985		Avg Nucleus Area (µm²)	20.7536		Avg Nucleus Area (µm²)	21.0261		Avg Nucleus Area (µm²)	20.7599
		Avg Nucleus Perimeter (µm)	9.79954		Avg Nucleus Perimeter (µm)	9.08466		Avg Nucleus Perimeter (µm)	8.95381		Avg Nucleus Perimeter (µm)	9.76156		Avg Nucleus Perimeter (µm)	9.579		Avg Nucleus Perimeter (µm)	8.22227		Avg Nucleus Perimeter (µm)	8.33177		Avg Nucleus Perimeter (µm)	8.24429
		Avg Nucleus Roundness	0.700752		Avg Nucleus Roundness	0.695577		Avg Nucleus Roundness	0.706067		Avg Nucleus Roundness	0.697274		Avg Nucleus Roundness	0.705169		Avg Nucleus Roundness	0.704633		Avg Nucleus Roundness	0.692819		Avg Nucleus Roundness	0.690125
		Tissue Area (µm²)	2429940		Tissue Area (µm²)	1933600		Tissue Area (µm²)	2689570		Tissue Area (µm²)	1801230		Tissue Area (µm²)	2130200		Tissue Area (µm²)	1957680		Tissue Area (µm²)	832988		Tissue Area (µm²)	1097300
		tumour: Total Cells	10023		tumour: Total Cells	9007		tumour: Total Cells	10563		tumour: Total Cells	7635		tumour: Total Cells	8575		tumour: Total Cells	7969		tumour: Total Cells	4325		tumour: Total Cells	4715
		tumour: Stain 1 Positive Cells	6254		tumour: Stain 1 Positive Cells	7441		tumour: Stain 1 Positive Cells	6713		tumour: Stain 1 Positive Cells	4542		tumour: Stain 1 Positive Cells	5578		tumour: Stain 1 Positive Cells	3767		tumour: Stain 1 Positive Cells	2083		tumour: Stain 1 Positive Cells	1493
		tumour: Stain 1 0+ Cells	3769		tumour: Stain 1 0+ Cells	1566		tumour: Stain 1 0+ Cells	3850		tumour: Stain 1 0+ Cells	3093		tumour: Stain 1 0+ Cells	2997		tumour: Stain 1 0+ Cells	4202		tumour: Stain 1 0+ Cells	2242		tumour: Stain 1 0+ Cells	3222
		tumour: Stain 1 1+ Cells	2287		tumour: Stain 1 1+ Cells	2121		tumour: Stain 1 1+ Cells	2399		tumour: Stain 1 1+ Cells	1315		tumour: Stain 1 1+ Cells	1625		tumour: Stain 1 1+ Cells	1032		tumour: Stain 1 1+ Cells	623		tumour: Stain 1 1+ Cells	468
		tumour: Stain 1 2+ Cells	2781		tumour: Stain 1 2+ Cells	3864		tumour: Stain 1 2+ Cells	2868		tumour: Stain 1 2+ Cells	1804		tumour: Stain 1 2+ Cells	2223		tumour: Stain 1 2+ Cells	1649		tumour: Stain 1 2+ Cells	913		tumour: Stain 1 2+ Cells	590
		tumour: Stain 1 3+ Cells	1186		tumour: Stain 1 3+ Cells	1456		tumour: Stain 1 3+ Cells	1446		tumour: Stain 1 3+ Cells	1423		tumour: Stain 1 3+ Cells	1730		tumour: Stain 1 3+ Cells	1086		tumour: Stain 1 3+ Cells	547		tumour: Stain 1 3+ Cells	435
		tumour: Stain 2 Positive Cells	0		tumour: Stain 2 Positive Cells	0		tumour: Stain 2 Positive Cells	0		tumour: Stain 2 Positive Cells	0		tumour: Stain 2 Positive Cells	0		tumour: Stain 2 Positive Cells	0		tumour: Stain 2 Positive Cells	0		tumour: Stain 2 Positive Cells	0
		tumour: Stain 2 0+ Cells	10023		tumour: Stain 2 0+ Cells	9007		tumour: Stain 2 0+ Cells	10563		tumour: Stain 2 0+ Cells	7635		tumour: Stain 2 0+ Cells	8575		tumour: Stain 2 0+ Cells	7969		tumour: Stain 2 0+ Cells	4325		tumour: Stain 2 0+ Cells	4715
		tumour: Stain 2 1+ Cells	0		tumour: Stain 2 1+ Cells	0		tumour: Stain 2 1+ Cells	0		tumour: Stain 2 1+ Cells	0		tumour: Stain 2 1+ Cells	0		tumour: Stain 2 1+ Cells	0		tumour: Stain 2 1+ Cells	0		tumour: Stain 2 1+ Cells	0
		tumour: Stain 2 2+ Cells	0		tumour: Stain 2 2+ Cells	0		tumour: Stain 2 2+ Cells	0		tumour: Stain 2 2+ Cells	0		tumour: Stain 2 2+ Cells	0		tumour: Stain 2 2+ Cells	0		tumour: Stain 2 2+ Cells	0		tumour: Stain 2 2+ Cells	0
		tumour: Stain 2 3+ Cells	0		tumour: Stain 2 3+ Cells	0		tumour: Stain 2 3+ Cells	0		tumour: Stain 2 3+ Cells	0		tumour: Stain 2 3+ Cells	0		tumour: Stain 2 3+ Cells	0		tumour: Stain 2 3+ Cells	0		tumour: Stain 2 3+ Cells	0
		tumour: Dual Positive Cells	0		tumour: Dual Positive Cells	0		tumour: Dual Positive Cells	0		tumour: Dual Positive Cells	0		tumour: Dual Positive Cells	0		tumour: Dual Positive Cells	0		tumour: Dual Positive Cells	0		tumour: Dual Positive Cells	0
		tumour: Dual Negative Cells	3769		tumour: Dual Negative Cells	1566		tumour: Dual Negative Cells	3850		tumour: Dual Negative Cells	3093		tumour: Dual Negative Cells	2997		tumour: Dual Negative Cells	4202		tumour: Dual Negative Cells	2242		tumour: Dual Negative Cells	3222
		tumour: % Stain 1 Positive Cells	62.3965		tumour: % Stain 1 Positive Cells	82.6135		tumour: % Stain 1 Positive Cells	63.552		tumour: % Stain 1 Positive Cells	59.4892		tumour: % Stain 1 Positive Cells	65.0496		tumour: % Stain 1 Positive Cells	47.2707		tumour: % Stain 1 Positive Cells	48.1618		tumour: % Stain 1 Positive Cells	31.6649
		tumour: % Stain 1 0+ Cells	37.6035		tumour: % Stain 1 0+ Cells	17.3865		tumour: % Stain 1 0+ Cells	36.448		tumour: % Stain 1 0+ Cells	40.5108		tumour: % Stain 1 0+ Cells	34.9504		tumour: % Stain 1 0+ Cells	52.7293		tumour: % Stain 1 0+ Cells	51.8382		tumour: % Stain 1 0+ Cells	68.3351
		tumour: % Stain 1 1+ Cells	22.8175		tumour: % Stain 1 1+ Cells	23.5484		tumour: % Stain 1 1+ Cells	22.7114		tumour: % Stain 1 1+ Cells	17.2233		tumour: % Stain 1 1+ Cells	18.9504		tumour: % Stain 1 1+ Cells	12.9502		tumour: % Stain 1 1+ Cells	14.4046		tumour: % Stain 1 1+ Cells	9.92577
		tumour: % Stain 1 2+ Cells	27.7462		tumour: % Stain 1 2+ Cells	42.9		tumour: % Stain 1 2+ Cells	27.1514		tumour: % Stain 1 2+ Cells	23.628		tumour: % Stain 1 2+ Cells	25.9242		tumour: % Stain 1 2+ Cells	20.6927		tumour: % Stain 1 2+ Cells	21.1098		tumour: % Stain 1 2+ Cells	12.5133
		tumour: % Stain 1 3+ Cells	11.8328		tumour: % Stain 1 3+ Cells	16.1652		tumour: % Stain 1 3+ Cells	13.6893		tumour: % Stain 1 3+ Cells	18.6379		tumour: % Stain 1 3+ Cells	20.1749		tumour: % Stain 1 3+ Cells	13.6278		tumour: % Stain 1 3+ Cells	12.6474		tumour: % Stain 1 3+ Cells	9.22587
		tumour: Stain 1 H-Score	113.808		tumour: Stain 1 H-Score	157.844		tumour: Stain 1 H-Score	118.082		tumour: Stain 1 H-Score	120.393		tumour: Stain 1 H-Score	131.324		tumour: Stain 1 H-Score	95.219		tumour: Stain 1 H-Score	94.5665		tumour: Stain 1 H-Score	62.6299
		tumour: % Stain 2 Positive Cells	0		tumour: % Stain 2 Positive Cells	0		tumour: % Stain 2 Positive Cells	0		tumour: % Stain 2 Positive Cells	0		tumour: % Stain 2 Positive Cells	0		tumour: % Stain 2 Positive Cells	0		tumour: % Stain 2 Positive Cells	0		tumour: % Stain 2 Positive Cells	0
		tumour: % Stain 2 0+ Cells	100		tumour: % Stain 2 0+ Cells	100		tumour: % Stain 2 0+ Cells	100		tumour: % Stain 2 0+ Cells	100		tumour: % Stain 2 0+ Cells	100		tumour: % Stain 2 0+ Cells	100		tumour: % Stain 2 0+ Cells	100		tumour: % Stain 2 0+ Cells	100
		tumour: % Stain 2 1+ Cells	0		tumour: % Stain 2 1+ Cells	0		tumour: % Stain 2 1+ Cells	0		tumour: % Stain 2 1+ Cells	0		tumour: % Stain 2 1+ Cells	0		tumour: % Stain 2 1+ Cells	0		tumour: % Stain 2 1+ Cells	0		tumour: % Stain 2 1+ Cells	0
		tumour: % Stain 2 2+ Cells	0		tumour: % Stain 2 2+ Cells	0		tumour: % Stain 2 2+ Cells	0		tumour: % Stain 2 2+ Cells	0		tumour: % Stain 2 2+ Cells	0		tumour: % Stain 2 2+ Cells	0		tumour: % Stain 2 2+ Cells	0		tumour: % Stain 2 2+ Cells	0
		tumour: % Stain 2 3+ Cells	0		tumour: % Stain 2 3+ Cells	0		tumour: % Stain 2 3+ Cells	0		tumour: % Stain 2 3+ Cells	0		tumour: % Stain 2 3+ Cells	0		tumour: % Stain 2 3+ Cells	0		tumour: % Stain 2 3+ Cells	0		tumour: % Stain 2 3+ Cells	0
		tumour: Stain 2 H-Score	0		tumour: Stain 2 H-Score	0		tumour: Stain 2 H-Score	0		tumour: Stain 2 H-Score	0		tumour: Stain 2 H-Score	0		tumour: Stain 2 H-Score	0		tumour: Stain 2 H-Score	0		tumour: Stain 2 H-Score	0
		tumour: % Dual Positive Cells	0		tumour: % Dual Positive Cells	0		tumour: % Dual Positive Cells	0		tumour: % Dual Positive Cells	0		tumour: % Dual Positive Cells	0		tumour: % Dual Positive Cells	0		tumour: % Dual Positive Cells	0		tumour: % Dual Positive Cells	0
		tumour: % Dual Negative Cells	37.6035		tumour: % Dual Negative Cells	17.3865		tumour: % Dual Negative Cells	36.448		tumour: % Dual Negative Cells	40.5108		tumour: % Dual Negative Cells	34.9504		tumour: % Dual Negative Cells	52.7293		tumour: % Dual Negative Cells	51.8382		tumour: % Dual Negative Cells	68.3351
		tumour: Avg Stain 1 Nuclear OD	0.253836		tumour: Avg Stain 1 Nuclear OD	0.338544		tumour: Avg Stain 1 Nuclear OD	0.264184		tumour: Avg Stain 1 Nuclear OD	0.278965		tumour: Avg Stain 1 Nuclear OD	0.301704		tumour: Avg Stain 1 Nuclear OD	0.224581		tumour: Avg Stain 1 Nuclear OD	0.225982		tumour: Avg Stain 1 Nuclear OD	0.160365
		tumour: Avg Stain 2 Nuclear OD	0.044452		tumour: Avg Stain 2 Nuclear OD	0.0480244		tumour: Avg Stain 2 Nuclear OD	0.0477095		tumour: Avg Stain 2 Nuclear OD	0.0503784		tumour: Avg Stain 2 Nuclear OD	0.0518708		tumour: Avg Stain 2 Nuclear OD	0.0470512		tumour: Avg Stain 2 Nuclear OD	0.0450233		tumour: Avg Stain 2 Nuclear OD	0.0443227
		tumour: Avg Stain 1 Cytoplasmic OD	0.0745298		tumour: Avg Stain 1 Cytoplasmic OD	0.0856258		tumour: Avg Stain 1 Cytoplasmic OD	0.0709431		tumour: Avg Stain 1 Cytoplasmic OD	0.0757598		tumour: Avg Stain 1 Cytoplasmic OD	0.077071		tumour: Avg Stain 1 Cytoplasmic OD	0.0583796		tumour: Avg Stain 1 Cytoplasmic OD	0.0683349		tumour: Avg Stain 1 Cytoplasmic OD	0.0498104
		tumour: Avg Stain 2 Cytoplasmic OD	0.0322324		tumour: Avg Stain 2 Cytoplasmic OD	0.0325414		tumour: Avg Stain 2 Cytoplasmic OD	0.0324248		tumour: Avg Stain 2 Cytoplasmic OD	0.0324397		tumour: Avg Stain 2 Cytoplasmic OD	0.032413		tumour: Avg Stain 2 Cytoplasmic OD	0.0321877		tumour: Avg Stain 2 Cytoplasmic OD	0.0323401		tumour: Avg Stain 2 Cytoplasmic OD	0.0325323
		tumour: Avg Cell Area (µm²)	107.488		tumour: Avg Cell Area (µm²)	97.8686		tumour: Avg Cell Area (µm²)	106.211		tumour: Avg Cell Area (µm²)	106.639		tumour: Avg Cell Area (µm²)	107.746		tumour: Avg Cell Area (µm²)	100.123		tumour: Avg Cell Area (µm²)	89.6676		tumour: Avg Cell Area (µm²)	94.1553
		tumour: Avg Cytoplasm Area (µm²)	82.4015		tumour: Avg Cytoplasm Area (µm²)	74.8549		tumour: Avg Cytoplasm Area (µm²)	83.5291		tumour: Avg Cytoplasm Area (µm²)	81.7872		tumour: Avg Cytoplasm Area (µm²)	83.4472		tumour: Avg Cytoplasm Area (µm²)	79.3697		tumour: Avg Cytoplasm Area (µm²)	68.6415		tumour: Avg Cytoplasm Area (µm²)	73.3954
		tumour: Avg Nucleus Area (µm²)	25.0863		tumour: Avg Nucleus Area (µm²)	23.0137		tumour: Avg Nucleus Area (µm²)	22.6817		tumour: Avg Nucleus Area (µm²)	24.8519		tumour: Avg Nucleus Area (µm²)	24.2985		tumour: Avg Nucleus Area (µm²)	20.7536		tumour: Avg Nucleus Area (µm²)	21.0261		tumour: Avg Nucleus Area (µm²)	20.7599
		tumour: Avg Nucleus Perimeter (µm)	9.79954		tumour: Avg Nucleus Perimeter (µm)	9.08466		tumour: Avg Nucleus Perimeter (µm)	8.95381		tumour: Avg Nucleus Perimeter (µm)	9.76156		tumour: Avg Nucleus Perimeter (µm)	9.579		tumour: Avg Nucleus Perimeter (µm)	8.22227		tumour: Avg Nucleus Perimeter (µm)	8.33177		tumour: Avg Nucleus Perimeter (µm)	8.24429
		tumour: Avg Nucleus Roundness	0.700752		tumour: Avg Nucleus Roundness	0.695577		tumour: Avg Nucleus Roundness	0.706067		tumour: Avg Nucleus Roundness	0.697274		tumour: Avg Nucleus Roundness	0.705169		tumour: Avg Nucleus Roundness	0.704633		tumour: Avg Nucleus Roundness	0.692819		tumour: Avg Nucleus Roundness	0.690125
		tumour: Tissue Area (µm²)	2429940		tumour: Tissue Area (µm²)	1933600		tumour: Tissue Area (µm²)	2689570		tumour: Tissue Area (µm²)	1801230		tumour: Tissue Area (µm²)	2130200		tumour: Tissue Area (µm²)	1957680		tumour: Tissue Area (µm²)	832988		tumour: Tissue Area (µm²)	1097300
		BSNA7.2g	WT
		Name	Value		Name	Value		Name	Value		Name	Value		Name	Value		Name	Value		Name	Value		Name	Value
		Classified Area (mm²)	3.33252		Classified Area (mm²)	1.56237		Classified Area (mm²)	1.71558		Classified Area (mm²)	1.67327		Classified Area (mm²)	2.6454		Classified Area (mm²)	1.74586		Classified Area (mm²)	2.37897		Classified Area (mm²)	1.83356
		tumour Area (mm²)	3.27928		tumour Area (mm²)	1.52944		tumour Area (mm²)	1.37088		tumour Area (mm²)	1.63586		tumour Area (mm²)	2.52821		tumour Area (mm²)	1.53761		tumour Area (mm²)	2.34566		tumour Area (mm²)	1.83206
		empty Area (mm²)	0		empty Area (mm²)	0		empty Area (mm²)	0		empty Area (mm²)	0.00019		empty Area (mm²)	0		empty Area (mm²)	0		empty Area (mm²)	0.02769		empty Area (mm²)	0
		necrosis Area (mm²)	0		necrosis Area (mm²)	0		necrosis Area (mm²)	0		necrosis Area (mm²)	0		necrosis Area (mm²)	0		necrosis Area (mm²)	0		necrosis Area (mm²)	0		necrosis Area (mm²)	0
		normal Area (mm²)	0.05323		normal Area (mm²)	0.03293		normal Area (mm²)	0.34471		normal Area (mm²)	0.03722		normal Area (mm²)	0.11719		normal Area (mm²)	0.20825		normal Area (mm²)	0.00562		normal Area (mm²)	0.0015
		Total Cells	16656		Total Cells	7268		Total Cells	7047		Total Cells	7177		Total Cells	12908		Total Cells	6392		Total Cells	10299		Total Cells	8187
		Stain 1 Positive Cells	12054		Stain 1 Positive Cells	4397		Stain 1 Positive Cells	3827		Stain 1 Positive Cells	4144		Stain 1 Positive Cells	9023		Stain 1 Positive Cells	2211		Stain 1 Positive Cells	7722		Stain 1 Positive Cells	4964
		Stain 1 0+ Cells	4602		Stain 1 0+ Cells	2871		Stain 1 0+ Cells	3220		Stain 1 0+ Cells	3033		Stain 1 0+ Cells	3885		Stain 1 0+ Cells	4181		Stain 1 0+ Cells	2577		Stain 1 0+ Cells	3223
		Stain 1 1+ Cells	2552		Stain 1 1+ Cells	863		Stain 1 1+ Cells	958		Stain 1 1+ Cells	1158		Stain 1 1+ Cells	1582		Stain 1 1+ Cells	702		Stain 1 1+ Cells	1978		Stain 1 1+ Cells	1577
		Stain 1 2+ Cells	5105		Stain 1 2+ Cells	1697		Stain 1 2+ Cells	1668		Stain 1 2+ Cells	1665		Stain 1 2+ Cells	3760		Stain 1 2+ Cells	800		Stain 1 2+ Cells	3190		Stain 1 2+ Cells	1927
		Stain 1 3+ Cells	4397		Stain 1 3+ Cells	1837		Stain 1 3+ Cells	1201		Stain 1 3+ Cells	1321		Stain 1 3+ Cells	3681		Stain 1 3+ Cells	709		Stain 1 3+ Cells	2554		Stain 1 3+ Cells	1460
		Stain 2 Positive Cells	0		Stain 2 Positive Cells	0		Stain 2 Positive Cells	0		Stain 2 Positive Cells	0		Stain 2 Positive Cells	0		Stain 2 Positive Cells	0		Stain 2 Positive Cells	0		Stain 2 Positive Cells	0
		Stain 2 0+ Cells	16656		Stain 2 0+ Cells	7268		Stain 2 0+ Cells	7047		Stain 2 0+ Cells	7177		Stain 2 0+ Cells	12908		Stain 2 0+ Cells	6392		Stain 2 0+ Cells	10299		Stain 2 0+ Cells	8187
		Stain 2 1+ Cells	0		Stain 2 1+ Cells	0		Stain 2 1+ Cells	0		Stain 2 1+ Cells	0		Stain 2 1+ Cells	0		Stain 2 1+ Cells	0		Stain 2 1+ Cells	0		Stain 2 1+ Cells	0
		Stain 2 2+ Cells	0		Stain 2 2+ Cells	0		Stain 2 2+ Cells	0		Stain 2 2+ Cells	0		Stain 2 2+ Cells	0		Stain 2 2+ Cells	0		Stain 2 2+ Cells	0		Stain 2 2+ Cells	0
		Stain 2 3+ Cells	0		Stain 2 3+ Cells	0		Stain 2 3+ Cells	0		Stain 2 3+ Cells	0		Stain 2 3+ Cells	0		Stain 2 3+ Cells	0		Stain 2 3+ Cells	0		Stain 2 3+ Cells	0
		Dual Positive Cells	0		Dual Positive Cells	0		Dual Positive Cells	0		Dual Positive Cells	0		Dual Positive Cells	0		Dual Positive Cells	0		Dual Positive Cells	0		Dual Positive Cells	0
		Dual Negative Cells	4602		Dual Negative Cells	2871		Dual Negative Cells	3220		Dual Negative Cells	3033		Dual Negative Cells	3885		Dual Negative Cells	4181		Dual Negative Cells	2577		Dual Negative Cells	3223
		% Stain 1 Positive Cells	72.3703		% Stain 1 Positive Cells	60.4981		% Stain 1 Positive Cells	54.3068		% Stain 1 Positive Cells	57.74		% Stain 1 Positive Cells	69.9024		% Stain 1 Positive Cells	34.5901		% Stain 1 Positive Cells	74.9782		% Stain 1 Positive Cells	60.6327		60.6273
		% Stain 1 0+ Cells	27.6297		% Stain 1 0+ Cells	39.5019		% Stain 1 0+ Cells	45.6932		% Stain 1 0+ Cells	42.26		% Stain 1 0+ Cells	30.0976		% Stain 1 0+ Cells	65.4099		% Stain 1 0+ Cells	25.0218		% Stain 1 0+ Cells	39.3673
		% Stain 1 1+ Cells	15.3218		% Stain 1 1+ Cells	11.874		% Stain 1 1+ Cells	13.5944		% Stain 1 1+ Cells	16.1349		% Stain 1 1+ Cells	12.256		% Stain 1 1+ Cells	10.9825		% Stain 1 1+ Cells	19.2057		% Stain 1 1+ Cells	19.2622
		% Stain 1 2+ Cells	30.6496		% Stain 1 2+ Cells	23.3489		% Stain 1 2+ Cells	23.6696		% Stain 1 2+ Cells	23.1991		% Stain 1 2+ Cells	29.1292		% Stain 1 2+ Cells	12.5156		% Stain 1 2+ Cells	30.9739		% Stain 1 2+ Cells	23.5373
		% Stain 1 3+ Cells	26.3989		% Stain 1 3+ Cells	25.2752		% Stain 1 3+ Cells	17.0427		% Stain 1 3+ Cells	18.406		% Stain 1 3+ Cells	28.5172		% Stain 1 3+ Cells	11.092		% Stain 1 3+ Cells	24.7985		% Stain 1 3+ Cells	17.8332
		Stain 1 H-Score	155.818		Stain 1 H-Score	134.397		Stain 1 H-Score	112.062		Stain 1 H-Score	117.751		Stain 1 H-Score	156.066		Stain 1 H-Score	69.2897		Stain 1 H-Score	155.549		Stain 1 H-Score	119.836
		% Stain 2 Positive Cells	0		% Stain 2 Positive Cells	0		% Stain 2 Positive Cells	0		% Stain 2 Positive Cells	0		% Stain 2 Positive Cells	0		% Stain 2 Positive Cells	0		% Stain 2 Positive Cells	0		% Stain 2 Positive Cells	0
		% Stain 2 0+ Cells	100		% Stain 2 0+ Cells	100		% Stain 2 0+ Cells	100		% Stain 2 0+ Cells	100		% Stain 2 0+ Cells	100		% Stain 2 0+ Cells	100		% Stain 2 0+ Cells	100		% Stain 2 0+ Cells	100
		% Stain 2 1+ Cells	0		% Stain 2 1+ Cells	0		% Stain 2 1+ Cells	0		% Stain 2 1+ Cells	0		% Stain 2 1+ Cells	0		% Stain 2 1+ Cells	0		% Stain 2 1+ Cells	0		% Stain 2 1+ Cells	0
		% Stain 2 2+ Cells	0		% Stain 2 2+ Cells	0		% Stain 2 2+ Cells	0		% Stain 2 2+ Cells	0		% Stain 2 2+ Cells	0		% Stain 2 2+ Cells	0		% Stain 2 2+ Cells	0		% Stain 2 2+ Cells	0
		% Stain 2 3+ Cells	0		% Stain 2 3+ Cells	0		% Stain 2 3+ Cells	0		% Stain 2 3+ Cells	0		% Stain 2 3+ Cells	0		% Stain 2 3+ Cells	0		% Stain 2 3+ Cells	0		% Stain 2 3+ Cells	0
		Stain 2 H-Score	0		Stain 2 H-Score	0		Stain 2 H-Score	0		Stain 2 H-Score	0		Stain 2 H-Score	0		Stain 2 H-Score	0		Stain 2 H-Score	0		Stain 2 H-Score	0
		% Dual Positive Cells	0		% Dual Positive Cells	0		% Dual Positive Cells	0		% Dual Positive Cells	0		% Dual Positive Cells	0		% Dual Positive Cells	0		% Dual Positive Cells	0		% Dual Positive Cells	0
		% Dual Negative Cells	27.6297		% Dual Negative Cells	39.5019		% Dual Negative Cells	45.6932		% Dual Negative Cells	42.26		% Dual Negative Cells	30.0976		% Dual Negative Cells	65.4099		% Dual Negative Cells	25.0218		% Dual Negative Cells	39.3673
		Avg Stain 1 Nuclear OD	0.355966		Avg Stain 1 Nuclear OD	0.317905		Avg Stain 1 Nuclear OD	0.2613		Avg Stain 1 Nuclear OD	0.274193		Avg Stain 1 Nuclear OD	0.359744		Avg Stain 1 Nuclear OD	0.174686		Avg Stain 1 Nuclear OD	0.351852		Avg Stain 1 Nuclear OD	0.280624
		Avg Stain 2 Nuclear OD	0.0537812		Avg Stain 2 Nuclear OD	0.0554825		Avg Stain 2 Nuclear OD	0.0490023		Avg Stain 2 Nuclear OD	0.0499121		Avg Stain 2 Nuclear OD	0.0583703		Avg Stain 2 Nuclear OD	0.04593		Avg Stain 2 Nuclear OD	0.0548024		Avg Stain 2 Nuclear OD	0.0499299
		Avg Stain 1 Cytoplasmic OD	0.100596		Avg Stain 1 Cytoplasmic OD	0.0836469		Avg Stain 1 Cytoplasmic OD	0.0768213		Avg Stain 1 Cytoplasmic OD	0.0766373		Avg Stain 1 Cytoplasmic OD	0.0943253		Avg Stain 1 Cytoplasmic OD	0.0541254		Avg Stain 1 Cytoplasmic OD	0.0932499		Avg Stain 1 Cytoplasmic OD	0.0749947
		Avg Stain 2 Cytoplasmic OD	0.0324639		Avg Stain 2 Cytoplasmic OD	0.0324308		Avg Stain 2 Cytoplasmic OD	0.0323134		Avg Stain 2 Cytoplasmic OD	0.0322208		Avg Stain 2 Cytoplasmic OD	0.0325271		Avg Stain 2 Cytoplasmic OD	0.032326		Avg Stain 2 Cytoplasmic OD	0.0326394		Avg Stain 2 Cytoplasmic OD	0.0323538
		Avg Cell Area (µm²)	100.448		Avg Cell Area (µm²)	100.107		Avg Cell Area (µm²)	94.1343		Avg Cell Area (µm²)	100.376		Avg Cell Area (µm²)	95.8692		Avg Cell Area (µm²)	99.842		Avg Cell Area (µm²)	108.015		Avg Cell Area (µm²)	103.687
		Avg Cytoplasm Area (µm²)	71.1049		Avg Cytoplasm Area (µm²)	73.7331		Avg Cytoplasm Area (µm²)	70.7883		Avg Cytoplasm Area (µm²)	75.7987		Avg Cytoplasm Area (µm²)	69.8617		Avg Cytoplasm Area (µm²)	78.9297		Avg Cytoplasm Area (µm²)	77.8023		Avg Cytoplasm Area (µm²)	77.7793
		Avg Nucleus Area (µm²)	29.3426		Avg Nucleus Area (µm²)	26.374		Avg Nucleus Area (µm²)	23.346		Avg Nucleus Area (µm²)	24.5773		Avg Nucleus Area (µm²)	26.0075		Avg Nucleus Area (µm²)	20.9122		Avg Nucleus Area (µm²)	30.2123		Avg Nucleus Area (µm²)	25.9074
		Avg Nucleus Perimeter (µm)	11.5281		Avg Nucleus Perimeter (µm)	10.3915		Avg Nucleus Perimeter (µm)	9.25343		Avg Nucleus Perimeter (µm)	9.72219		Avg Nucleus Perimeter (µm)	10.2969		Avg Nucleus Perimeter (µm)	8.29139		Avg Nucleus Perimeter (µm)	11.7875		Avg Nucleus Perimeter (µm)	10.1921
		Avg Nucleus Roundness	0.689309		Avg Nucleus Roundness	0.693465		Avg Nucleus Roundness	0.693922		Avg Nucleus Roundness	0.698765		Avg Nucleus Roundness	0.690882		Avg Nucleus Roundness	0.701957		Avg Nucleus Roundness	0.69573		Avg Nucleus Roundness	0.698021
		Tissue Area (µm²)	3289040		Tissue Area (µm²)	1534890		Tissue Area (µm²)	1397070		Tissue Area (µm²)	1632270		Tissue Area (µm²)	2541710		Tissue Area (µm²)	1565420		Tissue Area (µm²)	2330860		Tissue Area (µm²)	1832850
		tumour: Total Cells	16656		tumour: Total Cells	7268		tumour: Total Cells	7047		tumour: Total Cells	7177		tumour: Total Cells	12908		tumour: Total Cells	6392		tumour: Total Cells	10299		tumour: Total Cells	8187
		tumour: Stain 1 Positive Cells	12054		tumour: Stain 1 Positive Cells	4397		tumour: Stain 1 Positive Cells	3827		tumour: Stain 1 Positive Cells	4144		tumour: Stain 1 Positive Cells	9023		tumour: Stain 1 Positive Cells	2211		tumour: Stain 1 Positive Cells	7722		tumour: Stain 1 Positive Cells	4964
		tumour: Stain 1 0+ Cells	4602		tumour: Stain 1 0+ Cells	2871		tumour: Stain 1 0+ Cells	3220		tumour: Stain 1 0+ Cells	3033		tumour: Stain 1 0+ Cells	3885		tumour: Stain 1 0+ Cells	4181		tumour: Stain 1 0+ Cells	2577		tumour: Stain 1 0+ Cells	3223
		tumour: Stain 1 1+ Cells	2552		tumour: Stain 1 1+ Cells	863		tumour: Stain 1 1+ Cells	958		tumour: Stain 1 1+ Cells	1158		tumour: Stain 1 1+ Cells	1582		tumour: Stain 1 1+ Cells	702		tumour: Stain 1 1+ Cells	1978		tumour: Stain 1 1+ Cells	1577
		tumour: Stain 1 2+ Cells	5105		tumour: Stain 1 2+ Cells	1697		tumour: Stain 1 2+ Cells	1668		tumour: Stain 1 2+ Cells	1665		tumour: Stain 1 2+ Cells	3760		tumour: Stain 1 2+ Cells	800		tumour: Stain 1 2+ Cells	3190		tumour: Stain 1 2+ Cells	1927
		tumour: Stain 1 3+ Cells	4397		tumour: Stain 1 3+ Cells	1837		tumour: Stain 1 3+ Cells	1201		tumour: Stain 1 3+ Cells	1321		tumour: Stain 1 3+ Cells	3681		tumour: Stain 1 3+ Cells	709		tumour: Stain 1 3+ Cells	2554		tumour: Stain 1 3+ Cells	1460
		tumour: Stain 2 Positive Cells	0		tumour: Stain 2 Positive Cells	0		tumour: Stain 2 Positive Cells	0		tumour: Stain 2 Positive Cells	0		tumour: Stain 2 Positive Cells	0		tumour: Stain 2 Positive Cells	0		tumour: Stain 2 Positive Cells	0		tumour: Stain 2 Positive Cells	0
		tumour: Stain 2 0+ Cells	16656		tumour: Stain 2 0+ Cells	7268		tumour: Stain 2 0+ Cells	7047		tumour: Stain 2 0+ Cells	7177		tumour: Stain 2 0+ Cells	12908		tumour: Stain 2 0+ Cells	6392		tumour: Stain 2 0+ Cells	10299		tumour: Stain 2 0+ Cells	8187
		tumour: Stain 2 1+ Cells	0		tumour: Stain 2 1+ Cells	0		tumour: Stain 2 1+ Cells	0		tumour: Stain 2 1+ Cells	0		tumour: Stain 2 1+ Cells	0		tumour: Stain 2 1+ Cells	0		tumour: Stain 2 1+ Cells	0		tumour: Stain 2 1+ Cells	0
		tumour: Stain 2 2+ Cells	0		tumour: Stain 2 2+ Cells	0		tumour: Stain 2 2+ Cells	0		tumour: Stain 2 2+ Cells	0		tumour: Stain 2 2+ Cells	0		tumour: Stain 2 2+ Cells	0		tumour: Stain 2 2+ Cells	0		tumour: Stain 2 2+ Cells	0
		tumour: Stain 2 3+ Cells	0		tumour: Stain 2 3+ Cells	0		tumour: Stain 2 3+ Cells	0		tumour: Stain 2 3+ Cells	0		tumour: Stain 2 3+ Cells	0		tumour: Stain 2 3+ Cells	0		tumour: Stain 2 3+ Cells	0		tumour: Stain 2 3+ Cells	0
		tumour: Dual Positive Cells	0		tumour: Dual Positive Cells	0		tumour: Dual Positive Cells	0		tumour: Dual Positive Cells	0		tumour: Dual Positive Cells	0		tumour: Dual Positive Cells	0		tumour: Dual Positive Cells	0		tumour: Dual Positive Cells	0
		tumour: Dual Negative Cells	4602		tumour: Dual Negative Cells	2871		tumour: Dual Negative Cells	3220		tumour: Dual Negative Cells	3033		tumour: Dual Negative Cells	3885		tumour: Dual Negative Cells	4181		tumour: Dual Negative Cells	2577		tumour: Dual Negative Cells	3223
		tumour: % Stain 1 Positive Cells	72.3703		tumour: % Stain 1 Positive Cells	60.4981		tumour: % Stain 1 Positive Cells	54.3068		tumour: % Stain 1 Positive Cells	57.74		tumour: % Stain 1 Positive Cells	69.9024		tumour: % Stain 1 Positive Cells	34.5901		tumour: % Stain 1 Positive Cells	74.9782		tumour: % Stain 1 Positive Cells	60.6327
		tumour: % Stain 1 0+ Cells	27.6297		tumour: % Stain 1 0+ Cells	39.5019		tumour: % Stain 1 0+ Cells	45.6932		tumour: % Stain 1 0+ Cells	42.26		tumour: % Stain 1 0+ Cells	30.0976		tumour: % Stain 1 0+ Cells	65.4099		tumour: % Stain 1 0+ Cells	25.0218		tumour: % Stain 1 0+ Cells	39.3673
		tumour: % Stain 1 1+ Cells	15.3218		tumour: % Stain 1 1+ Cells	11.874		tumour: % Stain 1 1+ Cells	13.5944		tumour: % Stain 1 1+ Cells	16.1349		tumour: % Stain 1 1+ Cells	12.256		tumour: % Stain 1 1+ Cells	10.9825		tumour: % Stain 1 1+ Cells	19.2057		tumour: % Stain 1 1+ Cells	19.2622
		tumour: % Stain 1 2+ Cells	30.6496		tumour: % Stain 1 2+ Cells	23.3489		tumour: % Stain 1 2+ Cells	23.6696		tumour: % Stain 1 2+ Cells	23.1991		tumour: % Stain 1 2+ Cells	29.1292		tumour: % Stain 1 2+ Cells	12.5156		tumour: % Stain 1 2+ Cells	30.9739		tumour: % Stain 1 2+ Cells	23.5373
		tumour: % Stain 1 3+ Cells	26.3989		tumour: % Stain 1 3+ Cells	25.2752		tumour: % Stain 1 3+ Cells	17.0427		tumour: % Stain 1 3+ Cells	18.406		tumour: % Stain 1 3+ Cells	28.5172		tumour: % Stain 1 3+ Cells	11.092		tumour: % Stain 1 3+ Cells	24.7985		tumour: % Stain 1 3+ Cells	17.8332
		tumour: Stain 1 H-Score	155.818		tumour: Stain 1 H-Score	134.397		tumour: Stain 1 H-Score	112.062		tumour: Stain 1 H-Score	117.751		tumour: Stain 1 H-Score	156.066		tumour: Stain 1 H-Score	69.2897		tumour: Stain 1 H-Score	155.549		tumour: Stain 1 H-Score	119.836
		tumour: % Stain 2 Positive Cells	0		tumour: % Stain 2 Positive Cells	0		tumour: % Stain 2 Positive Cells	0		tumour: % Stain 2 Positive Cells	0		tumour: % Stain 2 Positive Cells	0		tumour: % Stain 2 Positive Cells	0		tumour: % Stain 2 Positive Cells	0		tumour: % Stain 2 Positive Cells	0
		tumour: % Stain 2 0+ Cells	100		tumour: % Stain 2 0+ Cells	100		tumour: % Stain 2 0+ Cells	100		tumour: % Stain 2 0+ Cells	100		tumour: % Stain 2 0+ Cells	100		tumour: % Stain 2 0+ Cells	100		tumour: % Stain 2 0+ Cells	100		tumour: % Stain 2 0+ Cells	100
		tumour: % Stain 2 1+ Cells	0		tumour: % Stain 2 1+ Cells	0		tumour: % Stain 2 1+ Cells	0		tumour: % Stain 2 1+ Cells	0		tumour: % Stain 2 1+ Cells	0		tumour: % Stain 2 1+ Cells	0		tumour: % Stain 2 1+ Cells	0		tumour: % Stain 2 1+ Cells	0
		tumour: % Stain 2 2+ Cells	0		tumour: % Stain 2 2+ Cells	0		tumour: % Stain 2 2+ Cells	0		tumour: % Stain 2 2+ Cells	0		tumour: % Stain 2 2+ Cells	0		tumour: % Stain 2 2+ Cells	0		tumour: % Stain 2 2+ Cells	0		tumour: % Stain 2 2+ Cells	0
		tumour: % Stain 2 3+ Cells	0		tumour: % Stain 2 3+ Cells	0		tumour: % Stain 2 3+ Cells	0		tumour: % Stain 2 3+ Cells	0		tumour: % Stain 2 3+ Cells	0		tumour: % Stain 2 3+ Cells	0		tumour: % Stain 2 3+ Cells	0		tumour: % Stain 2 3+ Cells	0
		tumour: Stain 2 H-Score	0		tumour: Stain 2 H-Score	0		tumour: Stain 2 H-Score	0		tumour: Stain 2 H-Score	0		tumour: Stain 2 H-Score	0		tumour: Stain 2 H-Score	0		tumour: Stain 2 H-Score	0		tumour: Stain 2 H-Score	0
		tumour: % Dual Positive Cells	0		tumour: % Dual Positive Cells	0		tumour: % Dual Positive Cells	0		tumour: % Dual Positive Cells	0		tumour: % Dual Positive Cells	0		tumour: % Dual Positive Cells	0		tumour: % Dual Positive Cells	0		tumour: % Dual Positive Cells	0
		tumour: % Dual Negative Cells	27.6297		tumour: % Dual Negative Cells	39.5019		tumour: % Dual Negative Cells	45.6932		tumour: % Dual Negative Cells	42.26		tumour: % Dual Negative Cells	30.0976		tumour: % Dual Negative Cells	65.4099		tumour: % Dual Negative Cells	25.0218		tumour: % Dual Negative Cells	39.3673
		tumour: Avg Stain 1 Nuclear OD	0.355966		tumour: Avg Stain 1 Nuclear OD	0.317905		tumour: Avg Stain 1 Nuclear OD	0.2613		tumour: Avg Stain 1 Nuclear OD	0.274193		tumour: Avg Stain 1 Nuclear OD	0.359744		tumour: Avg Stain 1 Nuclear OD	0.174686		tumour: Avg Stain 1 Nuclear OD	0.351852		tumour: Avg Stain 1 Nuclear OD	0.280624
		tumour: Avg Stain 2 Nuclear OD	0.0537812		tumour: Avg Stain 2 Nuclear OD	0.0554825		tumour: Avg Stain 2 Nuclear OD	0.0490023		tumour: Avg Stain 2 Nuclear OD	0.0499121		tumour: Avg Stain 2 Nuclear OD	0.0583703		tumour: Avg Stain 2 Nuclear OD	0.04593		tumour: Avg Stain 2 Nuclear OD	0.0548024		tumour: Avg Stain 2 Nuclear OD	0.0499299
		tumour: Avg Stain 1 Cytoplasmic OD	0.100596		tumour: Avg Stain 1 Cytoplasmic OD	0.0836469		tumour: Avg Stain 1 Cytoplasmic OD	0.0768213		tumour: Avg Stain 1 Cytoplasmic OD	0.0766373		tumour: Avg Stain 1 Cytoplasmic OD	0.0943253		tumour: Avg Stain 1 Cytoplasmic OD	0.0541254		tumour: Avg Stain 1 Cytoplasmic OD	0.0932499		tumour: Avg Stain 1 Cytoplasmic OD	0.0749947
		tumour: Avg Stain 2 Cytoplasmic OD	0.0324639		tumour: Avg Stain 2 Cytoplasmic OD	0.0324308		tumour: Avg Stain 2 Cytoplasmic OD	0.0323134		tumour: Avg Stain 2 Cytoplasmic OD	0.0322208		tumour: Avg Stain 2 Cytoplasmic OD	0.0325271		tumour: Avg Stain 2 Cytoplasmic OD	0.032326		tumour: Avg Stain 2 Cytoplasmic OD	0.0326394		tumour: Avg Stain 2 Cytoplasmic OD	0.0323538
		tumour: Avg Cell Area (µm²)	100.448		tumour: Avg Cell Area (µm²)	100.107		tumour: Avg Cell Area (µm²)	94.1343		tumour: Avg Cell Area (µm²)	100.376		tumour: Avg Cell Area (µm²)	95.8692		tumour: Avg Cell Area (µm²)	99.842		tumour: Avg Cell Area (µm²)	108.015		tumour: Avg Cell Area (µm²)	103.687
		tumour: Avg Cytoplasm Area (µm²)	71.1049		tumour: Avg Cytoplasm Area (µm²)	73.7331		tumour: Avg Cytoplasm Area (µm²)	70.7883		tumour: Avg Cytoplasm Area (µm²)	75.7987		tumour: Avg Cytoplasm Area (µm²)	69.8617		tumour: Avg Cytoplasm Area (µm²)	78.9297		tumour: Avg Cytoplasm Area (µm²)	77.8023		tumour: Avg Cytoplasm Area (µm²)	77.7793
		tumour: Avg Nucleus Area (µm²)	29.3426		tumour: Avg Nucleus Area (µm²)	26.374		tumour: Avg Nucleus Area (µm²)	23.346		tumour: Avg Nucleus Area (µm²)	24.5773		tumour: Avg Nucleus Area (µm²)	26.0075		tumour: Avg Nucleus Area (µm²)	20.9122		tumour: Avg Nucleus Area (µm²)	30.2123		tumour: Avg Nucleus Area (µm²)	25.9074
		tumour: Avg Nucleus Perimeter (µm)	11.5281		tumour: Avg Nucleus Perimeter (µm)	10.3915		tumour: Avg Nucleus Perimeter (µm)	9.25343		tumour: Avg Nucleus Perimeter (µm)	9.72219		tumour: Avg Nucleus Perimeter (µm)	10.2969		tumour: Avg Nucleus Perimeter (µm)	8.29139		tumour: Avg Nucleus Perimeter (µm)	11.7875		tumour: Avg Nucleus Perimeter (µm)	10.1921
		tumour: Avg Nucleus Roundness	0.689309		tumour: Avg Nucleus Roundness	0.693465		tumour: Avg Nucleus Roundness	0.693922		tumour: Avg Nucleus Roundness	0.698765		tumour: Avg Nucleus Roundness	0.690882		tumour: Avg Nucleus Roundness	0.701957		tumour: Avg Nucleus Roundness	0.69573		tumour: Avg Nucleus Roundness	0.698021
		tumour: Tissue Area (µm²)	3289040		tumour: Tissue Area (µm²)	1534890		tumour: Tissue Area (µm²)	1397070		tumour: Tissue Area (µm²)	1632270		tumour: Tissue Area (µm²)	2541710		tumour: Tissue Area (µm²)	1565420		tumour: Tissue Area (µm²)	2330860		tumour: Tissue Area (µm²)	1832850
		BSNA1.2a	WT
		Name	Value		Name	Value		Name	Value		Name	Value		Name	Value		Name	Value		Name	Value		Name	Value
		Classified Area (mm²)	1.90403		Classified Area (mm²)	1.93357		Classified Area (mm²)	1.48837		Classified Area (mm²)	0.88732		Classified Area (mm²)	1.56116		Classified Area (mm²)	1.64148		Classified Area (mm²)	1.16936		Classified Area (mm²)	2.11375
		tumour Area (mm²)	1.76777		tumour Area (mm²)	1.76074		tumour Area (mm²)	1.36202		tumour Area (mm²)	0.84298		tumour Area (mm²)	1.30221		tumour Area (mm²)	1.62162		tumour Area (mm²)	1.12324		tumour Area (mm²)	1.83273
		empty Area (mm²)	0.00716		empty Area (mm²)	0.01589		empty Area (mm²)	0.00108		empty Area (mm²)	0.00074		empty Area (mm²)	0.02584		empty Area (mm²)	0.00683		empty Area (mm²)	0.00107		empty Area (mm²)	0.02652
		necrosis Area (mm²)	0.01139		necrosis Area (mm²)	0.12058		necrosis Area (mm²)	0.01984		necrosis Area (mm²)	0.01035		necrosis Area (mm²)	0.22852		necrosis Area (mm²)	0.00788		necrosis Area (mm²)	0.03254		necrosis Area (mm²)	0.24854
		normal Area (mm²)	0.1177		normal Area (mm²)	0.03636		normal Area (mm²)	0.10544		normal Area (mm²)	0.03325		normal Area (mm²)	0.0046		normal Area (mm²)	0.00516		normal Area (mm²)	0.01251		normal Area (mm²)	0.00595
		Total Cells	6065		Total Cells	6299		Total Cells	5520		Total Cells	3395		Total Cells	4383		Total Cells	6478		Total Cells	4146		Total Cells	6478
		Stain 1 Positive Cells	1465		Stain 1 Positive Cells	796		Stain 1 Positive Cells	606		Stain 1 Positive Cells	480		Stain 1 Positive Cells	332		Stain 1 Positive Cells	2648		Stain 1 Positive Cells	424		Stain 1 Positive Cells	500
		Stain 1 0+ Cells	4600		Stain 1 0+ Cells	5503		Stain 1 0+ Cells	4914		Stain 1 0+ Cells	2915		Stain 1 0+ Cells	4051		Stain 1 0+ Cells	3830		Stain 1 0+ Cells	3722		Stain 1 0+ Cells	5978
		Stain 1 1+ Cells	549		Stain 1 1+ Cells	308		Stain 1 1+ Cells	313		Stain 1 1+ Cells	182		Stain 1 1+ Cells	126		Stain 1 1+ Cells	791		Stain 1 1+ Cells	202		Stain 1 1+ Cells	165
		Stain 1 2+ Cells	497		Stain 1 2+ Cells	289		Stain 1 2+ Cells	188		Stain 1 2+ Cells	172		Stain 1 2+ Cells	122		Stain 1 2+ Cells	909		Stain 1 2+ Cells	144		Stain 1 2+ Cells	199
		Stain 1 3+ Cells	419		Stain 1 3+ Cells	199		Stain 1 3+ Cells	105		Stain 1 3+ Cells	126		Stain 1 3+ Cells	84		Stain 1 3+ Cells	948		Stain 1 3+ Cells	78		Stain 1 3+ Cells	136
		Stain 2 Positive Cells	0		Stain 2 Positive Cells	0		Stain 2 Positive Cells	0		Stain 2 Positive Cells	0		Stain 2 Positive Cells	0		Stain 2 Positive Cells	0		Stain 2 Positive Cells	0		Stain 2 Positive Cells	0
		Stain 2 0+ Cells	6065		Stain 2 0+ Cells	6299		Stain 2 0+ Cells	5520		Stain 2 0+ Cells	3395		Stain 2 0+ Cells	4383		Stain 2 0+ Cells	6478		Stain 2 0+ Cells	4146		Stain 2 0+ Cells	6478
		Stain 2 1+ Cells	0		Stain 2 1+ Cells	0		Stain 2 1+ Cells	0		Stain 2 1+ Cells	0		Stain 2 1+ Cells	0		Stain 2 1+ Cells	0		Stain 2 1+ Cells	0		Stain 2 1+ Cells	0
		Stain 2 2+ Cells	0		Stain 2 2+ Cells	0		Stain 2 2+ Cells	0		Stain 2 2+ Cells	0		Stain 2 2+ Cells	0		Stain 2 2+ Cells	0		Stain 2 2+ Cells	0		Stain 2 2+ Cells	0
		Stain 2 3+ Cells	0		Stain 2 3+ Cells	0		Stain 2 3+ Cells	0		Stain 2 3+ Cells	0		Stain 2 3+ Cells	0		Stain 2 3+ Cells	0		Stain 2 3+ Cells	0		Stain 2 3+ Cells	0
		Dual Positive Cells	0		Dual Positive Cells	0		Dual Positive Cells	0		Dual Positive Cells	0		Dual Positive Cells	0		Dual Positive Cells	0		Dual Positive Cells	0		Dual Positive Cells	0
		Dual Negative Cells	4600		Dual Negative Cells	5503		Dual Negative Cells	4914		Dual Negative Cells	2915		Dual Negative Cells	4051		Dual Negative Cells	3830		Dual Negative Cells	3722		Dual Negative Cells	5978
		% Stain 1 Positive Cells	24.155		% Stain 1 Positive Cells	12.6369		% Stain 1 Positive Cells	10.9783		% Stain 1 Positive Cells	14.1384		% Stain 1 Positive Cells	7.57472		% Stain 1 Positive Cells	40.8768		% Stain 1 Positive Cells	10.2267		% Stain 1 Positive Cells	7.71843		16.0382
		% Stain 1 0+ Cells	75.845		% Stain 1 0+ Cells	87.3631		% Stain 1 0+ Cells	89.0217		% Stain 1 0+ Cells	85.8616		% Stain 1 0+ Cells	92.4253		% Stain 1 0+ Cells	59.1232		% Stain 1 0+ Cells	89.7733		% Stain 1 0+ Cells	92.2816
		% Stain 1 1+ Cells	9.05194		% Stain 1 1+ Cells	4.88967		% Stain 1 1+ Cells	5.67029		% Stain 1 1+ Cells	5.36082		% Stain 1 1+ Cells	2.87474		% Stain 1 1+ Cells	12.2106		% Stain 1 1+ Cells	4.87217		% Stain 1 1+ Cells	2.54708
		% Stain 1 2+ Cells	8.19456		% Stain 1 2+ Cells	4.58803		% Stain 1 2+ Cells	3.4058		% Stain 1 2+ Cells	5.06627		% Stain 1 2+ Cells	2.78348		% Stain 1 2+ Cells	14.0321		% Stain 1 2+ Cells	3.47323		% Stain 1 2+ Cells	3.07194
		% Stain 1 3+ Cells	6.90849		% Stain 1 3+ Cells	3.15923		% Stain 1 3+ Cells	1.90217		% Stain 1 3+ Cells	3.71134		% Stain 1 3+ Cells	1.9165		% Stain 1 3+ Cells	14.6341		% Stain 1 3+ Cells	1.88133		% Stain 1 3+ Cells	2.09941
		Stain 1 H-Score	46.1665		Stain 1 H-Score	23.5434		Stain 1 H-Score	18.1884		Stain 1 H-Score	26.6274		Stain 1 H-Score	14.1912		Stain 1 H-Score	84.1772		Stain 1 H-Score	17.4626		Stain 1 H-Score	14.9892
		% Stain 2 Positive Cells	0		% Stain 2 Positive Cells	0		% Stain 2 Positive Cells	0		% Stain 2 Positive Cells	0		% Stain 2 Positive Cells	0		% Stain 2 Positive Cells	0		% Stain 2 Positive Cells	0		% Stain 2 Positive Cells	0
		% Stain 2 0+ Cells	100		% Stain 2 0+ Cells	100		% Stain 2 0+ Cells	100		% Stain 2 0+ Cells	100		% Stain 2 0+ Cells	100		% Stain 2 0+ Cells	100		% Stain 2 0+ Cells	100		% Stain 2 0+ Cells	100
		% Stain 2 1+ Cells	0		% Stain 2 1+ Cells	0		% Stain 2 1+ Cells	0		% Stain 2 1+ Cells	0		% Stain 2 1+ Cells	0		% Stain 2 1+ Cells	0		% Stain 2 1+ Cells	0		% Stain 2 1+ Cells	0
		% Stain 2 2+ Cells	0		% Stain 2 2+ Cells	0		% Stain 2 2+ Cells	0		% Stain 2 2+ Cells	0		% Stain 2 2+ Cells	0		% Stain 2 2+ Cells	0		% Stain 2 2+ Cells	0		% Stain 2 2+ Cells	0
		% Stain 2 3+ Cells	0		% Stain 2 3+ Cells	0		% Stain 2 3+ Cells	0		% Stain 2 3+ Cells	0		% Stain 2 3+ Cells	0		% Stain 2 3+ Cells	0		% Stain 2 3+ Cells	0		% Stain 2 3+ Cells	0
		Stain 2 H-Score	0		Stain 2 H-Score	0		Stain 2 H-Score	0		Stain 2 H-Score	0		Stain 2 H-Score	0		Stain 2 H-Score	0		Stain 2 H-Score	0		Stain 2 H-Score	0
		% Dual Positive Cells	0		% Dual Positive Cells	0		% Dual Positive Cells	0		% Dual Positive Cells	0		% Dual Positive Cells	0		% Dual Positive Cells	0		% Dual Positive Cells	0		% Dual Positive Cells	0
		% Dual Negative Cells	75.845		% Dual Negative Cells	87.3631		% Dual Negative Cells	89.0217		% Dual Negative Cells	85.8616		% Dual Negative Cells	92.4253		% Dual Negative Cells	59.1232		% Dual Negative Cells	89.7733		% Dual Negative Cells	92.2816
		Avg Stain 1 Nuclear OD	0.124812		Avg Stain 1 Nuclear OD	0.076819		Avg Stain 1 Nuclear OD	0.0654626		Avg Stain 1 Nuclear OD	0.0844028		Avg Stain 1 Nuclear OD	0.056779		Avg Stain 1 Nuclear OD	0.209656		Avg Stain 1 Nuclear OD	0.062789		Avg Stain 1 Nuclear OD	0.058674
		Avg Stain 2 Nuclear OD	0.0425266		Avg Stain 2 Nuclear OD	0.0398361		Avg Stain 2 Nuclear OD	0.0379326		Avg Stain 2 Nuclear OD	0.0403607		Avg Stain 2 Nuclear OD	0.0400636		Avg Stain 2 Nuclear OD	0.0474721		Avg Stain 2 Nuclear OD	0.0383339		Avg Stain 2 Nuclear OD	0.0407844
		Avg Stain 1 Cytoplasmic OD	0.0445231		Avg Stain 1 Cytoplasmic OD	0.0373568		Avg Stain 1 Cytoplasmic OD	0.036973		Avg Stain 1 Cytoplasmic OD	0.0386135		Avg Stain 1 Cytoplasmic OD	0.0345469		Avg Stain 1 Cytoplasmic OD	0.0593958		Avg Stain 1 Cytoplasmic OD	0.0360748		Avg Stain 1 Cytoplasmic OD	0.0348122
		Avg Stain 2 Cytoplasmic OD	0.0324599		Avg Stain 2 Cytoplasmic OD	0.0326113		Avg Stain 2 Cytoplasmic OD	0.032101		Avg Stain 2 Cytoplasmic OD	0.0324874		Avg Stain 2 Cytoplasmic OD	0.032514		Avg Stain 2 Cytoplasmic OD	0.0323965		Avg Stain 2 Cytoplasmic OD	0.0320821		Avg Stain 2 Cytoplasmic OD	0.0326178
		Avg Cell Area (µm²)	96.2988		Avg Cell Area (µm²)	89.6698		Avg Cell Area (µm²)	94.5644		Avg Cell Area (µm²)	94.2729		Avg Cell Area (µm²)	88.4969		Avg Cell Area (µm²)	100.355		Avg Cell Area (µm²)	91.1192		Avg Cell Area (µm²)	85.7225
		Avg Cytoplasm Area (µm²)	75.0548		Avg Cytoplasm Area (µm²)	69.4781		Avg Cytoplasm Area (µm²)	73.2225		Avg Cytoplasm Area (µm²)	72.2585		Avg Cytoplasm Area (µm²)	66.3752		Avg Cytoplasm Area (µm²)	76.4388		Avg Cytoplasm Area (µm²)	70.4364		Avg Cytoplasm Area (µm²)	62.5678
		Avg Nucleus Area (µm²)	21.244		Avg Nucleus Area (µm²)	20.1917		Avg Nucleus Area (µm²)	21.3419		Avg Nucleus Area (µm²)	22.0144		Avg Nucleus Area (µm²)	22.1217		Avg Nucleus Area (µm²)	23.9163		Avg Nucleus Area (µm²)	20.6828		Avg Nucleus Area (µm²)	23.1547
		Avg Nucleus Perimeter (µm)	8.39508		Avg Nucleus Perimeter (µm)	8.00616		Avg Nucleus Perimeter (µm)	8.47537		Avg Nucleus Perimeter (µm)	8.71916		Avg Nucleus Perimeter (µm)	8.79188		Avg Nucleus Perimeter (µm)	9.40699		Avg Nucleus Perimeter (µm)	8.20984		Avg Nucleus Perimeter (µm)	9.18336
		Avg Nucleus Roundness	0.695681		Avg Nucleus Roundness	0.688348		Avg Nucleus Roundness	0.692533		Avg Nucleus Roundness	0.687877		Avg Nucleus Roundness	0.691011		Avg Nucleus Roundness	0.699513		Avg Nucleus Roundness	0.689528		Avg Nucleus Roundness	0.6817
		Tissue Area (µm²)	1400820		Tissue Area (µm²)	1239190		Tissue Area (µm²)	1164750		Tissue Area (µm²)	702277		Tissue Area (µm²)	718387		Tissue Area (µm²)	1472140		Tissue Area (µm²)	846960		Tissue Area (µm²)	1028180
		tumour: Total Cells	6065		tumour: Total Cells	6299		tumour: Total Cells	5520		tumour: Total Cells	3395		tumour: Total Cells	4383		tumour: Total Cells	6478		tumour: Total Cells	4146		tumour: Total Cells	6478
		tumour: Stain 1 Positive Cells	1465		tumour: Stain 1 Positive Cells	796		tumour: Stain 1 Positive Cells	606		tumour: Stain 1 Positive Cells	480		tumour: Stain 1 Positive Cells	332		tumour: Stain 1 Positive Cells	2648		tumour: Stain 1 Positive Cells	424		tumour: Stain 1 Positive Cells	500
		tumour: Stain 1 0+ Cells	4600		tumour: Stain 1 0+ Cells	5503		tumour: Stain 1 0+ Cells	4914		tumour: Stain 1 0+ Cells	2915		tumour: Stain 1 0+ Cells	4051		tumour: Stain 1 0+ Cells	3830		tumour: Stain 1 0+ Cells	3722		tumour: Stain 1 0+ Cells	5978
		tumour: Stain 1 1+ Cells	549		tumour: Stain 1 1+ Cells	308		tumour: Stain 1 1+ Cells	313		tumour: Stain 1 1+ Cells	182		tumour: Stain 1 1+ Cells	126		tumour: Stain 1 1+ Cells	791		tumour: Stain 1 1+ Cells	202		tumour: Stain 1 1+ Cells	165
		tumour: Stain 1 2+ Cells	497		tumour: Stain 1 2+ Cells	289		tumour: Stain 1 2+ Cells	188		tumour: Stain 1 2+ Cells	172		tumour: Stain 1 2+ Cells	122		tumour: Stain 1 2+ Cells	909		tumour: Stain 1 2+ Cells	144		tumour: Stain 1 2+ Cells	199
		tumour: Stain 1 3+ Cells	419		tumour: Stain 1 3+ Cells	199		tumour: Stain 1 3+ Cells	105		tumour: Stain 1 3+ Cells	126		tumour: Stain 1 3+ Cells	84		tumour: Stain 1 3+ Cells	948		tumour: Stain 1 3+ Cells	78		tumour: Stain 1 3+ Cells	136
		tumour: Stain 2 Positive Cells	0		tumour: Stain 2 Positive Cells	0		tumour: Stain 2 Positive Cells	0		tumour: Stain 2 Positive Cells	0		tumour: Stain 2 Positive Cells	0		tumour: Stain 2 Positive Cells	0		tumour: Stain 2 Positive Cells	0		tumour: Stain 2 Positive Cells	0
		tumour: Stain 2 0+ Cells	6065		tumour: Stain 2 0+ Cells	6299		tumour: Stain 2 0+ Cells	5520		tumour: Stain 2 0+ Cells	3395		tumour: Stain 2 0+ Cells	4383		tumour: Stain 2 0+ Cells	6478		tumour: Stain 2 0+ Cells	4146		tumour: Stain 2 0+ Cells	6478
		tumour: Stain 2 1+ Cells	0		tumour: Stain 2 1+ Cells	0		tumour: Stain 2 1+ Cells	0		tumour: Stain 2 1+ Cells	0		tumour: Stain 2 1+ Cells	0		tumour: Stain 2 1+ Cells	0		tumour: Stain 2 1+ Cells	0		tumour: Stain 2 1+ Cells	0
		tumour: Stain 2 2+ Cells	0		tumour: Stain 2 2+ Cells	0		tumour: Stain 2 2+ Cells	0		tumour: Stain 2 2+ Cells	0		tumour: Stain 2 2+ Cells	0		tumour: Stain 2 2+ Cells	0		tumour: Stain 2 2+ Cells	0		tumour: Stain 2 2+ Cells	0
		tumour: Stain 2 3+ Cells	0		tumour: Stain 2 3+ Cells	0		tumour: Stain 2 3+ Cells	0		tumour: Stain 2 3+ Cells	0		tumour: Stain 2 3+ Cells	0		tumour: Stain 2 3+ Cells	0		tumour: Stain 2 3+ Cells	0		tumour: Stain 2 3+ Cells	0
		tumour: Dual Positive Cells	0		tumour: Dual Positive Cells	0		tumour: Dual Positive Cells	0		tumour: Dual Positive Cells	0		tumour: Dual Positive Cells	0		tumour: Dual Positive Cells	0		tumour: Dual Positive Cells	0		tumour: Dual Positive Cells	0
		tumour: Dual Negative Cells	4600		tumour: Dual Negative Cells	5503		tumour: Dual Negative Cells	4914		tumour: Dual Negative Cells	2915		tumour: Dual Negative Cells	4051		tumour: Dual Negative Cells	3830		tumour: Dual Negative Cells	3722		tumour: Dual Negative Cells	5978
		tumour: % Stain 1 Positive Cells	24.155		tumour: % Stain 1 Positive Cells	12.6369		tumour: % Stain 1 Positive Cells	10.9783		tumour: % Stain 1 Positive Cells	14.1384		tumour: % Stain 1 Positive Cells	7.57472		tumour: % Stain 1 Positive Cells	40.8768		tumour: % Stain 1 Positive Cells	10.2267		tumour: % Stain 1 Positive Cells	7.71843
		tumour: % Stain 1 0+ Cells	75.845		tumour: % Stain 1 0+ Cells	87.3631		tumour: % Stain 1 0+ Cells	89.0217		tumour: % Stain 1 0+ Cells	85.8616		tumour: % Stain 1 0+ Cells	92.4253		tumour: % Stain 1 0+ Cells	59.1232		tumour: % Stain 1 0+ Cells	89.7733		tumour: % Stain 1 0+ Cells	92.2816
		tumour: % Stain 1 1+ Cells	9.05194		tumour: % Stain 1 1+ Cells	4.88967		tumour: % Stain 1 1+ Cells	5.67029		tumour: % Stain 1 1+ Cells	5.36082		tumour: % Stain 1 1+ Cells	2.87474		tumour: % Stain 1 1+ Cells	12.2106		tumour: % Stain 1 1+ Cells	4.87217		tumour: % Stain 1 1+ Cells	2.54708
		tumour: % Stain 1 2+ Cells	8.19456		tumour: % Stain 1 2+ Cells	4.58803		tumour: % Stain 1 2+ Cells	3.4058		tumour: % Stain 1 2+ Cells	5.06627		tumour: % Stain 1 2+ Cells	2.78348		tumour: % Stain 1 2+ Cells	14.0321		tumour: % Stain 1 2+ Cells	3.47323		tumour: % Stain 1 2+ Cells	3.07194
		tumour: % Stain 1 3+ Cells	6.90849		tumour: % Stain 1 3+ Cells	3.15923		tumour: % Stain 1 3+ Cells	1.90217		tumour: % Stain 1 3+ Cells	3.71134		tumour: % Stain 1 3+ Cells	1.9165		tumour: % Stain 1 3+ Cells	14.6341		tumour: % Stain 1 3+ Cells	1.88133		tumour: % Stain 1 3+ Cells	2.09941
		tumour: Stain 1 H-Score	46.1665		tumour: Stain 1 H-Score	23.5434		tumour: Stain 1 H-Score	18.1884		tumour: Stain 1 H-Score	26.6274		tumour: Stain 1 H-Score	14.1912		tumour: Stain 1 H-Score	84.1772		tumour: Stain 1 H-Score	17.4626		tumour: Stain 1 H-Score	14.9892
		tumour: % Stain 2 Positive Cells	0		tumour: % Stain 2 Positive Cells	0		tumour: % Stain 2 Positive Cells	0		tumour: % Stain 2 Positive Cells	0		tumour: % Stain 2 Positive Cells	0		tumour: % Stain 2 Positive Cells	0		tumour: % Stain 2 Positive Cells	0		tumour: % Stain 2 Positive Cells	0
		tumour: % Stain 2 0+ Cells	100		tumour: % Stain 2 0+ Cells	100		tumour: % Stain 2 0+ Cells	100		tumour: % Stain 2 0+ Cells	100		tumour: % Stain 2 0+ Cells	100		tumour: % Stain 2 0+ Cells	100		tumour: % Stain 2 0+ Cells	100		tumour: % Stain 2 0+ Cells	100
		tumour: % Stain 2 1+ Cells	0		tumour: % Stain 2 1+ Cells	0		tumour: % Stain 2 1+ Cells	0		tumour: % Stain 2 1+ Cells	0		tumour: % Stain 2 1+ Cells	0		tumour: % Stain 2 1+ Cells	0		tumour: % Stain 2 1+ Cells	0		tumour: % Stain 2 1+ Cells	0
		tumour: % Stain 2 2+ Cells	0		tumour: % Stain 2 2+ Cells	0		tumour: % Stain 2 2+ Cells	0		tumour: % Stain 2 2+ Cells	0		tumour: % Stain 2 2+ Cells	0		tumour: % Stain 2 2+ Cells	0		tumour: % Stain 2 2+ Cells	0		tumour: % Stain 2 2+ Cells	0
		tumour: % Stain 2 3+ Cells	0		tumour: % Stain 2 3+ Cells	0		tumour: % Stain 2 3+ Cells	0		tumour: % Stain 2 3+ Cells	0		tumour: % Stain 2 3+ Cells	0		tumour: % Stain 2 3+ Cells	0		tumour: % Stain 2 3+ Cells	0		tumour: % Stain 2 3+ Cells	0
		tumour: Stain 2 H-Score	0		tumour: Stain 2 H-Score	0		tumour: Stain 2 H-Score	0		tumour: Stain 2 H-Score	0		tumour: Stain 2 H-Score	0		tumour: Stain 2 H-Score	0		tumour: Stain 2 H-Score	0		tumour: Stain 2 H-Score	0
		tumour: % Dual Positive Cells	0		tumour: % Dual Positive Cells	0		tumour: % Dual Positive Cells	0		tumour: % Dual Positive Cells	0		tumour: % Dual Positive Cells	0		tumour: % Dual Positive Cells	0		tumour: % Dual Positive Cells	0		tumour: % Dual Positive Cells	0
		tumour: % Dual Negative Cells	75.845		tumour: % Dual Negative Cells	87.3631		tumour: % Dual Negative Cells	89.0217		tumour: % Dual Negative Cells	85.8616		tumour: % Dual Negative Cells	92.4253		tumour: % Dual Negative Cells	59.1232		tumour: % Dual Negative Cells	89.7733		tumour: % Dual Negative Cells	92.2816
		tumour: Avg Stain 1 Nuclear OD	0.124812		tumour: Avg Stain 1 Nuclear OD	0.076819		tumour: Avg Stain 1 Nuclear OD	0.0654626		tumour: Avg Stain 1 Nuclear OD	0.0844028		tumour: Avg Stain 1 Nuclear OD	0.056779		tumour: Avg Stain 1 Nuclear OD	0.209656		tumour: Avg Stain 1 Nuclear OD	0.062789		tumour: Avg Stain 1 Nuclear OD	0.058674
		tumour: Avg Stain 2 Nuclear OD	0.0425266		tumour: Avg Stain 2 Nuclear OD	0.0398361		tumour: Avg Stain 2 Nuclear OD	0.0379326		tumour: Avg Stain 2 Nuclear OD	0.0403607		tumour: Avg Stain 2 Nuclear OD	0.0400636		tumour: Avg Stain 2 Nuclear OD	0.0474721		tumour: Avg Stain 2 Nuclear OD	0.0383339		tumour: Avg Stain 2 Nuclear OD	0.0407844
		tumour: Avg Stain 1 Cytoplasmic OD	0.0445231		tumour: Avg Stain 1 Cytoplasmic OD	0.0373568		tumour: Avg Stain 1 Cytoplasmic OD	0.036973		tumour: Avg Stain 1 Cytoplasmic OD	0.0386135		tumour: Avg Stain 1 Cytoplasmic OD	0.0345469		tumour: Avg Stain 1 Cytoplasmic OD	0.0593958		tumour: Avg Stain 1 Cytoplasmic OD	0.0360748		tumour: Avg Stain 1 Cytoplasmic OD	0.0348122
		tumour: Avg Stain 2 Cytoplasmic OD	0.0324599		tumour: Avg Stain 2 Cytoplasmic OD	0.0326113		tumour: Avg Stain 2 Cytoplasmic OD	0.032101		tumour: Avg Stain 2 Cytoplasmic OD	0.0324874		tumour: Avg Stain 2 Cytoplasmic OD	0.032514		tumour: Avg Stain 2 Cytoplasmic OD	0.0323965		tumour: Avg Stain 2 Cytoplasmic OD	0.0320821		tumour: Avg Stain 2 Cytoplasmic OD	0.0326178
		tumour: Avg Cell Area (µm²)	96.2988		tumour: Avg Cell Area (µm²)	89.6698		tumour: Avg Cell Area (µm²)	94.5644		tumour: Avg Cell Area (µm²)	94.2729		tumour: Avg Cell Area (µm²)	88.4969		tumour: Avg Cell Area (µm²)	100.355		tumour: Avg Cell Area (µm²)	91.1192		tumour: Avg Cell Area (µm²)	85.7225
		tumour: Avg Cytoplasm Area (µm²)	75.0548		tumour: Avg Cytoplasm Area (µm²)	69.4781		tumour: Avg Cytoplasm Area (µm²)	73.2225		tumour: Avg Cytoplasm Area (µm²)	72.2585		tumour: Avg Cytoplasm Area (µm²)	66.3752		tumour: Avg Cytoplasm Area (µm²)	76.4388		tumour: Avg Cytoplasm Area (µm²)	70.4364		tumour: Avg Cytoplasm Area (µm²)	62.5678
		tumour: Avg Nucleus Area (µm²)	21.244		tumour: Avg Nucleus Area (µm²)	20.1917		tumour: Avg Nucleus Area (µm²)	21.3419		tumour: Avg Nucleus Area (µm²)	22.0144		tumour: Avg Nucleus Area (µm²)	22.1217		tumour: Avg Nucleus Area (µm²)	23.9163		tumour: Avg Nucleus Area (µm²)	20.6828		tumour: Avg Nucleus Area (µm²)	23.1547
		tumour: Avg Nucleus Perimeter (µm)	8.39508		tumour: Avg Nucleus Perimeter (µm)	8.00616		tumour: Avg Nucleus Perimeter (µm)	8.47537		tumour: Avg Nucleus Perimeter (µm)	8.71916		tumour: Avg Nucleus Perimeter (µm)	8.79188		tumour: Avg Nucleus Perimeter (µm)	9.40699		tumour: Avg Nucleus Perimeter (µm)	8.20984		tumour: Avg Nucleus Perimeter (µm)	9.18336
		tumour: Avg Nucleus Roundness	0.695681		tumour: Avg Nucleus Roundness	0.688348		tumour: Avg Nucleus Roundness	0.692533		tumour: Avg Nucleus Roundness	0.687877		tumour: Avg Nucleus Roundness	0.691011		tumour: Avg Nucleus Roundness	0.699513		tumour: Avg Nucleus Roundness	0.689528		tumour: Avg Nucleus Roundness	0.6817
		tumour: Tissue Area (µm²)	1400820		tumour: Tissue Area (µm²)	1239190		tumour: Tissue Area (µm²)	1164750		tumour: Tissue Area (µm²)	702277		tumour: Tissue Area (µm²)	718387		tumour: Tissue Area (µm²)	1472140		tumour: Tissue Area (µm²)	846960		tumour: Tissue Area (µm²)	1028180
		BSNA34.2c	WT
		Name	Value		Name	Value		Name	Value		Name	Value		Name	Value		Name	Value		Name	Value		Name	Value
		Classified Area (mm²)	1.02458		Classified Area (mm²)	0.72036		Classified Area (mm²)	0.6787		Classified Area (mm²)	0.95568		Classified Area (mm²)	0.70164		Classified Area (mm²)	0.91557		Classified Area (mm²)	0.43322		Classified Area (mm²)	0.87138
		tumour Area (mm²)	1.02006		tumour Area (mm²)	0.71886		tumour Area (mm²)	0.64852		tumour Area (mm²)	0.9102		tumour Area (mm²)	0.70118		tumour Area (mm²)	0.9048		tumour Area (mm²)	0.43298		tumour Area (mm²)	0.84114
		empty Area (mm²)	0		empty Area (mm²)	0		empty Area (mm²)	0.00038		empty Area (mm²)	0.00012		empty Area (mm²)	0		empty Area (mm²)	0.00523		empty Area (mm²)	0		empty Area (mm²)	0
		necrosis Area (mm²)	0		necrosis Area (mm²)	0		necrosis Area (mm²)	0.0011		necrosis Area (mm²)	0.00039		necrosis Area (mm²)	0		necrosis Area (mm²)	0.00554		necrosis Area (mm²)	0		necrosis Area (mm²)	0.00015
		normal Area (mm²)	0.00452		normal Area (mm²)	0.0015		normal Area (mm²)	0.02868		normal Area (mm²)	0.04497		normal Area (mm²)	0.00047		normal Area (mm²)	0		normal Area (mm²)	0.00024		normal Area (mm²)	0.03008
		Total Cells	4372		Total Cells	3104		Total Cells	2288		Total Cells	3627		Total Cells	3350		Total Cells	3532		Total Cells	1958		Total Cells	3140
		Stain 1 Positive Cells	2219		Stain 1 Positive Cells	1850		Stain 1 Positive Cells	440		Stain 1 Positive Cells	812		Stain 1 Positive Cells	1691		Stain 1 Positive Cells	2156		Stain 1 Positive Cells	1140		Stain 1 Positive Cells	804
		Stain 1 0+ Cells	2153		Stain 1 0+ Cells	1254		Stain 1 0+ Cells	1848		Stain 1 0+ Cells	2815		Stain 1 0+ Cells	1659		Stain 1 0+ Cells	1376		Stain 1 0+ Cells	818		Stain 1 0+ Cells	2336
		Stain 1 1+ Cells	674		Stain 1 1+ Cells	467		Stain 1 1+ Cells	146		Stain 1 1+ Cells	259		Stain 1 1+ Cells	413		Stain 1 1+ Cells	589		Stain 1 1+ Cells	310		Stain 1 1+ Cells	316
		Stain 1 2+ Cells	887		Stain 1 2+ Cells	794		Stain 1 2+ Cells	146		Stain 1 2+ Cells	265		Stain 1 2+ Cells	724		Stain 1 2+ Cells	766		Stain 1 2+ Cells	476		Stain 1 2+ Cells	272
		Stain 1 3+ Cells	658		Stain 1 3+ Cells	589		Stain 1 3+ Cells	148		Stain 1 3+ Cells	288		Stain 1 3+ Cells	554		Stain 1 3+ Cells	801		Stain 1 3+ Cells	354		Stain 1 3+ Cells	216
		Stain 2 Positive Cells	0		Stain 2 Positive Cells	0		Stain 2 Positive Cells	0		Stain 2 Positive Cells	0		Stain 2 Positive Cells	0		Stain 2 Positive Cells	0		Stain 2 Positive Cells	0		Stain 2 Positive Cells	0
		Stain 2 0+ Cells	4372		Stain 2 0+ Cells	3104		Stain 2 0+ Cells	2288		Stain 2 0+ Cells	3627		Stain 2 0+ Cells	3350		Stain 2 0+ Cells	3532		Stain 2 0+ Cells	1958		Stain 2 0+ Cells	3140
		Stain 2 1+ Cells	0		Stain 2 1+ Cells	0		Stain 2 1+ Cells	0		Stain 2 1+ Cells	0		Stain 2 1+ Cells	0		Stain 2 1+ Cells	0		Stain 2 1+ Cells	0		Stain 2 1+ Cells	0
		Stain 2 2+ Cells	0		Stain 2 2+ Cells	0		Stain 2 2+ Cells	0		Stain 2 2+ Cells	0		Stain 2 2+ Cells	0		Stain 2 2+ Cells	0		Stain 2 2+ Cells	0		Stain 2 2+ Cells	0
		Stain 2 3+ Cells	0		Stain 2 3+ Cells	0		Stain 2 3+ Cells	0		Stain 2 3+ Cells	0		Stain 2 3+ Cells	0		Stain 2 3+ Cells	0		Stain 2 3+ Cells	0		Stain 2 3+ Cells	0
		Dual Positive Cells	0		Dual Positive Cells	0		Dual Positive Cells	0		Dual Positive Cells	0		Dual Positive Cells	0		Dual Positive Cells	0		Dual Positive Cells	0		Dual Positive Cells	0
		Dual Negative Cells	2153		Dual Negative Cells	1254		Dual Negative Cells	1848		Dual Negative Cells	2815		Dual Negative Cells	1659		Dual Negative Cells	1376		Dual Negative Cells	818		Dual Negative Cells	2336
		% Stain 1 Positive Cells	50.7548		% Stain 1 Positive Cells	59.6005		% Stain 1 Positive Cells	19.2308		% Stain 1 Positive Cells	22.3876		% Stain 1 Positive Cells	50.4776		% Stain 1 Positive Cells	61.0419		% Stain 1 Positive Cells	58.2227		% Stain 1 Positive Cells	25.6051		43.4151
		% Stain 1 0+ Cells	49.2452		% Stain 1 0+ Cells	40.3995		% Stain 1 0+ Cells	80.7692		% Stain 1 0+ Cells	77.6124		% Stain 1 0+ Cells	49.5224		% Stain 1 0+ Cells	38.9581		% Stain 1 0+ Cells	41.7773		% Stain 1 0+ Cells	74.3949
		% Stain 1 1+ Cells	15.4163		% Stain 1 1+ Cells	15.0451		% Stain 1 1+ Cells	6.38112		% Stain 1 1+ Cells	7.14089		% Stain 1 1+ Cells	12.3284		% Stain 1 1+ Cells	16.6761		% Stain 1 1+ Cells	15.8325		% Stain 1 1+ Cells	10.0637
		% Stain 1 2+ Cells	20.2882		% Stain 1 2+ Cells	25.5799		% Stain 1 2+ Cells	6.38112		% Stain 1 2+ Cells	7.30631		% Stain 1 2+ Cells	21.6119		% Stain 1 2+ Cells	21.6874		% Stain 1 2+ Cells	24.3105		% Stain 1 2+ Cells	8.66242
		% Stain 1 3+ Cells	15.0503		% Stain 1 3+ Cells	18.9755		% Stain 1 3+ Cells	6.46853		% Stain 1 3+ Cells	7.94045		% Stain 1 3+ Cells	16.5373		% Stain 1 3+ Cells	22.6784		% Stain 1 3+ Cells	18.0797		% Stain 1 3+ Cells	6.87898
		Stain 1 H-Score	101.144		Stain 1 H-Score	123.131		Stain 1 H-Score	38.549		Stain 1 H-Score	45.5749		Stain 1 H-Score	105.164		Stain 1 H-Score	128.086		Stain 1 H-Score	118.693		Stain 1 H-Score	48.0255
		% Stain 2 Positive Cells	0		% Stain 2 Positive Cells	0		% Stain 2 Positive Cells	0		% Stain 2 Positive Cells	0		% Stain 2 Positive Cells	0		% Stain 2 Positive Cells	0		% Stain 2 Positive Cells	0		% Stain 2 Positive Cells	0
		% Stain 2 0+ Cells	100		% Stain 2 0+ Cells	100		% Stain 2 0+ Cells	100		% Stain 2 0+ Cells	100		% Stain 2 0+ Cells	100		% Stain 2 0+ Cells	100		% Stain 2 0+ Cells	100		% Stain 2 0+ Cells	100
		% Stain 2 1+ Cells	0		% Stain 2 1+ Cells	0		% Stain 2 1+ Cells	0		% Stain 2 1+ Cells	0		% Stain 2 1+ Cells	0		% Stain 2 1+ Cells	0		% Stain 2 1+ Cells	0		% Stain 2 1+ Cells	0
		% Stain 2 2+ Cells	0		% Stain 2 2+ Cells	0		% Stain 2 2+ Cells	0		% Stain 2 2+ Cells	0		% Stain 2 2+ Cells	0		% Stain 2 2+ Cells	0		% Stain 2 2+ Cells	0		% Stain 2 2+ Cells	0
		% Stain 2 3+ Cells	0		% Stain 2 3+ Cells	0		% Stain 2 3+ Cells	0		% Stain 2 3+ Cells	0		% Stain 2 3+ Cells	0		% Stain 2 3+ Cells	0		% Stain 2 3+ Cells	0		% Stain 2 3+ Cells	0
		Stain 2 H-Score	0		Stain 2 H-Score	0		Stain 2 H-Score	0		Stain 2 H-Score	0		Stain 2 H-Score	0		Stain 2 H-Score	0		Stain 2 H-Score	0		Stain 2 H-Score	0
		% Dual Positive Cells	0		% Dual Positive Cells	0		% Dual Positive Cells	0		% Dual Positive Cells	0		% Dual Positive Cells	0		% Dual Positive Cells	0		% Dual Positive Cells	0		% Dual Positive Cells	0
		% Dual Negative Cells	49.2452		% Dual Negative Cells	40.3995		% Dual Negative Cells	80.7692		% Dual Negative Cells	77.6124		% Dual Negative Cells	49.5224		% Dual Negative Cells	38.9581		% Dual Negative Cells	41.7773		% Dual Negative Cells	74.3949
		Avg Stain 1 Nuclear OD	0.242139		Avg Stain 1 Nuclear OD	0.285942		Avg Stain 1 Nuclear OD	0.109915		Avg Stain 1 Nuclear OD	0.125566		Avg Stain 1 Nuclear OD	0.251948		Avg Stain 1 Nuclear OD	0.304355		Avg Stain 1 Nuclear OD	0.280076		Avg Stain 1 Nuclear OD	0.128595
		Avg Stain 2 Nuclear OD	0.0483354		Avg Stain 2 Nuclear OD	0.0518103		Avg Stain 2 Nuclear OD	0.0419132		Avg Stain 2 Nuclear OD	0.0437831		Avg Stain 2 Nuclear OD	0.0482427		Avg Stain 2 Nuclear OD	0.0538502		Avg Stain 2 Nuclear OD	0.0491213		Avg Stain 2 Nuclear OD	0.0423919
		Avg Stain 1 Cytoplasmic OD	0.067185		Avg Stain 1 Cytoplasmic OD	0.0747806		Avg Stain 1 Cytoplasmic OD	0.0417986		Avg Stain 1 Cytoplasmic OD	0.0448731		Avg Stain 1 Cytoplasmic OD	0.0757561		Avg Stain 1 Cytoplasmic OD	0.0771499		Avg Stain 1 Cytoplasmic OD	0.0783519		Avg Stain 1 Cytoplasmic OD	0.0472977
		Avg Stain 2 Cytoplasmic OD	0.0322123		Avg Stain 2 Cytoplasmic OD	0.0324167		Avg Stain 2 Cytoplasmic OD	0.0322668		Avg Stain 2 Cytoplasmic OD	0.0324331		Avg Stain 2 Cytoplasmic OD	0.0319688		Avg Stain 2 Cytoplasmic OD	0.0324478		Avg Stain 2 Cytoplasmic OD	0.0321066		Avg Stain 2 Cytoplasmic OD	0.0322976
		Avg Cell Area (µm²)	105.372		Avg Cell Area (µm²)	107.231		Avg Cell Area (µm²)	108.234		Avg Cell Area (µm²)	103.971		Avg Cell Area (µm²)	103.094		Avg Cell Area (µm²)	111.986		Avg Cell Area (µm²)	103.988		Avg Cell Area (µm²)	107.976
		Avg Cytoplasm Area (µm²)	78.87		Avg Cytoplasm Area (µm²)	79.0205		Avg Cytoplasm Area (µm²)	84.6275		Avg Cytoplasm Area (µm²)	79.4952		Avg Cytoplasm Area (µm²)	74.8699		Avg Cytoplasm Area (µm²)	82.8404		Avg Cytoplasm Area (µm²)	76.1611		Avg Cytoplasm Area (µm²)	83.9442
		Avg Nucleus Area (µm²)	26.5017		Avg Nucleus Area (µm²)	28.2108		Avg Nucleus Area (µm²)	23.6062		Avg Nucleus Area (µm²)	24.476		Avg Nucleus Area (µm²)	28.2237		Avg Nucleus Area (µm²)	29.1458		Avg Nucleus Area (µm²)	27.8271		Avg Nucleus Area (µm²)	24.0318
		Avg Nucleus Perimeter (µm)	10.3166		Avg Nucleus Perimeter (µm)	10.961		Avg Nucleus Perimeter (µm)	9.28066		Avg Nucleus Perimeter (µm)	9.58501		Avg Nucleus Perimeter (µm)	10.9466		Avg Nucleus Perimeter (µm)	11.1936		Avg Nucleus Perimeter (µm)	10.796		Avg Nucleus Perimeter (µm)	9.42885
		Avg Nucleus Roundness	0.69698		Avg Nucleus Roundness	0.697346		Avg Nucleus Roundness	0.702667		Avg Nucleus Roundness	0.698434		Avg Nucleus Roundness	0.691132		Avg Nucleus Roundness	0.70069		Avg Nucleus Roundness	0.693608		Avg Nucleus Roundness	0.701559
		Tissue Area (µm²)	1013600		Tissue Area (µm²)	718368		Tissue Area (µm²)	613477		Tissue Area (µm²)	859927		Tissue Area (µm²)	699570		Tissue Area (µm²)	878669		Tissue Area (µm²)	431172		Tissue Area (µm²)	820768
		tumour: Total Cells	4372		tumour: Total Cells	3104		tumour: Total Cells	2288		tumour: Total Cells	3627		tumour: Total Cells	3350		tumour: Total Cells	3532		tumour: Total Cells	1958		tumour: Total Cells	3140
		tumour: Stain 1 Positive Cells	2219		tumour: Stain 1 Positive Cells	1850		tumour: Stain 1 Positive Cells	440		tumour: Stain 1 Positive Cells	812		tumour: Stain 1 Positive Cells	1691		tumour: Stain 1 Positive Cells	2156		tumour: Stain 1 Positive Cells	1140		tumour: Stain 1 Positive Cells	804
		tumour: Stain 1 0+ Cells	2153		tumour: Stain 1 0+ Cells	1254		tumour: Stain 1 0+ Cells	1848		tumour: Stain 1 0+ Cells	2815		tumour: Stain 1 0+ Cells	1659		tumour: Stain 1 0+ Cells	1376		tumour: Stain 1 0+ Cells	818		tumour: Stain 1 0+ Cells	2336
		tumour: Stain 1 1+ Cells	674		tumour: Stain 1 1+ Cells	467		tumour: Stain 1 1+ Cells	146		tumour: Stain 1 1+ Cells	259		tumour: Stain 1 1+ Cells	413		tumour: Stain 1 1+ Cells	589		tumour: Stain 1 1+ Cells	310		tumour: Stain 1 1+ Cells	316
		tumour: Stain 1 2+ Cells	887		tumour: Stain 1 2+ Cells	794		tumour: Stain 1 2+ Cells	146		tumour: Stain 1 2+ Cells	265		tumour: Stain 1 2+ Cells	724		tumour: Stain 1 2+ Cells	766		tumour: Stain 1 2+ Cells	476		tumour: Stain 1 2+ Cells	272
		tumour: Stain 1 3+ Cells	658		tumour: Stain 1 3+ Cells	589		tumour: Stain 1 3+ Cells	148		tumour: Stain 1 3+ Cells	288		tumour: Stain 1 3+ Cells	554		tumour: Stain 1 3+ Cells	801		tumour: Stain 1 3+ Cells	354		tumour: Stain 1 3+ Cells	216
		tumour: Stain 2 Positive Cells	0		tumour: Stain 2 Positive Cells	0		tumour: Stain 2 Positive Cells	0		tumour: Stain 2 Positive Cells	0		tumour: Stain 2 Positive Cells	0		tumour: Stain 2 Positive Cells	0		tumour: Stain 2 Positive Cells	0		tumour: Stain 2 Positive Cells	0
		tumour: Stain 2 0+ Cells	4372		tumour: Stain 2 0+ Cells	3104		tumour: Stain 2 0+ Cells	2288		tumour: Stain 2 0+ Cells	3627		tumour: Stain 2 0+ Cells	3350		tumour: Stain 2 0+ Cells	3532		tumour: Stain 2 0+ Cells	1958		tumour: Stain 2 0+ Cells	3140
		tumour: Stain 2 1+ Cells	0		tumour: Stain 2 1+ Cells	0		tumour: Stain 2 1+ Cells	0		tumour: Stain 2 1+ Cells	0		tumour: Stain 2 1+ Cells	0		tumour: Stain 2 1+ Cells	0		tumour: Stain 2 1+ Cells	0		tumour: Stain 2 1+ Cells	0
		tumour: Stain 2 2+ Cells	0		tumour: Stain 2 2+ Cells	0		tumour: Stain 2 2+ Cells	0		tumour: Stain 2 2+ Cells	0		tumour: Stain 2 2+ Cells	0		tumour: Stain 2 2+ Cells	0		tumour: Stain 2 2+ Cells	0		tumour: Stain 2 2+ Cells	0
		tumour: Stain 2 3+ Cells	0		tumour: Stain 2 3+ Cells	0		tumour: Stain 2 3+ Cells	0		tumour: Stain 2 3+ Cells	0		tumour: Stain 2 3+ Cells	0		tumour: Stain 2 3+ Cells	0		tumour: Stain 2 3+ Cells	0		tumour: Stain 2 3+ Cells	0
		tumour: Dual Positive Cells	0		tumour: Dual Positive Cells	0		tumour: Dual Positive Cells	0		tumour: Dual Positive Cells	0		tumour: Dual Positive Cells	0		tumour: Dual Positive Cells	0		tumour: Dual Positive Cells	0		tumour: Dual Positive Cells	0
		tumour: Dual Negative Cells	2153		tumour: Dual Negative Cells	1254		tumour: Dual Negative Cells	1848		tumour: Dual Negative Cells	2815		tumour: Dual Negative Cells	1659		tumour: Dual Negative Cells	1376		tumour: Dual Negative Cells	818		tumour: Dual Negative Cells	2336
		tumour: % Stain 1 Positive Cells	50.7548		tumour: % Stain 1 Positive Cells	59.6005		tumour: % Stain 1 Positive Cells	19.2308		tumour: % Stain 1 Positive Cells	22.3876		tumour: % Stain 1 Positive Cells	50.4776		tumour: % Stain 1 Positive Cells	61.0419		tumour: % Stain 1 Positive Cells	58.2227		tumour: % Stain 1 Positive Cells	25.6051
		tumour: % Stain 1 0+ Cells	49.2452		tumour: % Stain 1 0+ Cells	40.3995		tumour: % Stain 1 0+ Cells	80.7692		tumour: % Stain 1 0+ Cells	77.6124		tumour: % Stain 1 0+ Cells	49.5224		tumour: % Stain 1 0+ Cells	38.9581		tumour: % Stain 1 0+ Cells	41.7773		tumour: % Stain 1 0+ Cells	74.3949
		tumour: % Stain 1 1+ Cells	15.4163		tumour: % Stain 1 1+ Cells	15.0451		tumour: % Stain 1 1+ Cells	6.38112		tumour: % Stain 1 1+ Cells	7.14089		tumour: % Stain 1 1+ Cells	12.3284		tumour: % Stain 1 1+ Cells	16.6761		tumour: % Stain 1 1+ Cells	15.8325		tumour: % Stain 1 1+ Cells	10.0637
		tumour: % Stain 1 2+ Cells	20.2882		tumour: % Stain 1 2+ Cells	25.5799		tumour: % Stain 1 2+ Cells	6.38112		tumour: % Stain 1 2+ Cells	7.30631		tumour: % Stain 1 2+ Cells	21.6119		tumour: % Stain 1 2+ Cells	21.6874		tumour: % Stain 1 2+ Cells	24.3105		tumour: % Stain 1 2+ Cells	8.66242
		tumour: % Stain 1 3+ Cells	15.0503		tumour: % Stain 1 3+ Cells	18.9755		tumour: % Stain 1 3+ Cells	6.46853		tumour: % Stain 1 3+ Cells	7.94045		tumour: % Stain 1 3+ Cells	16.5373		tumour: % Stain 1 3+ Cells	22.6784		tumour: % Stain 1 3+ Cells	18.0797		tumour: % Stain 1 3+ Cells	6.87898
		tumour: Stain 1 H-Score	101.144		tumour: Stain 1 H-Score	123.131		tumour: Stain 1 H-Score	38.549		tumour: Stain 1 H-Score	45.5749		tumour: Stain 1 H-Score	105.164		tumour: Stain 1 H-Score	128.086		tumour: Stain 1 H-Score	118.693		tumour: Stain 1 H-Score	48.0255
		tumour: % Stain 2 Positive Cells	0		tumour: % Stain 2 Positive Cells	0		tumour: % Stain 2 Positive Cells	0		tumour: % Stain 2 Positive Cells	0		tumour: % Stain 2 Positive Cells	0		tumour: % Stain 2 Positive Cells	0		tumour: % Stain 2 Positive Cells	0		tumour: % Stain 2 Positive Cells	0
		tumour: % Stain 2 0+ Cells	100		tumour: % Stain 2 0+ Cells	100		tumour: % Stain 2 0+ Cells	100		tumour: % Stain 2 0+ Cells	100		tumour: % Stain 2 0+ Cells	100		tumour: % Stain 2 0+ Cells	100		tumour: % Stain 2 0+ Cells	100		tumour: % Stain 2 0+ Cells	100
		tumour: % Stain 2 1+ Cells	0		tumour: % Stain 2 1+ Cells	0		tumour: % Stain 2 1+ Cells	0		tumour: % Stain 2 1+ Cells	0		tumour: % Stain 2 1+ Cells	0		tumour: % Stain 2 1+ Cells	0		tumour: % Stain 2 1+ Cells	0		tumour: % Stain 2 1+ Cells	0
		tumour: % Stain 2 2+ Cells	0		tumour: % Stain 2 2+ Cells	0		tumour: % Stain 2 2+ Cells	0		tumour: % Stain 2 2+ Cells	0		tumour: % Stain 2 2+ Cells	0		tumour: % Stain 2 2+ Cells	0		tumour: % Stain 2 2+ Cells	0		tumour: % Stain 2 2+ Cells	0
		tumour: % Stain 2 3+ Cells	0		tumour: % Stain 2 3+ Cells	0		tumour: % Stain 2 3+ Cells	0		tumour: % Stain 2 3+ Cells	0		tumour: % Stain 2 3+ Cells	0		tumour: % Stain 2 3+ Cells	0		tumour: % Stain 2 3+ Cells	0		tumour: % Stain 2 3+ Cells	0
		tumour: Stain 2 H-Score	0		tumour: Stain 2 H-Score	0		tumour: Stain 2 H-Score	0		tumour: Stain 2 H-Score	0		tumour: Stain 2 H-Score	0		tumour: Stain 2 H-Score	0		tumour: Stain 2 H-Score	0		tumour: Stain 2 H-Score	0
		tumour: % Dual Positive Cells	0		tumour: % Dual Positive Cells	0		tumour: % Dual Positive Cells	0		tumour: % Dual Positive Cells	0		tumour: % Dual Positive Cells	0		tumour: % Dual Positive Cells	0		tumour: % Dual Positive Cells	0		tumour: % Dual Positive Cells	0
		tumour: % Dual Negative Cells	49.2452		tumour: % Dual Negative Cells	40.3995		tumour: % Dual Negative Cells	80.7692		tumour: % Dual Negative Cells	77.6124		tumour: % Dual Negative Cells	49.5224		tumour: % Dual Negative Cells	38.9581		tumour: % Dual Negative Cells	41.7773		tumour: % Dual Negative Cells	74.3949
		tumour: Avg Stain 1 Nuclear OD	0.242139		tumour: Avg Stain 1 Nuclear OD	0.285942		tumour: Avg Stain 1 Nuclear OD	0.109915		tumour: Avg Stain 1 Nuclear OD	0.125566		tumour: Avg Stain 1 Nuclear OD	0.251948		tumour: Avg Stain 1 Nuclear OD	0.304355		tumour: Avg Stain 1 Nuclear OD	0.280076		tumour: Avg Stain 1 Nuclear OD	0.128595
		tumour: Avg Stain 2 Nuclear OD	0.0483354		tumour: Avg Stain 2 Nuclear OD	0.0518103		tumour: Avg Stain 2 Nuclear OD	0.0419132		tumour: Avg Stain 2 Nuclear OD	0.0437831		tumour: Avg Stain 2 Nuclear OD	0.0482427		tumour: Avg Stain 2 Nuclear OD	0.0538502		tumour: Avg Stain 2 Nuclear OD	0.0491213		tumour: Avg Stain 2 Nuclear OD	0.0423919
		tumour: Avg Stain 1 Cytoplasmic OD	0.067185		tumour: Avg Stain 1 Cytoplasmic OD	0.0747806		tumour: Avg Stain 1 Cytoplasmic OD	0.0417986		tumour: Avg Stain 1 Cytoplasmic OD	0.0448731		tumour: Avg Stain 1 Cytoplasmic OD	0.0757561		tumour: Avg Stain 1 Cytoplasmic OD	0.0771499		tumour: Avg Stain 1 Cytoplasmic OD	0.0783519		tumour: Avg Stain 1 Cytoplasmic OD	0.0472977
		tumour: Avg Stain 2 Cytoplasmic OD	0.0322123		tumour: Avg Stain 2 Cytoplasmic OD	0.0324167		tumour: Avg Stain 2 Cytoplasmic OD	0.0322668		tumour: Avg Stain 2 Cytoplasmic OD	0.0324331		tumour: Avg Stain 2 Cytoplasmic OD	0.0319688		tumour: Avg Stain 2 Cytoplasmic OD	0.0324478		tumour: Avg Stain 2 Cytoplasmic OD	0.0321066		tumour: Avg Stain 2 Cytoplasmic OD	0.0322976
		tumour: Avg Cell Area (µm²)	105.372		tumour: Avg Cell Area (µm²)	107.231		tumour: Avg Cell Area (µm²)	108.234		tumour: Avg Cell Area (µm²)	103.971		tumour: Avg Cell Area (µm²)	103.094		tumour: Avg Cell Area (µm²)	111.986		tumour: Avg Cell Area (µm²)	103.988		tumour: Avg Cell Area (µm²)	107.976
		tumour: Avg Cytoplasm Area (µm²)	78.87		tumour: Avg Cytoplasm Area (µm²)	79.0205		tumour: Avg Cytoplasm Area (µm²)	84.6275		tumour: Avg Cytoplasm Area (µm²)	79.4952		tumour: Avg Cytoplasm Area (µm²)	74.8699		tumour: Avg Cytoplasm Area (µm²)	82.8404		tumour: Avg Cytoplasm Area (µm²)	76.1611		tumour: Avg Cytoplasm Area (µm²)	83.9442
		tumour: Avg Nucleus Area (µm²)	26.5017		tumour: Avg Nucleus Area (µm²)	28.2108		tumour: Avg Nucleus Area (µm²)	23.6062		tumour: Avg Nucleus Area (µm²)	24.476		tumour: Avg Nucleus Area (µm²)	28.2237		tumour: Avg Nucleus Area (µm²)	29.1458		tumour: Avg Nucleus Area (µm²)	27.8271		tumour: Avg Nucleus Area (µm²)	24.0318
		tumour: Avg Nucleus Perimeter (µm)	10.3166		tumour: Avg Nucleus Perimeter (µm)	10.961		tumour: Avg Nucleus Perimeter (µm)	9.28066		tumour: Avg Nucleus Perimeter (µm)	9.58501		tumour: Avg Nucleus Perimeter (µm)	10.9466		tumour: Avg Nucleus Perimeter (µm)	11.1936		tumour: Avg Nucleus Perimeter (µm)	10.796		tumour: Avg Nucleus Perimeter (µm)	9.42885
		tumour: Avg Nucleus Roundness	0.69698		tumour: Avg Nucleus Roundness	0.697346		tumour: Avg Nucleus Roundness	0.702667		tumour: Avg Nucleus Roundness	0.698434		tumour: Avg Nucleus Roundness	0.691132		tumour: Avg Nucleus Roundness	0.70069		tumour: Avg Nucleus Roundness	0.693608		tumour: Avg Nucleus Roundness	0.701559
		tumour: Tissue Area (µm²)	1013600		tumour: Tissue Area (µm²)	718368		tumour: Tissue Area (µm²)	613477		tumour: Tissue Area (µm²)	859927		tumour: Tissue Area (µm²)	699570		tumour: Tissue Area (µm²)	878669		tumour: Tissue Area (µm²)	431172		tumour: Tissue Area (µm²)	820768
		BSNA39.1c	WT
		Name	Value		Name	Value		Name	Value		Name	Value		Name	Value		Name	Value		Name	Value		Name	Value
		Classified Area (mm²)	1.19204		Classified Area (mm²)	1.08518		Classified Area (mm²)	1.32518		Classified Area (mm²)	1.25813		Classified Area (mm²)	1.1495		Classified Area (mm²)	1.26796		Classified Area (mm²)	1.42351		Classified Area (mm²)	1.47174
		tumour Area (mm²)	1.17627		tumour Area (mm²)	1.05718		tumour Area (mm²)	1.28603		tumour Area (mm²)	1.25546		tumour Area (mm²)	1.13907		tumour Area (mm²)	1.2001		tumour Area (mm²)	1.405		tumour Area (mm²)	1.46788
		empty Area (mm²)	0.00293		empty Area (mm²)	0.01366		empty Area (mm²)	0.02944		empty Area (mm²)	0.00075		empty Area (mm²)	5e-05		empty Area (mm²)	0.05348		empty Area (mm²)	0.00591		empty Area (mm²)	0.00292
		necrosis Area (mm²)	0		necrosis Area (mm²)	0.00051		necrosis Area (mm²)	0.00093		necrosis Area (mm²)	0		necrosis Area (mm²)	0.00098		necrosis Area (mm²)	0.0039		necrosis Area (mm²)	0.00369		necrosis Area (mm²)	0
		normal Area (mm²)	0.01284		normal Area (mm²)	0.01384		normal Area (mm²)	0.00878		normal Area (mm²)	0.00192		normal Area (mm²)	0.0094		normal Area (mm²)	0.01047		normal Area (mm²)	0.00891		normal Area (mm²)	0.00095
		Total Cells	5679		Total Cells	4547		Total Cells	5245		Total Cells	5371		Total Cells	5361		Total Cells	4930		Total Cells	5483		Total Cells	6366
		Stain 1 Positive Cells	2498		Stain 1 Positive Cells	1376		Stain 1 Positive Cells	1564		Stain 1 Positive Cells	2539		Stain 1 Positive Cells	3206		Stain 1 Positive Cells	1508		Stain 1 Positive Cells	1576		Stain 1 Positive Cells	3564
		Stain 1 0+ Cells	3181		Stain 1 0+ Cells	3171		Stain 1 0+ Cells	3681		Stain 1 0+ Cells	2832		Stain 1 0+ Cells	2155		Stain 1 0+ Cells	3422		Stain 1 0+ Cells	3907		Stain 1 0+ Cells	2802
		Stain 1 1+ Cells	658		Stain 1 1+ Cells	375		Stain 1 1+ Cells	450		Stain 1 1+ Cells	731		Stain 1 1+ Cells	862		Stain 1 1+ Cells	418		Stain 1 1+ Cells	527		Stain 1 1+ Cells	1029
		Stain 1 2+ Cells	958		Stain 1 2+ Cells	546		Stain 1 2+ Cells	665		Stain 1 2+ Cells	1127		Stain 1 2+ Cells	1560		Stain 1 2+ Cells	651		Stain 1 2+ Cells	558		Stain 1 2+ Cells	1444
		Stain 1 3+ Cells	882		Stain 1 3+ Cells	455		Stain 1 3+ Cells	449		Stain 1 3+ Cells	681		Stain 1 3+ Cells	784		Stain 1 3+ Cells	439		Stain 1 3+ Cells	491		Stain 1 3+ Cells	1091
		Stain 2 Positive Cells	0		Stain 2 Positive Cells	0		Stain 2 Positive Cells	0		Stain 2 Positive Cells	0		Stain 2 Positive Cells	0		Stain 2 Positive Cells	0		Stain 2 Positive Cells	0		Stain 2 Positive Cells	0
		Stain 2 0+ Cells	5679		Stain 2 0+ Cells	4547		Stain 2 0+ Cells	5245		Stain 2 0+ Cells	5371		Stain 2 0+ Cells	5361		Stain 2 0+ Cells	4930		Stain 2 0+ Cells	5483		Stain 2 0+ Cells	6366
		Stain 2 1+ Cells	0		Stain 2 1+ Cells	0		Stain 2 1+ Cells	0		Stain 2 1+ Cells	0		Stain 2 1+ Cells	0		Stain 2 1+ Cells	0		Stain 2 1+ Cells	0		Stain 2 1+ Cells	0
		Stain 2 2+ Cells	0		Stain 2 2+ Cells	0		Stain 2 2+ Cells	0		Stain 2 2+ Cells	0		Stain 2 2+ Cells	0		Stain 2 2+ Cells	0		Stain 2 2+ Cells	0		Stain 2 2+ Cells	0
		Stain 2 3+ Cells	0		Stain 2 3+ Cells	0		Stain 2 3+ Cells	0		Stain 2 3+ Cells	0		Stain 2 3+ Cells	0		Stain 2 3+ Cells	0		Stain 2 3+ Cells	0		Stain 2 3+ Cells	0
		Dual Positive Cells	0		Dual Positive Cells	0		Dual Positive Cells	0		Dual Positive Cells	0		Dual Positive Cells	0		Dual Positive Cells	0		Dual Positive Cells	0		Dual Positive Cells	0
		Dual Negative Cells	3181		Dual Negative Cells	3171		Dual Negative Cells	3681		Dual Negative Cells	2832		Dual Negative Cells	2155		Dual Negative Cells	3422		Dual Negative Cells	3907		Dual Negative Cells	2802
		% Stain 1 Positive Cells	43.9866		% Stain 1 Positive Cells	30.2617		% Stain 1 Positive Cells	29.8189		% Stain 1 Positive Cells	47.2724		% Stain 1 Positive Cells	59.8023		% Stain 1 Positive Cells	30.5882		% Stain 1 Positive Cells	28.7434		% Stain 1 Positive Cells	55.9849		40.8073
		% Stain 1 0+ Cells	56.0134		% Stain 1 0+ Cells	69.7383		% Stain 1 0+ Cells	70.1811		% Stain 1 0+ Cells	52.7276		% Stain 1 0+ Cells	40.1977		% Stain 1 0+ Cells	69.4118		% Stain 1 0+ Cells	71.2566		% Stain 1 0+ Cells	44.0151
		% Stain 1 1+ Cells	11.5865		% Stain 1 1+ Cells	8.2472		% Stain 1 1+ Cells	8.5796		% Stain 1 1+ Cells	13.6101		% Stain 1 1+ Cells	16.0791		% Stain 1 1+ Cells	8.4787		% Stain 1 1+ Cells	9.61153		% Stain 1 1+ Cells	16.164
		% Stain 1 2+ Cells	16.8692		% Stain 1 2+ Cells	12.0079		% Stain 1 2+ Cells	12.6787		% Stain 1 2+ Cells	20.9831		% Stain 1 2+ Cells	29.099		% Stain 1 2+ Cells	13.2049		% Stain 1 2+ Cells	10.1769		% Stain 1 2+ Cells	22.683
		% Stain 1 3+ Cells	15.5309		% Stain 1 3+ Cells	10.0066		% Stain 1 3+ Cells	8.56053		% Stain 1 3+ Cells	12.6792		% Stain 1 3+ Cells	14.6241		% Stain 1 3+ Cells	8.90467		% Stain 1 3+ Cells	8.95495		% Stain 1 3+ Cells	17.1379
		Stain 1 H-Score	91.9176		Stain 1 H-Score	62.2828		Stain 1 H-Score	59.6187		Stain 1 H-Score	93.6139		Stain 1 H-Score	118.15		Stain 1 H-Score	61.6024		Stain 1 H-Score	56.8302		Stain 1 H-Score	112.944
		% Stain 2 Positive Cells	0		% Stain 2 Positive Cells	0		% Stain 2 Positive Cells	0		% Stain 2 Positive Cells	0		% Stain 2 Positive Cells	0		% Stain 2 Positive Cells	0		% Stain 2 Positive Cells	0		% Stain 2 Positive Cells	0
		% Stain 2 0+ Cells	100		% Stain 2 0+ Cells	100		% Stain 2 0+ Cells	100		% Stain 2 0+ Cells	100		% Stain 2 0+ Cells	100		% Stain 2 0+ Cells	100		% Stain 2 0+ Cells	100		% Stain 2 0+ Cells	100
		% Stain 2 1+ Cells	0		% Stain 2 1+ Cells	0		% Stain 2 1+ Cells	0		% Stain 2 1+ Cells	0		% Stain 2 1+ Cells	0		% Stain 2 1+ Cells	0		% Stain 2 1+ Cells	0		% Stain 2 1+ Cells	0
		% Stain 2 2+ Cells	0		% Stain 2 2+ Cells	0		% Stain 2 2+ Cells	0		% Stain 2 2+ Cells	0		% Stain 2 2+ Cells	0		% Stain 2 2+ Cells	0		% Stain 2 2+ Cells	0		% Stain 2 2+ Cells	0
		% Stain 2 3+ Cells	0		% Stain 2 3+ Cells	0		% Stain 2 3+ Cells	0		% Stain 2 3+ Cells	0		% Stain 2 3+ Cells	0		% Stain 2 3+ Cells	0		% Stain 2 3+ Cells	0		% Stain 2 3+ Cells	0
		Stain 2 H-Score	0		Stain 2 H-Score	0		Stain 2 H-Score	0		Stain 2 H-Score	0		Stain 2 H-Score	0		Stain 2 H-Score	0		Stain 2 H-Score	0		Stain 2 H-Score	0
		% Dual Positive Cells	0		% Dual Positive Cells	0		% Dual Positive Cells	0		% Dual Positive Cells	0		% Dual Positive Cells	0		% Dual Positive Cells	0		% Dual Positive Cells	0		% Dual Positive Cells	0
		% Dual Negative Cells	56.0134		% Dual Negative Cells	69.7383		% Dual Negative Cells	70.1811		% Dual Negative Cells	52.7276		% Dual Negative Cells	40.1977		% Dual Negative Cells	69.4118		% Dual Negative Cells	71.2566		% Dual Negative Cells	44.0151
		Avg Stain 1 Nuclear OD	0.22519		Avg Stain 1 Nuclear OD	0.160062		Avg Stain 1 Nuclear OD	0.151785		Avg Stain 1 Nuclear OD	0.223003		Avg Stain 1 Nuclear OD	0.269038		Avg Stain 1 Nuclear OD	0.156689		Avg Stain 1 Nuclear OD	0.149408		Avg Stain 1 Nuclear OD	0.265647
		Avg Stain 2 Nuclear OD	0.048358		Avg Stain 2 Nuclear OD	0.0443675		Avg Stain 2 Nuclear OD	0.0435834		Avg Stain 2 Nuclear OD	0.0457505		Avg Stain 2 Nuclear OD	0.0481226		Avg Stain 2 Nuclear OD	0.0445897		Avg Stain 2 Nuclear OD	0.043347		Avg Stain 2 Nuclear OD	0.0485298
		Avg Stain 1 Cytoplasmic OD	0.0633064		Avg Stain 1 Cytoplasmic OD	0.0499454		Avg Stain 1 Cytoplasmic OD	0.049625		Avg Stain 1 Cytoplasmic OD	0.0627316		Avg Stain 1 Cytoplasmic OD	0.0751302		Avg Stain 1 Cytoplasmic OD	0.0501855		Avg Stain 1 Cytoplasmic OD	0.0490601		Avg Stain 1 Cytoplasmic OD	0.0695492
		Avg Stain 2 Cytoplasmic OD	0.0323352		Avg Stain 2 Cytoplasmic OD	0.0323053		Avg Stain 2 Cytoplasmic OD	0.0324749		Avg Stain 2 Cytoplasmic OD	0.0321193		Avg Stain 2 Cytoplasmic OD	0.032017		Avg Stain 2 Cytoplasmic OD	0.0324088		Avg Stain 2 Cytoplasmic OD	0.0320918		Avg Stain 2 Cytoplasmic OD	0.0321595
		Avg Cell Area (µm²)	93.1342		Avg Cell Area (µm²)	94.0618		Avg Cell Area (µm²)	93.418		Avg Cell Area (µm²)	98.8871		Avg Cell Area (µm²)	94.3132		Avg Cell Area (µm²)	92.7229		Avg Cell Area (µm²)	95.5221		Avg Cell Area (µm²)	97.7558
		Avg Cytoplasm Area (µm²)	70.3894		Avg Cytoplasm Area (µm²)	72.5488		Avg Cytoplasm Area (µm²)	71.3394		Avg Cytoplasm Area (µm²)	76.9897		Avg Cytoplasm Area (µm²)	71.9561		Avg Cytoplasm Area (µm²)	71.4135		Avg Cytoplasm Area (µm²)	74.4965		Avg Cytoplasm Area (µm²)	74.8594
		Avg Nucleus Area (µm²)	22.7447		Avg Nucleus Area (µm²)	21.513		Avg Nucleus Area (µm²)	22.0786		Avg Nucleus Area (µm²)	21.8975		Avg Nucleus Area (µm²)	22.3572		Avg Nucleus Area (µm²)	21.3095		Avg Nucleus Area (µm²)	21.0256		Avg Nucleus Area (µm²)	22.8964
		Avg Nucleus Perimeter (µm)	9.02327		Avg Nucleus Perimeter (µm)	8.54669		Avg Nucleus Perimeter (µm)	8.77157		Avg Nucleus Perimeter (µm)	8.6955		Avg Nucleus Perimeter (µm)	8.87826		Avg Nucleus Perimeter (µm)	8.46479		Avg Nucleus Perimeter (µm)	8.34358		Avg Nucleus Perimeter (µm)	9.08221
		Avg Nucleus Roundness	0.69103		Avg Nucleus Roundness	0.686286		Avg Nucleus Roundness	0.681932		Avg Nucleus Roundness	0.69708		Avg Nucleus Roundness	0.69254		Avg Nucleus Roundness	0.68406		Avg Nucleus Roundness	0.690088		Avg Nucleus Roundness	0.692825
		Tissue Area (µm²)	1156770		Tissue Area (µm²)	957576		Tissue Area (µm²)	1081730		Tissue Area (µm²)	1228870		Tissue Area (µm²)	1116810		Tissue Area (µm²)	1029560		Tissue Area (µm²)	1212120		Tissue Area (µm²)	1432400
		tumour: Total Cells	5679		tumour: Total Cells	4547		tumour: Total Cells	5245		tumour: Total Cells	5371		tumour: Total Cells	5361		tumour: Total Cells	4930		tumour: Total Cells	5483		tumour: Total Cells	6366
		tumour: Stain 1 Positive Cells	2498		tumour: Stain 1 Positive Cells	1376		tumour: Stain 1 Positive Cells	1564		tumour: Stain 1 Positive Cells	2539		tumour: Stain 1 Positive Cells	3206		tumour: Stain 1 Positive Cells	1508		tumour: Stain 1 Positive Cells	1576		tumour: Stain 1 Positive Cells	3564
		tumour: Stain 1 0+ Cells	3181		tumour: Stain 1 0+ Cells	3171		tumour: Stain 1 0+ Cells	3681		tumour: Stain 1 0+ Cells	2832		tumour: Stain 1 0+ Cells	2155		tumour: Stain 1 0+ Cells	3422		tumour: Stain 1 0+ Cells	3907		tumour: Stain 1 0+ Cells	2802
		tumour: Stain 1 1+ Cells	658		tumour: Stain 1 1+ Cells	375		tumour: Stain 1 1+ Cells	450		tumour: Stain 1 1+ Cells	731		tumour: Stain 1 1+ Cells	862		tumour: Stain 1 1+ Cells	418		tumour: Stain 1 1+ Cells	527		tumour: Stain 1 1+ Cells	1029
		tumour: Stain 1 2+ Cells	958		tumour: Stain 1 2+ Cells	546		tumour: Stain 1 2+ Cells	665		tumour: Stain 1 2+ Cells	1127		tumour: Stain 1 2+ Cells	1560		tumour: Stain 1 2+ Cells	651		tumour: Stain 1 2+ Cells	558		tumour: Stain 1 2+ Cells	1444
		tumour: Stain 1 3+ Cells	882		tumour: Stain 1 3+ Cells	455		tumour: Stain 1 3+ Cells	449		tumour: Stain 1 3+ Cells	681		tumour: Stain 1 3+ Cells	784		tumour: Stain 1 3+ Cells	439		tumour: Stain 1 3+ Cells	491		tumour: Stain 1 3+ Cells	1091
		tumour: Stain 2 Positive Cells	0		tumour: Stain 2 Positive Cells	0		tumour: Stain 2 Positive Cells	0		tumour: Stain 2 Positive Cells	0		tumour: Stain 2 Positive Cells	0		tumour: Stain 2 Positive Cells	0		tumour: Stain 2 Positive Cells	0		tumour: Stain 2 Positive Cells	0
		tumour: Stain 2 0+ Cells	5679		tumour: Stain 2 0+ Cells	4547		tumour: Stain 2 0+ Cells	5245		tumour: Stain 2 0+ Cells	5371		tumour: Stain 2 0+ Cells	5361		tumour: Stain 2 0+ Cells	4930		tumour: Stain 2 0+ Cells	5483		tumour: Stain 2 0+ Cells	6366
		tumour: Stain 2 1+ Cells	0		tumour: Stain 2 1+ Cells	0		tumour: Stain 2 1+ Cells	0		tumour: Stain 2 1+ Cells	0		tumour: Stain 2 1+ Cells	0		tumour: Stain 2 1+ Cells	0		tumour: Stain 2 1+ Cells	0		tumour: Stain 2 1+ Cells	0
		tumour: Stain 2 2+ Cells	0		tumour: Stain 2 2+ Cells	0		tumour: Stain 2 2+ Cells	0		tumour: Stain 2 2+ Cells	0		tumour: Stain 2 2+ Cells	0		tumour: Stain 2 2+ Cells	0		tumour: Stain 2 2+ Cells	0		tumour: Stain 2 2+ Cells	0
		tumour: Stain 2 3+ Cells	0		tumour: Stain 2 3+ Cells	0		tumour: Stain 2 3+ Cells	0		tumour: Stain 2 3+ Cells	0		tumour: Stain 2 3+ Cells	0		tumour: Stain 2 3+ Cells	0		tumour: Stain 2 3+ Cells	0		tumour: Stain 2 3+ Cells	0
		tumour: Dual Positive Cells	0		tumour: Dual Positive Cells	0		tumour: Dual Positive Cells	0		tumour: Dual Positive Cells	0		tumour: Dual Positive Cells	0		tumour: Dual Positive Cells	0		tumour: Dual Positive Cells	0		tumour: Dual Positive Cells	0
		tumour: Dual Negative Cells	3181		tumour: Dual Negative Cells	3171		tumour: Dual Negative Cells	3681		tumour: Dual Negative Cells	2832		tumour: Dual Negative Cells	2155		tumour: Dual Negative Cells	3422		tumour: Dual Negative Cells	3907		tumour: Dual Negative Cells	2802
		tumour: % Stain 1 Positive Cells	43.9866		tumour: % Stain 1 Positive Cells	30.2617		tumour: % Stain 1 Positive Cells	29.8189		tumour: % Stain 1 Positive Cells	47.2724		tumour: % Stain 1 Positive Cells	59.8023		tumour: % Stain 1 Positive Cells	30.5882		tumour: % Stain 1 Positive Cells	28.7434		tumour: % Stain 1 Positive Cells	55.9849
		tumour: % Stain 1 0+ Cells	56.0134		tumour: % Stain 1 0+ Cells	69.7383		tumour: % Stain 1 0+ Cells	70.1811		tumour: % Stain 1 0+ Cells	52.7276		tumour: % Stain 1 0+ Cells	40.1977		tumour: % Stain 1 0+ Cells	69.4118		tumour: % Stain 1 0+ Cells	71.2566		tumour: % Stain 1 0+ Cells	44.0151
		tumour: % Stain 1 1+ Cells	11.5865		tumour: % Stain 1 1+ Cells	8.2472		tumour: % Stain 1 1+ Cells	8.5796		tumour: % Stain 1 1+ Cells	13.6101		tumour: % Stain 1 1+ Cells	16.0791		tumour: % Stain 1 1+ Cells	8.4787		tumour: % Stain 1 1+ Cells	9.61153		tumour: % Stain 1 1+ Cells	16.164
		tumour: % Stain 1 2+ Cells	16.8692		tumour: % Stain 1 2+ Cells	12.0079		tumour: % Stain 1 2+ Cells	12.6787		tumour: % Stain 1 2+ Cells	20.9831		tumour: % Stain 1 2+ Cells	29.099		tumour: % Stain 1 2+ Cells	13.2049		tumour: % Stain 1 2+ Cells	10.1769		tumour: % Stain 1 2+ Cells	22.683
		tumour: % Stain 1 3+ Cells	15.5309		tumour: % Stain 1 3+ Cells	10.0066		tumour: % Stain 1 3+ Cells	8.56053		tumour: % Stain 1 3+ Cells	12.6792		tumour: % Stain 1 3+ Cells	14.6241		tumour: % Stain 1 3+ Cells	8.90467		tumour: % Stain 1 3+ Cells	8.95495		tumour: % Stain 1 3+ Cells	17.1379
		tumour: Stain 1 H-Score	91.9176		tumour: Stain 1 H-Score	62.2828		tumour: Stain 1 H-Score	59.6187		tumour: Stain 1 H-Score	93.6139		tumour: Stain 1 H-Score	118.15		tumour: Stain 1 H-Score	61.6024		tumour: Stain 1 H-Score	56.8302		tumour: Stain 1 H-Score	112.944
		tumour: % Stain 2 Positive Cells	0		tumour: % Stain 2 Positive Cells	0		tumour: % Stain 2 Positive Cells	0		tumour: % Stain 2 Positive Cells	0		tumour: % Stain 2 Positive Cells	0		tumour: % Stain 2 Positive Cells	0		tumour: % Stain 2 Positive Cells	0		tumour: % Stain 2 Positive Cells	0
		tumour: % Stain 2 0+ Cells	100		tumour: % Stain 2 0+ Cells	100		tumour: % Stain 2 0+ Cells	100		tumour: % Stain 2 0+ Cells	100		tumour: % Stain 2 0+ Cells	100		tumour: % Stain 2 0+ Cells	100		tumour: % Stain 2 0+ Cells	100		tumour: % Stain 2 0+ Cells	100
		tumour: % Stain 2 1+ Cells	0		tumour: % Stain 2 1+ Cells	0		tumour: % Stain 2 1+ Cells	0		tumour: % Stain 2 1+ Cells	0		tumour: % Stain 2 1+ Cells	0		tumour: % Stain 2 1+ Cells	0		tumour: % Stain 2 1+ Cells	0		tumour: % Stain 2 1+ Cells	0
		tumour: % Stain 2 2+ Cells	0		tumour: % Stain 2 2+ Cells	0		tumour: % Stain 2 2+ Cells	0		tumour: % Stain 2 2+ Cells	0		tumour: % Stain 2 2+ Cells	0		tumour: % Stain 2 2+ Cells	0		tumour: % Stain 2 2+ Cells	0		tumour: % Stain 2 2+ Cells	0
		tumour: % Stain 2 3+ Cells	0		tumour: % Stain 2 3+ Cells	0		tumour: % Stain 2 3+ Cells	0		tumour: % Stain 2 3+ Cells	0		tumour: % Stain 2 3+ Cells	0		tumour: % Stain 2 3+ Cells	0		tumour: % Stain 2 3+ Cells	0		tumour: % Stain 2 3+ Cells	0
		tumour: Stain 2 H-Score	0		tumour: Stain 2 H-Score	0		tumour: Stain 2 H-Score	0		tumour: Stain 2 H-Score	0		tumour: Stain 2 H-Score	0		tumour: Stain 2 H-Score	0		tumour: Stain 2 H-Score	0		tumour: Stain 2 H-Score	0
		tumour: % Dual Positive Cells	0		tumour: % Dual Positive Cells	0		tumour: % Dual Positive Cells	0		tumour: % Dual Positive Cells	0		tumour: % Dual Positive Cells	0		tumour: % Dual Positive Cells	0		tumour: % Dual Positive Cells	0		tumour: % Dual Positive Cells	0
		tumour: % Dual Negative Cells	56.0134		tumour: % Dual Negative Cells	69.7383		tumour: % Dual Negative Cells	70.1811		tumour: % Dual Negative Cells	52.7276		tumour: % Dual Negative Cells	40.1977		tumour: % Dual Negative Cells	69.4118		tumour: % Dual Negative Cells	71.2566		tumour: % Dual Negative Cells	44.0151
		tumour: Avg Stain 1 Nuclear OD	0.22519		tumour: Avg Stain 1 Nuclear OD	0.160062		tumour: Avg Stain 1 Nuclear OD	0.151785		tumour: Avg Stain 1 Nuclear OD	0.223003		tumour: Avg Stain 1 Nuclear OD	0.269038		tumour: Avg Stain 1 Nuclear OD	0.156689		tumour: Avg Stain 1 Nuclear OD	0.149408		tumour: Avg Stain 1 Nuclear OD	0.265647
		tumour: Avg Stain 2 Nuclear OD	0.048358		tumour: Avg Stain 2 Nuclear OD	0.0443675		tumour: Avg Stain 2 Nuclear OD	0.0435834		tumour: Avg Stain 2 Nuclear OD	0.0457505		tumour: Avg Stain 2 Nuclear OD	0.0481226		tumour: Avg Stain 2 Nuclear OD	0.0445897		tumour: Avg Stain 2 Nuclear OD	0.043347		tumour: Avg Stain 2 Nuclear OD	0.0485298
		tumour: Avg Stain 1 Cytoplasmic OD	0.0633064		tumour: Avg Stain 1 Cytoplasmic OD	0.0499454		tumour: Avg Stain 1 Cytoplasmic OD	0.049625		tumour: Avg Stain 1 Cytoplasmic OD	0.0627316		tumour: Avg Stain 1 Cytoplasmic OD	0.0751302		tumour: Avg Stain 1 Cytoplasmic OD	0.0501855		tumour: Avg Stain 1 Cytoplasmic OD	0.0490601		tumour: Avg Stain 1 Cytoplasmic OD	0.0695492
		tumour: Avg Stain 2 Cytoplasmic OD	0.0323352		tumour: Avg Stain 2 Cytoplasmic OD	0.0323053		tumour: Avg Stain 2 Cytoplasmic OD	0.0324749		tumour: Avg Stain 2 Cytoplasmic OD	0.0321193		tumour: Avg Stain 2 Cytoplasmic OD	0.032017		tumour: Avg Stain 2 Cytoplasmic OD	0.0324088		tumour: Avg Stain 2 Cytoplasmic OD	0.0320918		tumour: Avg Stain 2 Cytoplasmic OD	0.0321595
		tumour: Avg Cell Area (µm²)	93.1342		tumour: Avg Cell Area (µm²)	94.0618		tumour: Avg Cell Area (µm²)	93.418		tumour: Avg Cell Area (µm²)	98.8871		tumour: Avg Cell Area (µm²)	94.3132		tumour: Avg Cell Area (µm²)	92.7229		tumour: Avg Cell Area (µm²)	95.5221		tumour: Avg Cell Area (µm²)	97.7558
		tumour: Avg Cytoplasm Area (µm²)	70.3894		tumour: Avg Cytoplasm Area (µm²)	72.5488		tumour: Avg Cytoplasm Area (µm²)	71.3394		tumour: Avg Cytoplasm Area (µm²)	76.9897		tumour: Avg Cytoplasm Area (µm²)	71.9561		tumour: Avg Cytoplasm Area (µm²)	71.4135		tumour: Avg Cytoplasm Area (µm²)	74.4965		tumour: Avg Cytoplasm Area (µm²)	74.8594
		tumour: Avg Nucleus Area (µm²)	22.7447		tumour: Avg Nucleus Area (µm²)	21.513		tumour: Avg Nucleus Area (µm²)	22.0786		tumour: Avg Nucleus Area (µm²)	21.8975		tumour: Avg Nucleus Area (µm²)	22.3572		tumour: Avg Nucleus Area (µm²)	21.3095		tumour: Avg Nucleus Area (µm²)	21.0256		tumour: Avg Nucleus Area (µm²)	22.8964
		tumour: Avg Nucleus Perimeter (µm)	9.02327		tumour: Avg Nucleus Perimeter (µm)	8.54669		tumour: Avg Nucleus Perimeter (µm)	8.77157		tumour: Avg Nucleus Perimeter (µm)	8.6955		tumour: Avg Nucleus Perimeter (µm)	8.87826		tumour: Avg Nucleus Perimeter (µm)	8.46479		tumour: Avg Nucleus Perimeter (µm)	8.34358		tumour: Avg Nucleus Perimeter (µm)	9.08221
		tumour: Avg Nucleus Roundness	0.69103		tumour: Avg Nucleus Roundness	0.686286		tumour: Avg Nucleus Roundness	0.681932		tumour: Avg Nucleus Roundness	0.69708		tumour: Avg Nucleus Roundness	0.69254		tumour: Avg Nucleus Roundness	0.68406		tumour: Avg Nucleus Roundness	0.690088		tumour: Avg Nucleus Roundness	0.692825
		tumour: Tissue Area (µm²)	1156770		tumour: Tissue Area (µm²)	957576		tumour: Tissue Area (µm²)	1081730		tumour: Tissue Area (µm²)	1228870		tumour: Tissue Area (µm²)	1116810		tumour: Tissue Area (µm²)	1029560		tumour: Tissue Area (µm²)	1212120		tumour: Tissue Area (µm²)	1432400
		BAJF107.2B	WT
		Name	Value		Name	Value		Name	Value		Name	Value		Name	Value		Name	Value		Name	Value		Name	Value
		Classified Area (mm²)	2.42204		Classified Area (mm²)	1.50981		Classified Area (mm²)	1.32778		Classified Area (mm²)	2.29834		Classified Area (mm²)	2.30656		Classified Area (mm²)	2.59289		Classified Area (mm²)	1.5698		Classified Area (mm²)	1.63957
		tumour Area (mm²)	1.66353		tumour Area (mm²)	1.19108		tumour Area (mm²)	1.3217		tumour Area (mm²)	1.94301		tumour Area (mm²)	2.21573		tumour Area (mm²)	2.57342		tumour Area (mm²)	1.2336		tumour Area (mm²)	1.60318
		empty Area (mm²)	0		empty Area (mm²)	0.01511		empty Area (mm²)	0		empty Area (mm²)	0.00022		empty Area (mm²)	0		empty Area (mm²)	0.00028		empty Area (mm²)	0		empty Area (mm²)	0
		necrosis Area (mm²)	0		necrosis Area (mm²)	0.00115		necrosis Area (mm²)	0		necrosis Area (mm²)	0		necrosis Area (mm²)	0		necrosis Area (mm²)	0.00062		necrosis Area (mm²)	0.00344		necrosis Area (mm²)	0.00307
		normal Area (mm²)	0.75851		normal Area (mm²)	0.30248		normal Area (mm²)	0.00608		normal Area (mm²)	0.35511		normal Area (mm²)	0.09082		normal Area (mm²)	0.01858		normal Area (mm²)	0.33277		normal Area (mm²)	0.03332
		Total Cells	6986		Total Cells	4481		Total Cells	5908		Total Cells	7792		Total Cells	9936		Total Cells	11901		Total Cells	5260		Total Cells	5995
		Stain 1 Positive Cells	713		Stain 1 Positive Cells	806		Stain 1 Positive Cells	2490		Stain 1 Positive Cells	1954		Stain 1 Positive Cells	2798		Stain 1 Positive Cells	4792		Stain 1 Positive Cells	630		Stain 1 Positive Cells	3807
		Stain 1 0+ Cells	6273		Stain 1 0+ Cells	3675		Stain 1 0+ Cells	3418		Stain 1 0+ Cells	5838		Stain 1 0+ Cells	7138		Stain 1 0+ Cells	7109		Stain 1 0+ Cells	4630		Stain 1 0+ Cells	2188
		Stain 1 1+ Cells	220		Stain 1 1+ Cells	327		Stain 1 1+ Cells	552		Stain 1 1+ Cells	651		Stain 1 1+ Cells	782		Stain 1 1+ Cells	1269		Stain 1 1+ Cells	182		Stain 1 1+ Cells	1197
		Stain 1 2+ Cells	189		Stain 1 2+ Cells	201		Stain 1 2+ Cells	794		Stain 1 2+ Cells	589		Stain 1 2+ Cells	695		Stain 1 2+ Cells	1507		Stain 1 2+ Cells	174		Stain 1 2+ Cells	1169
		Stain 1 3+ Cells	304		Stain 1 3+ Cells	278		Stain 1 3+ Cells	1144		Stain 1 3+ Cells	714		Stain 1 3+ Cells	1321		Stain 1 3+ Cells	2016		Stain 1 3+ Cells	274		Stain 1 3+ Cells	1441
		Stain 2 Positive Cells	0		Stain 2 Positive Cells	0		Stain 2 Positive Cells	0		Stain 2 Positive Cells	0		Stain 2 Positive Cells	0		Stain 2 Positive Cells	0		Stain 2 Positive Cells	0		Stain 2 Positive Cells	0
		Stain 2 0+ Cells	6986		Stain 2 0+ Cells	4481		Stain 2 0+ Cells	5908		Stain 2 0+ Cells	7792		Stain 2 0+ Cells	9936		Stain 2 0+ Cells	11901		Stain 2 0+ Cells	5260		Stain 2 0+ Cells	5995
		Stain 2 1+ Cells	0		Stain 2 1+ Cells	0		Stain 2 1+ Cells	0		Stain 2 1+ Cells	0		Stain 2 1+ Cells	0		Stain 2 1+ Cells	0		Stain 2 1+ Cells	0		Stain 2 1+ Cells	0
		Stain 2 2+ Cells	0		Stain 2 2+ Cells	0		Stain 2 2+ Cells	0		Stain 2 2+ Cells	0		Stain 2 2+ Cells	0		Stain 2 2+ Cells	0		Stain 2 2+ Cells	0		Stain 2 2+ Cells	0
		Stain 2 3+ Cells	0		Stain 2 3+ Cells	0		Stain 2 3+ Cells	0		Stain 2 3+ Cells	0		Stain 2 3+ Cells	0		Stain 2 3+ Cells	0		Stain 2 3+ Cells	0		Stain 2 3+ Cells	0
		Dual Positive Cells	0		Dual Positive Cells	0		Dual Positive Cells	0		Dual Positive Cells	0		Dual Positive Cells	0		Dual Positive Cells	0		Dual Positive Cells	0		Dual Positive Cells	0
		Dual Negative Cells	6273		Dual Negative Cells	3675		Dual Negative Cells	3418		Dual Negative Cells	5838		Dual Negative Cells	7138		Dual Negative Cells	7109		Dual Negative Cells	4630		Dual Negative Cells	2188
		% Stain 1 Positive Cells	10.2061		% Stain 1 Positive Cells	17.9871		% Stain 1 Positive Cells	42.1462		% Stain 1 Positive Cells	25.077		% Stain 1 Positive Cells	28.1602		% Stain 1 Positive Cells	40.2655		% Stain 1 Positive Cells	11.9772		% Stain 1 Positive Cells	63.5029		29.9153
		% Stain 1 0+ Cells	89.7939		% Stain 1 0+ Cells	82.0129		% Stain 1 0+ Cells	57.8538		% Stain 1 0+ Cells	74.923		% Stain 1 0+ Cells	71.8398		% Stain 1 0+ Cells	59.7345		% Stain 1 0+ Cells	88.0228		% Stain 1 0+ Cells	36.4971
		% Stain 1 1+ Cells	3.14916		% Stain 1 1+ Cells	7.29748		% Stain 1 1+ Cells	9.34326		% Stain 1 1+ Cells	8.35472		% Stain 1 1+ Cells	7.87037		% Stain 1 1+ Cells	10.663		% Stain 1 1+ Cells	3.46008		% Stain 1 1+ Cells	19.9666
		% Stain 1 2+ Cells	2.70541		% Stain 1 2+ Cells	4.48561		% Stain 1 2+ Cells	13.4394		% Stain 1 2+ Cells	7.55903		% Stain 1 2+ Cells	6.99477		% Stain 1 2+ Cells	12.6628		% Stain 1 2+ Cells	3.30798		% Stain 1 2+ Cells	19.4996
		% Stain 1 3+ Cells	4.35156		% Stain 1 3+ Cells	6.20397		% Stain 1 3+ Cells	19.3636		% Stain 1 3+ Cells	9.16324		% Stain 1 3+ Cells	13.2951		% Stain 1 3+ Cells	16.9398		% Stain 1 3+ Cells	5.20913		% Stain 1 3+ Cells	24.0367
		Stain 1 H-Score	21.6147		Stain 1 H-Score	34.8806		Stain 1 H-Score	94.3128		Stain 1 H-Score	50.9625		Stain 1 H-Score	61.7452		Stain 1 H-Score	86.8078		Stain 1 H-Score	25.7034		Stain 1 H-Score	131.076
		% Stain 2 Positive Cells	0		% Stain 2 Positive Cells	0		% Stain 2 Positive Cells	0		% Stain 2 Positive Cells	0		% Stain 2 Positive Cells	0		% Stain 2 Positive Cells	0		% Stain 2 Positive Cells	0		% Stain 2 Positive Cells	0
		% Stain 2 0+ Cells	100		% Stain 2 0+ Cells	100		% Stain 2 0+ Cells	100		% Stain 2 0+ Cells	100		% Stain 2 0+ Cells	100		% Stain 2 0+ Cells	100		% Stain 2 0+ Cells	100		% Stain 2 0+ Cells	100
		% Stain 2 1+ Cells	0		% Stain 2 1+ Cells	0		% Stain 2 1+ Cells	0		% Stain 2 1+ Cells	0		% Stain 2 1+ Cells	0		% Stain 2 1+ Cells	0		% Stain 2 1+ Cells	0		% Stain 2 1+ Cells	0
		% Stain 2 2+ Cells	0		% Stain 2 2+ Cells	0		% Stain 2 2+ Cells	0		% Stain 2 2+ Cells	0		% Stain 2 2+ Cells	0		% Stain 2 2+ Cells	0		% Stain 2 2+ Cells	0		% Stain 2 2+ Cells	0
		% Stain 2 3+ Cells	0		% Stain 2 3+ Cells	0		% Stain 2 3+ Cells	0		% Stain 2 3+ Cells	0		% Stain 2 3+ Cells	0		% Stain 2 3+ Cells	0		% Stain 2 3+ Cells	0		% Stain 2 3+ Cells	0
		Stain 2 H-Score	0		Stain 2 H-Score	0		Stain 2 H-Score	0		Stain 2 H-Score	0		Stain 2 H-Score	0		Stain 2 H-Score	0		Stain 2 H-Score	0		Stain 2 H-Score	0
		% Dual Positive Cells	0		% Dual Positive Cells	0		% Dual Positive Cells	0		% Dual Positive Cells	0		% Dual Positive Cells	0		% Dual Positive Cells	0		% Dual Positive Cells	0		% Dual Positive Cells	0
		% Dual Negative Cells	89.7939		% Dual Negative Cells	82.0129		% Dual Negative Cells	57.8538		% Dual Negative Cells	74.923		% Dual Negative Cells	71.8398		% Dual Negative Cells	59.7345		% Dual Negative Cells	88.0228		% Dual Negative Cells	36.4971
		Avg Stain 1 Nuclear OD	0.0771763		Avg Stain 1 Nuclear OD	0.105471		Avg Stain 1 Nuclear OD	0.235643		Avg Stain 1 Nuclear OD	0.13915		Avg Stain 1 Nuclear OD	0.169264		Avg Stain 1 Nuclear OD	0.217442		Avg Stain 1 Nuclear OD	0.0872381		Avg Stain 1 Nuclear OD	0.306099
		Avg Stain 2 Nuclear OD	0.0419863		Avg Stain 2 Nuclear OD	0.0414942		Avg Stain 2 Nuclear OD	0.0474935		Avg Stain 2 Nuclear OD	0.043839		Avg Stain 2 Nuclear OD	0.0465956		Avg Stain 2 Nuclear OD	0.0468562		Avg Stain 2 Nuclear OD	0.0414752		Avg Stain 2 Nuclear OD	0.0532343
		Avg Stain 1 Cytoplasmic OD	0.038604		Avg Stain 1 Cytoplasmic OD	0.0442476		Avg Stain 1 Cytoplasmic OD	0.0671284		Avg Stain 1 Cytoplasmic OD	0.0489645		Avg Stain 1 Cytoplasmic OD	0.0540637		Avg Stain 1 Cytoplasmic OD	0.0638028		Avg Stain 1 Cytoplasmic OD	0.0406203		Avg Stain 1 Cytoplasmic OD	0.0856525
		Avg Stain 2 Cytoplasmic OD	0.0323411		Avg Stain 2 Cytoplasmic OD	0.0323621		Avg Stain 2 Cytoplasmic OD	0.032032		Avg Stain 2 Cytoplasmic OD	0.0323057		Avg Stain 2 Cytoplasmic OD	0.0325413		Avg Stain 2 Cytoplasmic OD	0.0322858		Avg Stain 2 Cytoplasmic OD	0.0320702		Avg Stain 2 Cytoplasmic OD	0.0323326
		Avg Cell Area (µm²)	108.932		Avg Cell Area (µm²)	113.8		Avg Cell Area (µm²)	110.489		Avg Cell Area (µm²)	111.143		Avg Cell Area (µm²)	109.088		Avg Cell Area (µm²)	104.001		Avg Cell Area (µm²)	108.427		Avg Cell Area (µm²)	124.496
		Avg Cytoplasm Area (µm²)	81.921		Avg Cytoplasm Area (µm²)	86.344		Avg Cytoplasm Area (µm²)	79.8276		Avg Cytoplasm Area (µm²)	84.539		Avg Cytoplasm Area (µm²)	79.4078		Avg Cytoplasm Area (µm²)	76.8541		Avg Cytoplasm Area (µm²)	81.8648		Avg Cytoplasm Area (µm²)	90.332
		Avg Nucleus Area (µm²)	27.0112		Avg Nucleus Area (µm²)	27.4564		Avg Nucleus Area (µm²)	30.6615		Avg Nucleus Area (µm²)	26.6038		Avg Nucleus Area (µm²)	29.6807		Avg Nucleus Area (µm²)	27.1473		Avg Nucleus Area (µm²)	26.5623		Avg Nucleus Area (µm²)	34.1636
		Avg Nucleus Perimeter (µm)	10.582		Avg Nucleus Perimeter (µm)	10.7234		Avg Nucleus Perimeter (µm)	11.9233		Avg Nucleus Perimeter (µm)	10.4631		Avg Nucleus Perimeter (µm)	11.584		Avg Nucleus Perimeter (µm)	10.6553		Avg Nucleus Perimeter (µm)	10.4545		Avg Nucleus Perimeter (µm)	13.1938
		Avg Nucleus Roundness	0.697454		Avg Nucleus Roundness	0.69783		Avg Nucleus Roundness	0.692952		Avg Nucleus Roundness	0.702513		Avg Nucleus Roundness	0.689718		Avg Nucleus Roundness	0.690335		Avg Nucleus Roundness	0.694975		Avg Nucleus Roundness	0.70048
		Tissue Area (µm²)	1726610		Tissue Area (µm²)	1208530		Tissue Area (µm²)	1323860		Tissue Area (µm²)	1974460		Tissue Area (µm²)	2230540		Tissue Area (µm²)	2560980		Tissue Area (µm²)	1266500		Tissue Area (µm²)	1604470
		tumour: Total Cells	6986		tumour: Total Cells	4481		tumour: Total Cells	5908		tumour: Total Cells	7792		tumour: Total Cells	9936		tumour: Total Cells	11901		tumour: Total Cells	5260		tumour: Total Cells	5995
		tumour: Stain 1 Positive Cells	713		tumour: Stain 1 Positive Cells	806		tumour: Stain 1 Positive Cells	2490		tumour: Stain 1 Positive Cells	1954		tumour: Stain 1 Positive Cells	2798		tumour: Stain 1 Positive Cells	4792		tumour: Stain 1 Positive Cells	630		tumour: Stain 1 Positive Cells	3807
		tumour: Stain 1 0+ Cells	6273		tumour: Stain 1 0+ Cells	3675		tumour: Stain 1 0+ Cells	3418		tumour: Stain 1 0+ Cells	5838		tumour: Stain 1 0+ Cells	7138		tumour: Stain 1 0+ Cells	7109		tumour: Stain 1 0+ Cells	4630		tumour: Stain 1 0+ Cells	2188
		tumour: Stain 1 1+ Cells	220		tumour: Stain 1 1+ Cells	327		tumour: Stain 1 1+ Cells	552		tumour: Stain 1 1+ Cells	651		tumour: Stain 1 1+ Cells	782		tumour: Stain 1 1+ Cells	1269		tumour: Stain 1 1+ Cells	182		tumour: Stain 1 1+ Cells	1197
		tumour: Stain 1 2+ Cells	189		tumour: Stain 1 2+ Cells	201		tumour: Stain 1 2+ Cells	794		tumour: Stain 1 2+ Cells	589		tumour: Stain 1 2+ Cells	695		tumour: Stain 1 2+ Cells	1507		tumour: Stain 1 2+ Cells	174		tumour: Stain 1 2+ Cells	1169
		tumour: Stain 1 3+ Cells	304		tumour: Stain 1 3+ Cells	278		tumour: Stain 1 3+ Cells	1144		tumour: Stain 1 3+ Cells	714		tumour: Stain 1 3+ Cells	1321		tumour: Stain 1 3+ Cells	2016		tumour: Stain 1 3+ Cells	274		tumour: Stain 1 3+ Cells	1441
		tumour: Stain 2 Positive Cells	0		tumour: Stain 2 Positive Cells	0		tumour: Stain 2 Positive Cells	0		tumour: Stain 2 Positive Cells	0		tumour: Stain 2 Positive Cells	0		tumour: Stain 2 Positive Cells	0		tumour: Stain 2 Positive Cells	0		tumour: Stain 2 Positive Cells	0
		tumour: Stain 2 0+ Cells	6986		tumour: Stain 2 0+ Cells	4481		tumour: Stain 2 0+ Cells	5908		tumour: Stain 2 0+ Cells	7792		tumour: Stain 2 0+ Cells	9936		tumour: Stain 2 0+ Cells	11901		tumour: Stain 2 0+ Cells	5260		tumour: Stain 2 0+ Cells	5995
		tumour: Stain 2 1+ Cells	0		tumour: Stain 2 1+ Cells	0		tumour: Stain 2 1+ Cells	0		tumour: Stain 2 1+ Cells	0		tumour: Stain 2 1+ Cells	0		tumour: Stain 2 1+ Cells	0		tumour: Stain 2 1+ Cells	0		tumour: Stain 2 1+ Cells	0
		tumour: Stain 2 2+ Cells	0		tumour: Stain 2 2+ Cells	0		tumour: Stain 2 2+ Cells	0		tumour: Stain 2 2+ Cells	0		tumour: Stain 2 2+ Cells	0		tumour: Stain 2 2+ Cells	0		tumour: Stain 2 2+ Cells	0		tumour: Stain 2 2+ Cells	0
		tumour: Stain 2 3+ Cells	0		tumour: Stain 2 3+ Cells	0		tumour: Stain 2 3+ Cells	0		tumour: Stain 2 3+ Cells	0		tumour: Stain 2 3+ Cells	0		tumour: Stain 2 3+ Cells	0		tumour: Stain 2 3+ Cells	0		tumour: Stain 2 3+ Cells	0
		tumour: Dual Positive Cells	0		tumour: Dual Positive Cells	0		tumour: Dual Positive Cells	0		tumour: Dual Positive Cells	0		tumour: Dual Positive Cells	0		tumour: Dual Positive Cells	0		tumour: Dual Positive Cells	0		tumour: Dual Positive Cells	0
		tumour: Dual Negative Cells	6273		tumour: Dual Negative Cells	3675		tumour: Dual Negative Cells	3418		tumour: Dual Negative Cells	5838		tumour: Dual Negative Cells	7138		tumour: Dual Negative Cells	7109		tumour: Dual Negative Cells	4630		tumour: Dual Negative Cells	2188
		tumour: % Stain 1 Positive Cells	10.2061		tumour: % Stain 1 Positive Cells	17.9871		tumour: % Stain 1 Positive Cells	42.1462		tumour: % Stain 1 Positive Cells	25.077		tumour: % Stain 1 Positive Cells	28.1602		tumour: % Stain 1 Positive Cells	40.2655		tumour: % Stain 1 Positive Cells	11.9772		tumour: % Stain 1 Positive Cells	63.5029
		tumour: % Stain 1 0+ Cells	89.7939		tumour: % Stain 1 0+ Cells	82.0129		tumour: % Stain 1 0+ Cells	57.8538		tumour: % Stain 1 0+ Cells	74.923		tumour: % Stain 1 0+ Cells	71.8398		tumour: % Stain 1 0+ Cells	59.7345		tumour: % Stain 1 0+ Cells	88.0228		tumour: % Stain 1 0+ Cells	36.4971
		tumour: % Stain 1 1+ Cells	3.14916		tumour: % Stain 1 1+ Cells	7.29748		tumour: % Stain 1 1+ Cells	9.34326		tumour: % Stain 1 1+ Cells	8.35472		tumour: % Stain 1 1+ Cells	7.87037		tumour: % Stain 1 1+ Cells	10.663		tumour: % Stain 1 1+ Cells	3.46008		tumour: % Stain 1 1+ Cells	19.9666
		tumour: % Stain 1 2+ Cells	2.70541		tumour: % Stain 1 2+ Cells	4.48561		tumour: % Stain 1 2+ Cells	13.4394		tumour: % Stain 1 2+ Cells	7.55903		tumour: % Stain 1 2+ Cells	6.99477		tumour: % Stain 1 2+ Cells	12.6628		tumour: % Stain 1 2+ Cells	3.30798		tumour: % Stain 1 2+ Cells	19.4996
		tumour: % Stain 1 3+ Cells	4.35156		tumour: % Stain 1 3+ Cells	6.20397		tumour: % Stain 1 3+ Cells	19.3636		tumour: % Stain 1 3+ Cells	9.16324		tumour: % Stain 1 3+ Cells	13.2951		tumour: % Stain 1 3+ Cells	16.9398		tumour: % Stain 1 3+ Cells	5.20913		tumour: % Stain 1 3+ Cells	24.0367
		tumour: Stain 1 H-Score	21.6147		tumour: Stain 1 H-Score	34.8806		tumour: Stain 1 H-Score	94.3128		tumour: Stain 1 H-Score	50.9625		tumour: Stain 1 H-Score	61.7452		tumour: Stain 1 H-Score	86.8078		tumour: Stain 1 H-Score	25.7034		tumour: Stain 1 H-Score	131.076
		tumour: % Stain 2 Positive Cells	0		tumour: % Stain 2 Positive Cells	0		tumour: % Stain 2 Positive Cells	0		tumour: % Stain 2 Positive Cells	0		tumour: % Stain 2 Positive Cells	0		tumour: % Stain 2 Positive Cells	0		tumour: % Stain 2 Positive Cells	0		tumour: % Stain 2 Positive Cells	0
		tumour: % Stain 2 0+ Cells	100		tumour: % Stain 2 0+ Cells	100		tumour: % Stain 2 0+ Cells	100		tumour: % Stain 2 0+ Cells	100		tumour: % Stain 2 0+ Cells	100		tumour: % Stain 2 0+ Cells	100		tumour: % Stain 2 0+ Cells	100		tumour: % Stain 2 0+ Cells	100
		tumour: % Stain 2 1+ Cells	0		tumour: % Stain 2 1+ Cells	0		tumour: % Stain 2 1+ Cells	0		tumour: % Stain 2 1+ Cells	0		tumour: % Stain 2 1+ Cells	0		tumour: % Stain 2 1+ Cells	0		tumour: % Stain 2 1+ Cells	0		tumour: % Stain 2 1+ Cells	0
		tumour: % Stain 2 2+ Cells	0		tumour: % Stain 2 2+ Cells	0		tumour: % Stain 2 2+ Cells	0		tumour: % Stain 2 2+ Cells	0		tumour: % Stain 2 2+ Cells	0		tumour: % Stain 2 2+ Cells	0		tumour: % Stain 2 2+ Cells	0		tumour: % Stain 2 2+ Cells	0
		tumour: % Stain 2 3+ Cells	0		tumour: % Stain 2 3+ Cells	0		tumour: % Stain 2 3+ Cells	0		tumour: % Stain 2 3+ Cells	0		tumour: % Stain 2 3+ Cells	0		tumour: % Stain 2 3+ Cells	0		tumour: % Stain 2 3+ Cells	0		tumour: % Stain 2 3+ Cells	0
		tumour: Stain 2 H-Score	0		tumour: Stain 2 H-Score	0		tumour: Stain 2 H-Score	0		tumour: Stain 2 H-Score	0		tumour: Stain 2 H-Score	0		tumour: Stain 2 H-Score	0		tumour: Stain 2 H-Score	0		tumour: Stain 2 H-Score	0
		tumour: % Dual Positive Cells	0		tumour: % Dual Positive Cells	0		tumour: % Dual Positive Cells	0		tumour: % Dual Positive Cells	0		tumour: % Dual Positive Cells	0		tumour: % Dual Positive Cells	0		tumour: % Dual Positive Cells	0		tumour: % Dual Positive Cells	0
		tumour: % Dual Negative Cells	89.7939		tumour: % Dual Negative Cells	82.0129		tumour: % Dual Negative Cells	57.8538		tumour: % Dual Negative Cells	74.923		tumour: % Dual Negative Cells	71.8398		tumour: % Dual Negative Cells	59.7345		tumour: % Dual Negative Cells	88.0228		tumour: % Dual Negative Cells	36.4971
		tumour: Avg Stain 1 Nuclear OD	0.0771763		tumour: Avg Stain 1 Nuclear OD	0.105471		tumour: Avg Stain 1 Nuclear OD	0.235643		tumour: Avg Stain 1 Nuclear OD	0.13915		tumour: Avg Stain 1 Nuclear OD	0.169264		tumour: Avg Stain 1 Nuclear OD	0.217442		tumour: Avg Stain 1 Nuclear OD	0.0872381		tumour: Avg Stain 1 Nuclear OD	0.306099
		tumour: Avg Stain 2 Nuclear OD	0.0419863		tumour: Avg Stain 2 Nuclear OD	0.0414942		tumour: Avg Stain 2 Nuclear OD	0.0474935		tumour: Avg Stain 2 Nuclear OD	0.043839		tumour: Avg Stain 2 Nuclear OD	0.0465956		tumour: Avg Stain 2 Nuclear OD	0.0468562		tumour: Avg Stain 2 Nuclear OD	0.0414752		tumour: Avg Stain 2 Nuclear OD	0.0532343
		tumour: Avg Stain 1 Cytoplasmic OD	0.038604		tumour: Avg Stain 1 Cytoplasmic OD	0.0442476		tumour: Avg Stain 1 Cytoplasmic OD	0.0671284		tumour: Avg Stain 1 Cytoplasmic OD	0.0489645		tumour: Avg Stain 1 Cytoplasmic OD	0.0540637		tumour: Avg Stain 1 Cytoplasmic OD	0.0638028		tumour: Avg Stain 1 Cytoplasmic OD	0.0406203		tumour: Avg Stain 1 Cytoplasmic OD	0.0856525
		tumour: Avg Stain 2 Cytoplasmic OD	0.0323411		tumour: Avg Stain 2 Cytoplasmic OD	0.0323621		tumour: Avg Stain 2 Cytoplasmic OD	0.032032		tumour: Avg Stain 2 Cytoplasmic OD	0.0323057		tumour: Avg Stain 2 Cytoplasmic OD	0.0325413		tumour: Avg Stain 2 Cytoplasmic OD	0.0322858		tumour: Avg Stain 2 Cytoplasmic OD	0.0320702		tumour: Avg Stain 2 Cytoplasmic OD	0.0323326
		tumour: Avg Cell Area (µm²)	108.932		tumour: Avg Cell Area (µm²)	113.8		tumour: Avg Cell Area (µm²)	110.489		tumour: Avg Cell Area (µm²)	111.143		tumour: Avg Cell Area (µm²)	109.088		tumour: Avg Cell Area (µm²)	104.001		tumour: Avg Cell Area (µm²)	108.427		tumour: Avg Cell Area (µm²)	124.496
		tumour: Avg Cytoplasm Area (µm²)	81.921		tumour: Avg Cytoplasm Area (µm²)	86.344		tumour: Avg Cytoplasm Area (µm²)	79.8276		tumour: Avg Cytoplasm Area (µm²)	84.539		tumour: Avg Cytoplasm Area (µm²)	79.4078		tumour: Avg Cytoplasm Area (µm²)	76.8541		tumour: Avg Cytoplasm Area (µm²)	81.8648		tumour: Avg Cytoplasm Area (µm²)	90.332
		tumour: Avg Nucleus Area (µm²)	27.0112		tumour: Avg Nucleus Area (µm²)	27.4564		tumour: Avg Nucleus Area (µm²)	30.6615		tumour: Avg Nucleus Area (µm²)	26.6038		tumour: Avg Nucleus Area (µm²)	29.6807		tumour: Avg Nucleus Area (µm²)	27.1473		tumour: Avg Nucleus Area (µm²)	26.5623		tumour: Avg Nucleus Area (µm²)	34.1636
		tumour: Avg Nucleus Perimeter (µm)	10.582		tumour: Avg Nucleus Perimeter (µm)	10.7234		tumour: Avg Nucleus Perimeter (µm)	11.9233		tumour: Avg Nucleus Perimeter (µm)	10.4631		tumour: Avg Nucleus Perimeter (µm)	11.584		tumour: Avg Nucleus Perimeter (µm)	10.6553		tumour: Avg Nucleus Perimeter (µm)	10.4545		tumour: Avg Nucleus Perimeter (µm)	13.1938
		tumour: Avg Nucleus Roundness	0.697454		tumour: Avg Nucleus Roundness	0.69783		tumour: Avg Nucleus Roundness	0.692952		tumour: Avg Nucleus Roundness	0.702513		tumour: Avg Nucleus Roundness	0.689718		tumour: Avg Nucleus Roundness	0.690335		tumour: Avg Nucleus Roundness	0.694975		tumour: Avg Nucleus Roundness	0.70048
		tumour: Tissue Area (µm²)	1726610		tumour: Tissue Area (µm²)	1208530		tumour: Tissue Area (µm²)	1323860		tumour: Tissue Area (µm²)	1974460		tumour: Tissue Area (µm²)	2230540		tumour: Tissue Area (µm²)	2560980		tumour: Tissue Area (µm²)	1266500		tumour: Tissue Area (µm²)	1604470
		BSNA32.5B	WT
		Name	Value		Name	Value		Name	Value		Name	Value		Name	Value		Name	Value		Name	Value		Name	Value
		Classified Area (mm²)	2.18146		Classified Area (mm²)	0.75157		Classified Area (mm²)	0.96682		Classified Area (mm²)	1.51864		Classified Area (mm²)	0.97704		Classified Area (mm²)	1.36638		Classified Area (mm²)	1.51202		Classified Area (mm²)	2.34998
		tumour Area (mm²)	2.16523		tumour Area (mm²)	0.75028		tumour Area (mm²)	0.92335		tumour Area (mm²)	1.48676		tumour Area (mm²)	0.97195		tumour Area (mm²)	1.32852		tumour Area (mm²)	1.31993		tumour Area (mm²)	2.16801
		empty Area (mm²)	0.00194		empty Area (mm²)	0.00061		empty Area (mm²)	0		empty Area (mm²)	0.00304		empty Area (mm²)	5e-05		empty Area (mm²)	0.00022		empty Area (mm²)	0		empty Area (mm²)	0.01104
		necrosis Area (mm²)	0.00012		necrosis Area (mm²)	0		necrosis Area (mm²)	0		necrosis Area (mm²)	0.00011		necrosis Area (mm²)	0		necrosis Area (mm²)	8e-05		necrosis Area (mm²)	0		necrosis Area (mm²)	0.00064
		normal Area (mm²)	0.01418		normal Area (mm²)	0.00069		normal Area (mm²)	0.04346		normal Area (mm²)	0.02874		normal Area (mm²)	0.00504		normal Area (mm²)	0.03756		normal Area (mm²)	0.19209		normal Area (mm²)	0.17028
		Total Cells	7924		Total Cells	2879		Total Cells	3525		Total Cells	6428		Total Cells	4168		Total Cells	5585		Total Cells	5799		Total Cells	8745
		Stain 1 Positive Cells	3284		Stain 1 Positive Cells	1632		Stain 1 Positive Cells	704		Stain 1 Positive Cells	1962		Stain 1 Positive Cells	2009		Stain 1 Positive Cells	1707		Stain 1 Positive Cells	1367		Stain 1 Positive Cells	2272
		Stain 1 0+ Cells	4640		Stain 1 0+ Cells	1247		Stain 1 0+ Cells	2821		Stain 1 0+ Cells	4466		Stain 1 0+ Cells	2159		Stain 1 0+ Cells	3878		Stain 1 0+ Cells	4432		Stain 1 0+ Cells	6473
		Stain 1 1+ Cells	1033		Stain 1 1+ Cells	478		Stain 1 1+ Cells	244		Stain 1 1+ Cells	565		Stain 1 1+ Cells	463		Stain 1 1+ Cells	444		Stain 1 1+ Cells	431		Stain 1 1+ Cells	751
		Stain 1 2+ Cells	1078		Stain 1 2+ Cells	589		Stain 1 2+ Cells	222		Stain 1 2+ Cells	719		Stain 1 2+ Cells	654		Stain 1 2+ Cells	537		Stain 1 2+ Cells	475		Stain 1 2+ Cells	687
		Stain 1 3+ Cells	1173		Stain 1 3+ Cells	565		Stain 1 3+ Cells	238		Stain 1 3+ Cells	678		Stain 1 3+ Cells	892		Stain 1 3+ Cells	726		Stain 1 3+ Cells	461		Stain 1 3+ Cells	834
		Stain 2 Positive Cells	0		Stain 2 Positive Cells	0		Stain 2 Positive Cells	0		Stain 2 Positive Cells	0		Stain 2 Positive Cells	0		Stain 2 Positive Cells	0		Stain 2 Positive Cells	0		Stain 2 Positive Cells	0
		Stain 2 0+ Cells	7924		Stain 2 0+ Cells	2879		Stain 2 0+ Cells	3525		Stain 2 0+ Cells	6428		Stain 2 0+ Cells	4168		Stain 2 0+ Cells	5585		Stain 2 0+ Cells	5799		Stain 2 0+ Cells	8745
		Stain 2 1+ Cells	0		Stain 2 1+ Cells	0		Stain 2 1+ Cells	0		Stain 2 1+ Cells	0		Stain 2 1+ Cells	0		Stain 2 1+ Cells	0		Stain 2 1+ Cells	0		Stain 2 1+ Cells	0
		Stain 2 2+ Cells	0		Stain 2 2+ Cells	0		Stain 2 2+ Cells	0		Stain 2 2+ Cells	0		Stain 2 2+ Cells	0		Stain 2 2+ Cells	0		Stain 2 2+ Cells	0		Stain 2 2+ Cells	0
		Stain 2 3+ Cells	0		Stain 2 3+ Cells	0		Stain 2 3+ Cells	0		Stain 2 3+ Cells	0		Stain 2 3+ Cells	0		Stain 2 3+ Cells	0		Stain 2 3+ Cells	0		Stain 2 3+ Cells	0
		Dual Positive Cells	0		Dual Positive Cells	0		Dual Positive Cells	0		Dual Positive Cells	0		Dual Positive Cells	0		Dual Positive Cells	0		Dual Positive Cells	0		Dual Positive Cells	0
		Dual Negative Cells	4640		Dual Negative Cells	1247		Dual Negative Cells	2821		Dual Negative Cells	4466		Dual Negative Cells	2159		Dual Negative Cells	3878		Dual Negative Cells	4432		Dual Negative Cells	6473
		% Stain 1 Positive Cells	41.4437		% Stain 1 Positive Cells	56.6863		% Stain 1 Positive Cells	19.9716		% Stain 1 Positive Cells	30.5227		% Stain 1 Positive Cells	48.2006		% Stain 1 Positive Cells	30.564		% Stain 1 Positive Cells	23.573		% Stain 1 Positive Cells	25.9806		34.6178
		% Stain 1 0+ Cells	58.5563		% Stain 1 0+ Cells	43.3137		% Stain 1 0+ Cells	80.0284		% Stain 1 0+ Cells	69.4773		% Stain 1 0+ Cells	51.7994		% Stain 1 0+ Cells	69.436		% Stain 1 0+ Cells	76.427		% Stain 1 0+ Cells	74.0194
		% Stain 1 1+ Cells	13.0363		% Stain 1 1+ Cells	16.603		% Stain 1 1+ Cells	6.92199		% Stain 1 1+ Cells	8.78967		% Stain 1 1+ Cells	11.1084		% Stain 1 1+ Cells	7.94987		% Stain 1 1+ Cells	7.43232		% Stain 1 1+ Cells	8.58776
		% Stain 1 2+ Cells	13.6042		% Stain 1 2+ Cells	20.4585		% Stain 1 2+ Cells	6.29787		% Stain 1 2+ Cells	11.1854		% Stain 1 2+ Cells	15.691		% Stain 1 2+ Cells	9.61504		% Stain 1 2+ Cells	8.19107		% Stain 1 2+ Cells	7.85592
		% Stain 1 3+ Cells	14.8031		% Stain 1 3+ Cells	19.6249		% Stain 1 3+ Cells	6.75177		% Stain 1 3+ Cells	10.5476		% Stain 1 3+ Cells	21.4012		% Stain 1 3+ Cells	12.9991		% Stain 1 3+ Cells	7.94965		% Stain 1 3+ Cells	9.53688
		Stain 1 H-Score	84.6542		Stain 1 H-Score	116.395		Stain 1 H-Score	39.773		Stain 1 H-Score	62.8034		Stain 1 H-Score	106.694		Stain 1 H-Score	66.1773		Stain 1 H-Score	47.6634		Stain 1 H-Score	52.9102
		% Stain 2 Positive Cells	0		% Stain 2 Positive Cells	0		% Stain 2 Positive Cells	0		% Stain 2 Positive Cells	0		% Stain 2 Positive Cells	0		% Stain 2 Positive Cells	0		% Stain 2 Positive Cells	0		% Stain 2 Positive Cells	0
		% Stain 2 0+ Cells	100		% Stain 2 0+ Cells	100		% Stain 2 0+ Cells	100		% Stain 2 0+ Cells	100		% Stain 2 0+ Cells	100		% Stain 2 0+ Cells	100		% Stain 2 0+ Cells	100		% Stain 2 0+ Cells	100
		% Stain 2 1+ Cells	0		% Stain 2 1+ Cells	0		% Stain 2 1+ Cells	0		% Stain 2 1+ Cells	0		% Stain 2 1+ Cells	0		% Stain 2 1+ Cells	0		% Stain 2 1+ Cells	0		% Stain 2 1+ Cells	0
		% Stain 2 2+ Cells	0		% Stain 2 2+ Cells	0		% Stain 2 2+ Cells	0		% Stain 2 2+ Cells	0		% Stain 2 2+ Cells	0		% Stain 2 2+ Cells	0		% Stain 2 2+ Cells	0		% Stain 2 2+ Cells	0
		% Stain 2 3+ Cells	0		% Stain 2 3+ Cells	0		% Stain 2 3+ Cells	0		% Stain 2 3+ Cells	0		% Stain 2 3+ Cells	0		% Stain 2 3+ Cells	0		% Stain 2 3+ Cells	0		% Stain 2 3+ Cells	0
		Stain 2 H-Score	0		Stain 2 H-Score	0		Stain 2 H-Score	0		Stain 2 H-Score	0		Stain 2 H-Score	0		Stain 2 H-Score	0		Stain 2 H-Score	0		Stain 2 H-Score	0
		% Dual Positive Cells	0		% Dual Positive Cells	0		% Dual Positive Cells	0		% Dual Positive Cells	0		% Dual Positive Cells	0		% Dual Positive Cells	0		% Dual Positive Cells	0		% Dual Positive Cells	0
		% Dual Negative Cells	58.5563		% Dual Negative Cells	43.3137		% Dual Negative Cells	80.0284		% Dual Negative Cells	69.4773		% Dual Negative Cells	51.7994		% Dual Negative Cells	69.436		% Dual Negative Cells	76.427		% Dual Negative Cells	74.0194
		Avg Stain 1 Nuclear OD	0.212856		Avg Stain 1 Nuclear OD	0.278639		Avg Stain 1 Nuclear OD	0.115616		Avg Stain 1 Nuclear OD	0.162366		Avg Stain 1 Nuclear OD	0.264531		Avg Stain 1 Nuclear OD	0.175881		Avg Stain 1 Nuclear OD	0.130078		Avg Stain 1 Nuclear OD	0.146187
		Avg Stain 2 Nuclear OD	0.0480225		Avg Stain 2 Nuclear OD	0.0516267		Avg Stain 2 Nuclear OD	0.0416375		Avg Stain 2 Nuclear OD	0.0447159		Avg Stain 2 Nuclear OD	0.0518988		Avg Stain 2 Nuclear OD	0.0455678		Avg Stain 2 Nuclear OD	0.0425009		Avg Stain 2 Nuclear OD	0.0432371
		Avg Stain 1 Cytoplasmic OD	0.0618148		Avg Stain 1 Cytoplasmic OD	0.0781547		Avg Stain 1 Cytoplasmic OD	0.0446005		Avg Stain 1 Cytoplasmic OD	0.0521637		Avg Stain 1 Cytoplasmic OD	0.073586		Avg Stain 1 Cytoplasmic OD	0.0541316		Avg Stain 1 Cytoplasmic OD	0.0481378		Avg Stain 1 Cytoplasmic OD	0.0523499
		Avg Stain 2 Cytoplasmic OD	0.0321253		Avg Stain 2 Cytoplasmic OD	0.0324242		Avg Stain 2 Cytoplasmic OD	0.0319801		Avg Stain 2 Cytoplasmic OD	0.032433		Avg Stain 2 Cytoplasmic OD	0.0322381		Avg Stain 2 Cytoplasmic OD	0.0321146		Avg Stain 2 Cytoplasmic OD	0.0324843		Avg Stain 2 Cytoplasmic OD	0.0320115
		Avg Cell Area (µm²)	110.413		Avg Cell Area (µm²)	113.771		Avg Cell Area (µm²)	107.17		Avg Cell Area (µm²)	99.7522		Avg Cell Area (µm²)	107.565		Avg Cell Area (µm²)	102.372		Avg Cell Area (µm²)	102.869		Avg Cell Area (µm²)	107.784
		Avg Cytoplasm Area (µm²)	84.1804		Avg Cytoplasm Area (µm²)	83.1155		Avg Cytoplasm Area (µm²)	83.1879		Avg Cytoplasm Area (µm²)	76.1526		Avg Cytoplasm Area (µm²)	78.8346		Avg Cytoplasm Area (µm²)	78.9096		Avg Cytoplasm Area (µm²)	78.2303		Avg Cytoplasm Area (µm²)	80.2823
		Avg Nucleus Area (µm²)	26.2324		Avg Nucleus Area (µm²)	30.655		Avg Nucleus Area (µm²)	23.982		Avg Nucleus Area (µm²)	23.5995		Avg Nucleus Area (µm²)	28.7306		Avg Nucleus Area (µm²)	23.4628		Avg Nucleus Area (µm²)	24.6388		Avg Nucleus Area (µm²)	27.5019
		Avg Nucleus Perimeter (µm)	10.2501		Avg Nucleus Perimeter (µm)	11.8709		Avg Nucleus Perimeter (µm)	9.4457		Avg Nucleus Perimeter (µm)	9.31583		Avg Nucleus Perimeter (µm)	11.1715		Avg Nucleus Perimeter (µm)	9.26385		Avg Nucleus Perimeter (µm)	9.70827		Avg Nucleus Perimeter (µm)	10.7373
		Avg Nucleus Roundness	0.701658		Avg Nucleus Roundness	0.69803		Avg Nucleus Roundness	0.699551		Avg Nucleus Roundness	0.692829		Avg Nucleus Roundness	0.693871		Avg Nucleus Roundness	0.695433		Avg Nucleus Roundness	0.690229		Avg Nucleus Roundness	0.70194
		Tissue Area (µm²)	2102020		Tissue Area (µm²)	736560		Tissue Area (µm²)	921294		Tissue Area (µm²)	1424670		Tissue Area (µm²)	956039		Tissue Area (µm²)	1317420		Tissue Area (µm²)	1333270		Tissue Area (µm²)	2149000
		tumour: Total Cells	7924		tumour: Total Cells	2879		tumour: Total Cells	3525		tumour: Total Cells	6428		tumour: Total Cells	4168		tumour: Total Cells	5585		tumour: Total Cells	5799		tumour: Total Cells	8745
		tumour: Stain 1 Positive Cells	3284		tumour: Stain 1 Positive Cells	1632		tumour: Stain 1 Positive Cells	704		tumour: Stain 1 Positive Cells	1962		tumour: Stain 1 Positive Cells	2009		tumour: Stain 1 Positive Cells	1707		tumour: Stain 1 Positive Cells	1367		tumour: Stain 1 Positive Cells	2272
		tumour: Stain 1 0+ Cells	4640		tumour: Stain 1 0+ Cells	1247		tumour: Stain 1 0+ Cells	2821		tumour: Stain 1 0+ Cells	4466		tumour: Stain 1 0+ Cells	2159		tumour: Stain 1 0+ Cells	3878		tumour: Stain 1 0+ Cells	4432		tumour: Stain 1 0+ Cells	6473
		tumour: Stain 1 1+ Cells	1033		tumour: Stain 1 1+ Cells	478		tumour: Stain 1 1+ Cells	244		tumour: Stain 1 1+ Cells	565		tumour: Stain 1 1+ Cells	463		tumour: Stain 1 1+ Cells	444		tumour: Stain 1 1+ Cells	431		tumour: Stain 1 1+ Cells	751
		tumour: Stain 1 2+ Cells	1078		tumour: Stain 1 2+ Cells	589		tumour: Stain 1 2+ Cells	222		tumour: Stain 1 2+ Cells	719		tumour: Stain 1 2+ Cells	654		tumour: Stain 1 2+ Cells	537		tumour: Stain 1 2+ Cells	475		tumour: Stain 1 2+ Cells	687
		tumour: Stain 1 3+ Cells	1173		tumour: Stain 1 3+ Cells	565		tumour: Stain 1 3+ Cells	238		tumour: Stain 1 3+ Cells	678		tumour: Stain 1 3+ Cells	892		tumour: Stain 1 3+ Cells	726		tumour: Stain 1 3+ Cells	461		tumour: Stain 1 3+ Cells	834
		tumour: Stain 2 Positive Cells	0		tumour: Stain 2 Positive Cells	0		tumour: Stain 2 Positive Cells	0		tumour: Stain 2 Positive Cells	0		tumour: Stain 2 Positive Cells	0		tumour: Stain 2 Positive Cells	0		tumour: Stain 2 Positive Cells	0		tumour: Stain 2 Positive Cells	0
		tumour: Stain 2 0+ Cells	7924		tumour: Stain 2 0+ Cells	2879		tumour: Stain 2 0+ Cells	3525		tumour: Stain 2 0+ Cells	6428		tumour: Stain 2 0+ Cells	4168		tumour: Stain 2 0+ Cells	5585		tumour: Stain 2 0+ Cells	5799		tumour: Stain 2 0+ Cells	8745
		tumour: Stain 2 1+ Cells	0		tumour: Stain 2 1+ Cells	0		tumour: Stain 2 1+ Cells	0		tumour: Stain 2 1+ Cells	0		tumour: Stain 2 1+ Cells	0		tumour: Stain 2 1+ Cells	0		tumour: Stain 2 1+ Cells	0		tumour: Stain 2 1+ Cells	0
		tumour: Stain 2 2+ Cells	0		tumour: Stain 2 2+ Cells	0		tumour: Stain 2 2+ Cells	0		tumour: Stain 2 2+ Cells	0		tumour: Stain 2 2+ Cells	0		tumour: Stain 2 2+ Cells	0		tumour: Stain 2 2+ Cells	0		tumour: Stain 2 2+ Cells	0
		tumour: Stain 2 3+ Cells	0		tumour: Stain 2 3+ Cells	0		tumour: Stain 2 3+ Cells	0		tumour: Stain 2 3+ Cells	0		tumour: Stain 2 3+ Cells	0		tumour: Stain 2 3+ Cells	0		tumour: Stain 2 3+ Cells	0		tumour: Stain 2 3+ Cells	0
		tumour: Dual Positive Cells	0		tumour: Dual Positive Cells	0		tumour: Dual Positive Cells	0		tumour: Dual Positive Cells	0		tumour: Dual Positive Cells	0		tumour: Dual Positive Cells	0		tumour: Dual Positive Cells	0		tumour: Dual Positive Cells	0
		tumour: Dual Negative Cells	4640		tumour: Dual Negative Cells	1247		tumour: Dual Negative Cells	2821		tumour: Dual Negative Cells	4466		tumour: Dual Negative Cells	2159		tumour: Dual Negative Cells	3878		tumour: Dual Negative Cells	4432		tumour: Dual Negative Cells	6473
		tumour: % Stain 1 Positive Cells	41.4437		tumour: % Stain 1 Positive Cells	56.6863		tumour: % Stain 1 Positive Cells	19.9716		tumour: % Stain 1 Positive Cells	30.5227		tumour: % Stain 1 Positive Cells	48.2006		tumour: % Stain 1 Positive Cells	30.564		tumour: % Stain 1 Positive Cells	23.573		tumour: % Stain 1 Positive Cells	25.9806
		tumour: % Stain 1 0+ Cells	58.5563		tumour: % Stain 1 0+ Cells	43.3137		tumour: % Stain 1 0+ Cells	80.0284		tumour: % Stain 1 0+ Cells	69.4773		tumour: % Stain 1 0+ Cells	51.7994		tumour: % Stain 1 0+ Cells	69.436		tumour: % Stain 1 0+ Cells	76.427		tumour: % Stain 1 0+ Cells	74.0194
		tumour: % Stain 1 1+ Cells	13.0363		tumour: % Stain 1 1+ Cells	16.603		tumour: % Stain 1 1+ Cells	6.92199		tumour: % Stain 1 1+ Cells	8.78967		tumour: % Stain 1 1+ Cells	11.1084		tumour: % Stain 1 1+ Cells	7.94987		tumour: % Stain 1 1+ Cells	7.43232		tumour: % Stain 1 1+ Cells	8.58776
		tumour: % Stain 1 2+ Cells	13.6042		tumour: % Stain 1 2+ Cells	20.4585		tumour: % Stain 1 2+ Cells	6.29787		tumour: % Stain 1 2+ Cells	11.1854		tumour: % Stain 1 2+ Cells	15.691		tumour: % Stain 1 2+ Cells	9.61504		tumour: % Stain 1 2+ Cells	8.19107		tumour: % Stain 1 2+ Cells	7.85592
		tumour: % Stain 1 3+ Cells	14.8031		tumour: % Stain 1 3+ Cells	19.6249		tumour: % Stain 1 3+ Cells	6.75177		tumour: % Stain 1 3+ Cells	10.5476		tumour: % Stain 1 3+ Cells	21.4012		tumour: % Stain 1 3+ Cells	12.9991		tumour: % Stain 1 3+ Cells	7.94965		tumour: % Stain 1 3+ Cells	9.53688
		tumour: Stain 1 H-Score	84.6542		tumour: Stain 1 H-Score	116.395		tumour: Stain 1 H-Score	39.773		tumour: Stain 1 H-Score	62.8034		tumour: Stain 1 H-Score	106.694		tumour: Stain 1 H-Score	66.1773		tumour: Stain 1 H-Score	47.6634		tumour: Stain 1 H-Score	52.9102
		tumour: % Stain 2 Positive Cells	0		tumour: % Stain 2 Positive Cells	0		tumour: % Stain 2 Positive Cells	0		tumour: % Stain 2 Positive Cells	0		tumour: % Stain 2 Positive Cells	0		tumour: % Stain 2 Positive Cells	0		tumour: % Stain 2 Positive Cells	0		tumour: % Stain 2 Positive Cells	0
		tumour: % Stain 2 0+ Cells	100		tumour: % Stain 2 0+ Cells	100		tumour: % Stain 2 0+ Cells	100		tumour: % Stain 2 0+ Cells	100		tumour: % Stain 2 0+ Cells	100		tumour: % Stain 2 0+ Cells	100		tumour: % Stain 2 0+ Cells	100		tumour: % Stain 2 0+ Cells	100
		tumour: % Stain 2 1+ Cells	0		tumour: % Stain 2 1+ Cells	0		tumour: % Stain 2 1+ Cells	0		tumour: % Stain 2 1+ Cells	0		tumour: % Stain 2 1+ Cells	0		tumour: % Stain 2 1+ Cells	0		tumour: % Stain 2 1+ Cells	0		tumour: % Stain 2 1+ Cells	0
		tumour: % Stain 2 2+ Cells	0		tumour: % Stain 2 2+ Cells	0		tumour: % Stain 2 2+ Cells	0		tumour: % Stain 2 2+ Cells	0		tumour: % Stain 2 2+ Cells	0		tumour: % Stain 2 2+ Cells	0		tumour: % Stain 2 2+ Cells	0		tumour: % Stain 2 2+ Cells	0
		tumour: % Stain 2 3+ Cells	0		tumour: % Stain 2 3+ Cells	0		tumour: % Stain 2 3+ Cells	0		tumour: % Stain 2 3+ Cells	0		tumour: % Stain 2 3+ Cells	0		tumour: % Stain 2 3+ Cells	0		tumour: % Stain 2 3+ Cells	0		tumour: % Stain 2 3+ Cells	0
		tumour: Stain 2 H-Score	0		tumour: Stain 2 H-Score	0		tumour: Stain 2 H-Score	0		tumour: Stain 2 H-Score	0		tumour: Stain 2 H-Score	0		tumour: Stain 2 H-Score	0		tumour: Stain 2 H-Score	0		tumour: Stain 2 H-Score	0
		tumour: % Dual Positive Cells	0		tumour: % Dual Positive Cells	0		tumour: % Dual Positive Cells	0		tumour: % Dual Positive Cells	0		tumour: % Dual Positive Cells	0		tumour: % Dual Positive Cells	0		tumour: % Dual Positive Cells	0		tumour: % Dual Positive Cells	0
		tumour: % Dual Negative Cells	58.5563		tumour: % Dual Negative Cells	43.3137		tumour: % Dual Negative Cells	80.0284		tumour: % Dual Negative Cells	69.4773		tumour: % Dual Negative Cells	51.7994		tumour: % Dual Negative Cells	69.436		tumour: % Dual Negative Cells	76.427		tumour: % Dual Negative Cells	74.0194
		tumour: Avg Stain 1 Nuclear OD	0.212856		tumour: Avg Stain 1 Nuclear OD	0.278639		tumour: Avg Stain 1 Nuclear OD	0.115616		tumour: Avg Stain 1 Nuclear OD	0.162366		tumour: Avg Stain 1 Nuclear OD	0.264531		tumour: Avg Stain 1 Nuclear OD	0.175881		tumour: Avg Stain 1 Nuclear OD	0.130078		tumour: Avg Stain 1 Nuclear OD	0.146187
		tumour: Avg Stain 2 Nuclear OD	0.0480225		tumour: Avg Stain 2 Nuclear OD	0.0516267		tumour: Avg Stain 2 Nuclear OD	0.0416375		tumour: Avg Stain 2 Nuclear OD	0.0447159		tumour: Avg Stain 2 Nuclear OD	0.0518988		tumour: Avg Stain 2 Nuclear OD	0.0455678		tumour: Avg Stain 2 Nuclear OD	0.0425009		tumour: Avg Stain 2 Nuclear OD	0.0432371
		tumour: Avg Stain 1 Cytoplasmic OD	0.0618148		tumour: Avg Stain 1 Cytoplasmic OD	0.0781547		tumour: Avg Stain 1 Cytoplasmic OD	0.0446005		tumour: Avg Stain 1 Cytoplasmic OD	0.0521637		tumour: Avg Stain 1 Cytoplasmic OD	0.073586		tumour: Avg Stain 1 Cytoplasmic OD	0.0541316		tumour: Avg Stain 1 Cytoplasmic OD	0.0481378		tumour: Avg Stain 1 Cytoplasmic OD	0.0523499
		tumour: Avg Stain 2 Cytoplasmic OD	0.0321253		tumour: Avg Stain 2 Cytoplasmic OD	0.0324242		tumour: Avg Stain 2 Cytoplasmic OD	0.0319801		tumour: Avg Stain 2 Cytoplasmic OD	0.032433		tumour: Avg Stain 2 Cytoplasmic OD	0.0322381		tumour: Avg Stain 2 Cytoplasmic OD	0.0321146		tumour: Avg Stain 2 Cytoplasmic OD	0.0324843		tumour: Avg Stain 2 Cytoplasmic OD	0.0320115
		tumour: Avg Cell Area (µm²)	110.413		tumour: Avg Cell Area (µm²)	113.771		tumour: Avg Cell Area (µm²)	107.17		tumour: Avg Cell Area (µm²)	99.7522		tumour: Avg Cell Area (µm²)	107.565		tumour: Avg Cell Area (µm²)	102.372		tumour: Avg Cell Area (µm²)	102.869		tumour: Avg Cell Area (µm²)	107.784
		tumour: Avg Cytoplasm Area (µm²)	84.1804		tumour: Avg Cytoplasm Area (µm²)	83.1155		tumour: Avg Cytoplasm Area (µm²)	83.1879		tumour: Avg Cytoplasm Area (µm²)	76.1526		tumour: Avg Cytoplasm Area (µm²)	78.8346		tumour: Avg Cytoplasm Area (µm²)	78.9096		tumour: Avg Cytoplasm Area (µm²)	78.2303		tumour: Avg Cytoplasm Area (µm²)	80.2823
		tumour: Avg Nucleus Area (µm²)	26.2324		tumour: Avg Nucleus Area (µm²)	30.655		tumour: Avg Nucleus Area (µm²)	23.982		tumour: Avg Nucleus Area (µm²)	23.5995		tumour: Avg Nucleus Area (µm²)	28.7306		tumour: Avg Nucleus Area (µm²)	23.4628		tumour: Avg Nucleus Area (µm²)	24.6388		tumour: Avg Nucleus Area (µm²)	27.5019
		tumour: Avg Nucleus Perimeter (µm)	10.2501		tumour: Avg Nucleus Perimeter (µm)	11.8709		tumour: Avg Nucleus Perimeter (µm)	9.4457		tumour: Avg Nucleus Perimeter (µm)	9.31583		tumour: Avg Nucleus Perimeter (µm)	11.1715		tumour: Avg Nucleus Perimeter (µm)	9.26385		tumour: Avg Nucleus Perimeter (µm)	9.70827		tumour: Avg Nucleus Perimeter (µm)	10.7373
		tumour: Avg Nucleus Roundness	0.701658		tumour: Avg Nucleus Roundness	0.69803		tumour: Avg Nucleus Roundness	0.699551		tumour: Avg Nucleus Roundness	0.692829		tumour: Avg Nucleus Roundness	0.693871		tumour: Avg Nucleus Roundness	0.695433		tumour: Avg Nucleus Roundness	0.690229		tumour: Avg Nucleus Roundness	0.70194
		tumour: Tissue Area (µm²)	2102020		tumour: Tissue Area (µm²)	736560		tumour: Tissue Area (µm²)	921294		tumour: Tissue Area (µm²)	1424670		tumour: Tissue Area (µm²)	956039		tumour: Tissue Area (µm²)	1317420		tumour: Tissue Area (µm²)	1333270		tumour: Tissue Area (µm²)	2149000
		BSNA43.2d	WT
		Name	Value		Name	Value		Name	Value		Name	Value		Name	Value		Name	Value		Name	Value		Name	Value
		Classified Area (mm²)	1.19448		Classified Area (mm²)	1.38192		Classified Area (mm²)	0.96068		Classified Area (mm²)	1.59212		Classified Area (mm²)	0.75501		Classified Area (mm²)	0.70448		Classified Area (mm²)	0.71823		Classified Area (mm²)	1.40817
		tumour Area (mm²)	1.1944		tumour Area (mm²)	1.3725		tumour Area (mm²)	0.95372		tumour Area (mm²)	1.58485		tumour Area (mm²)	0.73734		tumour Area (mm²)	0.69285		tumour Area (mm²)	0.69173		tumour Area (mm²)	1.40693
		empty Area (mm²)	8e-05		empty Area (mm²)	0		empty Area (mm²)	0		empty Area (mm²)	0.0001		empty Area (mm²)	0		empty Area (mm²)	0		empty Area (mm²)	0		empty Area (mm²)	0.00014
		necrosis Area (mm²)	0		necrosis Area (mm²)	0.00489		necrosis Area (mm²)	0		necrosis Area (mm²)	0		necrosis Area (mm²)	0		necrosis Area (mm²)	0		necrosis Area (mm²)	0.00101		necrosis Area (mm²)	0
		normal Area (mm²)	0		normal Area (mm²)	0.00453		normal Area (mm²)	0.00696		normal Area (mm²)	0.00717		normal Area (mm²)	0.01767		normal Area (mm²)	0.01163		normal Area (mm²)	0.0255		normal Area (mm²)	0.0011
		Total Cells	5530		Total Cells	6171		Total Cells	4355		Total Cells	6853		Total Cells	3870		Total Cells	3454		Total Cells	3040		Total Cells	6167
		Stain 1 Positive Cells	3282		Stain 1 Positive Cells	2359		Stain 1 Positive Cells	2463		Stain 1 Positive Cells	3842		Stain 1 Positive Cells	1346		Stain 1 Positive Cells	1196		Stain 1 Positive Cells	721		Stain 1 Positive Cells	4123
		Stain 1 0+ Cells	2248		Stain 1 0+ Cells	3812		Stain 1 0+ Cells	1892		Stain 1 0+ Cells	3011		Stain 1 0+ Cells	2524		Stain 1 0+ Cells	2258		Stain 1 0+ Cells	2319		Stain 1 0+ Cells	2044
		Stain 1 1+ Cells	684		Stain 1 1+ Cells	640		Stain 1 1+ Cells	650		Stain 1 1+ Cells	809		Stain 1 1+ Cells	431		Stain 1 1+ Cells	345		Stain 1 1+ Cells	194		Stain 1 1+ Cells	735
		Stain 1 2+ Cells	1015		Stain 1 2+ Cells	766		Stain 1 2+ Cells	870		Stain 1 2+ Cells	1235		Stain 1 2+ Cells	468		Stain 1 2+ Cells	391		Stain 1 2+ Cells	260		Stain 1 2+ Cells	1473
		Stain 1 3+ Cells	1583		Stain 1 3+ Cells	953		Stain 1 3+ Cells	943		Stain 1 3+ Cells	1798		Stain 1 3+ Cells	447		Stain 1 3+ Cells	460		Stain 1 3+ Cells	267		Stain 1 3+ Cells	1915
		Stain 2 Positive Cells	0		Stain 2 Positive Cells	0		Stain 2 Positive Cells	0		Stain 2 Positive Cells	0		Stain 2 Positive Cells	0		Stain 2 Positive Cells	0		Stain 2 Positive Cells	0		Stain 2 Positive Cells	0
		Stain 2 0+ Cells	5530		Stain 2 0+ Cells	6171		Stain 2 0+ Cells	4355		Stain 2 0+ Cells	6853		Stain 2 0+ Cells	3870		Stain 2 0+ Cells	3454		Stain 2 0+ Cells	3040		Stain 2 0+ Cells	6167
		Stain 2 1+ Cells	0		Stain 2 1+ Cells	0		Stain 2 1+ Cells	0		Stain 2 1+ Cells	0		Stain 2 1+ Cells	0		Stain 2 1+ Cells	0		Stain 2 1+ Cells	0		Stain 2 1+ Cells	0
		Stain 2 2+ Cells	0		Stain 2 2+ Cells	0		Stain 2 2+ Cells	0		Stain 2 2+ Cells	0		Stain 2 2+ Cells	0		Stain 2 2+ Cells	0		Stain 2 2+ Cells	0		Stain 2 2+ Cells	0
		Stain 2 3+ Cells	0		Stain 2 3+ Cells	0		Stain 2 3+ Cells	0		Stain 2 3+ Cells	0		Stain 2 3+ Cells	0		Stain 2 3+ Cells	0		Stain 2 3+ Cells	0		Stain 2 3+ Cells	0
		Dual Positive Cells	0		Dual Positive Cells	0		Dual Positive Cells	0		Dual Positive Cells	0		Dual Positive Cells	0		Dual Positive Cells	0		Dual Positive Cells	0		Dual Positive Cells	0
		Dual Negative Cells	2248		Dual Negative Cells	3812		Dual Negative Cells	1892		Dual Negative Cells	3011		Dual Negative Cells	2524		Dual Negative Cells	2258		Dual Negative Cells	2319		Dual Negative Cells	2044
		% Stain 1 Positive Cells	59.349		% Stain 1 Positive Cells	38.2272		% Stain 1 Positive Cells	56.5557		% Stain 1 Positive Cells	56.063		% Stain 1 Positive Cells	34.7804		% Stain 1 Positive Cells	34.6265		% Stain 1 Positive Cells	23.7171		% Stain 1 Positive Cells	66.8558		46.2718
		% Stain 1 0+ Cells	40.651		% Stain 1 0+ Cells	61.7728		% Stain 1 0+ Cells	43.4443		% Stain 1 0+ Cells	43.937		% Stain 1 0+ Cells	65.2196		% Stain 1 0+ Cells	65.3735		% Stain 1 0+ Cells	76.2829		% Stain 1 0+ Cells	33.1442
		% Stain 1 1+ Cells	12.3689		% Stain 1 1+ Cells	10.3711		% Stain 1 1+ Cells	14.9254		% Stain 1 1+ Cells	11.805		% Stain 1 1+ Cells	11.137		% Stain 1 1+ Cells	9.98842		% Stain 1 1+ Cells	6.38158		% Stain 1 1+ Cells	11.9183
		% Stain 1 2+ Cells	18.3544		% Stain 1 2+ Cells	12.4129		% Stain 1 2+ Cells	19.977		% Stain 1 2+ Cells	18.0213		% Stain 1 2+ Cells	12.093		% Stain 1 2+ Cells	11.3202		% Stain 1 2+ Cells	8.55263		% Stain 1 2+ Cells	23.8852
		% Stain 1 3+ Cells	28.6257		% Stain 1 3+ Cells	15.4432		% Stain 1 3+ Cells	21.6533		% Stain 1 3+ Cells	26.2367		% Stain 1 3+ Cells	11.5504		% Stain 1 3+ Cells	13.3179		% Stain 1 3+ Cells	8.78289		% Stain 1 3+ Cells	31.0524
		Stain 1 H-Score	134.955		Stain 1 H-Score	81.5265		Stain 1 H-Score	119.839		Stain 1 H-Score	126.558		Stain 1 H-Score	69.9742		Stain 1 H-Score	72.5825		Stain 1 H-Score	49.8355		Stain 1 H-Score	152.846
		% Stain 2 Positive Cells	0		% Stain 2 Positive Cells	0		% Stain 2 Positive Cells	0		% Stain 2 Positive Cells	0		% Stain 2 Positive Cells	0		% Stain 2 Positive Cells	0		% Stain 2 Positive Cells	0		% Stain 2 Positive Cells	0
		% Stain 2 0+ Cells	100		% Stain 2 0+ Cells	100		% Stain 2 0+ Cells	100		% Stain 2 0+ Cells	100		% Stain 2 0+ Cells	100		% Stain 2 0+ Cells	100		% Stain 2 0+ Cells	100		% Stain 2 0+ Cells	100
		% Stain 2 1+ Cells	0		% Stain 2 1+ Cells	0		% Stain 2 1+ Cells	0		% Stain 2 1+ Cells	0		% Stain 2 1+ Cells	0		% Stain 2 1+ Cells	0		% Stain 2 1+ Cells	0		% Stain 2 1+ Cells	0
		% Stain 2 2+ Cells	0		% Stain 2 2+ Cells	0		% Stain 2 2+ Cells	0		% Stain 2 2+ Cells	0		% Stain 2 2+ Cells	0		% Stain 2 2+ Cells	0		% Stain 2 2+ Cells	0		% Stain 2 2+ Cells	0
		% Stain 2 3+ Cells	0		% Stain 2 3+ Cells	0		% Stain 2 3+ Cells	0		% Stain 2 3+ Cells	0		% Stain 2 3+ Cells	0		% Stain 2 3+ Cells	0		% Stain 2 3+ Cells	0		% Stain 2 3+ Cells	0
		Stain 2 H-Score	0		Stain 2 H-Score	0		Stain 2 H-Score	0		Stain 2 H-Score	0		Stain 2 H-Score	0		Stain 2 H-Score	0		Stain 2 H-Score	0		Stain 2 H-Score	0
		% Dual Positive Cells	0		% Dual Positive Cells	0		% Dual Positive Cells	0		% Dual Positive Cells	0		% Dual Positive Cells	0		% Dual Positive Cells	0		% Dual Positive Cells	0		% Dual Positive Cells	0
		% Dual Negative Cells	40.651		% Dual Negative Cells	61.7728		% Dual Negative Cells	43.4443		% Dual Negative Cells	43.937		% Dual Negative Cells	65.2196		% Dual Negative Cells	65.3735		% Dual Negative Cells	76.2829		% Dual Negative Cells	33.1442
		Avg Stain 1 Nuclear OD	0.326736		Avg Stain 1 Nuclear OD	0.209213		Avg Stain 1 Nuclear OD	0.285661		Avg Stain 1 Nuclear OD	0.30879		Avg Stain 1 Nuclear OD	0.18206		Avg Stain 1 Nuclear OD	0.188376		Avg Stain 1 Nuclear OD	0.135852		Avg Stain 1 Nuclear OD	0.357433
		Avg Stain 2 Nuclear OD	0.0570021		Avg Stain 2 Nuclear OD	0.0486791		Avg Stain 2 Nuclear OD	0.051742		Avg Stain 2 Nuclear OD	0.0574286		Avg Stain 2 Nuclear OD	0.0440924		Avg Stain 2 Nuclear OD	0.0461901		Avg Stain 2 Nuclear OD	0.0430327		Avg Stain 2 Nuclear OD	0.0585917
		Avg Stain 1 Cytoplasmic OD	0.0765703		Avg Stain 1 Cytoplasmic OD	0.0582421		Avg Stain 1 Cytoplasmic OD	0.075308		Avg Stain 1 Cytoplasmic OD	0.0767966		Avg Stain 1 Cytoplasmic OD	0.0565342		Avg Stain 1 Cytoplasmic OD	0.0558413		Avg Stain 1 Cytoplasmic OD	0.0469175		Avg Stain 1 Cytoplasmic OD	0.0868055
		Avg Stain 2 Cytoplasmic OD	0.0322651		Avg Stain 2 Cytoplasmic OD	0.0320882		Avg Stain 2 Cytoplasmic OD	0.0320284		Avg Stain 2 Cytoplasmic OD	0.0322987		Avg Stain 2 Cytoplasmic OD	0.0320495		Avg Stain 2 Cytoplasmic OD	0.0321413		Avg Stain 2 Cytoplasmic OD	0.0322212		Avg Stain 2 Cytoplasmic OD	0.0322149
		Avg Cell Area (µm²)	105.335		Avg Cell Area (µm²)	97.1815		Avg Cell Area (µm²)	104.329		Avg Cell Area (µm²)	104.651		Avg Cell Area (µm²)	92.2976		Avg Cell Area (µm²)	93.4628		Avg Cell Area (µm²)	97.4272		Avg Cell Area (µm²)	108.53
		Avg Cytoplasm Area (µm²)	75.4463		Avg Cytoplasm Area (µm²)	73.3648		Avg Cytoplasm Area (µm²)	77.3319		Avg Cytoplasm Area (µm²)	76.7694		Avg Cytoplasm Area (µm²)	69.6772		Avg Cytoplasm Area (µm²)	71.1304		Avg Cytoplasm Area (µm²)	73.1895		Avg Cytoplasm Area (µm²)	78.4197
		Avg Nucleus Area (µm²)	29.8887		Avg Nucleus Area (µm²)	23.8167		Avg Nucleus Area (µm²)	26.9973		Avg Nucleus Area (µm²)	27.8816		Avg Nucleus Area (µm²)	22.6204		Avg Nucleus Area (µm²)	22.3324		Avg Nucleus Area (µm²)	24.2377		Avg Nucleus Area (µm²)	30.1102
		Avg Nucleus Perimeter (µm)	11.66		Avg Nucleus Perimeter (µm)	9.4124		Avg Nucleus Perimeter (µm)	10.5815		Avg Nucleus Perimeter (µm)	10.8923		Avg Nucleus Perimeter (µm)	8.93572		Avg Nucleus Perimeter (µm)	8.81998		Avg Nucleus Perimeter (µm)	9.58347		Avg Nucleus Perimeter (µm)	11.8214
		Avg Nucleus Roundness	0.689765		Avg Nucleus Roundness	0.705366		Avg Nucleus Roundness	0.704027		Avg Nucleus Roundness	0.705234		Avg Nucleus Roundness	0.701869		Avg Nucleus Roundness	0.704022		Avg Nucleus Roundness	0.70995		Avg Nucleus Roundness	0.701591
		Tissue Area (µm²)	1183960		Tissue Area (µm²)	1276250		Tissue Area (µm²)	950928		Tissue Area (µm²)	1560090		Tissue Area (µm²)	739001		Tissue Area (µm²)	686224		Tissue Area (µm²)	608550		Tissue Area (µm²)	1398030
		tumour: Total Cells	5530		tumour: Total Cells	6171		tumour: Total Cells	4355		tumour: Total Cells	6853		tumour: Total Cells	3870		tumour: Total Cells	3454		tumour: Total Cells	3040		tumour: Total Cells	6167
		tumour: Stain 1 Positive Cells	3282		tumour: Stain 1 Positive Cells	2359		tumour: Stain 1 Positive Cells	2463		tumour: Stain 1 Positive Cells	3842		tumour: Stain 1 Positive Cells	1346		tumour: Stain 1 Positive Cells	1196		tumour: Stain 1 Positive Cells	721		tumour: Stain 1 Positive Cells	4123
		tumour: Stain 1 0+ Cells	2248		tumour: Stain 1 0+ Cells	3812		tumour: Stain 1 0+ Cells	1892		tumour: Stain 1 0+ Cells	3011		tumour: Stain 1 0+ Cells	2524		tumour: Stain 1 0+ Cells	2258		tumour: Stain 1 0+ Cells	2319		tumour: Stain 1 0+ Cells	2044
		tumour: Stain 1 1+ Cells	684		tumour: Stain 1 1+ Cells	640		tumour: Stain 1 1+ Cells	650		tumour: Stain 1 1+ Cells	809		tumour: Stain 1 1+ Cells	431		tumour: Stain 1 1+ Cells	345		tumour: Stain 1 1+ Cells	194		tumour: Stain 1 1+ Cells	735
		tumour: Stain 1 2+ Cells	1015		tumour: Stain 1 2+ Cells	766		tumour: Stain 1 2+ Cells	870		tumour: Stain 1 2+ Cells	1235		tumour: Stain 1 2+ Cells	468		tumour: Stain 1 2+ Cells	391		tumour: Stain 1 2+ Cells	260		tumour: Stain 1 2+ Cells	1473
		tumour: Stain 1 3+ Cells	1583		tumour: Stain 1 3+ Cells	953		tumour: Stain 1 3+ Cells	943		tumour: Stain 1 3+ Cells	1798		tumour: Stain 1 3+ Cells	447		tumour: Stain 1 3+ Cells	460		tumour: Stain 1 3+ Cells	267		tumour: Stain 1 3+ Cells	1915
		tumour: Stain 2 Positive Cells	0		tumour: Stain 2 Positive Cells	0		tumour: Stain 2 Positive Cells	0		tumour: Stain 2 Positive Cells	0		tumour: Stain 2 Positive Cells	0		tumour: Stain 2 Positive Cells	0		tumour: Stain 2 Positive Cells	0		tumour: Stain 2 Positive Cells	0
		tumour: Stain 2 0+ Cells	5530		tumour: Stain 2 0+ Cells	6171		tumour: Stain 2 0+ Cells	4355		tumour: Stain 2 0+ Cells	6853		tumour: Stain 2 0+ Cells	3870		tumour: Stain 2 0+ Cells	3454		tumour: Stain 2 0+ Cells	3040		tumour: Stain 2 0+ Cells	6167
		tumour: Stain 2 1+ Cells	0		tumour: Stain 2 1+ Cells	0		tumour: Stain 2 1+ Cells	0		tumour: Stain 2 1+ Cells	0		tumour: Stain 2 1+ Cells	0		tumour: Stain 2 1+ Cells	0		tumour: Stain 2 1+ Cells	0		tumour: Stain 2 1+ Cells	0
		tumour: Stain 2 2+ Cells	0		tumour: Stain 2 2+ Cells	0		tumour: Stain 2 2+ Cells	0		tumour: Stain 2 2+ Cells	0		tumour: Stain 2 2+ Cells	0		tumour: Stain 2 2+ Cells	0		tumour: Stain 2 2+ Cells	0		tumour: Stain 2 2+ Cells	0
		tumour: Stain 2 3+ Cells	0		tumour: Stain 2 3+ Cells	0		tumour: Stain 2 3+ Cells	0		tumour: Stain 2 3+ Cells	0		tumour: Stain 2 3+ Cells	0		tumour: Stain 2 3+ Cells	0		tumour: Stain 2 3+ Cells	0		tumour: Stain 2 3+ Cells	0
		tumour: Dual Positive Cells	0		tumour: Dual Positive Cells	0		tumour: Dual Positive Cells	0		tumour: Dual Positive Cells	0		tumour: Dual Positive Cells	0		tumour: Dual Positive Cells	0		tumour: Dual Positive Cells	0		tumour: Dual Positive Cells	0
		tumour: Dual Negative Cells	2248		tumour: Dual Negative Cells	3812		tumour: Dual Negative Cells	1892		tumour: Dual Negative Cells	3011		tumour: Dual Negative Cells	2524		tumour: Dual Negative Cells	2258		tumour: Dual Negative Cells	2319		tumour: Dual Negative Cells	2044
		tumour: % Stain 1 Positive Cells	59.349		tumour: % Stain 1 Positive Cells	38.2272		tumour: % Stain 1 Positive Cells	56.5557		tumour: % Stain 1 Positive Cells	56.063		tumour: % Stain 1 Positive Cells	34.7804		tumour: % Stain 1 Positive Cells	34.6265		tumour: % Stain 1 Positive Cells	23.7171		tumour: % Stain 1 Positive Cells	66.8558
		tumour: % Stain 1 0+ Cells	40.651		tumour: % Stain 1 0+ Cells	61.7728		tumour: % Stain 1 0+ Cells	43.4443		tumour: % Stain 1 0+ Cells	43.937		tumour: % Stain 1 0+ Cells	65.2196		tumour: % Stain 1 0+ Cells	65.3735		tumour: % Stain 1 0+ Cells	76.2829		tumour: % Stain 1 0+ Cells	33.1442
		tumour: % Stain 1 1+ Cells	12.3689		tumour: % Stain 1 1+ Cells	10.3711		tumour: % Stain 1 1+ Cells	14.9254		tumour: % Stain 1 1+ Cells	11.805		tumour: % Stain 1 1+ Cells	11.137		tumour: % Stain 1 1+ Cells	9.98842		tumour: % Stain 1 1+ Cells	6.38158		tumour: % Stain 1 1+ Cells	11.9183
		tumour: % Stain 1 2+ Cells	18.3544		tumour: % Stain 1 2+ Cells	12.4129		tumour: % Stain 1 2+ Cells	19.977		tumour: % Stain 1 2+ Cells	18.0213		tumour: % Stain 1 2+ Cells	12.093		tumour: % Stain 1 2+ Cells	11.3202		tumour: % Stain 1 2+ Cells	8.55263		tumour: % Stain 1 2+ Cells	23.8852
		tumour: % Stain 1 3+ Cells	28.6257		tumour: % Stain 1 3+ Cells	15.4432		tumour: % Stain 1 3+ Cells	21.6533		tumour: % Stain 1 3+ Cells	26.2367		tumour: % Stain 1 3+ Cells	11.5504		tumour: % Stain 1 3+ Cells	13.3179		tumour: % Stain 1 3+ Cells	8.78289		tumour: % Stain 1 3+ Cells	31.0524
		tumour: Stain 1 H-Score	134.955		tumour: Stain 1 H-Score	81.5265		tumour: Stain 1 H-Score	119.839		tumour: Stain 1 H-Score	126.558		tumour: Stain 1 H-Score	69.9742		tumour: Stain 1 H-Score	72.5825		tumour: Stain 1 H-Score	49.8355		tumour: Stain 1 H-Score	152.846
		tumour: % Stain 2 Positive Cells	0		tumour: % Stain 2 Positive Cells	0		tumour: % Stain 2 Positive Cells	0		tumour: % Stain 2 Positive Cells	0		tumour: % Stain 2 Positive Cells	0		tumour: % Stain 2 Positive Cells	0		tumour: % Stain 2 Positive Cells	0		tumour: % Stain 2 Positive Cells	0
		tumour: % Stain 2 0+ Cells	100		tumour: % Stain 2 0+ Cells	100		tumour: % Stain 2 0+ Cells	100		tumour: % Stain 2 0+ Cells	100		tumour: % Stain 2 0+ Cells	100		tumour: % Stain 2 0+ Cells	100		tumour: % Stain 2 0+ Cells	100		tumour: % Stain 2 0+ Cells	100
		tumour: % Stain 2 1+ Cells	0		tumour: % Stain 2 1+ Cells	0		tumour: % Stain 2 1+ Cells	0		tumour: % Stain 2 1+ Cells	0		tumour: % Stain 2 1+ Cells	0		tumour: % Stain 2 1+ Cells	0		tumour: % Stain 2 1+ Cells	0		tumour: % Stain 2 1+ Cells	0
		tumour: % Stain 2 2+ Cells	0		tumour: % Stain 2 2+ Cells	0		tumour: % Stain 2 2+ Cells	0		tumour: % Stain 2 2+ Cells	0		tumour: % Stain 2 2+ Cells	0		tumour: % Stain 2 2+ Cells	0		tumour: % Stain 2 2+ Cells	0		tumour: % Stain 2 2+ Cells	0
		tumour: % Stain 2 3+ Cells	0		tumour: % Stain 2 3+ Cells	0		tumour: % Stain 2 3+ Cells	0		tumour: % Stain 2 3+ Cells	0		tumour: % Stain 2 3+ Cells	0		tumour: % Stain 2 3+ Cells	0		tumour: % Stain 2 3+ Cells	0		tumour: % Stain 2 3+ Cells	0
		tumour: Stain 2 H-Score	0		tumour: Stain 2 H-Score	0		tumour: Stain 2 H-Score	0		tumour: Stain 2 H-Score	0		tumour: Stain 2 H-Score	0		tumour: Stain 2 H-Score	0		tumour: Stain 2 H-Score	0		tumour: Stain 2 H-Score	0
		tumour: % Dual Positive Cells	0		tumour: % Dual Positive Cells	0		tumour: % Dual Positive Cells	0		tumour: % Dual Positive Cells	0		tumour: % Dual Positive Cells	0		tumour: % Dual Positive Cells	0		tumour: % Dual Positive Cells	0		tumour: % Dual Positive Cells	0
		tumour: % Dual Negative Cells	40.651		tumour: % Dual Negative Cells	61.7728		tumour: % Dual Negative Cells	43.4443		tumour: % Dual Negative Cells	43.937		tumour: % Dual Negative Cells	65.2196		tumour: % Dual Negative Cells	65.3735		tumour: % Dual Negative Cells	76.2829		tumour: % Dual Negative Cells	33.1442
		tumour: Avg Stain 1 Nuclear OD	0.326736		tumour: Avg Stain 1 Nuclear OD	0.209213		tumour: Avg Stain 1 Nuclear OD	0.285661		tumour: Avg Stain 1 Nuclear OD	0.30879		tumour: Avg Stain 1 Nuclear OD	0.18206		tumour: Avg Stain 1 Nuclear OD	0.188376		tumour: Avg Stain 1 Nuclear OD	0.135852		tumour: Avg Stain 1 Nuclear OD	0.357433
		tumour: Avg Stain 2 Nuclear OD	0.0570021		tumour: Avg Stain 2 Nuclear OD	0.0486791		tumour: Avg Stain 2 Nuclear OD	0.051742		tumour: Avg Stain 2 Nuclear OD	0.0574286		tumour: Avg Stain 2 Nuclear OD	0.0440924		tumour: Avg Stain 2 Nuclear OD	0.0461901		tumour: Avg Stain 2 Nuclear OD	0.0430327		tumour: Avg Stain 2 Nuclear OD	0.0585917
		tumour: Avg Stain 1 Cytoplasmic OD	0.0765703		tumour: Avg Stain 1 Cytoplasmic OD	0.0582421		tumour: Avg Stain 1 Cytoplasmic OD	0.075308		tumour: Avg Stain 1 Cytoplasmic OD	0.0767966		tumour: Avg Stain 1 Cytoplasmic OD	0.0565342		tumour: Avg Stain 1 Cytoplasmic OD	0.0558413		tumour: Avg Stain 1 Cytoplasmic OD	0.0469175		tumour: Avg Stain 1 Cytoplasmic OD	0.0868055
		tumour: Avg Stain 2 Cytoplasmic OD	0.0322651		tumour: Avg Stain 2 Cytoplasmic OD	0.0320882		tumour: Avg Stain 2 Cytoplasmic OD	0.0320284		tumour: Avg Stain 2 Cytoplasmic OD	0.0322987		tumour: Avg Stain 2 Cytoplasmic OD	0.0320495		tumour: Avg Stain 2 Cytoplasmic OD	0.0321413		tumour: Avg Stain 2 Cytoplasmic OD	0.0322212		tumour: Avg Stain 2 Cytoplasmic OD	0.0322149
		tumour: Avg Cell Area (µm²)	105.335		tumour: Avg Cell Area (µm²)	97.1815		tumour: Avg Cell Area (µm²)	104.329		tumour: Avg Cell Area (µm²)	104.651		tumour: Avg Cell Area (µm²)	92.2976		tumour: Avg Cell Area (µm²)	93.4628		tumour: Avg Cell Area (µm²)	97.4272		tumour: Avg Cell Area (µm²)	108.53
		tumour: Avg Cytoplasm Area (µm²)	75.4463		tumour: Avg Cytoplasm Area (µm²)	73.3648		tumour: Avg Cytoplasm Area (µm²)	77.3319		tumour: Avg Cytoplasm Area (µm²)	76.7694		tumour: Avg Cytoplasm Area (µm²)	69.6772		tumour: Avg Cytoplasm Area (µm²)	71.1304		tumour: Avg Cytoplasm Area (µm²)	73.1895		tumour: Avg Cytoplasm Area (µm²)	78.4197
		tumour: Avg Nucleus Area (µm²)	29.8887		tumour: Avg Nucleus Area (µm²)	23.8167		tumour: Avg Nucleus Area (µm²)	26.9973		tumour: Avg Nucleus Area (µm²)	27.8816		tumour: Avg Nucleus Area (µm²)	22.6204		tumour: Avg Nucleus Area (µm²)	22.3324		tumour: Avg Nucleus Area (µm²)	24.2377		tumour: Avg Nucleus Area (µm²)	30.1102
		tumour: Avg Nucleus Perimeter (µm)	11.66		tumour: Avg Nucleus Perimeter (µm)	9.4124		tumour: Avg Nucleus Perimeter (µm)	10.5815		tumour: Avg Nucleus Perimeter (µm)	10.8923		tumour: Avg Nucleus Perimeter (µm)	8.93572		tumour: Avg Nucleus Perimeter (µm)	8.81998		tumour: Avg Nucleus Perimeter (µm)	9.58347		tumour: Avg Nucleus Perimeter (µm)	11.8214
		tumour: Avg Nucleus Roundness	0.689765		tumour: Avg Nucleus Roundness	0.705366		tumour: Avg Nucleus Roundness	0.704027		tumour: Avg Nucleus Roundness	0.705234		tumour: Avg Nucleus Roundness	0.701869		tumour: Avg Nucleus Roundness	0.704022		tumour: Avg Nucleus Roundness	0.70995		tumour: Avg Nucleus Roundness	0.701591
		tumour: Tissue Area (µm²)	1183960		tumour: Tissue Area (µm²)	1276250		tumour: Tissue Area (µm²)	950928		tumour: Tissue Area (µm²)	1560090		tumour: Tissue Area (µm²)	739001		tumour: Tissue Area (µm²)	686224		tumour: Tissue Area (µm²)	608550		tumour: Tissue Area (µm²)	1398030
		BSNA41.2d	WT
		Name	Value		Name	Value		Name	Value		Name	Value		Name	Value		Name	Value		Name	Value		Name	Value
		Classified Area (mm²)	0.94024		Classified Area (mm²)	0.67555		Classified Area (mm²)	0.53211		Classified Area (mm²)	1.74177		Classified Area (mm²)	2.66967		Classified Area (mm²)	1.31435		Classified Area (mm²)	1.1648		Classified Area (mm²)	0.93482
		tumour Area (mm²)	0.93886		tumour Area (mm²)	0.67062		tumour Area (mm²)	0.53178		tumour Area (mm²)	1.73372		tumour Area (mm²)	2.66967		tumour Area (mm²)	1.3105		tumour Area (mm²)	1.16226		tumour Area (mm²)	0.93482
		empty Area (mm²)	0.0003		empty Area (mm²)	0.00139		empty Area (mm²)	0		empty Area (mm²)	0.00074		empty Area (mm²)	0		empty Area (mm²)	0.00024		empty Area (mm²)	0.00249		empty Area (mm²)	0
		necrosis Area (mm²)	0		necrosis Area (mm²)	0		necrosis Area (mm²)	0		necrosis Area (mm²)	4e-05		necrosis Area (mm²)	0		necrosis Area (mm²)	0		necrosis Area (mm²)	5e-05		necrosis Area (mm²)	0
		normal Area (mm²)	0.00107		normal Area (mm²)	0.00354		normal Area (mm²)	0.00032		normal Area (mm²)	0.00727		normal Area (mm²)	0		normal Area (mm²)	0.00361		normal Area (mm²)	0		normal Area (mm²)	0
		Total Cells	2898		Total Cells	2343		Total Cells	1961		Total Cells	5792		Total Cells	10226		Total Cells	5098		Total Cells	4554		Total Cells	4001
		Stain 1 Positive Cells	2010		Stain 1 Positive Cells	1224		Stain 1 Positive Cells	1412		Stain 1 Positive Cells	2822		Stain 1 Positive Cells	5727		Stain 1 Positive Cells	2994		Stain 1 Positive Cells	3639		Stain 1 Positive Cells	3062
		Stain 1 0+ Cells	888		Stain 1 0+ Cells	1119		Stain 1 0+ Cells	549		Stain 1 0+ Cells	2970		Stain 1 0+ Cells	4499		Stain 1 0+ Cells	2104		Stain 1 0+ Cells	915		Stain 1 0+ Cells	939
		Stain 1 1+ Cells	907		Stain 1 1+ Cells	553		Stain 1 1+ Cells	443		Stain 1 1+ Cells	1007		Stain 1 1+ Cells	2042		Stain 1 1+ Cells	1060		Stain 1 1+ Cells	717		Stain 1 1+ Cells	597
		Stain 1 2+ Cells	616		Stain 1 2+ Cells	318		Stain 1 2+ Cells	467		Stain 1 2+ Cells	705		Stain 1 2+ Cells	1602		Stain 1 2+ Cells	918		Stain 1 2+ Cells	1429		Stain 1 2+ Cells	1263
		Stain 1 3+ Cells	487		Stain 1 3+ Cells	353		Stain 1 3+ Cells	502		Stain 1 3+ Cells	1110		Stain 1 3+ Cells	2083		Stain 1 3+ Cells	1016		Stain 1 3+ Cells	1493		Stain 1 3+ Cells	1202
		Stain 2 Positive Cells	0		Stain 2 Positive Cells	0		Stain 2 Positive Cells	0		Stain 2 Positive Cells	0		Stain 2 Positive Cells	0		Stain 2 Positive Cells	0		Stain 2 Positive Cells	0		Stain 2 Positive Cells	0
		Stain 2 0+ Cells	2898		Stain 2 0+ Cells	2343		Stain 2 0+ Cells	1961		Stain 2 0+ Cells	5792		Stain 2 0+ Cells	10226		Stain 2 0+ Cells	5098		Stain 2 0+ Cells	4554		Stain 2 0+ Cells	4001
		Stain 2 1+ Cells	0		Stain 2 1+ Cells	0		Stain 2 1+ Cells	0		Stain 2 1+ Cells	0		Stain 2 1+ Cells	0		Stain 2 1+ Cells	0		Stain 2 1+ Cells	0		Stain 2 1+ Cells	0
		Stain 2 2+ Cells	0		Stain 2 2+ Cells	0		Stain 2 2+ Cells	0		Stain 2 2+ Cells	0		Stain 2 2+ Cells	0		Stain 2 2+ Cells	0		Stain 2 2+ Cells	0		Stain 2 2+ Cells	0
		Stain 2 3+ Cells	0		Stain 2 3+ Cells	0		Stain 2 3+ Cells	0		Stain 2 3+ Cells	0		Stain 2 3+ Cells	0		Stain 2 3+ Cells	0		Stain 2 3+ Cells	0		Stain 2 3+ Cells	0
		Dual Positive Cells	0		Dual Positive Cells	0		Dual Positive Cells	0		Dual Positive Cells	0		Dual Positive Cells	0		Dual Positive Cells	0		Dual Positive Cells	0		Dual Positive Cells	0
		Dual Negative Cells	888		Dual Negative Cells	1119		Dual Negative Cells	549		Dual Negative Cells	2970		Dual Negative Cells	4499		Dual Negative Cells	2104		Dual Negative Cells	915		Dual Negative Cells	939
		% Stain 1 Positive Cells	69.3582		% Stain 1 Positive Cells	52.2407		% Stain 1 Positive Cells	72.0041		% Stain 1 Positive Cells	48.7224		% Stain 1 Positive Cells	56.0043		% Stain 1 Positive Cells	58.7289		% Stain 1 Positive Cells	79.9078		% Stain 1 Positive Cells	76.5309		64.1872
		% Stain 1 0+ Cells	30.6418		% Stain 1 0+ Cells	47.7593		% Stain 1 0+ Cells	27.9959		% Stain 1 0+ Cells	51.2776		% Stain 1 0+ Cells	43.9957		% Stain 1 0+ Cells	41.2711		% Stain 1 0+ Cells	20.0922		% Stain 1 0+ Cells	23.4691
		% Stain 1 1+ Cells	31.2974		% Stain 1 1+ Cells	23.6022		% Stain 1 1+ Cells	22.5905		% Stain 1 1+ Cells	17.386		% Stain 1 1+ Cells	19.9687		% Stain 1 1+ Cells	20.7925		% Stain 1 1+ Cells	15.7444		% Stain 1 1+ Cells	14.9213
		% Stain 1 2+ Cells	21.256		% Stain 1 2+ Cells	13.5723		% Stain 1 2+ Cells	23.8144		% Stain 1 2+ Cells	12.172		% Stain 1 2+ Cells	15.6659		% Stain 1 2+ Cells	18.0071		% Stain 1 2+ Cells	31.379		% Stain 1 2+ Cells	31.5671
		% Stain 1 3+ Cells	16.8047		% Stain 1 3+ Cells	15.0662		% Stain 1 3+ Cells	25.5992		% Stain 1 3+ Cells	19.1644		% Stain 1 3+ Cells	20.3696		% Stain 1 3+ Cells	19.9294		% Stain 1 3+ Cells	32.7844		% Stain 1 3+ Cells	30.0425
		Stain 1 H-Score	124.224		Stain 1 H-Score	95.9454		Stain 1 H-Score	147.017		Stain 1 H-Score	99.2231		Stain 1 H-Score	112.41		Stain 1 H-Score	116.595		Stain 1 H-Score	176.856		Stain 1 H-Score	168.183
		% Stain 2 Positive Cells	0		% Stain 2 Positive Cells	0		% Stain 2 Positive Cells	0		% Stain 2 Positive Cells	0		% Stain 2 Positive Cells	0		% Stain 2 Positive Cells	0		% Stain 2 Positive Cells	0		% Stain 2 Positive Cells	0
		% Stain 2 0+ Cells	100		% Stain 2 0+ Cells	100		% Stain 2 0+ Cells	100		% Stain 2 0+ Cells	100		% Stain 2 0+ Cells	100		% Stain 2 0+ Cells	100		% Stain 2 0+ Cells	100		% Stain 2 0+ Cells	100
		% Stain 2 1+ Cells	0		% Stain 2 1+ Cells	0		% Stain 2 1+ Cells	0		% Stain 2 1+ Cells	0		% Stain 2 1+ Cells	0		% Stain 2 1+ Cells	0		% Stain 2 1+ Cells	0		% Stain 2 1+ Cells	0
		% Stain 2 2+ Cells	0		% Stain 2 2+ Cells	0		% Stain 2 2+ Cells	0		% Stain 2 2+ Cells	0		% Stain 2 2+ Cells	0		% Stain 2 2+ Cells	0		% Stain 2 2+ Cells	0		% Stain 2 2+ Cells	0
		% Stain 2 3+ Cells	0		% Stain 2 3+ Cells	0		% Stain 2 3+ Cells	0		% Stain 2 3+ Cells	0		% Stain 2 3+ Cells	0		% Stain 2 3+ Cells	0		% Stain 2 3+ Cells	0		% Stain 2 3+ Cells	0
		Stain 2 H-Score	0		Stain 2 H-Score	0		Stain 2 H-Score	0		Stain 2 H-Score	0		Stain 2 H-Score	0		Stain 2 H-Score	0		Stain 2 H-Score	0		Stain 2 H-Score	0
		% Dual Positive Cells	0		% Dual Positive Cells	0		% Dual Positive Cells	0		% Dual Positive Cells	0		% Dual Positive Cells	0		% Dual Positive Cells	0		% Dual Positive Cells	0		% Dual Positive Cells	0
[truncated: 292 more rows]
