# Supplementary material for: CYRI-B-mediated macropinocytosis drives metastasis via lysophosphatidic acid receptor uptake
Source: eLife journal article supplement (doi:10.7554/elife.83712), 2024-05-07
Supplement: fig2-figsupp1-data2 [file Figure 2- figure supplement 1- source data 2 Excel D.xlsx]

## Sheet: Sheet1
		BSNA10.4d	HOM
		Layer 1			Layer 2			Layer 3			Layer 4			Layer 5			Layer 6			Layer 7			Layer 8			Average:
		Name	Value
		Classified Area (mm²)	1.06274		Name	Value		Name	Value		Name	Value		Name	Value		Name	Value		Name	Value		Name	Value
		Tumor Area (mm²)	1.00265		Classified Area (mm²)	0.6635		Classified Area (mm²)	1.00159		Classified Area (mm²)	0.44332		Classified Area (mm²)	0.41083		Classified Area (mm²)	0.54346		Classified Area (mm²)	0.78428		Classified Area (mm²)	0.74414
		Necrosis Area (mm²)	0		Tumor Area (mm²)	0.62541		Tumor Area (mm²)	0.95972		Tumor Area (mm²)	0.4409		Tumor Area (mm²)	0.39931		Tumor Area (mm²)	0.50056		Tumor Area (mm²)	0.74368		Tumor Area (mm²)	0.73355
		Empty Area (mm²)	0.04967		Necrosis Area (mm²)	0		Necrosis Area (mm²)	0		Necrosis Area (mm²)	0		Necrosis Area (mm²)	0		Necrosis Area (mm²)	0		Necrosis Area (mm²)	0		Necrosis Area (mm²)	0
		Normal Area (mm²)	0.01043		Empty Area (mm²)	0		Empty Area (mm²)	0.00127		Empty Area (mm²)	0.00116		Empty Area (mm²)	8e-05		Empty Area (mm²)	0.02676		Empty Area (mm²)	0.00404		Empty Area (mm²)	0.00018
		Total Cells	4110		Normal Area (mm²)	0.03809		Normal Area (mm²)	0.0406		Normal Area (mm²)	0.00126		Normal Area (mm²)	0.01143		Normal Area (mm²)	0.01614		Normal Area (mm²)	0.03656		Normal Area (mm²)	0.01042
		Stain 1 Positive Cells	75		Total Cells	3629		Total Cells	4880		Total Cells	1926		Total Cells	2108		Total Cells	2485		Total Cells	3667		Total Cells	4159
		Stain 1 0+ Cells	4035		Stain 1 Positive Cells	13		Stain 1 Positive Cells	62		Stain 1 Positive Cells	9		Stain 1 Positive Cells	33		Stain 1 Positive Cells	35		Stain 1 Positive Cells	72		Stain 1 Positive Cells	36
		Stain 1 1+ Cells	39		Stain 1 0+ Cells	3616		Stain 1 0+ Cells	4818		Stain 1 0+ Cells	1917		Stain 1 0+ Cells	2075		Stain 1 0+ Cells	2450		Stain 1 0+ Cells	3595		Stain 1 0+ Cells	4123
		Stain 1 2+ Cells	16		Stain 1 1+ Cells	12		Stain 1 1+ Cells	30		Stain 1 1+ Cells	7		Stain 1 1+ Cells	15		Stain 1 1+ Cells	17		Stain 1 1+ Cells	39		Stain 1 1+ Cells	17
		Stain 1 3+ Cells	20		Stain 1 2+ Cells	0		Stain 1 2+ Cells	21		Stain 1 2+ Cells	1		Stain 1 2+ Cells	13		Stain 1 2+ Cells	10		Stain 1 2+ Cells	22		Stain 1 2+ Cells	7
		Stain 2 Positive Cells	0		Stain 1 3+ Cells	1		Stain 1 3+ Cells	11		Stain 1 3+ Cells	1		Stain 1 3+ Cells	5		Stain 1 3+ Cells	8		Stain 1 3+ Cells	11		Stain 1 3+ Cells	12
		Stain 2 0+ Cells	4110		Stain 2 Positive Cells	0		Stain 2 Positive Cells	0		Stain 2 Positive Cells	0		Stain 2 Positive Cells	0		Stain 2 Positive Cells	0		Stain 2 Positive Cells	0		Stain 2 Positive Cells	0
		Stain 2 1+ Cells	0		Stain 2 0+ Cells	3629		Stain 2 0+ Cells	4880		Stain 2 0+ Cells	1926		Stain 2 0+ Cells	2108		Stain 2 0+ Cells	2485		Stain 2 0+ Cells	3667		Stain 2 0+ Cells	4159
		Stain 2 2+ Cells	0		Stain 2 1+ Cells	0		Stain 2 1+ Cells	0		Stain 2 1+ Cells	0		Stain 2 1+ Cells	0		Stain 2 1+ Cells	0		Stain 2 1+ Cells	0		Stain 2 1+ Cells	0
		Stain 2 3+ Cells	0		Stain 2 2+ Cells	0		Stain 2 2+ Cells	0		Stain 2 2+ Cells	0		Stain 2 2+ Cells	0		Stain 2 2+ Cells	0		Stain 2 2+ Cells	0		Stain 2 2+ Cells	0
		Dual Positive Cells	0		Stain 2 3+ Cells	0		Stain 2 3+ Cells	0		Stain 2 3+ Cells	0		Stain 2 3+ Cells	0		Stain 2 3+ Cells	0		Stain 2 3+ Cells	0		Stain 2 3+ Cells	0
		Dual Negative Cells	4035		Dual Positive Cells	0		Dual Positive Cells	0		Dual Positive Cells	0		Dual Positive Cells	0		Dual Positive Cells	0		Dual Positive Cells	0		Dual Positive Cells	0
		% Stain 1 Positive Cells	1.82482		Dual Negative Cells	3616		Dual Negative Cells	4818		Dual Negative Cells	1917		Dual Negative Cells	2075		Dual Negative Cells	2450		Dual Negative Cells	3595		Dual Negative Cells	4123
		% Stain 1 0+ Cells	98.1752		% Stain 1 Positive Cells	0.358225		% Stain 1 Positive Cells	1.27049		% Stain 1 Positive Cells	0.46729		% Stain 1 Positive Cells	1.56546		% Stain 1 Positive Cells	1.40845		% Stain 1 Positive Cells	1.96346		% Stain 1 Positive Cells	0.865593
		% Stain 1 1+ Cells	0.948905		% Stain 1 0+ Cells	99.6418		% Stain 1 0+ Cells	98.7295		% Stain 1 0+ Cells	99.5327		% Stain 1 0+ Cells	98.4345		% Stain 1 0+ Cells	98.5915		% Stain 1 0+ Cells	98.0365		% Stain 1 0+ Cells	99.1344
		% Stain 1 2+ Cells	0.389294		% Stain 1 1+ Cells	0.33067		% Stain 1 1+ Cells	0.614754		% Stain 1 1+ Cells	0.363448		% Stain 1 1+ Cells	0.711575		% Stain 1 1+ Cells	0.684105		% Stain 1 1+ Cells	1.06354		% Stain 1 1+ Cells	0.408752
		% Stain 1 3+ Cells	0.486618		% Stain 1 2+ Cells	0		% Stain 1 2+ Cells	0.430328		% Stain 1 2+ Cells	0.0519211		% Stain 1 2+ Cells	0.616698		% Stain 1 2+ Cells	0.402414		% Stain 1 2+ Cells	0.599945		% Stain 1 2+ Cells	0.16831
		Stain 1 H-Score	3.18735		% Stain 1 3+ Cells	0.0275558		% Stain 1 3+ Cells	0.22541		% Stain 1 3+ Cells	0.0519211		% Stain 1 3+ Cells	0.237192		% Stain 1 3+ Cells	0.321932		% Stain 1 3+ Cells	0.299973		% Stain 1 3+ Cells	0.288531
		% Stain 2 Positive Cells	0		Stain 1 H-Score	0.413337		Stain 1 H-Score	2.15164		Stain 1 H-Score	0.623053		Stain 1 H-Score	2.65655		Stain 1 H-Score	2.45473		Stain 1 H-Score	3.16335		Stain 1 H-Score	1.61096
		% Stain 2 0+ Cells	100		% Stain 2 Positive Cells	0		% Stain 2 Positive Cells	0		% Stain 2 Positive Cells	0		% Stain 2 Positive Cells	0		% Stain 2 Positive Cells	0		% Stain 2 Positive Cells	0		% Stain 2 Positive Cells	0
		% Stain 2 1+ Cells	0		% Stain 2 0+ Cells	100		% Stain 2 0+ Cells	100		% Stain 2 0+ Cells	100		% Stain 2 0+ Cells	100		% Stain 2 0+ Cells	100		% Stain 2 0+ Cells	100		% Stain 2 0+ Cells	100
		% Stain 2 2+ Cells	0		% Stain 2 1+ Cells	0		% Stain 2 1+ Cells	0		% Stain 2 1+ Cells	0		% Stain 2 1+ Cells	0		% Stain 2 1+ Cells	0		% Stain 2 1+ Cells	0		% Stain 2 1+ Cells	0
		% Stain 2 3+ Cells	0		% Stain 2 2+ Cells	0		% Stain 2 2+ Cells	0		% Stain 2 2+ Cells	0		% Stain 2 2+ Cells	0		% Stain 2 2+ Cells	0		% Stain 2 2+ Cells	0		% Stain 2 2+ Cells	0
		Stain 2 H-Score	0		% Stain 2 3+ Cells	0		% Stain 2 3+ Cells	0		% Stain 2 3+ Cells	0		% Stain 2 3+ Cells	0		% Stain 2 3+ Cells	0		% Stain 2 3+ Cells	0		% Stain 2 3+ Cells	0
		% Dual Positive Cells	0		Stain 2 H-Score	0		Stain 2 H-Score	0		Stain 2 H-Score	0		Stain 2 H-Score	0		Stain 2 H-Score	0		Stain 2 H-Score	0		Stain 2 H-Score	0
		% Dual Negative Cells	98.1752		% Dual Positive Cells	0		% Dual Positive Cells	0		% Dual Positive Cells	0		% Dual Positive Cells	0		% Dual Positive Cells	0		% Dual Positive Cells	0		% Dual Positive Cells	0
		Avg Stain 1 Nuclear OD	0.0381403		% Dual Negative Cells	99.6418		% Dual Negative Cells	98.7295		% Dual Negative Cells	99.5327		% Dual Negative Cells	98.4345		% Dual Negative Cells	98.5915		% Dual Negative Cells	98.0365		% Dual Negative Cells	99.1344
		Avg Stain 2 Nuclear OD	0.037095		Avg Stain 1 Nuclear OD	0.0295517		Avg Stain 1 Nuclear OD	0.0347031		Avg Stain 1 Nuclear OD	0.0297886		Avg Stain 1 Nuclear OD	0.0363198		Avg Stain 1 Nuclear OD	0.0368816		Avg Stain 1 Nuclear OD	0.0408328		Avg Stain 1 Nuclear OD	0.0340809
		Avg Stain 1 Cytoplasmic OD	0.0303914		Avg Stain 2 Nuclear OD	0.0362943		Avg Stain 2 Nuclear OD	0.0364543		Avg Stain 2 Nuclear OD	0.0368442		Avg Stain 2 Nuclear OD	0.0363302		Avg Stain 2 Nuclear OD	0.0358741		Avg Stain 2 Nuclear OD	0.0361984		Avg Stain 2 Nuclear OD	0.0361857
		Avg Stain 2 Cytoplasmic OD	0.0322796		Avg Stain 1 Cytoplasmic OD	0.0293077		Avg Stain 1 Cytoplasmic OD	0.0302459		Avg Stain 1 Cytoplasmic OD	0.0288877		Avg Stain 1 Cytoplasmic OD	0.0305316		Avg Stain 1 Cytoplasmic OD	0.0314086		Avg Stain 1 Cytoplasmic OD	0.0325516		Avg Stain 1 Cytoplasmic OD	0.0300295
		Avg Cell Area (µm²)	98.712		Avg Stain 2 Cytoplasmic OD	0.0319223		Avg Stain 2 Cytoplasmic OD	0.0321578		Avg Stain 2 Cytoplasmic OD	0.0322875		Avg Stain 2 Cytoplasmic OD	0.0320651		Avg Stain 2 Cytoplasmic OD	0.0316954		Avg Stain 2 Cytoplasmic OD	0.0316266		Avg Stain 2 Cytoplasmic OD	0.0322805
		Avg Cytoplasm Area (µm²)	66.2502		Avg Cell Area (µm²)	90.0608		Avg Cell Area (µm²)	96.2925		Avg Cell Area (µm²)	101.591		Avg Cell Area (µm²)	92.6099		Avg Cell Area (µm²)	95.4358		Avg Cell Area (µm²)	92.1875		Avg Cell Area (µm²)	85.1297
		Avg Nucleus Area (µm²)	32.4618		Avg Cytoplasm Area (µm²)	59.0447		Avg Cytoplasm Area (µm²)	65.282		Avg Cytoplasm Area (µm²)	68.6284		Avg Cytoplasm Area (µm²)	65.2866		Avg Cytoplasm Area (µm²)	66.0394		Avg Cytoplasm Area (µm²)	64.9823		Avg Cytoplasm Area (µm²)	61.3345
		Avg Nucleus Perimeter (µm)	12.8253		Avg Nucleus Area (µm²)	31.0161		Avg Nucleus Area (µm²)	31.0105		Avg Nucleus Area (µm²)	32.9628		Avg Nucleus Area (µm²)	27.3233		Avg Nucleus Area (µm²)	29.3964		Avg Nucleus Area (µm²)	27.2052		Avg Nucleus Area (µm²)	23.7953
		Avg Nucleus Roundness	0.678874		Avg Nucleus Perimeter (µm)	12.2902		Avg Nucleus Perimeter (µm)	12.2704		Avg Nucleus Perimeter (µm)	13.0516		Avg Nucleus Perimeter (µm)	10.8438		Avg Nucleus Perimeter (µm)	11.6419		Avg Nucleus Perimeter (µm)	10.8041		Avg Nucleus Perimeter (µm)	9.45831
		Tissue Area (µm²)	770602		Avg Nucleus Roundness	0.677125		Avg Nucleus Roundness	0.684376		Avg Nucleus Roundness	0.675744		Avg Nucleus Roundness	0.682549		Avg Nucleus Roundness	0.687829		Avg Nucleus Roundness	0.678602		Avg Nucleus Roundness	0.681672
		Tumor: Total Cells	4110		Tissue Area (µm²)	627968		Tissue Area (µm²)	958031		Tissue Area (µm²)	384485		Tissue Area (µm²)	399292		Tissue Area (µm²)	469363		Tissue Area (µm²)	720336		Tissue Area (µm²)	723720
		Tumor: Stain 1 Positive Cells	75		Tumor: Total Cells	3629		Tumor: Total Cells	4880		Tumor: Total Cells	1926		Tumor: Total Cells	2108		Tumor: Total Cells	2485		Tumor: Total Cells	3667		Tumor: Total Cells	4159
		Tumor: Stain 1 0+ Cells	4035		Tumor: Stain 1 Positive Cells	13		Tumor: Stain 1 Positive Cells	62		Tumor: Stain 1 Positive Cells	9		Tumor: Stain 1 Positive Cells	33		Tumor: Stain 1 Positive Cells	35		Tumor: Stain 1 Positive Cells	72		Tumor: Stain 1 Positive Cells	36
		Tumor: Stain 1 1+ Cells	39		Tumor: Stain 1 0+ Cells	3616		Tumor: Stain 1 0+ Cells	4818		Tumor: Stain 1 0+ Cells	1917		Tumor: Stain 1 0+ Cells	2075		Tumor: Stain 1 0+ Cells	2450		Tumor: Stain 1 0+ Cells	3595		Tumor: Stain 1 0+ Cells	4123
		Tumor: Stain 1 2+ Cells	16		Tumor: Stain 1 1+ Cells	12		Tumor: Stain 1 1+ Cells	30		Tumor: Stain 1 1+ Cells	7		Tumor: Stain 1 1+ Cells	15		Tumor: Stain 1 1+ Cells	17		Tumor: Stain 1 1+ Cells	39		Tumor: Stain 1 1+ Cells	17
		Tumor: Stain 1 3+ Cells	20		Tumor: Stain 1 2+ Cells	0		Tumor: Stain 1 2+ Cells	21		Tumor: Stain 1 2+ Cells	1		Tumor: Stain 1 2+ Cells	13		Tumor: Stain 1 2+ Cells	10		Tumor: Stain 1 2+ Cells	22		Tumor: Stain 1 2+ Cells	7
		Tumor: Stain 2 Positive Cells	0		Tumor: Stain 1 3+ Cells	1		Tumor: Stain 1 3+ Cells	11		Tumor: Stain 1 3+ Cells	1		Tumor: Stain 1 3+ Cells	5		Tumor: Stain 1 3+ Cells	8		Tumor: Stain 1 3+ Cells	11		Tumor: Stain 1 3+ Cells	12
		Tumor: Stain 2 0+ Cells	4110		Tumor: Stain 2 Positive Cells	0		Tumor: Stain 2 Positive Cells	0		Tumor: Stain 2 Positive Cells	0		Tumor: Stain 2 Positive Cells	0		Tumor: Stain 2 Positive Cells	0		Tumor: Stain 2 Positive Cells	0		Tumor: Stain 2 Positive Cells	0
		Tumor: Stain 2 1+ Cells	0		Tumor: Stain 2 0+ Cells	3629		Tumor: Stain 2 0+ Cells	4880		Tumor: Stain 2 0+ Cells	1926		Tumor: Stain 2 0+ Cells	2108		Tumor: Stain 2 0+ Cells	2485		Tumor: Stain 2 0+ Cells	3667		Tumor: Stain 2 0+ Cells	4159
		Tumor: Stain 2 2+ Cells	0		Tumor: Stain 2 1+ Cells	0		Tumor: Stain 2 1+ Cells	0		Tumor: Stain 2 1+ Cells	0		Tumor: Stain 2 1+ Cells	0		Tumor: Stain 2 1+ Cells	0		Tumor: Stain 2 1+ Cells	0		Tumor: Stain 2 1+ Cells	0
		Tumor: Stain 2 3+ Cells	0		Tumor: Stain 2 2+ Cells	0		Tumor: Stain 2 2+ Cells	0		Tumor: Stain 2 2+ Cells	0		Tumor: Stain 2 2+ Cells	0		Tumor: Stain 2 2+ Cells	0		Tumor: Stain 2 2+ Cells	0		Tumor: Stain 2 2+ Cells	0
		Tumor: Dual Positive Cells	0		Tumor: Stain 2 3+ Cells	0		Tumor: Stain 2 3+ Cells	0		Tumor: Stain 2 3+ Cells	0		Tumor: Stain 2 3+ Cells	0		Tumor: Stain 2 3+ Cells	0		Tumor: Stain 2 3+ Cells	0		Tumor: Stain 2 3+ Cells	0
		Tumor: Dual Negative Cells	4035		Tumor: Dual Positive Cells	0		Tumor: Dual Positive Cells	0		Tumor: Dual Positive Cells	0		Tumor: Dual Positive Cells	0		Tumor: Dual Positive Cells	0		Tumor: Dual Positive Cells	0		Tumor: Dual Positive Cells	0
		Tumor: % Stain 1 Positive Cells	1.82482		Tumor: Dual Negative Cells	3616		Tumor: Dual Negative Cells	4818		Tumor: Dual Negative Cells	1917		Tumor: Dual Negative Cells	2075		Tumor: Dual Negative Cells	2450		Tumor: Dual Negative Cells	3595		Tumor: Dual Negative Cells	4123
		Tumor: % Stain 1 0+ Cells	98.1752		Tumor: % Stain 1 Positive Cells	0.358225		Tumor: % Stain 1 Positive Cells	1.27049		Tumor: % Stain 1 Positive Cells	0.46729		Tumor: % Stain 1 Positive Cells	1.56546		Tumor: % Stain 1 Positive Cells	1.40845		Tumor: % Stain 1 Positive Cells	1.96346		Tumor: % Stain 1 Positive Cells	0.865593		1.21547
		Tumor: % Stain 1 1+ Cells	0.948905		Tumor: % Stain 1 0+ Cells	99.6418		Tumor: % Stain 1 0+ Cells	98.7295		Tumor: % Stain 1 0+ Cells	99.5327		Tumor: % Stain 1 0+ Cells	98.4345		Tumor: % Stain 1 0+ Cells	98.5915		Tumor: % Stain 1 0+ Cells	98.0365		Tumor: % Stain 1 0+ Cells	99.1344
		Tumor: % Stain 1 2+ Cells	0.389294		Tumor: % Stain 1 1+ Cells	0.33067		Tumor: % Stain 1 1+ Cells	0.614754		Tumor: % Stain 1 1+ Cells	0.363448		Tumor: % Stain 1 1+ Cells	0.711575		Tumor: % Stain 1 1+ Cells	0.684105		Tumor: % Stain 1 1+ Cells	1.06354		Tumor: % Stain 1 1+ Cells	0.408752
		Tumor: % Stain 1 3+ Cells	0.486618		Tumor: % Stain 1 2+ Cells	0		Tumor: % Stain 1 2+ Cells	0.430328		Tumor: % Stain 1 2+ Cells	0.0519211		Tumor: % Stain 1 2+ Cells	0.616698		Tumor: % Stain 1 2+ Cells	0.402414		Tumor: % Stain 1 2+ Cells	0.599945		Tumor: % Stain 1 2+ Cells	0.16831
		Tumor: Stain 1 H-Score	3.18735		Tumor: % Stain 1 3+ Cells	0.0275558		Tumor: % Stain 1 3+ Cells	0.22541		Tumor: % Stain 1 3+ Cells	0.0519211		Tumor: % Stain 1 3+ Cells	0.237192		Tumor: % Stain 1 3+ Cells	0.321932		Tumor: % Stain 1 3+ Cells	0.299973		Tumor: % Stain 1 3+ Cells	0.288531
		Tumor: % Stain 2 Positive Cells	0		Tumor: Stain 1 H-Score	0.413337		Tumor: Stain 1 H-Score	2.15164		Tumor: Stain 1 H-Score	0.623053		Tumor: Stain 1 H-Score	2.65655		Tumor: Stain 1 H-Score	2.45473		Tumor: Stain 1 H-Score	3.16335		Tumor: Stain 1 H-Score	1.61096
		Tumor: % Stain 2 0+ Cells	100		Tumor: % Stain 2 Positive Cells	0		Tumor: % Stain 2 Positive Cells	0		Tumor: % Stain 2 Positive Cells	0		Tumor: % Stain 2 Positive Cells	0		Tumor: % Stain 2 Positive Cells	0		Tumor: % Stain 2 Positive Cells	0		Tumor: % Stain 2 Positive Cells	0
		Tumor: % Stain 2 1+ Cells	0		Tumor: % Stain 2 0+ Cells	100		Tumor: % Stain 2 0+ Cells	100		Tumor: % Stain 2 0+ Cells	100		Tumor: % Stain 2 0+ Cells	100		Tumor: % Stain 2 0+ Cells	100		Tumor: % Stain 2 0+ Cells	100		Tumor: % Stain 2 0+ Cells	100
		Tumor: % Stain 2 2+ Cells	0		Tumor: % Stain 2 1+ Cells	0		Tumor: % Stain 2 1+ Cells	0		Tumor: % Stain 2 1+ Cells	0		Tumor: % Stain 2 1+ Cells	0		Tumor: % Stain 2 1+ Cells	0		Tumor: % Stain 2 1+ Cells	0		Tumor: % Stain 2 1+ Cells	0
		Tumor: % Stain 2 3+ Cells	0		Tumor: % Stain 2 2+ Cells	0		Tumor: % Stain 2 2+ Cells	0		Tumor: % Stain 2 2+ Cells	0		Tumor: % Stain 2 2+ Cells	0		Tumor: % Stain 2 2+ Cells	0		Tumor: % Stain 2 2+ Cells	0		Tumor: % Stain 2 2+ Cells	0
		Tumor: Stain 2 H-Score	0		Tumor: % Stain 2 3+ Cells	0		Tumor: % Stain 2 3+ Cells	0		Tumor: % Stain 2 3+ Cells	0		Tumor: % Stain 2 3+ Cells	0		Tumor: % Stain 2 3+ Cells	0		Tumor: % Stain 2 3+ Cells	0		Tumor: % Stain 2 3+ Cells	0
		Tumor: % Dual Positive Cells	0		Tumor: Stain 2 H-Score	0		Tumor: Stain 2 H-Score	0		Tumor: Stain 2 H-Score	0		Tumor: Stain 2 H-Score	0		Tumor: Stain 2 H-Score	0		Tumor: Stain 2 H-Score	0		Tumor: Stain 2 H-Score	0
		Tumor: % Dual Negative Cells	98.1752		Tumor: % Dual Positive Cells	0		Tumor: % Dual Positive Cells	0		Tumor: % Dual Positive Cells	0		Tumor: % Dual Positive Cells	0		Tumor: % Dual Positive Cells	0		Tumor: % Dual Positive Cells	0		Tumor: % Dual Positive Cells	0
		Tumor: Avg Stain 1 Nuclear OD	0.0381403		Tumor: % Dual Negative Cells	99.6418		Tumor: % Dual Negative Cells	98.7295		Tumor: % Dual Negative Cells	99.5327		Tumor: % Dual Negative Cells	98.4345		Tumor: % Dual Negative Cells	98.5915		Tumor: % Dual Negative Cells	98.0365		Tumor: % Dual Negative Cells	99.1344
		Tumor: Avg Stain 2 Nuclear OD	0.037095		Tumor: Avg Stain 1 Nuclear OD	0.0295517		Tumor: Avg Stain 1 Nuclear OD	0.0347031		Tumor: Avg Stain 1 Nuclear OD	0.0297886		Tumor: Avg Stain 1 Nuclear OD	0.0363198		Tumor: Avg Stain 1 Nuclear OD	0.0368816		Tumor: Avg Stain 1 Nuclear OD	0.0408328		Tumor: Avg Stain 1 Nuclear OD	0.0340809
		Tumor: Avg Stain 1 Cytoplasmic OD	0.0303914		Tumor: Avg Stain 2 Nuclear OD	0.0362943		Tumor: Avg Stain 2 Nuclear OD	0.0364543		Tumor: Avg Stain 2 Nuclear OD	0.0368442		Tumor: Avg Stain 2 Nuclear OD	0.0363302		Tumor: Avg Stain 2 Nuclear OD	0.0358741		Tumor: Avg Stain 2 Nuclear OD	0.0361984		Tumor: Avg Stain 2 Nuclear OD	0.0361857
		Tumor: Avg Stain 2 Cytoplasmic OD	0.0322796		Tumor: Avg Stain 1 Cytoplasmic OD	0.0293077		Tumor: Avg Stain 1 Cytoplasmic OD	0.0302459		Tumor: Avg Stain 1 Cytoplasmic OD	0.0288877		Tumor: Avg Stain 1 Cytoplasmic OD	0.0305316		Tumor: Avg Stain 1 Cytoplasmic OD	0.0314086		Tumor: Avg Stain 1 Cytoplasmic OD	0.0325516		Tumor: Avg Stain 1 Cytoplasmic OD	0.0300295
		Tumor: Avg Cell Area (µm²)	98.712		Tumor: Avg Stain 2 Cytoplasmic OD	0.0319223		Tumor: Avg Stain 2 Cytoplasmic OD	0.0321578		Tumor: Avg Stain 2 Cytoplasmic OD	0.0322875		Tumor: Avg Stain 2 Cytoplasmic OD	0.0320651		Tumor: Avg Stain 2 Cytoplasmic OD	0.0316954		Tumor: Avg Stain 2 Cytoplasmic OD	0.0316266		Tumor: Avg Stain 2 Cytoplasmic OD	0.0322805
		Tumor: Avg Cytoplasm Area (µm²)	66.2502		Tumor: Avg Cell Area (µm²)	90.0608		Tumor: Avg Cell Area (µm²)	96.2925		Tumor: Avg Cell Area (µm²)	101.591		Tumor: Avg Cell Area (µm²)	92.6099		Tumor: Avg Cell Area (µm²)	95.4358		Tumor: Avg Cell Area (µm²)	92.1875		Tumor: Avg Cell Area (µm²)	85.1297
		Tumor: Avg Nucleus Area (µm²)	32.4618		Tumor: Avg Cytoplasm Area (µm²)	59.0447		Tumor: Avg Cytoplasm Area (µm²)	65.282		Tumor: Avg Cytoplasm Area (µm²)	68.6284		Tumor: Avg Cytoplasm Area (µm²)	65.2866		Tumor: Avg Cytoplasm Area (µm²)	66.0394		Tumor: Avg Cytoplasm Area (µm²)	64.9823		Tumor: Avg Cytoplasm Area (µm²)	61.3345
		Tumor: Avg Nucleus Perimeter (µm)	12.8253		Tumor: Avg Nucleus Area (µm²)	31.0161		Tumor: Avg Nucleus Area (µm²)	31.0105		Tumor: Avg Nucleus Area (µm²)	32.9628		Tumor: Avg Nucleus Area (µm²)	27.3233		Tumor: Avg Nucleus Area (µm²)	29.3964		Tumor: Avg Nucleus Area (µm²)	27.2052		Tumor: Avg Nucleus Area (µm²)	23.7953
		Tumor: Avg Nucleus Roundness	0.678874		Tumor: Avg Nucleus Perimeter (µm)	12.2902		Tumor: Avg Nucleus Perimeter (µm)	12.2704		Tumor: Avg Nucleus Perimeter (µm)	13.0516		Tumor: Avg Nucleus Perimeter (µm)	10.8438		Tumor: Avg Nucleus Perimeter (µm)	11.6419		Tumor: Avg Nucleus Perimeter (µm)	10.8041		Tumor: Avg Nucleus Perimeter (µm)	9.45831
		Tumor: Tissue Area (µm²)	770602		Tumor: Avg Nucleus Roundness	0.677125		Tumor: Avg Nucleus Roundness	0.684376		Tumor: Avg Nucleus Roundness	0.675744		Tumor: Avg Nucleus Roundness	0.682549		Tumor: Avg Nucleus Roundness	0.687829		Tumor: Avg Nucleus Roundness	0.678602		Tumor: Avg Nucleus Roundness	0.681672
					Tumor: Tissue Area (µm²)	627968		Tumor: Tissue Area (µm²)	958031		Tumor: Tissue Area (µm²)	384485		Tumor: Tissue Area (µm²)	399292		Tumor: Tissue Area (µm²)	469363		Tumor: Tissue Area (µm²)	720336		Tumor: Tissue Area (µm²)	723720
		BSNA8.2c	HOM
		Name	Value		Name	Value		Name	Value		Name	Value		Name	Value		Name	Value		Name	Value		Name	Value
		Classified Area (mm²)	0.84106		Classified Area (mm²)	0.77418		Classified Area (mm²)	0.99485		Classified Area (mm²)	1.48111		Classified Area (mm²)	0.70761		Classified Area (mm²)	0.75865		Classified Area (mm²)	0.89894		Classified Area (mm²)	1.20234
		Tumor Area (mm²)	0.788		Tumor Area (mm²)	0.7455		Tumor Area (mm²)	0.88263		Tumor Area (mm²)	1.4167		Tumor Area (mm²)	0.64567		Tumor Area (mm²)	0.7316		Tumor Area (mm²)	0.66783		Tumor Area (mm²)	1.19401
		Necrosis Area (mm²)	0		Necrosis Area (mm²)	0		Necrosis Area (mm²)	0		Necrosis Area (mm²)	0		Necrosis Area (mm²)	0		Necrosis Area (mm²)	0		Necrosis Area (mm²)	0		Necrosis Area (mm²)	0.00047
		Empty Area (mm²)	0.0121		Empty Area (mm²)	0.00271		Empty Area (mm²)	0.00569		Empty Area (mm²)	0.00066		Empty Area (mm²)	4e-05		Empty Area (mm²)	0.00396		Empty Area (mm²)	0.01447		Empty Area (mm²)	0.0018
		Normal Area (mm²)	0.04095		Normal Area (mm²)	0.02596		Normal Area (mm²)	0.10654		Normal Area (mm²)	0.06375		Normal Area (mm²)	0.06191		Normal Area (mm²)	0.02309		Normal Area (mm²)	0.21664		Normal Area (mm²)	0.00605
		Total Cells	2909		Total Cells	3351		Total Cells	3641		Total Cells	6059		Total Cells	3115		Total Cells	2887		Total Cells	4289		Total Cells	5557
		Stain 1 Positive Cells	126		Stain 1 Positive Cells	83		Stain 1 Positive Cells	67		Stain 1 Positive Cells	138		Stain 1 Positive Cells	54		Stain 1 Positive Cells	57		Stain 1 Positive Cells	12		Stain 1 Positive Cells	73
		Stain 1 0+ Cells	2783		Stain 1 0+ Cells	3268		Stain 1 0+ Cells	3574		Stain 1 0+ Cells	5921		Stain 1 0+ Cells	3061		Stain 1 0+ Cells	2830		Stain 1 0+ Cells	4277		Stain 1 0+ Cells	5484
		Stain 1 1+ Cells	70		Stain 1 1+ Cells	54		Stain 1 1+ Cells	33		Stain 1 1+ Cells	66		Stain 1 1+ Cells	26		Stain 1 1+ Cells	31		Stain 1 1+ Cells	6		Stain 1 1+ Cells	30
		Stain 1 2+ Cells	35		Stain 1 2+ Cells	13		Stain 1 2+ Cells	19		Stain 1 2+ Cells	33		Stain 1 2+ Cells	20		Stain 1 2+ Cells	16		Stain 1 2+ Cells	5		Stain 1 2+ Cells	22
		Stain 1 3+ Cells	21		Stain 1 3+ Cells	16		Stain 1 3+ Cells	15		Stain 1 3+ Cells	39		Stain 1 3+ Cells	8		Stain 1 3+ Cells	10		Stain 1 3+ Cells	1		Stain 1 3+ Cells	21
		Stain 2 Positive Cells	0		Stain 2 Positive Cells	0		Stain 2 Positive Cells	0		Stain 2 Positive Cells	0		Stain 2 Positive Cells	0		Stain 2 Positive Cells	0		Stain 2 Positive Cells	0		Stain 2 Positive Cells	0
		Stain 2 0+ Cells	2909		Stain 2 0+ Cells	3351		Stain 2 0+ Cells	3641		Stain 2 0+ Cells	6059		Stain 2 0+ Cells	3115		Stain 2 0+ Cells	2887		Stain 2 0+ Cells	4289		Stain 2 0+ Cells	5557
		Stain 2 1+ Cells	0		Stain 2 1+ Cells	0		Stain 2 1+ Cells	0		Stain 2 1+ Cells	0		Stain 2 1+ Cells	0		Stain 2 1+ Cells	0		Stain 2 1+ Cells	0		Stain 2 1+ Cells	0
		Stain 2 2+ Cells	0		Stain 2 2+ Cells	0		Stain 2 2+ Cells	0		Stain 2 2+ Cells	0		Stain 2 2+ Cells	0		Stain 2 2+ Cells	0		Stain 2 2+ Cells	0		Stain 2 2+ Cells	0
		Stain 2 3+ Cells	0		Stain 2 3+ Cells	0		Stain 2 3+ Cells	0		Stain 2 3+ Cells	0		Stain 2 3+ Cells	0		Stain 2 3+ Cells	0		Stain 2 3+ Cells	0		Stain 2 3+ Cells	0
		Dual Positive Cells	0		Dual Positive Cells	0		Dual Positive Cells	0		Dual Positive Cells	0		Dual Positive Cells	0		Dual Positive Cells	0		Dual Positive Cells	0		Dual Positive Cells	0
		Dual Negative Cells	2783		Dual Negative Cells	3268		Dual Negative Cells	3574		Dual Negative Cells	5921		Dual Negative Cells	3061		Dual Negative Cells	2830		Dual Negative Cells	4277		Dual Negative Cells	5484
		% Stain 1 Positive Cells	4.33139		% Stain 1 Positive Cells	2.47687		% Stain 1 Positive Cells	1.84015		% Stain 1 Positive Cells	2.2776		% Stain 1 Positive Cells	1.73355		% Stain 1 Positive Cells	1.97437		% Stain 1 Positive Cells	0.279785		% Stain 1 Positive Cells	1.31366
		% Stain 1 0+ Cells	95.6686		% Stain 1 0+ Cells	97.5231		% Stain 1 0+ Cells	98.1598		% Stain 1 0+ Cells	97.7224		% Stain 1 0+ Cells	98.2665		% Stain 1 0+ Cells	98.0256		% Stain 1 0+ Cells	99.7202		% Stain 1 0+ Cells	98.6863
		% Stain 1 1+ Cells	2.40633		% Stain 1 1+ Cells	1.61146		% Stain 1 1+ Cells	0.906344		% Stain 1 1+ Cells	1.08929		% Stain 1 1+ Cells	0.834671		% Stain 1 1+ Cells	1.07378		% Stain 1 1+ Cells	0.139893		% Stain 1 1+ Cells	0.53986
		% Stain 1 2+ Cells	1.20316		% Stain 1 2+ Cells	0.387944		% Stain 1 2+ Cells	0.521835		% Stain 1 2+ Cells	0.544644		% Stain 1 2+ Cells	0.642055		% Stain 1 2+ Cells	0.554209		% Stain 1 2+ Cells	0.116577		% Stain 1 2+ Cells	0.395897
		% Stain 1 3+ Cells	0.721898		% Stain 1 3+ Cells	0.477469		% Stain 1 3+ Cells	0.411975		% Stain 1 3+ Cells	0.643671		% Stain 1 3+ Cells	0.256822		% Stain 1 3+ Cells	0.34638		% Stain 1 3+ Cells	0.0233155		% Stain 1 3+ Cells	0.377902
		Stain 1 H-Score	6.97834		Stain 1 H-Score	3.81976		Stain 1 H-Score	3.18594		Stain 1 H-Score	4.10959		Stain 1 H-Score	2.88925		Stain 1 H-Score	3.22134		Stain 1 H-Score	0.442994		Stain 1 H-Score	2.46536
		% Stain 2 Positive Cells	0		% Stain 2 Positive Cells	0		% Stain 2 Positive Cells	0		% Stain 2 Positive Cells	0		% Stain 2 Positive Cells	0		% Stain 2 Positive Cells	0		% Stain 2 Positive Cells	0		% Stain 2 Positive Cells	0
		% Stain 2 0+ Cells	100		% Stain 2 0+ Cells	100		% Stain 2 0+ Cells	100		% Stain 2 0+ Cells	100		% Stain 2 0+ Cells	100		% Stain 2 0+ Cells	100		% Stain 2 0+ Cells	100		% Stain 2 0+ Cells	100
		% Stain 2 1+ Cells	0		% Stain 2 1+ Cells	0		% Stain 2 1+ Cells	0		% Stain 2 1+ Cells	0		% Stain 2 1+ Cells	0		% Stain 2 1+ Cells	0		% Stain 2 1+ Cells	0		% Stain 2 1+ Cells	0
		% Stain 2 2+ Cells	0		% Stain 2 2+ Cells	0		% Stain 2 2+ Cells	0		% Stain 2 2+ Cells	0		% Stain 2 2+ Cells	0		% Stain 2 2+ Cells	0		% Stain 2 2+ Cells	0		% Stain 2 2+ Cells	0
		% Stain 2 3+ Cells	0		% Stain 2 3+ Cells	0		% Stain 2 3+ Cells	0		% Stain 2 3+ Cells	0		% Stain 2 3+ Cells	0		% Stain 2 3+ Cells	0		% Stain 2 3+ Cells	0		% Stain 2 3+ Cells	0
		Stain 2 H-Score	0		Stain 2 H-Score	0		Stain 2 H-Score	0		Stain 2 H-Score	0		Stain 2 H-Score	0		Stain 2 H-Score	0		Stain 2 H-Score	0		Stain 2 H-Score	0
		% Dual Positive Cells	0		% Dual Positive Cells	0		% Dual Positive Cells	0		% Dual Positive Cells	0		% Dual Positive Cells	0		% Dual Positive Cells	0		% Dual Positive Cells	0		% Dual Positive Cells	0
		% Dual Negative Cells	95.6686		% Dual Negative Cells	97.5231		% Dual Negative Cells	98.1598		% Dual Negative Cells	97.7224		% Dual Negative Cells	98.2665		% Dual Negative Cells	98.0256		% Dual Negative Cells	99.7202		% Dual Negative Cells	98.6863
		Avg Stain 1 Nuclear OD	0.0533577		Avg Stain 1 Nuclear OD	0.0425728		Avg Stain 1 Nuclear OD	0.0376587		Avg Stain 1 Nuclear OD	0.0413745		Avg Stain 1 Nuclear OD	0.0370837		Avg Stain 1 Nuclear OD	0.0389427		Avg Stain 1 Nuclear OD	0.0305281		Avg Stain 1 Nuclear OD	0.0360963
		Avg Stain 2 Nuclear OD	0.0378715		Avg Stain 2 Nuclear OD	0.0374233		Avg Stain 2 Nuclear OD	0.0376957		Avg Stain 2 Nuclear OD	0.0379088		Avg Stain 2 Nuclear OD	0.0372956		Avg Stain 2 Nuclear OD	0.0377621		Avg Stain 2 Nuclear OD	0.0361034		Avg Stain 2 Nuclear OD	0.0374001
		Avg Stain 1 Cytoplasmic OD	0.0345232		Avg Stain 1 Cytoplasmic OD	0.0318931		Avg Stain 1 Cytoplasmic OD	0.0306702		Avg Stain 1 Cytoplasmic OD	0.0312259		Avg Stain 1 Cytoplasmic OD	0.0303446		Avg Stain 1 Cytoplasmic OD	0.0312532		Avg Stain 1 Cytoplasmic OD	0.030275		Avg Stain 1 Cytoplasmic OD	0.0305442
		Avg Stain 2 Cytoplasmic OD	0.032422		Avg Stain 2 Cytoplasmic OD	0.0321977		Avg Stain 2 Cytoplasmic OD	0.0324852		Avg Stain 2 Cytoplasmic OD	0.0325188		Avg Stain 2 Cytoplasmic OD	0.032598		Avg Stain 2 Cytoplasmic OD	0.0322554		Avg Stain 2 Cytoplasmic OD	0.0323099		Avg Stain 2 Cytoplasmic OD	0.0323984
		Avg Cell Area (µm²)	113.032		Avg Cell Area (µm²)	107.087		Avg Cell Area (µm²)	107.949		Avg Cell Area (µm²)	107.656		Avg Cell Area (µm²)	103.618		Avg Cell Area (µm²)	108.094		Avg Cell Area (µm²)	80.5497		Avg Cell Area (µm²)	93.9792
		Avg Cytoplasm Area (µm²)	74.672		Avg Cytoplasm Area (µm²)	74.2888		Avg Cytoplasm Area (µm²)	72.7688		Avg Cytoplasm Area (µm²)	74.1792		Avg Cytoplasm Area (µm²)	71.3299		Avg Cytoplasm Area (µm²)	71.8539		Avg Cytoplasm Area (µm²)	53.8241		Avg Cytoplasm Area (µm²)	65.045
		Avg Nucleus Area (µm²)	38.3601		Avg Nucleus Area (µm²)	32.7983		Avg Nucleus Area (µm²)	35.1805		Avg Nucleus Area (µm²)	33.477		Avg Nucleus Area (µm²)	32.2881		Avg Nucleus Area (µm²)	36.2402		Avg Nucleus Area (µm²)	26.7255		Avg Nucleus Area (µm²)	28.9342
		Avg Nucleus Perimeter (µm)	14.9024		Avg Nucleus Perimeter (µm)	12.8009		Avg Nucleus Perimeter (µm)	13.7776		Avg Nucleus Perimeter (µm)	13.0839		Avg Nucleus Perimeter (µm)	12.7155		Avg Nucleus Perimeter (µm)	14.1544		Avg Nucleus Perimeter (µm)	10.6053		Avg Nucleus Perimeter (µm)	11.4666
		Avg Nucleus Roundness	0.678494		Avg Nucleus Roundness	0.683456		Avg Nucleus Roundness	0.678289		Avg Nucleus Roundness	0.682826		Avg Nucleus Roundness	0.678436		Avg Nucleus Roundness	0.67677		Avg Nucleus Roundness	0.668901		Avg Nucleus Roundness	0.67401
		Tissue Area (µm²)	620739		Tissue Area (µm²)	733960		Tissue Area (µm²)	792544		Tissue Area (µm²)	1326240		Tissue Area (µm²)	644711		Tissue Area (µm²)	597557		Tissue Area (µm²)	663276		Tissue Area (µm²)	1029220
		Tumor: Total Cells	2909		Tumor: Total Cells	3351		Tumor: Total Cells	3641		Tumor: Total Cells	6059		Tumor: Total Cells	3115		Tumor: Total Cells	2887		Tumor: Total Cells	4289		Tumor: Total Cells	5557
		Tumor: Stain 1 Positive Cells	126		Tumor: Stain 1 Positive Cells	83		Tumor: Stain 1 Positive Cells	67		Tumor: Stain 1 Positive Cells	138		Tumor: Stain 1 Positive Cells	54		Tumor: Stain 1 Positive Cells	57		Tumor: Stain 1 Positive Cells	12		Tumor: Stain 1 Positive Cells	73
		Tumor: Stain 1 0+ Cells	2783		Tumor: Stain 1 0+ Cells	3268		Tumor: Stain 1 0+ Cells	3574		Tumor: Stain 1 0+ Cells	5921		Tumor: Stain 1 0+ Cells	3061		Tumor: Stain 1 0+ Cells	2830		Tumor: Stain 1 0+ Cells	4277		Tumor: Stain 1 0+ Cells	5484
		Tumor: Stain 1 1+ Cells	70		Tumor: Stain 1 1+ Cells	54		Tumor: Stain 1 1+ Cells	33		Tumor: Stain 1 1+ Cells	66		Tumor: Stain 1 1+ Cells	26		Tumor: Stain 1 1+ Cells	31		Tumor: Stain 1 1+ Cells	6		Tumor: Stain 1 1+ Cells	30
		Tumor: Stain 1 2+ Cells	35		Tumor: Stain 1 2+ Cells	13		Tumor: Stain 1 2+ Cells	19		Tumor: Stain 1 2+ Cells	33		Tumor: Stain 1 2+ Cells	20		Tumor: Stain 1 2+ Cells	16		Tumor: Stain 1 2+ Cells	5		Tumor: Stain 1 2+ Cells	22
		Tumor: Stain 1 3+ Cells	21		Tumor: Stain 1 3+ Cells	16		Tumor: Stain 1 3+ Cells	15		Tumor: Stain 1 3+ Cells	39		Tumor: Stain 1 3+ Cells	8		Tumor: Stain 1 3+ Cells	10		Tumor: Stain 1 3+ Cells	1		Tumor: Stain 1 3+ Cells	21
		Tumor: Stain 2 Positive Cells	0		Tumor: Stain 2 Positive Cells	0		Tumor: Stain 2 Positive Cells	0		Tumor: Stain 2 Positive Cells	0		Tumor: Stain 2 Positive Cells	0		Tumor: Stain 2 Positive Cells	0		Tumor: Stain 2 Positive Cells	0		Tumor: Stain 2 Positive Cells	0
		Tumor: Stain 2 0+ Cells	2909		Tumor: Stain 2 0+ Cells	3351		Tumor: Stain 2 0+ Cells	3641		Tumor: Stain 2 0+ Cells	6059		Tumor: Stain 2 0+ Cells	3115		Tumor: Stain 2 0+ Cells	2887		Tumor: Stain 2 0+ Cells	4289		Tumor: Stain 2 0+ Cells	5557
		Tumor: Stain 2 1+ Cells	0		Tumor: Stain 2 1+ Cells	0		Tumor: Stain 2 1+ Cells	0		Tumor: Stain 2 1+ Cells	0		Tumor: Stain 2 1+ Cells	0		Tumor: Stain 2 1+ Cells	0		Tumor: Stain 2 1+ Cells	0		Tumor: Stain 2 1+ Cells	0
		Tumor: Stain 2 2+ Cells	0		Tumor: Stain 2 2+ Cells	0		Tumor: Stain 2 2+ Cells	0		Tumor: Stain 2 2+ Cells	0		Tumor: Stain 2 2+ Cells	0		Tumor: Stain 2 2+ Cells	0		Tumor: Stain 2 2+ Cells	0		Tumor: Stain 2 2+ Cells	0
		Tumor: Stain 2 3+ Cells	0		Tumor: Stain 2 3+ Cells	0		Tumor: Stain 2 3+ Cells	0		Tumor: Stain 2 3+ Cells	0		Tumor: Stain 2 3+ Cells	0		Tumor: Stain 2 3+ Cells	0		Tumor: Stain 2 3+ Cells	0		Tumor: Stain 2 3+ Cells	0
		Tumor: Dual Positive Cells	0		Tumor: Dual Positive Cells	0		Tumor: Dual Positive Cells	0		Tumor: Dual Positive Cells	0		Tumor: Dual Positive Cells	0		Tumor: Dual Positive Cells	0		Tumor: Dual Positive Cells	0		Tumor: Dual Positive Cells	0
		Tumor: Dual Negative Cells	2783		Tumor: Dual Negative Cells	3268		Tumor: Dual Negative Cells	3574		Tumor: Dual Negative Cells	5921		Tumor: Dual Negative Cells	3061		Tumor: Dual Negative Cells	2830		Tumor: Dual Negative Cells	4277		Tumor: Dual Negative Cells	5484
		Tumor: % Stain 1 Positive Cells	4.33139		Tumor: % Stain 1 Positive Cells	2.47687		Tumor: % Stain 1 Positive Cells	1.84015		Tumor: % Stain 1 Positive Cells	2.2776		Tumor: % Stain 1 Positive Cells	1.73355		Tumor: % Stain 1 Positive Cells	1.97437		Tumor: % Stain 1 Positive Cells	0.279785		Tumor: % Stain 1 Positive Cells	1.31366		2.02842
		Tumor: % Stain 1 0+ Cells	95.6686		Tumor: % Stain 1 0+ Cells	97.5231		Tumor: % Stain 1 0+ Cells	98.1598		Tumor: % Stain 1 0+ Cells	97.7224		Tumor: % Stain 1 0+ Cells	98.2665		Tumor: % Stain 1 0+ Cells	98.0256		Tumor: % Stain 1 0+ Cells	99.7202		Tumor: % Stain 1 0+ Cells	98.6863
		Tumor: % Stain 1 1+ Cells	2.40633		Tumor: % Stain 1 1+ Cells	1.61146		Tumor: % Stain 1 1+ Cells	0.906344		Tumor: % Stain 1 1+ Cells	1.08929		Tumor: % Stain 1 1+ Cells	0.834671		Tumor: % Stain 1 1+ Cells	1.07378		Tumor: % Stain 1 1+ Cells	0.139893		Tumor: % Stain 1 1+ Cells	0.53986
		Tumor: % Stain 1 2+ Cells	1.20316		Tumor: % Stain 1 2+ Cells	0.387944		Tumor: % Stain 1 2+ Cells	0.521835		Tumor: % Stain 1 2+ Cells	0.544644		Tumor: % Stain 1 2+ Cells	0.642055		Tumor: % Stain 1 2+ Cells	0.554209		Tumor: % Stain 1 2+ Cells	0.116577		Tumor: % Stain 1 2+ Cells	0.395897
		Tumor: % Stain 1 3+ Cells	0.721898		Tumor: % Stain 1 3+ Cells	0.477469		Tumor: % Stain 1 3+ Cells	0.411975		Tumor: % Stain 1 3+ Cells	0.643671		Tumor: % Stain 1 3+ Cells	0.256822		Tumor: % Stain 1 3+ Cells	0.34638		Tumor: % Stain 1 3+ Cells	0.0233155		Tumor: % Stain 1 3+ Cells	0.377902
		Tumor: Stain 1 H-Score	6.97834		Tumor: Stain 1 H-Score	3.81976		Tumor: Stain 1 H-Score	3.18594		Tumor: Stain 1 H-Score	4.10959		Tumor: Stain 1 H-Score	2.88925		Tumor: Stain 1 H-Score	3.22134		Tumor: Stain 1 H-Score	0.442994		Tumor: Stain 1 H-Score	2.46536
		Tumor: % Stain 2 Positive Cells	0		Tumor: % Stain 2 Positive Cells	0		Tumor: % Stain 2 Positive Cells	0		Tumor: % Stain 2 Positive Cells	0		Tumor: % Stain 2 Positive Cells	0		Tumor: % Stain 2 Positive Cells	0		Tumor: % Stain 2 Positive Cells	0		Tumor: % Stain 2 Positive Cells	0
		Tumor: % Stain 2 0+ Cells	100		Tumor: % Stain 2 0+ Cells	100		Tumor: % Stain 2 0+ Cells	100		Tumor: % Stain 2 0+ Cells	100		Tumor: % Stain 2 0+ Cells	100		Tumor: % Stain 2 0+ Cells	100		Tumor: % Stain 2 0+ Cells	100		Tumor: % Stain 2 0+ Cells	100
		Tumor: % Stain 2 1+ Cells	0		Tumor: % Stain 2 1+ Cells	0		Tumor: % Stain 2 1+ Cells	0		Tumor: % Stain 2 1+ Cells	0		Tumor: % Stain 2 1+ Cells	0		Tumor: % Stain 2 1+ Cells	0		Tumor: % Stain 2 1+ Cells	0		Tumor: % Stain 2 1+ Cells	0
		Tumor: % Stain 2 2+ Cells	0		Tumor: % Stain 2 2+ Cells	0		Tumor: % Stain 2 2+ Cells	0		Tumor: % Stain 2 2+ Cells	0		Tumor: % Stain 2 2+ Cells	0		Tumor: % Stain 2 2+ Cells	0		Tumor: % Stain 2 2+ Cells	0		Tumor: % Stain 2 2+ Cells	0
		Tumor: % Stain 2 3+ Cells	0		Tumor: % Stain 2 3+ Cells	0		Tumor: % Stain 2 3+ Cells	0		Tumor: % Stain 2 3+ Cells	0		Tumor: % Stain 2 3+ Cells	0		Tumor: % Stain 2 3+ Cells	0		Tumor: % Stain 2 3+ Cells	0		Tumor: % Stain 2 3+ Cells	0
		Tumor: Stain 2 H-Score	0		Tumor: Stain 2 H-Score	0		Tumor: Stain 2 H-Score	0		Tumor: Stain 2 H-Score	0		Tumor: Stain 2 H-Score	0		Tumor: Stain 2 H-Score	0		Tumor: Stain 2 H-Score	0		Tumor: Stain 2 H-Score	0
		Tumor: % Dual Positive Cells	0		Tumor: % Dual Positive Cells	0		Tumor: % Dual Positive Cells	0		Tumor: % Dual Positive Cells	0		Tumor: % Dual Positive Cells	0		Tumor: % Dual Positive Cells	0		Tumor: % Dual Positive Cells	0		Tumor: % Dual Positive Cells	0
		Tumor: % Dual Negative Cells	95.6686		Tumor: % Dual Negative Cells	97.5231		Tumor: % Dual Negative Cells	98.1598		Tumor: % Dual Negative Cells	97.7224		Tumor: % Dual Negative Cells	98.2665		Tumor: % Dual Negative Cells	98.0256		Tumor: % Dual Negative Cells	99.7202		Tumor: % Dual Negative Cells	98.6863
		Tumor: Avg Stain 1 Nuclear OD	0.0533577		Tumor: Avg Stain 1 Nuclear OD	0.0425728		Tumor: Avg Stain 1 Nuclear OD	0.0376587		Tumor: Avg Stain 1 Nuclear OD	0.0413745		Tumor: Avg Stain 1 Nuclear OD	0.0370837		Tumor: Avg Stain 1 Nuclear OD	0.0389427		Tumor: Avg Stain 1 Nuclear OD	0.0305281		Tumor: Avg Stain 1 Nuclear OD	0.0360963
		Tumor: Avg Stain 2 Nuclear OD	0.0378715		Tumor: Avg Stain 2 Nuclear OD	0.0374233		Tumor: Avg Stain 2 Nuclear OD	0.0376957		Tumor: Avg Stain 2 Nuclear OD	0.0379088		Tumor: Avg Stain 2 Nuclear OD	0.0372956		Tumor: Avg Stain 2 Nuclear OD	0.0377621		Tumor: Avg Stain 2 Nuclear OD	0.0361034		Tumor: Avg Stain 2 Nuclear OD	0.0374001
		Tumor: Avg Stain 1 Cytoplasmic OD	0.0345232		Tumor: Avg Stain 1 Cytoplasmic OD	0.0318931		Tumor: Avg Stain 1 Cytoplasmic OD	0.0306702		Tumor: Avg Stain 1 Cytoplasmic OD	0.0312259		Tumor: Avg Stain 1 Cytoplasmic OD	0.0303446		Tumor: Avg Stain 1 Cytoplasmic OD	0.0312532		Tumor: Avg Stain 1 Cytoplasmic OD	0.030275		Tumor: Avg Stain 1 Cytoplasmic OD	0.0305442
		Tumor: Avg Stain 2 Cytoplasmic OD	0.032422		Tumor: Avg Stain 2 Cytoplasmic OD	0.0321977		Tumor: Avg Stain 2 Cytoplasmic OD	0.0324852		Tumor: Avg Stain 2 Cytoplasmic OD	0.0325188		Tumor: Avg Stain 2 Cytoplasmic OD	0.032598		Tumor: Avg Stain 2 Cytoplasmic OD	0.0322554		Tumor: Avg Stain 2 Cytoplasmic OD	0.0323099		Tumor: Avg Stain 2 Cytoplasmic OD	0.0323984
		Tumor: Avg Cell Area (µm²)	113.032		Tumor: Avg Cell Area (µm²)	107.087		Tumor: Avg Cell Area (µm²)	107.949		Tumor: Avg Cell Area (µm²)	107.656		Tumor: Avg Cell Area (µm²)	103.618		Tumor: Avg Cell Area (µm²)	108.094		Tumor: Avg Cell Area (µm²)	80.5497		Tumor: Avg Cell Area (µm²)	93.9792
		Tumor: Avg Cytoplasm Area (µm²)	74.672		Tumor: Avg Cytoplasm Area (µm²)	74.2888		Tumor: Avg Cytoplasm Area (µm²)	72.7688		Tumor: Avg Cytoplasm Area (µm²)	74.1792		Tumor: Avg Cytoplasm Area (µm²)	71.3299		Tumor: Avg Cytoplasm Area (µm²)	71.8539		Tumor: Avg Cytoplasm Area (µm²)	53.8241		Tumor: Avg Cytoplasm Area (µm²)	65.045
		Tumor: Avg Nucleus Area (µm²)	38.3601		Tumor: Avg Nucleus Area (µm²)	32.7983		Tumor: Avg Nucleus Area (µm²)	35.1805		Tumor: Avg Nucleus Area (µm²)	33.477		Tumor: Avg Nucleus Area (µm²)	32.2881		Tumor: Avg Nucleus Area (µm²)	36.2402		Tumor: Avg Nucleus Area (µm²)	26.7255		Tumor: Avg Nucleus Area (µm²)	28.9342
		Tumor: Avg Nucleus Perimeter (µm)	14.9024		Tumor: Avg Nucleus Perimeter (µm)	12.8009		Tumor: Avg Nucleus Perimeter (µm)	13.7776		Tumor: Avg Nucleus Perimeter (µm)	13.0839		Tumor: Avg Nucleus Perimeter (µm)	12.7155		Tumor: Avg Nucleus Perimeter (µm)	14.1544		Tumor: Avg Nucleus Perimeter (µm)	10.6053		Tumor: Avg Nucleus Perimeter (µm)	11.4666
		Tumor: Avg Nucleus Roundness	0.678494		Tumor: Avg Nucleus Roundness	0.683456		Tumor: Avg Nucleus Roundness	0.678289		Tumor: Avg Nucleus Roundness	0.682826		Tumor: Avg Nucleus Roundness	0.678436		Tumor: Avg Nucleus Roundness	0.67677		Tumor: Avg Nucleus Roundness	0.668901		Tumor: Avg Nucleus Roundness	0.67401
		Tumor: Tissue Area (µm²)	620739		Tumor: Tissue Area (µm²)	733960		Tumor: Tissue Area (µm²)	792544		Tumor: Tissue Area (µm²)	1326240		Tumor: Tissue Area (µm²)	644711		Tumor: Tissue Area (µm²)	597557		Tumor: Tissue Area (µm²)	663276		Tumor: Tissue Area (µm²)	1029220
		BSNA19.1b	HOM
		Name	Value		Name	Value		Name	Value		Name	Value		Name	Value		Name	Value		Name	Value		Name	Value
		Classified Area (mm²)	1.4443		Classified Area (mm²)	0.91976		Classified Area (mm²)	0.93524		Classified Area (mm²)	0.70581		Classified Area (mm²)	0.65696		Classified Area (mm²)	0.58268		Classified Area (mm²)	0.57763		Classified Area (mm²)	0.4208
		Tumor Area (mm²)	1.42271		Tumor Area (mm²)	0.91436		Tumor Area (mm²)	0.92708		Tumor Area (mm²)	0.66121		Tumor Area (mm²)	0.63915		Tumor Area (mm²)	0.58071		Tumor Area (mm²)	0.55299		Tumor Area (mm²)	0.41207
		Necrosis Area (mm²)	0.00025		Necrosis Area (mm²)	0		Necrosis Area (mm²)	0		Necrosis Area (mm²)	0		Necrosis Area (mm²)	0		Necrosis Area (mm²)	0.00013		Necrosis Area (mm²)	0.00236		Necrosis Area (mm²)	0.00011
		Empty Area (mm²)	0.00634		Empty Area (mm²)	0.0015		Empty Area (mm²)	0.00189		Empty Area (mm²)	0.03993		Empty Area (mm²)	0.01645		Empty Area (mm²)	0.0014		Empty Area (mm²)	0.00444		Empty Area (mm²)	0.00278
		Normal Area (mm²)	0.015		Normal Area (mm²)	0.00391		Normal Area (mm²)	0.00627		Normal Area (mm²)	0.00467		Normal Area (mm²)	0.00136		Normal Area (mm²)	0.00045		Normal Area (mm²)	0.01784		Normal Area (mm²)	0.00584
		Total Cells	6346		Total Cells	4592		Total Cells	4265		Total Cells	2391		Total Cells	2682		Total Cells	2491		Total Cells	2715		Total Cells	1923
		Stain 1 Positive Cells	62		Stain 1 Positive Cells	45		Stain 1 Positive Cells	39		Stain 1 Positive Cells	14		Stain 1 Positive Cells	13		Stain 1 Positive Cells	2		Stain 1 Positive Cells	26		Stain 1 Positive Cells	12
		Stain 1 0+ Cells	6284		Stain 1 0+ Cells	4547		Stain 1 0+ Cells	4226		Stain 1 0+ Cells	2377		Stain 1 0+ Cells	2669		Stain 1 0+ Cells	2489		Stain 1 0+ Cells	2689		Stain 1 0+ Cells	1911
		Stain 1 1+ Cells	39		Stain 1 1+ Cells	24		Stain 1 1+ Cells	23		Stain 1 1+ Cells	7		Stain 1 1+ Cells	9		Stain 1 1+ Cells	1		Stain 1 1+ Cells	15		Stain 1 1+ Cells	3
		Stain 1 2+ Cells	15		Stain 1 2+ Cells	16		Stain 1 2+ Cells	13		Stain 1 2+ Cells	5		Stain 1 2+ Cells	3		Stain 1 2+ Cells	0		Stain 1 2+ Cells	5		Stain 1 2+ Cells	6
		Stain 1 3+ Cells	8		Stain 1 3+ Cells	5		Stain 1 3+ Cells	3		Stain 1 3+ Cells	2		Stain 1 3+ Cells	1		Stain 1 3+ Cells	1		Stain 1 3+ Cells	6		Stain 1 3+ Cells	3
		Stain 2 Positive Cells	0		Stain 2 Positive Cells	0		Stain 2 Positive Cells	0		Stain 2 Positive Cells	0		Stain 2 Positive Cells	0		Stain 2 Positive Cells	0		Stain 2 Positive Cells	0		Stain 2 Positive Cells	0
		Stain 2 0+ Cells	6346		Stain 2 0+ Cells	4592		Stain 2 0+ Cells	4265		Stain 2 0+ Cells	2391		Stain 2 0+ Cells	2682		Stain 2 0+ Cells	2491		Stain 2 0+ Cells	2715		Stain 2 0+ Cells	1923
		Stain 2 1+ Cells	0		Stain 2 1+ Cells	0		Stain 2 1+ Cells	0		Stain 2 1+ Cells	0		Stain 2 1+ Cells	0		Stain 2 1+ Cells	0		Stain 2 1+ Cells	0		Stain 2 1+ Cells	0
		Stain 2 2+ Cells	0		Stain 2 2+ Cells	0		Stain 2 2+ Cells	0		Stain 2 2+ Cells	0		Stain 2 2+ Cells	0		Stain 2 2+ Cells	0		Stain 2 2+ Cells	0		Stain 2 2+ Cells	0
		Stain 2 3+ Cells	0		Stain 2 3+ Cells	0		Stain 2 3+ Cells	0		Stain 2 3+ Cells	0		Stain 2 3+ Cells	0		Stain 2 3+ Cells	0		Stain 2 3+ Cells	0		Stain 2 3+ Cells	0
		Dual Positive Cells	0		Dual Positive Cells	0		Dual Positive Cells	0		Dual Positive Cells	0		Dual Positive Cells	0		Dual Positive Cells	0		Dual Positive Cells	0		Dual Positive Cells	0
		Dual Negative Cells	6284		Dual Negative Cells	4547		Dual Negative Cells	4226		Dual Negative Cells	2377		Dual Negative Cells	2669		Dual Negative Cells	2489		Dual Negative Cells	2689		Dual Negative Cells	1911
		% Stain 1 Positive Cells	0.976993		% Stain 1 Positive Cells	0.979965		% Stain 1 Positive Cells	0.91442		% Stain 1 Positive Cells	0.585529		% Stain 1 Positive Cells	0.484713		% Stain 1 Positive Cells	0.080289		% Stain 1 Positive Cells	0.957643		% Stain 1 Positive Cells	0.624025
		% Stain 1 0+ Cells	99.023		% Stain 1 0+ Cells	99.02		% Stain 1 0+ Cells	99.0856		% Stain 1 0+ Cells	99.4145		% Stain 1 0+ Cells	99.5153		% Stain 1 0+ Cells	99.9197		% Stain 1 0+ Cells	99.0424		% Stain 1 0+ Cells	99.376
		% Stain 1 1+ Cells	0.61456		% Stain 1 1+ Cells	0.522648		% Stain 1 1+ Cells	0.539273		% Stain 1 1+ Cells	0.292765		% Stain 1 1+ Cells	0.33557		% Stain 1 1+ Cells	0.0401445		% Stain 1 1+ Cells	0.552486		% Stain 1 1+ Cells	0.156006
		% Stain 1 2+ Cells	0.236369		% Stain 1 2+ Cells	0.348432		% Stain 1 2+ Cells	0.304807		% Stain 1 2+ Cells	0.209118		% Stain 1 2+ Cells	0.111857		% Stain 1 2+ Cells	0		% Stain 1 2+ Cells	0.184162		% Stain 1 2+ Cells	0.312012
		% Stain 1 3+ Cells	0.126064		% Stain 1 3+ Cells	0.108885		% Stain 1 3+ Cells	0.07034		% Stain 1 3+ Cells	0.083647		% Stain 1 3+ Cells	0.0372856		% Stain 1 3+ Cells	0.0401445		% Stain 1 3+ Cells	0.220994		% Stain 1 3+ Cells	0.156006
		Stain 1 H-Score	1.46549		Stain 1 H-Score	1.54617		Stain 1 H-Score	1.35991		Stain 1 H-Score	0.961941		Stain 1 H-Score	0.671141		Stain 1 H-Score	0.160578		Stain 1 H-Score	1.58379		Stain 1 H-Score	1.24805
		% Stain 2 Positive Cells	0		% Stain 2 Positive Cells	0		% Stain 2 Positive Cells	0		% Stain 2 Positive Cells	0		% Stain 2 Positive Cells	0		% Stain 2 Positive Cells	0		% Stain 2 Positive Cells	0		% Stain 2 Positive Cells	0
		% Stain 2 0+ Cells	100		% Stain 2 0+ Cells	100		% Stain 2 0+ Cells	100		% Stain 2 0+ Cells	100		% Stain 2 0+ Cells	100		% Stain 2 0+ Cells	100		% Stain 2 0+ Cells	100		% Stain 2 0+ Cells	100
		% Stain 2 1+ Cells	0		% Stain 2 1+ Cells	0		% Stain 2 1+ Cells	0		% Stain 2 1+ Cells	0		% Stain 2 1+ Cells	0		% Stain 2 1+ Cells	0		% Stain 2 1+ Cells	0		% Stain 2 1+ Cells	0
		% Stain 2 2+ Cells	0		% Stain 2 2+ Cells	0		% Stain 2 2+ Cells	0		% Stain 2 2+ Cells	0		% Stain 2 2+ Cells	0		% Stain 2 2+ Cells	0		% Stain 2 2+ Cells	0		% Stain 2 2+ Cells	0
		% Stain 2 3+ Cells	0		% Stain 2 3+ Cells	0		% Stain 2 3+ Cells	0		% Stain 2 3+ Cells	0		% Stain 2 3+ Cells	0		% Stain 2 3+ Cells	0		% Stain 2 3+ Cells	0		% Stain 2 3+ Cells	0
		Stain 2 H-Score	0		Stain 2 H-Score	0		Stain 2 H-Score	0		Stain 2 H-Score	0		Stain 2 H-Score	0		Stain 2 H-Score	0		Stain 2 H-Score	0		Stain 2 H-Score	0
		% Dual Positive Cells	0		% Dual Positive Cells	0		% Dual Positive Cells	0		% Dual Positive Cells	0		% Dual Positive Cells	0		% Dual Positive Cells	0		% Dual Positive Cells	0		% Dual Positive Cells	0
		% Dual Negative Cells	99.023		% Dual Negative Cells	99.02		% Dual Negative Cells	99.0856		% Dual Negative Cells	99.4145		% Dual Negative Cells	99.5153		% Dual Negative Cells	99.9197		% Dual Negative Cells	99.0424		% Dual Negative Cells	99.376
		Avg Stain 1 Nuclear OD	0.0326003		Avg Stain 1 Nuclear OD	0.0329237		Avg Stain 1 Nuclear OD	0.0321483		Avg Stain 1 Nuclear OD	0.0299623		Avg Stain 1 Nuclear OD	0.030285		Avg Stain 1 Nuclear OD	0.0283279		Avg Stain 1 Nuclear OD	0.034983		Avg Stain 1 Nuclear OD	0.0320389
		Avg Stain 2 Nuclear OD	0.0367132		Avg Stain 2 Nuclear OD	0.0370577		Avg Stain 2 Nuclear OD	0.0374529		Avg Stain 2 Nuclear OD	0.0372522		Avg Stain 2 Nuclear OD	0.0370589		Avg Stain 2 Nuclear OD	0.0373014		Avg Stain 2 Nuclear OD	0.0350456		Avg Stain 2 Nuclear OD	0.0367691
		Avg Stain 1 Cytoplasmic OD	0.0296686		Avg Stain 1 Cytoplasmic OD	0.0298323		Avg Stain 1 Cytoplasmic OD	0.0294946		Avg Stain 1 Cytoplasmic OD	0.0294269		Avg Stain 1 Cytoplasmic OD	0.0292104		Avg Stain 1 Cytoplasmic OD	0.0287324		Avg Stain 1 Cytoplasmic OD	0.0311429		Avg Stain 1 Cytoplasmic OD	0.0301603
		Avg Stain 2 Cytoplasmic OD	0.0323697		Avg Stain 2 Cytoplasmic OD	0.03225		Avg Stain 2 Cytoplasmic OD	0.0325796		Avg Stain 2 Cytoplasmic OD	0.0325754		Avg Stain 2 Cytoplasmic OD	0.0324799		Avg Stain 2 Cytoplasmic OD	0.0326115		Avg Stain 2 Cytoplasmic OD	0.0316825		Avg Stain 2 Cytoplasmic OD	0.032401
		Avg Cell Area (µm²)	93.3125		Avg Cell Area (µm²)	92.1221		Avg Cell Area (µm²)	95.6332		Avg Cell Area (µm²)	83.7861		Avg Cell Area (µm²)	85.6028		Avg Cell Area (µm²)	84.7519		Avg Cell Area (µm²)	82.4423		Avg Cell Area (µm²)	82.5996
		Avg Cytoplasm Area (µm²)	61.7442		Avg Cytoplasm Area (µm²)	60.299		Avg Cytoplasm Area (µm²)	62.7836		Avg Cytoplasm Area (µm²)	56.5223		Avg Cytoplasm Area (µm²)	55.6535		Avg Cytoplasm Area (µm²)	56.3049		Avg Cytoplasm Area (µm²)	56.1256		Avg Cytoplasm Area (µm²)	55.585
		Avg Nucleus Area (µm²)	31.5683		Avg Nucleus Area (µm²)	31.8231		Avg Nucleus Area (µm²)	32.8496		Avg Nucleus Area (µm²)	27.2638		Avg Nucleus Area (µm²)	29.9493		Avg Nucleus Area (µm²)	28.447		Avg Nucleus Area (µm²)	26.3167		Avg Nucleus Area (µm²)	27.0146
		Avg Nucleus Perimeter (µm)	12.5049		Avg Nucleus Perimeter (µm)	12.6139		Avg Nucleus Perimeter (µm)	12.9772		Avg Nucleus Perimeter (µm)	10.8258		Avg Nucleus Perimeter (µm)	11.8858		Avg Nucleus Perimeter (µm)	11.2948		Avg Nucleus Perimeter (µm)	10.4518		Avg Nucleus Perimeter (µm)	10.7244
		Avg Nucleus Roundness	0.673466		Avg Nucleus Roundness	0.669902		Avg Nucleus Roundness	0.670916		Avg Nucleus Roundness	0.66902		Avg Nucleus Roundness	0.668832		Avg Nucleus Roundness	0.662537		Avg Nucleus Roundness	0.669884		Avg Nucleus Roundness	0.669049
		Tissue Area (µm²)	1104710		Tissue Area (µm²)	802943		Tissue Area (µm²)	766953		Tissue Area (µm²)	376718		Tissue Area (µm²)	409957		Tissue Area (µm²)	392442		Tissue Area (µm²)	430628		Tissue Area (µm²)	294749
		Tumor: Total Cells	6346		Tumor: Total Cells	4592		Tumor: Total Cells	4265		Tumor: Total Cells	2391		Tumor: Total Cells	2682		Tumor: Total Cells	2491		Tumor: Total Cells	2715		Tumor: Total Cells	1923
		Tumor: Stain 1 Positive Cells	62		Tumor: Stain 1 Positive Cells	45		Tumor: Stain 1 Positive Cells	39		Tumor: Stain 1 Positive Cells	14		Tumor: Stain 1 Positive Cells	13		Tumor: Stain 1 Positive Cells	2		Tumor: Stain 1 Positive Cells	26		Tumor: Stain 1 Positive Cells	12
		Tumor: Stain 1 0+ Cells	6284		Tumor: Stain 1 0+ Cells	4547		Tumor: Stain 1 0+ Cells	4226		Tumor: Stain 1 0+ Cells	2377		Tumor: Stain 1 0+ Cells	2669		Tumor: Stain 1 0+ Cells	2489		Tumor: Stain 1 0+ Cells	2689		Tumor: Stain 1 0+ Cells	1911
		Tumor: Stain 1 1+ Cells	39		Tumor: Stain 1 1+ Cells	24		Tumor: Stain 1 1+ Cells	23		Tumor: Stain 1 1+ Cells	7		Tumor: Stain 1 1+ Cells	9		Tumor: Stain 1 1+ Cells	1		Tumor: Stain 1 1+ Cells	15		Tumor: Stain 1 1+ Cells	3
		Tumor: Stain 1 2+ Cells	15		Tumor: Stain 1 2+ Cells	16		Tumor: Stain 1 2+ Cells	13		Tumor: Stain 1 2+ Cells	5		Tumor: Stain 1 2+ Cells	3		Tumor: Stain 1 2+ Cells	0		Tumor: Stain 1 2+ Cells	5		Tumor: Stain 1 2+ Cells	6
		Tumor: Stain 1 3+ Cells	8		Tumor: Stain 1 3+ Cells	5		Tumor: Stain 1 3+ Cells	3		Tumor: Stain 1 3+ Cells	2		Tumor: Stain 1 3+ Cells	1		Tumor: Stain 1 3+ Cells	1		Tumor: Stain 1 3+ Cells	6		Tumor: Stain 1 3+ Cells	3
		Tumor: Stain 2 Positive Cells	0		Tumor: Stain 2 Positive Cells	0		Tumor: Stain 2 Positive Cells	0		Tumor: Stain 2 Positive Cells	0		Tumor: Stain 2 Positive Cells	0		Tumor: Stain 2 Positive Cells	0		Tumor: Stain 2 Positive Cells	0		Tumor: Stain 2 Positive Cells	0
		Tumor: Stain 2 0+ Cells	6346		Tumor: Stain 2 0+ Cells	4592		Tumor: Stain 2 0+ Cells	4265		Tumor: Stain 2 0+ Cells	2391		Tumor: Stain 2 0+ Cells	2682		Tumor: Stain 2 0+ Cells	2491		Tumor: Stain 2 0+ Cells	2715		Tumor: Stain 2 0+ Cells	1923
		Tumor: Stain 2 1+ Cells	0		Tumor: Stain 2 1+ Cells	0		Tumor: Stain 2 1+ Cells	0		Tumor: Stain 2 1+ Cells	0		Tumor: Stain 2 1+ Cells	0		Tumor: Stain 2 1+ Cells	0		Tumor: Stain 2 1+ Cells	0		Tumor: Stain 2 1+ Cells	0
		Tumor: Stain 2 2+ Cells	0		Tumor: Stain 2 2+ Cells	0		Tumor: Stain 2 2+ Cells	0		Tumor: Stain 2 2+ Cells	0		Tumor: Stain 2 2+ Cells	0		Tumor: Stain 2 2+ Cells	0		Tumor: Stain 2 2+ Cells	0		Tumor: Stain 2 2+ Cells	0
		Tumor: Stain 2 3+ Cells	0		Tumor: Stain 2 3+ Cells	0		Tumor: Stain 2 3+ Cells	0		Tumor: Stain 2 3+ Cells	0		Tumor: Stain 2 3+ Cells	0		Tumor: Stain 2 3+ Cells	0		Tumor: Stain 2 3+ Cells	0		Tumor: Stain 2 3+ Cells	0
		Tumor: Dual Positive Cells	0		Tumor: Dual Positive Cells	0		Tumor: Dual Positive Cells	0		Tumor: Dual Positive Cells	0		Tumor: Dual Positive Cells	0		Tumor: Dual Positive Cells	0		Tumor: Dual Positive Cells	0		Tumor: Dual Positive Cells	0
		Tumor: Dual Negative Cells	6284		Tumor: Dual Negative Cells	4547		Tumor: Dual Negative Cells	4226		Tumor: Dual Negative Cells	2377		Tumor: Dual Negative Cells	2669		Tumor: Dual Negative Cells	2489		Tumor: Dual Negative Cells	2689		Tumor: Dual Negative Cells	1911
		Tumor: % Stain 1 Positive Cells	0.976993		Tumor: % Stain 1 Positive Cells	0.979965		Tumor: % Stain 1 Positive Cells	0.91442		Tumor: % Stain 1 Positive Cells	0.585529		Tumor: % Stain 1 Positive Cells	0.484713		Tumor: % Stain 1 Positive Cells	0.080289		Tumor: % Stain 1 Positive Cells	0.957643		Tumor: % Stain 1 Positive Cells	0.624025		0.700447
		Tumor: % Stain 1 0+ Cells	99.023		Tumor: % Stain 1 0+ Cells	99.02		Tumor: % Stain 1 0+ Cells	99.0856		Tumor: % Stain 1 0+ Cells	99.4145		Tumor: % Stain 1 0+ Cells	99.5153		Tumor: % Stain 1 0+ Cells	99.9197		Tumor: % Stain 1 0+ Cells	99.0424		Tumor: % Stain 1 0+ Cells	99.376
		Tumor: % Stain 1 1+ Cells	0.61456		Tumor: % Stain 1 1+ Cells	0.522648		Tumor: % Stain 1 1+ Cells	0.539273		Tumor: % Stain 1 1+ Cells	0.292765		Tumor: % Stain 1 1+ Cells	0.33557		Tumor: % Stain 1 1+ Cells	0.0401445		Tumor: % Stain 1 1+ Cells	0.552486		Tumor: % Stain 1 1+ Cells	0.156006
		Tumor: % Stain 1 2+ Cells	0.236369		Tumor: % Stain 1 2+ Cells	0.348432		Tumor: % Stain 1 2+ Cells	0.304807		Tumor: % Stain 1 2+ Cells	0.209118		Tumor: % Stain 1 2+ Cells	0.111857		Tumor: % Stain 1 2+ Cells	0		Tumor: % Stain 1 2+ Cells	0.184162		Tumor: % Stain 1 2+ Cells	0.312012
		Tumor: % Stain 1 3+ Cells	0.126064		Tumor: % Stain 1 3+ Cells	0.108885		Tumor: % Stain 1 3+ Cells	0.07034		Tumor: % Stain 1 3+ Cells	0.083647		Tumor: % Stain 1 3+ Cells	0.0372856		Tumor: % Stain 1 3+ Cells	0.0401445		Tumor: % Stain 1 3+ Cells	0.220994		Tumor: % Stain 1 3+ Cells	0.156006
		Tumor: Stain 1 H-Score	1.46549		Tumor: Stain 1 H-Score	1.54617		Tumor: Stain 1 H-Score	1.35991		Tumor: Stain 1 H-Score	0.961941		Tumor: Stain 1 H-Score	0.671141		Tumor: Stain 1 H-Score	0.160578		Tumor: Stain 1 H-Score	1.58379		Tumor: Stain 1 H-Score	1.24805
		Tumor: % Stain 2 Positive Cells	0		Tumor: % Stain 2 Positive Cells	0		Tumor: % Stain 2 Positive Cells	0		Tumor: % Stain 2 Positive Cells	0		Tumor: % Stain 2 Positive Cells	0		Tumor: % Stain 2 Positive Cells	0		Tumor: % Stain 2 Positive Cells	0		Tumor: % Stain 2 Positive Cells	0
		Tumor: % Stain 2 0+ Cells	100		Tumor: % Stain 2 0+ Cells	100		Tumor: % Stain 2 0+ Cells	100		Tumor: % Stain 2 0+ Cells	100		Tumor: % Stain 2 0+ Cells	100		Tumor: % Stain 2 0+ Cells	100		Tumor: % Stain 2 0+ Cells	100		Tumor: % Stain 2 0+ Cells	100
		Tumor: % Stain 2 1+ Cells	0		Tumor: % Stain 2 1+ Cells	0		Tumor: % Stain 2 1+ Cells	0		Tumor: % Stain 2 1+ Cells	0		Tumor: % Stain 2 1+ Cells	0		Tumor: % Stain 2 1+ Cells	0		Tumor: % Stain 2 1+ Cells	0		Tumor: % Stain 2 1+ Cells	0
		Tumor: % Stain 2 2+ Cells	0		Tumor: % Stain 2 2+ Cells	0		Tumor: % Stain 2 2+ Cells	0		Tumor: % Stain 2 2+ Cells	0		Tumor: % Stain 2 2+ Cells	0		Tumor: % Stain 2 2+ Cells	0		Tumor: % Stain 2 2+ Cells	0		Tumor: % Stain 2 2+ Cells	0
		Tumor: % Stain 2 3+ Cells	0		Tumor: % Stain 2 3+ Cells	0		Tumor: % Stain 2 3+ Cells	0		Tumor: % Stain 2 3+ Cells	0		Tumor: % Stain 2 3+ Cells	0		Tumor: % Stain 2 3+ Cells	0		Tumor: % Stain 2 3+ Cells	0		Tumor: % Stain 2 3+ Cells	0
		Tumor: Stain 2 H-Score	0		Tumor: Stain 2 H-Score	0		Tumor: Stain 2 H-Score	0		Tumor: Stain 2 H-Score	0		Tumor: Stain 2 H-Score	0		Tumor: Stain 2 H-Score	0		Tumor: Stain 2 H-Score	0		Tumor: Stain 2 H-Score	0
		Tumor: % Dual Positive Cells	0		Tumor: % Dual Positive Cells	0		Tumor: % Dual Positive Cells	0		Tumor: % Dual Positive Cells	0		Tumor: % Dual Positive Cells	0		Tumor: % Dual Positive Cells	0		Tumor: % Dual Positive Cells	0		Tumor: % Dual Positive Cells	0
		Tumor: % Dual Negative Cells	99.023		Tumor: % Dual Negative Cells	99.02		Tumor: % Dual Negative Cells	99.0856		Tumor: % Dual Negative Cells	99.4145		Tumor: % Dual Negative Cells	99.5153		Tumor: % Dual Negative Cells	99.9197		Tumor: % Dual Negative Cells	99.0424		Tumor: % Dual Negative Cells	99.376
		Tumor: Avg Stain 1 Nuclear OD	0.0326003		Tumor: Avg Stain 1 Nuclear OD	0.0329237		Tumor: Avg Stain 1 Nuclear OD	0.0321483		Tumor: Avg Stain 1 Nuclear OD	0.0299623		Tumor: Avg Stain 1 Nuclear OD	0.030285		Tumor: Avg Stain 1 Nuclear OD	0.0283279		Tumor: Avg Stain 1 Nuclear OD	0.034983		Tumor: Avg Stain 1 Nuclear OD	0.0320389
		Tumor: Avg Stain 2 Nuclear OD	0.0367132		Tumor: Avg Stain 2 Nuclear OD	0.0370577		Tumor: Avg Stain 2 Nuclear OD	0.0374529		Tumor: Avg Stain 2 Nuclear OD	0.0372522		Tumor: Avg Stain 2 Nuclear OD	0.0370589		Tumor: Avg Stain 2 Nuclear OD	0.0373014		Tumor: Avg Stain 2 Nuclear OD	0.0350456		Tumor: Avg Stain 2 Nuclear OD	0.0367691
		Tumor: Avg Stain 1 Cytoplasmic OD	0.0296686		Tumor: Avg Stain 1 Cytoplasmic OD	0.0298323		Tumor: Avg Stain 1 Cytoplasmic OD	0.0294946		Tumor: Avg Stain 1 Cytoplasmic OD	0.0294269		Tumor: Avg Stain 1 Cytoplasmic OD	0.0292104		Tumor: Avg Stain 1 Cytoplasmic OD	0.0287324		Tumor: Avg Stain 1 Cytoplasmic OD	0.0311429		Tumor: Avg Stain 1 Cytoplasmic OD	0.0301603
		Tumor: Avg Stain 2 Cytoplasmic OD	0.0323697		Tumor: Avg Stain 2 Cytoplasmic OD	0.03225		Tumor: Avg Stain 2 Cytoplasmic OD	0.0325796		Tumor: Avg Stain 2 Cytoplasmic OD	0.0325754		Tumor: Avg Stain 2 Cytoplasmic OD	0.0324799		Tumor: Avg Stain 2 Cytoplasmic OD	0.0326115		Tumor: Avg Stain 2 Cytoplasmic OD	0.0316825		Tumor: Avg Stain 2 Cytoplasmic OD	0.032401
		Tumor: Avg Cell Area (µm²)	93.3125		Tumor: Avg Cell Area (µm²)	92.1221		Tumor: Avg Cell Area (µm²)	95.6332		Tumor: Avg Cell Area (µm²)	83.7861		Tumor: Avg Cell Area (µm²)	85.6028		Tumor: Avg Cell Area (µm²)	84.7519		Tumor: Avg Cell Area (µm²)	82.4423		Tumor: Avg Cell Area (µm²)	82.5996
		Tumor: Avg Cytoplasm Area (µm²)	61.7442		Tumor: Avg Cytoplasm Area (µm²)	60.299		Tumor: Avg Cytoplasm Area (µm²)	62.7836		Tumor: Avg Cytoplasm Area (µm²)	56.5223		Tumor: Avg Cytoplasm Area (µm²)	55.6535		Tumor: Avg Cytoplasm Area (µm²)	56.3049		Tumor: Avg Cytoplasm Area (µm²)	56.1256		Tumor: Avg Cytoplasm Area (µm²)	55.585
		Tumor: Avg Nucleus Area (µm²)	31.5683		Tumor: Avg Nucleus Area (µm²)	31.8231		Tumor: Avg Nucleus Area (µm²)	32.8496		Tumor: Avg Nucleus Area (µm²)	27.2638		Tumor: Avg Nucleus Area (µm²)	29.9493		Tumor: Avg Nucleus Area (µm²)	28.447		Tumor: Avg Nucleus Area (µm²)	26.3167		Tumor: Avg Nucleus Area (µm²)	27.0146
		Tumor: Avg Nucleus Perimeter (µm)	12.5049		Tumor: Avg Nucleus Perimeter (µm)	12.6139		Tumor: Avg Nucleus Perimeter (µm)	12.9772		Tumor: Avg Nucleus Perimeter (µm)	10.8258		Tumor: Avg Nucleus Perimeter (µm)	11.8858		Tumor: Avg Nucleus Perimeter (µm)	11.2948		Tumor: Avg Nucleus Perimeter (µm)	10.4518		Tumor: Avg Nucleus Perimeter (µm)	10.7244
		Tumor: Avg Nucleus Roundness	0.673466		Tumor: Avg Nucleus Roundness	0.669902		Tumor: Avg Nucleus Roundness	0.670916		Tumor: Avg Nucleus Roundness	0.66902		Tumor: Avg Nucleus Roundness	0.668832		Tumor: Avg Nucleus Roundness	0.662537		Tumor: Avg Nucleus Roundness	0.669884		Tumor: Avg Nucleus Roundness	0.669049
		Tumor: Tissue Area (µm²)	1104710		Tumor: Tissue Area (µm²)	802943		Tumor: Tissue Area (µm²)	766953		Tumor: Tissue Area (µm²)	376718		Tumor: Tissue Area (µm²)	409957		Tumor: Tissue Area (µm²)	392442		Tumor: Tissue Area (µm²)	430628		Tumor: Tissue Area (µm²)	294749
		BSNA15.1a	HOM
		Name	Value		Name	Value		Name	Value		Name	Value		Name	Value		Name	Value		Name	Value		Name	Value
		Classified Area (mm²)	0.6329		Classified Area (mm²)	0.40619		Classified Area (mm²)	0.48934		Classified Area (mm²)	0.51677		Classified Area (mm²)	0.59218		Classified Area (mm²)	0.48733		Classified Area (mm²)	0.58335		Classified Area (mm²)	0.49098
		Tumor Area (mm²)	0.62194		Tumor Area (mm²)	0.37101		Tumor Area (mm²)	0.4107		Tumor Area (mm²)	0.32798		Tumor Area (mm²)	0.31788		Tumor Area (mm²)	0.34602		Tumor Area (mm²)	0.49165		Tumor Area (mm²)	0.46579
		Necrosis Area (mm²)	0		Necrosis Area (mm²)	0		Necrosis Area (mm²)	0		Necrosis Area (mm²)	0		Necrosis Area (mm²)	0		Necrosis Area (mm²)	0		Necrosis Area (mm²)	0		Necrosis Area (mm²)	0.00026
		Empty Area (mm²)	0.00067		Empty Area (mm²)	0		Empty Area (mm²)	0.00168		Empty Area (mm²)	0.00164		Empty Area (mm²)	0.00453		Empty Area (mm²)	0.00344		Empty Area (mm²)	0.02792		Empty Area (mm²)	0.0113
		Normal Area (mm²)	0.01029		Normal Area (mm²)	0.03518		Normal Area (mm²)	0.07696		Normal Area (mm²)	0.18715		Normal Area (mm²)	0.26977		Normal Area (mm²)	0.13786		Normal Area (mm²)	0.06378		Normal Area (mm²)	0.01363
		Total Cells	3476		Total Cells	2265		Total Cells	2323		Total Cells	1748		Total Cells	1653		Total Cells	1923		Total Cells	2519		Total Cells	2425
		Stain 1 Positive Cells	14		Stain 1 Positive Cells	4		Stain 1 Positive Cells	15		Stain 1 Positive Cells	27		Stain 1 Positive Cells	71		Stain 1 Positive Cells	51		Stain 1 Positive Cells	0		Stain 1 Positive Cells	17
		Stain 1 0+ Cells	3462		Stain 1 0+ Cells	2261		Stain 1 0+ Cells	2308		Stain 1 0+ Cells	1721		Stain 1 0+ Cells	1582		Stain 1 0+ Cells	1872		Stain 1 0+ Cells	2519		Stain 1 0+ Cells	2408
		Stain 1 1+ Cells	11		Stain 1 1+ Cells	2		Stain 1 1+ Cells	9		Stain 1 1+ Cells	15		Stain 1 1+ Cells	40		Stain 1 1+ Cells	14		Stain 1 1+ Cells	0		Stain 1 1+ Cells	9
		Stain 1 2+ Cells	3		Stain 1 2+ Cells	2		Stain 1 2+ Cells	5		Stain 1 2+ Cells	5		Stain 1 2+ Cells	14		Stain 1 2+ Cells	23		Stain 1 2+ Cells	0		Stain 1 2+ Cells	4
		Stain 1 3+ Cells	0		Stain 1 3+ Cells	0		Stain 1 3+ Cells	1		Stain 1 3+ Cells	7		Stain 1 3+ Cells	17		Stain 1 3+ Cells	14		Stain 1 3+ Cells	0		Stain 1 3+ Cells	4
		Stain 2 Positive Cells	0		Stain 2 Positive Cells	0		Stain 2 Positive Cells	0		Stain 2 Positive Cells	0		Stain 2 Positive Cells	0		Stain 2 Positive Cells	0		Stain 2 Positive Cells	0		Stain 2 Positive Cells	0
		Stain 2 0+ Cells	3476		Stain 2 0+ Cells	2265		Stain 2 0+ Cells	2323		Stain 2 0+ Cells	1748		Stain 2 0+ Cells	1653		Stain 2 0+ Cells	1923		Stain 2 0+ Cells	2519		Stain 2 0+ Cells	2425
		Stain 2 1+ Cells	0		Stain 2 1+ Cells	0		Stain 2 1+ Cells	0		Stain 2 1+ Cells	0		Stain 2 1+ Cells	0		Stain 2 1+ Cells	0		Stain 2 1+ Cells	0		Stain 2 1+ Cells	0
		Stain 2 2+ Cells	0		Stain 2 2+ Cells	0		Stain 2 2+ Cells	0		Stain 2 2+ Cells	0		Stain 2 2+ Cells	0		Stain 2 2+ Cells	0		Stain 2 2+ Cells	0		Stain 2 2+ Cells	0
		Stain 2 3+ Cells	0		Stain 2 3+ Cells	0		Stain 2 3+ Cells	0		Stain 2 3+ Cells	0		Stain 2 3+ Cells	0		Stain 2 3+ Cells	0		Stain 2 3+ Cells	0		Stain 2 3+ Cells	0
		Dual Positive Cells	0		Dual Positive Cells	0		Dual Positive Cells	0		Dual Positive Cells	0		Dual Positive Cells	0		Dual Positive Cells	0		Dual Positive Cells	0		Dual Positive Cells	0
		Dual Negative Cells	3462		Dual Negative Cells	2261		Dual Negative Cells	2308		Dual Negative Cells	1721		Dual Negative Cells	1582		Dual Negative Cells	1872		Dual Negative Cells	2519		Dual Negative Cells	2408
		% Stain 1 Positive Cells	0.402762		% Stain 1 Positive Cells	0.1766		% Stain 1 Positive Cells	0.645717		% Stain 1 Positive Cells	1.54462		% Stain 1 Positive Cells	4.29522		% Stain 1 Positive Cells	2.65211		% Stain 1 Positive Cells	0		% Stain 1 Positive Cells	0.701031
		% Stain 1 0+ Cells	99.5972		% Stain 1 0+ Cells	99.8234		% Stain 1 0+ Cells	99.3543		% Stain 1 0+ Cells	98.4554		% Stain 1 0+ Cells	95.7048		% Stain 1 0+ Cells	97.3479		% Stain 1 0+ Cells	100		% Stain 1 0+ Cells	99.299
		% Stain 1 1+ Cells	0.316456		% Stain 1 1+ Cells	0.0883002		% Stain 1 1+ Cells	0.38743		% Stain 1 1+ Cells	0.858124		% Stain 1 1+ Cells	2.41984		% Stain 1 1+ Cells	0.728029		% Stain 1 1+ Cells	0		% Stain 1 1+ Cells	0.371134
		% Stain 1 2+ Cells	0.0863061		% Stain 1 2+ Cells	0.0883002		% Stain 1 2+ Cells	0.215239		% Stain 1 2+ Cells	0.286041		% Stain 1 2+ Cells	0.846945		% Stain 1 2+ Cells	1.19605		% Stain 1 2+ Cells	0		% Stain 1 2+ Cells	0.164948
		% Stain 1 3+ Cells	0		% Stain 1 3+ Cells	0		% Stain 1 3+ Cells	0.0430478		% Stain 1 3+ Cells	0.400458		% Stain 1 3+ Cells	1.02843		% Stain 1 3+ Cells	0.728029		% Stain 1 3+ Cells	0		% Stain 1 3+ Cells	0.164948
		Stain 1 H-Score	0.489068		Stain 1 H-Score	0.264901		Stain 1 H-Score	0.947051		Stain 1 H-Score	2.63158		Stain 1 H-Score	7.19903		Stain 1 H-Score	5.30421		Stain 1 H-Score	0		Stain 1 H-Score	1.19588
		% Stain 2 Positive Cells	0		% Stain 2 Positive Cells	0		% Stain 2 Positive Cells	0		% Stain 2 Positive Cells	0		% Stain 2 Positive Cells	0		% Stain 2 Positive Cells	0		% Stain 2 Positive Cells	0		% Stain 2 Positive Cells	0
		% Stain 2 0+ Cells	100		% Stain 2 0+ Cells	100		% Stain 2 0+ Cells	100		% Stain 2 0+ Cells	100		% Stain 2 0+ Cells	100		% Stain 2 0+ Cells	100		% Stain 2 0+ Cells	100		% Stain 2 0+ Cells	100
		% Stain 2 1+ Cells	0		% Stain 2 1+ Cells	0		% Stain 2 1+ Cells	0		% Stain 2 1+ Cells	0		% Stain 2 1+ Cells	0		% Stain 2 1+ Cells	0		% Stain 2 1+ Cells	0		% Stain 2 1+ Cells	0
		% Stain 2 2+ Cells	0		% Stain 2 2+ Cells	0		% Stain 2 2+ Cells	0		% Stain 2 2+ Cells	0		% Stain 2 2+ Cells	0		% Stain 2 2+ Cells	0		% Stain 2 2+ Cells	0		% Stain 2 2+ Cells	0
		% Stain 2 3+ Cells	0		% Stain 2 3+ Cells	0		% Stain 2 3+ Cells	0		% Stain 2 3+ Cells	0		% Stain 2 3+ Cells	0		% Stain 2 3+ Cells	0		% Stain 2 3+ Cells	0		% Stain 2 3+ Cells	0
		Stain 2 H-Score	0		Stain 2 H-Score	0		Stain 2 H-Score	0		Stain 2 H-Score	0		Stain 2 H-Score	0		Stain 2 H-Score	0		Stain 2 H-Score	0		Stain 2 H-Score	0
		% Dual Positive Cells	0		% Dual Positive Cells	0		% Dual Positive Cells	0		% Dual Positive Cells	0		% Dual Positive Cells	0		% Dual Positive Cells	0		% Dual Positive Cells	0		% Dual Positive Cells	0
		% Dual Negative Cells	99.5972		% Dual Negative Cells	99.8234		% Dual Negative Cells	99.3543		% Dual Negative Cells	98.4554		% Dual Negative Cells	95.7048		% Dual Negative Cells	97.3479		% Dual Negative Cells	100		% Dual Negative Cells	99.299
		Avg Stain 1 Nuclear OD	0.0302264		Avg Stain 1 Nuclear OD	0.0293914		Avg Stain 1 Nuclear OD	0.0311384		Avg Stain 1 Nuclear OD	0.03767		Avg Stain 1 Nuclear OD	0.0542304		Avg Stain 1 Nuclear OD	0.0454288		Avg Stain 1 Nuclear OD	0.0294161		Avg Stain 1 Nuclear OD	0.0327788
		Avg Stain 2 Nuclear OD	0.036391		Avg Stain 2 Nuclear OD	0.0362525		Avg Stain 2 Nuclear OD	0.0363604		Avg Stain 2 Nuclear OD	0.037164		Avg Stain 2 Nuclear OD	0.0375952		Avg Stain 2 Nuclear OD	0.0372185		Avg Stain 2 Nuclear OD	0.0354386		Avg Stain 2 Nuclear OD	0.0362016
		Avg Stain 1 Cytoplasmic OD	0.0291127		Avg Stain 1 Cytoplasmic OD	0.0290421		Avg Stain 1 Cytoplasmic OD	0.0293446		Avg Stain 1 Cytoplasmic OD	0.0311949		Avg Stain 1 Cytoplasmic OD	0.0348776		Avg Stain 1 Cytoplasmic OD	0.0328294		Avg Stain 1 Cytoplasmic OD	0.0309211		Avg Stain 1 Cytoplasmic OD	0.0310287
		Avg Stain 2 Cytoplasmic OD	0.0322737		Avg Stain 2 Cytoplasmic OD	0.0322905		Avg Stain 2 Cytoplasmic OD	0.0324689		Avg Stain 2 Cytoplasmic OD	0.0321653		Avg Stain 2 Cytoplasmic OD	0.0323776		Avg Stain 2 Cytoplasmic OD	0.0322536		Avg Stain 2 Cytoplasmic OD	0.0317565		Avg Stain 2 Cytoplasmic OD	0.0322252
		Avg Cell Area (µm²)	78.4721		Avg Cell Area (µm²)	82.1553		Avg Cell Area (µm²)	86.5736		Avg Cell Area (µm²)	89.4325		Avg Cell Area (µm²)	95.4141		Avg Cell Area (µm²)	89.8064		Avg Cell Area (µm²)	81.8613		Avg Cell Area (µm²)	78.8971
		Avg Cytoplasm Area (µm²)	52.6362		Avg Cytoplasm Area (µm²)	55.0727		Avg Cytoplasm Area (µm²)	58.686		Avg Cytoplasm Area (µm²)	61.7976		Avg Cytoplasm Area (µm²)	64.4308		Avg Cytoplasm Area (µm²)	60.7294		Avg Cytoplasm Area (µm²)	55.1191		Avg Cytoplasm Area (µm²)	50.9644
		Avg Nucleus Area (µm²)	25.8359		Avg Nucleus Area (µm²)	27.0826		Avg Nucleus Area (µm²)	27.8876		Avg Nucleus Area (µm²)	27.6349		Avg Nucleus Area (µm²)	30.9833		Avg Nucleus Area (µm²)	29.077		Avg Nucleus Area (µm²)	26.7422		Avg Nucleus Area (µm²)	27.9327
		Avg Nucleus Perimeter (µm)	10.264		Avg Nucleus Perimeter (µm)	10.7606		Avg Nucleus Perimeter (µm)	11.0712		Avg Nucleus Perimeter (µm)	10.942		Avg Nucleus Perimeter (µm)	12.2464		Avg Nucleus Perimeter (µm)	11.5313		Avg Nucleus Perimeter (µm)	10.6261		Avg Nucleus Perimeter (µm)	11.0878
		Avg Nucleus Roundness	0.669534		Avg Nucleus Roundness	0.667737		Avg Nucleus Roundness	0.668577		Avg Nucleus Roundness	0.681958		Avg Nucleus Roundness	0.675832		Avg Nucleus Roundness	0.685203		Avg Nucleus Roundness	0.666108		Avg Nucleus Roundness	0.654648
		Tissue Area (µm²)	507112		Tissue Area (µm²)	362239		Tissue Area (µm²)	395915		Tissue Area (µm²)	308507		Tissue Area (µm²)	311169		Tissue Area (µm²)	346743		Tissue Area (µm²)	389577		Tissue Area (µm²)	343068
		Tumor: Total Cells	3476		Tumor: Total Cells	2265		Tumor: Total Cells	2323		Tumor: Total Cells	1748		Tumor: Total Cells	1653		Tumor: Total Cells	1923		Tumor: Total Cells	2519		Tumor: Total Cells	2425
		Tumor: Stain 1 Positive Cells	14		Tumor: Stain 1 Positive Cells	4		Tumor: Stain 1 Positive Cells	15		Tumor: Stain 1 Positive Cells	27		Tumor: Stain 1 Positive Cells	71		Tumor: Stain 1 Positive Cells	51		Tumor: Stain 1 Positive Cells	0		Tumor: Stain 1 Positive Cells	17
		Tumor: Stain 1 0+ Cells	3462		Tumor: Stain 1 0+ Cells	2261		Tumor: Stain 1 0+ Cells	2308		Tumor: Stain 1 0+ Cells	1721		Tumor: Stain 1 0+ Cells	1582		Tumor: Stain 1 0+ Cells	1872		Tumor: Stain 1 0+ Cells	2519		Tumor: Stain 1 0+ Cells	2408
		Tumor: Stain 1 1+ Cells	11		Tumor: Stain 1 1+ Cells	2		Tumor: Stain 1 1+ Cells	9		Tumor: Stain 1 1+ Cells	15		Tumor: Stain 1 1+ Cells	40		Tumor: Stain 1 1+ Cells	14		Tumor: Stain 1 1+ Cells	0		Tumor: Stain 1 1+ Cells	9
		Tumor: Stain 1 2+ Cells	3		Tumor: Stain 1 2+ Cells	2		Tumor: Stain 1 2+ Cells	5		Tumor: Stain 1 2+ Cells	5		Tumor: Stain 1 2+ Cells	14		Tumor: Stain 1 2+ Cells	23		Tumor: Stain 1 2+ Cells	0		Tumor: Stain 1 2+ Cells	4
		Tumor: Stain 1 3+ Cells	0		Tumor: Stain 1 3+ Cells	0		Tumor: Stain 1 3+ Cells	1		Tumor: Stain 1 3+ Cells	7		Tumor: Stain 1 3+ Cells	17		Tumor: Stain 1 3+ Cells	14		Tumor: Stain 1 3+ Cells	0		Tumor: Stain 1 3+ Cells	4
		Tumor: Stain 2 Positive Cells	0		Tumor: Stain 2 Positive Cells	0		Tumor: Stain 2 Positive Cells	0		Tumor: Stain 2 Positive Cells	0		Tumor: Stain 2 Positive Cells	0		Tumor: Stain 2 Positive Cells	0		Tumor: Stain 2 Positive Cells	0		Tumor: Stain 2 Positive Cells	0
		Tumor: Stain 2 0+ Cells	3476		Tumor: Stain 2 0+ Cells	2265		Tumor: Stain 2 0+ Cells	2323		Tumor: Stain 2 0+ Cells	1748		Tumor: Stain 2 0+ Cells	1653		Tumor: Stain 2 0+ Cells	1923		Tumor: Stain 2 0+ Cells	2519		Tumor: Stain 2 0+ Cells	2425
		Tumor: Stain 2 1+ Cells	0		Tumor: Stain 2 1+ Cells	0		Tumor: Stain 2 1+ Cells	0		Tumor: Stain 2 1+ Cells	0		Tumor: Stain 2 1+ Cells	0		Tumor: Stain 2 1+ Cells	0		Tumor: Stain 2 1+ Cells	0		Tumor: Stain 2 1+ Cells	0
		Tumor: Stain 2 2+ Cells	0		Tumor: Stain 2 2+ Cells	0		Tumor: Stain 2 2+ Cells	0		Tumor: Stain 2 2+ Cells	0		Tumor: Stain 2 2+ Cells	0		Tumor: Stain 2 2+ Cells	0		Tumor: Stain 2 2+ Cells	0		Tumor: Stain 2 2+ Cells	0
		Tumor: Stain 2 3+ Cells	0		Tumor: Stain 2 3+ Cells	0		Tumor: Stain 2 3+ Cells	0		Tumor: Stain 2 3+ Cells	0		Tumor: Stain 2 3+ Cells	0		Tumor: Stain 2 3+ Cells	0		Tumor: Stain 2 3+ Cells	0		Tumor: Stain 2 3+ Cells	0
		Tumor: Dual Positive Cells	0		Tumor: Dual Positive Cells	0		Tumor: Dual Positive Cells	0		Tumor: Dual Positive Cells	0		Tumor: Dual Positive Cells	0		Tumor: Dual Positive Cells	0		Tumor: Dual Positive Cells	0		Tumor: Dual Positive Cells	0
		Tumor: Dual Negative Cells	3462		Tumor: Dual Negative Cells	2261		Tumor: Dual Negative Cells	2308		Tumor: Dual Negative Cells	1721		Tumor: Dual Negative Cells	1582		Tumor: Dual Negative Cells	1872		Tumor: Dual Negative Cells	2519		Tumor: Dual Negative Cells	2408
		Tumor: % Stain 1 Positive Cells	0.402762		Tumor: % Stain 1 Positive Cells	0.1766		Tumor: % Stain 1 Positive Cells	0.645717		Tumor: % Stain 1 Positive Cells	1.54462		Tumor: % Stain 1 Positive Cells	4.29522		Tumor: % Stain 1 Positive Cells	2.65211		Tumor: % Stain 1 Positive Cells	0		Tumor: % Stain 1 Positive Cells	0.701031		1.30226
		Tumor: % Stain 1 0+ Cells	99.5972		Tumor: % Stain 1 0+ Cells	99.8234		Tumor: % Stain 1 0+ Cells	99.3543		Tumor: % Stain 1 0+ Cells	98.4554		Tumor: % Stain 1 0+ Cells	95.7048		Tumor: % Stain 1 0+ Cells	97.3479		Tumor: % Stain 1 0+ Cells	100		Tumor: % Stain 1 0+ Cells	99.299
		Tumor: % Stain 1 1+ Cells	0.316456		Tumor: % Stain 1 1+ Cells	0.0883002		Tumor: % Stain 1 1+ Cells	0.38743		Tumor: % Stain 1 1+ Cells	0.858124		Tumor: % Stain 1 1+ Cells	2.41984		Tumor: % Stain 1 1+ Cells	0.728029		Tumor: % Stain 1 1+ Cells	0		Tumor: % Stain 1 1+ Cells	0.371134
		Tumor: % Stain 1 2+ Cells	0.0863061		Tumor: % Stain 1 2+ Cells	0.0883002		Tumor: % Stain 1 2+ Cells	0.215239		Tumor: % Stain 1 2+ Cells	0.286041		Tumor: % Stain 1 2+ Cells	0.846945		Tumor: % Stain 1 2+ Cells	1.19605		Tumor: % Stain 1 2+ Cells	0		Tumor: % Stain 1 2+ Cells	0.164948
		Tumor: % Stain 1 3+ Cells	0		Tumor: % Stain 1 3+ Cells	0		Tumor: % Stain 1 3+ Cells	0.0430478		Tumor: % Stain 1 3+ Cells	0.400458		Tumor: % Stain 1 3+ Cells	1.02843		Tumor: % Stain 1 3+ Cells	0.728029		Tumor: % Stain 1 3+ Cells	0		Tumor: % Stain 1 3+ Cells	0.164948
		Tumor: Stain 1 H-Score	0.489068		Tumor: Stain 1 H-Score	0.264901		Tumor: Stain 1 H-Score	0.947051		Tumor: Stain 1 H-Score	2.63158		Tumor: Stain 1 H-Score	7.19903		Tumor: Stain 1 H-Score	5.30421		Tumor: Stain 1 H-Score	0		Tumor: Stain 1 H-Score	1.19588
		Tumor: % Stain 2 Positive Cells	0		Tumor: % Stain 2 Positive Cells	0		Tumor: % Stain 2 Positive Cells	0		Tumor: % Stain 2 Positive Cells	0		Tumor: % Stain 2 Positive Cells	0		Tumor: % Stain 2 Positive Cells	0		Tumor: % Stain 2 Positive Cells	0		Tumor: % Stain 2 Positive Cells	0
		Tumor: % Stain 2 0+ Cells	100		Tumor: % Stain 2 0+ Cells	100		Tumor: % Stain 2 0+ Cells	100		Tumor: % Stain 2 0+ Cells	100		Tumor: % Stain 2 0+ Cells	100		Tumor: % Stain 2 0+ Cells	100		Tumor: % Stain 2 0+ Cells	100		Tumor: % Stain 2 0+ Cells	100
		Tumor: % Stain 2 1+ Cells	0		Tumor: % Stain 2 1+ Cells	0		Tumor: % Stain 2 1+ Cells	0		Tumor: % Stain 2 1+ Cells	0		Tumor: % Stain 2 1+ Cells	0		Tumor: % Stain 2 1+ Cells	0		Tumor: % Stain 2 1+ Cells	0		Tumor: % Stain 2 1+ Cells	0
		Tumor: % Stain 2 2+ Cells	0		Tumor: % Stain 2 2+ Cells	0		Tumor: % Stain 2 2+ Cells	0		Tumor: % Stain 2 2+ Cells	0		Tumor: % Stain 2 2+ Cells	0		Tumor: % Stain 2 2+ Cells	0		Tumor: % Stain 2 2+ Cells	0		Tumor: % Stain 2 2+ Cells	0
		Tumor: % Stain 2 3+ Cells	0		Tumor: % Stain 2 3+ Cells	0		Tumor: % Stain 2 3+ Cells	0		Tumor: % Stain 2 3+ Cells	0		Tumor: % Stain 2 3+ Cells	0		Tumor: % Stain 2 3+ Cells	0		Tumor: % Stain 2 3+ Cells	0		Tumor: % Stain 2 3+ Cells	0
		Tumor: Stain 2 H-Score	0		Tumor: Stain 2 H-Score	0		Tumor: Stain 2 H-Score	0		Tumor: Stain 2 H-Score	0		Tumor: Stain 2 H-Score	0		Tumor: Stain 2 H-Score	0		Tumor: Stain 2 H-Score	0		Tumor: Stain 2 H-Score	0
		Tumor: % Dual Positive Cells	0		Tumor: % Dual Positive Cells	0		Tumor: % Dual Positive Cells	0		Tumor: % Dual Positive Cells	0		Tumor: % Dual Positive Cells	0		Tumor: % Dual Positive Cells	0		Tumor: % Dual Positive Cells	0		Tumor: % Dual Positive Cells	0
		Tumor: % Dual Negative Cells	99.5972		Tumor: % Dual Negative Cells	99.8234		Tumor: % Dual Negative Cells	99.3543		Tumor: % Dual Negative Cells	98.4554		Tumor: % Dual Negative Cells	95.7048		Tumor: % Dual Negative Cells	97.3479		Tumor: % Dual Negative Cells	100		Tumor: % Dual Negative Cells	99.299
		Tumor: Avg Stain 1 Nuclear OD	0.0302264		Tumor: Avg Stain 1 Nuclear OD	0.0293914		Tumor: Avg Stain 1 Nuclear OD	0.0311384		Tumor: Avg Stain 1 Nuclear OD	0.03767		Tumor: Avg Stain 1 Nuclear OD	0.0542304		Tumor: Avg Stain 1 Nuclear OD	0.0454288		Tumor: Avg Stain 1 Nuclear OD	0.0294161		Tumor: Avg Stain 1 Nuclear OD	0.0327788
		Tumor: Avg Stain 2 Nuclear OD	0.036391		Tumor: Avg Stain 2 Nuclear OD	0.0362525		Tumor: Avg Stain 2 Nuclear OD	0.0363604		Tumor: Avg Stain 2 Nuclear OD	0.037164		Tumor: Avg Stain 2 Nuclear OD	0.0375952		Tumor: Avg Stain 2 Nuclear OD	0.0372185		Tumor: Avg Stain 2 Nuclear OD	0.0354386		Tumor: Avg Stain 2 Nuclear OD	0.0362016
		Tumor: Avg Stain 1 Cytoplasmic OD	0.0291127		Tumor: Avg Stain 1 Cytoplasmic OD	0.0290421		Tumor: Avg Stain 1 Cytoplasmic OD	0.0293446		Tumor: Avg Stain 1 Cytoplasmic OD	0.0311949		Tumor: Avg Stain 1 Cytoplasmic OD	0.0348776		Tumor: Avg Stain 1 Cytoplasmic OD	0.0328294		Tumor: Avg Stain 1 Cytoplasmic OD	0.0309211		Tumor: Avg Stain 1 Cytoplasmic OD	0.0310287
		Tumor: Avg Stain 2 Cytoplasmic OD	0.0322737		Tumor: Avg Stain 2 Cytoplasmic OD	0.0322905		Tumor: Avg Stain 2 Cytoplasmic OD	0.0324689		Tumor: Avg Stain 2 Cytoplasmic OD	0.0321653		Tumor: Avg Stain 2 Cytoplasmic OD	0.0323776		Tumor: Avg Stain 2 Cytoplasmic OD	0.0322536		Tumor: Avg Stain 2 Cytoplasmic OD	0.0317565		Tumor: Avg Stain 2 Cytoplasmic OD	0.0322252
		Tumor: Avg Cell Area (µm²)	78.4721		Tumor: Avg Cell Area (µm²)	82.1553		Tumor: Avg Cell Area (µm²)	86.5736		Tumor: Avg Cell Area (µm²)	89.4325		Tumor: Avg Cell Area (µm²)	95.4141		Tumor: Avg Cell Area (µm²)	89.8064		Tumor: Avg Cell Area (µm²)	81.8613		Tumor: Avg Cell Area (µm²)	78.8971
		Tumor: Avg Cytoplasm Area (µm²)	52.6362		Tumor: Avg Cytoplasm Area (µm²)	55.0727		Tumor: Avg Cytoplasm Area (µm²)	58.686		Tumor: Avg Cytoplasm Area (µm²)	61.7976		Tumor: Avg Cytoplasm Area (µm²)	64.4308		Tumor: Avg Cytoplasm Area (µm²)	60.7294		Tumor: Avg Cytoplasm Area (µm²)	55.1191		Tumor: Avg Cytoplasm Area (µm²)	50.9644
		Tumor: Avg Nucleus Area (µm²)	25.8359		Tumor: Avg Nucleus Area (µm²)	27.0826		Tumor: Avg Nucleus Area (µm²)	27.8876		Tumor: Avg Nucleus Area (µm²)	27.6349		Tumor: Avg Nucleus Area (µm²)	30.9833		Tumor: Avg Nucleus Area (µm²)	29.077		Tumor: Avg Nucleus Area (µm²)	26.7422		Tumor: Avg Nucleus Area (µm²)	27.9327
		Tumor: Avg Nucleus Perimeter (µm)	10.264		Tumor: Avg Nucleus Perimeter (µm)	10.7606		Tumor: Avg Nucleus Perimeter (µm)	11.0712		Tumor: Avg Nucleus Perimeter (µm)	10.942		Tumor: Avg Nucleus Perimeter (µm)	12.2464		Tumor: Avg Nucleus Perimeter (µm)	11.5313		Tumor: Avg Nucleus Perimeter (µm)	10.6261		Tumor: Avg Nucleus Perimeter (µm)	11.0878
		Tumor: Avg Nucleus Roundness	0.669534		Tumor: Avg Nucleus Roundness	0.667737		Tumor: Avg Nucleus Roundness	0.668577		Tumor: Avg Nucleus Roundness	0.681958		Tumor: Avg Nucleus Roundness	0.675832		Tumor: Avg Nucleus Roundness	0.685203		Tumor: Avg Nucleus Roundness	0.666108		Tumor: Avg Nucleus Roundness	0.654648
		Tumor: Tissue Area (µm²)	507112		Tumor: Tissue Area (µm²)	362239		Tumor: Tissue Area (µm²)	395915		Tumor: Tissue Area (µm²)	308507		Tumor: Tissue Area (µm²)	311169		Tumor: Tissue Area (µm²)	346743		Tumor: Tissue Area (µm²)	389577		Tumor: Tissue Area (µm²)	343068
		BSNA11.1g	HOM
		Name	Value		Name	Value		Name	Value		Name	Value		Name	Value		Name	Value		Name	Value		Name	Value
		Classified Area (mm²)	0.69127		Classified Area (mm²)	0.69127		Classified Area (mm²)	1.1124		Classified Area (mm²)	0.69658		Classified Area (mm²)	0.59286		Classified Area (mm²)	0.88591		Classified Area (mm²)	0.50978		Classified Area (mm²)	0.64327
		Tumor Area (mm²)	0.67267		Tumor Area (mm²)	0.67267		Tumor Area (mm²)	1.11011		Tumor Area (mm²)	0.69566		Tumor Area (mm²)	0.5923		Tumor Area (mm²)	0.88398		Tumor Area (mm²)	0.50727		Tumor Area (mm²)	0.63298
		Necrosis Area (mm²)	0		Necrosis Area (mm²)	0		Necrosis Area (mm²)	0.00075		Necrosis Area (mm²)	0		Necrosis Area (mm²)	0		Necrosis Area (mm²)	0		Necrosis Area (mm²)	0		Necrosis Area (mm²)	0
		Empty Area (mm²)	0.00462		Empty Area (mm²)	0.00462		Empty Area (mm²)	0		Empty Area (mm²)	9e-05		Empty Area (mm²)	0		Empty Area (mm²)	0.00011		Empty Area (mm²)	0.00192		Empty Area (mm²)	0.00542
		Normal Area (mm²)	0.01398		Normal Area (mm²)	0.01398		Normal Area (mm²)	0.00154		Normal Area (mm²)	0.00083		Normal Area (mm²)	0.00056		Normal Area (mm²)	0.00182		Normal Area (mm²)	0.0006		Normal Area (mm²)	0.00487
		Total Cells	3652		Total Cells	3652		Total Cells	5847		Total Cells	3494		Total Cells	2938		Total Cells	4637		Total Cells	2430		Total Cells	2954
		Stain 1 Positive Cells	11		Stain 1 Positive Cells	11		Stain 1 Positive Cells	25		Stain 1 Positive Cells	15		Stain 1 Positive Cells	13		Stain 1 Positive Cells	22		Stain 1 Positive Cells	5		Stain 1 Positive Cells	14
		Stain 1 0+ Cells	3641		Stain 1 0+ Cells	3641		Stain 1 0+ Cells	5822		Stain 1 0+ Cells	3479		Stain 1 0+ Cells	2925		Stain 1 0+ Cells	4615		Stain 1 0+ Cells	2425		Stain 1 0+ Cells	2940
		Stain 1 1+ Cells	3		Stain 1 1+ Cells	3		Stain 1 1+ Cells	13		Stain 1 1+ Cells	13		Stain 1 1+ Cells	5		Stain 1 1+ Cells	16		Stain 1 1+ Cells	0		Stain 1 1+ Cells	8
		Stain 1 2+ Cells	4		Stain 1 2+ Cells	4		Stain 1 2+ Cells	7		Stain 1 2+ Cells	1		Stain 1 2+ Cells	6		Stain 1 2+ Cells	6		Stain 1 2+ Cells	2		Stain 1 2+ Cells	4
		Stain 1 3+ Cells	4		Stain 1 3+ Cells	4		Stain 1 3+ Cells	5		Stain 1 3+ Cells	1		Stain 1 3+ Cells	2		Stain 1 3+ Cells	0		Stain 1 3+ Cells	3		Stain 1 3+ Cells	2
		Stain 2 Positive Cells	0		Stain 2 Positive Cells	0		Stain 2 Positive Cells	0		Stain 2 Positive Cells	0		Stain 2 Positive Cells	0		Stain 2 Positive Cells	0		Stain 2 Positive Cells	0		Stain 2 Positive Cells	0
		Stain 2 0+ Cells	3652		Stain 2 0+ Cells	3652		Stain 2 0+ Cells	5847		Stain 2 0+ Cells	3494		Stain 2 0+ Cells	2938		Stain 2 0+ Cells	4637		Stain 2 0+ Cells	2430		Stain 2 0+ Cells	2954
		Stain 2 1+ Cells	0		Stain 2 1+ Cells	0		Stain 2 1+ Cells	0		Stain 2 1+ Cells	0		Stain 2 1+ Cells	0		Stain 2 1+ Cells	0		Stain 2 1+ Cells	0		Stain 2 1+ Cells	0
		Stain 2 2+ Cells	0		Stain 2 2+ Cells	0		Stain 2 2+ Cells	0		Stain 2 2+ Cells	0		Stain 2 2+ Cells	0		Stain 2 2+ Cells	0		Stain 2 2+ Cells	0		Stain 2 2+ Cells	0
		Stain 2 3+ Cells	0		Stain 2 3+ Cells	0		Stain 2 3+ Cells	0		Stain 2 3+ Cells	0		Stain 2 3+ Cells	0		Stain 2 3+ Cells	0		Stain 2 3+ Cells	0		Stain 2 3+ Cells	0
		Dual Positive Cells	0		Dual Positive Cells	0		Dual Positive Cells	0		Dual Positive Cells	0		Dual Positive Cells	0		Dual Positive Cells	0		Dual Positive Cells	0		Dual Positive Cells	0
		Dual Negative Cells	3641		Dual Negative Cells	3641		Dual Negative Cells	5822		Dual Negative Cells	3479		Dual Negative Cells	2925		Dual Negative Cells	4615		Dual Negative Cells	2425		Dual Negative Cells	2940
		% Stain 1 Positive Cells	0.301205		% Stain 1 Positive Cells	0.301205		% Stain 1 Positive Cells	0.42757		% Stain 1 Positive Cells	0.429307		% Stain 1 Positive Cells	0.442478		% Stain 1 Positive Cells	0.474445		% Stain 1 Positive Cells	0.205761		% Stain 1 Positive Cells	0.473934
		% Stain 1 0+ Cells	99.6988		% Stain 1 0+ Cells	99.6988		% Stain 1 0+ Cells	99.5724		% Stain 1 0+ Cells	99.5707		% Stain 1 0+ Cells	99.5575		% Stain 1 0+ Cells	99.5256		% Stain 1 0+ Cells	99.7942		% Stain 1 0+ Cells	99.5261
		% Stain 1 1+ Cells	0.0821468		% Stain 1 1+ Cells	0.0821468		% Stain 1 1+ Cells	0.222336		% Stain 1 1+ Cells	0.372066		% Stain 1 1+ Cells	0.170184		% Stain 1 1+ Cells	0.345051		% Stain 1 1+ Cells	0		% Stain 1 1+ Cells	0.270819
		% Stain 1 2+ Cells	0.109529		% Stain 1 2+ Cells	0.109529		% Stain 1 2+ Cells	0.11972		% Stain 1 2+ Cells	0.0286205		% Stain 1 2+ Cells	0.204221		% Stain 1 2+ Cells	0.129394		% Stain 1 2+ Cells	0.0823045		% Stain 1 2+ Cells	0.13541
		% Stain 1 3+ Cells	0.109529		% Stain 1 3+ Cells	0.109529		% Stain 1 3+ Cells	0.0855139		% Stain 1 3+ Cells	0.0286205		% Stain 1 3+ Cells	0.0680735		% Stain 1 3+ Cells	0		% Stain 1 3+ Cells	0.123457		% Stain 1 3+ Cells	0.0677048
		Stain 1 H-Score	0.629792		Stain 1 H-Score	0.629792		Stain 1 H-Score	0.718317		Stain 1 H-Score	0.515169		Stain 1 H-Score	0.782845		Stain 1 H-Score	0.603839		Stain 1 H-Score	0.534979		Stain 1 H-Score	0.744753
		% Stain 2 Positive Cells	0		% Stain 2 Positive Cells	0		% Stain 2 Positive Cells	0		% Stain 2 Positive Cells	0		% Stain 2 Positive Cells	0		% Stain 2 Positive Cells	0		% Stain 2 Positive Cells	0		% Stain 2 Positive Cells	0
		% Stain 2 0+ Cells	100		% Stain 2 0+ Cells	100		% Stain 2 0+ Cells	100		% Stain 2 0+ Cells	100		% Stain 2 0+ Cells	100		% Stain 2 0+ Cells	100		% Stain 2 0+ Cells	100		% Stain 2 0+ Cells	100
		% Stain 2 1+ Cells	0		% Stain 2 1+ Cells	0		% Stain 2 1+ Cells	0		% Stain 2 1+ Cells	0		% Stain 2 1+ Cells	0		% Stain 2 1+ Cells	0		% Stain 2 1+ Cells	0		% Stain 2 1+ Cells	0
		% Stain 2 2+ Cells	0		% Stain 2 2+ Cells	0		% Stain 2 2+ Cells	0		% Stain 2 2+ Cells	0		% Stain 2 2+ Cells	0		% Stain 2 2+ Cells	0		% Stain 2 2+ Cells	0		% Stain 2 2+ Cells	0
		% Stain 2 3+ Cells	0		% Stain 2 3+ Cells	0		% Stain 2 3+ Cells	0		% Stain 2 3+ Cells	0		% Stain 2 3+ Cells	0		% Stain 2 3+ Cells	0		% Stain 2 3+ Cells	0		% Stain 2 3+ Cells	0
		Stain 2 H-Score	0		Stain 2 H-Score	0		Stain 2 H-Score	0		Stain 2 H-Score	0		Stain 2 H-Score	0		Stain 2 H-Score	0		Stain 2 H-Score	0		Stain 2 H-Score	0
		% Dual Positive Cells	0		% Dual Positive Cells	0		% Dual Positive Cells	0		% Dual Positive Cells	0		% Dual Positive Cells	0		% Dual Positive Cells	0		% Dual Positive Cells	0		% Dual Positive Cells	0
		% Dual Negative Cells	99.6988		% Dual Negative Cells	99.6988		% Dual Negative Cells	99.5724		% Dual Negative Cells	99.5707		% Dual Negative Cells	99.5575		% Dual Negative Cells	99.5256		% Dual Negative Cells	99.7942		% Dual Negative Cells	99.5261
		Avg Stain 1 Nuclear OD	0.0302032		Avg Stain 1 Nuclear OD	0.0302032		Avg Stain 1 Nuclear OD	0.0307707		Avg Stain 1 Nuclear OD	0.0305767		Avg Stain 1 Nuclear OD	0.0307215		Avg Stain 1 Nuclear OD	0.0308342		Avg Stain 1 Nuclear OD	0.0299248		Avg Stain 1 Nuclear OD	0.0313921
		Avg Stain 2 Nuclear OD	0.0359504		Avg Stain 2 Nuclear OD	0.0359504		Avg Stain 2 Nuclear OD	0.0360748		Avg Stain 2 Nuclear OD	0.0357498		Avg Stain 2 Nuclear OD	0.0355998		Avg Stain 2 Nuclear OD	0.0355213		Avg Stain 2 Nuclear OD	0.0350443		Avg Stain 2 Nuclear OD	0.035064
		Avg Stain 1 Cytoplasmic OD	0.0299083		Avg Stain 1 Cytoplasmic OD	0.0299083		Avg Stain 1 Cytoplasmic OD	0.030097		Avg Stain 1 Cytoplasmic OD	0.0299942		Avg Stain 1 Cytoplasmic OD	0.0297944		Avg Stain 1 Cytoplasmic OD	0.0299113		Avg Stain 1 Cytoplasmic OD	0.0300077		Avg Stain 1 Cytoplasmic OD	0.0304421
		Avg Stain 2 Cytoplasmic OD	0.0317494		Avg Stain 2 Cytoplasmic OD	0.0317494		Avg Stain 2 Cytoplasmic OD	0.0319345		Avg Stain 2 Cytoplasmic OD	0.0317516		Avg Stain 2 Cytoplasmic OD	0.031744		Avg Stain 2 Cytoplasmic OD	0.0317934		Avg Stain 2 Cytoplasmic OD	0.0315858		Avg Stain 2 Cytoplasmic OD	0.0315666
		Avg Cell Area (µm²)	94.4766		Avg Cell Area (µm²)	94.4766		Avg Cell Area (µm²)	92.9247		Avg Cell Area (µm²)	98.4284		Avg Cell Area (µm²)	97.3241		Avg Cell Area (µm²)	96.5944		Avg Cell Area (µm²)	103.14		Avg Cell Area (µm²)	106.927
		Avg Cytoplasm Area (µm²)	64.3174		Avg Cytoplasm Area (µm²)	64.3174		Avg Cytoplasm Area (µm²)	65.0112		Avg Cytoplasm Area (µm²)	68.5854		Avg Cytoplasm Area (µm²)	67.8573		Avg Cytoplasm Area (µm²)	66.2641		Avg Cytoplasm Area (µm²)	71.3345		Avg Cytoplasm Area (µm²)	73.6844
		Avg Nucleus Area (µm²)	30.1591		Avg Nucleus Area (µm²)	30.1591		Avg Nucleus Area (µm²)	27.9134		Avg Nucleus Area (µm²)	29.843		Avg Nucleus Area (µm²)	29.4668		Avg Nucleus Area (µm²)	30.3303		Avg Nucleus Area (µm²)	31.8057		Avg Nucleus Area (µm²)	33.2428
		Avg Nucleus Perimeter (µm)	11.9559		Avg Nucleus Perimeter (µm)	11.9559		Avg Nucleus Perimeter (µm)	11.0648		Avg Nucleus Perimeter (µm)	11.8163		Avg Nucleus Perimeter (µm)	11.6899		Avg Nucleus Perimeter (µm)	12.0098		Avg Nucleus Perimeter (µm)	12.5678		Avg Nucleus Perimeter (µm)	13.1531
		Avg Nucleus Roundness	0.677261		Avg Nucleus Roundness	0.677261		Avg Nucleus Roundness	0.679378		Avg Nucleus Roundness	0.68278		Avg Nucleus Roundness	0.677463		Avg Nucleus Roundness	0.68221		Avg Nucleus Roundness	0.679012		Avg Nucleus Roundness	0.684857
		Tissue Area (µm²)	670012		Tissue Area (µm²)	670012		Tissue Area (µm²)	1088150		Tissue Area (µm²)	688488		Tissue Area (µm²)	575203		Tissue Area (µm²)	882938		Tissue Area (µm²)	501748		Tissue Area (µm²)	628689
		Tumor: Total Cells	3652		Tumor: Total Cells	3652		Tumor: Total Cells	5847		Tumor: Total Cells	3494		Tumor: Total Cells	2938		Tumor: Total Cells	4637		Tumor: Total Cells	2430		Tumor: Total Cells	2954
		Tumor: Stain 1 Positive Cells	11		Tumor: Stain 1 Positive Cells	11		Tumor: Stain 1 Positive Cells	25		Tumor: Stain 1 Positive Cells	15		Tumor: Stain 1 Positive Cells	13		Tumor: Stain 1 Positive Cells	22		Tumor: Stain 1 Positive Cells	5		Tumor: Stain 1 Positive Cells	14
		Tumor: Stain 1 0+ Cells	3641		Tumor: Stain 1 0+ Cells	3641		Tumor: Stain 1 0+ Cells	5822		Tumor: Stain 1 0+ Cells	3479		Tumor: Stain 1 0+ Cells	2925		Tumor: Stain 1 0+ Cells	4615		Tumor: Stain 1 0+ Cells	2425		Tumor: Stain 1 0+ Cells	2940
		Tumor: Stain 1 1+ Cells	3		Tumor: Stain 1 1+ Cells	3		Tumor: Stain 1 1+ Cells	13		Tumor: Stain 1 1+ Cells	13		Tumor: Stain 1 1+ Cells	5		Tumor: Stain 1 1+ Cells	16		Tumor: Stain 1 1+ Cells	0		Tumor: Stain 1 1+ Cells	8
		Tumor: Stain 1 2+ Cells	4		Tumor: Stain 1 2+ Cells	4		Tumor: Stain 1 2+ Cells	7		Tumor: Stain 1 2+ Cells	1		Tumor: Stain 1 2+ Cells	6		Tumor: Stain 1 2+ Cells	6		Tumor: Stain 1 2+ Cells	2		Tumor: Stain 1 2+ Cells	4
		Tumor: Stain 1 3+ Cells	4		Tumor: Stain 1 3+ Cells	4		Tumor: Stain 1 3+ Cells	5		Tumor: Stain 1 3+ Cells	1		Tumor: Stain 1 3+ Cells	2		Tumor: Stain 1 3+ Cells	0		Tumor: Stain 1 3+ Cells	3		Tumor: Stain 1 3+ Cells	2
		Tumor: Stain 2 Positive Cells	0		Tumor: Stain 2 Positive Cells	0		Tumor: Stain 2 Positive Cells	0		Tumor: Stain 2 Positive Cells	0		Tumor: Stain 2 Positive Cells	0		Tumor: Stain 2 Positive Cells	0		Tumor: Stain 2 Positive Cells	0		Tumor: Stain 2 Positive Cells	0
		Tumor: Stain 2 0+ Cells	3652		Tumor: Stain 2 0+ Cells	3652		Tumor: Stain 2 0+ Cells	5847		Tumor: Stain 2 0+ Cells	3494		Tumor: Stain 2 0+ Cells	2938		Tumor: Stain 2 0+ Cells	4637		Tumor: Stain 2 0+ Cells	2430		Tumor: Stain 2 0+ Cells	2954
		Tumor: Stain 2 1+ Cells	0		Tumor: Stain 2 1+ Cells	0		Tumor: Stain 2 1+ Cells	0		Tumor: Stain 2 1+ Cells	0		Tumor: Stain 2 1+ Cells	0		Tumor: Stain 2 1+ Cells	0		Tumor: Stain 2 1+ Cells	0		Tumor: Stain 2 1+ Cells	0
		Tumor: Stain 2 2+ Cells	0		Tumor: Stain 2 2+ Cells	0		Tumor: Stain 2 2+ Cells	0		Tumor: Stain 2 2+ Cells	0		Tumor: Stain 2 2+ Cells	0		Tumor: Stain 2 2+ Cells	0		Tumor: Stain 2 2+ Cells	0		Tumor: Stain 2 2+ Cells	0
		Tumor: Stain 2 3+ Cells	0		Tumor: Stain 2 3+ Cells	0		Tumor: Stain 2 3+ Cells	0		Tumor: Stain 2 3+ Cells	0		Tumor: Stain 2 3+ Cells	0		Tumor: Stain 2 3+ Cells	0		Tumor: Stain 2 3+ Cells	0		Tumor: Stain 2 3+ Cells	0
		Tumor: Dual Positive Cells	0		Tumor: Dual Positive Cells	0		Tumor: Dual Positive Cells	0		Tumor: Dual Positive Cells	0		Tumor: Dual Positive Cells	0		Tumor: Dual Positive Cells	0		Tumor: Dual Positive Cells	0		Tumor: Dual Positive Cells	0
		Tumor: Dual Negative Cells	3641		Tumor: Dual Negative Cells	3641		Tumor: Dual Negative Cells	5822		Tumor: Dual Negative Cells	3479		Tumor: Dual Negative Cells	2925		Tumor: Dual Negative Cells	4615		Tumor: Dual Negative Cells	2425		Tumor: Dual Negative Cells	2940
		Tumor: % Stain 1 Positive Cells	0.301205		Tumor: % Stain 1 Positive Cells	0.301205		Tumor: % Stain 1 Positive Cells	0.42757		Tumor: % Stain 1 Positive Cells	0.429307		Tumor: % Stain 1 Positive Cells	0.442478		Tumor: % Stain 1 Positive Cells	0.474445		Tumor: % Stain 1 Positive Cells	0.205761		Tumor: % Stain 1 Positive Cells	0.473934		0.381988
		Tumor: % Stain 1 0+ Cells	99.6988		Tumor: % Stain 1 0+ Cells	99.6988		Tumor: % Stain 1 0+ Cells	99.5724		Tumor: % Stain 1 0+ Cells	99.5707		Tumor: % Stain 1 0+ Cells	99.5575		Tumor: % Stain 1 0+ Cells	99.5256		Tumor: % Stain 1 0+ Cells	99.7942		Tumor: % Stain 1 0+ Cells	99.5261
		Tumor: % Stain 1 1+ Cells	0.0821468		Tumor: % Stain 1 1+ Cells	0.0821468		Tumor: % Stain 1 1+ Cells	0.222336		Tumor: % Stain 1 1+ Cells	0.372066		Tumor: % Stain 1 1+ Cells	0.170184		Tumor: % Stain 1 1+ Cells	0.345051		Tumor: % Stain 1 1+ Cells	0		Tumor: % Stain 1 1+ Cells	0.270819
		Tumor: % Stain 1 2+ Cells	0.109529		Tumor: % Stain 1 2+ Cells	0.109529		Tumor: % Stain 1 2+ Cells	0.11972		Tumor: % Stain 1 2+ Cells	0.0286205		Tumor: % Stain 1 2+ Cells	0.204221		Tumor: % Stain 1 2+ Cells	0.129394		Tumor: % Stain 1 2+ Cells	0.0823045		Tumor: % Stain 1 2+ Cells	0.13541
		Tumor: % Stain 1 3+ Cells	0.109529		Tumor: % Stain 1 3+ Cells	0.109529		Tumor: % Stain 1 3+ Cells	0.0855139		Tumor: % Stain 1 3+ Cells	0.0286205		Tumor: % Stain 1 3+ Cells	0.0680735		Tumor: % Stain 1 3+ Cells	0		Tumor: % Stain 1 3+ Cells	0.123457		Tumor: % Stain 1 3+ Cells	0.0677048
		Tumor: Stain 1 H-Score	0.629792		Tumor: Stain 1 H-Score	0.629792		Tumor: Stain 1 H-Score	0.718317		Tumor: Stain 1 H-Score	0.515169		Tumor: Stain 1 H-Score	0.782845		Tumor: Stain 1 H-Score	0.603839		Tumor: Stain 1 H-Score	0.534979		Tumor: Stain 1 H-Score	0.744753
		Tumor: % Stain 2 Positive Cells	0		Tumor: % Stain 2 Positive Cells	0		Tumor: % Stain 2 Positive Cells	0		Tumor: % Stain 2 Positive Cells	0		Tumor: % Stain 2 Positive Cells	0		Tumor: % Stain 2 Positive Cells	0		Tumor: % Stain 2 Positive Cells	0		Tumor: % Stain 2 Positive Cells	0
		Tumor: % Stain 2 0+ Cells	100		Tumor: % Stain 2 0+ Cells	100		Tumor: % Stain 2 0+ Cells	100		Tumor: % Stain 2 0+ Cells	100		Tumor: % Stain 2 0+ Cells	100		Tumor: % Stain 2 0+ Cells	100		Tumor: % Stain 2 0+ Cells	100		Tumor: % Stain 2 0+ Cells	100
		Tumor: % Stain 2 1+ Cells	0		Tumor: % Stain 2 1+ Cells	0		Tumor: % Stain 2 1+ Cells	0		Tumor: % Stain 2 1+ Cells	0		Tumor: % Stain 2 1+ Cells	0		Tumor: % Stain 2 1+ Cells	0		Tumor: % Stain 2 1+ Cells	0		Tumor: % Stain 2 1+ Cells	0
		Tumor: % Stain 2 2+ Cells	0		Tumor: % Stain 2 2+ Cells	0		Tumor: % Stain 2 2+ Cells	0		Tumor: % Stain 2 2+ Cells	0		Tumor: % Stain 2 2+ Cells	0		Tumor: % Stain 2 2+ Cells	0		Tumor: % Stain 2 2+ Cells	0		Tumor: % Stain 2 2+ Cells	0
		Tumor: % Stain 2 3+ Cells	0		Tumor: % Stain 2 3+ Cells	0		Tumor: % Stain 2 3+ Cells	0		Tumor: % Stain 2 3+ Cells	0		Tumor: % Stain 2 3+ Cells	0		Tumor: % Stain 2 3+ Cells	0		Tumor: % Stain 2 3+ Cells	0		Tumor: % Stain 2 3+ Cells	0
		Tumor: Stain 2 H-Score	0		Tumor: Stain 2 H-Score	0		Tumor: Stain 2 H-Score	0		Tumor: Stain 2 H-Score	0		Tumor: Stain 2 H-Score	0		Tumor: Stain 2 H-Score	0		Tumor: Stain 2 H-Score	0		Tumor: Stain 2 H-Score	0
		Tumor: % Dual Positive Cells	0		Tumor: % Dual Positive Cells	0		Tumor: % Dual Positive Cells	0		Tumor: % Dual Positive Cells	0		Tumor: % Dual Positive Cells	0		Tumor: % Dual Positive Cells	0		Tumor: % Dual Positive Cells	0		Tumor: % Dual Positive Cells	0
		Tumor: % Dual Negative Cells	99.6988		Tumor: % Dual Negative Cells	99.6988		Tumor: % Dual Negative Cells	99.5724		Tumor: % Dual Negative Cells	99.5707		Tumor: % Dual Negative Cells	99.5575		Tumor: % Dual Negative Cells	99.5256		Tumor: % Dual Negative Cells	99.7942		Tumor: % Dual Negative Cells	99.5261
		Tumor: Avg Stain 1 Nuclear OD	0.0302032		Tumor: Avg Stain 1 Nuclear OD	0.0302032		Tumor: Avg Stain 1 Nuclear OD	0.0307707		Tumor: Avg Stain 1 Nuclear OD	0.0305767		Tumor: Avg Stain 1 Nuclear OD	0.0307215		Tumor: Avg Stain 1 Nuclear OD	0.0308342		Tumor: Avg Stain 1 Nuclear OD	0.0299248		Tumor: Avg Stain 1 Nuclear OD	0.0313921
		Tumor: Avg Stain 2 Nuclear OD	0.0359504		Tumor: Avg Stain 2 Nuclear OD	0.0359504		Tumor: Avg Stain 2 Nuclear OD	0.0360748		Tumor: Avg Stain 2 Nuclear OD	0.0357498		Tumor: Avg Stain 2 Nuclear OD	0.0355998		Tumor: Avg Stain 2 Nuclear OD	0.0355213		Tumor: Avg Stain 2 Nuclear OD	0.0350443		Tumor: Avg Stain 2 Nuclear OD	0.035064
		Tumor: Avg Stain 1 Cytoplasmic OD	0.0299083		Tumor: Avg Stain 1 Cytoplasmic OD	0.0299083		Tumor: Avg Stain 1 Cytoplasmic OD	0.030097		Tumor: Avg Stain 1 Cytoplasmic OD	0.0299942		Tumor: Avg Stain 1 Cytoplasmic OD	0.0297944		Tumor: Avg Stain 1 Cytoplasmic OD	0.0299113		Tumor: Avg Stain 1 Cytoplasmic OD	0.0300077		Tumor: Avg Stain 1 Cytoplasmic OD	0.0304421
		Tumor: Avg Stain 2 Cytoplasmic OD	0.0317494		Tumor: Avg Stain 2 Cytoplasmic OD	0.0317494		Tumor: Avg Stain 2 Cytoplasmic OD	0.0319345		Tumor: Avg Stain 2 Cytoplasmic OD	0.0317516		Tumor: Avg Stain 2 Cytoplasmic OD	0.031744		Tumor: Avg Stain 2 Cytoplasmic OD	0.0317934		Tumor: Avg Stain 2 Cytoplasmic OD	0.0315858		Tumor: Avg Stain 2 Cytoplasmic OD	0.0315666
		Tumor: Avg Cell Area (µm²)	94.4766		Tumor: Avg Cell Area (µm²)	94.4766		Tumor: Avg Cell Area (µm²)	92.9247		Tumor: Avg Cell Area (µm²)	98.4284		Tumor: Avg Cell Area (µm²)	97.3241		Tumor: Avg Cell Area (µm²)	96.5944		Tumor: Avg Cell Area (µm²)	103.14		Tumor: Avg Cell Area (µm²)	106.927
		Tumor: Avg Cytoplasm Area (µm²)	64.3174		Tumor: Avg Cytoplasm Area (µm²)	64.3174		Tumor: Avg Cytoplasm Area (µm²)	65.0112		Tumor: Avg Cytoplasm Area (µm²)	68.5854		Tumor: Avg Cytoplasm Area (µm²)	67.8573		Tumor: Avg Cytoplasm Area (µm²)	66.2641		Tumor: Avg Cytoplasm Area (µm²)	71.3345		Tumor: Avg Cytoplasm Area (µm²)	73.6844
		Tumor: Avg Nucleus Area (µm²)	30.1591		Tumor: Avg Nucleus Area (µm²)	30.1591		Tumor: Avg Nucleus Area (µm²)	27.9134		Tumor: Avg Nucleus Area (µm²)	29.843		Tumor: Avg Nucleus Area (µm²)	29.4668		Tumor: Avg Nucleus Area (µm²)	30.3303		Tumor: Avg Nucleus Area (µm²)	31.8057		Tumor: Avg Nucleus Area (µm²)	33.2428
		Tumor: Avg Nucleus Perimeter (µm)	11.9559		Tumor: Avg Nucleus Perimeter (µm)	11.9559		Tumor: Avg Nucleus Perimeter (µm)	11.0648		Tumor: Avg Nucleus Perimeter (µm)	11.8163		Tumor: Avg Nucleus Perimeter (µm)	11.6899		Tumor: Avg Nucleus Perimeter (µm)	12.0098		Tumor: Avg Nucleus Perimeter (µm)	12.5678		Tumor: Avg Nucleus Perimeter (µm)	13.1531
		Tumor: Avg Nucleus Roundness	0.677261		Tumor: Avg Nucleus Roundness	0.677261		Tumor: Avg Nucleus Roundness	0.679378		Tumor: Avg Nucleus Roundness	0.68278		Tumor: Avg Nucleus Roundness	0.677463		Tumor: Avg Nucleus Roundness	0.68221		Tumor: Avg Nucleus Roundness	0.679012		Tumor: Avg Nucleus Roundness	0.684857
		Tumor: Tissue Area (µm²)	670012		Tumor: Tissue Area (µm²)	670012		Tumor: Tissue Area (µm²)	1088150		Tumor: Tissue Area (µm²)	688488		Tumor: Tissue Area (µm²)	575203		Tumor: Tissue Area (µm²)	882938		Tumor: Tissue Area (µm²)	501748		Tumor: Tissue Area (µm²)	628689
		BSNA9.4a	HOM
		Name	Value		Name	Value		Name	Value		Name	Value		Name	Value		Name	Value		Name	Value		Name	Value
		Classified Area (mm²)	0.80111		Classified Area (mm²)	1.06824		Classified Area (mm²)	1.03062		Classified Area (mm²)	1.03931		Classified Area (mm²)	0.9071		Classified Area (mm²)	0.69612		Classified Area (mm²)	0.7902		Classified Area (mm²)	0.92078
		Tumor Area (mm²)	0.79113		Tumor Area (mm²)	1.03006		Tumor Area (mm²)	1.01116		Tumor Area (mm²)	1.0108		Tumor Area (mm²)	0.88459		Tumor Area (mm²)	0.67438		Tumor Area (mm²)	0.71928		Tumor Area (mm²)	0.90788
		Necrosis Area (mm²)	0		Necrosis Area (mm²)	0		Necrosis Area (mm²)	0		Necrosis Area (mm²)	0.00108		Necrosis Area (mm²)	7e-05		Necrosis Area (mm²)	0		Necrosis Area (mm²)	0		Necrosis Area (mm²)	0
		Empty Area (mm²)	0.00044		Empty Area (mm²)	0		Empty Area (mm²)	0.00696		Empty Area (mm²)	0.0045		Empty Area (mm²)	0.00496		Empty Area (mm²)	0.00116		Empty Area (mm²)	0		Empty Area (mm²)	0
		Normal Area (mm²)	0.00955		Normal Area (mm²)	0.03818		Normal Area (mm²)	0.0125		Normal Area (mm²)	0.02292		Normal Area (mm²)	0.01748		Normal Area (mm²)	0.02058		Normal Area (mm²)	0.07092		Normal Area (mm²)	0.01289
		Total Cells	3321		Total Cells	4256		Total Cells	4838		Total Cells	4339		Total Cells	3730		Total Cells	3439		Total Cells	4120		Total Cells	4303
		Stain 1 Positive Cells	35		Stain 1 Positive Cells	78		Stain 1 Positive Cells	44		Stain 1 Positive Cells	76		Stain 1 Positive Cells	212		Stain 1 Positive Cells	44		Stain 1 Positive Cells	35		Stain 1 Positive Cells	70
		Stain 1 0+ Cells	3286		Stain 1 0+ Cells	4178		Stain 1 0+ Cells	4794		Stain 1 0+ Cells	4263		Stain 1 0+ Cells	3518		Stain 1 0+ Cells	3395		Stain 1 0+ Cells	4085		Stain 1 0+ Cells	4233
		Stain 1 1+ Cells	15		Stain 1 1+ Cells	52		Stain 1 1+ Cells	26		Stain 1 1+ Cells	35		Stain 1 1+ Cells	109		Stain 1 1+ Cells	19		Stain 1 1+ Cells	16		Stain 1 1+ Cells	33
		Stain 1 2+ Cells	11		Stain 1 2+ Cells	18		Stain 1 2+ Cells	6		Stain 1 2+ Cells	22		Stain 1 2+ Cells	59		Stain 1 2+ Cells	14		Stain 1 2+ Cells	11		Stain 1 2+ Cells	23
		Stain 1 3+ Cells	9		Stain 1 3+ Cells	8		Stain 1 3+ Cells	12		Stain 1 3+ Cells	19		Stain 1 3+ Cells	44		Stain 1 3+ Cells	11		Stain 1 3+ Cells	8		Stain 1 3+ Cells	14
		Stain 2 Positive Cells	0		Stain 2 Positive Cells	0		Stain 2 Positive Cells	0		Stain 2 Positive Cells	0		Stain 2 Positive Cells	0		Stain 2 Positive Cells	0		Stain 2 Positive Cells	0		Stain 2 Positive Cells	0
		Stain 2 0+ Cells	3321		Stain 2 0+ Cells	4256		Stain 2 0+ Cells	4838		Stain 2 0+ Cells	4339		Stain 2 0+ Cells	3730		Stain 2 0+ Cells	3439		Stain 2 0+ Cells	4120		Stain 2 0+ Cells	4303
		Stain 2 1+ Cells	0		Stain 2 1+ Cells	0		Stain 2 1+ Cells	0		Stain 2 1+ Cells	0		Stain 2 1+ Cells	0		Stain 2 1+ Cells	0		Stain 2 1+ Cells	0		Stain 2 1+ Cells	0
		Stain 2 2+ Cells	0		Stain 2 2+ Cells	0		Stain 2 2+ Cells	0		Stain 2 2+ Cells	0		Stain 2 2+ Cells	0		Stain 2 2+ Cells	0		Stain 2 2+ Cells	0		Stain 2 2+ Cells	0
		Stain 2 3+ Cells	0		Stain 2 3+ Cells	0		Stain 2 3+ Cells	0		Stain 2 3+ Cells	0		Stain 2 3+ Cells	0		Stain 2 3+ Cells	0		Stain 2 3+ Cells	0		Stain 2 3+ Cells	0
		Dual Positive Cells	0		Dual Positive Cells	0		Dual Positive Cells	0		Dual Positive Cells	0		Dual Positive Cells	0		Dual Positive Cells	0		Dual Positive Cells	0		Dual Positive Cells	0
		Dual Negative Cells	3286		Dual Negative Cells	4178		Dual Negative Cells	4794		Dual Negative Cells	4263		Dual Negative Cells	3518		Dual Negative Cells	3395		Dual Negative Cells	4085		Dual Negative Cells	4233
		% Stain 1 Positive Cells	1.0539		% Stain 1 Positive Cells	1.83271		% Stain 1 Positive Cells	0.909467		% Stain 1 Positive Cells	1.75156		% Stain 1 Positive Cells	5.68365		% Stain 1 Positive Cells	1.27944		% Stain 1 Positive Cells	0.849515		% Stain 1 Positive Cells	1.62677		1.87338
		% Stain 1 0+ Cells	98.9461		% Stain 1 0+ Cells	98.1673		% Stain 1 0+ Cells	99.0905		% Stain 1 0+ Cells	98.2484		% Stain 1 0+ Cells	94.3164		% Stain 1 0+ Cells	98.7206		% Stain 1 0+ Cells	99.1505		% Stain 1 0+ Cells	98.3732
		% Stain 1 1+ Cells	0.451671		% Stain 1 1+ Cells	1.2218		% Stain 1 1+ Cells	0.537412		% Stain 1 1+ Cells	0.806637		% Stain 1 1+ Cells	2.92225		% Stain 1 1+ Cells	0.552486		% Stain 1 1+ Cells	0.38835		% Stain 1 1+ Cells	0.766907
		% Stain 1 2+ Cells	0.331226		% Stain 1 2+ Cells	0.422932		% Stain 1 2+ Cells	0.124018		% Stain 1 2+ Cells	0.507029		% Stain 1 2+ Cells	1.58177		% Stain 1 2+ Cells	0.407095		% Stain 1 2+ Cells	0.26699		% Stain 1 2+ Cells	0.534511
		% Stain 1 3+ Cells	0.271003		% Stain 1 3+ Cells	0.18797		% Stain 1 3+ Cells	0.248036		% Stain 1 3+ Cells	0.437889		% Stain 1 3+ Cells	1.17962		% Stain 1 3+ Cells	0.31986		% Stain 1 3+ Cells	0.194175		% Stain 1 3+ Cells	0.325354
		Stain 1 H-Score	1.92713		Stain 1 H-Score	2.63158		Stain 1 H-Score	1.52956		Stain 1 H-Score	3.13436		Stain 1 H-Score	9.62466		Stain 1 H-Score	2.32626		Stain 1 H-Score	1.50485		Stain 1 H-Score	2.81199
		% Stain 2 Positive Cells	0		% Stain 2 Positive Cells	0		% Stain 2 Positive Cells	0		% Stain 2 Positive Cells	0		% Stain 2 Positive Cells	0		% Stain 2 Positive Cells	0		% Stain 2 Positive Cells	0		% Stain 2 Positive Cells	0
		% Stain 2 0+ Cells	100		% Stain 2 0+ Cells	100		% Stain 2 0+ Cells	100		% Stain 2 0+ Cells	100		% Stain 2 0+ Cells	100		% Stain 2 0+ Cells	100		% Stain 2 0+ Cells	100		% Stain 2 0+ Cells	100
		% Stain 2 1+ Cells	0		% Stain 2 1+ Cells	0		% Stain 2 1+ Cells	0		% Stain 2 1+ Cells	0		% Stain 2 1+ Cells	0		% Stain 2 1+ Cells	0		% Stain 2 1+ Cells	0		% Stain 2 1+ Cells	0
		% Stain 2 2+ Cells	0		% Stain 2 2+ Cells	0		% Stain 2 2+ Cells	0		% Stain 2 2+ Cells	0		% Stain 2 2+ Cells	0		% Stain 2 2+ Cells	0		% Stain 2 2+ Cells	0		% Stain 2 2+ Cells	0
		% Stain 2 3+ Cells	0		% Stain 2 3+ Cells	0		% Stain 2 3+ Cells	0		% Stain 2 3+ Cells	0		% Stain 2 3+ Cells	0		% Stain 2 3+ Cells	0		% Stain 2 3+ Cells	0		% Stain 2 3+ Cells	0
		Stain 2 H-Score	0		Stain 2 H-Score	0		Stain 2 H-Score	0		Stain 2 H-Score	0		Stain 2 H-Score	0		Stain 2 H-Score	0		Stain 2 H-Score	0		Stain 2 H-Score	0
		% Dual Positive Cells	0		% Dual Positive Cells	0		% Dual Positive Cells	0		% Dual Positive Cells	0		% Dual Positive Cells	0		% Dual Positive Cells	0		% Dual Positive Cells	0		% Dual Positive Cells	0
		% Dual Negative Cells	98.9461		% Dual Negative Cells	98.1673		% Dual Negative Cells	99.0905		% Dual Negative Cells	98.2484		% Dual Negative Cells	94.3164		% Dual Negative Cells	98.7206		% Dual Negative Cells	99.1505		% Dual Negative Cells	98.3732
		Avg Stain 1 Nuclear OD	0.0334205		Avg Stain 1 Nuclear OD	0.0384134		Avg Stain 1 Nuclear OD	0.0324882		Avg Stain 1 Nuclear OD	0.0378455		Avg Stain 1 Nuclear OD	0.0605256		Avg Stain 1 Nuclear OD	0.0349176		Avg Stain 1 Nuclear OD	0.0326224		Avg Stain 1 Nuclear OD	0.0374567
		Avg Stain 2 Nuclear OD	0.0367481		Avg Stain 2 Nuclear OD	0.0364504		Avg Stain 2 Nuclear OD	0.0368236		Avg Stain 2 Nuclear OD	0.0370861		Avg Stain 2 Nuclear OD	0.0387813		Avg Stain 2 Nuclear OD	0.0377097		Avg Stain 2 Nuclear OD	0.037304		Avg Stain 2 Nuclear OD	0.0372323
		Avg Stain 1 Cytoplasmic OD	0.0295893		Avg Stain 1 Cytoplasmic OD	0.0316456		Avg Stain 1 Cytoplasmic OD	0.0295511		Avg Stain 1 Cytoplasmic OD	0.0304433		Avg Stain 1 Cytoplasmic OD	0.0353176		Avg Stain 1 Cytoplasmic OD	0.0298972		Avg Stain 1 Cytoplasmic OD	0.0297159		Avg Stain 1 Cytoplasmic OD	0.030645
		Avg Stain 2 Cytoplasmic OD	0.0323711		Avg Stain 2 Cytoplasmic OD	0.0322618		Avg Stain 2 Cytoplasmic OD	0.0323027		Avg Stain 2 Cytoplasmic OD	0.0323282		Avg Stain 2 Cytoplasmic OD	0.0322774		Avg Stain 2 Cytoplasmic OD	0.0323145		Avg Stain 2 Cytoplasmic OD	0.0324092		Avg Stain 2 Cytoplasmic OD	0.0322893
		Avg Cell Area (µm²)	102.35		Avg Cell Area (µm²)	117.18		Avg Cell Area (µm²)	104.271		Avg Cell Area (µm²)	111.412		Avg Cell Area (µm²)	108.623		Avg Cell Area (µm²)	98.7169		Avg Cell Area (µm²)	95.5493		Avg Cell Area (µm²)	106.11
		Avg Cytoplasm Area (µm²)	68.7833		Avg Cytoplasm Area (µm²)	78.8766		Avg Cytoplasm Area (µm²)	71.515		Avg Cytoplasm Area (µm²)	76.945		Avg Cytoplasm Area (µm²)	73.5422		Avg Cytoplasm Area (µm²)	66.6273		Avg Cytoplasm Area (µm²)	62.3157		Avg Cytoplasm Area (µm²)	73.0627
		Avg Nucleus Area (µm²)	33.5669		Avg Nucleus Area (µm²)	38.3036		Avg Nucleus Area (µm²)	32.7557		Avg Nucleus Area (µm²)	34.4673		Avg Nucleus Area (µm²)	35.0804		Avg Nucleus Area (µm²)	32.0896		Avg Nucleus Area (µm²)	33.2335		Avg Nucleus Area (µm²)	33.0476
		Avg Nucleus Perimeter (µm)	13.0286		Avg Nucleus Perimeter (µm)	14.6852		Avg Nucleus Perimeter (µm)	12.9249		Avg Nucleus Perimeter (µm)	13.3471		Avg Nucleus Perimeter (µm)	13.6053		Avg Nucleus Perimeter (µm)	12.662		Avg Nucleus Perimeter (µm)	13.1268		Avg Nucleus Perimeter (µm)	12.983
		Avg Nucleus Roundness	0.679255		Avg Nucleus Roundness	0.688728		Avg Nucleus Roundness	0.674582		Avg Nucleus Roundness	0.682947		Avg Nucleus Roundness	0.682498		Avg Nucleus Roundness	0.675784		Avg Nucleus Roundness	0.674436		Avg Nucleus Roundness	0.682891
		Tissue Area (µm²)	662953		Tissue Area (µm²)	1028900		Tissue Area (µm²)	1004340		Tissue Area (µm²)	994028		Tissue Area (µm²)	791469		Tissue Area (µm²)	663997		Tissue Area (µm²)	734858		Tissue Area (µm²)	912066
		Tumor: Total Cells	3321		Tumor: Total Cells	4256		Tumor: Total Cells	4838		Tumor: Total Cells	4339		Tumor: Total Cells	3730		Tumor: Total Cells	3439		Tumor: Total Cells	4120		Tumor: Total Cells	4303
		Tumor: Stain 1 Positive Cells	35		Tumor: Stain 1 Positive Cells	78		Tumor: Stain 1 Positive Cells	44		Tumor: Stain 1 Positive Cells	76		Tumor: Stain 1 Positive Cells	212		Tumor: Stain 1 Positive Cells	44		Tumor: Stain 1 Positive Cells	35		Tumor: Stain 1 Positive Cells	70
		Tumor: Stain 1 0+ Cells	3286		Tumor: Stain 1 0+ Cells	4178		Tumor: Stain 1 0+ Cells	4794		Tumor: Stain 1 0+ Cells	4263		Tumor: Stain 1 0+ Cells	3518		Tumor: Stain 1 0+ Cells	3395		Tumor: Stain 1 0+ Cells	4085		Tumor: Stain 1 0+ Cells	4233
		Tumor: Stain 1 1+ Cells	15		Tumor: Stain 1 1+ Cells	52		Tumor: Stain 1 1+ Cells	26		Tumor: Stain 1 1+ Cells	35		Tumor: Stain 1 1+ Cells	109		Tumor: Stain 1 1+ Cells	19		Tumor: Stain 1 1+ Cells	16		Tumor: Stain 1 1+ Cells	33
		Tumor: Stain 1 2+ Cells	11		Tumor: Stain 1 2+ Cells	18		Tumor: Stain 1 2+ Cells	6		Tumor: Stain 1 2+ Cells	22		Tumor: Stain 1 2+ Cells	59		Tumor: Stain 1 2+ Cells	14		Tumor: Stain 1 2+ Cells	11		Tumor: Stain 1 2+ Cells	23
		Tumor: Stain 1 3+ Cells	9		Tumor: Stain 1 3+ Cells	8		Tumor: Stain 1 3+ Cells	12		Tumor: Stain 1 3+ Cells	19		Tumor: Stain 1 3+ Cells	44		Tumor: Stain 1 3+ Cells	11		Tumor: Stain 1 3+ Cells	8		Tumor: Stain 1 3+ Cells	14
		Tumor: Stain 2 Positive Cells	0		Tumor: Stain 2 Positive Cells	0		Tumor: Stain 2 Positive Cells	0		Tumor: Stain 2 Positive Cells	0		Tumor: Stain 2 Positive Cells	0		Tumor: Stain 2 Positive Cells	0		Tumor: Stain 2 Positive Cells	0		Tumor: Stain 2 Positive Cells	0
		Tumor: Stain 2 0+ Cells	3321		Tumor: Stain 2 0+ Cells	4256		Tumor: Stain 2 0+ Cells	4838		Tumor: Stain 2 0+ Cells	4339		Tumor: Stain 2 0+ Cells	3730		Tumor: Stain 2 0+ Cells	3439		Tumor: Stain 2 0+ Cells	4120		Tumor: Stain 2 0+ Cells	4303
		Tumor: Stain 2 1+ Cells	0		Tumor: Stain 2 1+ Cells	0		Tumor: Stain 2 1+ Cells	0		Tumor: Stain 2 1+ Cells	0		Tumor: Stain 2 1+ Cells	0		Tumor: Stain 2 1+ Cells	0		Tumor: Stain 2 1+ Cells	0		Tumor: Stain 2 1+ Cells	0
		Tumor: Stain 2 2+ Cells	0		Tumor: Stain 2 2+ Cells	0		Tumor: Stain 2 2+ Cells	0		Tumor: Stain 2 2+ Cells	0		Tumor: Stain 2 2+ Cells	0		Tumor: Stain 2 2+ Cells	0		Tumor: Stain 2 2+ Cells	0		Tumor: Stain 2 2+ Cells	0
		Tumor: Stain 2 3+ Cells	0		Tumor: Stain 2 3+ Cells	0		Tumor: Stain 2 3+ Cells	0		Tumor: Stain 2 3+ Cells	0		Tumor: Stain 2 3+ Cells	0		Tumor: Stain 2 3+ Cells	0		Tumor: Stain 2 3+ Cells	0		Tumor: Stain 2 3+ Cells	0
		Tumor: Dual Positive Cells	0		Tumor: Dual Positive Cells	0		Tumor: Dual Positive Cells	0		Tumor: Dual Positive Cells	0		Tumor: Dual Positive Cells	0		Tumor: Dual Positive Cells	0		Tumor: Dual Positive Cells	0		Tumor: Dual Positive Cells	0
		Tumor: Dual Negative Cells	3286		Tumor: Dual Negative Cells	4178		Tumor: Dual Negative Cells	4794		Tumor: Dual Negative Cells	4263		Tumor: Dual Negative Cells	3518		Tumor: Dual Negative Cells	3395		Tumor: Dual Negative Cells	4085		Tumor: Dual Negative Cells	4233
		Tumor: % Stain 1 Positive Cells	1.0539		Tumor: % Stain 1 Positive Cells	1.83271		Tumor: % Stain 1 Positive Cells	0.909467		Tumor: % Stain 1 Positive Cells	1.75156		Tumor: % Stain 1 Positive Cells	5.68365		Tumor: % Stain 1 Positive Cells	1.27944		Tumor: % Stain 1 Positive Cells	0.849515		Tumor: % Stain 1 Positive Cells	1.62677		1.87338
		Tumor: % Stain 1 0+ Cells	98.9461		Tumor: % Stain 1 0+ Cells	98.1673		Tumor: % Stain 1 0+ Cells	99.0905		Tumor: % Stain 1 0+ Cells	98.2484		Tumor: % Stain 1 0+ Cells	94.3164		Tumor: % Stain 1 0+ Cells	98.7206		Tumor: % Stain 1 0+ Cells	99.1505		Tumor: % Stain 1 0+ Cells	98.3732
		Tumor: % Stain 1 1+ Cells	0.451671		Tumor: % Stain 1 1+ Cells	1.2218		Tumor: % Stain 1 1+ Cells	0.537412		Tumor: % Stain 1 1+ Cells	0.806637		Tumor: % Stain 1 1+ Cells	2.92225		Tumor: % Stain 1 1+ Cells	0.552486		Tumor: % Stain 1 1+ Cells	0.38835		Tumor: % Stain 1 1+ Cells	0.766907
		Tumor: % Stain 1 2+ Cells	0.331226		Tumor: % Stain 1 2+ Cells	0.422932		Tumor: % Stain 1 2+ Cells	0.124018		Tumor: % Stain 1 2+ Cells	0.507029		Tumor: % Stain 1 2+ Cells	1.58177		Tumor: % Stain 1 2+ Cells	0.407095		Tumor: % Stain 1 2+ Cells	0.26699		Tumor: % Stain 1 2+ Cells	0.534511
		Tumor: % Stain 1 3+ Cells	0.271003		Tumor: % Stain 1 3+ Cells	0.18797		Tumor: % Stain 1 3+ Cells	0.248036		Tumor: % Stain 1 3+ Cells	0.437889		Tumor: % Stain 1 3+ Cells	1.17962		Tumor: % Stain 1 3+ Cells	0.31986		Tumor: % Stain 1 3+ Cells	0.194175		Tumor: % Stain 1 3+ Cells	0.325354
		Tumor: Stain 1 H-Score	1.92713		Tumor: Stain 1 H-Score	2.63158		Tumor: Stain 1 H-Score	1.52956		Tumor: Stain 1 H-Score	3.13436		Tumor: Stain 1 H-Score	9.62466		Tumor: Stain 1 H-Score	2.32626		Tumor: Stain 1 H-Score	1.50485		Tumor: Stain 1 H-Score	2.81199
		Tumor: % Stain 2 Positive Cells	0		Tumor: % Stain 2 Positive Cells	0		Tumor: % Stain 2 Positive Cells	0		Tumor: % Stain 2 Positive Cells	0		Tumor: % Stain 2 Positive Cells	0		Tumor: % Stain 2 Positive Cells	0		Tumor: % Stain 2 Positive Cells	0		Tumor: % Stain 2 Positive Cells	0
		Tumor: % Stain 2 0+ Cells	100		Tumor: % Stain 2 0+ Cells	100		Tumor: % Stain 2 0+ Cells	100		Tumor: % Stain 2 0+ Cells	100		Tumor: % Stain 2 0+ Cells	100		Tumor: % Stain 2 0+ Cells	100		Tumor: % Stain 2 0+ Cells	100		Tumor: % Stain 2 0+ Cells	100
		Tumor: % Stain 2 1+ Cells	0		Tumor: % Stain 2 1+ Cells	0		Tumor: % Stain 2 1+ Cells	0		Tumor: % Stain 2 1+ Cells	0		Tumor: % Stain 2 1+ Cells	0		Tumor: % Stain 2 1+ Cells	0		Tumor: % Stain 2 1+ Cells	0		Tumor: % Stain 2 1+ Cells	0
		Tumor: % Stain 2 2+ Cells	0		Tumor: % Stain 2 2+ Cells	0		Tumor: % Stain 2 2+ Cells	0		Tumor: % Stain 2 2+ Cells	0		Tumor: % Stain 2 2+ Cells	0		Tumor: % Stain 2 2+ Cells	0		Tumor: % Stain 2 2+ Cells	0		Tumor: % Stain 2 2+ Cells	0
		Tumor: % Stain 2 3+ Cells	0		Tumor: % Stain 2 3+ Cells	0		Tumor: % Stain 2 3+ Cells	0		Tumor: % Stain 2 3+ Cells	0		Tumor: % Stain 2 3+ Cells	0		Tumor: % Stain 2 3+ Cells	0		Tumor: % Stain 2 3+ Cells	0		Tumor: % Stain 2 3+ Cells	0
		Tumor: Stain 2 H-Score	0		Tumor: Stain 2 H-Score	0		Tumor: Stain 2 H-Score	0		Tumor: Stain 2 H-Score	0		Tumor: Stain 2 H-Score	0		Tumor: Stain 2 H-Score	0		Tumor: Stain 2 H-Score	0		Tumor: Stain 2 H-Score	0
		Tumor: % Dual Positive Cells	0		Tumor: % Dual Positive Cells	0		Tumor: % Dual Positive Cells	0		Tumor: % Dual Positive Cells	0		Tumor: % Dual Positive Cells	0		Tumor: % Dual Positive Cells	0		Tumor: % Dual Positive Cells	0		Tumor: % Dual Positive Cells	0
		Tumor: % Dual Negative Cells	98.9461		Tumor: % Dual Negative Cells	98.1673		Tumor: % Dual Negative Cells	99.0905		Tumor: % Dual Negative Cells	98.2484		Tumor: % Dual Negative Cells	94.3164		Tumor: % Dual Negative Cells	98.7206		Tumor: % Dual Negative Cells	99.1505		Tumor: % Dual Negative Cells	98.3732
		Tumor: Avg Stain 1 Nuclear OD	0.0334205		Tumor: Avg Stain 1 Nuclear OD	0.0384134		Tumor: Avg Stain 1 Nuclear OD	0.0324882		Tumor: Avg Stain 1 Nuclear OD	0.0378455		Tumor: Avg Stain 1 Nuclear OD	0.0605256		Tumor: Avg Stain 1 Nuclear OD	0.0349176		Tumor: Avg Stain 1 Nuclear OD	0.0326224		Tumor: Avg Stain 1 Nuclear OD	0.0374567
		Tumor: Avg Stain 2 Nuclear OD	0.0367481		Tumor: Avg Stain 2 Nuclear OD	0.0364504		Tumor: Avg Stain 2 Nuclear OD	0.0368236		Tumor: Avg Stain 2 Nuclear OD	0.0370861		Tumor: Avg Stain 2 Nuclear OD	0.0387813		Tumor: Avg Stain 2 Nuclear OD	0.0377097		Tumor: Avg Stain 2 Nuclear OD	0.037304		Tumor: Avg Stain 2 Nuclear OD	0.0372323
		Tumor: Avg Stain 1 Cytoplasmic OD	0.0295893		Tumor: Avg Stain 1 Cytoplasmic OD	0.0316456		Tumor: Avg Stain 1 Cytoplasmic OD	0.0295511		Tumor: Avg Stain 1 Cytoplasmic OD	0.0304433		Tumor: Avg Stain 1 Cytoplasmic OD	0.0353176		Tumor: Avg Stain 1 Cytoplasmic OD	0.0298972		Tumor: Avg Stain 1 Cytoplasmic OD	0.0297159		Tumor: Avg Stain 1 Cytoplasmic OD	0.030645
		Tumor: Avg Stain 2 Cytoplasmic OD	0.0323711		Tumor: Avg Stain 2 Cytoplasmic OD	0.0322618		Tumor: Avg Stain 2 Cytoplasmic OD	0.0323027		Tumor: Avg Stain 2 Cytoplasmic OD	0.0323282		Tumor: Avg Stain 2 Cytoplasmic OD	0.0322774		Tumor: Avg Stain 2 Cytoplasmic OD	0.0323145		Tumor: Avg Stain 2 Cytoplasmic OD	0.0324092		Tumor: Avg Stain 2 Cytoplasmic OD	0.0322893
		Tumor: Avg Cell Area (µm²)	102.35		Tumor: Avg Cell Area (µm²)	117.18		Tumor: Avg Cell Area (µm²)	104.271		Tumor: Avg Cell Area (µm²)	111.412		Tumor: Avg Cell Area (µm²)	108.623		Tumor: Avg Cell Area (µm²)	98.7169		Tumor: Avg Cell Area (µm²)	95.5493		Tumor: Avg Cell Area (µm²)	106.11
		Tumor: Avg Cytoplasm Area (µm²)	68.7833		Tumor: Avg Cytoplasm Area (µm²)	78.8766		Tumor: Avg Cytoplasm Area (µm²)	71.515		Tumor: Avg Cytoplasm Area (µm²)	76.945		Tumor: Avg Cytoplasm Area (µm²)	73.5422		Tumor: Avg Cytoplasm Area (µm²)	66.6273		Tumor: Avg Cytoplasm Area (µm²)	62.3157		Tumor: Avg Cytoplasm Area (µm²)	73.0627
		Tumor: Avg Nucleus Area (µm²)	33.5669		Tumor: Avg Nucleus Area (µm²)	38.3036		Tumor: Avg Nucleus Area (µm²)	32.7557		Tumor: Avg Nucleus Area (µm²)	34.4673		Tumor: Avg Nucleus Area (µm²)	35.0804		Tumor: Avg Nucleus Area (µm²)	32.0896		Tumor: Avg Nucleus Area (µm²)	33.2335		Tumor: Avg Nucleus Area (µm²)	33.0476
		Tumor: Avg Nucleus Perimeter (µm)	13.0286		Tumor: Avg Nucleus Perimeter (µm)	14.6852		Tumor: Avg Nucleus Perimeter (µm)	12.9249		Tumor: Avg Nucleus Perimeter (µm)	13.3471		Tumor: Avg Nucleus Perimeter (µm)	13.6053		Tumor: Avg Nucleus Perimeter (µm)	12.662		Tumor: Avg Nucleus Perimeter (µm)	13.1268		Tumor: Avg Nucleus Perimeter (µm)	12.983
		Tumor: Avg Nucleus Roundness	0.679255		Tumor: Avg Nucleus Roundness	0.688728		Tumor: Avg Nucleus Roundness	0.674582		Tumor: Avg Nucleus Roundness	0.682947		Tumor: Avg Nucleus Roundness	0.682498		Tumor: Avg Nucleus Roundness	0.675784		Tumor: Avg Nucleus Roundness	0.674436		Tumor: Avg Nucleus Roundness	0.682891
		Tumor: Tissue Area (µm²)	662953		Tumor: Tissue Area (µm²)	1028900		Tumor: Tissue Area (µm²)	1004340		Tumor: Tissue Area (µm²)	994028		Tumor: Tissue Area (µm²)	791469		Tumor: Tissue Area (µm²)	663997		Tumor: Tissue Area (µm²)	734858		Tumor: Tissue Area (µm²)	912066
		BSNA24.1d	HOM
		Name	Value		Name	Value		Name	Value		Name	Value		Name	Value		Name	Value		Name	Value		Name	Value
		Classified Area (mm²)	0.45763		Classified Area (mm²)	0.44864		Classified Area (mm²)	0.56619		Classified Area (mm²)	0.47352		Classified Area (mm²)	0.55966		Classified Area (mm²)	0.58254		Classified Area (mm²)	0.47981		Classified Area (mm²)	0.58466
		Tumor Area (mm²)	0.39022		Tumor Area (mm²)	0.44384		Tumor Area (mm²)	0.51411		Tumor Area (mm²)	0.46648		Tumor Area (mm²)	0.55172		Tumor Area (mm²)	0.56792		Tumor Area (mm²)	0.47718		Tumor Area (mm²)	0.58014
		Necrosis Area (mm²)	0		Necrosis Area (mm²)	0		Necrosis Area (mm²)	0		Necrosis Area (mm²)	0		Necrosis Area (mm²)	0		Necrosis Area (mm²)	0		Necrosis Area (mm²)	0		Necrosis Area (mm²)	0
		Empty Area (mm²)	0.06652		Empty Area (mm²)	0.00028		Empty Area (mm²)	0.05201		Empty Area (mm²)	0.00053		Empty Area (mm²)	0.00634		Empty Area (mm²)	0.01126		Empty Area (mm²)	0		Empty Area (mm²)	0.00078
		Normal Area (mm²)	0.00089		Normal Area (mm²)	0.00452		Normal Area (mm²)	6e-05		Normal Area (mm²)	0.00651		Normal Area (mm²)	0.00161		Normal Area (mm²)	0.00336		Normal Area (mm²)	0.00262		Normal Area (mm²)	0.00374
		Total Cells	1736		Total Cells	2365		Total Cells	2211		Total Cells	1960		Total Cells	2564		Total Cells	2691		Total Cells	2569		Total Cells	2295
		Stain 1 Positive Cells	19		Stain 1 Positive Cells	11		Stain 1 Positive Cells	7		Stain 1 Positive Cells	73		Stain 1 Positive Cells	25		Stain 1 Positive Cells	18		Stain 1 Positive Cells	13		Stain 1 Positive Cells	44
		Stain 1 0+ Cells	1717		Stain 1 0+ Cells	2354		Stain 1 0+ Cells	2204		Stain 1 0+ Cells	1887		Stain 1 0+ Cells	2539		Stain 1 0+ Cells	2673		Stain 1 0+ Cells	2556		Stain 1 0+ Cells	2251
		Stain 1 1+ Cells	10		Stain 1 1+ Cells	4		Stain 1 1+ Cells	5		Stain 1 1+ Cells	38		Stain 1 1+ Cells	17		Stain 1 1+ Cells	9		Stain 1 1+ Cells	6		Stain 1 1+ Cells	23
		Stain 1 2+ Cells	8		Stain 1 2+ Cells	3		Stain 1 2+ Cells	1		Stain 1 2+ Cells	22		Stain 1 2+ Cells	6		Stain 1 2+ Cells	7		Stain 1 2+ Cells	2		Stain 1 2+ Cells	16
		Stain 1 3+ Cells	1		Stain 1 3+ Cells	4		Stain 1 3+ Cells	1		Stain 1 3+ Cells	13		Stain 1 3+ Cells	2		Stain 1 3+ Cells	2		Stain 1 3+ Cells	5		Stain 1 3+ Cells	5
		Stain 2 Positive Cells	0		Stain 2 Positive Cells	0		Stain 2 Positive Cells	0		Stain 2 Positive Cells	0		Stain 2 Positive Cells	0		Stain 2 Positive Cells	0		Stain 2 Positive Cells	0		Stain 2 Positive Cells	0
		Stain 2 0+ Cells	1736		Stain 2 0+ Cells	2365		Stain 2 0+ Cells	2211		Stain 2 0+ Cells	1960		Stain 2 0+ Cells	2564		Stain 2 0+ Cells	2691		Stain 2 0+ Cells	2569		Stain 2 0+ Cells	2295
		Stain 2 1+ Cells	0		Stain 2 1+ Cells	0		Stain 2 1+ Cells	0		Stain 2 1+ Cells	0		Stain 2 1+ Cells	0		Stain 2 1+ Cells	0		Stain 2 1+ Cells	0		Stain 2 1+ Cells	0
		Stain 2 2+ Cells	0		Stain 2 2+ Cells	0		Stain 2 2+ Cells	0		Stain 2 2+ Cells	0		Stain 2 2+ Cells	0		Stain 2 2+ Cells	0		Stain 2 2+ Cells	0		Stain 2 2+ Cells	0
		Stain 2 3+ Cells	0		Stain 2 3+ Cells	0		Stain 2 3+ Cells	0		Stain 2 3+ Cells	0		Stain 2 3+ Cells	0		Stain 2 3+ Cells	0		Stain 2 3+ Cells	0		Stain 2 3+ Cells	0
		Dual Positive Cells	0		Dual Positive Cells	0		Dual Positive Cells	0		Dual Positive Cells	0		Dual Positive Cells	0		Dual Positive Cells	0		Dual Positive Cells	0		Dual Positive Cells	0
		Dual Negative Cells	1717		Dual Negative Cells	2354		Dual Negative Cells	2204		Dual Negative Cells	1887		Dual Negative Cells	2539		Dual Negative Cells	2673		Dual Negative Cells	2556		Dual Negative Cells	2251
		% Stain 1 Positive Cells	1.09447		% Stain 1 Positive Cells	0.465116		% Stain 1 Positive Cells	0.316599		% Stain 1 Positive Cells	3.72449		% Stain 1 Positive Cells	0.975039		% Stain 1 Positive Cells	0.668896		% Stain 1 Positive Cells	0.506033		% Stain 1 Positive Cells	1.91721
		% Stain 1 0+ Cells	98.9055		% Stain 1 0+ Cells	99.5349		% Stain 1 0+ Cells	99.6834		% Stain 1 0+ Cells	96.2755		% Stain 1 0+ Cells	99.025		% Stain 1 0+ Cells	99.3311		% Stain 1 0+ Cells	99.494		% Stain 1 0+ Cells	98.0828
		% Stain 1 1+ Cells	0.576037		% Stain 1 1+ Cells	0.169133		% Stain 1 1+ Cells	0.226142		% Stain 1 1+ Cells	1.93878		% Stain 1 1+ Cells	0.663027		% Stain 1 1+ Cells	0.334448		% Stain 1 1+ Cells	0.233554		% Stain 1 1+ Cells	1.00218
		% Stain 1 2+ Cells	0.460829		% Stain 1 2+ Cells	0.12685		% Stain 1 2+ Cells	0.0452284		% Stain 1 2+ Cells	1.12245		% Stain 1 2+ Cells	0.234009		% Stain 1 2+ Cells	0.260126		% Stain 1 2+ Cells	0.0778513		% Stain 1 2+ Cells	0.697168
		% Stain 1 3+ Cells	0.0576037		% Stain 1 3+ Cells	0.169133		% Stain 1 3+ Cells	0.0452284		% Stain 1 3+ Cells	0.663265		% Stain 1 3+ Cells	0.0780031		% Stain 1 3+ Cells	0.0743218		% Stain 1 3+ Cells	0.194628		% Stain 1 3+ Cells	0.217865
		Stain 1 H-Score	1.67051		Stain 1 H-Score	0.930233		Stain 1 H-Score	0.452284		Stain 1 H-Score	6.17347		Stain 1 H-Score	1.36505		Stain 1 H-Score	1.07767		Stain 1 H-Score	0.973141		Stain 1 H-Score	3.05011
		% Stain 2 Positive Cells	0		% Stain 2 Positive Cells	0		% Stain 2 Positive Cells	0		% Stain 2 Positive Cells	0		% Stain 2 Positive Cells	0		% Stain 2 Positive Cells	0		% Stain 2 Positive Cells	0		% Stain 2 Positive Cells	0
		% Stain 2 0+ Cells	100		% Stain 2 0+ Cells	100		% Stain 2 0+ Cells	100		% Stain 2 0+ Cells	100		% Stain 2 0+ Cells	100		% Stain 2 0+ Cells	100		% Stain 2 0+ Cells	100		% Stain 2 0+ Cells	100
		% Stain 2 1+ Cells	0		% Stain 2 1+ Cells	0		% Stain 2 1+ Cells	0		% Stain 2 1+ Cells	0		% Stain 2 1+ Cells	0		% Stain 2 1+ Cells	0		% Stain 2 1+ Cells	0		% Stain 2 1+ Cells	0
		% Stain 2 2+ Cells	0		% Stain 2 2+ Cells	0		% Stain 2 2+ Cells	0		% Stain 2 2+ Cells	0		% Stain 2 2+ Cells	0		% Stain 2 2+ Cells	0		% Stain 2 2+ Cells	0		% Stain 2 2+ Cells	0
		% Stain 2 3+ Cells	0		% Stain 2 3+ Cells	0		% Stain 2 3+ Cells	0		% Stain 2 3+ Cells	0		% Stain 2 3+ Cells	0		% Stain 2 3+ Cells	0		% Stain 2 3+ Cells	0		% Stain 2 3+ Cells	0
		Stain 2 H-Score	0		Stain 2 H-Score	0		Stain 2 H-Score	0		Stain 2 H-Score	0		Stain 2 H-Score	0		Stain 2 H-Score	0		Stain 2 H-Score	0		Stain 2 H-Score	0
		% Dual Positive Cells	0		% Dual Positive Cells	0		% Dual Positive Cells	0		% Dual Positive Cells	0		% Dual Positive Cells	0		% Dual Positive Cells	0		% Dual Positive Cells	0		% Dual Positive Cells	0
		% Dual Negative Cells	98.9055		% Dual Negative Cells	99.5349		% Dual Negative Cells	99.6834		% Dual Negative Cells	96.2755		% Dual Negative Cells	99.025		% Dual Negative Cells	99.3311		% Dual Negative Cells	99.494		% Dual Negative Cells	98.0828
		Avg Stain 1 Nuclear OD	0.0334938		Avg Stain 1 Nuclear OD	0.0315991		Avg Stain 1 Nuclear OD	0.028833		Avg Stain 1 Nuclear OD	0.0493717		Avg Stain 1 Nuclear OD	0.0329654		Avg Stain 1 Nuclear OD	0.0319295		Avg Stain 1 Nuclear OD	0.0309962		Avg Stain 1 Nuclear OD	0.0384768
		Avg Stain 2 Nuclear OD	0.0369839		Avg Stain 2 Nuclear OD	0.0367132		Avg Stain 2 Nuclear OD	0.0378056		Avg Stain 2 Nuclear OD	0.0374006		Avg Stain 2 Nuclear OD	0.0363813		Avg Stain 2 Nuclear OD	0.0366581		Avg Stain 2 Nuclear OD	0.0355773		Avg Stain 2 Nuclear OD	0.0372697
		Avg Stain 1 Cytoplasmic OD	0.0301529		Avg Stain 1 Cytoplasmic OD	0.0294111		Avg Stain 1 Cytoplasmic OD	0.0290995		Avg Stain 1 Cytoplasmic OD	0.0326613		Avg Stain 1 Cytoplasmic OD	0.0296426		Avg Stain 1 Cytoplasmic OD	0.029751		Avg Stain 1 Cytoplasmic OD	0.0296916		Avg Stain 1 Cytoplasmic OD	0.0307932
		Avg Stain 2 Cytoplasmic OD	0.0322251		Avg Stain 2 Cytoplasmic OD	0.0317603		Avg Stain 2 Cytoplasmic OD	0.0326402		Avg Stain 2 Cytoplasmic OD	0.0321294		Avg Stain 2 Cytoplasmic OD	0.0320528		Avg Stain 2 Cytoplasmic OD	0.0319925		Avg Stain 2 Cytoplasmic OD	0.0316672		Avg Stain 2 Cytoplasmic OD	0.0323065
		Avg Cell Area (µm²)	70.0876		Avg Cell Area (µm²)	86.3199		Avg Cell Area (µm²)	74.4609		Avg Cell Area (µm²)	105.573		Avg Cell Area (µm²)	89.5153		Avg Cell Area (µm²)	92.2881		Avg Cell Area (µm²)	83.3974		Avg Cell Area (µm²)	96.7332
		Avg Cytoplasm Area (µm²)	45.8688		Avg Cytoplasm Area (µm²)	56.3279		Avg Cytoplasm Area (µm²)	49.6005		Avg Cytoplasm Area (µm²)	72.0108		Avg Cytoplasm Area (µm²)	59.8947		Avg Cytoplasm Area (µm²)	62.5541		Avg Cytoplasm Area (µm²)	56.5946		Avg Cytoplasm Area (µm²)	65.0244
		Avg Nucleus Area (µm²)	24.2188		Avg Nucleus Area (µm²)	29.992		Avg Nucleus Area (µm²)	24.8603		Avg Nucleus Area (µm²)	33.5624		Avg Nucleus Area (µm²)	29.6205		Avg Nucleus Area (µm²)	29.734		Avg Nucleus Area (µm²)	26.8028		Avg Nucleus Area (µm²)	31.7088
		Avg Nucleus Perimeter (µm)	9.61959		Avg Nucleus Perimeter (µm)	11.9061		Avg Nucleus Perimeter (µm)	9.87231		Avg Nucleus Perimeter (µm)	13.2397		Avg Nucleus Perimeter (µm)	11.7167		Avg Nucleus Perimeter (µm)	11.7871		Avg Nucleus Perimeter (µm)	10.6415		Avg Nucleus Perimeter (µm)	12.5005
		Avg Nucleus Roundness	0.667219		Avg Nucleus Roundness	0.665294		Avg Nucleus Roundness	0.662907		Avg Nucleus Roundness	0.676784		Avg Nucleus Roundness	0.670578		Avg Nucleus Roundness	0.669322		Avg Nucleus Roundness	0.666225		Avg Nucleus Roundness	0.672558
		Tissue Area (µm²)	204906		Tissue Area (µm²)	388641		Tissue Area (µm²)	292346		Tissue Area (µm²)	413853		Tissue Area (µm²)	433487		Tissue Area (µm²)	487251		Tissue Area (µm²)	410431		Tissue Area (µm²)	418945
		Tumor: Total Cells	1736		Tumor: Total Cells	2365		Tumor: Total Cells	2211		Tumor: Total Cells	1960		Tumor: Total Cells	2564		Tumor: Total Cells	2691		Tumor: Total Cells	2569		Tumor: Total Cells	2295
		Tumor: Stain 1 Positive Cells	19		Tumor: Stain 1 Positive Cells	11		Tumor: Stain 1 Positive Cells	7		Tumor: Stain 1 Positive Cells	73		Tumor: Stain 1 Positive Cells	25		Tumor: Stain 1 Positive Cells	18		Tumor: Stain 1 Positive Cells	13		Tumor: Stain 1 Positive Cells	44
		Tumor: Stain 1 0+ Cells	1717		Tumor: Stain 1 0+ Cells	2354		Tumor: Stain 1 0+ Cells	2204		Tumor: Stain 1 0+ Cells	1887		Tumor: Stain 1 0+ Cells	2539		Tumor: Stain 1 0+ Cells	2673		Tumor: Stain 1 0+ Cells	2556		Tumor: Stain 1 0+ Cells	2251
		Tumor: Stain 1 1+ Cells	10		Tumor: Stain 1 1+ Cells	4		Tumor: Stain 1 1+ Cells	5		Tumor: Stain 1 1+ Cells	38		Tumor: Stain 1 1+ Cells	17		Tumor: Stain 1 1+ Cells	9		Tumor: Stain 1 1+ Cells	6		Tumor: Stain 1 1+ Cells	23
		Tumor: Stain 1 2+ Cells	8		Tumor: Stain 1 2+ Cells	3		Tumor: Stain 1 2+ Cells	1		Tumor: Stain 1 2+ Cells	22		Tumor: Stain 1 2+ Cells	6		Tumor: Stain 1 2+ Cells	7		Tumor: Stain 1 2+ Cells	2		Tumor: Stain 1 2+ Cells	16
		Tumor: Stain 1 3+ Cells	1		Tumor: Stain 1 3+ Cells	4		Tumor: Stain 1 3+ Cells	1		Tumor: Stain 1 3+ Cells	13		Tumor: Stain 1 3+ Cells	2		Tumor: Stain 1 3+ Cells	2		Tumor: Stain 1 3+ Cells	5		Tumor: Stain 1 3+ Cells	5
		Tumor: Stain 2 Positive Cells	0		Tumor: Stain 2 Positive Cells	0		Tumor: Stain 2 Positive Cells	0		Tumor: Stain 2 Positive Cells	0		Tumor: Stain 2 Positive Cells	0		Tumor: Stain 2 Positive Cells	0		Tumor: Stain 2 Positive Cells	0		Tumor: Stain 2 Positive Cells	0
		Tumor: Stain 2 0+ Cells	1736		Tumor: Stain 2 0+ Cells	2365		Tumor: Stain 2 0+ Cells	2211		Tumor: Stain 2 0+ Cells	1960		Tumor: Stain 2 0+ Cells	2564		Tumor: Stain 2 0+ Cells	2691		Tumor: Stain 2 0+ Cells	2569		Tumor: Stain 2 0+ Cells	2295
		Tumor: Stain 2 1+ Cells	0		Tumor: Stain 2 1+ Cells	0		Tumor: Stain 2 1+ Cells	0		Tumor: Stain 2 1+ Cells	0		Tumor: Stain 2 1+ Cells	0		Tumor: Stain 2 1+ Cells	0		Tumor: Stain 2 1+ Cells	0		Tumor: Stain 2 1+ Cells	0
		Tumor: Stain 2 2+ Cells	0		Tumor: Stain 2 2+ Cells	0		Tumor: Stain 2 2+ Cells	0		Tumor: Stain 2 2+ Cells	0		Tumor: Stain 2 2+ Cells	0		Tumor: Stain 2 2+ Cells	0		Tumor: Stain 2 2+ Cells	0		Tumor: Stain 2 2+ Cells	0
		Tumor: Stain 2 3+ Cells	0		Tumor: Stain 2 3+ Cells	0		Tumor: Stain 2 3+ Cells	0		Tumor: Stain 2 3+ Cells	0		Tumor: Stain 2 3+ Cells	0		Tumor: Stain 2 3+ Cells	0		Tumor: Stain 2 3+ Cells	0		Tumor: Stain 2 3+ Cells	0
		Tumor: Dual Positive Cells	0		Tumor: Dual Positive Cells	0		Tumor: Dual Positive Cells	0		Tumor: Dual Positive Cells	0		Tumor: Dual Positive Cells	0		Tumor: Dual Positive Cells	0		Tumor: Dual Positive Cells	0		Tumor: Dual Positive Cells	0
		Tumor: Dual Negative Cells	1717		Tumor: Dual Negative Cells	2354		Tumor: Dual Negative Cells	2204		Tumor: Dual Negative Cells	1887		Tumor: Dual Negative Cells	2539		Tumor: Dual Negative Cells	2673		Tumor: Dual Negative Cells	2556		Tumor: Dual Negative Cells	2251
		Tumor: % Stain 1 Positive Cells	1.09447		Tumor: % Stain 1 Positive Cells	0.465116		Tumor: % Stain 1 Positive Cells	0.316599		Tumor: % Stain 1 Positive Cells	3.72449		Tumor: % Stain 1 Positive Cells	0.975039		Tumor: % Stain 1 Positive Cells	0.668896		Tumor: % Stain 1 Positive Cells	0.506033		Tumor: % Stain 1 Positive Cells	1.91721		1.20848
		Tumor: % Stain 1 0+ Cells	98.9055		Tumor: % Stain 1 0+ Cells	99.5349		Tumor: % Stain 1 0+ Cells	99.6834		Tumor: % Stain 1 0+ Cells	96.2755		Tumor: % Stain 1 0+ Cells	99.025		Tumor: % Stain 1 0+ Cells	99.3311		Tumor: % Stain 1 0+ Cells	99.494		Tumor: % Stain 1 0+ Cells	98.0828
		Tumor: % Stain 1 1+ Cells	0.576037		Tumor: % Stain 1 1+ Cells	0.169133		Tumor: % Stain 1 1+ Cells	0.226142		Tumor: % Stain 1 1+ Cells	1.93878		Tumor: % Stain 1 1+ Cells	0.663027		Tumor: % Stain 1 1+ Cells	0.334448		Tumor: % Stain 1 1+ Cells	0.233554		Tumor: % Stain 1 1+ Cells	1.00218
		Tumor: % Stain 1 2+ Cells	0.460829		Tumor: % Stain 1 2+ Cells	0.12685		Tumor: % Stain 1 2+ Cells	0.0452284		Tumor: % Stain 1 2+ Cells	1.12245		Tumor: % Stain 1 2+ Cells	0.234009		Tumor: % Stain 1 2+ Cells	0.260126		Tumor: % Stain 1 2+ Cells	0.0778513		Tumor: % Stain 1 2+ Cells	0.697168
		Tumor: % Stain 1 3+ Cells	0.0576037		Tumor: % Stain 1 3+ Cells	0.169133		Tumor: % Stain 1 3+ Cells	0.0452284		Tumor: % Stain 1 3+ Cells	0.663265		Tumor: % Stain 1 3+ Cells	0.0780031		Tumor: % Stain 1 3+ Cells	0.0743218		Tumor: % Stain 1 3+ Cells	0.194628		Tumor: % Stain 1 3+ Cells	0.217865
		Tumor: Stain 1 H-Score	1.67051		Tumor: Stain 1 H-Score	0.930233		Tumor: Stain 1 H-Score	0.452284		Tumor: Stain 1 H-Score	6.17347		Tumor: Stain 1 H-Score	1.36505		Tumor: Stain 1 H-Score	1.07767		Tumor: Stain 1 H-Score	0.973141		Tumor: Stain 1 H-Score	3.05011
		Tumor: % Stain 2 Positive Cells	0		Tumor: % Stain 2 Positive Cells	0		Tumor: % Stain 2 Positive Cells	0		Tumor: % Stain 2 Positive Cells	0		Tumor: % Stain 2 Positive Cells	0		Tumor: % Stain 2 Positive Cells	0		Tumor: % Stain 2 Positive Cells	0		Tumor: % Stain 2 Positive Cells	0
		Tumor: % Stain 2 0+ Cells	100		Tumor: % Stain 2 0+ Cells	100		Tumor: % Stain 2 0+ Cells	100		Tumor: % Stain 2 0+ Cells	100		Tumor: % Stain 2 0+ Cells	100		Tumor: % Stain 2 0+ Cells	100		Tumor: % Stain 2 0+ Cells	100		Tumor: % Stain 2 0+ Cells	100
		Tumor: % Stain 2 1+ Cells	0		Tumor: % Stain 2 1+ Cells	0		Tumor: % Stain 2 1+ Cells	0		Tumor: % Stain 2 1+ Cells	0		Tumor: % Stain 2 1+ Cells	0		Tumor: % Stain 2 1+ Cells	0		Tumor: % Stain 2 1+ Cells	0		Tumor: % Stain 2 1+ Cells	0
		Tumor: % Stain 2 2+ Cells	0		Tumor: % Stain 2 2+ Cells	0		Tumor: % Stain 2 2+ Cells	0		Tumor: % Stain 2 2+ Cells	0		Tumor: % Stain 2 2+ Cells	0		Tumor: % Stain 2 2+ Cells	0		Tumor: % Stain 2 2+ Cells	0		Tumor: % Stain 2 2+ Cells	0
		Tumor: % Stain 2 3+ Cells	0		Tumor: % Stain 2 3+ Cells	0		Tumor: % Stain 2 3+ Cells	0		Tumor: % Stain 2 3+ Cells	0		Tumor: % Stain 2 3+ Cells	0		Tumor: % Stain 2 3+ Cells	0		Tumor: % Stain 2 3+ Cells	0		Tumor: % Stain 2 3+ Cells	0
		Tumor: Stain 2 H-Score	0		Tumor: Stain 2 H-Score	0		Tumor: Stain 2 H-Score	0		Tumor: Stain 2 H-Score	0		Tumor: Stain 2 H-Score	0		Tumor: Stain 2 H-Score	0		Tumor: Stain 2 H-Score	0		Tumor: Stain 2 H-Score	0
		Tumor: % Dual Positive Cells	0		Tumor: % Dual Positive Cells	0		Tumor: % Dual Positive Cells	0		Tumor: % Dual Positive Cells	0		Tumor: % Dual Positive Cells	0		Tumor: % Dual Positive Cells	0		Tumor: % Dual Positive Cells	0		Tumor: % Dual Positive Cells	0
		Tumor: % Dual Negative Cells	98.9055		Tumor: % Dual Negative Cells	99.5349		Tumor: % Dual Negative Cells	99.6834		Tumor: % Dual Negative Cells	96.2755		Tumor: % Dual Negative Cells	99.025		Tumor: % Dual Negative Cells	99.3311		Tumor: % Dual Negative Cells	99.494		Tumor: % Dual Negative Cells	98.0828
		Tumor: Avg Stain 1 Nuclear OD	0.0334938		Tumor: Avg Stain 1 Nuclear OD	0.0315991		Tumor: Avg Stain 1 Nuclear OD	0.028833		Tumor: Avg Stain 1 Nuclear OD	0.0493717		Tumor: Avg Stain 1 Nuclear OD	0.0329654		Tumor: Avg Stain 1 Nuclear OD	0.0319295		Tumor: Avg Stain 1 Nuclear OD	0.0309962		Tumor: Avg Stain 1 Nuclear OD	0.0384768
		Tumor: Avg Stain 2 Nuclear OD	0.0369839		Tumor: Avg Stain 2 Nuclear OD	0.0367132		Tumor: Avg Stain 2 Nuclear OD	0.0378056		Tumor: Avg Stain 2 Nuclear OD	0.0374006		Tumor: Avg Stain 2 Nuclear OD	0.0363813		Tumor: Avg Stain 2 Nuclear OD	0.0366581		Tumor: Avg Stain 2 Nuclear OD	0.0355773		Tumor: Avg Stain 2 Nuclear OD	0.0372697
		Tumor: Avg Stain 1 Cytoplasmic OD	0.0301529		Tumor: Avg Stain 1 Cytoplasmic OD	0.0294111		Tumor: Avg Stain 1 Cytoplasmic OD	0.0290995		Tumor: Avg Stain 1 Cytoplasmic OD	0.0326613		Tumor: Avg Stain 1 Cytoplasmic OD	0.0296426		Tumor: Avg Stain 1 Cytoplasmic OD	0.029751		Tumor: Avg Stain 1 Cytoplasmic OD	0.0296916		Tumor: Avg Stain 1 Cytoplasmic OD	0.0307932
		Tumor: Avg Stain 2 Cytoplasmic OD	0.0322251		Tumor: Avg Stain 2 Cytoplasmic OD	0.0317603		Tumor: Avg Stain 2 Cytoplasmic OD	0.0326402		Tumor: Avg Stain 2 Cytoplasmic OD	0.0321294		Tumor: Avg Stain 2 Cytoplasmic OD	0.0320528		Tumor: Avg Stain 2 Cytoplasmic OD	0.0319925		Tumor: Avg Stain 2 Cytoplasmic OD	0.0316672		Tumor: Avg Stain 2 Cytoplasmic OD	0.0323065
		Tumor: Avg Cell Area (µm²)	70.0876		Tumor: Avg Cell Area (µm²)	86.3199		Tumor: Avg Cell Area (µm²)	74.4609		Tumor: Avg Cell Area (µm²)	105.573		Tumor: Avg Cell Area (µm²)	89.5153		Tumor: Avg Cell Area (µm²)	92.2881		Tumor: Avg Cell Area (µm²)	83.3974		Tumor: Avg Cell Area (µm²)	96.7332
		Tumor: Avg Cytoplasm Area (µm²)	45.8688		Tumor: Avg Cytoplasm Area (µm²)	56.3279		Tumor: Avg Cytoplasm Area (µm²)	49.6005		Tumor: Avg Cytoplasm Area (µm²)	72.0108		Tumor: Avg Cytoplasm Area (µm²)	59.8947		Tumor: Avg Cytoplasm Area (µm²)	62.5541		Tumor: Avg Cytoplasm Area (µm²)	56.5946		Tumor: Avg Cytoplasm Area (µm²)	65.0244
		Tumor: Avg Nucleus Area (µm²)	24.2188		Tumor: Avg Nucleus Area (µm²)	29.992		Tumor: Avg Nucleus Area (µm²)	24.8603		Tumor: Avg Nucleus Area (µm²)	33.5624		Tumor: Avg Nucleus Area (µm²)	29.6205		Tumor: Avg Nucleus Area (µm²)	29.734		Tumor: Avg Nucleus Area (µm²)	26.8028		Tumor: Avg Nucleus Area (µm²)	31.7088
		Tumor: Avg Nucleus Perimeter (µm)	9.61959		Tumor: Avg Nucleus Perimeter (µm)	11.9061		Tumor: Avg Nucleus Perimeter (µm)	9.87231		Tumor: Avg Nucleus Perimeter (µm)	13.2397		Tumor: Avg Nucleus Perimeter (µm)	11.7167		Tumor: Avg Nucleus Perimeter (µm)	11.7871		Tumor: Avg Nucleus Perimeter (µm)	10.6415		Tumor: Avg Nucleus Perimeter (µm)	12.5005
		Tumor: Avg Nucleus Roundness	0.667219		Tumor: Avg Nucleus Roundness	0.665294		Tumor: Avg Nucleus Roundness	0.662907		Tumor: Avg Nucleus Roundness	0.676784		Tumor: Avg Nucleus Roundness	0.670578		Tumor: Avg Nucleus Roundness	0.669322		Tumor: Avg Nucleus Roundness	0.666225		Tumor: Avg Nucleus Roundness	0.672558
		Tumor: Tissue Area (µm²)	204906		Tumor: Tissue Area (µm²)	388641		Tumor: Tissue Area (µm²)	292346		Tumor: Tissue Area (µm²)	413853		Tumor: Tissue Area (µm²)	433487		Tumor: Tissue Area (µm²)	487251		Tumor: Tissue Area (µm²)	410431		Tumor: Tissue Area (µm²)	418945
		BAJF108.1f	WT
		Name	Value		Name	Value		Name	Value		Name	Value		Name	Value		Name	Value		Name	Value		Name	Value
		Classified Area (mm²)	0.77607		Classified Area (mm²)	0.77882		Classified Area (mm²)	0.6485		Classified Area (mm²)	0.62998		Classified Area (mm²)	0.82179		Classified Area (mm²)	0.46076		Classified Area (mm²)	0.61378		Classified Area (mm²)	0.61607
		Tumor Area (mm²)	0.74227		Tumor Area (mm²)	0.76545		Tumor Area (mm²)	0.6436		Tumor Area (mm²)	0.62126		Tumor Area (mm²)	0.80721		Tumor Area (mm²)	0.45222		Tumor Area (mm²)	0.60071		Tumor Area (mm²)	0.60766
		Necrosis Area (mm²)	0		Necrosis Area (mm²)	0		Necrosis Area (mm²)	0.00038		Necrosis Area (mm²)	0.00054		Necrosis Area (mm²)	0		Necrosis Area (mm²)	0		Necrosis Area (mm²)	0		Necrosis Area (mm²)	0
		Empty Area (mm²)	0.01556		Empty Area (mm²)	0.00872		Empty Area (mm²)	0.00236		Empty Area (mm²)	0.00236		Empty Area (mm²)	0.00299		Empty Area (mm²)	0.0019		Empty Area (mm²)	0.00681		Empty Area (mm²)	5e-05
		Normal Area (mm²)	0.01824		Normal Area (mm²)	0.00465		Normal Area (mm²)	0.00215		Normal Area (mm²)	0.00582		Normal Area (mm²)	0.01159		Normal Area (mm²)	0.00664		Normal Area (mm²)	0.00626		Normal Area (mm²)	0.00836
		Total Cells	2909		Total Cells	3573		Total Cells	3036		Total Cells	2950		Total Cells	4101		Total Cells	1977		Total Cells	2789		Total Cells	3123
		Stain 1 Positive Cells	102		Stain 1 Positive Cells	38		Stain 1 Positive Cells	20		Stain 1 Positive Cells	22		Stain 1 Positive Cells	43		Stain 1 Positive Cells	45		Stain 1 Positive Cells	24		Stain 1 Positive Cells	191
		Stain 1 0+ Cells	2807		Stain 1 0+ Cells	3535		Stain 1 0+ Cells	3016		Stain 1 0+ Cells	2928		Stain 1 0+ Cells	4058		Stain 1 0+ Cells	1932		Stain 1 0+ Cells	2765		Stain 1 0+ Cells	2932
		Stain 1 1+ Cells	50		Stain 1 1+ Cells	14		Stain 1 1+ Cells	9		Stain 1 1+ Cells	15		Stain 1 1+ Cells	33		Stain 1 1+ Cells	21		Stain 1 1+ Cells	10		Stain 1 1+ Cells	96
		Stain 1 2+ Cells	25		Stain 1 2+ Cells	11		Stain 1 2+ Cells	8		Stain 1 2+ Cells	3		Stain 1 2+ Cells	9		Stain 1 2+ Cells	10		Stain 1 2+ Cells	7		Stain 1 2+ Cells	63
		Stain 1 3+ Cells	27		Stain 1 3+ Cells	13		Stain 1 3+ Cells	3		Stain 1 3+ Cells	4		Stain 1 3+ Cells	1		Stain 1 3+ Cells	14		Stain 1 3+ Cells	7		Stain 1 3+ Cells	32
		Stain 2 Positive Cells	0		Stain 2 Positive Cells	0		Stain 2 Positive Cells	0		Stain 2 Positive Cells	0		Stain 2 Positive Cells	0		Stain 2 Positive Cells	0		Stain 2 Positive Cells	0		Stain 2 Positive Cells	0
		Stain 2 0+ Cells	2909		Stain 2 0+ Cells	3573		Stain 2 0+ Cells	3036		Stain 2 0+ Cells	2950		Stain 2 0+ Cells	4101		Stain 2 0+ Cells	1977		Stain 2 0+ Cells	2789		Stain 2 0+ Cells	3123
		Stain 2 1+ Cells	0		Stain 2 1+ Cells	0		Stain 2 1+ Cells	0		Stain 2 1+ Cells	0		Stain 2 1+ Cells	0		Stain 2 1+ Cells	0		Stain 2 1+ Cells	0		Stain 2 1+ Cells	0
		Stain 2 2+ Cells	0		Stain 2 2+ Cells	0		Stain 2 2+ Cells	0		Stain 2 2+ Cells	0		Stain 2 2+ Cells	0		Stain 2 2+ Cells	0		Stain 2 2+ Cells	0		Stain 2 2+ Cells	0
		Stain 2 3+ Cells	0		Stain 2 3+ Cells	0		Stain 2 3+ Cells	0		Stain 2 3+ Cells	0		Stain 2 3+ Cells	0		Stain 2 3+ Cells	0		Stain 2 3+ Cells	0		Stain 2 3+ Cells	0
		Dual Positive Cells	0		Dual Positive Cells	0		Dual Positive Cells	0		Dual Positive Cells	0		Dual Positive Cells	0		Dual Positive Cells	0		Dual Positive Cells	0		Dual Positive Cells	0
		Dual Negative Cells	2807		Dual Negative Cells	3535		Dual Negative Cells	3016		Dual Negative Cells	2928		Dual Negative Cells	4058		Dual Negative Cells	1932		Dual Negative Cells	2765		Dual Negative Cells	2932
		% Stain 1 Positive Cells	3.50636		% Stain 1 Positive Cells	1.06353		% Stain 1 Positive Cells	0.658762		% Stain 1 Positive Cells	0.745763		% Stain 1 Positive Cells	1.04852		% Stain 1 Positive Cells	2.27618		% Stain 1 Positive Cells	0.860523		% Stain 1 Positive Cells	6.11591
		% Stain 1 0+ Cells	96.4936		% Stain 1 0+ Cells	98.9365		% Stain 1 0+ Cells	99.3412		% Stain 1 0+ Cells	99.2542		% Stain 1 0+ Cells	98.9515		% Stain 1 0+ Cells	97.7238		% Stain 1 0+ Cells	99.1395		% Stain 1 0+ Cells	93.8841
		% Stain 1 1+ Cells	1.7188		% Stain 1 1+ Cells	0.391828		% Stain 1 1+ Cells	0.296443		% Stain 1 1+ Cells	0.508475		% Stain 1 1+ Cells	0.804682		% Stain 1 1+ Cells	1.06222		% Stain 1 1+ Cells	0.358551		% Stain 1 1+ Cells	3.07397
		% Stain 1 2+ Cells	0.859402		% Stain 1 2+ Cells	0.307865		% Stain 1 2+ Cells	0.263505		% Stain 1 2+ Cells	0.101695		% Stain 1 2+ Cells	0.219459		% Stain 1 2+ Cells	0.505817		% Stain 1 2+ Cells	0.250986		% Stain 1 2+ Cells	2.01729
		% Stain 1 3+ Cells	0.928154		% Stain 1 3+ Cells	0.36384		% Stain 1 3+ Cells	0.0988142		% Stain 1 3+ Cells	0.135593		% Stain 1 3+ Cells	0.0243843		% Stain 1 3+ Cells	0.708144		% Stain 1 3+ Cells	0.250986		% Stain 1 3+ Cells	1.02466
		Stain 1 H-Score	6.22207		Stain 1 H-Score	2.09908		Stain 1 H-Score	1.11989		Stain 1 H-Score	1.11864		Stain 1 H-Score	1.31675		Stain 1 H-Score	4.19828		Stain 1 H-Score	1.61348		Stain 1 H-Score	10.1825
		% Stain 2 Positive Cells	0		% Stain 2 Positive Cells	0		% Stain 2 Positive Cells	0		% Stain 2 Positive Cells	0		% Stain 2 Positive Cells	0		% Stain 2 Positive Cells	0		% Stain 2 Positive Cells	0		% Stain 2 Positive Cells	0
		% Stain 2 0+ Cells	100		% Stain 2 0+ Cells	100		% Stain 2 0+ Cells	100		% Stain 2 0+ Cells	100		% Stain 2 0+ Cells	100		% Stain 2 0+ Cells	100		% Stain 2 0+ Cells	100		% Stain 2 0+ Cells	100
		% Stain 2 1+ Cells	0		% Stain 2 1+ Cells	0		% Stain 2 1+ Cells	0		% Stain 2 1+ Cells	0		% Stain 2 1+ Cells	0		% Stain 2 1+ Cells	0		% Stain 2 1+ Cells	0		% Stain 2 1+ Cells	0
		% Stain 2 2+ Cells	0		% Stain 2 2+ Cells	0		% Stain 2 2+ Cells	0		% Stain 2 2+ Cells	0		% Stain 2 2+ Cells	0		% Stain 2 2+ Cells	0		% Stain 2 2+ Cells	0		% Stain 2 2+ Cells	0
		% Stain 2 3+ Cells	0		% Stain 2 3+ Cells	0		% Stain 2 3+ Cells	0		% Stain 2 3+ Cells	0		% Stain 2 3+ Cells	0		% Stain 2 3+ Cells	0		% Stain 2 3+ Cells	0		% Stain 2 3+ Cells	0
		Stain 2 H-Score	0		Stain 2 H-Score	0		Stain 2 H-Score	0		Stain 2 H-Score	0		Stain 2 H-Score	0		Stain 2 H-Score	0		Stain 2 H-Score	0		Stain 2 H-Score	0
		% Dual Positive Cells	0		% Dual Positive Cells	0		% Dual Positive Cells	0		% Dual Positive Cells	0		% Dual Positive Cells	0		% Dual Positive Cells	0		% Dual Positive Cells	0		% Dual Positive Cells	0
		% Dual Negative Cells	96.4936		% Dual Negative Cells	98.9365		% Dual Negative Cells	99.3412		% Dual Negative Cells	99.2542		% Dual Negative Cells	98.9515		% Dual Negative Cells	97.7238		% Dual Negative Cells	99.1395		% Dual Negative Cells	93.8841
		Avg Stain 1 Nuclear OD	0.0472681		Avg Stain 1 Nuclear OD	0.0334986		Avg Stain 1 Nuclear OD	0.03202		Avg Stain 1 Nuclear OD	0.0315586		Avg Stain 1 Nuclear OD	0.0329882		Avg Stain 1 Nuclear OD	0.041316		Avg Stain 1 Nuclear OD	0.0324214		Avg Stain 1 Nuclear OD	0.0622933
		Avg Stain 2 Nuclear OD	0.0383501		Avg Stain 2 Nuclear OD	0.0372923		Avg Stain 2 Nuclear OD	0.0373156		Avg Stain 2 Nuclear OD	0.0370643		Avg Stain 2 Nuclear OD	0.0370552		Avg Stain 2 Nuclear OD	0.0381271		Avg Stain 2 Nuclear OD	0.037735		Avg Stain 2 Nuclear OD	0.0375665
		Avg Stain 1 Cytoplasmic OD	0.0328007		Avg Stain 1 Cytoplasmic OD	0.0295502		Avg Stain 1 Cytoplasmic OD	0.0291742		Avg Stain 1 Cytoplasmic OD	0.0292175		Avg Stain 1 Cytoplasmic OD	0.0294888		Avg Stain 1 Cytoplasmic OD	0.0309949		Avg Stain 1 Cytoplasmic OD	0.0296302		Avg Stain 1 Cytoplasmic OD	0.0362449
		Avg Stain 2 Cytoplasmic OD	0.0322888		Avg Stain 2 Cytoplasmic OD	0.032497		Avg Stain 2 Cytoplasmic OD	0.0323636		Avg Stain 2 Cytoplasmic OD	0.03225		Avg Stain 2 Cytoplasmic OD	0.0319435		Avg Stain 2 Cytoplasmic OD	0.0323931		Avg Stain 2 Cytoplasmic OD	0.0326007		Avg Stain 2 Cytoplasmic OD	0.0318033
		Avg Cell Area (µm²)	97.6594		Avg Cell Area (µm²)	81.1622		Avg Cell Area (µm²)	84.3822		Avg Cell Area (µm²)	88.0986		Avg Cell Area (µm²)	85.6042		Avg Cell Area (µm²)	94.7824		Avg Cell Area (µm²)	87.2831		Avg Cell Area (µm²)	97.2339
		Avg Cytoplasm Area (µm²)	63.9241		Avg Cytoplasm Area (µm²)	55.7516		Avg Cytoplasm Area (µm²)	57.2354		Avg Cytoplasm Area (µm²)	56.6869		Avg Cytoplasm Area (µm²)	54.2263		Avg Cytoplasm Area (µm²)	64.2217		Avg Cytoplasm Area (µm²)	60.0159		Avg Cytoplasm Area (µm²)	63.9409
		Avg Nucleus Area (µm²)	33.7353		Avg Nucleus Area (µm²)	25.4107		Avg Nucleus Area (µm²)	27.1468		Avg Nucleus Area (µm²)	31.4117		Avg Nucleus Area (µm²)	31.3778		Avg Nucleus Area (µm²)	30.5607		Avg Nucleus Area (µm²)	27.2672		Avg Nucleus Area (µm²)	33.293
		Avg Nucleus Perimeter (µm)	13.1508		Avg Nucleus Perimeter (µm)	10.0846		Avg Nucleus Perimeter (µm)	10.7699		Avg Nucleus Perimeter (µm)	12.4335		Avg Nucleus Perimeter (µm)	12.4327		Avg Nucleus Perimeter (µm)	12.0496		Avg Nucleus Perimeter (µm)	10.7976		Avg Nucleus Perimeter (µm)	13.1154
		Avg Nucleus Roundness	0.668407		Avg Nucleus Roundness	0.667911		Avg Nucleus Roundness	0.670971		Avg Nucleus Roundness	0.664205		Avg Nucleus Roundness	0.665177		Avg Nucleus Roundness	0.676273		Avg Nucleus Roundness	0.66943		Avg Nucleus Roundness	0.675052
		Tissue Area (µm²)	533906		Tissue Area (µm²)	550478		Tissue Area (µm²)	495411		Tissue Area (µm²)	484234		Tissue Area (µm²)	654180		Tissue Area (µm²)	355743		Tissue Area (µm²)	474582		Tissue Area (µm²)	591200
		Tumor: Total Cells	2909		Tumor: Total Cells	3573		Tumor: Total Cells	3036		Tumor: Total Cells	2950		Tumor: Total Cells	4101		Tumor: Total Cells	1977		Tumor: Total Cells	2789		Tumor: Total Cells	3123
		Tumor: Stain 1 Positive Cells	102		Tumor: Stain 1 Positive Cells	38		Tumor: Stain 1 Positive Cells	20		Tumor: Stain 1 Positive Cells	22		Tumor: Stain 1 Positive Cells	43		Tumor: Stain 1 Positive Cells	45		Tumor: Stain 1 Positive Cells	24		Tumor: Stain 1 Positive Cells	191
		Tumor: Stain 1 0+ Cells	2807		Tumor: Stain 1 0+ Cells	3535		Tumor: Stain 1 0+ Cells	3016		Tumor: Stain 1 0+ Cells	2928		Tumor: Stain 1 0+ Cells	4058		Tumor: Stain 1 0+ Cells	1932		Tumor: Stain 1 0+ Cells	2765		Tumor: Stain 1 0+ Cells	2932
		Tumor: Stain 1 1+ Cells	50		Tumor: Stain 1 1+ Cells	14		Tumor: Stain 1 1+ Cells	9		Tumor: Stain 1 1+ Cells	15		Tumor: Stain 1 1+ Cells	33		Tumor: Stain 1 1+ Cells	21		Tumor: Stain 1 1+ Cells	10		Tumor: Stain 1 1+ Cells	96
		Tumor: Stain 1 2+ Cells	25		Tumor: Stain 1 2+ Cells	11		Tumor: Stain 1 2+ Cells	8		Tumor: Stain 1 2+ Cells	3		Tumor: Stain 1 2+ Cells	9		Tumor: Stain 1 2+ Cells	10		Tumor: Stain 1 2+ Cells	7		Tumor: Stain 1 2+ Cells	63
		Tumor: Stain 1 3+ Cells	27		Tumor: Stain 1 3+ Cells	13		Tumor: Stain 1 3+ Cells	3		Tumor: Stain 1 3+ Cells	4		Tumor: Stain 1 3+ Cells	1		Tumor: Stain 1 3+ Cells	14		Tumor: Stain 1 3+ Cells	7		Tumor: Stain 1 3+ Cells	32
		Tumor: Stain 2 Positive Cells	0		Tumor: Stain 2 Positive Cells	0		Tumor: Stain 2 Positive Cells	0		Tumor: Stain 2 Positive Cells	0		Tumor: Stain 2 Positive Cells	0		Tumor: Stain 2 Positive Cells	0		Tumor: Stain 2 Positive Cells	0		Tumor: Stain 2 Positive Cells	0
		Tumor: Stain 2 0+ Cells	2909		Tumor: Stain 2 0+ Cells	3573		Tumor: Stain 2 0+ Cells	3036		Tumor: Stain 2 0+ Cells	2950		Tumor: Stain 2 0+ Cells	4101		Tumor: Stain 2 0+ Cells	1977		Tumor: Stain 2 0+ Cells	2789		Tumor: Stain 2 0+ Cells	3123
		Tumor: Stain 2 1+ Cells	0		Tumor: Stain 2 1+ Cells	0		Tumor: Stain 2 1+ Cells	0		Tumor: Stain 2 1+ Cells	0		Tumor: Stain 2 1+ Cells	0		Tumor: Stain 2 1+ Cells	0		Tumor: Stain 2 1+ Cells	0		Tumor: Stain 2 1+ Cells	0
		Tumor: Stain 2 2+ Cells	0		Tumor: Stain 2 2+ Cells	0		Tumor: Stain 2 2+ Cells	0		Tumor: Stain 2 2+ Cells	0		Tumor: Stain 2 2+ Cells	0		Tumor: Stain 2 2+ Cells	0		Tumor: Stain 2 2+ Cells	0		Tumor: Stain 2 2+ Cells	0
		Tumor: Stain 2 3+ Cells	0		Tumor: Stain 2 3+ Cells	0		Tumor: Stain 2 3+ Cells	0		Tumor: Stain 2 3+ Cells	0		Tumor: Stain 2 3+ Cells	0		Tumor: Stain 2 3+ Cells	0		Tumor: Stain 2 3+ Cells	0		Tumor: Stain 2 3+ Cells	0
		Tumor: Dual Positive Cells	0		Tumor: Dual Positive Cells	0		Tumor: Dual Positive Cells	0		Tumor: Dual Positive Cells	0		Tumor: Dual Positive Cells	0		Tumor: Dual Positive Cells	0		Tumor: Dual Positive Cells	0		Tumor: Dual Positive Cells	0
		Tumor: Dual Negative Cells	2807		Tumor: Dual Negative Cells	3535		Tumor: Dual Negative Cells	3016		Tumor: Dual Negative Cells	2928		Tumor: Dual Negative Cells	4058		Tumor: Dual Negative Cells	1932		Tumor: Dual Negative Cells	2765		Tumor: Dual Negative Cells	2932
		Tumor: % Stain 1 Positive Cells	3.50636		Tumor: % Stain 1 Positive Cells	1.06353		Tumor: % Stain 1 Positive Cells	0.658762		Tumor: % Stain 1 Positive Cells	0.745763		Tumor: % Stain 1 Positive Cells	1.04852		Tumor: % Stain 1 Positive Cells	2.27618		Tumor: % Stain 1 Positive Cells	0.860523		Tumor: % Stain 1 Positive Cells	6.11591		2.03444
		Tumor: % Stain 1 0+ Cells	96.4936		Tumor: % Stain 1 0+ Cells	98.9365		Tumor: % Stain 1 0+ Cells	99.3412		Tumor: % Stain 1 0+ Cells	99.2542		Tumor: % Stain 1 0+ Cells	98.9515		Tumor: % Stain 1 0+ Cells	97.7238		Tumor: % Stain 1 0+ Cells	99.1395		Tumor: % Stain 1 0+ Cells	93.8841
		Tumor: % Stain 1 1+ Cells	1.7188		Tumor: % Stain 1 1+ Cells	0.391828		Tumor: % Stain 1 1+ Cells	0.296443		Tumor: % Stain 1 1+ Cells	0.508475		Tumor: % Stain 1 1+ Cells	0.804682		Tumor: % Stain 1 1+ Cells	1.06222		Tumor: % Stain 1 1+ Cells	0.358551		Tumor: % Stain 1 1+ Cells	3.07397
		Tumor: % Stain 1 2+ Cells	0.859402		Tumor: % Stain 1 2+ Cells	0.307865		Tumor: % Stain 1 2+ Cells	0.263505		Tumor: % Stain 1 2+ Cells	0.101695		Tumor: % Stain 1 2+ Cells	0.219459		Tumor: % Stain 1 2+ Cells	0.505817		Tumor: % Stain 1 2+ Cells	0.250986		Tumor: % Stain 1 2+ Cells	2.01729
		Tumor: % Stain 1 3+ Cells	0.928154		Tumor: % Stain 1 3+ Cells	0.36384		Tumor: % Stain 1 3+ Cells	0.0988142		Tumor: % Stain 1 3+ Cells	0.135593		Tumor: % Stain 1 3+ Cells	0.0243843		Tumor: % Stain 1 3+ Cells	0.708144		Tumor: % Stain 1 3+ Cells	0.250986		Tumor: % Stain 1 3+ Cells	1.02466
		Tumor: Stain 1 H-Score	6.22207		Tumor: Stain 1 H-Score	2.09908		Tumor: Stain 1 H-Score	1.11989		Tumor: Stain 1 H-Score	1.11864		Tumor: Stain 1 H-Score	1.31675		Tumor: Stain 1 H-Score	4.19828		Tumor: Stain 1 H-Score	1.61348		Tumor: Stain 1 H-Score	10.1825
		Tumor: % Stain 2 Positive Cells	0		Tumor: % Stain 2 Positive Cells	0		Tumor: % Stain 2 Positive Cells	0		Tumor: % Stain 2 Positive Cells	0		Tumor: % Stain 2 Positive Cells	0		Tumor: % Stain 2 Positive Cells	0		Tumor: % Stain 2 Positive Cells	0		Tumor: % Stain 2 Positive Cells	0
		Tumor: % Stain 2 0+ Cells	100		Tumor: % Stain 2 0+ Cells	100		Tumor: % Stain 2 0+ Cells	100		Tumor: % Stain 2 0+ Cells	100		Tumor: % Stain 2 0+ Cells	100		Tumor: % Stain 2 0+ Cells	100		Tumor: % Stain 2 0+ Cells	100		Tumor: % Stain 2 0+ Cells	100
		Tumor: % Stain 2 1+ Cells	0		Tumor: % Stain 2 1+ Cells	0		Tumor: % Stain 2 1+ Cells	0		Tumor: % Stain 2 1+ Cells	0		Tumor: % Stain 2 1+ Cells	0		Tumor: % Stain 2 1+ Cells	0		Tumor: % Stain 2 1+ Cells	0		Tumor: % Stain 2 1+ Cells	0
		Tumor: % Stain 2 2+ Cells	0		Tumor: % Stain 2 2+ Cells	0		Tumor: % Stain 2 2+ Cells	0		Tumor: % Stain 2 2+ Cells	0		Tumor: % Stain 2 2+ Cells	0		Tumor: % Stain 2 2+ Cells	0		Tumor: % Stain 2 2+ Cells	0		Tumor: % Stain 2 2+ Cells	0
		Tumor: % Stain 2 3+ Cells	0		Tumor: % Stain 2 3+ Cells	0		Tumor: % Stain 2 3+ Cells	0		Tumor: % Stain 2 3+ Cells	0		Tumor: % Stain 2 3+ Cells	0		Tumor: % Stain 2 3+ Cells	0		Tumor: % Stain 2 3+ Cells	0		Tumor: % Stain 2 3+ Cells	0
		Tumor: Stain 2 H-Score	0		Tumor: Stain 2 H-Score	0		Tumor: Stain 2 H-Score	0		Tumor: Stain 2 H-Score	0		Tumor: Stain 2 H-Score	0		Tumor: Stain 2 H-Score	0		Tumor: Stain 2 H-Score	0		Tumor: Stain 2 H-Score	0
		Tumor: % Dual Positive Cells	0		Tumor: % Dual Positive Cells	0		Tumor: % Dual Positive Cells	0		Tumor: % Dual Positive Cells	0		Tumor: % Dual Positive Cells	0		Tumor: % Dual Positive Cells	0		Tumor: % Dual Positive Cells	0		Tumor: % Dual Positive Cells	0
		Tumor: % Dual Negative Cells	96.4936		Tumor: % Dual Negative Cells	98.9365		Tumor: % Dual Negative Cells	99.3412		Tumor: % Dual Negative Cells	99.2542		Tumor: % Dual Negative Cells	98.9515		Tumor: % Dual Negative Cells	97.7238		Tumor: % Dual Negative Cells	99.1395		Tumor: % Dual Negative Cells	93.8841
		Tumor: Avg Stain 1 Nuclear OD	0.0472681		Tumor: Avg Stain 1 Nuclear OD	0.0334986		Tumor: Avg Stain 1 Nuclear OD	0.03202		Tumor: Avg Stain 1 Nuclear OD	0.0315586		Tumor: Avg Stain 1 Nuclear OD	0.0329882		Tumor: Avg Stain 1 Nuclear OD	0.041316		Tumor: Avg Stain 1 Nuclear OD	0.0324214		Tumor: Avg Stain 1 Nuclear OD	0.0622933
		Tumor: Avg Stain 2 Nuclear OD	0.0383501		Tumor: Avg Stain 2 Nuclear OD	0.0372923		Tumor: Avg Stain 2 Nuclear OD	0.0373156		Tumor: Avg Stain 2 Nuclear OD	0.0370643		Tumor: Avg Stain 2 Nuclear OD	0.0370552		Tumor: Avg Stain 2 Nuclear OD	0.0381271		Tumor: Avg Stain 2 Nuclear OD	0.037735		Tumor: Avg Stain 2 Nuclear OD	0.0375665
		Tumor: Avg Stain 1 Cytoplasmic OD	0.0328007		Tumor: Avg Stain 1 Cytoplasmic OD	0.0295502		Tumor: Avg Stain 1 Cytoplasmic OD	0.0291742		Tumor: Avg Stain 1 Cytoplasmic OD	0.0292175		Tumor: Avg Stain 1 Cytoplasmic OD	0.0294888		Tumor: Avg Stain 1 Cytoplasmic OD	0.0309949		Tumor: Avg Stain 1 Cytoplasmic OD	0.0296302		Tumor: Avg Stain 1 Cytoplasmic OD	0.0362449
		Tumor: Avg Stain 2 Cytoplasmic OD	0.0322888		Tumor: Avg Stain 2 Cytoplasmic OD	0.032497		Tumor: Avg Stain 2 Cytoplasmic OD	0.0323636		Tumor: Avg Stain 2 Cytoplasmic OD	0.03225		Tumor: Avg Stain 2 Cytoplasmic OD	0.0319435		Tumor: Avg Stain 2 Cytoplasmic OD	0.0323931		Tumor: Avg Stain 2 Cytoplasmic OD	0.0326007		Tumor: Avg Stain 2 Cytoplasmic OD	0.0318033
		Tumor: Avg Cell Area (µm²)	97.6594		Tumor: Avg Cell Area (µm²)	81.1622		Tumor: Avg Cell Area (µm²)	84.3822		Tumor: Avg Cell Area (µm²)	88.0986		Tumor: Avg Cell Area (µm²)	85.6042		Tumor: Avg Cell Area (µm²)	94.7824		Tumor: Avg Cell Area (µm²)	87.2831		Tumor: Avg Cell Area (µm²)	97.2339
		Tumor: Avg Cytoplasm Area (µm²)	63.9241		Tumor: Avg Cytoplasm Area (µm²)	55.7516		Tumor: Avg Cytoplasm Area (µm²)	57.2354		Tumor: Avg Cytoplasm Area (µm²)	56.6869		Tumor: Avg Cytoplasm Area (µm²)	54.2263		Tumor: Avg Cytoplasm Area (µm²)	64.2217		Tumor: Avg Cytoplasm Area (µm²)	60.0159		Tumor: Avg Cytoplasm Area (µm²)	63.9409
		Tumor: Avg Nucleus Area (µm²)	33.7353		Tumor: Avg Nucleus Area (µm²)	25.4107		Tumor: Avg Nucleus Area (µm²)	27.1468		Tumor: Avg Nucleus Area (µm²)	31.4117		Tumor: Avg Nucleus Area (µm²)	31.3778		Tumor: Avg Nucleus Area (µm²)	30.5607		Tumor: Avg Nucleus Area (µm²)	27.2672		Tumor: Avg Nucleus Area (µm²)	33.293
		Tumor: Avg Nucleus Perimeter (µm)	13.1508		Tumor: Avg Nucleus Perimeter (µm)	10.0846		Tumor: Avg Nucleus Perimeter (µm)	10.7699		Tumor: Avg Nucleus Perimeter (µm)	12.4335		Tumor: Avg Nucleus Perimeter (µm)	12.4327		Tumor: Avg Nucleus Perimeter (µm)	12.0496		Tumor: Avg Nucleus Perimeter (µm)	10.7976		Tumor: Avg Nucleus Perimeter (µm)	13.1154
		Tumor: Avg Nucleus Roundness	0.668407		Tumor: Avg Nucleus Roundness	0.667911		Tumor: Avg Nucleus Roundness	0.670971		Tumor: Avg Nucleus Roundness	0.664205		Tumor: Avg Nucleus Roundness	0.665177		Tumor: Avg Nucleus Roundness	0.676273		Tumor: Avg Nucleus Roundness	0.66943		Tumor: Avg Nucleus Roundness	0.675052
		Tumor: Tissue Area (µm²)	533906		Tumor: Tissue Area (µm²)	550478		Tumor: Tissue Area (µm²)	495411		Tumor: Tissue Area (µm²)	484234		Tumor: Tissue Area (µm²)	654180		Tumor: Tissue Area (µm²)	355743		Tumor: Tissue Area (µm²)	474582		Tumor: Tissue Area (µm²)	591200
		BSNA9.1d	HOM
		Name	Value		Name	Value		Name	Value		Name	Value		Name	Value		Name	Value		Name	Value		Name	Value
		Classified Area (mm²)	0.68174		Classified Area (mm²)	0.75812		Classified Area (mm²)	0.86794		Classified Area (mm²)	0.87508		Classified Area (mm²)	0.90905		Classified Area (mm²)	1.30794		Classified Area (mm²)	0.81678		Classified Area (mm²)	0.69335
		Tumor Area (mm²)	0.57827		Tumor Area (mm²)	0.74264		Tumor Area (mm²)	0.8459		Tumor Area (mm²)	0.79746		Tumor Area (mm²)	0.88281		Tumor Area (mm²)	1.22178		Tumor Area (mm²)	0.77689		Tumor Area (mm²)	0.67969
		Necrosis Area (mm²)	0		Necrosis Area (mm²)	0.00038		Necrosis Area (mm²)	0.00089		Necrosis Area (mm²)	0.00053		Necrosis Area (mm²)	0		Necrosis Area (mm²)	0.00067		Necrosis Area (mm²)	0		Necrosis Area (mm²)	0.0008
		Empty Area (mm²)	0.00336		Empty Area (mm²)	0.00744		Empty Area (mm²)	0.01081		Empty Area (mm²)	0.0568		Empty Area (mm²)	0.02254		Empty Area (mm²)	0.0687		Empty Area (mm²)	0.01033		Empty Area (mm²)	0.00013
		Normal Area (mm²)	0.10011		Normal Area (mm²)	0.00766		Normal Area (mm²)	0.01034		Normal Area (mm²)	0.02028		Normal Area (mm²)	0.0037		Normal Area (mm²)	0.01678		Normal Area (mm²)	0.02957		Normal Area (mm²)	0.01273
		Total Cells	2714		Total Cells	2729		Total Cells	2771		Total Cells	2659		Total Cells	3161		Total Cells	6239		Total Cells	4158		Total Cells	3809
		Stain 1 Positive Cells	187		Stain 1 Positive Cells	75		Stain 1 Positive Cells	76		Stain 1 Positive Cells	153		Stain 1 Positive Cells	105		Stain 1 Positive Cells	44		Stain 1 Positive Cells	20		Stain 1 Positive Cells	17
		Stain 1 0+ Cells	2527		Stain 1 0+ Cells	2654		Stain 1 0+ Cells	2695		Stain 1 0+ Cells	2506		Stain 1 0+ Cells	3056		Stain 1 0+ Cells	6195		Stain 1 0+ Cells	4138		Stain 1 0+ Cells	3792
		Stain 1 1+ Cells	75		Stain 1 1+ Cells	34		Stain 1 1+ Cells	37		Stain 1 1+ Cells	82		Stain 1 1+ Cells	70		Stain 1 1+ Cells	20		Stain 1 1+ Cells	10		Stain 1 1+ Cells	6
		Stain 1 2+ Cells	57		Stain 1 2+ Cells	20		Stain 1 2+ Cells	20		Stain 1 2+ Cells	35		Stain 1 2+ Cells	26		Stain 1 2+ Cells	16		Stain 1 2+ Cells	6		Stain 1 2+ Cells	9
		Stain 1 3+ Cells	55		Stain 1 3+ Cells	21		Stain 1 3+ Cells	19		Stain 1 3+ Cells	36		Stain 1 3+ Cells	9		Stain 1 3+ Cells	8		Stain 1 3+ Cells	4		Stain 1 3+ Cells	2
		Stain 2 Positive Cells	0		Stain 2 Positive Cells	0		Stain 2 Positive Cells	0		Stain 2 Positive Cells	0		Stain 2 Positive Cells	0		Stain 2 Positive Cells	0		Stain 2 Positive Cells	0		Stain 2 Positive Cells	0
		Stain 2 0+ Cells	2714		Stain 2 0+ Cells	2729		Stain 2 0+ Cells	2771		Stain 2 0+ Cells	2659		Stain 2 0+ Cells	3161		Stain 2 0+ Cells	6239		Stain 2 0+ Cells	4158		Stain 2 0+ Cells	3809
		Stain 2 1+ Cells	0		Stain 2 1+ Cells	0		Stain 2 1+ Cells	0		Stain 2 1+ Cells	0		Stain 2 1+ Cells	0		Stain 2 1+ Cells	0		Stain 2 1+ Cells	0		Stain 2 1+ Cells	0
		Stain 2 2+ Cells	0		Stain 2 2+ Cells	0		Stain 2 2+ Cells	0		Stain 2 2+ Cells	0		Stain 2 2+ Cells	0		Stain 2 2+ Cells	0		Stain 2 2+ Cells	0		Stain 2 2+ Cells	0
		Stain 2 3+ Cells	0		Stain 2 3+ Cells	0		Stain 2 3+ Cells	0		Stain 2 3+ Cells	0		Stain 2 3+ Cells	0		Stain 2 3+ Cells	0		Stain 2 3+ Cells	0		Stain 2 3+ Cells	0
		Dual Positive Cells	0		Dual Positive Cells	0		Dual Positive Cells	0		Dual Positive Cells	0		Dual Positive Cells	0		Dual Positive Cells	0		Dual Positive Cells	0		Dual Positive Cells	0
		Dual Negative Cells	2527		Dual Negative Cells	2654		Dual Negative Cells	2695		Dual Negative Cells	2506		Dual Negative Cells	3056		Dual Negative Cells	6195		Dual Negative Cells	4138		Dual Negative Cells	3792
		% Stain 1 Positive Cells	6.8902		% Stain 1 Positive Cells	2.74826		% Stain 1 Positive Cells	2.74269		% Stain 1 Positive Cells	5.75404		% Stain 1 Positive Cells	3.32173		% Stain 1 Positive Cells	0.705241		% Stain 1 Positive Cells	0.481		% Stain 1 Positive Cells	0.446311		2.88618
		% Stain 1 0+ Cells	93.1098		% Stain 1 0+ Cells	97.2517		% Stain 1 0+ Cells	97.2573		% Stain 1 0+ Cells	94.246		% Stain 1 0+ Cells	96.6783		% Stain 1 0+ Cells	99.2948		% Stain 1 0+ Cells	99.519		% Stain 1 0+ Cells	99.5537
		% Stain 1 1+ Cells	2.76345		% Stain 1 1+ Cells	1.24588		% Stain 1 1+ Cells	1.33526		% Stain 1 1+ Cells	3.08387		% Stain 1 1+ Cells	2.21449		% Stain 1 1+ Cells	0.320564		% Stain 1 1+ Cells	0.2405		% Stain 1 1+ Cells	0.157522
		% Stain 1 2+ Cells	2.10022		% Stain 1 2+ Cells	0.732869		% Stain 1 2+ Cells	0.721761		% Stain 1 2+ Cells	1.31628		% Stain 1 2+ Cells	0.822525		% Stain 1 2+ Cells	0.256451		% Stain 1 2+ Cells	0.1443		% Stain 1 2+ Cells	0.236282
		% Stain 1 3+ Cells	2.02653		% Stain 1 3+ Cells	0.769513		% Stain 1 3+ Cells	0.685673		% Stain 1 3+ Cells	1.35389		% Stain 1 3+ Cells	0.28472		% Stain 1 3+ Cells	0.128226		% Stain 1 3+ Cells	0.0962001		% Stain 1 3+ Cells	0.0525072
		Stain 1 H-Score	13.0435		Stain 1 H-Score	5.02015		Stain 1 H-Score	4.8358		Stain 1 H-Score	9.77811		Stain 1 H-Score	4.7137		Stain 1 H-Score	1.21814		Stain 1 H-Score	0.817701		Stain 1 H-Score	0.787608
		% Stain 2 Positive Cells	0		% Stain 2 Positive Cells	0		% Stain 2 Positive Cells	0		% Stain 2 Positive Cells	0		% Stain 2 Positive Cells	0		% Stain 2 Positive Cells	0		% Stain 2 Positive Cells	0		% Stain 2 Positive Cells	0
		% Stain 2 0+ Cells	100		% Stain 2 0+ Cells	100		% Stain 2 0+ Cells	100		% Stain 2 0+ Cells	100		% Stain 2 0+ Cells	100		% Stain 2 0+ Cells	100		% Stain 2 0+ Cells	100		% Stain 2 0+ Cells	100
		% Stain 2 1+ Cells	0		% Stain 2 1+ Cells	0		% Stain 2 1+ Cells	0		% Stain 2 1+ Cells	0		% Stain 2 1+ Cells	0		% Stain 2 1+ Cells	0		% Stain 2 1+ Cells	0		% Stain 2 1+ Cells	0
		% Stain 2 2+ Cells	0		% Stain 2 2+ Cells	0		% Stain 2 2+ Cells	0		% Stain 2 2+ Cells	0		% Stain 2 2+ Cells	0		% Stain 2 2+ Cells	0		% Stain 2 2+ Cells	0		% Stain 2 2+ Cells	0
		% Stain 2 3+ Cells	0		% Stain 2 3+ Cells	0		% Stain 2 3+ Cells	0		% Stain 2 3+ Cells	0		% Stain 2 3+ Cells	0		% Stain 2 3+ Cells	0		% Stain 2 3+ Cells	0		% Stain 2 3+ Cells	0
		Stain 2 H-Score	0		Stain 2 H-Score	0		Stain 2 H-Score	0		Stain 2 H-Score	0		Stain 2 H-Score	0		Stain 2 H-Score	0		Stain 2 H-Score	0		Stain 2 H-Score	0
		% Dual Positive Cells	0		% Dual Positive Cells	0		% Dual Positive Cells	0		% Dual Positive Cells	0		% Dual Positive Cells	0		% Dual Positive Cells	0		% Dual Positive Cells	0		% Dual Positive Cells	0
		% Dual Negative Cells	93.1098		% Dual Negative Cells	97.2517		% Dual Negative Cells	97.2573		% Dual Negative Cells	94.246		% Dual Negative Cells	96.6783		% Dual Negative Cells	99.2948		% Dual Negative Cells	99.519		% Dual Negative Cells	99.5537
		Avg Stain 1 Nuclear OD	0.0691084		Avg Stain 1 Nuclear OD	0.0456599		Avg Stain 1 Nuclear OD	0.0469803		Avg Stain 1 Nuclear OD	0.0632467		Avg Stain 1 Nuclear OD	0.0448237		Avg Stain 1 Nuclear OD	0.0312507		Avg Stain 1 Nuclear OD	0.0310013		Avg Stain 1 Nuclear OD	0.0306032
		Avg Stain 2 Nuclear OD	0.039584		Avg Stain 2 Nuclear OD	0.0375896		Avg Stain 2 Nuclear OD	0.037326		Avg Stain 2 Nuclear OD	0.0386051		Avg Stain 2 Nuclear OD	0.0370393		Avg Stain 2 Nuclear OD	0.03715		Avg Stain 2 Nuclear OD	0.0367547		Avg Stain 2 Nuclear OD	0.0367664
		Avg Stain 1 Cytoplasmic OD	0.0381352		Avg Stain 1 Cytoplasmic OD	0.0326957		Avg Stain 1 Cytoplasmic OD	0.0328962		Avg Stain 1 Cytoplasmic OD	0.0381899		Avg Stain 1 Cytoplasmic OD	0.031821		Avg Stain 1 Cytoplasmic OD	0.0294608		Avg Stain 1 Cytoplasmic OD	0.0295773		Avg Stain 1 Cytoplasmic OD	0.0297041
		Avg Stain 2 Cytoplasmic OD	0.032283		Avg Stain 2 Cytoplasmic OD	0.0321247		Avg Stain 2 Cytoplasmic OD	0.0318961		Avg Stain 2 Cytoplasmic OD	0.0321062		Avg Stain 2 Cytoplasmic OD	0.0324312		Avg Stain 2 Cytoplasmic OD	0.032341		Avg Stain 2 Cytoplasmic OD	0.0322214		Avg Stain 2 Cytoplasmic OD	0.0322544
		Avg Cell Area (µm²)	103.921		Avg Cell Area (µm²)	112.157		Avg Cell Area (µm²)	122.241		Avg Cell Area (µm²)	125.358		Avg Cell Area (µm²)	91.2505		Avg Cell Area (µm²)	83.7487		Avg Cell Area (µm²)	90.3299		Avg Cell Area (µm²)	85.9643
		Avg Cytoplasm Area (µm²)	70.1345		Avg Cytoplasm Area (µm²)	76.5378		Avg Cytoplasm Area (µm²)	85.2912		Avg Cytoplasm Area (µm²)	82.8987		Avg Cytoplasm Area (µm²)	64.5749		Avg Cytoplasm Area (µm²)	57.5019		Avg Cytoplasm Area (µm²)	63.1701		Avg Cytoplasm Area (µm²)	61.1499
		Avg Nucleus Area (µm²)	33.7866		Avg Nucleus Area (µm²)	35.6197		Avg Nucleus Area (µm²)	36.9493		Avg Nucleus Area (µm²)	42.4592		Avg Nucleus Area (µm²)	26.6756		Avg Nucleus Area (µm²)	26.2468		Avg Nucleus Area (µm²)	27.1598		Avg Nucleus Area (µm²)	24.8143
		Avg Nucleus Perimeter (µm)	13.2163		Avg Nucleus Perimeter (µm)	13.9159		Avg Nucleus Perimeter (µm)	14.4111		Avg Nucleus Perimeter (µm)	16.2241		Avg Nucleus Perimeter (µm)	10.5803		Avg Nucleus Perimeter (µm)	10.4139		Avg Nucleus Perimeter (µm)	10.7556		Avg Nucleus Perimeter (µm)	9.8606
		Avg Nucleus Roundness	0.676987		Avg Nucleus Roundness	0.681786		Avg Nucleus Roundness	0.689887		Avg Nucleus Roundness	0.684458		Avg Nucleus Roundness	0.678663		Avg Nucleus Roundness	0.671524		Avg Nucleus Roundness	0.676422		Avg Nucleus Roundness	0.675228
		Tissue Area (µm²)	561421		Tissue Area (µm²)	634129		Tissue Area (µm²)	748533		Tissue Area (µm²)	667912		Tissue Area (µm²)	583066		Tissue Area (µm²)	1005330		Tissue Area (µm²)	756295		Tissue Area (µm²)	666729
		Tumor: Total Cells	2714		Tumor: Total Cells	2729		Tumor: Total Cells	2771		Tumor: Total Cells	2659		Tumor: Total Cells	3161		Tumor: Total Cells	6239		Tumor: Total Cells	4158		Tumor: Total Cells	3809
		Tumor: Stain 1 Positive Cells	187		Tumor: Stain 1 Positive Cells	75		Tumor: Stain 1 Positive Cells	76		Tumor: Stain 1 Positive Cells	153		Tumor: Stain 1 Positive Cells	105		Tumor: Stain 1 Positive Cells	44		Tumor: Stain 1 Positive Cells	20		Tumor: Stain 1 Positive Cells	17
		Tumor: Stain 1 0+ Cells	2527		Tumor: Stain 1 0+ Cells	2654		Tumor: Stain 1 0+ Cells	2695		Tumor: Stain 1 0+ Cells	2506		Tumor: Stain 1 0+ Cells	3056		Tumor: Stain 1 0+ Cells	6195		Tumor: Stain 1 0+ Cells	4138		Tumor: Stain 1 0+ Cells	3792
		Tumor: Stain 1 1+ Cells	75		Tumor: Stain 1 1+ Cells	34		Tumor: Stain 1 1+ Cells	37		Tumor: Stain 1 1+ Cells	82		Tumor: Stain 1 1+ Cells	70		Tumor: Stain 1 1+ Cells	20		Tumor: Stain 1 1+ Cells	10		Tumor: Stain 1 1+ Cells	6
		Tumor: Stain 1 2+ Cells	57		Tumor: Stain 1 2+ Cells	20		Tumor: Stain 1 2+ Cells	20		Tumor: Stain 1 2+ Cells	35		Tumor: Stain 1 2+ Cells	26		Tumor: Stain 1 2+ Cells	16		Tumor: Stain 1 2+ Cells	6		Tumor: Stain 1 2+ Cells	9
		Tumor: Stain 1 3+ Cells	55		Tumor: Stain 1 3+ Cells	21		Tumor: Stain 1 3+ Cells	19		Tumor: Stain 1 3+ Cells	36		Tumor: Stain 1 3+ Cells	9		Tumor: Stain 1 3+ Cells	8		Tumor: Stain 1 3+ Cells	4		Tumor: Stain 1 3+ Cells	2
		Tumor: Stain 2 Positive Cells	0		Tumor: Stain 2 Positive Cells	0		Tumor: Stain 2 Positive Cells	0		Tumor: Stain 2 Positive Cells	0		Tumor: Stain 2 Positive Cells	0		Tumor: Stain 2 Positive Cells	0		Tumor: Stain 2 Positive Cells	0		Tumor: Stain 2 Positive Cells	0
		Tumor: Stain 2 0+ Cells	2714		Tumor: Stain 2 0+ Cells	2729		Tumor: Stain 2 0+ Cells	2771		Tumor: Stain 2 0+ Cells	2659		Tumor: Stain 2 0+ Cells	3161		Tumor: Stain 2 0+ Cells	6239		Tumor: Stain 2 0+ Cells	4158		Tumor: Stain 2 0+ Cells	3809
		Tumor: Stain 2 1+ Cells	0		Tumor: Stain 2 1+ Cells	0		Tumor: Stain 2 1+ Cells	0		Tumor: Stain 2 1+ Cells	0		Tumor: Stain 2 1+ Cells	0		Tumor: Stain 2 1+ Cells	0		Tumor: Stain 2 1+ Cells	0		Tumor: Stain 2 1+ Cells	0
		Tumor: Stain 2 2+ Cells	0		Tumor: Stain 2 2+ Cells	0		Tumor: Stain 2 2+ Cells	0		Tumor: Stain 2 2+ Cells	0		Tumor: Stain 2 2+ Cells	0		Tumor: Stain 2 2+ Cells	0		Tumor: Stain 2 2+ Cells	0		Tumor: Stain 2 2+ Cells	0
		Tumor: Stain 2 3+ Cells	0		Tumor: Stain 2 3+ Cells	0		Tumor: Stain 2 3+ Cells	0		Tumor: Stain 2 3+ Cells	0		Tumor: Stain 2 3+ Cells	0		Tumor: Stain 2 3+ Cells	0		Tumor: Stain 2 3+ Cells	0		Tumor: Stain 2 3+ Cells	0
		Tumor: Dual Positive Cells	0		Tumor: Dual Positive Cells	0		Tumor: Dual Positive Cells	0		Tumor: Dual Positive Cells	0		Tumor: Dual Positive Cells	0		Tumor: Dual Positive Cells	0		Tumor: Dual Positive Cells	0		Tumor: Dual Positive Cells	0
		Tumor: Dual Negative Cells	2527		Tumor: Dual Negative Cells	2654		Tumor: Dual Negative Cells	2695		Tumor: Dual Negative Cells	2506		Tumor: Dual Negative Cells	3056		Tumor: Dual Negative Cells	6195		Tumor: Dual Negative Cells	4138		Tumor: Dual Negative Cells	3792
		Tumor: % Stain 1 Positive Cells	6.8902		Tumor: % Stain 1 Positive Cells	2.74826		Tumor: % Stain 1 Positive Cells	2.74269		Tumor: % Stain 1 Positive Cells	5.75404		Tumor: % Stain 1 Positive Cells	3.32173		Tumor: % Stain 1 Positive Cells	0.705241		Tumor: % Stain 1 Positive Cells	0.481		Tumor: % Stain 1 Positive Cells	0.446311
		Tumor: % Stain 1 0+ Cells	93.1098		Tumor: % Stain 1 0+ Cells	97.2517		Tumor: % Stain 1 0+ Cells	97.2573		Tumor: % Stain 1 0+ Cells	94.246		Tumor: % Stain 1 0+ Cells	96.6783		Tumor: % Stain 1 0+ Cells	99.2948		Tumor: % Stain 1 0+ Cells	99.519		Tumor: % Stain 1 0+ Cells	99.5537
		Tumor: % Stain 1 1+ Cells	2.76345		Tumor: % Stain 1 1+ Cells	1.24588		Tumor: % Stain 1 1+ Cells	1.33526		Tumor: % Stain 1 1+ Cells	3.08387		Tumor: % Stain 1 1+ Cells	2.21449		Tumor: % Stain 1 1+ Cells	0.320564		Tumor: % Stain 1 1+ Cells	0.2405		Tumor: % Stain 1 1+ Cells	0.157522
		Tumor: % Stain 1 2+ Cells	2.10022		Tumor: % Stain 1 2+ Cells	0.732869		Tumor: % Stain 1 2+ Cells	0.721761		Tumor: % Stain 1 2+ Cells	1.31628		Tumor: % Stain 1 2+ Cells	0.822525		Tumor: % Stain 1 2+ Cells	0.256451		Tumor: % Stain 1 2+ Cells	0.1443		Tumor: % Stain 1 2+ Cells	0.236282
		Tumor: % Stain 1 3+ Cells	2.02653		Tumor: % Stain 1 3+ Cells	0.769513		Tumor: % Stain 1 3+ Cells	0.685673		Tumor: % Stain 1 3+ Cells	1.35389		Tumor: % Stain 1 3+ Cells	0.28472		Tumor: % Stain 1 3+ Cells	0.128226		Tumor: % Stain 1 3+ Cells	0.0962001		Tumor: % Stain 1 3+ Cells	0.0525072
		Tumor: Stain 1 H-Score	13.0435		Tumor: Stain 1 H-Score	5.02015		Tumor: Stain 1 H-Score	4.8358		Tumor: Stain 1 H-Score	9.77811		Tumor: Stain 1 H-Score	4.7137		Tumor: Stain 1 H-Score	1.21814		Tumor: Stain 1 H-Score	0.817701		Tumor: Stain 1 H-Score	0.787608
		Tumor: % Stain 2 Positive Cells	0		Tumor: % Stain 2 Positive Cells	0		Tumor: % Stain 2 Positive Cells	0		Tumor: % Stain 2 Positive Cells	0		Tumor: % Stain 2 Positive Cells	0		Tumor: % Stain 2 Positive Cells	0		Tumor: % Stain 2 Positive Cells	0		Tumor: % Stain 2 Positive Cells	0
		Tumor: % Stain 2 0+ Cells	100		Tumor: % Stain 2 0+ Cells	100		Tumor: % Stain 2 0+ Cells	100		Tumor: % Stain 2 0+ Cells	100		Tumor: % Stain 2 0+ Cells	100		Tumor: % Stain 2 0+ Cells	100		Tumor: % Stain 2 0+ Cells	100		Tumor: % Stain 2 0+ Cells	100
		Tumor: % Stain 2 1+ Cells	0		Tumor: % Stain 2 1+ Cells	0		Tumor: % Stain 2 1+ Cells	0		Tumor: % Stain 2 1+ Cells	0		Tumor: % Stain 2 1+ Cells	0		Tumor: % Stain 2 1+ Cells	0		Tumor: % Stain 2 1+ Cells	0		Tumor: % Stain 2 1+ Cells	0
		Tumor: % Stain 2 2+ Cells	0		Tumor: % Stain 2 2+ Cells	0		Tumor: % Stain 2 2+ Cells	0		Tumor: % Stain 2 2+ Cells	0		Tumor: % Stain 2 2+ Cells	0		Tumor: % Stain 2 2+ Cells	0		Tumor: % Stain 2 2+ Cells	0		Tumor: % Stain 2 2+ Cells	0
		Tumor: % Stain 2 3+ Cells	0		Tumor: % Stain 2 3+ Cells	0		Tumor: % Stain 2 3+ Cells	0		Tumor: % Stain 2 3+ Cells	0		Tumor: % Stain 2 3+ Cells	0		Tumor: % Stain 2 3+ Cells	0		Tumor: % Stain 2 3+ Cells	0		Tumor: % Stain 2 3+ Cells	0
		Tumor: Stain 2 H-Score	0		Tumor: Stain 2 H-Score	0		Tumor: Stain 2 H-Score	0		Tumor: Stain 2 H-Score	0		Tumor: Stain 2 H-Score	0		Tumor: Stain 2 H-Score	0		Tumor: Stain 2 H-Score	0		Tumor: Stain 2 H-Score	0
		Tumor: % Dual Positive Cells	0		Tumor: % Dual Positive Cells	0		Tumor: % Dual Positive Cells	0		Tumor: % Dual Positive Cells	0		Tumor: % Dual Positive Cells	0		Tumor: % Dual Positive Cells	0		Tumor: % Dual Positive Cells	0		Tumor: % Dual Positive Cells	0
		Tumor: % Dual Negative Cells	93.1098		Tumor: % Dual Negative Cells	97.2517		Tumor: % Dual Negative Cells	97.2573		Tumor: % Dual Negative Cells	94.246		Tumor: % Dual Negative Cells	96.6783		Tumor: % Dual Negative Cells	99.2948		Tumor: % Dual Negative Cells	99.519		Tumor: % Dual Negative Cells	99.5537
		Tumor: Avg Stain 1 Nuclear OD	0.0691084		Tumor: Avg Stain 1 Nuclear OD	0.0456599		Tumor: Avg Stain 1 Nuclear OD	0.0469803		Tumor: Avg Stain 1 Nuclear OD	0.0632467		Tumor: Avg Stain 1 Nuclear OD	0.0448237		Tumor: Avg Stain 1 Nuclear OD	0.0312507		Tumor: Avg Stain 1 Nuclear OD	0.0310013		Tumor: Avg Stain 1 Nuclear OD	0.0306032
		Tumor: Avg Stain 2 Nuclear OD	0.039584		Tumor: Avg Stain 2 Nuclear OD	0.0375896		Tumor: Avg Stain 2 Nuclear OD	0.037326		Tumor: Avg Stain 2 Nuclear OD	0.0386051		Tumor: Avg Stain 2 Nuclear OD	0.0370393		Tumor: Avg Stain 2 Nuclear OD	0.03715		Tumor: Avg Stain 2 Nuclear OD	0.0367547		Tumor: Avg Stain 2 Nuclear OD	0.0367664
		Tumor: Avg Stain 1 Cytoplasmic OD	0.0381352		Tumor: Avg Stain 1 Cytoplasmic OD	0.0326957		Tumor: Avg Stain 1 Cytoplasmic OD	0.0328962		Tumor: Avg Stain 1 Cytoplasmic OD	0.0381899		Tumor: Avg Stain 1 Cytoplasmic OD	0.031821		Tumor: Avg Stain 1 Cytoplasmic OD	0.0294608		Tumor: Avg Stain 1 Cytoplasmic OD	0.0295773		Tumor: Avg Stain 1 Cytoplasmic OD	0.0297041
		Tumor: Avg Stain 2 Cytoplasmic OD	0.032283		Tumor: Avg Stain 2 Cytoplasmic OD	0.0321247		Tumor: Avg Stain 2 Cytoplasmic OD	0.0318961		Tumor: Avg Stain 2 Cytoplasmic OD	0.0321062		Tumor: Avg Stain 2 Cytoplasmic OD	0.0324312		Tumor: Avg Stain 2 Cytoplasmic OD	0.032341		Tumor: Avg Stain 2 Cytoplasmic OD	0.0322214		Tumor: Avg Stain 2 Cytoplasmic OD	0.0322544
		Tumor: Avg Cell Area (µm²)	103.921		Tumor: Avg Cell Area (µm²)	112.157		Tumor: Avg Cell Area (µm²)	122.241		Tumor: Avg Cell Area (µm²)	125.358		Tumor: Avg Cell Area (µm²)	91.2505		Tumor: Avg Cell Area (µm²)	83.7487		Tumor: Avg Cell Area (µm²)	90.3299		Tumor: Avg Cell Area (µm²)	85.9643
		Tumor: Avg Cytoplasm Area (µm²)	70.1345		Tumor: Avg Cytoplasm Area (µm²)	76.5378		Tumor: Avg Cytoplasm Area (µm²)	85.2912		Tumor: Avg Cytoplasm Area (µm²)	82.8987		Tumor: Avg Cytoplasm Area (µm²)	64.5749		Tumor: Avg Cytoplasm Area (µm²)	57.5019		Tumor: Avg Cytoplasm Area (µm²)	63.1701		Tumor: Avg Cytoplasm Area (µm²)	61.1499
		Tumor: Avg Nucleus Area (µm²)	33.7866		Tumor: Avg Nucleus Area (µm²)	35.6197		Tumor: Avg Nucleus Area (µm²)	36.9493		Tumor: Avg Nucleus Area (µm²)	42.4592		Tumor: Avg Nucleus Area (µm²)	26.6756		Tumor: Avg Nucleus Area (µm²)	26.2468		Tumor: Avg Nucleus Area (µm²)	27.1598		Tumor: Avg Nucleus Area (µm²)	24.8143
		Tumor: Avg Nucleus Perimeter (µm)	13.2163		Tumor: Avg Nucleus Perimeter (µm)	13.9159		Tumor: Avg Nucleus Perimeter (µm)	14.4111		Tumor: Avg Nucleus Perimeter (µm)	16.2241		Tumor: Avg Nucleus Perimeter (µm)	10.5803		Tumor: Avg Nucleus Perimeter (µm)	10.4139		Tumor: Avg Nucleus Perimeter (µm)	10.7556		Tumor: Avg Nucleus Perimeter (µm)	9.8606
		Tumor: Avg Nucleus Roundness	0.676987		Tumor: Avg Nucleus Roundness	0.681786		Tumor: Avg Nucleus Roundness	0.689887		Tumor: Avg Nucleus Roundness	0.684458		Tumor: Avg Nucleus Roundness	0.678663		Tumor: Avg Nucleus Roundness	0.671524		Tumor: Avg Nucleus Roundness	0.676422		Tumor: Avg Nucleus Roundness	0.675228
		Tumor: Tissue Area (µm²)	561421		Tumor: Tissue Area (µm²)	634129		Tumor: Tissue Area (µm²)	748533		Tumor: Tissue Area (µm²)	667912		Tumor: Tissue Area (µm²)	583066		Tumor: Tissue Area (µm²)	1005330		Tumor: Tissue Area (µm²)	756295		Tumor: Tissue Area (µm²)	666729
		BSNA8.1f	HOM
		Name	Value		Name	Value		Name	Value		Name	Value		Name	Value		Name	Value		Name	Value		Name	Value
		Classified Area (mm²)	0.54382		Classified Area (mm²)	0.57798		Classified Area (mm²)	0.68695		Classified Area (mm²)	0.59686		Classified Area (mm²)	0.92162		Classified Area (mm²)	0.82121		Classified Area (mm²)	0.61914		Classified Area (mm²)	0.62561
		Tumor Area (mm²)	0.5342		Tumor Area (mm²)	0.57061		Tumor Area (mm²)	0.67794		Tumor Area (mm²)	0.58271		Tumor Area (mm²)	0.89542		Tumor Area (mm²)	0.76181		Tumor Area (mm²)	0.52085		Tumor Area (mm²)	0.58362
		Necrosis Area (mm²)	0		Necrosis Area (mm²)	0		Necrosis Area (mm²)	0		Necrosis Area (mm²)	0		Necrosis Area (mm²)	0		Necrosis Area (mm²)	0		Necrosis Area (mm²)	0.00044		Necrosis Area (mm²)	0
		Empty Area (mm²)	0.00248		Empty Area (mm²)	0.00043		Empty Area (mm²)	0.00252		Empty Area (mm²)	0.00045		Empty Area (mm²)	0.0133		Empty Area (mm²)	0.02955		Empty Area (mm²)	0.00671		Empty Area (mm²)	0.03324
		Normal Area (mm²)	0.00714		Normal Area (mm²)	0.00694		Normal Area (mm²)	0.00649		Normal Area (mm²)	0.0137		Normal Area (mm²)	0.01289		Normal Area (mm²)	0.02985		Normal Area (mm²)	0.09114		Normal Area (mm²)	0.00874
		Total Cells	2726		Total Cells	2905		Total Cells	2957		Total Cells	2724		Total Cells	4233		Total Cells	4179		Total Cells	2595		Total Cells	3241
		Stain 1 Positive Cells	29		Stain 1 Positive Cells	48		Stain 1 Positive Cells	22		Stain 1 Positive Cells	37		Stain 1 Positive Cells	52		Stain 1 Positive Cells	31		Stain 1 Positive Cells	4		Stain 1 Positive Cells	28
		Stain 1 0+ Cells	2697		Stain 1 0+ Cells	2857		Stain 1 0+ Cells	2935		Stain 1 0+ Cells	2687		Stain 1 0+ Cells	4181		Stain 1 0+ Cells	4148		Stain 1 0+ Cells	2591		Stain 1 0+ Cells	3213
		Stain 1 1+ Cells	13		Stain 1 1+ Cells	26		Stain 1 1+ Cells	12		Stain 1 1+ Cells	17		Stain 1 1+ Cells	26		Stain 1 1+ Cells	17		Stain 1 1+ Cells	2		Stain 1 1+ Cells	13
		Stain 1 2+ Cells	10		Stain 1 2+ Cells	11		Stain 1 2+ Cells	4		Stain 1 2+ Cells	12		Stain 1 2+ Cells	12		Stain 1 2+ Cells	5		Stain 1 2+ Cells	0		Stain 1 2+ Cells	6
		Stain 1 3+ Cells	6		Stain 1 3+ Cells	11		Stain 1 3+ Cells	6		Stain 1 3+ Cells	8		Stain 1 3+ Cells	14		Stain 1 3+ Cells	9		Stain 1 3+ Cells	2		Stain 1 3+ Cells	9
		Stain 2 Positive Cells	0		Stain 2 Positive Cells	0		Stain 2 Positive Cells	0		Stain 2 Positive Cells	0		Stain 2 Positive Cells	0		Stain 2 Positive Cells	0		Stain 2 Positive Cells	0		Stain 2 Positive Cells	0
		Stain 2 0+ Cells	2726		Stain 2 0+ Cells	2905		Stain 2 0+ Cells	2957		Stain 2 0+ Cells	2724		Stain 2 0+ Cells	4233		Stain 2 0+ Cells	4179		Stain 2 0+ Cells	2595		Stain 2 0+ Cells	3241
		Stain 2 1+ Cells	0		Stain 2 1+ Cells	0		Stain 2 1+ Cells	0		Stain 2 1+ Cells	0		Stain 2 1+ Cells	0		Stain 2 1+ Cells	0		Stain 2 1+ Cells	0		Stain 2 1+ Cells	0
		Stain 2 2+ Cells	0		Stain 2 2+ Cells	0		Stain 2 2+ Cells	0		Stain 2 2+ Cells	0		Stain 2 2+ Cells	0		Stain 2 2+ Cells	0		Stain 2 2+ Cells	0		Stain 2 2+ Cells	0
		Stain 2 3+ Cells	0		Stain 2 3+ Cells	0		Stain 2 3+ Cells	0		Stain 2 3+ Cells	0		Stain 2 3+ Cells	0		Stain 2 3+ Cells	0		Stain 2 3+ Cells	0		Stain 2 3+ Cells	0
		Dual Positive Cells	0		Dual Positive Cells	0		Dual Positive Cells	0		Dual Positive Cells	0		Dual Positive Cells	0		Dual Positive Cells	0		Dual Positive Cells	0		Dual Positive Cells	0
		Dual Negative Cells	2697		Dual Negative Cells	2857		Dual Negative Cells	2935		Dual Negative Cells	2687		Dual Negative Cells	4181		Dual Negative Cells	4148		Dual Negative Cells	2591		Dual Negative Cells	3213
		% Stain 1 Positive Cells	1.06383		% Stain 1 Positive Cells	1.65232		% Stain 1 Positive Cells	0.743997		% Stain 1 Positive Cells	1.3583		% Stain 1 Positive Cells	1.22844		% Stain 1 Positive Cells	0.741804		% Stain 1 Positive Cells	0.154143		% Stain 1 Positive Cells	0.863931
		% Stain 1 0+ Cells	98.9362		% Stain 1 0+ Cells	98.3477		% Stain 1 0+ Cells	99.256		% Stain 1 0+ Cells	98.6417		% Stain 1 0+ Cells	98.7716		% Stain 1 0+ Cells	99.2582		% Stain 1 0+ Cells	99.8459		% Stain 1 0+ Cells	99.1361
		% Stain 1 1+ Cells	0.476889		% Stain 1 1+ Cells	0.895009		% Stain 1 1+ Cells	0.405817		% Stain 1 1+ Cells	0.624082		% Stain 1 1+ Cells	0.614222		% Stain 1 1+ Cells	0.406796		% Stain 1 1+ Cells	0.0770713		% Stain 1 1+ Cells	0.401111
		% Stain 1 2+ Cells	0.366838		% Stain 1 2+ Cells	0.378657		% Stain 1 2+ Cells	0.135272		% Stain 1 2+ Cells	0.440529		% Stain 1 2+ Cells	0.283487		% Stain 1 2+ Cells	0.119646		% Stain 1 2+ Cells	0		% Stain 1 2+ Cells	0.185128
		% Stain 1 3+ Cells	0.220103		% Stain 1 3+ Cells	0.378657		% Stain 1 3+ Cells	0.202908		% Stain 1 3+ Cells	0.293686		% Stain 1 3+ Cells	0.330735		% Stain 1 3+ Cells	0.215363		% Stain 1 3+ Cells	0.0770713		% Stain 1 3+ Cells	0.277692
		Stain 1 H-Score	1.87087		Stain 1 H-Score	2.7883		Stain 1 H-Score	1.28509		Stain 1 H-Score	2.3862		Stain 1 H-Score	2.1734		Stain 1 H-Score	1.29218		Stain 1 H-Score	0.308285		Stain 1 H-Score	1.60444
		% Stain 2 Positive Cells	0		% Stain 2 Positive Cells	0		% Stain 2 Positive Cells	0		% Stain 2 Positive Cells	0		% Stain 2 Positive Cells	0		% Stain 2 Positive Cells	0		% Stain 2 Positive Cells	0		% Stain 2 Positive Cells	0
		% Stain 2 0+ Cells	100		% Stain 2 0+ Cells	100		% Stain 2 0+ Cells	100		% Stain 2 0+ Cells	100		% Stain 2 0+ Cells	100		% Stain 2 0+ Cells	100		% Stain 2 0+ Cells	100		% Stain 2 0+ Cells	100
		% Stain 2 1+ Cells	0		% Stain 2 1+ Cells	0		% Stain 2 1+ Cells	0		% Stain 2 1+ Cells	0		% Stain 2 1+ Cells	0		% Stain 2 1+ Cells	0		% Stain 2 1+ Cells	0		% Stain 2 1+ Cells	0
		% Stain 2 2+ Cells	0		% Stain 2 2+ Cells	0		% Stain 2 2+ Cells	0		% Stain 2 2+ Cells	0		% Stain 2 2+ Cells	0		% Stain 2 2+ Cells	0		% Stain 2 2+ Cells	0		% Stain 2 2+ Cells	0
		% Stain 2 3+ Cells	0		% Stain 2 3+ Cells	0		% Stain 2 3+ Cells	0		% Stain 2 3+ Cells	0		% Stain 2 3+ Cells	0		% Stain 2 3+ Cells	0		% Stain 2 3+ Cells	0		% Stain 2 3+ Cells	0
		Stain 2 H-Score	0		Stain 2 H-Score	0		Stain 2 H-Score	0		Stain 2 H-Score	0		Stain 2 H-Score	0		Stain 2 H-Score	0		Stain 2 H-Score	0		Stain 2 H-Score	0
		% Dual Positive Cells	0		% Dual Positive Cells	0		% Dual Positive Cells	0		% Dual Positive Cells	0		% Dual Positive Cells	0		% Dual Positive Cells	0		% Dual Positive Cells	0		% Dual Positive Cells	0
		% Dual Negative Cells	98.9362		% Dual Negative Cells	98.3477		% Dual Negative Cells	99.256		% Dual Negative Cells	98.6417		% Dual Negative Cells	98.7716		% Dual Negative Cells	99.2582		% Dual Negative Cells	99.8459		% Dual Negative Cells	99.1361
		Avg Stain 1 Nuclear OD	0.0351987		Avg Stain 1 Nuclear OD	0.0402853		Avg Stain 1 Nuclear OD	0.0339206		Avg Stain 1 Nuclear OD	0.0363779		Avg Stain 1 Nuclear OD	0.0351268		Avg Stain 1 Nuclear OD	0.0319884		Avg Stain 1 Nuclear OD	0.0291491		Avg Stain 1 Nuclear OD	0.0329705
		Avg Stain 2 Nuclear OD	0.0356899		Avg Stain 2 Nuclear OD	0.0345645		Avg Stain 2 Nuclear OD	0.0353858		Avg Stain 2 Nuclear OD	0.036264		Avg Stain 2 Nuclear OD	0.0364742		Avg Stain 2 Nuclear OD	0.0373973		Avg Stain 2 Nuclear OD	0.036642		Avg Stain 2 Nuclear OD	0.0364645
		Avg Stain 1 Cytoplasmic OD	0.0310612		Avg Stain 1 Cytoplasmic OD	0.032938		Avg Stain 1 Cytoplasmic OD	0.0309267		Avg Stain 1 Cytoplasmic OD	0.0308131		Avg Stain 1 Cytoplasmic OD	0.0305363		Avg Stain 1 Cytoplasmic OD	0.0295771		Avg Stain 1 Cytoplasmic OD	0.0295741		Avg Stain 1 Cytoplasmic OD	0.0299487
		Avg Stain 2 Cytoplasmic OD	0.0318939		Avg Stain 2 Cytoplasmic OD	0.0313975		Avg Stain 2 Cytoplasmic OD	0.0319662		Avg Stain 2 Cytoplasmic OD	0.0322027		Avg Stain 2 Cytoplasmic OD	0.0320874		Avg Stain 2 Cytoplasmic OD	0.0321799		Avg Stain 2 Cytoplasmic OD	0.032232		Avg Stain 2 Cytoplasmic OD	0.0319553
		Avg Cell Area (µm²)	89.4859		Avg Cell Area (µm²)	94.0466		Avg Cell Area (µm²)	96.8848		Avg Cell Area (µm²)	87.6731		Avg Cell Area (µm²)	88.202		Avg Cell Area (µm²)	78.8723		Avg Cell Area (µm²)	88.3508		Avg Cell Area (µm²)	82.3275
		Avg Cytoplasm Area (µm²)	62.6002		Avg Cytoplasm Area (µm²)	65.8477		Avg Cytoplasm Area (µm²)	68.3582		Avg Cytoplasm Area (µm²)	59.6554		Avg Cytoplasm Area (µm²)	60.6194		Avg Cytoplasm Area (µm²)	51.2042		Avg Cytoplasm Area (µm²)	63.2376		Avg Cytoplasm Area (µm²)	54.8563
		Avg Nucleus Area (µm²)	26.8857		Avg Nucleus Area (µm²)	28.199		Avg Nucleus Area (µm²)	28.5266		Avg Nucleus Area (µm²)	28.0177		Avg Nucleus Area (µm²)	27.5826		Avg Nucleus Area (µm²)	27.6681		Avg Nucleus Area (µm²)	25.1132		Avg Nucleus Area (µm²)	27.4711
		Avg Nucleus Perimeter (µm)	10.6431		Avg Nucleus Perimeter (µm)	11.1664		Avg Nucleus Perimeter (µm)	11.2941		Avg Nucleus Perimeter (µm)	11.0414		Avg Nucleus Perimeter (µm)	10.9286		Avg Nucleus Perimeter (µm)	10.9681		Avg Nucleus Perimeter (µm)	9.97568		Avg Nucleus Perimeter (µm)	10.8849
		Avg Nucleus Roundness	0.675299		Avg Nucleus Roundness	0.682515		Avg Nucleus Roundness	0.679588		Avg Nucleus Roundness	0.674642		Avg Nucleus Roundness	0.669588		Avg Nucleus Roundness	0.66982		Avg Nucleus Roundness	0.681401		Avg Nucleus Roundness	0.669683
		Tissue Area (µm²)	492697		Tissue Area (µm²)	555045		Tissue Area (µm²)	578859		Tissue Area (µm²)	449705		Tissue Area (µm²)	743454		Tissue Area (µm²)	602155		Tissue Area (µm²)	467934		Tissue Area (µm²)	503203
		Tumor: Total Cells	2726		Tumor: Total Cells	2905		Tumor: Total Cells	2957		Tumor: Total Cells	2724		Tumor: Total Cells	4233		Tumor: Total Cells	4179		Tumor: Total Cells	2595		Tumor: Total Cells	3241
		Tumor: Stain 1 Positive Cells	29		Tumor: Stain 1 Positive Cells	48		Tumor: Stain 1 Positive Cells	22		Tumor: Stain 1 Positive Cells	37		Tumor: Stain 1 Positive Cells	52		Tumor: Stain 1 Positive Cells	31		Tumor: Stain 1 Positive Cells	4		Tumor: Stain 1 Positive Cells	28
		Tumor: Stain 1 0+ Cells	2697		Tumor: Stain 1 0+ Cells	2857		Tumor: Stain 1 0+ Cells	2935		Tumor: Stain 1 0+ Cells	2687		Tumor: Stain 1 0+ Cells	4181		Tumor: Stain 1 0+ Cells	4148		Tumor: Stain 1 0+ Cells	2591		Tumor: Stain 1 0+ Cells	3213
		Tumor: Stain 1 1+ Cells	13		Tumor: Stain 1 1+ Cells	26		Tumor: Stain 1 1+ Cells	12		Tumor: Stain 1 1+ Cells	17		Tumor: Stain 1 1+ Cells	26		Tumor: Stain 1 1+ Cells	17		Tumor: Stain 1 1+ Cells	2		Tumor: Stain 1 1+ Cells	13
		Tumor: Stain 1 2+ Cells	10		Tumor: Stain 1 2+ Cells	11		Tumor: Stain 1 2+ Cells	4		Tumor: Stain 1 2+ Cells	12		Tumor: Stain 1 2+ Cells	12		Tumor: Stain 1 2+ Cells	5		Tumor: Stain 1 2+ Cells	0		Tumor: Stain 1 2+ Cells	6
		Tumor: Stain 1 3+ Cells	6		Tumor: Stain 1 3+ Cells	11		Tumor: Stain 1 3+ Cells	6		Tumor: Stain 1 3+ Cells	8		Tumor: Stain 1 3+ Cells	14		Tumor: Stain 1 3+ Cells	9		Tumor: Stain 1 3+ Cells	2		Tumor: Stain 1 3+ Cells	9
		Tumor: Stain 2 Positive Cells	0		Tumor: Stain 2 Positive Cells	0		Tumor: Stain 2 Positive Cells	0		Tumor: Stain 2 Positive Cells	0		Tumor: Stain 2 Positive Cells	0		Tumor: Stain 2 Positive Cells	0		Tumor: Stain 2 Positive Cells	0		Tumor: Stain 2 Positive Cells	0
		Tumor: Stain 2 0+ Cells	2726		Tumor: Stain 2 0+ Cells	2905		Tumor: Stain 2 0+ Cells	2957		Tumor: Stain 2 0+ Cells	2724		Tumor: Stain 2 0+ Cells	4233		Tumor: Stain 2 0+ Cells	4179		Tumor: Stain 2 0+ Cells	2595		Tumor: Stain 2 0+ Cells	3241
		Tumor: Stain 2 1+ Cells	0		Tumor: Stain 2 1+ Cells	0		Tumor: Stain 2 1+ Cells	0		Tumor: Stain 2 1+ Cells	0		Tumor: Stain 2 1+ Cells	0		Tumor: Stain 2 1+ Cells	0		Tumor: Stain 2 1+ Cells	0		Tumor: Stain 2 1+ Cells	0
		Tumor: Stain 2 2+ Cells	0		Tumor: Stain 2 2+ Cells	0		Tumor: Stain 2 2+ Cells	0		Tumor: Stain 2 2+ Cells	0		Tumor: Stain 2 2+ Cells	0		Tumor: Stain 2 2+ Cells	0		Tumor: Stain 2 2+ Cells	0		Tumor: Stain 2 2+ Cells	0
		Tumor: Stain 2 3+ Cells	0		Tumor: Stain 2 3+ Cells	0		Tumor: Stain 2 3+ Cells	0		Tumor: Stain 2 3+ Cells	0		Tumor: Stain 2 3+ Cells	0		Tumor: Stain 2 3+ Cells	0		Tumor: Stain 2 3+ Cells	0		Tumor: Stain 2 3+ Cells	0
		Tumor: Dual Positive Cells	0		Tumor: Dual Positive Cells	0		Tumor: Dual Positive Cells	0		Tumor: Dual Positive Cells	0		Tumor: Dual Positive Cells	0		Tumor: Dual Positive Cells	0		Tumor: Dual Positive Cells	0		Tumor: Dual Positive Cells	0
		Tumor: Dual Negative Cells	2697		Tumor: Dual Negative Cells	2857		Tumor: Dual Negative Cells	2935		Tumor: Dual Negative Cells	2687		Tumor: Dual Negative Cells	4181		Tumor: Dual Negative Cells	4148		Tumor: Dual Negative Cells	2591		Tumor: Dual Negative Cells	3213
		Tumor: % Stain 1 Positive Cells	1.06383		Tumor: % Stain 1 Positive Cells	1.65232		Tumor: % Stain 1 Positive Cells	0.743997		Tumor: % Stain 1 Positive Cells	1.3583		Tumor: % Stain 1 Positive Cells	1.22844		Tumor: % Stain 1 Positive Cells	0.741804		Tumor: % Stain 1 Positive Cells	0.154143		Tumor: % Stain 1 Positive Cells	0.863931		0.975846
		Tumor: % Stain 1 0+ Cells	98.9362		Tumor: % Stain 1 0+ Cells	98.3477		Tumor: % Stain 1 0+ Cells	99.256		Tumor: % Stain 1 0+ Cells	98.6417		Tumor: % Stain 1 0+ Cells	98.7716		Tumor: % Stain 1 0+ Cells	99.2582		Tumor: % Stain 1 0+ Cells	99.8459		Tumor: % Stain 1 0+ Cells	99.1361
		Tumor: % Stain 1 1+ Cells	0.476889		Tumor: % Stain 1 1+ Cells	0.895009		Tumor: % Stain 1 1+ Cells	0.405817		Tumor: % Stain 1 1+ Cells	0.624082		Tumor: % Stain 1 1+ Cells	0.614222		Tumor: % Stain 1 1+ Cells	0.406796		Tumor: % Stain 1 1+ Cells	0.0770713		Tumor: % Stain 1 1+ Cells	0.401111
		Tumor: % Stain 1 2+ Cells	0.366838		Tumor: % Stain 1 2+ Cells	0.378657		Tumor: % Stain 1 2+ Cells	0.135272		Tumor: % Stain 1 2+ Cells	0.440529		Tumor: % Stain 1 2+ Cells	0.283487		Tumor: % Stain 1 2+ Cells	0.119646		Tumor: % Stain 1 2+ Cells	0		Tumor: % Stain 1 2+ Cells	0.185128
		Tumor: % Stain 1 3+ Cells	0.220103		Tumor: % Stain 1 3+ Cells	0.378657		Tumor: % Stain 1 3+ Cells	0.202908		Tumor: % Stain 1 3+ Cells	0.293686		Tumor: % Stain 1 3+ Cells	0.330735		Tumor: % Stain 1 3+ Cells	0.215363		Tumor: % Stain 1 3+ Cells	0.0770713		Tumor: % Stain 1 3+ Cells	0.277692
		Tumor: Stain 1 H-Score	1.87087		Tumor: Stain 1 H-Score	2.7883		Tumor: Stain 1 H-Score	1.28509		Tumor: Stain 1 H-Score	2.3862		Tumor: Stain 1 H-Score	2.1734		Tumor: Stain 1 H-Score	1.29218		Tumor: Stain 1 H-Score	0.308285		Tumor: Stain 1 H-Score	1.60444
		Tumor: % Stain 2 Positive Cells	0		Tumor: % Stain 2 Positive Cells	0		Tumor: % Stain 2 Positive Cells	0		Tumor: % Stain 2 Positive Cells	0		Tumor: % Stain 2 Positive Cells	0		Tumor: % Stain 2 Positive Cells	0		Tumor: % Stain 2 Positive Cells	0		Tumor: % Stain 2 Positive Cells	0
		Tumor: % Stain 2 0+ Cells	100		Tumor: % Stain 2 0+ Cells	100		Tumor: % Stain 2 0+ Cells	100		Tumor: % Stain 2 0+ Cells	100		Tumor: % Stain 2 0+ Cells	100		Tumor: % Stain 2 0+ Cells	100		Tumor: % Stain 2 0+ Cells	100		Tumor: % Stain 2 0+ Cells	100
		Tumor: % Stain 2 1+ Cells	0		Tumor: % Stain 2 1+ Cells	0		Tumor: % Stain 2 1+ Cells	0		Tumor: % Stain 2 1+ Cells	0		Tumor: % Stain 2 1+ Cells	0		Tumor: % Stain 2 1+ Cells	0		Tumor: % Stain 2 1+ Cells	0		Tumor: % Stain 2 1+ Cells	0
		Tumor: % Stain 2 2+ Cells	0		Tumor: % Stain 2 2+ Cells	0		Tumor: % Stain 2 2+ Cells	0		Tumor: % Stain 2 2+ Cells	0		Tumor: % Stain 2 2+ Cells	0		Tumor: % Stain 2 2+ Cells	0		Tumor: % Stain 2 2+ Cells	0		Tumor: % Stain 2 2+ Cells	0
		Tumor: % Stain 2 3+ Cells	0		Tumor: % Stain 2 3+ Cells	0		Tumor: % Stain 2 3+ Cells	0		Tumor: % Stain 2 3+ Cells	0		Tumor: % Stain 2 3+ Cells	0		Tumor: % Stain 2 3+ Cells	0		Tumor: % Stain 2 3+ Cells	0		Tumor: % Stain 2 3+ Cells	0
		Tumor: Stain 2 H-Score	0		Tumor: Stain 2 H-Score	0		Tumor: Stain 2 H-Score	0		Tumor: Stain 2 H-Score	0		Tumor: Stain 2 H-Score	0		Tumor: Stain 2 H-Score	0		Tumor: Stain 2 H-Score	0		Tumor: Stain 2 H-Score	0
		Tumor: % Dual Positive Cells	0		Tumor: % Dual Positive Cells	0		Tumor: % Dual Positive Cells	0		Tumor: % Dual Positive Cells	0		Tumor: % Dual Positive Cells	0		Tumor: % Dual Positive Cells	0		Tumor: % Dual Positive Cells	0		Tumor: % Dual Positive Cells	0
		Tumor: % Dual Negative Cells	98.9362		Tumor: % Dual Negative Cells	98.3477		Tumor: % Dual Negative Cells	99.256		Tumor: % Dual Negative Cells	98.6417		Tumor: % Dual Negative Cells	98.7716		Tumor: % Dual Negative Cells	99.2582		Tumor: % Dual Negative Cells	99.8459		Tumor: % Dual Negative Cells	99.1361
		Tumor: Avg Stain 1 Nuclear OD	0.0351987		Tumor: Avg Stain 1 Nuclear OD	0.0402853		Tumor: Avg Stain 1 Nuclear OD	0.0339206		Tumor: Avg Stain 1 Nuclear OD	0.0363779		Tumor: Avg Stain 1 Nuclear OD	0.0351268		Tumor: Avg Stain 1 Nuclear OD	0.0319884		Tumor: Avg Stain 1 Nuclear OD	0.0291491		Tumor: Avg Stain 1 Nuclear OD	0.0329705
		Tumor: Avg Stain 2 Nuclear OD	0.0356899		Tumor: Avg Stain 2 Nuclear OD	0.0345645		Tumor: Avg Stain 2 Nuclear OD	0.0353858		Tumor: Avg Stain 2 Nuclear OD	0.036264		Tumor: Avg Stain 2 Nuclear OD	0.0364742		Tumor: Avg Stain 2 Nuclear OD	0.0373973		Tumor: Avg Stain 2 Nuclear OD	0.036642		Tumor: Avg Stain 2 Nuclear OD	0.0364645
		Tumor: Avg Stain 1 Cytoplasmic OD	0.0310612		Tumor: Avg Stain 1 Cytoplasmic OD	0.032938		Tumor: Avg Stain 1 Cytoplasmic OD	0.0309267		Tumor: Avg Stain 1 Cytoplasmic OD	0.0308131		Tumor: Avg Stain 1 Cytoplasmic OD	0.0305363		Tumor: Avg Stain 1 Cytoplasmic OD	0.0295771		Tumor: Avg Stain 1 Cytoplasmic OD	0.0295741		Tumor: Avg Stain 1 Cytoplasmic OD	0.0299487
		Tumor: Avg Stain 2 Cytoplasmic OD	0.0318939		Tumor: Avg Stain 2 Cytoplasmic OD	0.0313975		Tumor: Avg Stain 2 Cytoplasmic OD	0.0319662		Tumor: Avg Stain 2 Cytoplasmic OD	0.0322027		Tumor: Avg Stain 2 Cytoplasmic OD	0.0320874		Tumor: Avg Stain 2 Cytoplasmic OD	0.0321799		Tumor: Avg Stain 2 Cytoplasmic OD	0.032232		Tumor: Avg Stain 2 Cytoplasmic OD	0.0319553
		Tumor: Avg Cell Area (µm²)	89.4859		Tumor: Avg Cell Area (µm²)	94.0466		Tumor: Avg Cell Area (µm²)	96.8848		Tumor: Avg Cell Area (µm²)	87.6731		Tumor: Avg Cell Area (µm²)	88.202		Tumor: Avg Cell Area (µm²)	78.8723		Tumor: Avg Cell Area (µm²)	88.3508		Tumor: Avg Cell Area (µm²)	82.3275
		Tumor: Avg Cytoplasm Area (µm²)	62.6002		Tumor: Avg Cytoplasm Area (µm²)	65.8477		Tumor: Avg Cytoplasm Area (µm²)	68.3582		Tumor: Avg Cytoplasm Area (µm²)	59.6554		Tumor: Avg Cytoplasm Area (µm²)	60.6194		Tumor: Avg Cytoplasm Area (µm²)	51.2042		Tumor: Avg Cytoplasm Area (µm²)	63.2376		Tumor: Avg Cytoplasm Area (µm²)	54.8563
		Tumor: Avg Nucleus Area (µm²)	26.8857		Tumor: Avg Nucleus Area (µm²)	28.199		Tumor: Avg Nucleus Area (µm²)	28.5266		Tumor: Avg Nucleus Area (µm²)	28.0177		Tumor: Avg Nucleus Area (µm²)	27.5826		Tumor: Avg Nucleus Area (µm²)	27.6681		Tumor: Avg Nucleus Area (µm²)	25.1132		Tumor: Avg Nucleus Area (µm²)	27.4711
		Tumor: Avg Nucleus Perimeter (µm)	10.6431		Tumor: Avg Nucleus Perimeter (µm)	11.1664		Tumor: Avg Nucleus Perimeter (µm)	11.2941		Tumor: Avg Nucleus Perimeter (µm)	11.0414		Tumor: Avg Nucleus Perimeter (µm)	10.9286		Tumor: Avg Nucleus Perimeter (µm)	10.9681		Tumor: Avg Nucleus Perimeter (µm)	9.97568		Tumor: Avg Nucleus Perimeter (µm)	10.8849
		Tumor: Avg Nucleus Roundness	0.675299		Tumor: Avg Nucleus Roundness	0.682515		Tumor: Avg Nucleus Roundness	0.679588		Tumor: Avg Nucleus Roundness	0.674642		Tumor: Avg Nucleus Roundness	0.669588		Tumor: Avg Nucleus Roundness	0.66982		Tumor: Avg Nucleus Roundness	0.681401		Tumor: Avg Nucleus Roundness	0.669683
		Tumor: Tissue Area (µm²)	492697		Tumor: Tissue Area (µm²)	555045		Tumor: Tissue Area (µm²)	578859		Tumor: Tissue Area (µm²)	449705		Tumor: Tissue Area (µm²)	743454		Tumor: Tissue Area (µm²)	602155		Tumor: Tissue Area (µm²)	467934		Tumor: Tissue Area (µm²)	503203
		BSNA11.1f	HOM
		Name	Value		Name	Value		Name	Value		Name	Value		Name	Value		Name	Value		Name	Value		Name	Value
		Classified Area (mm²)	0.84163		Classified Area (mm²)	0.74726		Classified Area (mm²)	0.63305		Classified Area (mm²)	0.67342		Classified Area (mm²)	0.80102		Classified Area (mm²)	0.67927		Classified Area (mm²)	0.88826		Classified Area (mm²)	0.63273
		Tumor Area (mm²)	0.76642		Tumor Area (mm²)	0.71196		Tumor Area (mm²)	0.6096		Tumor Area (mm²)	0.59902		Tumor Area (mm²)	0.51915		Tumor Area (mm²)	0.60104		Tumor Area (mm²)	0.68305		Tumor Area (mm²)	0.50088
		Necrosis Area (mm²)	0.00053		Necrosis Area (mm²)	0		Necrosis Area (mm²)	0		Necrosis Area (mm²)	2e-05		Necrosis Area (mm²)	0.00055		Necrosis Area (mm²)	0.00194		Necrosis Area (mm²)	0		Necrosis Area (mm²)	0
		Empty Area (mm²)	0.00076		Empty Area (mm²)	0.00118		Empty Area (mm²)	0.00401		Empty Area (mm²)	0.06326		Empty Area (mm²)	0.2089		Empty Area (mm²)	0.0355		Empty Area (mm²)	0.01938		Empty Area (mm²)	0.00068
		Normal Area (mm²)	0.07392		Normal Area (mm²)	0.03413		Normal Area (mm²)	0.01944		Normal Area (mm²)	0.01112		Normal Area (mm²)	0.07241		Normal Area (mm²)	0.04079		Normal Area (mm²)	0.18584		Normal Area (mm²)	0.13117
		Total Cells	4366		Total Cells	3749		Total Cells	3235		Total Cells	2878		Total Cells	2933		Total Cells	3014		Total Cells	3424		Total Cells	2852
		Stain 1 Positive Cells	128		Stain 1 Positive Cells	34		Stain 1 Positive Cells	24		Stain 1 Positive Cells	28		Stain 1 Positive Cells	35		Stain 1 Positive Cells	37		Stain 1 Positive Cells	37		Stain 1 Positive Cells	17
		Stain 1 0+ Cells	4238		Stain 1 0+ Cells	3715		Stain 1 0+ Cells	3211		Stain 1 0+ Cells	2850		Stain 1 0+ Cells	2898		Stain 1 0+ Cells	2977		Stain 1 0+ Cells	3387		Stain 1 0+ Cells	2835
		Stain 1 1+ Cells	58		Stain 1 1+ Cells	16		Stain 1 1+ Cells	12		Stain 1 1+ Cells	5		Stain 1 1+ Cells	17		Stain 1 1+ Cells	14		Stain 1 1+ Cells	19		Stain 1 1+ Cells	5
		Stain 1 2+ Cells	48		Stain 1 2+ Cells	6		Stain 1 2+ Cells	9		Stain 1 2+ Cells	8		Stain 1 2+ Cells	4		Stain 1 2+ Cells	4		Stain 1 2+ Cells	14		Stain 1 2+ Cells	7
		Stain 1 3+ Cells	22		Stain 1 3+ Cells	12		Stain 1 3+ Cells	3		Stain 1 3+ Cells	15		Stain 1 3+ Cells	14		Stain 1 3+ Cells	19		Stain 1 3+ Cells	4		Stain 1 3+ Cells	5
		Stain 2 Positive Cells	0		Stain 2 Positive Cells	0		Stain 2 Positive Cells	0		Stain 2 Positive Cells	0		Stain 2 Positive Cells	0		Stain 2 Positive Cells	0		Stain 2 Positive Cells	0		Stain 2 Positive Cells	0
		Stain 2 0+ Cells	4366		Stain 2 0+ Cells	3749		Stain 2 0+ Cells	3235		Stain 2 0+ Cells	2878		Stain 2 0+ Cells	2933		Stain 2 0+ Cells	3014		Stain 2 0+ Cells	3424		Stain 2 0+ Cells	2852
		Stain 2 1+ Cells	0		Stain 2 1+ Cells	0		Stain 2 1+ Cells	0		Stain 2 1+ Cells	0		Stain 2 1+ Cells	0		Stain 2 1+ Cells	0		Stain 2 1+ Cells	0		Stain 2 1+ Cells	0
		Stain 2 2+ Cells	0		Stain 2 2+ Cells	0		Stain 2 2+ Cells	0		Stain 2 2+ Cells	0		Stain 2 2+ Cells	0		Stain 2 2+ Cells	0		Stain 2 2+ Cells	0		Stain 2 2+ Cells	0
		Stain 2 3+ Cells	0		Stain 2 3+ Cells	0		Stain 2 3+ Cells	0		Stain 2 3+ Cells	0		Stain 2 3+ Cells	0		Stain 2 3+ Cells	0		Stain 2 3+ Cells	0		Stain 2 3+ Cells	0
		Dual Positive Cells	0		Dual Positive Cells	0		Dual Positive Cells	0		Dual Positive Cells	0		Dual Positive Cells	0		Dual Positive Cells	0		Dual Positive Cells	0		Dual Positive Cells	0
		Dual Negative Cells	4238		Dual Negative Cells	3715		Dual Negative Cells	3211		Dual Negative Cells	2850		Dual Negative Cells	2898		Dual Negative Cells	2977		Dual Negative Cells	3387		Dual Negative Cells	2835
		% Stain 1 Positive Cells	2.93175		% Stain 1 Positive Cells	0.906909		% Stain 1 Positive Cells	0.741886		% Stain 1 Positive Cells	0.972898		% Stain 1 Positive Cells	1.19332		% Stain 1 Positive Cells	1.2276		% Stain 1 Positive Cells	1.08061		% Stain 1 Positive Cells	0.596073
		% Stain 1 0+ Cells	97.0683		% Stain 1 0+ Cells	99.0931		% Stain 1 0+ Cells	99.2581		% Stain 1 0+ Cells	99.0271		% Stain 1 0+ Cells	98.8067		% Stain 1 0+ Cells	98.7724		% Stain 1 0+ Cells	98.9194		% Stain 1 0+ Cells	99.4039
		% Stain 1 1+ Cells	1.32845		% Stain 1 1+ Cells	0.42678		% Stain 1 1+ Cells	0.370943		% Stain 1 1+ Cells	0.173732		% Stain 1 1+ Cells	0.579611		% Stain 1 1+ Cells	0.464499		% Stain 1 1+ Cells	0.554907		% Stain 1 1+ Cells	0.175316
		% Stain 1 2+ Cells	1.0994		% Stain 1 2+ Cells	0.160043		% Stain 1 2+ Cells	0.278207		% Stain 1 2+ Cells	0.277971		% Stain 1 2+ Cells	0.136379		% Stain 1 2+ Cells	0.132714		% Stain 1 2+ Cells	0.408879		% Stain 1 2+ Cells	0.245442
		% Stain 1 3+ Cells	0.503894		% Stain 1 3+ Cells	0.320085		% Stain 1 3+ Cells	0.0927357		% Stain 1 3+ Cells	0.521195		% Stain 1 3+ Cells	0.477327		% Stain 1 3+ Cells	0.630392		% Stain 1 3+ Cells	0.116822		% Stain 1 3+ Cells	0.175316
		Stain 1 H-Score	5.03894		Stain 1 H-Score	1.70712		Stain 1 H-Score	1.20556		Stain 1 H-Score	2.29326		Stain 1 H-Score	2.28435		Stain 1 H-Score	2.6211		Stain 1 H-Score	1.72313		Stain 1 H-Score	1.19215
		% Stain 2 Positive Cells	0		% Stain 2 Positive Cells	0		% Stain 2 Positive Cells	0		% Stain 2 Positive Cells	0		% Stain 2 Positive Cells	0		% Stain 2 Positive Cells	0		% Stain 2 Positive Cells	0		% Stain 2 Positive Cells	0
		% Stain 2 0+ Cells	100		% Stain 2 0+ Cells	100		% Stain 2 0+ Cells	100		% Stain 2 0+ Cells	100		% Stain 2 0+ Cells	100		% Stain 2 0+ Cells	100		% Stain 2 0+ Cells	100		% Stain 2 0+ Cells	100
		% Stain 2 1+ Cells	0		% Stain 2 1+ Cells	0		% Stain 2 1+ Cells	0		% Stain 2 1+ Cells	0		% Stain 2 1+ Cells	0		% Stain 2 1+ Cells	0		% Stain 2 1+ Cells	0		% Stain 2 1+ Cells	0
		% Stain 2 2+ Cells	0		% Stain 2 2+ Cells	0		% Stain 2 2+ Cells	0		% Stain 2 2+ Cells	0		% Stain 2 2+ Cells	0		% Stain 2 2+ Cells	0		% Stain 2 2+ Cells	0		% Stain 2 2+ Cells	0
		% Stain 2 3+ Cells	0		% Stain 2 3+ Cells	0		% Stain 2 3+ Cells	0		% Stain 2 3+ Cells	0		% Stain 2 3+ Cells	0		% Stain 2 3+ Cells	0		% Stain 2 3+ Cells	0		% Stain 2 3+ Cells	0
		Stain 2 H-Score	0		Stain 2 H-Score	0		Stain 2 H-Score	0		Stain 2 H-Score	0		Stain 2 H-Score	0		Stain 2 H-Score	0		Stain 2 H-Score	0		Stain 2 H-Score	0
		% Dual Positive Cells	0		% Dual Positive Cells	0		% Dual Positive Cells	0		% Dual Positive Cells	0		% Dual Positive Cells	0		% Dual Positive Cells	0		% Dual Positive Cells	0		% Dual Positive Cells	0
		% Dual Negative Cells	97.0683		% Dual Negative Cells	99.0931		% Dual Negative Cells	99.2581		% Dual Negative Cells	99.0271		% Dual Negative Cells	98.8067		% Dual Negative Cells	98.7724		% Dual Negative Cells	98.9194		% Dual Negative Cells	99.4039
		Avg Stain 1 Nuclear OD	0.0465443		Avg Stain 1 Nuclear OD	0.0341571		Avg Stain 1 Nuclear OD	0.0326345		Avg Stain 1 Nuclear OD	0.0352333		Avg Stain 1 Nuclear OD	0.0426308		Avg Stain 1 Nuclear OD	0.0382308		Avg Stain 1 Nuclear OD	0.0347447		Avg Stain 1 Nuclear OD	0.0325922
		Avg Stain 2 Nuclear OD	0.0356452		Avg Stain 2 Nuclear OD	0.0354202		Avg Stain 2 Nuclear OD	0.0359138		Avg Stain 2 Nuclear OD	0.0363387		Avg Stain 2 Nuclear OD	0.0333412		Avg Stain 2 Nuclear OD	0.0347994		Avg Stain 2 Nuclear OD	0.0354802		Avg Stain 2 Nuclear OD	0.0346026
		Avg Stain 1 Cytoplasmic OD	0.034554		Avg Stain 1 Cytoplasmic OD	0.0310929		Avg Stain 1 Cytoplasmic OD	0.0306881		Avg Stain 1 Cytoplasmic OD	0.03082		Avg Stain 1 Cytoplasmic OD	0.0360468		Avg Stain 1 Cytoplasmic OD	0.0325936		Avg Stain 1 Cytoplasmic OD	0.0311617		Avg Stain 1 Cytoplasmic OD	0.0311529
		Avg Stain 2 Cytoplasmic OD	0.0313116		Avg Stain 2 Cytoplasmic OD	0.0316027		Avg Stain 2 Cytoplasmic OD	0.0316916		Avg Stain 2 Cytoplasmic OD	0.0316345		Avg Stain 2 Cytoplasmic OD	0.0309712		Avg Stain 2 Cytoplasmic OD	0.031533		Avg Stain 2 Cytoplasmic OD	0.0317762		Avg Stain 2 Cytoplasmic OD	0.0312805
		Avg Cell Area (µm²)	89.8353		Avg Cell Area (µm²)	92.0389		Avg Cell Area (µm²)	85.3876		Avg Cell Area (µm²)	86.6279		Avg Cell Area (µm²)	82.5147		Avg Cell Area (µm²)	90.6245		Avg Cell Area (µm²)	96.5557		Avg Cell Area (µm²)	87.4731
		Avg Cytoplasm Area (µm²)	60.546		Avg Cytoplasm Area (µm²)	63.2927		Avg Cytoplasm Area (µm²)	58.4814		Avg Cytoplasm Area (µm²)	58.3995		Avg Cytoplasm Area (µm²)	55.5188		Avg Cytoplasm Area (µm²)	62.2008		Avg Cytoplasm Area (µm²)	64.0891		Avg Cytoplasm Area (µm²)	60.1429
		Avg Nucleus Area (µm²)	29.2893		Avg Nucleus Area (µm²)	28.7461		Avg Nucleus Area (µm²)	26.9062		Avg Nucleus Area (µm²)	28.2283		Avg Nucleus Area (µm²)	26.996		Avg Nucleus Area (µm²)	28.4236		Avg Nucleus Area (µm²)	32.4667		Avg Nucleus Area (µm²)	27.3302
		Avg Nucleus Perimeter (µm)	11.5998		Avg Nucleus Perimeter (µm)	11.4057		Avg Nucleus Perimeter (µm)	10.6796		Avg Nucleus Perimeter (µm)	11.1943		Avg Nucleus Perimeter (µm)	10.7194		Avg Nucleus Perimeter (µm)	11.2424		Avg Nucleus Perimeter (µm)	12.8284		Avg Nucleus Perimeter (µm)	10.8475
		Avg Nucleus Roundness	0.674249		Avg Nucleus Roundness	0.670514		Avg Nucleus Roundness	0.665563		Avg Nucleus Roundness	0.666907		Avg Nucleus Roundness	0.666161		Avg Nucleus Roundness	0.66858		Avg Nucleus Roundness	0.671993		Avg Nucleus Roundness	0.67561
		Tissue Area (µm²)	766725		Tissue Area (µm²)	684320		Tissue Area (µm²)	536050		Tissue Area (µm²)	471413		Tissue Area (µm²)	454246		Tissue Area (µm²)	537416		Tissue Area (µm²)	634205		Tissue Area (µm²)	499022
		Tumor: Total Cells	4366		Tumor: Total Cells	3749		Tumor: Total Cells	3235		Tumor: Total Cells	2878		Tumor: Total Cells	2933		Tumor: Total Cells	3014		Tumor: Total Cells	3424		Tumor: Total Cells	2852
		Tumor: Stain 1 Positive Cells	128		Tumor: Stain 1 Positive Cells	34		Tumor: Stain 1 Positive Cells	24		Tumor: Stain 1 Positive Cells	28		Tumor: Stain 1 Positive Cells	35		Tumor: Stain 1 Positive Cells	37		Tumor: Stain 1 Positive Cells	37		Tumor: Stain 1 Positive Cells	17
		Tumor: Stain 1 0+ Cells	4238		Tumor: Stain 1 0+ Cells	3715		Tumor: Stain 1 0+ Cells	3211		Tumor: Stain 1 0+ Cells	2850		Tumor: Stain 1 0+ Cells	2898		Tumor: Stain 1 0+ Cells	2977		Tumor: Stain 1 0+ Cells	3387		Tumor: Stain 1 0+ Cells	2835
		Tumor: Stain 1 1+ Cells	58		Tumor: Stain 1 1+ Cells	16		Tumor: Stain 1 1+ Cells	12		Tumor: Stain 1 1+ Cells	5		Tumor: Stain 1 1+ Cells	17		Tumor: Stain 1 1+ Cells	14		Tumor: Stain 1 1+ Cells	19		Tumor: Stain 1 1+ Cells	5
		Tumor: Stain 1 2+ Cells	48		Tumor: Stain 1 2+ Cells	6		Tumor: Stain 1 2+ Cells	9		Tumor: Stain 1 2+ Cells	8		Tumor: Stain 1 2+ Cells	4		Tumor: Stain 1 2+ Cells	4		Tumor: Stain 1 2+ Cells	14		Tumor: Stain 1 2+ Cells	7
		Tumor: Stain 1 3+ Cells	22		Tumor: Stain 1 3+ Cells	12		Tumor: Stain 1 3+ Cells	3		Tumor: Stain 1 3+ Cells	15		Tumor: Stain 1 3+ Cells	14		Tumor: Stain 1 3+ Cells	19		Tumor: Stain 1 3+ Cells	4		Tumor: Stain 1 3+ Cells	5
		Tumor: Stain 2 Positive Cells	0		Tumor: Stain 2 Positive Cells	0		Tumor: Stain 2 Positive Cells	0		Tumor: Stain 2 Positive Cells	0		Tumor: Stain 2 Positive Cells	0		Tumor: Stain 2 Positive Cells	0		Tumor: Stain 2 Positive Cells	0		Tumor: Stain 2 Positive Cells	0
		Tumor: Stain 2 0+ Cells	4366		Tumor: Stain 2 0+ Cells	3749		Tumor: Stain 2 0+ Cells	3235		Tumor: Stain 2 0+ Cells	2878		Tumor: Stain 2 0+ Cells	2933		Tumor: Stain 2 0+ Cells	3014		Tumor: Stain 2 0+ Cells	3424		Tumor: Stain 2 0+ Cells	2852
		Tumor: Stain 2 1+ Cells	0		Tumor: Stain 2 1+ Cells	0		Tumor: Stain 2 1+ Cells	0		Tumor: Stain 2 1+ Cells	0		Tumor: Stain 2 1+ Cells	0		Tumor: Stain 2 1+ Cells	0		Tumor: Stain 2 1+ Cells	0		Tumor: Stain 2 1+ Cells	0
		Tumor: Stain 2 2+ Cells	0		Tumor: Stain 2 2+ Cells	0		Tumor: Stain 2 2+ Cells	0		Tumor: Stain 2 2+ Cells	0		Tumor: Stain 2 2+ Cells	0		Tumor: Stain 2 2+ Cells	0		Tumor: Stain 2 2+ Cells	0		Tumor: Stain 2 2+ Cells	0
		Tumor: Stain 2 3+ Cells	0		Tumor: Stain 2 3+ Cells	0		Tumor: Stain 2 3+ Cells	0		Tumor: Stain 2 3+ Cells	0		Tumor: Stain 2 3+ Cells	0		Tumor: Stain 2 3+ Cells	0		Tumor: Stain 2 3+ Cells	0		Tumor: Stain 2 3+ Cells	0
		Tumor: Dual Positive Cells	0		Tumor: Dual Positive Cells	0		Tumor: Dual Positive Cells	0		Tumor: Dual Positive Cells	0		Tumor: Dual Positive Cells	0		Tumor: Dual Positive Cells	0		Tumor: Dual Positive Cells	0		Tumor: Dual Positive Cells	0
		Tumor: Dual Negative Cells	4238		Tumor: Dual Negative Cells	3715		Tumor: Dual Negative Cells	3211		Tumor: Dual Negative Cells	2850		Tumor: Dual Negative Cells	2898		Tumor: Dual Negative Cells	2977		Tumor: Dual Negative Cells	3387		Tumor: Dual Negative Cells	2835
		Tumor: % Stain 1 Positive Cells	2.93175		Tumor: % Stain 1 Positive Cells	0.906909		Tumor: % Stain 1 Positive Cells	0.741886		Tumor: % Stain 1 Positive Cells	0.972898		Tumor: % Stain 1 Positive Cells	1.19332		Tumor: % Stain 1 Positive Cells	1.2276		Tumor: % Stain 1 Positive Cells	1.08061		Tumor: % Stain 1 Positive Cells	0.596073		1.20638
		Tumor: % Stain 1 0+ Cells	97.0683		Tumor: % Stain 1 0+ Cells	99.0931		Tumor: % Stain 1 0+ Cells	99.2581		Tumor: % Stain 1 0+ Cells	99.0271		Tumor: % Stain 1 0+ Cells	98.8067		Tumor: % Stain 1 0+ Cells	98.7724		Tumor: % Stain 1 0+ Cells	98.9194		Tumor: % Stain 1 0+ Cells	99.4039
		Tumor: % Stain 1 1+ Cells	1.32845		Tumor: % Stain 1 1+ Cells	0.42678		Tumor: % Stain 1 1+ Cells	0.370943		Tumor: % Stain 1 1+ Cells	0.173732		Tumor: % Stain 1 1+ Cells	0.579611		Tumor: % Stain 1 1+ Cells	0.464499		Tumor: % Stain 1 1+ Cells	0.554907		Tumor: % Stain 1 1+ Cells	0.175316
		Tumor: % Stain 1 2+ Cells	1.0994		Tumor: % Stain 1 2+ Cells	0.160043		Tumor: % Stain 1 2+ Cells	0.278207		Tumor: % Stain 1 2+ Cells	0.277971		Tumor: % Stain 1 2+ Cells	0.136379		Tumor: % Stain 1 2+ Cells	0.132714		Tumor: % Stain 1 2+ Cells	0.408879		Tumor: % Stain 1 2+ Cells	0.245442
		Tumor: % Stain 1 3+ Cells	0.503894		Tumor: % Stain 1 3+ Cells	0.320085		Tumor: % Stain 1 3+ Cells	0.0927357		Tumor: % Stain 1 3+ Cells	0.521195		Tumor: % Stain 1 3+ Cells	0.477327		Tumor: % Stain 1 3+ Cells	0.630392		Tumor: % Stain 1 3+ Cells	0.116822		Tumor: % Stain 1 3+ Cells	0.175316
		Tumor: Stain 1 H-Score	5.03894		Tumor: Stain 1 H-Score	1.70712		Tumor: Stain 1 H-Score	1.20556		Tumor: Stain 1 H-Score	2.29326		Tumor: Stain 1 H-Score	2.28435		Tumor: Stain 1 H-Score	2.6211		Tumor: Stain 1 H-Score	1.72313		Tumor: Stain 1 H-Score	1.19215
		Tumor: % Stain 2 Positive Cells	0		Tumor: % Stain 2 Positive Cells	0		Tumor: % Stain 2 Positive Cells	0		Tumor: % Stain 2 Positive Cells	0		Tumor: % Stain 2 Positive Cells	0		Tumor: % Stain 2 Positive Cells	0		Tumor: % Stain 2 Positive Cells	0		Tumor: % Stain 2 Positive Cells	0
		Tumor: % Stain 2 0+ Cells	100		Tumor: % Stain 2 0+ Cells	100		Tumor: % Stain 2 0+ Cells	100		Tumor: % Stain 2 0+ Cells	100		Tumor: % Stain 2 0+ Cells	100		Tumor: % Stain 2 0+ Cells	100		Tumor: % Stain 2 0+ Cells	100		Tumor: % Stain 2 0+ Cells	100
		Tumor: % Stain 2 1+ Cells	0		Tumor: % Stain 2 1+ Cells	0		Tumor: % Stain 2 1+ Cells	0		Tumor: % Stain 2 1+ Cells	0		Tumor: % Stain 2 1+ Cells	0		Tumor: % Stain 2 1+ Cells	0		Tumor: % Stain 2 1+ Cells	0		Tumor: % Stain 2 1+ Cells	0
		Tumor: % Stain 2 2+ Cells	0		Tumor: % Stain 2 2+ Cells	0		Tumor: % Stain 2 2+ Cells	0		Tumor: % Stain 2 2+ Cells	0		Tumor: % Stain 2 2+ Cells	0		Tumor: % Stain 2 2+ Cells	0		Tumor: % Stain 2 2+ Cells	0		Tumor: % Stain 2 2+ Cells	0
		Tumor: % Stain 2 3+ Cells	0		Tumor: % Stain 2 3+ Cells	0		Tumor: % Stain 2 3+ Cells	0		Tumor: % Stain 2 3+ Cells	0		Tumor: % Stain 2 3+ Cells	0		Tumor: % Stain 2 3+ Cells	0		Tumor: % Stain 2 3+ Cells	0		Tumor: % Stain 2 3+ Cells	0
		Tumor: Stain 2 H-Score	0		Tumor: Stain 2 H-Score	0		Tumor: Stain 2 H-Score	0		Tumor: Stain 2 H-Score	0		Tumor: Stain 2 H-Score	0		Tumor: Stain 2 H-Score	0		Tumor: Stain 2 H-Score	0		Tumor: Stain 2 H-Score	0
		Tumor: % Dual Positive Cells	0		Tumor: % Dual Positive Cells	0		Tumor: % Dual Positive Cells	0		Tumor: % Dual Positive Cells	0		Tumor: % Dual Positive Cells	0		Tumor: % Dual Positive Cells	0		Tumor: % Dual Positive Cells	0		Tumor: % Dual Positive Cells	0
		Tumor: % Dual Negative Cells	97.0683		Tumor: % Dual Negative Cells	99.0931		Tumor: % Dual Negative Cells	99.2581		Tumor: % Dual Negative Cells	99.0271		Tumor: % Dual Negative Cells	98.8067		Tumor: % Dual Negative Cells	98.7724		Tumor: % Dual Negative Cells	98.9194		Tumor: % Dual Negative Cells	99.4039
		Tumor: Avg Stain 1 Nuclear OD	0.0465443		Tumor: Avg Stain 1 Nuclear OD	0.0341571		Tumor: Avg Stain 1 Nuclear OD	0.0326345		Tumor: Avg Stain 1 Nuclear OD	0.0352333		Tumor: Avg Stain 1 Nuclear OD	0.0426308		Tumor: Avg Stain 1 Nuclear OD	0.0382308		Tumor: Avg Stain 1 Nuclear OD	0.0347447		Tumor: Avg Stain 1 Nuclear OD	0.0325922
		Tumor: Avg Stain 2 Nuclear OD	0.0356452		Tumor: Avg Stain 2 Nuclear OD	0.0354202		Tumor: Avg Stain 2 Nuclear OD	0.0359138		Tumor: Avg Stain 2 Nuclear OD	0.0363387		Tumor: Avg Stain 2 Nuclear OD	0.0333412		Tumor: Avg Stain 2 Nuclear OD	0.0347994		Tumor: Avg Stain 2 Nuclear OD	0.0354802		Tumor: Avg Stain 2 Nuclear OD	0.0346026
		Tumor: Avg Stain 1 Cytoplasmic OD	0.034554		Tumor: Avg Stain 1 Cytoplasmic OD	0.0310929		Tumor: Avg Stain 1 Cytoplasmic OD	0.0306881		Tumor: Avg Stain 1 Cytoplasmic OD	0.03082		Tumor: Avg Stain 1 Cytoplasmic OD	0.0360468		Tumor: Avg Stain 1 Cytoplasmic OD	0.0325936		Tumor: Avg Stain 1 Cytoplasmic OD	0.0311617		Tumor: Avg Stain 1 Cytoplasmic OD	0.0311529
		Tumor: Avg Stain 2 Cytoplasmic OD	0.0313116		Tumor: Avg Stain 2 Cytoplasmic OD	0.0316027		Tumor: Avg Stain 2 Cytoplasmic OD	0.0316916		Tumor: Avg Stain 2 Cytoplasmic OD	0.0316345		Tumor: Avg Stain 2 Cytoplasmic OD	0.0309712		Tumor: Avg Stain 2 Cytoplasmic OD	0.031533		Tumor: Avg Stain 2 Cytoplasmic OD	0.0317762		Tumor: Avg Stain 2 Cytoplasmic OD	0.0312805
		Tumor: Avg Cell Area (µm²)	89.8353		Tumor: Avg Cell Area (µm²)	92.0389		Tumor: Avg Cell Area (µm²)	85.3876		Tumor: Avg Cell Area (µm²)	86.6279		Tumor: Avg Cell Area (µm²)	82.5147		Tumor: Avg Cell Area (µm²)	90.6245		Tumor: Avg Cell Area (µm²)	96.5557		Tumor: Avg Cell Area (µm²)	87.4731
		Tumor: Avg Cytoplasm Area (µm²)	60.546		Tumor: Avg Cytoplasm Area (µm²)	63.2927		Tumor: Avg Cytoplasm Area (µm²)	58.4814		Tumor: Avg Cytoplasm Area (µm²)	58.3995		Tumor: Avg Cytoplasm Area (µm²)	55.5188		Tumor: Avg Cytoplasm Area (µm²)	62.2008		Tumor: Avg Cytoplasm Area (µm²)	64.0891		Tumor: Avg Cytoplasm Area (µm²)	60.1429
		Tumor: Avg Nucleus Area (µm²)	29.2893		Tumor: Avg Nucleus Area (µm²)	28.7461		Tumor: Avg Nucleus Area (µm²)	26.9062		Tumor: Avg Nucleus Area (µm²)	28.2283		Tumor: Avg Nucleus Area (µm²)	26.996		Tumor: Avg Nucleus Area (µm²)	28.4236		Tumor: Avg Nucleus Area (µm²)	32.4667		Tumor: Avg Nucleus Area (µm²)	27.3302
		Tumor: Avg Nucleus Perimeter (µm)	11.5998		Tumor: Avg Nucleus Perimeter (µm)	11.4057		Tumor: Avg Nucleus Perimeter (µm)	10.6796		Tumor: Avg Nucleus Perimeter (µm)	11.1943		Tumor: Avg Nucleus Perimeter (µm)	10.7194		Tumor: Avg Nucleus Perimeter (µm)	11.2424		Tumor: Avg Nucleus Perimeter (µm)	12.8284		Tumor: Avg Nucleus Perimeter (µm)	10.8475
		Tumor: Avg Nucleus Roundness	0.674249		Tumor: Avg Nucleus Roundness	0.670514		Tumor: Avg Nucleus Roundness	0.665563		Tumor: Avg Nucleus Roundness	0.666907		Tumor: Avg Nucleus Roundness	0.666161		Tumor: Avg Nucleus Roundness	0.66858		Tumor: Avg Nucleus Roundness	0.671993		Tumor: Avg Nucleus Roundness	0.67561
		Tumor: Tissue Area (µm²)	766725		Tumor: Tissue Area (µm²)	684320		Tumor: Tissue Area (µm²)	536050		Tumor: Tissue Area (µm²)	471413		Tumor: Tissue Area (µm²)	454246		Tumor: Tissue Area (µm²)	537416		Tumor: Tissue Area (µm²)	634205		Tumor: Tissue Area (µm²)	499022
		BSNA13.1b	HOM
		Name	Value		Name	Value		Name	Value		Name	Value		Name	Value		Name	Value		Name	Value		Name	Value
		Classified Area (mm²)	0.97194		Classified Area (mm²)	0.57716		Classified Area (mm²)	0.59174		Classified Area (mm²)	0.67595		Classified Area (mm²)	0.79162		Classified Area (mm²)	0.6647		Classified Area (mm²)	0.45764		Classified Area (mm²)	0.95997
		Tumor Area (mm²)	0.24193		Tumor Area (mm²)	0.19711		Tumor Area (mm²)	0.54674		Tumor Area (mm²)	0.53262		Tumor Area (mm²)	0.76317		Tumor Area (mm²)	0.64576		Tumor Area (mm²)	0.44018		Tumor Area (mm²)	0.29738
		Necrosis Area (mm²)	0		Necrosis Area (mm²)	0		Necrosis Area (mm²)	5e-05		Necrosis Area (mm²)	0.00015		Necrosis Area (mm²)	0		Necrosis Area (mm²)	0		Necrosis Area (mm²)	0		Necrosis Area (mm²)	0.00132
		Empty Area (mm²)	0.0016		Empty Area (mm²)	0.00295		Empty Area (mm²)	0.0001		Empty Area (mm²)	0.0099		Empty Area (mm²)	0.00057		Empty Area (mm²)	0		Empty Area (mm²)	0.0016		Empty Area (mm²)	0.0072
		Normal Area (mm²)	0.72841		Normal Area (mm²)	0.3771		Normal Area (mm²)	0.04485		Normal Area (mm²)	0.13328		Normal Area (mm²)	0.02788		Normal Area (mm²)	0.01894		Normal Area (mm²)	0.01586		Normal Area (mm²)	0.65408
		Total Cells	1533		Total Cells	1291		Total Cells	3305		Total Cells	3230		Total Cells	3473		Total Cells	3308		Total Cells	2090		Total Cells	1973
		Stain 1 Positive Cells	4		Stain 1 Positive Cells	4		Stain 1 Positive Cells	26		Stain 1 Positive Cells	9		Stain 1 Positive Cells	77		Stain 1 Positive Cells	120		Stain 1 Positive Cells	64		Stain 1 Positive Cells	2
		Stain 1 0+ Cells	1529		Stain 1 0+ Cells	1287		Stain 1 0+ Cells	3279		Stain 1 0+ Cells	3221		Stain 1 0+ Cells	3396		Stain 1 0+ Cells	3188		Stain 1 0+ Cells	2026		Stain 1 0+ Cells	1971
		Stain 1 1+ Cells	3		Stain 1 1+ Cells	3		Stain 1 1+ Cells	15		Stain 1 1+ Cells	6		Stain 1 1+ Cells	40		Stain 1 1+ Cells	51		Stain 1 1+ Cells	30		Stain 1 1+ Cells	2
		Stain 1 2+ Cells	1		Stain 1 2+ Cells	1		Stain 1 2+ Cells	6		Stain 1 2+ Cells	2		Stain 1 2+ Cells	18		Stain 1 2+ Cells	37		Stain 1 2+ Cells	19		Stain 1 2+ Cells	0
		Stain 1 3+ Cells	0		Stain 1 3+ Cells	0		Stain 1 3+ Cells	5		Stain 1 3+ Cells	1		Stain 1 3+ Cells	19		Stain 1 3+ Cells	32		Stain 1 3+ Cells	15		Stain 1 3+ Cells	0
		Stain 2 Positive Cells	0		Stain 2 Positive Cells	0		Stain 2 Positive Cells	0		Stain 2 Positive Cells	0		Stain 2 Positive Cells	0		Stain 2 Positive Cells	0		Stain 2 Positive Cells	0		Stain 2 Positive Cells	0
		Stain 2 0+ Cells	1533		Stain 2 0+ Cells	1291		Stain 2 0+ Cells	3305		Stain 2 0+ Cells	3230		Stain 2 0+ Cells	3473		Stain 2 0+ Cells	3308		Stain 2 0+ Cells	2090		Stain 2 0+ Cells	1973
		Stain 2 1+ Cells	0		Stain 2 1+ Cells	0		Stain 2 1+ Cells	0		Stain 2 1+ Cells	0		Stain 2 1+ Cells	0		Stain 2 1+ Cells	0		Stain 2 1+ Cells	0		Stain 2 1+ Cells	0
		Stain 2 2+ Cells	0		Stain 2 2+ Cells	0		Stain 2 2+ Cells	0		Stain 2 2+ Cells	0		Stain 2 2+ Cells	0		Stain 2 2+ Cells	0		Stain 2 2+ Cells	0		Stain 2 2+ Cells	0
		Stain 2 3+ Cells	0		Stain 2 3+ Cells	0		Stain 2 3+ Cells	0		Stain 2 3+ Cells	0		Stain 2 3+ Cells	0		Stain 2 3+ Cells	0		Stain 2 3+ Cells	0		Stain 2 3+ Cells	0
		Dual Positive Cells	0		Dual Positive Cells	0		Dual Positive Cells	0		Dual Positive Cells	0		Dual Positive Cells	0		Dual Positive Cells	0		Dual Positive Cells	0		Dual Positive Cells	0
		Dual Negative Cells	1529		Dual Negative Cells	1287		Dual Negative Cells	3279		Dual Negative Cells	3221		Dual Negative Cells	3396		Dual Negative Cells	3188		Dual Negative Cells	2026		Dual Negative Cells	1971
		% Stain 1 Positive Cells	0.260926		% Stain 1 Positive Cells	0.309837		% Stain 1 Positive Cells	0.786687		% Stain 1 Positive Cells	0.278638		% Stain 1 Positive Cells	2.2171		% Stain 1 Positive Cells	3.62757		% Stain 1 Positive Cells	3.0622		% Stain 1 Positive Cells	0.101368		1.33054
		% Stain 1 0+ Cells	99.7391		% Stain 1 0+ Cells	99.6902		% Stain 1 0+ Cells	99.2133		% Stain 1 0+ Cells	99.7214		% Stain 1 0+ Cells	97.7829		% Stain 1 0+ Cells	96.3724		% Stain 1 0+ Cells	96.9378		% Stain 1 0+ Cells	99.8986
		% Stain 1 1+ Cells	0.195695		% Stain 1 1+ Cells	0.232378		% Stain 1 1+ Cells	0.453858		% Stain 1 1+ Cells	0.185759		% Stain 1 1+ Cells	1.15174		% Stain 1 1+ Cells	1.54172		% Stain 1 1+ Cells	1.43541		% Stain 1 1+ Cells	0.101368
		% Stain 1 2+ Cells	0.0652316		% Stain 1 2+ Cells	0.0774593		% Stain 1 2+ Cells	0.181543		% Stain 1 2+ Cells	0.0619195		% Stain 1 2+ Cells	0.518284		% Stain 1 2+ Cells	1.1185		% Stain 1 2+ Cells	0.909091		% Stain 1 2+ Cells	0
		% Stain 1 3+ Cells	0		% Stain 1 3+ Cells	0		% Stain 1 3+ Cells	0.151286		% Stain 1 3+ Cells	0.0309598		% Stain 1 3+ Cells	0.547077		% Stain 1 3+ Cells	0.967352		% Stain 1 3+ Cells	0.717703		% Stain 1 3+ Cells	0
		Stain 1 H-Score	0.326158		Stain 1 H-Score	0.387297		Stain 1 H-Score	1.2708		Stain 1 H-Score	0.402477		Stain 1 H-Score	3.82954		Stain 1 H-Score	6.68077		Stain 1 H-Score	5.4067		Stain 1 H-Score	0.101368
		% Stain 2 Positive Cells	0		% Stain 2 Positive Cells	0		% Stain 2 Positive Cells	0		% Stain 2 Positive Cells	0		% Stain 2 Positive Cells	0		% Stain 2 Positive Cells	0		% Stain 2 Positive Cells	0		% Stain 2 Positive Cells	0
		% Stain 2 0+ Cells	100		% Stain 2 0+ Cells	100		% Stain 2 0+ Cells	100		% Stain 2 0+ Cells	100		% Stain 2 0+ Cells	100		% Stain 2 0+ Cells	100		% Stain 2 0+ Cells	100		% Stain 2 0+ Cells	100
		% Stain 2 1+ Cells	0		% Stain 2 1+ Cells	0		% Stain 2 1+ Cells	0		% Stain 2 1+ Cells	0		% Stain 2 1+ Cells	0		% Stain 2 1+ Cells	0		% Stain 2 1+ Cells	0		% Stain 2 1+ Cells	0
		% Stain 2 2+ Cells	0		% Stain 2 2+ Cells	0		% Stain 2 2+ Cells	0		% Stain 2 2+ Cells	0		% Stain 2 2+ Cells	0		% Stain 2 2+ Cells	0		% Stain 2 2+ Cells	0		% Stain 2 2+ Cells	0
		% Stain 2 3+ Cells	0		% Stain 2 3+ Cells	0		% Stain 2 3+ Cells	0		% Stain 2 3+ Cells	0		% Stain 2 3+ Cells	0		% Stain 2 3+ Cells	0		% Stain 2 3+ Cells	0		% Stain 2 3+ Cells	0
		Stain 2 H-Score	0		Stain 2 H-Score	0		Stain 2 H-Score	0		Stain 2 H-Score	0		Stain 2 H-Score	0		Stain 2 H-Score	0		Stain 2 H-Score	0		Stain 2 H-Score	0
		% Dual Positive Cells	0		% Dual Positive Cells	0		% Dual Positive Cells	0		% Dual Positive Cells	0		% Dual Positive Cells	0		% Dual Positive Cells	0		% Dual Positive Cells	0		% Dual Positive Cells	0
		% Dual Negative Cells	99.7391		% Dual Negative Cells	99.6902		% Dual Negative Cells	99.2133		% Dual Negative Cells	99.7214		% Dual Negative Cells	97.7829		% Dual Negative Cells	96.3724		% Dual Negative Cells	96.9378		% Dual Negative Cells	99.8986
		Avg Stain 1 Nuclear OD	0.0308455		Avg Stain 1 Nuclear OD	0.0322348		Avg Stain 1 Nuclear OD	0.0323311		Avg Stain 1 Nuclear OD	0.0305414		Avg Stain 1 Nuclear OD	0.0415742		Avg Stain 1 Nuclear OD	0.0514385		Avg Stain 1 Nuclear OD	0.0480549		Avg Stain 1 Nuclear OD	0.0308285
		Avg Stain 2 Nuclear OD	0.0369059		Avg Stain 2 Nuclear OD	0.0369794		Avg Stain 2 Nuclear OD	0.037604		Avg Stain 2 Nuclear OD	0.0368775		Avg Stain 2 Nuclear OD	0.036229		Avg Stain 2 Nuclear OD	0.0371384		Avg Stain 2 Nuclear OD	0.0366093		Avg Stain 2 Nuclear OD	0.0369893
		Avg Stain 1 Cytoplasmic OD	0.0306863		Avg Stain 1 Cytoplasmic OD	0.031451		Avg Stain 1 Cytoplasmic OD	0.0301185		Avg Stain 1 Cytoplasmic OD	0.0304672		Avg Stain 1 Cytoplasmic OD	0.0323026		Avg Stain 1 Cytoplasmic OD	0.0344593		Avg Stain 1 Cytoplasmic OD	0.0340605		Avg Stain 1 Cytoplasmic OD	0.0316845
		Avg Stain 2 Cytoplasmic OD	0.0324059		Avg Stain 2 Cytoplasmic OD	0.0321023		Avg Stain 2 Cytoplasmic OD	0.0319661		Avg Stain 2 Cytoplasmic OD	0.0320803		Avg Stain 2 Cytoplasmic OD	0.0318449		Avg Stain 2 Cytoplasmic OD	0.0319629		Avg Stain 2 Cytoplasmic OD	0.031867		Avg Stain 2 Cytoplasmic OD	0.0320632
		Avg Cell Area (µm²)	84.4725		Avg Cell Area (µm²)	82.4729		Avg Cell Area (µm²)	78.05		Avg Cell Area (µm²)	80.2031		Avg Cell Area (µm²)	100.105		Avg Cell Area (µm²)	92.2435		Avg Cell Area (µm²)	87.8934		Avg Cell Area (µm²)	81.2181
		Avg Cytoplasm Area (µm²)	58.6558		Avg Cytoplasm Area (µm²)	56.8094		Avg Cytoplasm Area (µm²)	54.1137		Avg Cytoplasm Area (µm²)	55.5445		Avg Cytoplasm Area (µm²)	72.7865		Avg Cytoplasm Area (µm²)	66.7074		Avg Cytoplasm Area (µm²)	62.2475		Avg Cytoplasm Area (µm²)	56.1159
		Avg Nucleus Area (µm²)	25.8167		Avg Nucleus Area (µm²)	25.6635		Avg Nucleus Area (µm²)	23.9363		Avg Nucleus Area (µm²)	24.6586		Avg Nucleus Area (µm²)	27.3189		Avg Nucleus Area (µm²)	25.5361		Avg Nucleus Area (µm²)	25.6459		Avg Nucleus Area (µm²)	25.1021
		Avg Nucleus Perimeter (µm)	10.2388		Avg Nucleus Perimeter (µm)	10.1671		Avg Nucleus Perimeter (µm)	9.51362		Avg Nucleus Perimeter (µm)	9.79916		Avg Nucleus Perimeter (µm)	10.8146		Avg Nucleus Perimeter (µm)	10.1231		Avg Nucleus Perimeter (µm)	10.1442		Avg Nucleus Perimeter (µm)	9.97587
		Avg Nucleus Roundness	0.666929		Avg Nucleus Roundness	0.669004		Avg Nucleus Roundness	0.662923		Avg Nucleus Roundness	0.674499		Avg Nucleus Roundness	0.688114		Avg Nucleus Roundness	0.681385		Avg Nucleus Roundness	0.672384		Avg Nucleus Roundness	0.67065
		Tissue Area (µm²)	264072		Tissue Area (µm²)	214564		Tissue Area (µm²)	534753		Tissue Area (µm²)	505038		Tissue Area (µm²)	744681		Tissue Area (µm²)	639037		Tissue Area (µm²)	377243		Tissue Area (µm²)	322764
		Tumor: Total Cells	1533		Tumor: Total Cells	1291		Tumor: Total Cells	3305		Tumor: Total Cells	3230		Tumor: Total Cells	3473		Tumor: Total Cells	3308		Tumor: Total Cells	2090		Tumor: Total Cells	1973
		Tumor: Stain 1 Positive Cells	4		Tumor: Stain 1 Positive Cells	4		Tumor: Stain 1 Positive Cells	26		Tumor: Stain 1 Positive Cells	9		Tumor: Stain 1 Positive Cells	77		Tumor: Stain 1 Positive Cells	120		Tumor: Stain 1 Positive Cells	64		Tumor: Stain 1 Positive Cells	2
		Tumor: Stain 1 0+ Cells	1529		Tumor: Stain 1 0+ Cells	1287		Tumor: Stain 1 0+ Cells	3279		Tumor: Stain 1 0+ Cells	3221		Tumor: Stain 1 0+ Cells	3396		Tumor: Stain 1 0+ Cells	3188		Tumor: Stain 1 0+ Cells	2026		Tumor: Stain 1 0+ Cells	1971
		Tumor: Stain 1 1+ Cells	3		Tumor: Stain 1 1+ Cells	3		Tumor: Stain 1 1+ Cells	15		Tumor: Stain 1 1+ Cells	6		Tumor: Stain 1 1+ Cells	40		Tumor: Stain 1 1+ Cells	51		Tumor: Stain 1 1+ Cells	30		Tumor: Stain 1 1+ Cells	2
		Tumor: Stain 1 2+ Cells	1		Tumor: Stain 1 2+ Cells	1		Tumor: Stain 1 2+ Cells	6		Tumor: Stain 1 2+ Cells	2		Tumor: Stain 1 2+ Cells	18		Tumor: Stain 1 2+ Cells	37		Tumor: Stain 1 2+ Cells	19		Tumor: Stain 1 2+ Cells	0
		Tumor: Stain 1 3+ Cells	0		Tumor: Stain 1 3+ Cells	0		Tumor: Stain 1 3+ Cells	5		Tumor: Stain 1 3+ Cells	1		Tumor: Stain 1 3+ Cells	19		Tumor: Stain 1 3+ Cells	32		Tumor: Stain 1 3+ Cells	15		Tumor: Stain 1 3+ Cells	0
		Tumor: Stain 2 Positive Cells	0		Tumor: Stain 2 Positive Cells	0		Tumor: Stain 2 Positive Cells	0		Tumor: Stain 2 Positive Cells	0		Tumor: Stain 2 Positive Cells	0		Tumor: Stain 2 Positive Cells	0		Tumor: Stain 2 Positive Cells	0		Tumor: Stain 2 Positive Cells	0
		Tumor: Stain 2 0+ Cells	1533		Tumor: Stain 2 0+ Cells	1291		Tumor: Stain 2 0+ Cells	3305		Tumor: Stain 2 0+ Cells	3230		Tumor: Stain 2 0+ Cells	3473		Tumor: Stain 2 0+ Cells	3308		Tumor: Stain 2 0+ Cells	2090		Tumor: Stain 2 0+ Cells	1973
		Tumor: Stain 2 1+ Cells	0		Tumor: Stain 2 1+ Cells	0		Tumor: Stain 2 1+ Cells	0		Tumor: Stain 2 1+ Cells	0		Tumor: Stain 2 1+ Cells	0		Tumor: Stain 2 1+ Cells	0		Tumor: Stain 2 1+ Cells	0		Tumor: Stain 2 1+ Cells	0
		Tumor: Stain 2 2+ Cells	0		Tumor: Stain 2 2+ Cells	0		Tumor: Stain 2 2+ Cells	0		Tumor: Stain 2 2+ Cells	0		Tumor: Stain 2 2+ Cells	0		Tumor: Stain 2 2+ Cells	0		Tumor: Stain 2 2+ Cells	0		Tumor: Stain 2 2+ Cells	0
		Tumor: Stain 2 3+ Cells	0		Tumor: Stain 2 3+ Cells	0		Tumor: Stain 2 3+ Cells	0		Tumor: Stain 2 3+ Cells	0		Tumor: Stain 2 3+ Cells	0		Tumor: Stain 2 3+ Cells	0		Tumor: Stain 2 3+ Cells	0		Tumor: Stain 2 3+ Cells	0
		Tumor: Dual Positive Cells	0		Tumor: Dual Positive Cells	0		Tumor: Dual Positive Cells	0		Tumor: Dual Positive Cells	0		Tumor: Dual Positive Cells	0		Tumor: Dual Positive Cells	0		Tumor: Dual Positive Cells	0		Tumor: Dual Positive Cells	0
		Tumor: Dual Negative Cells	1529		Tumor: Dual Negative Cells	1287		Tumor: Dual Negative Cells	3279		Tumor: Dual Negative Cells	3221		Tumor: Dual Negative Cells	3396		Tumor: Dual Negative Cells	3188		Tumor: Dual Negative Cells	2026		Tumor: Dual Negative Cells	1971
		Tumor: % Stain 1 Positive Cells	0.260926		Tumor: % Stain 1 Positive Cells	0.309837		Tumor: % Stain 1 Positive Cells	0.786687		Tumor: % Stain 1 Positive Cells	0.278638		Tumor: % Stain 1 Positive Cells	2.2171		Tumor: % Stain 1 Positive Cells	3.62757		Tumor: % Stain 1 Positive Cells	3.0622		Tumor: % Stain 1 Positive Cells	0.101368
		Tumor: % Stain 1 0+ Cells	99.7391		Tumor: % Stain 1 0+ Cells	99.6902		Tumor: % Stain 1 0+ Cells	99.2133		Tumor: % Stain 1 0+ Cells	99.7214		Tumor: % Stain 1 0+ Cells	97.7829		Tumor: % Stain 1 0+ Cells	96.3724		Tumor: % Stain 1 0+ Cells	96.9378		Tumor: % Stain 1 0+ Cells	99.8986
		Tumor: % Stain 1 1+ Cells	0.195695		Tumor: % Stain 1 1+ Cells	0.232378		Tumor: % Stain 1 1+ Cells	0.453858		Tumor: % Stain 1 1+ Cells	0.185759		Tumor: % Stain 1 1+ Cells	1.15174		Tumor: % Stain 1 1+ Cells	1.54172		Tumor: % Stain 1 1+ Cells	1.43541		Tumor: % Stain 1 1+ Cells	0.101368
		Tumor: % Stain 1 2+ Cells	0.0652316		Tumor: % Stain 1 2+ Cells	0.0774593		Tumor: % Stain 1 2+ Cells	0.181543		Tumor: % Stain 1 2+ Cells	0.0619195		Tumor: % Stain 1 2+ Cells	0.518284		Tumor: % Stain 1 2+ Cells	1.1185		Tumor: % Stain 1 2+ Cells	0.909091		Tumor: % Stain 1 2+ Cells	0
		Tumor: % Stain 1 3+ Cells	0		Tumor: % Stain 1 3+ Cells	0		Tumor: % Stain 1 3+ Cells	0.151286		Tumor: % Stain 1 3+ Cells	0.0309598		Tumor: % Stain 1 3+ Cells	0.547077		Tumor: % Stain 1 3+ Cells	0.967352		Tumor: % Stain 1 3+ Cells	0.717703		Tumor: % Stain 1 3+ Cells	0
		Tumor: Stain 1 H-Score	0.326158		Tumor: Stain 1 H-Score	0.387297		Tumor: Stain 1 H-Score	1.2708		Tumor: Stain 1 H-Score	0.402477		Tumor: Stain 1 H-Score	3.82954		Tumor: Stain 1 H-Score	6.68077		Tumor: Stain 1 H-Score	5.4067		Tumor: Stain 1 H-Score	0.101368
		Tumor: % Stain 2 Positive Cells	0		Tumor: % Stain 2 Positive Cells	0		Tumor: % Stain 2 Positive Cells	0		Tumor: % Stain 2 Positive Cells	0		Tumor: % Stain 2 Positive Cells	0		Tumor: % Stain 2 Positive Cells	0		Tumor: % Stain 2 Positive Cells	0		Tumor: % Stain 2 Positive Cells	0
		Tumor: % Stain 2 0+ Cells	100		Tumor: % Stain 2 0+ Cells	100		Tumor: % Stain 2 0+ Cells	100		Tumor: % Stain 2 0+ Cells	100		Tumor: % Stain 2 0+ Cells	100		Tumor: % Stain 2 0+ Cells	100		Tumor: % Stain 2 0+ Cells	100		Tumor: % Stain 2 0+ Cells	100
		Tumor: % Stain 2 1+ Cells	0		Tumor: % Stain 2 1+ Cells	0		Tumor: % Stain 2 1+ Cells	0		Tumor: % Stain 2 1+ Cells	0		Tumor: % Stain 2 1+ Cells	0		Tumor: % Stain 2 1+ Cells	0		Tumor: % Stain 2 1+ Cells	0		Tumor: % Stain 2 1+ Cells	0
		Tumor: % Stain 2 2+ Cells	0		Tumor: % Stain 2 2+ Cells	0		Tumor: % Stain 2 2+ Cells	0		Tumor: % Stain 2 2+ Cells	0		Tumor: % Stain 2 2+ Cells	0		Tumor: % Stain 2 2+ Cells	0		Tumor: % Stain 2 2+ Cells	0		Tumor: % Stain 2 2+ Cells	0
		Tumor: % Stain 2 3+ Cells	0		Tumor: % Stain 2 3+ Cells	0		Tumor: % Stain 2 3+ Cells	0		Tumor: % Stain 2 3+ Cells	0		Tumor: % Stain 2 3+ Cells	0		Tumor: % Stain 2 3+ Cells	0		Tumor: % Stain 2 3+ Cells	0		Tumor: % Stain 2 3+ Cells	0
		Tumor: Stain 2 H-Score	0		Tumor: Stain 2 H-Score	0		Tumor: Stain 2 H-Score	0		Tumor: Stain 2 H-Score	0		Tumor: Stain 2 H-Score	0		Tumor: Stain 2 H-Score	0		Tumor: Stain 2 H-Score	0		Tumor: Stain 2 H-Score	0
		Tumor: % Dual Positive Cells	0		Tumor: % Dual Positive Cells	0		Tumor: % Dual Positive Cells	0		Tumor: % Dual Positive Cells	0		Tumor: % Dual Positive Cells	0		Tumor: % Dual Positive Cells	0		Tumor: % Dual Positive Cells	0		Tumor: % Dual Positive Cells	0
		Tumor: % Dual Negative Cells	99.7391		Tumor: % Dual Negative Cells	99.6902		Tumor: % Dual Negative Cells	99.2133		Tumor: % Dual Negative Cells	99.7214		Tumor: % Dual Negative Cells	97.7829		Tumor: % Dual Negative Cells	96.3724		Tumor: % Dual Negative Cells	96.9378		Tumor: % Dual Negative Cells	99.8986
		Tumor: Avg Stain 1 Nuclear OD	0.0308455		Tumor: Avg Stain 1 Nuclear OD	0.0322348		Tumor: Avg Stain 1 Nuclear OD	0.0323311		Tumor: Avg Stain 1 Nuclear OD	0.0305414		Tumor: Avg Stain 1 Nuclear OD	0.0415742		Tumor: Avg Stain 1 Nuclear OD	0.0514385		Tumor: Avg Stain 1 Nuclear OD	0.0480549		Tumor: Avg Stain 1 Nuclear OD	0.0308285
		Tumor: Avg Stain 2 Nuclear OD	0.0369059		Tumor: Avg Stain 2 Nuclear OD	0.0369794		Tumor: Avg Stain 2 Nuclear OD	0.037604		Tumor: Avg Stain 2 Nuclear OD	0.0368775		Tumor: Avg Stain 2 Nuclear OD	0.036229		Tumor: Avg Stain 2 Nuclear OD	0.0371384		Tumor: Avg Stain 2 Nuclear OD	0.0366093		Tumor: Avg Stain 2 Nuclear OD	0.0369893
		Tumor: Avg Stain 1 Cytoplasmic OD	0.0306863		Tumor: Avg Stain 1 Cytoplasmic OD	0.031451		Tumor: Avg Stain 1 Cytoplasmic OD	0.0301185		Tumor: Avg Stain 1 Cytoplasmic OD	0.0304672		Tumor: Avg Stain 1 Cytoplasmic OD	0.0323026		Tumor: Avg Stain 1 Cytoplasmic OD	0.0344593		Tumor: Avg Stain 1 Cytoplasmic OD	0.0340605		Tumor: Avg Stain 1 Cytoplasmic OD	0.0316845
		Tumor: Avg Stain 2 Cytoplasmic OD	0.0324059		Tumor: Avg Stain 2 Cytoplasmic OD	0.0321023		Tumor: Avg Stain 2 Cytoplasmic OD	0.0319661		Tumor: Avg Stain 2 Cytoplasmic OD	0.0320803		Tumor: Avg Stain 2 Cytoplasmic OD	0.0318449		Tumor: Avg Stain 2 Cytoplasmic OD	0.0319629		Tumor: Avg Stain 2 Cytoplasmic OD	0.031867		Tumor: Avg Stain 2 Cytoplasmic OD	0.0320632
		Tumor: Avg Cell Area (µm²)	84.4725		Tumor: Avg Cell Area (µm²)	82.4729		Tumor: Avg Cell Area (µm²)	78.05		Tumor: Avg Cell Area (µm²)	80.2031		Tumor: Avg Cell Area (µm²)	100.105		Tumor: Avg Cell Area (µm²)	92.2435		Tumor: Avg Cell Area (µm²)	87.8934		Tumor: Avg Cell Area (µm²)	81.2181
		Tumor: Avg Cytoplasm Area (µm²)	58.6558		Tumor: Avg Cytoplasm Area (µm²)	56.8094		Tumor: Avg Cytoplasm Area (µm²)	54.1137		Tumor: Avg Cytoplasm Area (µm²)	55.5445		Tumor: Avg Cytoplasm Area (µm²)	72.7865		Tumor: Avg Cytoplasm Area (µm²)	66.7074		Tumor: Avg Cytoplasm Area (µm²)	62.2475		Tumor: Avg Cytoplasm Area (µm²)	56.1159
		Tumor: Avg Nucleus Area (µm²)	25.8167		Tumor: Avg Nucleus Area (µm²)	25.6635		Tumor: Avg Nucleus Area (µm²)	23.9363		Tumor: Avg Nucleus Area (µm²)	24.6586		Tumor: Avg Nucleus Area (µm²)	27.3189		Tumor: Avg Nucleus Area (µm²)	25.5361		Tumor: Avg Nucleus Area (µm²)	25.6459		Tumor: Avg Nucleus Area (µm²)	25.1021
		Tumor: Avg Nucleus Perimeter (µm)	10.2388		Tumor: Avg Nucleus Perimeter (µm)	10.1671		Tumor: Avg Nucleus Perimeter (µm)	9.51362		Tumor: Avg Nucleus Perimeter (µm)	9.79916		Tumor: Avg Nucleus Perimeter (µm)	10.8146		Tumor: Avg Nucleus Perimeter (µm)	10.1231		Tumor: Avg Nucleus Perimeter (µm)	10.1442		Tumor: Avg Nucleus Perimeter (µm)	9.97587
		Tumor: Avg Nucleus Roundness	0.666929		Tumor: Avg Nucleus Roundness	0.669004		Tumor: Avg Nucleus Roundness	0.662923		Tumor: Avg Nucleus Roundness	0.674499		Tumor: Avg Nucleus Roundness	0.688114		Tumor: Avg Nucleus Roundness	0.681385		Tumor: Avg Nucleus Roundness	0.672384		Tumor: Avg Nucleus Roundness	0.67065
		Tumor: Tissue Area (µm²)	264072		Tumor: Tissue Area (µm²)	214564		Tumor: Tissue Area (µm²)	534753		Tumor: Tissue Area (µm²)	505038		Tumor: Tissue Area (µm²)	744681		Tumor: Tissue Area (µm²)	639037		Tumor: Tissue Area (µm²)	377243		Tumor: Tissue Area (µm²)	322764
		BSNA37.2b	HOM
		Name	Value		Name	Value		Name	Value		Name	Value		Name	Value		Name	Value		Name	Value		Name	Value
		Classified Area (mm²)	0.70316		Classified Area (mm²)	0.42511		Classified Area (mm²)	0.56224		Classified Area (mm²)	0.826		Classified Area (mm²)	0.44749		Classified Area (mm²)	0.67011		Classified Area (mm²)	0.81204		Classified Area (mm²)	0.83476
		Tumor Area (mm²)	0.68392		Tumor Area (mm²)	0.42185		Tumor Area (mm²)	0.56014		Tumor Area (mm²)	0.82206		Tumor Area (mm²)	0.41389		Tumor Area (mm²)	0.64897		Tumor Area (mm²)	0.75566		Tumor Area (mm²)	0.81782
		Necrosis Area (mm²)	0.00035		Necrosis Area (mm²)	0		Necrosis Area (mm²)	0		Necrosis Area (mm²)	0		Necrosis Area (mm²)	0		Necrosis Area (mm²)	0		Necrosis Area (mm²)	0		Necrosis Area (mm²)	0
		Empty Area (mm²)	0.01223		Empty Area (mm²)	0		Empty Area (mm²)	0		Empty Area (mm²)	0.00056		Empty Area (mm²)	3e-05		Empty Area (mm²)	0		Empty Area (mm²)	7e-05		Empty Area (mm²)	0.0003
		Normal Area (mm²)	0.00666		Normal Area (mm²)	0.00326		Normal Area (mm²)	0.0021		Normal Area (mm²)	0.00337		Normal Area (mm²)	0.03358		Normal Area (mm²)	0.02114		Normal Area (mm²)	0.05632		Normal Area (mm²)	0.01664
		Total Cells	3104		Total Cells	2125		Total Cells	2853		Total Cells	4068		Total Cells	2250		Total Cells	3197		Total Cells	4281		Total Cells	4502
		Stain 1 Positive Cells	112		Stain 1 Positive Cells	15		Stain 1 Positive Cells	19		Stain 1 Positive Cells	24		Stain 1 Positive Cells	10		Stain 1 Positive Cells	21		Stain 1 Positive Cells	35		Stain 1 Positive Cells	22
		Stain 1 0+ Cells	2992		Stain 1 0+ Cells	2110		Stain 1 0+ Cells	2834		Stain 1 0+ Cells	4044		Stain 1 0+ Cells	2240		Stain 1 0+ Cells	3176		Stain 1 0+ Cells	4246		Stain 1 0+ Cells	4480
		Stain 1 1+ Cells	49		Stain 1 1+ Cells	6		Stain 1 1+ Cells	11		Stain 1 1+ Cells	8		Stain 1 1+ Cells	4		Stain 1 1+ Cells	12		Stain 1 1+ Cells	17		Stain 1 1+ Cells	12
		Stain 1 2+ Cells	30		Stain 1 2+ Cells	3		Stain 1 2+ Cells	6		Stain 1 2+ Cells	11		Stain 1 2+ Cells	4		Stain 1 2+ Cells	8		Stain 1 2+ Cells	15		Stain 1 2+ Cells	6
		Stain 1 3+ Cells	33		Stain 1 3+ Cells	6		Stain 1 3+ Cells	2		Stain 1 3+ Cells	5		Stain 1 3+ Cells	2		Stain 1 3+ Cells	1		Stain 1 3+ Cells	3		Stain 1 3+ Cells	4
		Stain 2 Positive Cells	0		Stain 2 Positive Cells	0		Stain 2 Positive Cells	0		Stain 2 Positive Cells	0		Stain 2 Positive Cells	0		Stain 2 Positive Cells	0		Stain 2 Positive Cells	0		Stain 2 Positive Cells	0
		Stain 2 0+ Cells	3104		Stain 2 0+ Cells	2125		Stain 2 0+ Cells	2853		Stain 2 0+ Cells	4068		Stain 2 0+ Cells	2250		Stain 2 0+ Cells	3197		Stain 2 0+ Cells	4281		Stain 2 0+ Cells	4502
		Stain 2 1+ Cells	0		Stain 2 1+ Cells	0		Stain 2 1+ Cells	0		Stain 2 1+ Cells	0		Stain 2 1+ Cells	0		Stain 2 1+ Cells	0		Stain 2 1+ Cells	0		Stain 2 1+ Cells	0
		Stain 2 2+ Cells	0		Stain 2 2+ Cells	0		Stain 2 2+ Cells	0		Stain 2 2+ Cells	0		Stain 2 2+ Cells	0		Stain 2 2+ Cells	0		Stain 2 2+ Cells	0		Stain 2 2+ Cells	0
		Stain 2 3+ Cells	0		Stain 2 3+ Cells	0		Stain 2 3+ Cells	0		Stain 2 3+ Cells	0		Stain 2 3+ Cells	0		Stain 2 3+ Cells	0		Stain 2 3+ Cells	0		Stain 2 3+ Cells	0
		Dual Positive Cells	0		Dual Positive Cells	0		Dual Positive Cells	0		Dual Positive Cells	0		Dual Positive Cells	0		Dual Positive Cells	0		Dual Positive Cells	0		Dual Positive Cells	0
		Dual Negative Cells	2992		Dual Negative Cells	2110		Dual Negative Cells	2834		Dual Negative Cells	4044		Dual Negative Cells	2240		Dual Negative Cells	3176		Dual Negative Cells	4246		Dual Negative Cells	4480
		% Stain 1 Positive Cells	3.60825		% Stain 1 Positive Cells	0.705882		% Stain 1 Positive Cells	0.665966		% Stain 1 Positive Cells	0.589971		% Stain 1 Positive Cells	0.444444		% Stain 1 Positive Cells	0.656866		% Stain 1 Positive Cells	0.817566		% Stain 1 Positive Cells	0.488672
		% Stain 1 0+ Cells	96.3918		% Stain 1 0+ Cells	99.2941		% Stain 1 0+ Cells	99.334		% Stain 1 0+ Cells	99.41		% Stain 1 0+ Cells	99.5556		% Stain 1 0+ Cells	99.3431		% Stain 1 0+ Cells	99.1824		% Stain 1 0+ Cells	99.5113
		% Stain 1 1+ Cells	1.57861		% Stain 1 1+ Cells	0.282353		% Stain 1 1+ Cells	0.385559		% Stain 1 1+ Cells	0.196657		% Stain 1 1+ Cells	0.177778		% Stain 1 1+ Cells	0.375352		% Stain 1 1+ Cells	0.397103		% Stain 1 1+ Cells	0.266548
		% Stain 1 2+ Cells	0.966495		% Stain 1 2+ Cells	0.141176		% Stain 1 2+ Cells	0.210305		% Stain 1 2+ Cells	0.270403		% Stain 1 2+ Cells	0.177778		% Stain 1 2+ Cells	0.250235		% Stain 1 2+ Cells	0.350385		% Stain 1 2+ Cells	0.133274
		% Stain 1 3+ Cells	1.06314		% Stain 1 3+ Cells	0.282353		% Stain 1 3+ Cells	0.0701016		% Stain 1 3+ Cells	0.122911		% Stain 1 3+ Cells	0.0888889		% Stain 1 3+ Cells	0.0312793		% Stain 1 3+ Cells	0.0700771		% Stain 1 3+ Cells	0.0888494
		Stain 1 H-Score	6.70103		Stain 1 H-Score	1.41176		Stain 1 H-Score	1.01647		Stain 1 H-Score	1.10619		Stain 1 H-Score	0.8		Stain 1 H-Score	0.969659		Stain 1 H-Score	1.30811		Stain 1 H-Score	0.799645
		% Stain 2 Positive Cells	0		% Stain 2 Positive Cells	0		% Stain 2 Positive Cells	0		% Stain 2 Positive Cells	0		% Stain 2 Positive Cells	0		% Stain 2 Positive Cells	0		% Stain 2 Positive Cells	0		% Stain 2 Positive Cells	0
		% Stain 2 0+ Cells	100		% Stain 2 0+ Cells	100		% Stain 2 0+ Cells	100		% Stain 2 0+ Cells	100		% Stain 2 0+ Cells	100		% Stain 2 0+ Cells	100		% Stain 2 0+ Cells	100		% Stain 2 0+ Cells	100
		% Stain 2 1+ Cells	0		% Stain 2 1+ Cells	0		% Stain 2 1+ Cells	0		% Stain 2 1+ Cells	0		% Stain 2 1+ Cells	0		% Stain 2 1+ Cells	0		% Stain 2 1+ Cells	0		% Stain 2 1+ Cells	0
		% Stain 2 2+ Cells	0		% Stain 2 2+ Cells	0		% Stain 2 2+ Cells	0		% Stain 2 2+ Cells	0		% Stain 2 2+ Cells	0		% Stain 2 2+ Cells	0		% Stain 2 2+ Cells	0		% Stain 2 2+ Cells	0
		% Stain 2 3+ Cells	0		% Stain 2 3+ Cells	0		% Stain 2 3+ Cells	0		% Stain 2 3+ Cells	0		% Stain 2 3+ Cells	0		% Stain 2 3+ Cells	0		% Stain 2 3+ Cells	0		% Stain 2 3+ Cells	0
		Stain 2 H-Score	0		Stain 2 H-Score	0		Stain 2 H-Score	0		Stain 2 H-Score	0		Stain 2 H-Score	0		Stain 2 H-Score	0		Stain 2 H-Score	0		Stain 2 H-Score	0
		% Dual Positive Cells	0		% Dual Positive Cells	0		% Dual Positive Cells	0		% Dual Positive Cells	0		% Dual Positive Cells	0		% Dual Positive Cells	0		% Dual Positive Cells	0		% Dual Positive Cells	0
		% Dual Negative Cells	96.3918		% Dual Negative Cells	99.2941		% Dual Negative Cells	99.334		% Dual Negative Cells	99.41		% Dual Negative Cells	99.5556		% Dual Negative Cells	99.3431		% Dual Negative Cells	99.1824		% Dual Negative Cells	99.5113
		Avg Stain 1 Nuclear OD	0.0495585		Avg Stain 1 Nuclear OD	0.032913		Avg Stain 1 Nuclear OD	0.0322371		Avg Stain 1 Nuclear OD	0.0315454		Avg Stain 1 Nuclear OD	0.0303569		Avg Stain 1 Nuclear OD	0.0321063		Avg Stain 1 Nuclear OD	0.0321965		Avg Stain 1 Nuclear OD	0.0302765
		Avg Stain 2 Nuclear OD	0.0361447		Avg Stain 2 Nuclear OD	0.0349036		Avg Stain 2 Nuclear OD	0.0351286		Avg Stain 2 Nuclear OD	0.0356928		Avg Stain 2 Nuclear OD	0.035188		Avg Stain 2 Nuclear OD	0.0351179		Avg Stain 2 Nuclear OD	0.0363028		Avg Stain 2 Nuclear OD	0.0370572
		Avg Stain 1 Cytoplasmic OD	0.0340205		Avg Stain 1 Cytoplasmic OD	0.0306258		Avg Stain 1 Cytoplasmic OD	0.0301524		Avg Stain 1 Cytoplasmic OD	0.0296656		Avg Stain 1 Cytoplasmic OD	0.0295606		Avg Stain 1 Cytoplasmic OD	0.0295349		Avg Stain 1 Cytoplasmic OD	0.0296376		Avg Stain 1 Cytoplasmic OD	0.0294519
		Avg Stain 2 Cytoplasmic OD	0.0315726		Avg Stain 2 Cytoplasmic OD	0.0314514		Avg Stain 2 Cytoplasmic OD	0.0316675		Avg Stain 2 Cytoplasmic OD	0.0319144		Avg Stain 2 Cytoplasmic OD	0.0318588		Avg Stain 2 Cytoplasmic OD	0.0322286		Avg Stain 2 Cytoplasmic OD	0.0324119		Avg Stain 2 Cytoplasmic OD	0.0322045
		Avg Cell Area (µm²)	96.0195		Avg Cell Area (µm²)	99.5843		Avg Cell Area (µm²)	97.1154		Avg Cell Area (µm²)	96.158		Avg Cell Area (µm²)	93.2929		Avg Cell Area (µm²)	98.9996		Avg Cell Area (µm²)	92.2853		Avg Cell Area (µm²)	88.8665
		Avg Cytoplasm Area (µm²)	66.4108		Avg Cytoplasm Area (µm²)	69.1786		Avg Cytoplasm Area (µm²)	67.9435		Avg Cytoplasm Area (µm²)	66.8269		Avg Cytoplasm Area (µm²)	63.6908		Avg Cytoplasm Area (µm²)	70.0266		Avg Cytoplasm Area (µm²)	62.8164		Avg Cytoplasm Area (µm²)	60.9439
		Avg Nucleus Area (µm²)	29.6087		Avg Nucleus Area (µm²)	30.4057		Avg Nucleus Area (µm²)	29.1719		Avg Nucleus Area (µm²)	29.3311		Avg Nucleus Area (µm²)	29.6021		Avg Nucleus Area (µm²)	28.973		Avg Nucleus Area (µm²)	29.469		Avg Nucleus Area (µm²)	27.9226
		Avg Nucleus Perimeter (µm)	11.7113		Avg Nucleus Perimeter (µm)	12.046		Avg Nucleus Perimeter (µm)	11.5718		Avg Nucleus Perimeter (µm)	11.6241		Avg Nucleus Perimeter (µm)	11.7355		Avg Nucleus Perimeter (µm)	11.4839		Avg Nucleus Perimeter (µm)	11.6814		Avg Nucleus Perimeter (µm)	11.0756
		Avg Nucleus Roundness	0.678738		Avg Nucleus Roundness	0.684252		Avg Nucleus Roundness	0.67668		Avg Nucleus Roundness	0.676637		Avg Nucleus Roundness	0.676967		Avg Nucleus Roundness	0.686652		Avg Nucleus Roundness	0.677305		Avg Nucleus Roundness	0.670719
		Tissue Area (µm²)	597057		Tissue Area (µm²)	423177		Tissue Area (µm²)	561503		Tissue Area (µm²)	800065		Tissue Area (µm²)	418888		Tissue Area (µm²)	651789		Tissue Area (µm²)	765352		Tissue Area (µm²)	788034
		Tumor: Total Cells	3104		Tumor: Total Cells	2125		Tumor: Total Cells	2853		Tumor: Total Cells	4068		Tumor: Total Cells	2250		Tumor: Total Cells	3197		Tumor: Total Cells	4281		Tumor: Total Cells	4502
		Tumor: Stain 1 Positive Cells	112		Tumor: Stain 1 Positive Cells	15		Tumor: Stain 1 Positive Cells	19		Tumor: Stain 1 Positive Cells	24		Tumor: Stain 1 Positive Cells	10		Tumor: Stain 1 Positive Cells	21		Tumor: Stain 1 Positive Cells	35		Tumor: Stain 1 Positive Cells	22
		Tumor: Stain 1 0+ Cells	2992		Tumor: Stain 1 0+ Cells	2110		Tumor: Stain 1 0+ Cells	2834		Tumor: Stain 1 0+ Cells	4044		Tumor: Stain 1 0+ Cells	2240		Tumor: Stain 1 0+ Cells	3176		Tumor: Stain 1 0+ Cells	4246		Tumor: Stain 1 0+ Cells	4480
		Tumor: Stain 1 1+ Cells	49		Tumor: Stain 1 1+ Cells	6		Tumor: Stain 1 1+ Cells	11		Tumor: Stain 1 1+ Cells	8		Tumor: Stain 1 1+ Cells	4		Tumor: Stain 1 1+ Cells	12		Tumor: Stain 1 1+ Cells	17		Tumor: Stain 1 1+ Cells	12
		Tumor: Stain 1 2+ Cells	30		Tumor: Stain 1 2+ Cells	3		Tumor: Stain 1 2+ Cells	6		Tumor: Stain 1 2+ Cells	11		Tumor: Stain 1 2+ Cells	4		Tumor: Stain 1 2+ Cells	8		Tumor: Stain 1 2+ Cells	15		Tumor: Stain 1 2+ Cells	6
		Tumor: Stain 1 3+ Cells	33		Tumor: Stain 1 3+ Cells	6		Tumor: Stain 1 3+ Cells	2		Tumor: Stain 1 3+ Cells	5		Tumor: Stain 1 3+ Cells	2		Tumor: Stain 1 3+ Cells	1		Tumor: Stain 1 3+ Cells	3		Tumor: Stain 1 3+ Cells	4
		Tumor: Stain 2 Positive Cells	0		Tumor: Stain 2 Positive Cells	0		Tumor: Stain 2 Positive Cells	0		Tumor: Stain 2 Positive Cells	0		Tumor: Stain 2 Positive Cells	0		Tumor: Stain 2 Positive Cells	0		Tumor: Stain 2 Positive Cells	0		Tumor: Stain 2 Positive Cells	0
		Tumor: Stain 2 0+ Cells	3104		Tumor: Stain 2 0+ Cells	2125		Tumor: Stain 2 0+ Cells	2853		Tumor: Stain 2 0+ Cells	4068		Tumor: Stain 2 0+ Cells	2250		Tumor: Stain 2 0+ Cells	3197		Tumor: Stain 2 0+ Cells	4281		Tumor: Stain 2 0+ Cells	4502
		Tumor: Stain 2 1+ Cells	0		Tumor: Stain 2 1+ Cells	0		Tumor: Stain 2 1+ Cells	0		Tumor: Stain 2 1+ Cells	0		Tumor: Stain 2 1+ Cells	0		Tumor: Stain 2 1+ Cells	0		Tumor: Stain 2 1+ Cells	0		Tumor: Stain 2 1+ Cells	0
		Tumor: Stain 2 2+ Cells	0		Tumor: Stain 2 2+ Cells	0		Tumor: Stain 2 2+ Cells	0		Tumor: Stain 2 2+ Cells	0		Tumor: Stain 2 2+ Cells	0		Tumor: Stain 2 2+ Cells	0		Tumor: Stain 2 2+ Cells	0		Tumor: Stain 2 2+ Cells	0
		Tumor: Stain 2 3+ Cells	0		Tumor: Stain 2 3+ Cells	0		Tumor: Stain 2 3+ Cells	0		Tumor: Stain 2 3+ Cells	0		Tumor: Stain 2 3+ Cells	0		Tumor: Stain 2 3+ Cells	0		Tumor: Stain 2 3+ Cells	0		Tumor: Stain 2 3+ Cells	0
		Tumor: Dual Positive Cells	0		Tumor: Dual Positive Cells	0		Tumor: Dual Positive Cells	0		Tumor: Dual Positive Cells	0		Tumor: Dual Positive Cells	0		Tumor: Dual Positive Cells	0		Tumor: Dual Positive Cells	0		Tumor: Dual Positive Cells	0
		Tumor: Dual Negative Cells	2992		Tumor: Dual Negative Cells	2110		Tumor: Dual Negative Cells	2834		Tumor: Dual Negative Cells	4044		Tumor: Dual Negative Cells	2240		Tumor: Dual Negative Cells	3176		Tumor: Dual Negative Cells	4246		Tumor: Dual Negative Cells	4480
		Tumor: % Stain 1 Positive Cells	3.60825		Tumor: % Stain 1 Positive Cells	0.705882		Tumor: % Stain 1 Positive Cells	0.665966		Tumor: % Stain 1 Positive Cells	0.589971		Tumor: % Stain 1 Positive Cells	0.444444		Tumor: % Stain 1 Positive Cells	0.656866		Tumor: % Stain 1 Positive Cells	0.817566		Tumor: % Stain 1 Positive Cells	0.488672		0.997202
		Tumor: % Stain 1 0+ Cells	96.3918		Tumor: % Stain 1 0+ Cells	99.2941		Tumor: % Stain 1 0+ Cells	99.334		Tumor: % Stain 1 0+ Cells	99.41		Tumor: % Stain 1 0+ Cells	99.5556		Tumor: % Stain 1 0+ Cells	99.3431		Tumor: % Stain 1 0+ Cells	99.1824		Tumor: % Stain 1 0+ Cells	99.5113
		Tumor: % Stain 1 1+ Cells	1.57861		Tumor: % Stain 1 1+ Cells	0.282353		Tumor: % Stain 1 1+ Cells	0.385559		Tumor: % Stain 1 1+ Cells	0.196657		Tumor: % Stain 1 1+ Cells	0.177778		Tumor: % Stain 1 1+ Cells	0.375352		Tumor: % Stain 1 1+ Cells	0.397103		Tumor: % Stain 1 1+ Cells	0.266548
		Tumor: % Stain 1 2+ Cells	0.966495		Tumor: % Stain 1 2+ Cells	0.141176		Tumor: % Stain 1 2+ Cells	0.210305		Tumor: % Stain 1 2+ Cells	0.270403		Tumor: % Stain 1 2+ Cells	0.177778		Tumor: % Stain 1 2+ Cells	0.250235		Tumor: % Stain 1 2+ Cells	0.350385		Tumor: % Stain 1 2+ Cells	0.133274
		Tumor: % Stain 1 3+ Cells	1.06314		Tumor: % Stain 1 3+ Cells	0.282353		Tumor: % Stain 1 3+ Cells	0.0701016		Tumor: % Stain 1 3+ Cells	0.122911		Tumor: % Stain 1 3+ Cells	0.0888889		Tumor: % Stain 1 3+ Cells	0.0312793		Tumor: % Stain 1 3+ Cells	0.0700771		Tumor: % Stain 1 3+ Cells	0.0888494
		Tumor: Stain 1 H-Score	6.70103		Tumor: Stain 1 H-Score	1.41176		Tumor: Stain 1 H-Score	1.01647		Tumor: Stain 1 H-Score	1.10619		Tumor: Stain 1 H-Score	0.8		Tumor: Stain 1 H-Score	0.969659		Tumor: Stain 1 H-Score	1.30811		Tumor: Stain 1 H-Score	0.799645
		Tumor: % Stain 2 Positive Cells	0		Tumor: % Stain 2 Positive Cells	0		Tumor: % Stain 2 Positive Cells	0		Tumor: % Stain 2 Positive Cells	0		Tumor: % Stain 2 Positive Cells	0		Tumor: % Stain 2 Positive Cells	0		Tumor: % Stain 2 Positive Cells	0		Tumor: % Stain 2 Positive Cells	0
		Tumor: % Stain 2 0+ Cells	100		Tumor: % Stain 2 0+ Cells	100		Tumor: % Stain 2 0+ Cells	100		Tumor: % Stain 2 0+ Cells	100		Tumor: % Stain 2 0+ Cells	100		Tumor: % Stain 2 0+ Cells	100		Tumor: % Stain 2 0+ Cells	100		Tumor: % Stain 2 0+ Cells	100
		Tumor: % Stain 2 1+ Cells	0		Tumor: % Stain 2 1+ Cells	0		Tumor: % Stain 2 1+ Cells	0		Tumor: % Stain 2 1+ Cells	0		Tumor: % Stain 2 1+ Cells	0		Tumor: % Stain 2 1+ Cells	0		Tumor: % Stain 2 1+ Cells	0		Tumor: % Stain 2 1+ Cells	0
		Tumor: % Stain 2 2+ Cells	0		Tumor: % Stain 2 2+ Cells	0		Tumor: % Stain 2 2+ Cells	0		Tumor: % Stain 2 2+ Cells	0		Tumor: % Stain 2 2+ Cells	0		Tumor: % Stain 2 2+ Cells	0		Tumor: % Stain 2 2+ Cells	0		Tumor: % Stain 2 2+ Cells	0
		Tumor: % Stain 2 3+ Cells	0		Tumor: % Stain 2 3+ Cells	0		Tumor: % Stain 2 3+ Cells	0		Tumor: % Stain 2 3+ Cells	0		Tumor: % Stain 2 3+ Cells	0		Tumor: % Stain 2 3+ Cells	0		Tumor: % Stain 2 3+ Cells	0		Tumor: % Stain 2 3+ Cells	0
		Tumor: Stain 2 H-Score	0		Tumor: Stain 2 H-Score	0		Tumor: Stain 2 H-Score	0		Tumor: Stain 2 H-Score	0		Tumor: Stain 2 H-Score	0		Tumor: Stain 2 H-Score	0		Tumor: Stain 2 H-Score	0		Tumor: Stain 2 H-Score	0
		Tumor: % Dual Positive Cells	0		Tumor: % Dual Positive Cells	0		Tumor: % Dual Positive Cells	0		Tumor: % Dual Positive Cells	0		Tumor: % Dual Positive Cells	0		Tumor: % Dual Positive Cells	0		Tumor: % Dual Positive Cells	0		Tumor: % Dual Positive Cells	0
		Tumor: % Dual Negative Cells	96.3918		Tumor: % Dual Negative Cells	99.2941		Tumor: % Dual Negative Cells	99.334		Tumor: % Dual Negative Cells	99.41		Tumor: % Dual Negative Cells	99.5556		Tumor: % Dual Negative Cells	99.3431		Tumor: % Dual Negative Cells	99.1824		Tumor: % Dual Negative Cells	99.5113
		Tumor: Avg Stain 1 Nuclear OD	0.0495585		Tumor: Avg Stain 1 Nuclear OD	0.032913		Tumor: Avg Stain 1 Nuclear OD	0.0322371		Tumor: Avg Stain 1 Nuclear OD	0.0315454		Tumor: Avg Stain 1 Nuclear OD	0.0303569		Tumor: Avg Stain 1 Nuclear OD	0.0321063		Tumor: Avg Stain 1 Nuclear OD	0.0321965		Tumor: Avg Stain 1 Nuclear OD	0.0302765
		Tumor: Avg Stain 2 Nuclear OD	0.0361447		Tumor: Avg Stain 2 Nuclear OD	0.0349036		Tumor: Avg Stain 2 Nuclear OD	0.0351286		Tumor: Avg Stain 2 Nuclear OD	0.0356928		Tumor: Avg Stain 2 Nuclear OD	0.035188		Tumor: Avg Stain 2 Nuclear OD	0.0351179		Tumor: Avg Stain 2 Nuclear OD	0.0363028		Tumor: Avg Stain 2 Nuclear OD	0.0370572
		Tumor: Avg Stain 1 Cytoplasmic OD	0.0340205		Tumor: Avg Stain 1 Cytoplasmic OD	0.0306258		Tumor: Avg Stain 1 Cytoplasmic OD	0.0301524		Tumor: Avg Stain 1 Cytoplasmic OD	0.0296656		Tumor: Avg Stain 1 Cytoplasmic OD	0.0295606		Tumor: Avg Stain 1 Cytoplasmic OD	0.0295349		Tumor: Avg Stain 1 Cytoplasmic OD	0.0296376		Tumor: Avg Stain 1 Cytoplasmic OD	0.0294519
		Tumor: Avg Stain 2 Cytoplasmic OD	0.0315726		Tumor: Avg Stain 2 Cytoplasmic OD	0.0314514		Tumor: Avg Stain 2 Cytoplasmic OD	0.0316675		Tumor: Avg Stain 2 Cytoplasmic OD	0.0319144		Tumor: Avg Stain 2 Cytoplasmic OD	0.0318588		Tumor: Avg Stain 2 Cytoplasmic OD	0.0322286		Tumor: Avg Stain 2 Cytoplasmic OD	0.0324119		Tumor: Avg Stain 2 Cytoplasmic OD	0.0322045
		Tumor: Avg Cell Area (µm²)	96.0195		Tumor: Avg Cell Area (µm²)	99.5843		Tumor: Avg Cell Area (µm²)	97.1154		Tumor: Avg Cell Area (µm²)	96.158		Tumor: Avg Cell Area (µm²)	93.2929		Tumor: Avg Cell Area (µm²)	98.9996		Tumor: Avg Cell Area (µm²)	92.2853		Tumor: Avg Cell Area (µm²)	88.8665
		Tumor: Avg Cytoplasm Area (µm²)	66.4108		Tumor: Avg Cytoplasm Area (µm²)	69.1786		Tumor: Avg Cytoplasm Area (µm²)	67.9435		Tumor: Avg Cytoplasm Area (µm²)	66.8269		Tumor: Avg Cytoplasm Area (µm²)	63.6908		Tumor: Avg Cytoplasm Area (µm²)	70.0266		Tumor: Avg Cytoplasm Area (µm²)	62.8164		Tumor: Avg Cytoplasm Area (µm²)	60.9439
		Tumor: Avg Nucleus Area (µm²)	29.6087		Tumor: Avg Nucleus Area (µm²)	30.4057		Tumor: Avg Nucleus Area (µm²)	29.1719		Tumor: Avg Nucleus Area (µm²)	29.3311		Tumor: Avg Nucleus Area (µm²)	29.6021		Tumor: Avg Nucleus Area (µm²)	28.973		Tumor: Avg Nucleus Area (µm²)	29.469		Tumor: Avg Nucleus Area (µm²)	27.9226
		Tumor: Avg Nucleus Perimeter (µm)	11.7113		Tumor: Avg Nucleus Perimeter (µm)	12.046		Tumor: Avg Nucleus Perimeter (µm)	11.5718		Tumor: Avg Nucleus Perimeter (µm)	11.6241		Tumor: Avg Nucleus Perimeter (µm)	11.7355		Tumor: Avg Nucleus Perimeter (µm)	11.4839		Tumor: Avg Nucleus Perimeter (µm)	11.6814		Tumor: Avg Nucleus Perimeter (µm)	11.0756
		Tumor: Avg Nucleus Roundness	0.678738		Tumor: Avg Nucleus Roundness	0.684252		Tumor: Avg Nucleus Roundness	0.67668		Tumor: Avg Nucleus Roundness	0.676637		Tumor: Avg Nucleus Roundness	0.676967		Tumor: Avg Nucleus Roundness	0.686652		Tumor: Avg Nucleus Roundness	0.677305		Tumor: Avg Nucleus Roundness	0.670719
		Tumor: Tissue Area (µm²)	597057		Tumor: Tissue Area (µm²)	423177		Tumor: Tissue Area (µm²)	561503		Tumor: Tissue Area (µm²)	800065		Tumor: Tissue Area (µm²)	418888		Tumor: Tissue Area (µm²)	651789		Tumor: Tissue Area (µm²)	765352		Tumor: Tissue Area (µm²)	788034
		BSNA7.2d	WT
		Name	Value		Name	Value		Name	Value		Name	Value		Name	Value		Name	Value		Name	Value		Name	Value
		Classified Area (mm²)	0.93837		Classified Area (mm²)	1.07955		Classified Area (mm²)	0.76238		Classified Area (mm²)	0.77194		Classified Area (mm²)	1.02701		Classified Area (mm²)	1.54954		Classified Area (mm²)	1.00745		Classified Area (mm²)	0.98071
		Tumor Area (mm²)	0.93087		Tumor Area (mm²)	1.02011		Tumor Area (mm²)	0.75255		Tumor Area (mm²)	0.75995		Tumor Area (mm²)	0.98526		Tumor Area (mm²)	1.50306		Tumor Area (mm²)	0.87713		Tumor Area (mm²)	0.92889
		Necrosis Area (mm²)	0		Necrosis Area (mm²)	0		Necrosis Area (mm²)	0		Necrosis Area (mm²)	0		Necrosis Area (mm²)	0		Necrosis Area (mm²)	0		Necrosis Area (mm²)	0		Necrosis Area (mm²)	0
		Empty Area (mm²)	0		Empty Area (mm²)	0		Empty Area (mm²)	0		Empty Area (mm²)	0		Empty Area (mm²)	0		Empty Area (mm²)	0.0003		Empty Area (mm²)	0		Empty Area (mm²)	0
		Normal Area (mm²)	0.0075		Normal Area (mm²)	0.05944		Normal Area (mm²)	0.00983		Normal Area (mm²)	0.01199		Normal Area (mm²)	0.04174		Normal Area (mm²)	0.04619		Normal Area (mm²)	0.13032		Normal Area (mm²)	0.05182
		Total Cells	4700		Total Cells	5705		Total Cells	4191		Total Cells	3751		Total Cells	5551		Total Cells	7805		Total Cells	4961		Total Cells	5218
		Stain 1 Positive Cells	18		Stain 1 Positive Cells	11		Stain 1 Positive Cells	29		Stain 1 Positive Cells	14		Stain 1 Positive Cells	23		Stain 1 Positive Cells	10		Stain 1 Positive Cells	8		Stain 1 Positive Cells	38
		Stain 1 0+ Cells	4682		Stain 1 0+ Cells	5694		Stain 1 0+ Cells	4162		Stain 1 0+ Cells	3737		Stain 1 0+ Cells	5528		Stain 1 0+ Cells	7795		Stain 1 0+ Cells	4953		Stain 1 0+ Cells	5180
		Stain 1 1+ Cells	10		Stain 1 1+ Cells	5		Stain 1 1+ Cells	14		Stain 1 1+ Cells	12		Stain 1 1+ Cells	11		Stain 1 1+ Cells	5		Stain 1 1+ Cells	5		Stain 1 1+ Cells	18
		Stain 1 2+ Cells	4		Stain 1 2+ Cells	4		Stain 1 2+ Cells	10		Stain 1 2+ Cells	2		Stain 1 2+ Cells	7		Stain 1 2+ Cells	3		Stain 1 2+ Cells	2		Stain 1 2+ Cells	17
		Stain 1 3+ Cells	4		Stain 1 3+ Cells	2		Stain 1 3+ Cells	5		Stain 1 3+ Cells	0		Stain 1 3+ Cells	5		Stain 1 3+ Cells	2		Stain 1 3+ Cells	1		Stain 1 3+ Cells	3
		Stain 2 Positive Cells	0		Stain 2 Positive Cells	0		Stain 2 Positive Cells	0		Stain 2 Positive Cells	0		Stain 2 Positive Cells	0		Stain 2 Positive Cells	0		Stain 2 Positive Cells	0		Stain 2 Positive Cells	0
		Stain 2 0+ Cells	4700		Stain 2 0+ Cells	5705		Stain 2 0+ Cells	4191		Stain 2 0+ Cells	3751		Stain 2 0+ Cells	5551		Stain 2 0+ Cells	7805		Stain 2 0+ Cells	4961		Stain 2 0+ Cells	5218
		Stain 2 1+ Cells	0		Stain 2 1+ Cells	0		Stain 2 1+ Cells	0		Stain 2 1+ Cells	0		Stain 2 1+ Cells	0		Stain 2 1+ Cells	0		Stain 2 1+ Cells	0		Stain 2 1+ Cells	0
		Stain 2 2+ Cells	0		Stain 2 2+ Cells	0		Stain 2 2+ Cells	0		Stain 2 2+ Cells	0		Stain 2 2+ Cells	0		Stain 2 2+ Cells	0		Stain 2 2+ Cells	0		Stain 2 2+ Cells	0
		Stain 2 3+ Cells	0		Stain 2 3+ Cells	0		Stain 2 3+ Cells	0		Stain 2 3+ Cells	0		Stain 2 3+ Cells	0		Stain 2 3+ Cells	0		Stain 2 3+ Cells	0		Stain 2 3+ Cells	0
		Dual Positive Cells	0		Dual Positive Cells	0		Dual Positive Cells	0		Dual Positive Cells	0		Dual Positive Cells	0		Dual Positive Cells	0		Dual Positive Cells	0		Dual Positive Cells	0
		Dual Negative Cells	4682		Dual Negative Cells	5694		Dual Negative Cells	4162		Dual Negative Cells	3737		Dual Negative Cells	5528		Dual Negative Cells	7795		Dual Negative Cells	4953		Dual Negative Cells	5180
		% Stain 1 Positive Cells	0.382979		% Stain 1 Positive Cells	0.192813		% Stain 1 Positive Cells	0.691959		% Stain 1 Positive Cells	0.373234		% Stain 1 Positive Cells	0.41434		% Stain 1 Positive Cells	0.128123		% Stain 1 Positive Cells	0.161258		% Stain 1 Positive Cells	0.728248
		% Stain 1 0+ Cells	99.617		% Stain 1 0+ Cells	99.8072		% Stain 1 0+ Cells	99.308		% Stain 1 0+ Cells	99.6268		% Stain 1 0+ Cells	99.5857		% Stain 1 0+ Cells	99.8719		% Stain 1 0+ Cells	99.8387		% Stain 1 0+ Cells	99.2718
		% Stain 1 1+ Cells	0.212766		% Stain 1 1+ Cells	0.0876424		% Stain 1 1+ Cells	0.334049		% Stain 1 1+ Cells	0.319915		% Stain 1 1+ Cells	0.198162		% Stain 1 1+ Cells	0.0640615		% Stain 1 1+ Cells	0.100786		% Stain 1 1+ Cells	0.34496
		% Stain 1 2+ Cells	0.0851064		% Stain 1 2+ Cells	0.0701139		% Stain 1 2+ Cells	0.238607		% Stain 1 2+ Cells	0.0533191		% Stain 1 2+ Cells	0.126103		% Stain 1 2+ Cells	0.0384369		% Stain 1 2+ Cells	0.0403145		% Stain 1 2+ Cells	0.325795
		% Stain 1 3+ Cells	0.0851064		% Stain 1 3+ Cells	0.035057		% Stain 1 3+ Cells	0.119303		% Stain 1 3+ Cells	0		% Stain 1 3+ Cells	0.0900739		% Stain 1 3+ Cells	0.0256246		% Stain 1 3+ Cells	0.0201572		% Stain 1 3+ Cells	0.0574933
		Stain 1 H-Score	0.638298		Stain 1 H-Score	0.333041		Stain 1 H-Score	1.16917		Stain 1 H-Score	0.426553		Stain 1 H-Score	0.720591		Stain 1 H-Score	0.217809		Stain 1 H-Score	0.241887		Stain 1 H-Score	1.16903
		% Stain 2 Positive Cells	0		% Stain 2 Positive Cells	0		% Stain 2 Positive Cells	0		% Stain 2 Positive Cells	0		% Stain 2 Positive Cells	0		% Stain 2 Positive Cells	0		% Stain 2 Positive Cells	0		% Stain 2 Positive Cells	0
		% Stain 2 0+ Cells	100		% Stain 2 0+ Cells	100		% Stain 2 0+ Cells	100		% Stain 2 0+ Cells	100		% Stain 2 0+ Cells	100		% Stain 2 0+ Cells	100		% Stain 2 0+ Cells	100		% Stain 2 0+ Cells	100
		% Stain 2 1+ Cells	0		% Stain 2 1+ Cells	0		% Stain 2 1+ Cells	0		% Stain 2 1+ Cells	0		% Stain 2 1+ Cells	0		% Stain 2 1+ Cells	0		% Stain 2 1+ Cells	0		% Stain 2 1+ Cells	0
		% Stain 2 2+ Cells	0		% Stain 2 2+ Cells	0		% Stain 2 2+ Cells	0		% Stain 2 2+ Cells	0		% Stain 2 2+ Cells	0		% Stain 2 2+ Cells	0		% Stain 2 2+ Cells	0		% Stain 2 2+ Cells	0
		% Stain 2 3+ Cells	0		% Stain 2 3+ Cells	0		% Stain 2 3+ Cells	0		% Stain 2 3+ Cells	0		% Stain 2 3+ Cells	0		% Stain 2 3+ Cells	0		% Stain 2 3+ Cells	0		% Stain 2 3+ Cells	0
		Stain 2 H-Score	0		Stain 2 H-Score	0		Stain 2 H-Score	0		Stain 2 H-Score	0		Stain 2 H-Score	0		Stain 2 H-Score	0		Stain 2 H-Score	0		Stain 2 H-Score	0
		% Dual Positive Cells	0		% Dual Positive Cells	0		% Dual Positive Cells	0		% Dual Positive Cells	0		% Dual Positive Cells	0		% Dual Positive Cells	0		% Dual Positive Cells	0		% Dual Positive Cells	0
		% Dual Negative Cells	99.617		% Dual Negative Cells	99.8072		% Dual Negative Cells	99.308		% Dual Negative Cells	99.6268		% Dual Negative Cells	99.5857		% Dual Negative Cells	99.8719		% Dual Negative Cells	99.8387		% Dual Negative Cells	99.2718
		Avg Stain 1 Nuclear OD	0.0298857		Avg Stain 1 Nuclear OD	0.0282927		Avg Stain 1 Nuclear OD	0.0314872		Avg Stain 1 Nuclear OD	0.0290382		Avg Stain 1 Nuclear OD	0.0314782		Avg Stain 1 Nuclear OD	0.0282007		Avg Stain 1 Nuclear OD	0.0279245		Avg Stain 1 Nuclear OD	0.0316341
		Avg Stain 2 Nuclear OD	0.0376762		Avg Stain 2 Nuclear OD	0.0383009		Avg Stain 2 Nuclear OD	0.0387002		Avg Stain 2 Nuclear OD	0.0375578		Avg Stain 2 Nuclear OD	0.0345188		Avg Stain 2 Nuclear OD	0.0365316		Avg Stain 2 Nuclear OD	0.0379293		Avg Stain 2 Nuclear OD	0.0380505
		Avg Stain 1 Cytoplasmic OD	0.0287609		Avg Stain 1 Cytoplasmic OD	0.0283749		Avg Stain 1 Cytoplasmic OD	0.0289588		Avg Stain 1 Cytoplasmic OD	0.0284997		Avg Stain 1 Cytoplasmic OD	0.0298955		Avg Stain 1 Cytoplasmic OD	0.0283762		Avg Stain 1 Cytoplasmic OD	0.0283771		Avg Stain 1 Cytoplasmic OD	0.0291006
		Avg Stain 2 Cytoplasmic OD	0.0330018		Avg Stain 2 Cytoplasmic OD	0.0332431		Avg Stain 2 Cytoplasmic OD	0.0331973		Avg Stain 2 Cytoplasmic OD	0.0333025		Avg Stain 2 Cytoplasmic OD	0.0320608		Avg Stain 2 Cytoplasmic OD	0.0329762		Avg Stain 2 Cytoplasmic OD	0.0333218		Avg Stain 2 Cytoplasmic OD	0.0334542
		Avg Cell Area (µm²)	95.0668		Avg Cell Area (µm²)	92.0844		Avg Cell Area (µm²)	88.0762		Avg Cell Area (µm²)	98.0654		Avg Cell Area (µm²)	91.934		Avg Cell Area (µm²)	96.3549		Avg Cell Area (µm²)	94.8937		Avg Cell Area (µm²)	90.0757
		Avg Cytoplasm Area (µm²)	67.9289		Avg Cytoplasm Area (µm²)	63.7024		Avg Cytoplasm Area (µm²)	62.1731		Avg Cytoplasm Area (µm²)	69.6432		Avg Cytoplasm Area (µm²)	61.3938		Avg Cytoplasm Area (µm²)	66.989		Avg Cytoplasm Area (µm²)	64.7975		Avg Cytoplasm Area (µm²)	63.5759
		Avg Nucleus Area (µm²)	27.1379		Avg Nucleus Area (µm²)	28.382		Avg Nucleus Area (µm²)	25.9031		Avg Nucleus Area (µm²)	28.4222		Avg Nucleus Area (µm²)	30.5402		Avg Nucleus Area (µm²)	29.3659		Avg Nucleus Area (µm²)	30.0961		Avg Nucleus Area (µm²)	26.4998
		Avg Nucleus Perimeter (µm)	10.7471		Avg Nucleus Perimeter (µm)	11.2503		Avg Nucleus Perimeter (µm)	10.2646		Avg Nucleus Perimeter (µm)	11.2474		Avg Nucleus Perimeter (µm)	12.0671		Avg Nucleus Perimeter (µm)	11.6128		Avg Nucleus Perimeter (µm)	11.9215		Avg Nucleus Perimeter (µm)	10.5121
		Avg Nucleus Roundness	0.678793		Avg Nucleus Roundness	0.673356		Avg Nucleus Roundness	0.673879		Avg Nucleus Roundness	0.680477		Avg Nucleus Roundness	0.677958		Avg Nucleus Roundness	0.675169		Avg Nucleus Roundness	0.672856		Avg Nucleus Roundness	0.67668
		Tissue Area (µm²)	916962		Tissue Area (µm²)	1036700		Tissue Area (µm²)	742834		Tissue Area (µm²)	759963		Tissue Area (µm²)	996659		Tissue Area (µm²)	1515370		Tissue Area (µm²)	910118		Tissue Area (µm²)	935722
		Tumor: Total Cells	4700		Tumor: Total Cells	5705		Tumor: Total Cells	4191		Tumor: Total Cells	3751		Tumor: Total Cells	5551		Tumor: Total Cells	7805		Tumor: Total Cells	4961		Tumor: Total Cells	5218
		Tumor: Stain 1 Positive Cells	18		Tumor: Stain 1 Positive Cells	11		Tumor: Stain 1 Positive Cells	29		Tumor: Stain 1 Positive Cells	14		Tumor: Stain 1 Positive Cells	23		Tumor: Stain 1 Positive Cells	10		Tumor: Stain 1 Positive Cells	8		Tumor: Stain 1 Positive Cells	38
		Tumor: Stain 1 0+ Cells	4682		Tumor: Stain 1 0+ Cells	5694		Tumor: Stain 1 0+ Cells	4162		Tumor: Stain 1 0+ Cells	3737		Tumor: Stain 1 0+ Cells	5528		Tumor: Stain 1 0+ Cells	7795		Tumor: Stain 1 0+ Cells	4953		Tumor: Stain 1 0+ Cells	5180
		Tumor: Stain 1 1+ Cells	10		Tumor: Stain 1 1+ Cells	5		Tumor: Stain 1 1+ Cells	14		Tumor: Stain 1 1+ Cells	12		Tumor: Stain 1 1+ Cells	11		Tumor: Stain 1 1+ Cells	5		Tumor: Stain 1 1+ Cells	5		Tumor: Stain 1 1+ Cells	18
		Tumor: Stain 1 2+ Cells	4		Tumor: Stain 1 2+ Cells	4		Tumor: Stain 1 2+ Cells	10		Tumor: Stain 1 2+ Cells	2		Tumor: Stain 1 2+ Cells	7		Tumor: Stain 1 2+ Cells	3		Tumor: Stain 1 2+ Cells	2		Tumor: Stain 1 2+ Cells	17
		Tumor: Stain 1 3+ Cells	4		Tumor: Stain 1 3+ Cells	2		Tumor: Stain 1 3+ Cells	5		Tumor: Stain 1 3+ Cells	0		Tumor: Stain 1 3+ Cells	5		Tumor: Stain 1 3+ Cells	2		Tumor: Stain 1 3+ Cells	1		Tumor: Stain 1 3+ Cells	3
		Tumor: Stain 2 Positive Cells	0		Tumor: Stain 2 Positive Cells	0		Tumor: Stain 2 Positive Cells	0		Tumor: Stain 2 Positive Cells	0		Tumor: Stain 2 Positive Cells	0		Tumor: Stain 2 Positive Cells	0		Tumor: Stain 2 Positive Cells	0		Tumor: Stain 2 Positive Cells	0
		Tumor: Stain 2 0+ Cells	4700		Tumor: Stain 2 0+ Cells	5705		Tumor: Stain 2 0+ Cells	4191		Tumor: Stain 2 0+ Cells	3751		Tumor: Stain 2 0+ Cells	5551		Tumor: Stain 2 0+ Cells	7805		Tumor: Stain 2 0+ Cells	4961		Tumor: Stain 2 0+ Cells	5218
		Tumor: Stain 2 1+ Cells	0		Tumor: Stain 2 1+ Cells	0		Tumor: Stain 2 1+ Cells	0		Tumor: Stain 2 1+ Cells	0		Tumor: Stain 2 1+ Cells	0		Tumor: Stain 2 1+ Cells	0		Tumor: Stain 2 1+ Cells	0		Tumor: Stain 2 1+ Cells	0
		Tumor: Stain 2 2+ Cells	0		Tumor: Stain 2 2+ Cells	0		Tumor: Stain 2 2+ Cells	0		Tumor: Stain 2 2+ Cells	0		Tumor: Stain 2 2+ Cells	0		Tumor: Stain 2 2+ Cells	0		Tumor: Stain 2 2+ Cells	0		Tumor: Stain 2 2+ Cells	0
		Tumor: Stain 2 3+ Cells	0		Tumor: Stain 2 3+ Cells	0		Tumor: Stain 2 3+ Cells	0		Tumor: Stain 2 3+ Cells	0		Tumor: Stain 2 3+ Cells	0		Tumor: Stain 2 3+ Cells	0		Tumor: Stain 2 3+ Cells	0		Tumor: Stain 2 3+ Cells	0
		Tumor: Dual Positive Cells	0		Tumor: Dual Positive Cells	0		Tumor: Dual Positive Cells	0		Tumor: Dual Positive Cells	0		Tumor: Dual Positive Cells	0		Tumor: Dual Positive Cells	0		Tumor: Dual Positive Cells	0		Tumor: Dual Positive Cells	0
		Tumor: Dual Negative Cells	4682		Tumor: Dual Negative Cells	5694		Tumor: Dual Negative Cells	4162		Tumor: Dual Negative Cells	3737		Tumor: Dual Negative Cells	5528		Tumor: Dual Negative Cells	7795		Tumor: Dual Negative Cells	4953		Tumor: Dual Negative Cells	5180
		Tumor: % Stain 1 Positive Cells	0.382979		Tumor: % Stain 1 Positive Cells	0.192813		Tumor: % Stain 1 Positive Cells	0.691959		Tumor: % Stain 1 Positive Cells	0.373234		Tumor: % Stain 1 Positive Cells	0.41434		Tumor: % Stain 1 Positive Cells	0.128123		Tumor: % Stain 1 Positive Cells	0.161258		Tumor: % Stain 1 Positive Cells	0.728248		0.384119
		Tumor: % Stain 1 0+ Cells	99.617		Tumor: % Stain 1 0+ Cells	99.8072		Tumor: % Stain 1 0+ Cells	99.308		Tumor: % Stain 1 0+ Cells	99.6268		Tumor: % Stain 1 0+ Cells	99.5857		Tumor: % Stain 1 0+ Cells	99.8719		Tumor: % Stain 1 0+ Cells	99.8387		Tumor: % Stain 1 0+ Cells	99.2718
		Tumor: % Stain 1 1+ Cells	0.212766		Tumor: % Stain 1 1+ Cells	0.0876424		Tumor: % Stain 1 1+ Cells	0.334049		Tumor: % Stain 1 1+ Cells	0.319915		Tumor: % Stain 1 1+ Cells	0.198162		Tumor: % Stain 1 1+ Cells	0.0640615		Tumor: % Stain 1 1+ Cells	0.100786		Tumor: % Stain 1 1+ Cells	0.34496
		Tumor: % Stain 1 2+ Cells	0.0851064		Tumor: % Stain 1 2+ Cells	0.0701139		Tumor: % Stain 1 2+ Cells	0.238607		Tumor: % Stain 1 2+ Cells	0.0533191		Tumor: % Stain 1 2+ Cells	0.126103		Tumor: % Stain 1 2+ Cells	0.0384369		Tumor: % Stain 1 2+ Cells	0.0403145		Tumor: % Stain 1 2+ Cells	0.325795
		Tumor: % Stain 1 3+ Cells	0.0851064		Tumor: % Stain 1 3+ Cells	0.035057		Tumor: % Stain 1 3+ Cells	0.119303		Tumor: % Stain 1 3+ Cells	0		Tumor: % Stain 1 3+ Cells	0.0900739		Tumor: % Stain 1 3+ Cells	0.0256246		Tumor: % Stain 1 3+ Cells	0.0201572		Tumor: % Stain 1 3+ Cells	0.0574933
		Tumor: Stain 1 H-Score	0.638298		Tumor: Stain 1 H-Score	0.333041		Tumor: Stain 1 H-Score	1.16917		Tumor: Stain 1 H-Score	0.426553		Tumor: Stain 1 H-Score	0.720591		Tumor: Stain 1 H-Score	0.217809		Tumor: Stain 1 H-Score	0.241887		Tumor: Stain 1 H-Score	1.16903
		Tumor: % Stain 2 Positive Cells	0		Tumor: % Stain 2 Positive Cells	0		Tumor: % Stain 2 Positive Cells	0		Tumor: % Stain 2 Positive Cells	0		Tumor: % Stain 2 Positive Cells	0		Tumor: % Stain 2 Positive Cells	0		Tumor: % Stain 2 Positive Cells	0		Tumor: % Stain 2 Positive Cells	0
		Tumor: % Stain 2 0+ Cells	100		Tumor: % Stain 2 0+ Cells	100		Tumor: % Stain 2 0+ Cells	100		Tumor: % Stain 2 0+ Cells	100		Tumor: % Stain 2 0+ Cells	100		Tumor: % Stain 2 0+ Cells	100		Tumor: % Stain 2 0+ Cells	100		Tumor: % Stain 2 0+ Cells	100
		Tumor: % Stain 2 1+ Cells	0		Tumor: % Stain 2 1+ Cells	0		Tumor: % Stain 2 1+ Cells	0		Tumor: % Stain 2 1+ Cells	0		Tumor: % Stain 2 1+ Cells	0		Tumor: % Stain 2 1+ Cells	0		Tumor: % Stain 2 1+ Cells	0		Tumor: % Stain 2 1+ Cells	0
		Tumor: % Stain 2 2+ Cells	0		Tumor: % Stain 2 2+ Cells	0		Tumor: % Stain 2 2+ Cells	0		Tumor: % Stain 2 2+ Cells	0		Tumor: % Stain 2 2+ Cells	0		Tumor: % Stain 2 2+ Cells	0		Tumor: % Stain 2 2+ Cells	0		Tumor: % Stain 2 2+ Cells	0
		Tumor: % Stain 2 3+ Cells	0		Tumor: % Stain 2 3+ Cells	0		Tumor: % Stain 2 3+ Cells	0		Tumor: % Stain 2 3+ Cells	0		Tumor: % Stain 2 3+ Cells	0		Tumor: % Stain 2 3+ Cells	0		Tumor: % Stain 2 3+ Cells	0		Tumor: % Stain 2 3+ Cells	0
		Tumor: Stain 2 H-Score	0		Tumor: Stain 2 H-Score	0		Tumor: Stain 2 H-Score	0		Tumor: Stain 2 H-Score	0		Tumor: Stain 2 H-Score	0		Tumor: Stain 2 H-Score	0		Tumor: Stain 2 H-Score	0		Tumor: Stain 2 H-Score	0
		Tumor: % Dual Positive Cells	0		Tumor: % Dual Positive Cells	0		Tumor: % Dual Positive Cells	0		Tumor: % Dual Positive Cells	0		Tumor: % Dual Positive Cells	0		Tumor: % Dual Positive Cells	0		Tumor: % Dual Positive Cells	0		Tumor: % Dual Positive Cells	0
		Tumor: % Dual Negative Cells	99.617		Tumor: % Dual Negative Cells	99.8072		Tumor: % Dual Negative Cells	99.308		Tumor: % Dual Negative Cells	99.6268		Tumor: % Dual Negative Cells	99.5857		Tumor: % Dual Negative Cells	99.8719		Tumor: % Dual Negative Cells	99.8387		Tumor: % Dual Negative Cells	99.2718
		Tumor: Avg Stain 1 Nuclear OD	0.0298857		Tumor: Avg Stain 1 Nuclear OD	0.0282927		Tumor: Avg Stain 1 Nuclear OD	0.0314872		Tumor: Avg Stain 1 Nuclear OD	0.0290382		Tumor: Avg Stain 1 Nuclear OD	0.0314782		Tumor: Avg Stain 1 Nuclear OD	0.0282007		Tumor: Avg Stain 1 Nuclear OD	0.0279245		Tumor: Avg Stain 1 Nuclear OD	0.0316341
		Tumor: Avg Stain 2 Nuclear OD	0.0376762		Tumor: Avg Stain 2 Nuclear OD	0.0383009		Tumor: Avg Stain 2 Nuclear OD	0.0387002		Tumor: Avg Stain 2 Nuclear OD	0.0375578		Tumor: Avg Stain 2 Nuclear OD	0.0345188		Tumor: Avg Stain 2 Nuclear OD	0.0365316		Tumor: Avg Stain 2 Nuclear OD	0.0379293		Tumor: Avg Stain 2 Nuclear OD	0.0380505
		Tumor: Avg Stain 1 Cytoplasmic OD	0.0287609		Tumor: Avg Stain 1 Cytoplasmic OD	0.0283749		Tumor: Avg Stain 1 Cytoplasmic OD	0.0289588		Tumor: Avg Stain 1 Cytoplasmic OD	0.0284997		Tumor: Avg Stain 1 Cytoplasmic OD	0.0298955		Tumor: Avg Stain 1 Cytoplasmic OD	0.0283762		Tumor: Avg Stain 1 Cytoplasmic OD	0.0283771		Tumor: Avg Stain 1 Cytoplasmic OD	0.0291006
		Tumor: Avg Stain 2 Cytoplasmic OD	0.0330018		Tumor: Avg Stain 2 Cytoplasmic OD	0.0332431		Tumor: Avg Stain 2 Cytoplasmic OD	0.0331973		Tumor: Avg Stain 2 Cytoplasmic OD	0.0333025		Tumor: Avg Stain 2 Cytoplasmic OD	0.0320608		Tumor: Avg Stain 2 Cytoplasmic OD	0.0329762		Tumor: Avg Stain 2 Cytoplasmic OD	0.0333218		Tumor: Avg Stain 2 Cytoplasmic OD	0.0334542
		Tumor: Avg Cell Area (µm²)	95.0668		Tumor: Avg Cell Area (µm²)	92.0844		Tumor: Avg Cell Area (µm²)	88.0762		Tumor: Avg Cell Area (µm²)	98.0654		Tumor: Avg Cell Area (µm²)	91.934		Tumor: Avg Cell Area (µm²)	96.3549		Tumor: Avg Cell Area (µm²)	94.8937		Tumor: Avg Cell Area (µm²)	90.0757
		Tumor: Avg Cytoplasm Area (µm²)	67.9289		Tumor: Avg Cytoplasm Area (µm²)	63.7024		Tumor: Avg Cytoplasm Area (µm²)	62.1731		Tumor: Avg Cytoplasm Area (µm²)	69.6432		Tumor: Avg Cytoplasm Area (µm²)	61.3938		Tumor: Avg Cytoplasm Area (µm²)	66.989		Tumor: Avg Cytoplasm Area (µm²)	64.7975		Tumor: Avg Cytoplasm Area (µm²)	63.5759
		Tumor: Avg Nucleus Area (µm²)	27.1379		Tumor: Avg Nucleus Area (µm²)	28.382		Tumor: Avg Nucleus Area (µm²)	25.9031		Tumor: Avg Nucleus Area (µm²)	28.4222		Tumor: Avg Nucleus Area (µm²)	30.5402		Tumor: Avg Nucleus Area (µm²)	29.3659		Tumor: Avg Nucleus Area (µm²)	30.0961		Tumor: Avg Nucleus Area (µm²)	26.4998
		Tumor: Avg Nucleus Perimeter (µm)	10.7471		Tumor: Avg Nucleus Perimeter (µm)	11.2503		Tumor: Avg Nucleus Perimeter (µm)	10.2646		Tumor: Avg Nucleus Perimeter (µm)	11.2474		Tumor: Avg Nucleus Perimeter (µm)	12.0671		Tumor: Avg Nucleus Perimeter (µm)	11.6128		Tumor: Avg Nucleus Perimeter (µm)	11.9215		Tumor: Avg Nucleus Perimeter (µm)	10.5121
		Tumor: Avg Nucleus Roundness	0.678793		Tumor: Avg Nucleus Roundness	0.673356		Tumor: Avg Nucleus Roundness	0.673879		Tumor: Avg Nucleus Roundness	0.680477		Tumor: Avg Nucleus Roundness	0.677958		Tumor: Avg Nucleus Roundness	0.675169		Tumor: Avg Nucleus Roundness	0.672856		Tumor: Avg Nucleus Roundness	0.67668
		Tumor: Tissue Area (µm²)	916962		Tumor: Tissue Area (µm²)	1036700		Tumor: Tissue Area (µm²)	742834		Tumor: Tissue Area (µm²)	759963		Tumor: Tissue Area (µm²)	996659		Tumor: Tissue Area (µm²)	1515370		Tumor: Tissue Area (µm²)	910118		Tumor: Tissue Area (µm²)	935722
		BSNA7.2g	WT
		Name	Value		Name	Value		Name	Value		Name	Value		Name	Value		Name	Value		Name	Value		Name	Value
		Classified Area (mm²)	0.53878		Classified Area (mm²)	0.56695		Classified Area (mm²)	0.64888		Classified Area (mm²)	0.52546		Classified Area (mm²)	0.50422		Classified Area (mm²)	0.62018		Classified Area (mm²)	0.43633		Classified Area (mm²)	0.73901
		Tumor Area (mm²)	0.52749		Tumor Area (mm²)	0.54288		Tumor Area (mm²)	0.64248		Tumor Area (mm²)	0.15148		Tumor Area (mm²)	0.23301		Tumor Area (mm²)	0.59262		Tumor Area (mm²)	0.38902		Tumor Area (mm²)	0.64054
		Necrosis Area (mm²)	0		Necrosis Area (mm²)	0		Necrosis Area (mm²)	0		Necrosis Area (mm²)	0		Necrosis Area (mm²)	0		Necrosis Area (mm²)	8e-05		Necrosis Area (mm²)	0		Necrosis Area (mm²)	0.00064
		Empty Area (mm²)	0		Empty Area (mm²)	0		Empty Area (mm²)	0.00057		Empty Area (mm²)	0		Empty Area (mm²)	0		Empty Area (mm²)	0		Empty Area (mm²)	0.00525		Empty Area (mm²)	0.00249
		Normal Area (mm²)	0.0113		Normal Area (mm²)	0.02407		Normal Area (mm²)	0.00583		Normal Area (mm²)	0.37398		Normal Area (mm²)	0.27121		Normal Area (mm²)	0.02748		Normal Area (mm²)	0.04206		Normal Area (mm²)	0.09534
		Total Cells	2917		Total Cells	2777		Total Cells	2719		Total Cells	1000		Total Cells	1504		Total Cells	2775		Total Cells	2303		Total Cells	3598
		Stain 1 Positive Cells	26		Stain 1 Positive Cells	57		Stain 1 Positive Cells	52		Stain 1 Positive Cells	60		Stain 1 Positive Cells	66		Stain 1 Positive Cells	77		Stain 1 Positive Cells	46		Stain 1 Positive Cells	15
		Stain 1 0+ Cells	2891		Stain 1 0+ Cells	2720		Stain 1 0+ Cells	2667		Stain 1 0+ Cells	940		Stain 1 0+ Cells	1438		Stain 1 0+ Cells	2698		Stain 1 0+ Cells	2257		Stain 1 0+ Cells	3583
		Stain 1 1+ Cells	12		Stain 1 1+ Cells	31		Stain 1 1+ Cells	30		Stain 1 1+ Cells	33		Stain 1 1+ Cells	28		Stain 1 1+ Cells	45		Stain 1 1+ Cells	26		Stain 1 1+ Cells	9
		Stain 1 2+ Cells	10		Stain 1 2+ Cells	17		Stain 1 2+ Cells	14		Stain 1 2+ Cells	12		Stain 1 2+ Cells	19		Stain 1 2+ Cells	15		Stain 1 2+ Cells	12		Stain 1 2+ Cells	4
		Stain 1 3+ Cells	4		Stain 1 3+ Cells	9		Stain 1 3+ Cells	8		Stain 1 3+ Cells	15		Stain 1 3+ Cells	19		Stain 1 3+ Cells	17		Stain 1 3+ Cells	8		Stain 1 3+ Cells	2
		Stain 2 Positive Cells	0		Stain 2 Positive Cells	0		Stain 2 Positive Cells	0		Stain 2 Positive Cells	0		Stain 2 Positive Cells	0		Stain 2 Positive Cells	0		Stain 2 Positive Cells	0		Stain 2 Positive Cells	0
		Stain 2 0+ Cells	2917		Stain 2 0+ Cells	2777		Stain 2 0+ Cells	2719		Stain 2 0+ Cells	1000		Stain 2 0+ Cells	1504		Stain 2 0+ Cells	2775		Stain 2 0+ Cells	2303		Stain 2 0+ Cells	3598
		Stain 2 1+ Cells	0		Stain 2 1+ Cells	0		Stain 2 1+ Cells	0		Stain 2 1+ Cells	0		Stain 2 1+ Cells	0		Stain 2 1+ Cells	0		Stain 2 1+ Cells	0		Stain 2 1+ Cells	0
		Stain 2 2+ Cells	0		Stain 2 2+ Cells	0		Stain 2 2+ Cells	0		Stain 2 2+ Cells	0		Stain 2 2+ Cells	0		Stain 2 2+ Cells	0		Stain 2 2+ Cells	0		Stain 2 2+ Cells	0
		Stain 2 3+ Cells	0		Stain 2 3+ Cells	0		Stain 2 3+ Cells	0		Stain 2 3+ Cells	0		Stain 2 3+ Cells	0		Stain 2 3+ Cells	0		Stain 2 3+ Cells	0		Stain 2 3+ Cells	0
		Dual Positive Cells	0		Dual Positive Cells	0		Dual Positive Cells	0		Dual Positive Cells	0		Dual Positive Cells	0		Dual Positive Cells	0		Dual Positive Cells	0		Dual Positive Cells	0
		Dual Negative Cells	2891		Dual Negative Cells	2720		Dual Negative Cells	2667		Dual Negative Cells	940		Dual Negative Cells	1438		Dual Negative Cells	2698		Dual Negative Cells	2257		Dual Negative Cells	3583
		% Stain 1 Positive Cells	0.891327		% Stain 1 Positive Cells	2.05257		% Stain 1 Positive Cells	1.91247		% Stain 1 Positive Cells	6		% Stain 1 Positive Cells	4.3883		% Stain 1 Positive Cells	2.77477		% Stain 1 Positive Cells	1.99739		% Stain 1 Positive Cells	0.416898
		% Stain 1 0+ Cells	99.1087		% Stain 1 0+ Cells	97.9474		% Stain 1 0+ Cells	98.0875		% Stain 1 0+ Cells	94		% Stain 1 0+ Cells	95.6117		% Stain 1 0+ Cells	97.2252		% Stain 1 0+ Cells	98.0026		% Stain 1 0+ Cells	99.5831
		% Stain 1 1+ Cells	0.411382		% Stain 1 1+ Cells	1.11631		% Stain 1 1+ Cells	1.10335		% Stain 1 1+ Cells	3.3		% Stain 1 1+ Cells	1.8617		% Stain 1 1+ Cells	1.62162		% Stain 1 1+ Cells	1.12896		% Stain 1 1+ Cells	0.250139
		% Stain 1 2+ Cells	0.342818		% Stain 1 2+ Cells	0.612171		% Stain 1 2+ Cells	0.514895		% Stain 1 2+ Cells	1.2		% Stain 1 2+ Cells	1.2633		% Stain 1 2+ Cells	0.540541		% Stain 1 2+ Cells	0.521059		% Stain 1 2+ Cells	0.111173
		% Stain 1 3+ Cells	0.137127		% Stain 1 3+ Cells	0.324091		% Stain 1 3+ Cells	0.294226		% Stain 1 3+ Cells	1.5		% Stain 1 3+ Cells	1.2633		% Stain 1 3+ Cells	0.612613		% Stain 1 3+ Cells	0.347373		% Stain 1 3+ Cells	0.0555864
		Stain 1 H-Score	1.5084		Stain 1 H-Score	3.31293		Stain 1 H-Score	3.01581		Stain 1 H-Score	10.2		Stain 1 H-Score	8.17819		Stain 1 H-Score	4.54054		Stain 1 H-Score	3.2132		Stain 1 H-Score	0.639244
		% Stain 2 Positive Cells	0		% Stain 2 Positive Cells	0		% Stain 2 Positive Cells	0		% Stain 2 Positive Cells	0		% Stain 2 Positive Cells	0		% Stain 2 Positive Cells	0		% Stain 2 Positive Cells	0		% Stain 2 Positive Cells	0
		% Stain 2 0+ Cells	100		% Stain 2 0+ Cells	100		% Stain 2 0+ Cells	100		% Stain 2 0+ Cells	100		% Stain 2 0+ Cells	100		% Stain 2 0+ Cells	100		% Stain 2 0+ Cells	100		% Stain 2 0+ Cells	100
		% Stain 2 1+ Cells	0		% Stain 2 1+ Cells	0		% Stain 2 1+ Cells	0		% Stain 2 1+ Cells	0		% Stain 2 1+ Cells	0		% Stain 2 1+ Cells	0		% Stain 2 1+ Cells	0		% Stain 2 1+ Cells	0
		% Stain 2 2+ Cells	0		% Stain 2 2+ Cells	0		% Stain 2 2+ Cells	0		% Stain 2 2+ Cells	0		% Stain 2 2+ Cells	0		% Stain 2 2+ Cells	0		% Stain 2 2+ Cells	0		% Stain 2 2+ Cells	0
		% Stain 2 3+ Cells	0		% Stain 2 3+ Cells	0		% Stain 2 3+ Cells	0		% Stain 2 3+ Cells	0		% Stain 2 3+ Cells	0		% Stain 2 3+ Cells	0		% Stain 2 3+ Cells	0		% Stain 2 3+ Cells	0
		Stain 2 H-Score	0		Stain 2 H-Score	0		Stain 2 H-Score	0		Stain 2 H-Score	0		Stain 2 H-Score	0		Stain 2 H-Score	0		Stain 2 H-Score	0		Stain 2 H-Score	0
		% Dual Positive Cells	0		% Dual Positive Cells	0		% Dual Positive Cells	0		% Dual Positive Cells	0		% Dual Positive Cells	0		% Dual Positive Cells	0		% Dual Positive Cells	0		% Dual Positive Cells	0
		% Dual Negative Cells	99.1087		% Dual Negative Cells	97.9474		% Dual Negative Cells	98.0875		% Dual Negative Cells	94		% Dual Negative Cells	95.6117		% Dual Negative Cells	97.2252		% Dual Negative Cells	98.0026		% Dual Negative Cells	99.5831
		Avg Stain 1 Nuclear OD	0.0326692		Avg Stain 1 Nuclear OD	0.0398737		Avg Stain 1 Nuclear OD	0.0386216		Avg Stain 1 Nuclear OD	0.0624855		Avg Stain 1 Nuclear OD	0.0550405		Avg Stain 1 Nuclear OD	0.0457046		Avg Stain 1 Nuclear OD	0.0383399		Avg Stain 1 Nuclear OD	0.0301337
		Avg Stain 2 Nuclear OD	0.0359517		Avg Stain 2 Nuclear OD	0.0368934		Avg Stain 2 Nuclear OD	0.0369679		Avg Stain 2 Nuclear OD	0.0373619		Avg Stain 2 Nuclear OD	0.0370667		Avg Stain 2 Nuclear OD	0.036793		Avg Stain 2 Nuclear OD	0.037574		Avg Stain 2 Nuclear OD	0.0370168
		Avg Stain 1 Cytoplasmic OD	0.0294611		Avg Stain 1 Cytoplasmic OD	0.0310428		Avg Stain 1 Cytoplasmic OD	0.0306079		Avg Stain 1 Cytoplasmic OD	0.0368796		Avg Stain 1 Cytoplasmic OD	0.0354755		Avg Stain 1 Cytoplasmic OD	0.0333935		Avg Stain 1 Cytoplasmic OD	0.0312489		Avg Stain 1 Cytoplasmic OD	0.0296402
		Avg Stain 2 Cytoplasmic OD	0.0322632		Avg Stain 2 Cytoplasmic OD	0.0322805		Avg Stain 2 Cytoplasmic OD	0.0322019		Avg Stain 2 Cytoplasmic OD	0.0318963		Avg Stain 2 Cytoplasmic OD	0.0320749		Avg Stain 2 Cytoplasmic OD	0.0319265		Avg Stain 2 Cytoplasmic OD	0.0320324		Avg Stain 2 Cytoplasmic OD	0.0319683
		Avg Cell Area (µm²)	92.2047		Avg Cell Area (µm²)	98.3815		Avg Cell Area (µm²)	107.159		Avg Cell Area (µm²)	89.426		Avg Cell Area (µm²)	88.7046		Avg Cell Area (µm²)	105.705		Avg Cell Area (µm²)	81.4864		Avg Cell Area (µm²)	84.8315
		Avg Cytoplasm Area (µm²)	62.4564		Avg Cytoplasm Area (µm²)	67.2291		Avg Cytoplasm Area (µm²)	75.5491		Avg Cytoplasm Area (µm²)	59.9505		Avg Cytoplasm Area (µm²)	59.0971		Avg Cytoplasm Area (µm²)	72.1007		Avg Cytoplasm Area (µm²)	52.1591		Avg Cytoplasm Area (µm²)	55.3695
		Avg Nucleus Area (µm²)	29.7483		Avg Nucleus Area (µm²)	31.1524		Avg Nucleus Area (µm²)	31.6098		Avg Nucleus Area (µm²)	29.4755		Avg Nucleus Area (µm²)	29.6074		Avg Nucleus Area (µm²)	33.6046		Avg Nucleus Area (µm²)	29.3273		Avg Nucleus Area (µm²)	29.462
		Avg Nucleus Perimeter (µm)	11.8025		Avg Nucleus Perimeter (µm)	12.3078		Avg Nucleus Perimeter (µm)	12.4844		Avg Nucleus Perimeter (µm)	11.6495		Avg Nucleus Perimeter (µm)	11.7305		Avg Nucleus Perimeter (µm)	13.233		Avg Nucleus Perimeter (µm)	11.6413		Avg Nucleus Perimeter (µm)	11.6873
		Avg Nucleus Roundness	0.676128		Avg Nucleus Roundness	0.67788		Avg Nucleus Roundness	0.688551		Avg Nucleus Roundness	0.679565		Avg Nucleus Roundness	0.676504		Avg Nucleus Roundness	0.683744		Avg Nucleus Roundness	0.664733		Avg Nucleus Roundness	0.665689
		Tissue Area (µm²)	524753		Tissue Area (µm²)	547676		Tissue Area (µm²)	612788		Tissue Area (µm²)	169858		Tissue Area (µm²)	261845		Tissue Area (µm²)	593363		Tissue Area (µm²)	350253		Tissue Area (µm²)	594609
		Tumor: Total Cells	2917		Tumor: Total Cells	2777		Tumor: Total Cells	2719		Tumor: Total Cells	1000		Tumor: Total Cells	1504		Tumor: Total Cells	2775		Tumor: Total Cells	2303		Tumor: Total Cells	3598
		Tumor: Stain 1 Positive Cells	26		Tumor: Stain 1 Positive Cells	57		Tumor: Stain 1 Positive Cells	52		Tumor: Stain 1 Positive Cells	60		Tumor: Stain 1 Positive Cells	66		Tumor: Stain 1 Positive Cells	77		Tumor: Stain 1 Positive Cells	46		Tumor: Stain 1 Positive Cells	15
		Tumor: Stain 1 0+ Cells	2891		Tumor: Stain 1 0+ Cells	2720		Tumor: Stain 1 0+ Cells	2667		Tumor: Stain 1 0+ Cells	940		Tumor: Stain 1 0+ Cells	1438		Tumor: Stain 1 0+ Cells	2698		Tumor: Stain 1 0+ Cells	2257		Tumor: Stain 1 0+ Cells	3583
		Tumor: Stain 1 1+ Cells	12		Tumor: Stain 1 1+ Cells	31		Tumor: Stain 1 1+ Cells	30		Tumor: Stain 1 1+ Cells	33		Tumor: Stain 1 1+ Cells	28		Tumor: Stain 1 1+ Cells	45		Tumor: Stain 1 1+ Cells	26		Tumor: Stain 1 1+ Cells	9
		Tumor: Stain 1 2+ Cells	10		Tumor: Stain 1 2+ Cells	17		Tumor: Stain 1 2+ Cells	14		Tumor: Stain 1 2+ Cells	12		Tumor: Stain 1 2+ Cells	19		Tumor: Stain 1 2+ Cells	15		Tumor: Stain 1 2+ Cells	12		Tumor: Stain 1 2+ Cells	4
		Tumor: Stain 1 3+ Cells	4		Tumor: Stain 1 3+ Cells	9		Tumor: Stain 1 3+ Cells	8		Tumor: Stain 1 3+ Cells	15		Tumor: Stain 1 3+ Cells	19		Tumor: Stain 1 3+ Cells	17		Tumor: Stain 1 3+ Cells	8		Tumor: Stain 1 3+ Cells	2
		Tumor: Stain 2 Positive Cells	0		Tumor: Stain 2 Positive Cells	0		Tumor: Stain 2 Positive Cells	0		Tumor: Stain 2 Positive Cells	0		Tumor: Stain 2 Positive Cells	0		Tumor: Stain 2 Positive Cells	0		Tumor: Stain 2 Positive Cells	0		Tumor: Stain 2 Positive Cells	0
		Tumor: Stain 2 0+ Cells	2917		Tumor: Stain 2 0+ Cells	2777		Tumor: Stain 2 0+ Cells	2719		Tumor: Stain 2 0+ Cells	1000		Tumor: Stain 2 0+ Cells	1504		Tumor: Stain 2 0+ Cells	2775		Tumor: Stain 2 0+ Cells	2303		Tumor: Stain 2 0+ Cells	3598
		Tumor: Stain 2 1+ Cells	0		Tumor: Stain 2 1+ Cells	0		Tumor: Stain 2 1+ Cells	0		Tumor: Stain 2 1+ Cells	0		Tumor: Stain 2 1+ Cells	0		Tumor: Stain 2 1+ Cells	0		Tumor: Stain 2 1+ Cells	0		Tumor: Stain 2 1+ Cells	0
		Tumor: Stain 2 2+ Cells	0		Tumor: Stain 2 2+ Cells	0		Tumor: Stain 2 2+ Cells	0		Tumor: Stain 2 2+ Cells	0		Tumor: Stain 2 2+ Cells	0		Tumor: Stain 2 2+ Cells	0		Tumor: Stain 2 2+ Cells	0		Tumor: Stain 2 2+ Cells	0
		Tumor: Stain 2 3+ Cells	0		Tumor: Stain 2 3+ Cells	0		Tumor: Stain 2 3+ Cells	0		Tumor: Stain 2 3+ Cells	0		Tumor: Stain 2 3+ Cells	0		Tumor: Stain 2 3+ Cells	0		Tumor: Stain 2 3+ Cells	0		Tumor: Stain 2 3+ Cells	0
		Tumor: Dual Positive Cells	0		Tumor: Dual Positive Cells	0		Tumor: Dual Positive Cells	0		Tumor: Dual Positive Cells	0		Tumor: Dual Positive Cells	0		Tumor: Dual Positive Cells	0		Tumor: Dual Positive Cells	0		Tumor: Dual Positive Cells	0
		Tumor: Dual Negative Cells	2891		Tumor: Dual Negative Cells	2720		Tumor: Dual Negative Cells	2667		Tumor: Dual Negative Cells	940		Tumor: Dual Negative Cells	1438		Tumor: Dual Negative Cells	2698		Tumor: Dual Negative Cells	2257		Tumor: Dual Negative Cells	3583
		Tumor: % Stain 1 Positive Cells	0.891327		Tumor: % Stain 1 Positive Cells	2.05257		Tumor: % Stain 1 Positive Cells	1.91247		Tumor: % Stain 1 Positive Cells	6		Tumor: % Stain 1 Positive Cells	4.3883		Tumor: % Stain 1 Positive Cells	2.77477		Tumor: % Stain 1 Positive Cells	1.99739		Tumor: % Stain 1 Positive Cells	0.416898		2.55422
		Tumor: % Stain 1 0+ Cells	99.1087		Tumor: % Stain 1 0+ Cells	97.9474		Tumor: % Stain 1 0+ Cells	98.0875		Tumor: % Stain 1 0+ Cells	94		Tumor: % Stain 1 0+ Cells	95.6117		Tumor: % Stain 1 0+ Cells	97.2252		Tumor: % Stain 1 0+ Cells	98.0026		Tumor: % Stain 1 0+ Cells	99.5831
		Tumor: % Stain 1 1+ Cells	0.411382		Tumor: % Stain 1 1+ Cells	1.11631		Tumor: % Stain 1 1+ Cells	1.10335		Tumor: % Stain 1 1+ Cells	3.3		Tumor: % Stain 1 1+ Cells	1.8617		Tumor: % Stain 1 1+ Cells	1.62162		Tumor: % Stain 1 1+ Cells	1.12896		Tumor: % Stain 1 1+ Cells	0.250139
		Tumor: % Stain 1 2+ Cells	0.342818		Tumor: % Stain 1 2+ Cells	0.612171		Tumor: % Stain 1 2+ Cells	0.514895		Tumor: % Stain 1 2+ Cells	1.2		Tumor: % Stain 1 2+ Cells	1.2633		Tumor: % Stain 1 2+ Cells	0.540541		Tumor: % Stain 1 2+ Cells	0.521059		Tumor: % Stain 1 2+ Cells	0.111173
		Tumor: % Stain 1 3+ Cells	0.137127		Tumor: % Stain 1 3+ Cells	0.324091		Tumor: % Stain 1 3+ Cells	0.294226		Tumor: % Stain 1 3+ Cells	1.5		Tumor: % Stain 1 3+ Cells	1.2633		Tumor: % Stain 1 3+ Cells	0.612613		Tumor: % Stain 1 3+ Cells	0.347373		Tumor: % Stain 1 3+ Cells	0.0555864
		Tumor: Stain 1 H-Score	1.5084		Tumor: Stain 1 H-Score	3.31293		Tumor: Stain 1 H-Score	3.01581		Tumor: Stain 1 H-Score	10.2		Tumor: Stain 1 H-Score	8.17819		Tumor: Stain 1 H-Score	4.54054		Tumor: Stain 1 H-Score	3.2132		Tumor: Stain 1 H-Score	0.639244
		Tumor: % Stain 2 Positive Cells	0		Tumor: % Stain 2 Positive Cells	0		Tumor: % Stain 2 Positive Cells	0		Tumor: % Stain 2 Positive Cells	0		Tumor: % Stain 2 Positive Cells	0		Tumor: % Stain 2 Positive Cells	0		Tumor: % Stain 2 Positive Cells	0		Tumor: % Stain 2 Positive Cells	0
		Tumor: % Stain 2 0+ Cells	100		Tumor: % Stain 2 0+ Cells	100		Tumor: % Stain 2 0+ Cells	100		Tumor: % Stain 2 0+ Cells	100		Tumor: % Stain 2 0+ Cells	100		Tumor: % Stain 2 0+ Cells	100		Tumor: % Stain 2 0+ Cells	100		Tumor: % Stain 2 0+ Cells	100
		Tumor: % Stain 2 1+ Cells	0		Tumor: % Stain 2 1+ Cells	0		Tumor: % Stain 2 1+ Cells	0		Tumor: % Stain 2 1+ Cells	0		Tumor: % Stain 2 1+ Cells	0		Tumor: % Stain 2 1+ Cells	0		Tumor: % Stain 2 1+ Cells	0		Tumor: % Stain 2 1+ Cells	0
		Tumor: % Stain 2 2+ Cells	0		Tumor: % Stain 2 2+ Cells	0		Tumor: % Stain 2 2+ Cells	0		Tumor: % Stain 2 2+ Cells	0		Tumor: % Stain 2 2+ Cells	0		Tumor: % Stain 2 2+ Cells	0		Tumor: % Stain 2 2+ Cells	0		Tumor: % Stain 2 2+ Cells	0
		Tumor: % Stain 2 3+ Cells	0		Tumor: % Stain 2 3+ Cells	0		Tumor: % Stain 2 3+ Cells	0		Tumor: % Stain 2 3+ Cells	0		Tumor: % Stain 2 3+ Cells	0		Tumor: % Stain 2 3+ Cells	0		Tumor: % Stain 2 3+ Cells	0		Tumor: % Stain 2 3+ Cells	0
		Tumor: Stain 2 H-Score	0		Tumor: Stain 2 H-Score	0		Tumor: Stain 2 H-Score	0		Tumor: Stain 2 H-Score	0		Tumor: Stain 2 H-Score	0		Tumor: Stain 2 H-Score	0		Tumor: Stain 2 H-Score	0		Tumor: Stain 2 H-Score	0
		Tumor: % Dual Positive Cells	0		Tumor: % Dual Positive Cells	0		Tumor: % Dual Positive Cells	0		Tumor: % Dual Positive Cells	0		Tumor: % Dual Positive Cells	0		Tumor: % Dual Positive Cells	0		Tumor: % Dual Positive Cells	0		Tumor: % Dual Positive Cells	0
		Tumor: % Dual Negative Cells	99.1087		Tumor: % Dual Negative Cells	97.9474		Tumor: % Dual Negative Cells	98.0875		Tumor: % Dual Negative Cells	94		Tumor: % Dual Negative Cells	95.6117		Tumor: % Dual Negative Cells	97.2252		Tumor: % Dual Negative Cells	98.0026		Tumor: % Dual Negative Cells	99.5831
		Tumor: Avg Stain 1 Nuclear OD	0.0326692		Tumor: Avg Stain 1 Nuclear OD	0.0398737		Tumor: Avg Stain 1 Nuclear OD	0.0386216		Tumor: Avg Stain 1 Nuclear OD	0.0624855		Tumor: Avg Stain 1 Nuclear OD	0.0550405		Tumor: Avg Stain 1 Nuclear OD	0.0457046		Tumor: Avg Stain 1 Nuclear OD	0.0383399		Tumor: Avg Stain 1 Nuclear OD	0.0301337
		Tumor: Avg Stain 2 Nuclear OD	0.0359517		Tumor: Avg Stain 2 Nuclear OD	0.0368934		Tumor: Avg Stain 2 Nuclear OD	0.0369679		Tumor: Avg Stain 2 Nuclear OD	0.0373619		Tumor: Avg Stain 2 Nuclear OD	0.0370667		Tumor: Avg Stain 2 Nuclear OD	0.036793		Tumor: Avg Stain 2 Nuclear OD	0.037574		Tumor: Avg Stain 2 Nuclear OD	0.0370168
		Tumor: Avg Stain 1 Cytoplasmic OD	0.0294611		Tumor: Avg Stain 1 Cytoplasmic OD	0.0310428		Tumor: Avg Stain 1 Cytoplasmic OD	0.0306079		Tumor: Avg Stain 1 Cytoplasmic OD	0.0368796		Tumor: Avg Stain 1 Cytoplasmic OD	0.0354755		Tumor: Avg Stain 1 Cytoplasmic OD	0.0333935		Tumor: Avg Stain 1 Cytoplasmic OD	0.0312489		Tumor: Avg Stain 1 Cytoplasmic OD	0.0296402
		Tumor: Avg Stain 2 Cytoplasmic OD	0.0322632		Tumor: Avg Stain 2 Cytoplasmic OD	0.0322805		Tumor: Avg Stain 2 Cytoplasmic OD	0.0322019		Tumor: Avg Stain 2 Cytoplasmic OD	0.0318963		Tumor: Avg Stain 2 Cytoplasmic OD	0.0320749		Tumor: Avg Stain 2 Cytoplasmic OD	0.0319265		Tumor: Avg Stain 2 Cytoplasmic OD	0.0320324		Tumor: Avg Stain 2 Cytoplasmic OD	0.0319683
		Tumor: Avg Cell Area (µm²)	92.2047		Tumor: Avg Cell Area (µm²)	98.3815		Tumor: Avg Cell Area (µm²)	107.159		Tumor: Avg Cell Area (µm²)	89.426		Tumor: Avg Cell Area (µm²)	88.7046		Tumor: Avg Cell Area (µm²)	105.705		Tumor: Avg Cell Area (µm²)	81.4864		Tumor: Avg Cell Area (µm²)	84.8315
		Tumor: Avg Cytoplasm Area (µm²)	62.4564		Tumor: Avg Cytoplasm Area (µm²)	67.2291		Tumor: Avg Cytoplasm Area (µm²)	75.5491		Tumor: Avg Cytoplasm Area (µm²)	59.9505		Tumor: Avg Cytoplasm Area (µm²)	59.0971		Tumor: Avg Cytoplasm Area (µm²)	72.1007		Tumor: Avg Cytoplasm Area (µm²)	52.1591		Tumor: Avg Cytoplasm Area (µm²)	55.3695
		Tumor: Avg Nucleus Area (µm²)	29.7483		Tumor: Avg Nucleus Area (µm²)	31.1524		Tumor: Avg Nucleus Area (µm²)	31.6098		Tumor: Avg Nucleus Area (µm²)	29.4755		Tumor: Avg Nucleus Area (µm²)	29.6074		Tumor: Avg Nucleus Area (µm²)	33.6046		Tumor: Avg Nucleus Area (µm²)	29.3273		Tumor: Avg Nucleus Area (µm²)	29.462
		Tumor: Avg Nucleus Perimeter (µm)	11.8025		Tumor: Avg Nucleus Perimeter (µm)	12.3078		Tumor: Avg Nucleus Perimeter (µm)	12.4844		Tumor: Avg Nucleus Perimeter (µm)	11.6495		Tumor: Avg Nucleus Perimeter (µm)	11.7305		Tumor: Avg Nucleus Perimeter (µm)	13.233		Tumor: Avg Nucleus Perimeter (µm)	11.6413		Tumor: Avg Nucleus Perimeter (µm)	11.6873
		Tumor: Avg Nucleus Roundness	0.676128		Tumor: Avg Nucleus Roundness	0.67788		Tumor: Avg Nucleus Roundness	0.688551		Tumor: Avg Nucleus Roundness	0.679565		Tumor: Avg Nucleus Roundness	0.676504		Tumor: Avg Nucleus Roundness	0.683744		Tumor: Avg Nucleus Roundness	0.664733		Tumor: Avg Nucleus Roundness	0.665689
		Tumor: Tissue Area (µm²)	524753		Tumor: Tissue Area (µm²)	547676		Tumor: Tissue Area (µm²)	612788		Tumor: Tissue Area (µm²)	169858		Tumor: Tissue Area (µm²)	261845		Tumor: Tissue Area (µm²)	593363		Tumor: Tissue Area (µm²)	350253		Tumor: Tissue Area (µm²)	594609
		BSNA1.2a	WT
		Name	Value		Name	Value		Name	Value		Name	Value		Name	Value		Name	Value		Name	Value		Name	Value
		Classified Area (mm²)	0.6024		Classified Area (mm²)	0.46538		Classified Area (mm²)	0.47975		Classified Area (mm²)	0.62546		Classified Area (mm²)	0.93175		Classified Area (mm²)	0.63404		Classified Area (mm²)	0.99063		Classified Area (mm²)	0.45584
		Tumor Area (mm²)	0.59743		Tumor Area (mm²)	0.46325		Tumor Area (mm²)	0.47415		Tumor Area (mm²)	0.61796		Tumor Area (mm²)	0.92102		Tumor Area (mm²)	0.63023		Tumor Area (mm²)	0.98512		Tumor Area (mm²)	0.45221
		Necrosis Area (mm²)	0.00012		Necrosis Area (mm²)	0		Necrosis Area (mm²)	0		Necrosis Area (mm²)	0.0001		Necrosis Area (mm²)	0		Necrosis Area (mm²)	0		Necrosis Area (mm²)	6e-05		Necrosis Area (mm²)	0
		Empty Area (mm²)	0.00447		Empty Area (mm²)	0.00193		Empty Area (mm²)	0.00286		Empty Area (mm²)	0.0002		Empty Area (mm²)	0.00069		Empty Area (mm²)	0.00117		Empty Area (mm²)	0.0021		Empty Area (mm²)	0.0014
		Normal Area (mm²)	0.00038		Normal Area (mm²)	0.0002		Normal Area (mm²)	0.00274		Normal Area (mm²)	0.0072		Normal Area (mm²)	0.01004		Normal Area (mm²)	0.00265		Normal Area (mm²)	0.00335		Normal Area (mm²)	0.00223
		Total Cells	2657		Total Cells	1966		Total Cells	1979		Total Cells	3312		Total Cells	4692		Total Cells	2916		Total Cells	4950		Total Cells	2190
		Stain 1 Positive Cells	41		Stain 1 Positive Cells	10		Stain 1 Positive Cells	34		Stain 1 Positive Cells	52		Stain 1 Positive Cells	60		Stain 1 Positive Cells	38		Stain 1 Positive Cells	39		Stain 1 Positive Cells	32
		Stain 1 0+ Cells	2616		Stain 1 0+ Cells	1956		Stain 1 0+ Cells	1945		Stain 1 0+ Cells	3260		Stain 1 0+ Cells	4632		Stain 1 0+ Cells	2878		Stain 1 0+ Cells	4911		Stain 1 0+ Cells	2158
		Stain 1 1+ Cells	23		Stain 1 1+ Cells	6		Stain 1 1+ Cells	20		Stain 1 1+ Cells	36		Stain 1 1+ Cells	36		Stain 1 1+ Cells	20		Stain 1 1+ Cells	21		Stain 1 1+ Cells	22
		Stain 1 2+ Cells	11		Stain 1 2+ Cells	4		Stain 1 2+ Cells	7		Stain 1 2+ Cells	11		Stain 1 2+ Cells	17		Stain 1 2+ Cells	11		Stain 1 2+ Cells	15		Stain 1 2+ Cells	9
		Stain 1 3+ Cells	7		Stain 1 3+ Cells	0		Stain 1 3+ Cells	7		Stain 1 3+ Cells	5		Stain 1 3+ Cells	7		Stain 1 3+ Cells	7		Stain 1 3+ Cells	3		Stain 1 3+ Cells	1
		Stain 2 Positive Cells	0		Stain 2 Positive Cells	0		Stain 2 Positive Cells	0		Stain 2 Positive Cells	0		Stain 2 Positive Cells	0		Stain 2 Positive Cells	0		Stain 2 Positive Cells	0		Stain 2 Positive Cells	0
		Stain 2 0+ Cells	2657		Stain 2 0+ Cells	1966		Stain 2 0+ Cells	1979		Stain 2 0+ Cells	3312		Stain 2 0+ Cells	4692		Stain 2 0+ Cells	2916		Stain 2 0+ Cells	4950		Stain 2 0+ Cells	2190
		Stain 2 1+ Cells	0		Stain 2 1+ Cells	0		Stain 2 1+ Cells	0		Stain 2 1+ Cells	0		Stain 2 1+ Cells	0		Stain 2 1+ Cells	0		Stain 2 1+ Cells	0		Stain 2 1+ Cells	0
		Stain 2 2+ Cells	0		Stain 2 2+ Cells	0		Stain 2 2+ Cells	0		Stain 2 2+ Cells	0		Stain 2 2+ Cells	0		Stain 2 2+ Cells	0		Stain 2 2+ Cells	0		Stain 2 2+ Cells	0
		Stain 2 3+ Cells	0		Stain 2 3+ Cells	0		Stain 2 3+ Cells	0		Stain 2 3+ Cells	0		Stain 2 3+ Cells	0		Stain 2 3+ Cells	0		Stain 2 3+ Cells	0		Stain 2 3+ Cells	0
		Dual Positive Cells	0		Dual Positive Cells	0		Dual Positive Cells	0		Dual Positive Cells	0		Dual Positive Cells	0		Dual Positive Cells	0		Dual Positive Cells	0		Dual Positive Cells	0
		Dual Negative Cells	2616		Dual Negative Cells	1956		Dual Negative Cells	1945		Dual Negative Cells	3260		Dual Negative Cells	4632		Dual Negative Cells	2878		Dual Negative Cells	4911		Dual Negative Cells	2158
		% Stain 1 Positive Cells	1.54309		% Stain 1 Positive Cells	0.508647		% Stain 1 Positive Cells	1.71804		% Stain 1 Positive Cells	1.57005		% Stain 1 Positive Cells	1.27877		% Stain 1 Positive Cells	1.30316		% Stain 1 Positive Cells	0.787879		% Stain 1 Positive Cells	1.46119
		% Stain 1 0+ Cells	98.4569		% Stain 1 0+ Cells	99.4914		% Stain 1 0+ Cells	98.282		% Stain 1 0+ Cells	98.43		% Stain 1 0+ Cells	98.7212		% Stain 1 0+ Cells	98.6968		% Stain 1 0+ Cells	99.2121		% Stain 1 0+ Cells	98.5388
		% Stain 1 1+ Cells	0.865638		% Stain 1 1+ Cells	0.305188		% Stain 1 1+ Cells	1.01061		% Stain 1 1+ Cells	1.08696		% Stain 1 1+ Cells	0.767263		% Stain 1 1+ Cells	0.685871		% Stain 1 1+ Cells	0.424242		% Stain 1 1+ Cells	1.00457
		% Stain 1 2+ Cells	0.414001		% Stain 1 2+ Cells	0.203459		% Stain 1 2+ Cells	0.353714		% Stain 1 2+ Cells	0.332126		% Stain 1 2+ Cells	0.362319		% Stain 1 2+ Cells	0.377229		% Stain 1 2+ Cells	0.30303		% Stain 1 2+ Cells	0.410959
		% Stain 1 3+ Cells	0.263455		% Stain 1 3+ Cells	0		% Stain 1 3+ Cells	0.353714		% Stain 1 3+ Cells	0.150966		% Stain 1 3+ Cells	0.14919		% Stain 1 3+ Cells	0.240055		% Stain 1 3+ Cells	0.0606061		% Stain 1 3+ Cells	0.0456621
		Stain 1 H-Score	2.484		Stain 1 H-Score	0.712106		Stain 1 H-Score	2.77918		Stain 1 H-Score	2.20411		Stain 1 H-Score	1.93947		Stain 1 H-Score	2.16049		Stain 1 H-Score	1.21212		Stain 1 H-Score	1.96347
		% Stain 2 Positive Cells	0		% Stain 2 Positive Cells	0		% Stain 2 Positive Cells	0		% Stain 2 Positive Cells	0		% Stain 2 Positive Cells	0		% Stain 2 Positive Cells	0		% Stain 2 Positive Cells	0		% Stain 2 Positive Cells	0
		% Stain 2 0+ Cells	100		% Stain 2 0+ Cells	100		% Stain 2 0+ Cells	100		% Stain 2 0+ Cells	100		% Stain 2 0+ Cells	100		% Stain 2 0+ Cells	100		% Stain 2 0+ Cells	100		% Stain 2 0+ Cells	100
		% Stain 2 1+ Cells	0		% Stain 2 1+ Cells	0		% Stain 2 1+ Cells	0		% Stain 2 1+ Cells	0		% Stain 2 1+ Cells	0		% Stain 2 1+ Cells	0		% Stain 2 1+ Cells	0		% Stain 2 1+ Cells	0
		% Stain 2 2+ Cells	0		% Stain 2 2+ Cells	0		% Stain 2 2+ Cells	0		% Stain 2 2+ Cells	0		% Stain 2 2+ Cells	0		% Stain 2 2+ Cells	0		% Stain 2 2+ Cells	0		% Stain 2 2+ Cells	0
		% Stain 2 3+ Cells	0		% Stain 2 3+ Cells	0		% Stain 2 3+ Cells	0		% Stain 2 3+ Cells	0		% Stain 2 3+ Cells	0		% Stain 2 3+ Cells	0		% Stain 2 3+ Cells	0		% Stain 2 3+ Cells	0
		Stain 2 H-Score	0		Stain 2 H-Score	0		Stain 2 H-Score	0		Stain 2 H-Score	0		Stain 2 H-Score	0		Stain 2 H-Score	0		Stain 2 H-Score	0		Stain 2 H-Score	0
		% Dual Positive Cells	0		% Dual Positive Cells	0		% Dual Positive Cells	0		% Dual Positive Cells	0		% Dual Positive Cells	0		% Dual Positive Cells	0		% Dual Positive Cells	0		% Dual Positive Cells	0
		% Dual Negative Cells	98.4569		% Dual Negative Cells	99.4914		% Dual Negative Cells	98.282		% Dual Negative Cells	98.43		% Dual Negative Cells	98.7212		% Dual Negative Cells	98.6968		% Dual Negative Cells	99.2121		% Dual Negative Cells	98.5388
		Avg Stain 1 Nuclear OD	0.0354143		Avg Stain 1 Nuclear OD	0.0301692		Avg Stain 1 Nuclear OD	0.0370879		Avg Stain 1 Nuclear OD	0.036699		Avg Stain 1 Nuclear OD	0.0355463		Avg Stain 1 Nuclear OD	0.035818		Avg Stain 1 Nuclear OD	0.0314763		Avg Stain 1 Nuclear OD	0.0381334
		Avg Stain 2 Nuclear OD	0.0373165		Avg Stain 2 Nuclear OD	0.0372719		Avg Stain 2 Nuclear OD	0.0375737		Avg Stain 2 Nuclear OD	0.0367912		Avg Stain 2 Nuclear OD	0.036877		Avg Stain 2 Nuclear OD	0.0375468		Avg Stain 2 Nuclear OD	0.0375401		Avg Stain 2 Nuclear OD	0.0356337
		Avg Stain 1 Cytoplasmic OD	0.0298762		Avg Stain 1 Cytoplasmic OD	0.028871		Avg Stain 1 Cytoplasmic OD	0.0305767		Avg Stain 1 Cytoplasmic OD	0.0315642		Avg Stain 1 Cytoplasmic OD	0.0309758		Avg Stain 1 Cytoplasmic OD	0.0307884		Avg Stain 1 Cytoplasmic OD	0.0295659		Avg Stain 1 Cytoplasmic OD	0.0347126
		Avg Stain 2 Cytoplasmic OD	0.0324291		Avg Stain 2 Cytoplasmic OD	0.0325077		Avg Stain 2 Cytoplasmic OD	0.0323749		Avg Stain 2 Cytoplasmic OD	0.0318185		Avg Stain 2 Cytoplasmic OD	0.0318936		Avg Stain 2 Cytoplasmic OD	0.0322144		Avg Stain 2 Cytoplasmic OD	0.0321666		Avg Stain 2 Cytoplasmic OD	0.0317743
		Avg Cell Area (µm²)	86.7153		Avg Cell Area (µm²)	87.8679		Avg Cell Area (µm²)	89.9531		Avg Cell Area (µm²)	89.0993		Avg Cell Area (µm²)	96.5864		Avg Cell Area (µm²)	92.1648		Avg Cell Area (µm²)	88.0459		Avg Cell Area (µm²)	85.6707
		Avg Cytoplasm Area (µm²)	54.0441		Avg Cytoplasm Area (µm²)	55.3505		Avg Cytoplasm Area (µm²)	56.1663		Avg Cytoplasm Area (µm²)	57.1027		Avg Cytoplasm Area (µm²)	63.3641		Avg Cytoplasm Area (µm²)	58.5582		Avg Cytoplasm Area (µm²)	56.2728		Avg Cytoplasm Area (µm²)	56.4274
		Avg Nucleus Area (µm²)	32.6712		Avg Nucleus Area (µm²)	32.5173		Avg Nucleus Area (µm²)	33.7867		Avg Nucleus Area (µm²)	31.9966		Avg Nucleus Area (µm²)	33.2223		Avg Nucleus Area (µm²)	33.6066		Avg Nucleus Area (µm²)	31.7731		Avg Nucleus Area (µm²)	29.2433
		Avg Nucleus Perimeter (µm)	12.9139		Avg Nucleus Perimeter (µm)	12.8692		Avg Nucleus Perimeter (µm)	13.3362		Avg Nucleus Perimeter (µm)	12.6585		Avg Nucleus Perimeter (µm)	13.1518		Avg Nucleus Perimeter (µm)	13.2607		Avg Nucleus Perimeter (µm)	12.5811		Avg Nucleus Perimeter (µm)	11.5943
		Avg Nucleus Roundness	0.664437		Avg Nucleus Roundness	0.669471		Avg Nucleus Roundness	0.668392		Avg Nucleus Roundness	0.673112		Avg Nucleus Roundness	0.675628		Avg Nucleus Roundness	0.66988		Avg Nucleus Roundness	0.669896		Avg Nucleus Roundness	0.672199
		Tissue Area (µm²)	406060		Tissue Area (µm²)	305186		Tissue Area (µm²)	305622		Tissue Area (µm²)	542432		Tissue Area (µm²)	869529		Tissue Area (µm²)	479484		Tissue Area (µm²)	799104		Tissue Area (µm²)	350348
		Tumor: Total Cells	2657		Tumor: Total Cells	1966		Tumor: Total Cells	1979		Tumor: Total Cells	3312		Tumor: Total Cells	4692		Tumor: Total Cells	2916		Tumor: Total Cells	4950		Tumor: Total Cells	2190
		Tumor: Stain 1 Positive Cells	41		Tumor: Stain 1 Positive Cells	10		Tumor: Stain 1 Positive Cells	34		Tumor: Stain 1 Positive Cells	52		Tumor: Stain 1 Positive Cells	60		Tumor: Stain 1 Positive Cells	38		Tumor: Stain 1 Positive Cells	39		Tumor: Stain 1 Positive Cells	32
		Tumor: Stain 1 0+ Cells	2616		Tumor: Stain 1 0+ Cells	1956		Tumor: Stain 1 0+ Cells	1945		Tumor: Stain 1 0+ Cells	3260		Tumor: Stain 1 0+ Cells	4632		Tumor: Stain 1 0+ Cells	2878		Tumor: Stain 1 0+ Cells	4911		Tumor: Stain 1 0+ Cells	2158
		Tumor: Stain 1 1+ Cells	23		Tumor: Stain 1 1+ Cells	6		Tumor: Stain 1 1+ Cells	20		Tumor: Stain 1 1+ Cells	36		Tumor: Stain 1 1+ Cells	36		Tumor: Stain 1 1+ Cells	20		Tumor: Stain 1 1+ Cells	21		Tumor: Stain 1 1+ Cells	22
		Tumor: Stain 1 2+ Cells	11		Tumor: Stain 1 2+ Cells	4		Tumor: Stain 1 2+ Cells	7		Tumor: Stain 1 2+ Cells	11		Tumor: Stain 1 2+ Cells	17		Tumor: Stain 1 2+ Cells	11		Tumor: Stain 1 2+ Cells	15		Tumor: Stain 1 2+ Cells	9
		Tumor: Stain 1 3+ Cells	7		Tumor: Stain 1 3+ Cells	0		Tumor: Stain 1 3+ Cells	7		Tumor: Stain 1 3+ Cells	5		Tumor: Stain 1 3+ Cells	7		Tumor: Stain 1 3+ Cells	7		Tumor: Stain 1 3+ Cells	3		Tumor: Stain 1 3+ Cells	1
		Tumor: Stain 2 Positive Cells	0		Tumor: Stain 2 Positive Cells	0		Tumor: Stain 2 Positive Cells	0		Tumor: Stain 2 Positive Cells	0		Tumor: Stain 2 Positive Cells	0		Tumor: Stain 2 Positive Cells	0		Tumor: Stain 2 Positive Cells	0		Tumor: Stain 2 Positive Cells	0
		Tumor: Stain 2 0+ Cells	2657		Tumor: Stain 2 0+ Cells	1966		Tumor: Stain 2 0+ Cells	1979		Tumor: Stain 2 0+ Cells	3312		Tumor: Stain 2 0+ Cells	4692		Tumor: Stain 2 0+ Cells	2916		Tumor: Stain 2 0+ Cells	4950		Tumor: Stain 2 0+ Cells	2190
		Tumor: Stain 2 1+ Cells	0		Tumor: Stain 2 1+ Cells	0		Tumor: Stain 2 1+ Cells	0		Tumor: Stain 2 1+ Cells	0		Tumor: Stain 2 1+ Cells	0		Tumor: Stain 2 1+ Cells	0		Tumor: Stain 2 1+ Cells	0		Tumor: Stain 2 1+ Cells	0
		Tumor: Stain 2 2+ Cells	0		Tumor: Stain 2 2+ Cells	0		Tumor: Stain 2 2+ Cells	0		Tumor: Stain 2 2+ Cells	0		Tumor: Stain 2 2+ Cells	0		Tumor: Stain 2 2+ Cells	0		Tumor: Stain 2 2+ Cells	0		Tumor: Stain 2 2+ Cells	0
		Tumor: Stain 2 3+ Cells	0		Tumor: Stain 2 3+ Cells	0		Tumor: Stain 2 3+ Cells	0		Tumor: Stain 2 3+ Cells	0		Tumor: Stain 2 3+ Cells	0		Tumor: Stain 2 3+ Cells	0		Tumor: Stain 2 3+ Cells	0		Tumor: Stain 2 3+ Cells	0
		Tumor: Dual Positive Cells	0		Tumor: Dual Positive Cells	0		Tumor: Dual Positive Cells	0		Tumor: Dual Positive Cells	0		Tumor: Dual Positive Cells	0		Tumor: Dual Positive Cells	0		Tumor: Dual Positive Cells	0		Tumor: Dual Positive Cells	0
		Tumor: Dual Negative Cells	2616		Tumor: Dual Negative Cells	1956		Tumor: Dual Negative Cells	1945		Tumor: Dual Negative Cells	3260		Tumor: Dual Negative Cells	4632		Tumor: Dual Negative Cells	2878		Tumor: Dual Negative Cells	4911		Tumor: Dual Negative Cells	2158
		Tumor: % Stain 1 Positive Cells	1.54309		Tumor: % Stain 1 Positive Cells	0.508647		Tumor: % Stain 1 Positive Cells	1.71804		Tumor: % Stain 1 Positive Cells	1.57005		Tumor: % Stain 1 Positive Cells	1.27877		Tumor: % Stain 1 Positive Cells	1.30316		Tumor: % Stain 1 Positive Cells	0.787879		Tumor: % Stain 1 Positive Cells	1.46119		1.27135
		Tumor: % Stain 1 0+ Cells	98.4569		Tumor: % Stain 1 0+ Cells	99.4914		Tumor: % Stain 1 0+ Cells	98.282		Tumor: % Stain 1 0+ Cells	98.43		Tumor: % Stain 1 0+ Cells	98.7212		Tumor: % Stain 1 0+ Cells	98.6968		Tumor: % Stain 1 0+ Cells	99.2121		Tumor: % Stain 1 0+ Cells	98.5388
		Tumor: % Stain 1 1+ Cells	0.865638		Tumor: % Stain 1 1+ Cells	0.305188		Tumor: % Stain 1 1+ Cells	1.01061		Tumor: % Stain 1 1+ Cells	1.08696		Tumor: % Stain 1 1+ Cells	0.767263		Tumor: % Stain 1 1+ Cells	0.685871		Tumor: % Stain 1 1+ Cells	0.424242		Tumor: % Stain 1 1+ Cells	1.00457
		Tumor: % Stain 1 2+ Cells	0.414001		Tumor: % Stain 1 2+ Cells	0.203459		Tumor: % Stain 1 2+ Cells	0.353714		Tumor: % Stain 1 2+ Cells	0.332126		Tumor: % Stain 1 2+ Cells	0.362319		Tumor: % Stain 1 2+ Cells	0.377229		Tumor: % Stain 1 2+ Cells	0.30303		Tumor: % Stain 1 2+ Cells	0.410959
		Tumor: % Stain 1 3+ Cells	0.263455		Tumor: % Stain 1 3+ Cells	0		Tumor: % Stain 1 3+ Cells	0.353714		Tumor: % Stain 1 3+ Cells	0.150966		Tumor: % Stain 1 3+ Cells	0.14919		Tumor: % Stain 1 3+ Cells	0.240055		Tumor: % Stain 1 3+ Cells	0.0606061		Tumor: % Stain 1 3+ Cells	0.0456621
		Tumor: Stain 1 H-Score	2.484		Tumor: Stain 1 H-Score	0.712106		Tumor: Stain 1 H-Score	2.77918		Tumor: Stain 1 H-Score	2.20411		Tumor: Stain 1 H-Score	1.93947		Tumor: Stain 1 H-Score	2.16049		Tumor: Stain 1 H-Score	1.21212		Tumor: Stain 1 H-Score	1.96347
		Tumor: % Stain 2 Positive Cells	0		Tumor: % Stain 2 Positive Cells	0		Tumor: % Stain 2 Positive Cells	0		Tumor: % Stain 2 Positive Cells	0		Tumor: % Stain 2 Positive Cells	0		Tumor: % Stain 2 Positive Cells	0		Tumor: % Stain 2 Positive Cells	0		Tumor: % Stain 2 Positive Cells	0
		Tumor: % Stain 2 0+ Cells	100		Tumor: % Stain 2 0+ Cells	100		Tumor: % Stain 2 0+ Cells	100		Tumor: % Stain 2 0+ Cells	100		Tumor: % Stain 2 0+ Cells	100		Tumor: % Stain 2 0+ Cells	100		Tumor: % Stain 2 0+ Cells	100		Tumor: % Stain 2 0+ Cells	100
		Tumor: % Stain 2 1+ Cells	0		Tumor: % Stain 2 1+ Cells	0		Tumor: % Stain 2 1+ Cells	0		Tumor: % Stain 2 1+ Cells	0		Tumor: % Stain 2 1+ Cells	0		Tumor: % Stain 2 1+ Cells	0		Tumor: % Stain 2 1+ Cells	0		Tumor: % Stain 2 1+ Cells	0
		Tumor: % Stain 2 2+ Cells	0		Tumor: % Stain 2 2+ Cells	0		Tumor: % Stain 2 2+ Cells	0		Tumor: % Stain 2 2+ Cells	0		Tumor: % Stain 2 2+ Cells	0		Tumor: % Stain 2 2+ Cells	0		Tumor: % Stain 2 2+ Cells	0		Tumor: % Stain 2 2+ Cells	0
		Tumor: % Stain 2 3+ Cells	0		Tumor: % Stain 2 3+ Cells	0		Tumor: % Stain 2 3+ Cells	0		Tumor: % Stain 2 3+ Cells	0		Tumor: % Stain 2 3+ Cells	0		Tumor: % Stain 2 3+ Cells	0		Tumor: % Stain 2 3+ Cells	0		Tumor: % Stain 2 3+ Cells	0
		Tumor: Stain 2 H-Score	0		Tumor: Stain 2 H-Score	0		Tumor: Stain 2 H-Score	0		Tumor: Stain 2 H-Score	0		Tumor: Stain 2 H-Score	0		Tumor: Stain 2 H-Score	0		Tumor: Stain 2 H-Score	0		Tumor: Stain 2 H-Score	0
		Tumor: % Dual Positive Cells	0		Tumor: % Dual Positive Cells	0		Tumor: % Dual Positive Cells	0		Tumor: % Dual Positive Cells	0		Tumor: % Dual Positive Cells	0		Tumor: % Dual Positive Cells	0		Tumor: % Dual Positive Cells	0		Tumor: % Dual Positive Cells	0
		Tumor: % Dual Negative Cells	98.4569		Tumor: % Dual Negative Cells	99.4914		Tumor: % Dual Negative Cells	98.282		Tumor: % Dual Negative Cells	98.43		Tumor: % Dual Negative Cells	98.7212		Tumor: % Dual Negative Cells	98.6968		Tumor: % Dual Negative Cells	99.2121		Tumor: % Dual Negative Cells	98.5388
		Tumor: Avg Stain 1 Nuclear OD	0.0354143		Tumor: Avg Stain 1 Nuclear OD	0.0301692		Tumor: Avg Stain 1 Nuclear OD	0.0370879		Tumor: Avg Stain 1 Nuclear OD	0.036699		Tumor: Avg Stain 1 Nuclear OD	0.0355463		Tumor: Avg Stain 1 Nuclear OD	0.035818		Tumor: Avg Stain 1 Nuclear OD	0.0314763		Tumor: Avg Stain 1 Nuclear OD	0.0381334
		Tumor: Avg Stain 2 Nuclear OD	0.0373165		Tumor: Avg Stain 2 Nuclear OD	0.0372719		Tumor: Avg Stain 2 Nuclear OD	0.0375737		Tumor: Avg Stain 2 Nuclear OD	0.0367912		Tumor: Avg Stain 2 Nuclear OD	0.036877		Tumor: Avg Stain 2 Nuclear OD	0.0375468		Tumor: Avg Stain 2 Nuclear OD	0.0375401		Tumor: Avg Stain 2 Nuclear OD	0.0356337
		Tumor: Avg Stain 1 Cytoplasmic OD	0.0298762		Tumor: Avg Stain 1 Cytoplasmic OD	0.028871		Tumor: Avg Stain 1 Cytoplasmic OD	0.0305767		Tumor: Avg Stain 1 Cytoplasmic OD	0.0315642		Tumor: Avg Stain 1 Cytoplasmic OD	0.0309758		Tumor: Avg Stain 1 Cytoplasmic OD	0.0307884		Tumor: Avg Stain 1 Cytoplasmic OD	0.0295659		Tumor: Avg Stain 1 Cytoplasmic OD	0.0347126
		Tumor: Avg Stain 2 Cytoplasmic OD	0.0324291		Tumor: Avg Stain 2 Cytoplasmic OD	0.0325077		Tumor: Avg Stain 2 Cytoplasmic OD	0.0323749		Tumor: Avg Stain 2 Cytoplasmic OD	0.0318185		Tumor: Avg Stain 2 Cytoplasmic OD	0.0318936		Tumor: Avg Stain 2 Cytoplasmic OD	0.0322144		Tumor: Avg Stain 2 Cytoplasmic OD	0.0321666		Tumor: Avg Stain 2 Cytoplasmic OD	0.0317743
		Tumor: Avg Cell Area (µm²)	86.7153		Tumor: Avg Cell Area (µm²)	87.8679		Tumor: Avg Cell Area (µm²)	89.9531		Tumor: Avg Cell Area (µm²)	89.0993		Tumor: Avg Cell Area (µm²)	96.5864		Tumor: Avg Cell Area (µm²)	92.1648		Tumor: Avg Cell Area (µm²)	88.0459		Tumor: Avg Cell Area (µm²)	85.6707
		Tumor: Avg Cytoplasm Area (µm²)	54.0441		Tumor: Avg Cytoplasm Area (µm²)	55.3505		Tumor: Avg Cytoplasm Area (µm²)	56.1663		Tumor: Avg Cytoplasm Area (µm²)	57.1027		Tumor: Avg Cytoplasm Area (µm²)	63.3641		Tumor: Avg Cytoplasm Area (µm²)	58.5582		Tumor: Avg Cytoplasm Area (µm²)	56.2728		Tumor: Avg Cytoplasm Area (µm²)	56.4274
		Tumor: Avg Nucleus Area (µm²)	32.6712		Tumor: Avg Nucleus Area (µm²)	32.5173		Tumor: Avg Nucleus Area (µm²)	33.7867		Tumor: Avg Nucleus Area (µm²)	31.9966		Tumor: Avg Nucleus Area (µm²)	33.2223		Tumor: Avg Nucleus Area (µm²)	33.6066		Tumor: Avg Nucleus Area (µm²)	31.7731		Tumor: Avg Nucleus Area (µm²)	29.2433
		Tumor: Avg Nucleus Perimeter (µm)	12.9139		Tumor: Avg Nucleus Perimeter (µm)	12.8692		Tumor: Avg Nucleus Perimeter (µm)	13.3362		Tumor: Avg Nucleus Perimeter (µm)	12.6585		Tumor: Avg Nucleus Perimeter (µm)	13.1518		Tumor: Avg Nucleus Perimeter (µm)	13.2607		Tumor: Avg Nucleus Perimeter (µm)	12.5811		Tumor: Avg Nucleus Perimeter (µm)	11.5943
		Tumor: Avg Nucleus Roundness	0.664437		Tumor: Avg Nucleus Roundness	0.669471		Tumor: Avg Nucleus Roundness	0.668392		Tumor: Avg Nucleus Roundness	0.673112		Tumor: Avg Nucleus Roundness	0.675628		Tumor: Avg Nucleus Roundness	0.66988		Tumor: Avg Nucleus Roundness	0.669896		Tumor: Avg Nucleus Roundness	0.672199
		Tumor: Tissue Area (µm²)	406060		Tumor: Tissue Area (µm²)	305186		Tumor: Tissue Area (µm²)	305622		Tumor: Tissue Area (µm²)	542432		Tumor: Tissue Area (µm²)	869529		Tumor: Tissue Area (µm²)	479484		Tumor: Tissue Area (µm²)	799104		Tumor: Tissue Area (µm²)	350348
		BSNA34.2c
		Name	Value		Name	Value		Name	Value		Name	Value		Name	Value		Name	Value		Name	Value		Name	Value
		Classified Area (mm²)	0.51202		Classified Area (mm²)	0.57537		Classified Area (mm²)	0.59352		Classified Area (mm²)	0.46602		Classified Area (mm²)	0.424		Classified Area (mm²)	0.54459		Classified Area (mm²)	0.7145		Classified Area (mm²)	0.45815
		Tumor Area (mm²)	0.49714		Tumor Area (mm²)	0.56432		Tumor Area (mm²)	0.5798		Tumor Area (mm²)	0.46044		Tumor Area (mm²)	0.41252		Tumor Area (mm²)	0.467		Tumor Area (mm²)	0.70335		Tumor Area (mm²)	0.43156
		Necrosis Area (mm²)	0		Necrosis Area (mm²)	0		Necrosis Area (mm²)	0		Necrosis Area (mm²)	0		Necrosis Area (mm²)	0		Necrosis Area (mm²)	4e-05		Necrosis Area (mm²)	0		Necrosis Area (mm²)	0.00036
		Empty Area (mm²)	5e-05		Empty Area (mm²)	0.00453		Empty Area (mm²)	0.00294		Empty Area (mm²)	0.00035		Empty Area (mm²)	0.00788		Empty Area (mm²)	0.00046		Empty Area (mm²)	0.00013		Empty Area (mm²)	0.00348
		Normal Area (mm²)	0.01483		Normal Area (mm²)	0.00652		Normal Area (mm²)	0.01077		Normal Area (mm²)	0.00524		Normal Area (mm²)	0.00361		Normal Area (mm²)	0.07709		Normal Area (mm²)	0.01102		Normal Area (mm²)	0.02276
		Total Cells	2664		Total Cells	2720		Total Cells	2504		Total Cells	2077		Total Cells	1892		Total Cells	2822		Total Cells	3713		Total Cells	2187
		Stain 1 Positive Cells	26		Stain 1 Positive Cells	11		Stain 1 Positive Cells	16		Stain 1 Positive Cells	10		Stain 1 Positive Cells	8		Stain 1 Positive Cells	23		Stain 1 Positive Cells	25		Stain 1 Positive Cells	5
		Stain 1 0+ Cells	2638		Stain 1 0+ Cells	2709		Stain 1 0+ Cells	2488		Stain 1 0+ Cells	2067		Stain 1 0+ Cells	1884		Stain 1 0+ Cells	2799		Stain 1 0+ Cells	3688		Stain 1 0+ Cells	2182
		Stain 1 1+ Cells	17		Stain 1 1+ Cells	9		Stain 1 1+ Cells	7		Stain 1 1+ Cells	6		Stain 1 1+ Cells	1		Stain 1 1+ Cells	13		Stain 1 1+ Cells	11		Stain 1 1+ Cells	5
		Stain 1 2+ Cells	7		Stain 1 2+ Cells	0		Stain 1 2+ Cells	4		Stain 1 2+ Cells	4		Stain 1 2+ Cells	5		Stain 1 2+ Cells	5		Stain 1 2+ Cells	6		Stain 1 2+ Cells	0
		Stain 1 3+ Cells	2		Stain 1 3+ Cells	2		Stain 1 3+ Cells	5		Stain 1 3+ Cells	0		Stain 1 3+ Cells	2		Stain 1 3+ Cells	5		Stain 1 3+ Cells	8		Stain 1 3+ Cells	0
		Stain 2 Positive Cells	0		Stain 2 Positive Cells	0		Stain 2 Positive Cells	0		Stain 2 Positive Cells	0		Stain 2 Positive Cells	0		Stain 2 Positive Cells	0		Stain 2 Positive Cells	0		Stain 2 Positive Cells	0
		Stain 2 0+ Cells	2664		Stain 2 0+ Cells	2720		Stain 2 0+ Cells	2504		Stain 2 0+ Cells	2077		Stain 2 0+ Cells	1892		Stain 2 0+ Cells	2822		Stain 2 0+ Cells	3713		Stain 2 0+ Cells	2187
		Stain 2 1+ Cells	0		Stain 2 1+ Cells	0		Stain 2 1+ Cells	0		Stain 2 1+ Cells	0		Stain 2 1+ Cells	0		Stain 2 1+ Cells	0		Stain 2 1+ Cells	0		Stain 2 1+ Cells	0
		Stain 2 2+ Cells	0		Stain 2 2+ Cells	0		Stain 2 2+ Cells	0		Stain 2 2+ Cells	0		Stain 2 2+ Cells	0		Stain 2 2+ Cells	0		Stain 2 2+ Cells	0		Stain 2 2+ Cells	0
		Stain 2 3+ Cells	0		Stain 2 3+ Cells	0		Stain 2 3+ Cells	0		Stain 2 3+ Cells	0		Stain 2 3+ Cells	0		Stain 2 3+ Cells	0		Stain 2 3+ Cells	0		Stain 2 3+ Cells	0
		Dual Positive Cells	0		Dual Positive Cells	0		Dual Positive Cells	0		Dual Positive Cells	0		Dual Positive Cells	0		Dual Positive Cells	0		Dual Positive Cells	0		Dual Positive Cells	0
		Dual Negative Cells	2638		Dual Negative Cells	2709		Dual Negative Cells	2488		Dual Negative Cells	2067		Dual Negative Cells	1884		Dual Negative Cells	2799		Dual Negative Cells	3688		Dual Negative Cells	2182
		% Stain 1 Positive Cells	0.975976		% Stain 1 Positive Cells	0.404412		% Stain 1 Positive Cells	0.638978		% Stain 1 Positive Cells	0.481464		% Stain 1 Positive Cells	0.422833		% Stain 1 Positive Cells	0.815025		% Stain 1 Positive Cells	0.67331		% Stain 1 Positive Cells	0.228624
		% Stain 1 0+ Cells	99.024		% Stain 1 0+ Cells	99.5956		% Stain 1 0+ Cells	99.361		% Stain 1 0+ Cells	99.5185		% Stain 1 0+ Cells	99.5772		% Stain 1 0+ Cells	99.185		% Stain 1 0+ Cells	99.3267		% Stain 1 0+ Cells	99.7714
		% Stain 1 1+ Cells	0.638138		% Stain 1 1+ Cells	0.330882		% Stain 1 1+ Cells	0.279553		% Stain 1 1+ Cells	0.288878		% Stain 1 1+ Cells	0.0528541		% Stain 1 1+ Cells	0.460666		% Stain 1 1+ Cells	0.296256		% Stain 1 1+ Cells	0.228624
		% Stain 1 2+ Cells	0.262763		% Stain 1 2+ Cells	0		% Stain 1 2+ Cells	0.159744		% Stain 1 2+ Cells	0.192585		% Stain 1 2+ Cells	0.264271		% Stain 1 2+ Cells	0.177179		% Stain 1 2+ Cells	0.161594		% Stain 1 2+ Cells	0
		% Stain 1 3+ Cells	0.0750751		% Stain 1 3+ Cells	0.0735294		% Stain 1 3+ Cells	0.199681		% Stain 1 3+ Cells	0		% Stain 1 3+ Cells	0.105708		% Stain 1 3+ Cells	0.177179		% Stain 1 3+ Cells	0.215459		% Stain 1 3+ Cells	0
		Stain 1 H-Score	1.38889		Stain 1 H-Score	0.551471		Stain 1 H-Score	1.19808		Stain 1 H-Score	0.674049		Stain 1 H-Score	0.89852		Stain 1 H-Score	1.34656		Stain 1 H-Score	1.26582		Stain 1 H-Score	0.228624
		% Stain 2 Positive Cells	0		% Stain 2 Positive Cells	0		% Stain 2 Positive Cells	0		% Stain 2 Positive Cells	0		% Stain 2 Positive Cells	0		% Stain 2 Positive Cells	0		% Stain 2 Positive Cells	0		% Stain 2 Positive Cells	0
		% Stain 2 0+ Cells	100		% Stain 2 0+ Cells	100		% Stain 2 0+ Cells	100		% Stain 2 0+ Cells	100		% Stain 2 0+ Cells	100		% Stain 2 0+ Cells	100		% Stain 2 0+ Cells	100		% Stain 2 0+ Cells	100
		% Stain 2 1+ Cells	0		% Stain 2 1+ Cells	0		% Stain 2 1+ Cells	0		% Stain 2 1+ Cells	0		% Stain 2 1+ Cells	0		% Stain 2 1+ Cells	0		% Stain 2 1+ Cells	0		% Stain 2 1+ Cells	0
		% Stain 2 2+ Cells	0		% Stain 2 2+ Cells	0		% Stain 2 2+ Cells	0		% Stain 2 2+ Cells	0		% Stain 2 2+ Cells	0		% Stain 2 2+ Cells	0		% Stain 2 2+ Cells	0		% Stain 2 2+ Cells	0
		% Stain 2 3+ Cells	0		% Stain 2 3+ Cells	0		% Stain 2 3+ Cells	0		% Stain 2 3+ Cells	0		% Stain 2 3+ Cells	0		% Stain 2 3+ Cells	0		% Stain 2 3+ Cells	0		% Stain 2 3+ Cells	0
		Stain 2 H-Score	0		Stain 2 H-Score	0		Stain 2 H-Score	0		Stain 2 H-Score	0		Stain 2 H-Score	0		Stain 2 H-Score	0		Stain 2 H-Score	0		Stain 2 H-Score	0
		% Dual Positive Cells	0		% Dual Positive Cells	0		% Dual Positive Cells	0		% Dual Positive Cells	0		% Dual Positive Cells	0		% Dual Positive Cells	0		% Dual Positive Cells	0		% Dual Positive Cells	0
		% Dual Negative Cells	99.024		% Dual Negative Cells	99.5956		% Dual Negative Cells	99.361		% Dual Negative Cells	99.5185		% Dual Negative Cells	99.5772		% Dual Negative Cells	99.185		% Dual Negative Cells	99.3267		% Dual Negative Cells	99.7714
		Avg Stain 1 Nuclear OD	0.0320655		Avg Stain 1 Nuclear OD	0.0292678		Avg Stain 1 Nuclear OD	0.0306932		Avg Stain 1 Nuclear OD	0.0300478		Avg Stain 1 Nuclear OD	0.0303266		Avg Stain 1 Nuclear OD	0.0323355		Avg Stain 1 Nuclear OD	0.0310881		Avg Stain 1 Nuclear OD	0.0281705
		Avg Stain 2 Nuclear OD	0.0374401		Avg Stain 2 Nuclear OD	0.0374782		Avg Stain 2 Nuclear OD	0.0375186		Avg Stain 2 Nuclear OD	0.0371916		Avg Stain 2 Nuclear OD	0.0378303		Avg Stain 2 Nuclear OD	0.0368327		Avg Stain 2 Nuclear OD	0.0374688		Avg Stain 2 Nuclear OD	0.0378473
		Avg Stain 1 Cytoplasmic OD	0.0291281		Avg Stain 1 Cytoplasmic OD	0.0284152		Avg Stain 1 Cytoplasmic OD	0.0287621		Avg Stain 1 Cytoplasmic OD	0.0287493		Avg Stain 1 Cytoplasmic OD	0.0287795		Avg Stain 1 Cytoplasmic OD	0.0307143		Avg Stain 1 Cytoplasmic OD	0.0294351		Avg Stain 1 Cytoplasmic OD	0.0285138
		Avg Stain 2 Cytoplasmic OD	0.0326422		Avg Stain 2 Cytoplasmic OD	0.0326537		Avg Stain 2 Cytoplasmic OD	0.0327803		Avg Stain 2 Cytoplasmic OD	0.0324333		Avg Stain 2 Cytoplasmic OD	0.0329149		Avg Stain 2 Cytoplasmic OD	0.0318383		Avg Stain 2 Cytoplasmic OD	0.0323054		Avg Stain 2 Cytoplasmic OD	0.0325602
		Avg Cell Area (µm²)	92.948		Avg Cell Area (µm²)	95.076		Avg Cell Area (µm²)	97.3312		Avg Cell Area (µm²)	100.323		Avg Cell Area (µm²)	85.8218		Avg Cell Area (µm²)	89.2704		Avg Cell Area (µm²)	90.0437		Avg Cell Area (µm²)	86.3551
		Avg Cytoplasm Area (µm²)	62.4758		Avg Cytoplasm Area (µm²)	63.9638		Avg Cytoplasm Area (µm²)	65.071		Avg Cytoplasm Area (µm²)	66.2489		Avg Cytoplasm Area (µm²)	57.5856		Avg Cytoplasm Area (µm²)	57.9244		Avg Cytoplasm Area (µm²)	59.4755		Avg Cytoplasm Area (µm²)	56.0709
		Avg Nucleus Area (µm²)	30.4722		Avg Nucleus Area (µm²)	31.1122		Avg Nucleus Area (µm²)	32.2602		Avg Nucleus Area (µm²)	34.0746		Avg Nucleus Area (µm²)	28.2362		Avg Nucleus Area (µm²)	31.346		Avg Nucleus Area (µm²)	30.5682		Avg Nucleus Area (µm²)	30.2841
		Avg Nucleus Perimeter (µm)	12.0577		Avg Nucleus Perimeter (µm)	12.2662		Avg Nucleus Perimeter (µm)	12.7277		Avg Nucleus Perimeter (µm)	13.4626		Avg Nucleus Perimeter (µm)	11.1979		Avg Nucleus Perimeter (µm)	12.3736		Avg Nucleus Perimeter (µm)	12.0738		Avg Nucleus Perimeter (µm)	11.9793
		Avg Nucleus Roundness	0.675269		Avg Nucleus Roundness	0.674516		Avg Nucleus Roundness	0.673494		Avg Nucleus Roundness	0.680113		Avg Nucleus Roundness	0.672982		Avg Nucleus Roundness	0.670666		Avg Nucleus Roundness	0.672051		Avg Nucleus Roundness	0.66276
		Tissue Area (µm²)	483051		Tissue Area (µm²)	505765		Tissue Area (µm²)	461469		Tissue Area (µm²)	391898		Tissue Area (µm²)	299461		Tissue Area (µm²)	474088		Tissue Area (µm²)	638721		Tissue Area (µm²)	352423
		Tumor: Total Cells	2664		Tumor: Total Cells	2720		Tumor: Total Cells	2504		Tumor: Total Cells	2077		Tumor: Total Cells	1892		Tumor: Total Cells	2822		Tumor: Total Cells	3713		Tumor: Total Cells	2187
		Tumor: Stain 1 Positive Cells	26		Tumor: Stain 1 Positive Cells	11		Tumor: Stain 1 Positive Cells	16		Tumor: Stain 1 Positive Cells	10		Tumor: Stain 1 Positive Cells	8		Tumor: Stain 1 Positive Cells	23		Tumor: Stain 1 Positive Cells	25		Tumor: Stain 1 Positive Cells	5
		Tumor: Stain 1 0+ Cells	2638		Tumor: Stain 1 0+ Cells	2709		Tumor: Stain 1 0+ Cells	2488		Tumor: Stain 1 0+ Cells	2067		Tumor: Stain 1 0+ Cells	1884		Tumor: Stain 1 0+ Cells	2799		Tumor: Stain 1 0+ Cells	3688		Tumor: Stain 1 0+ Cells	2182
		Tumor: Stain 1 1+ Cells	17		Tumor: Stain 1 1+ Cells	9		Tumor: Stain 1 1+ Cells	7		Tumor: Stain 1 1+ Cells	6		Tumor: Stain 1 1+ Cells	1		Tumor: Stain 1 1+ Cells	13		Tumor: Stain 1 1+ Cells	11		Tumor: Stain 1 1+ Cells	5
		Tumor: Stain 1 2+ Cells	7		Tumor: Stain 1 2+ Cells	0		Tumor: Stain 1 2+ Cells	4		Tumor: Stain 1 2+ Cells	4		Tumor: Stain 1 2+ Cells	5		Tumor: Stain 1 2+ Cells	5		Tumor: Stain 1 2+ Cells	6		Tumor: Stain 1 2+ Cells	0
		Tumor: Stain 1 3+ Cells	2		Tumor: Stain 1 3+ Cells	2		Tumor: Stain 1 3+ Cells	5		Tumor: Stain 1 3+ Cells	0		Tumor: Stain 1 3+ Cells	2		Tumor: Stain 1 3+ Cells	5		Tumor: Stain 1 3+ Cells	8		Tumor: Stain 1 3+ Cells	0
		Tumor: Stain 2 Positive Cells	0		Tumor: Stain 2 Positive Cells	0		Tumor: Stain 2 Positive Cells	0		Tumor: Stain 2 Positive Cells	0		Tumor: Stain 2 Positive Cells	0		Tumor: Stain 2 Positive Cells	0		Tumor: Stain 2 Positive Cells	0		Tumor: Stain 2 Positive Cells	0
		Tumor: Stain 2 0+ Cells	2664		Tumor: Stain 2 0+ Cells	2720		Tumor: Stain 2 0+ Cells	2504		Tumor: Stain 2 0+ Cells	2077		Tumor: Stain 2 0+ Cells	1892		Tumor: Stain 2 0+ Cells	2822		Tumor: Stain 2 0+ Cells	3713		Tumor: Stain 2 0+ Cells	2187
		Tumor: Stain 2 1+ Cells	0		Tumor: Stain 2 1+ Cells	0		Tumor: Stain 2 1+ Cells	0		Tumor: Stain 2 1+ Cells	0		Tumor: Stain 2 1+ Cells	0		Tumor: Stain 2 1+ Cells	0		Tumor: Stain 2 1+ Cells	0		Tumor: Stain 2 1+ Cells	0
		Tumor: Stain 2 2+ Cells	0		Tumor: Stain 2 2+ Cells	0		Tumor: Stain 2 2+ Cells	0		Tumor: Stain 2 2+ Cells	0		Tumor: Stain 2 2+ Cells	0		Tumor: Stain 2 2+ Cells	0		Tumor: Stain 2 2+ Cells	0		Tumor: Stain 2 2+ Cells	0
		Tumor: Stain 2 3+ Cells	0		Tumor: Stain 2 3+ Cells	0		Tumor: Stain 2 3+ Cells	0		Tumor: Stain 2 3+ Cells	0		Tumor: Stain 2 3+ Cells	0		Tumor: Stain 2 3+ Cells	0		Tumor: Stain 2 3+ Cells	0		Tumor: Stain 2 3+ Cells	0
		Tumor: Dual Positive Cells	0		Tumor: Dual Positive Cells	0		Tumor: Dual Positive Cells	0		Tumor: Dual Positive Cells	0		Tumor: Dual Positive Cells	0		Tumor: Dual Positive Cells	0		Tumor: Dual Positive Cells	0		Tumor: Dual Positive Cells	0
		Tumor: Dual Negative Cells	2638		Tumor: Dual Negative Cells	2709		Tumor: Dual Negative Cells	2488		Tumor: Dual Negative Cells	2067		Tumor: Dual Negative Cells	1884		Tumor: Dual Negative Cells	2799		Tumor: Dual Negative Cells	3688		Tumor: Dual Negative Cells	2182
		Tumor: % Stain 1 Positive Cells	0.975976		Tumor: % Stain 1 Positive Cells	0.404412		Tumor: % Stain 1 Positive Cells	0.638978		Tumor: % Stain 1 Positive Cells	0.481464		Tumor: % Stain 1 Positive Cells	0.422833		Tumor: % Stain 1 Positive Cells	0.815025		Tumor: % Stain 1 Positive Cells	0.67331		Tumor: % Stain 1 Positive Cells	0.228624		0.580078
		Tumor: % Stain 1 0+ Cells	99.024		Tumor: % Stain 1 0+ Cells	99.5956		Tumor: % Stain 1 0+ Cells	99.361		Tumor: % Stain 1 0+ Cells	99.5185		Tumor: % Stain 1 0+ Cells	99.5772		Tumor: % Stain 1 0+ Cells	99.185		Tumor: % Stain 1 0+ Cells	99.3267		Tumor: % Stain 1 0+ Cells	99.7714
		Tumor: % Stain 1 1+ Cells	0.638138		Tumor: % Stain 1 1+ Cells	0.330882		Tumor: % Stain 1 1+ Cells	0.279553		Tumor: % Stain 1 1+ Cells	0.288878		Tumor: % Stain 1 1+ Cells	0.0528541		Tumor: % Stain 1 1+ Cells	0.460666		Tumor: % Stain 1 1+ Cells	0.296256		Tumor: % Stain 1 1+ Cells	0.228624
		Tumor: % Stain 1 2+ Cells	0.262763		Tumor: % Stain 1 2+ Cells	0		Tumor: % Stain 1 2+ Cells	0.159744		Tumor: % Stain 1 2+ Cells	0.192585		Tumor: % Stain 1 2+ Cells	0.264271		Tumor: % Stain 1 2+ Cells	0.177179		Tumor: % Stain 1 2+ Cells	0.161594		Tumor: % Stain 1 2+ Cells	0
		Tumor: % Stain 1 3+ Cells	0.0750751		Tumor: % Stain 1 3+ Cells	0.0735294		Tumor: % Stain 1 3+ Cells	0.199681		Tumor: % Stain 1 3+ Cells	0		Tumor: % Stain 1 3+ Cells	0.105708		Tumor: % Stain 1 3+ Cells	0.177179		Tumor: % Stain 1 3+ Cells	0.215459		Tumor: % Stain 1 3+ Cells	0
		Tumor: Stain 1 H-Score	1.38889		Tumor: Stain 1 H-Score	0.551471		Tumor: Stain 1 H-Score	1.19808		Tumor: Stain 1 H-Score	0.674049		Tumor: Stain 1 H-Score	0.89852		Tumor: Stain 1 H-Score	1.34656		Tumor: Stain 1 H-Score	1.26582		Tumor: Stain 1 H-Score	0.228624
		Tumor: % Stain 2 Positive Cells	0		Tumor: % Stain 2 Positive Cells	0		Tumor: % Stain 2 Positive Cells	0		Tumor: % Stain 2 Positive Cells	0		Tumor: % Stain 2 Positive Cells	0		Tumor: % Stain 2 Positive Cells	0		Tumor: % Stain 2 Positive Cells	0		Tumor: % Stain 2 Positive Cells	0
		Tumor: % Stain 2 0+ Cells	100		Tumor: % Stain 2 0+ Cells	100		Tumor: % Stain 2 0+ Cells	100		Tumor: % Stain 2 0+ Cells	100		Tumor: % Stain 2 0+ Cells	100		Tumor: % Stain 2 0+ Cells	100		Tumor: % Stain 2 0+ Cells	100		Tumor: % Stain 2 0+ Cells	100
		Tumor: % Stain 2 1+ Cells	0		Tumor: % Stain 2 1+ Cells	0		Tumor: % Stain 2 1+ Cells	0		Tumor: % Stain 2 1+ Cells	0		Tumor: % Stain 2 1+ Cells	0		Tumor: % Stain 2 1+ Cells	0		Tumor: % Stain 2 1+ Cells	0		Tumor: % Stain 2 1+ Cells	0
		Tumor: % Stain 2 2+ Cells	0		Tumor: % Stain 2 2+ Cells	0		Tumor: % Stain 2 2+ Cells	0		Tumor: % Stain 2 2+ Cells	0		Tumor: % Stain 2 2+ Cells	0		Tumor: % Stain 2 2+ Cells	0		Tumor: % Stain 2 2+ Cells	0		Tumor: % Stain 2 2+ Cells	0
		Tumor: % Stain 2 3+ Cells	0		Tumor: % Stain 2 3+ Cells	0		Tumor: % Stain 2 3+ Cells	0		Tumor: % Stain 2 3+ Cells	0		Tumor: % Stain 2 3+ Cells	0		Tumor: % Stain 2 3+ Cells	0		Tumor: % Stain 2 3+ Cells	0		Tumor: % Stain 2 3+ Cells	0
		Tumor: Stain 2 H-Score	0		Tumor: Stain 2 H-Score	0		Tumor: Stain 2 H-Score	0		Tumor: Stain 2 H-Score	0		Tumor: Stain 2 H-Score	0		Tumor: Stain 2 H-Score	0		Tumor: Stain 2 H-Score	0		Tumor: Stain 2 H-Score	0
		Tumor: % Dual Positive Cells	0		Tumor: % Dual Positive Cells	0		Tumor: % Dual Positive Cells	0		Tumor: % Dual Positive Cells	0		Tumor: % Dual Positive Cells	0		Tumor: % Dual Positive Cells	0		Tumor: % Dual Positive Cells	0		Tumor: % Dual Positive Cells	0
		Tumor: % Dual Negative Cells	99.024		Tumor: % Dual Negative Cells	99.5956		Tumor: % Dual Negative Cells	99.361		Tumor: % Dual Negative Cells	99.5185		Tumor: % Dual Negative Cells	99.5772		Tumor: % Dual Negative Cells	99.185		Tumor: % Dual Negative Cells	99.3267		Tumor: % Dual Negative Cells	99.7714
		Tumor: Avg Stain 1 Nuclear OD	0.0320655		Tumor: Avg Stain 1 Nuclear OD	0.0292678		Tumor: Avg Stain 1 Nuclear OD	0.0306932		Tumor: Avg Stain 1 Nuclear OD	0.0300478		Tumor: Avg Stain 1 Nuclear OD	0.0303266		Tumor: Avg Stain 1 Nuclear OD	0.0323355		Tumor: Avg Stain 1 Nuclear OD	0.0310881		Tumor: Avg Stain 1 Nuclear OD	0.0281705
		Tumor: Avg Stain 2 Nuclear OD	0.0374401		Tumor: Avg Stain 2 Nuclear OD	0.0374782		Tumor: Avg Stain 2 Nuclear OD	0.0375186		Tumor: Avg Stain 2 Nuclear OD	0.0371916		Tumor: Avg Stain 2 Nuclear OD	0.0378303		Tumor: Avg Stain 2 Nuclear OD	0.0368327		Tumor: Avg Stain 2 Nuclear OD	0.0374688		Tumor: Avg Stain 2 Nuclear OD	0.0378473
		Tumor: Avg Stain 1 Cytoplasmic OD	0.0291281		Tumor: Avg Stain 1 Cytoplasmic OD	0.0284152		Tumor: Avg Stain 1 Cytoplasmic OD	0.0287621		Tumor: Avg Stain 1 Cytoplasmic OD	0.0287493		Tumor: Avg Stain 1 Cytoplasmic OD	0.0287795		Tumor: Avg Stain 1 Cytoplasmic OD	0.0307143		Tumor: Avg Stain 1 Cytoplasmic OD	0.0294351		Tumor: Avg Stain 1 Cytoplasmic OD	0.0285138
		Tumor: Avg Stain 2 Cytoplasmic OD	0.0326422		Tumor: Avg Stain 2 Cytoplasmic OD	0.0326537		Tumor: Avg Stain 2 Cytoplasmic OD	0.0327803		Tumor: Avg Stain 2 Cytoplasmic OD	0.0324333		Tumor: Avg Stain 2 Cytoplasmic OD	0.0329149		Tumor: Avg Stain 2 Cytoplasmic OD	0.0318383		Tumor: Avg Stain 2 Cytoplasmic OD	0.0323054		Tumor: Avg Stain 2 Cytoplasmic OD	0.0325602
		Tumor: Avg Cell Area (µm²)	92.948		Tumor: Avg Cell Area (µm²)	95.076		Tumor: Avg Cell Area (µm²)	97.3312		Tumor: Avg Cell Area (µm²)	100.323		Tumor: Avg Cell Area (µm²)	85.8218		Tumor: Avg Cell Area (µm²)	89.2704		Tumor: Avg Cell Area (µm²)	90.0437		Tumor: Avg Cell Area (µm²)	86.3551
		Tumor: Avg Cytoplasm Area (µm²)	62.4758		Tumor: Avg Cytoplasm Area (µm²)	63.9638		Tumor: Avg Cytoplasm Area (µm²)	65.071		Tumor: Avg Cytoplasm Area (µm²)	66.2489		Tumor: Avg Cytoplasm Area (µm²)	57.5856		Tumor: Avg Cytoplasm Area (µm²)	57.9244		Tumor: Avg Cytoplasm Area (µm²)	59.4755		Tumor: Avg Cytoplasm Area (µm²)	56.0709
		Tumor: Avg Nucleus Area (µm²)	30.4722		Tumor: Avg Nucleus Area (µm²)	31.1122		Tumor: Avg Nucleus Area (µm²)	32.2602		Tumor: Avg Nucleus Area (µm²)	34.0746		Tumor: Avg Nucleus Area (µm²)	28.2362		Tumor: Avg Nucleus Area (µm²)	31.346		Tumor: Avg Nucleus Area (µm²)	30.5682		Tumor: Avg Nucleus Area (µm²)	30.2841
		Tumor: Avg Nucleus Perimeter (µm)	12.0577		Tumor: Avg Nucleus Perimeter (µm)	12.2662		Tumor: Avg Nucleus Perimeter (µm)	12.7277		Tumor: Avg Nucleus Perimeter (µm)	13.4626		Tumor: Avg Nucleus Perimeter (µm)	11.1979		Tumor: Avg Nucleus Perimeter (µm)	12.3736		Tumor: Avg Nucleus Perimeter (µm)	12.0738		Tumor: Avg Nucleus Perimeter (µm)	11.9793
		Tumor: Avg Nucleus Roundness	0.675269		Tumor: Avg Nucleus Roundness	0.674516		Tumor: Avg Nucleus Roundness	0.673494		Tumor: Avg Nucleus Roundness	0.680113		Tumor: Avg Nucleus Roundness	0.672982		Tumor: Avg Nucleus Roundness	0.670666		Tumor: Avg Nucleus Roundness	0.672051		Tumor: Avg Nucleus Roundness	0.66276
		Tumor: Tissue Area (µm²)	483051		Tumor: Tissue Area (µm²)	505765		Tumor: Tissue Area (µm²)	461469		Tumor: Tissue Area (µm²)	391898		Tumor: Tissue Area (µm²)	299461		Tumor: Tissue Area (µm²)	474088		Tumor: Tissue Area (µm²)	638721		Tumor: Tissue Area (µm²)	352423
		BSNA34.2c	WT
		Name	Value		Name	Value		Name	Value		Name	Value		Name	Value		Name	Value		Name	Value		Name	Value
		Classified Area (mm²)	0.43456		Classified Area (mm²)	0.43481		Classified Area (mm²)	0.56074		Classified Area (mm²)	0.41966		Classified Area (mm²)	0.53478		Classified Area (mm²)	0.46828		Classified Area (mm²)	0.52145		Classified Area (mm²)	0.66041
		Tumor Area (mm²)	0.4238		Tumor Area (mm²)	0.40278		Tumor Area (mm²)	0.54181		Tumor Area (mm²)	0.39967		Tumor Area (mm²)	0.51898		Tumor Area (mm²)	0.4631		Tumor Area (mm²)	0.50782		Tumor Area (mm²)	0.65862
		Necrosis Area (mm²)	0		Necrosis Area (mm²)	0		Necrosis Area (mm²)	0		Necrosis Area (mm²)	0		Necrosis Area (mm²)	0.005		Necrosis Area (mm²)	0		Necrosis Area (mm²)	6e-05		Necrosis Area (mm²)	0
		Empty Area (mm²)	0		Empty Area (mm²)	0.00206		Empty Area (mm²)	0		Empty Area (mm²)	0		Empty Area (mm²)	0.00485		Empty Area (mm²)	0.00088		Empty Area (mm²)	0		Empty Area (mm²)	0.0001
		Normal Area (mm²)	0.01077		Normal Area (mm²)	0.02997		Normal Area (mm²)	0.01893		Normal Area (mm²)	0.01999		Normal Area (mm²)	0.00595		Normal Area (mm²)	0.0043		Normal Area (mm²)	0.01357		Normal Area (mm²)	0.00169
		Total Cells	2757		Total Cells	2475		Total Cells	3543		Total Cells	2636		Total Cells	3237		Total Cells	2672		Total Cells	3114		Total Cells	3581
		Stain 1 Positive Cells	15		Stain 1 Positive Cells	17		Stain 1 Positive Cells	44		Stain 1 Positive Cells	11		Stain 1 Positive Cells	13		Stain 1 Positive Cells	27		Stain 1 Positive Cells	31		Stain 1 Positive Cells	31
		Stain 1 0+ Cells	2742		Stain 1 0+ Cells	2458		Stain 1 0+ Cells	3499		Stain 1 0+ Cells	2625		Stain 1 0+ Cells	3224		Stain 1 0+ Cells	2645		Stain 1 0+ Cells	3083		Stain 1 0+ Cells	3550
		Stain 1 1+ Cells	9		Stain 1 1+ Cells	7		Stain 1 1+ Cells	15		Stain 1 1+ Cells	3		Stain 1 1+ Cells	5		Stain 1 1+ Cells	8		Stain 1 1+ Cells	11		Stain 1 1+ Cells	11
		Stain 1 2+ Cells	5		Stain 1 2+ Cells	6		Stain 1 2+ Cells	12		Stain 1 2+ Cells	2		Stain 1 2+ Cells	5		Stain 1 2+ Cells	4		Stain 1 2+ Cells	5		Stain 1 2+ Cells	10
		Stain 1 3+ Cells	1		Stain 1 3+ Cells	4		Stain 1 3+ Cells	17		Stain 1 3+ Cells	6		Stain 1 3+ Cells	3		Stain 1 3+ Cells	15		Stain 1 3+ Cells	15		Stain 1 3+ Cells	10
		Stain 2 Positive Cells	0		Stain 2 Positive Cells	0		Stain 2 Positive Cells	0		Stain 2 Positive Cells	0		Stain 2 Positive Cells	0		Stain 2 Positive Cells	0		Stain 2 Positive Cells	0		Stain 2 Positive Cells	0
		Stain 2 0+ Cells	2757		Stain 2 0+ Cells	2475		Stain 2 0+ Cells	3543		Stain 2 0+ Cells	2636		Stain 2 0+ Cells	3237		Stain 2 0+ Cells	2672		Stain 2 0+ Cells	3114		Stain 2 0+ Cells	3581
		Stain 2 1+ Cells	0		Stain 2 1+ Cells	0		Stain 2 1+ Cells	0		Stain 2 1+ Cells	0		Stain 2 1+ Cells	0		Stain 2 1+ Cells	0		Stain 2 1+ Cells	0		Stain 2 1+ Cells	0
		Stain 2 2+ Cells	0		Stain 2 2+ Cells	0		Stain 2 2+ Cells	0		Stain 2 2+ Cells	0		Stain 2 2+ Cells	0		Stain 2 2+ Cells	0		Stain 2 2+ Cells	0		Stain 2 2+ Cells	0
		Stain 2 3+ Cells	0		Stain 2 3+ Cells	0		Stain 2 3+ Cells	0		Stain 2 3+ Cells	0		Stain 2 3+ Cells	0		Stain 2 3+ Cells	0		Stain 2 3+ Cells	0		Stain 2 3+ Cells	0
		Dual Positive Cells	0		Dual Positive Cells	0		Dual Positive Cells	0		Dual Positive Cells	0		Dual Positive Cells	0		Dual Positive Cells	0		Dual Positive Cells	0		Dual Positive Cells	0
		Dual Negative Cells	2742		Dual Negative Cells	2458		Dual Negative Cells	3499		Dual Negative Cells	2625		Dual Negative Cells	3224		Dual Negative Cells	2645		Dual Negative Cells	3083		Dual Negative Cells	3550
		% Stain 1 Positive Cells	0.54407		% Stain 1 Positive Cells	0.686869		% Stain 1 Positive Cells	1.24189		% Stain 1 Positive Cells	0.417299		% Stain 1 Positive Cells	0.401606		% Stain 1 Positive Cells	1.01048		% Stain 1 Positive Cells	0.995504		% Stain 1 Positive Cells	0.86568
		% Stain 1 0+ Cells	99.4559		% Stain 1 0+ Cells	99.3131		% Stain 1 0+ Cells	98.7581		% Stain 1 0+ Cells	99.5827		% Stain 1 0+ Cells	99.5984		% Stain 1 0+ Cells	98.9895		% Stain 1 0+ Cells	99.0045		% Stain 1 0+ Cells	99.1343
		% Stain 1 1+ Cells	0.326442		% Stain 1 1+ Cells	0.282828		% Stain 1 1+ Cells	0.42337		% Stain 1 1+ Cells	0.113809		% Stain 1 1+ Cells	0.154464		% Stain 1 1+ Cells	0.299401		% Stain 1 1+ Cells	0.353243		% Stain 1 1+ Cells	0.307177
		% Stain 1 2+ Cells	0.181357		% Stain 1 2+ Cells	0.242424		% Stain 1 2+ Cells	0.338696		% Stain 1 2+ Cells	0.0758725		% Stain 1 2+ Cells	0.154464		% Stain 1 2+ Cells	0.149701		% Stain 1 2+ Cells	0.160565		% Stain 1 2+ Cells	0.279252
		% Stain 1 3+ Cells	0.0362713		% Stain 1 3+ Cells	0.161616		% Stain 1 3+ Cells	0.479819		% Stain 1 3+ Cells	0.227618		% Stain 1 3+ Cells	0.0926784		% Stain 1 3+ Cells	0.561377		% Stain 1 3+ Cells	0.481696		% Stain 1 3+ Cells	0.279252
		Stain 1 H-Score	0.797969		Stain 1 H-Score	1.25253		Stain 1 H-Score	2.54022		Stain 1 H-Score	0.948407		Stain 1 H-Score	0.741427		Stain 1 H-Score	2.28293		Stain 1 H-Score	2.11946		Stain 1 H-Score	1.70343
		% Stain 2 Positive Cells	0		% Stain 2 Positive Cells	0		% Stain 2 Positive Cells	0		% Stain 2 Positive Cells	0		% Stain 2 Positive Cells	0		% Stain 2 Positive Cells	0		% Stain 2 Positive Cells	0		% Stain 2 Positive Cells	0
		% Stain 2 0+ Cells	100		% Stain 2 0+ Cells	100		% Stain 2 0+ Cells	100		% Stain 2 0+ Cells	100		% Stain 2 0+ Cells	100		% Stain 2 0+ Cells	100		% Stain 2 0+ Cells	100		% Stain 2 0+ Cells	100
		% Stain 2 1+ Cells	0		% Stain 2 1+ Cells	0		% Stain 2 1+ Cells	0		% Stain 2 1+ Cells	0		% Stain 2 1+ Cells	0		% Stain 2 1+ Cells	0		% Stain 2 1+ Cells	0		% Stain 2 1+ Cells	0
		% Stain 2 2+ Cells	0		% Stain 2 2+ Cells	0		% Stain 2 2+ Cells	0		% Stain 2 2+ Cells	0		% Stain 2 2+ Cells	0		% Stain 2 2+ Cells	0		% Stain 2 2+ Cells	0		% Stain 2 2+ Cells	0
		% Stain 2 3+ Cells	0		% Stain 2 3+ Cells	0		% Stain 2 3+ Cells	0		% Stain 2 3+ Cells	0		% Stain 2 3+ Cells	0		% Stain 2 3+ Cells	0		% Stain 2 3+ Cells	0		% Stain 2 3+ Cells	0
		Stain 2 H-Score	0		Stain 2 H-Score	0		Stain 2 H-Score	0		Stain 2 H-Score	0		Stain 2 H-Score	0		Stain 2 H-Score	0		Stain 2 H-Score	0		Stain 2 H-Score	0
		% Dual Positive Cells	0		% Dual Positive Cells	0		% Dual Positive Cells	0		% Dual Positive Cells	0		% Dual Positive Cells	0		% Dual Positive Cells	0		% Dual Positive Cells	0		% Dual Positive Cells	0
		% Dual Negative Cells	99.4559		% Dual Negative Cells	99.3131		% Dual Negative Cells	98.7581		% Dual Negative Cells	99.5827		% Dual Negative Cells	99.5984		% Dual Negative Cells	98.9895		% Dual Negative Cells	99.0045		% Dual Negative Cells	99.1343
		Avg Stain 1 Nuclear OD	0.0307615		Avg Stain 1 Nuclear OD	0.0322882		Avg Stain 1 Nuclear OD	0.0364346		Avg Stain 1 Nuclear OD	0.0308378		Avg Stain 1 Nuclear OD	0.0315996		Avg Stain 1 Nuclear OD	0.0350203		Avg Stain 1 Nuclear OD	0.0341326		Avg Stain 1 Nuclear OD	0.0340374
		Avg Stain 2 Nuclear OD	0.0359979		Avg Stain 2 Nuclear OD	0.0355749		Avg Stain 2 Nuclear OD	0.0341208		Avg Stain 2 Nuclear OD	0.0348731		Avg Stain 2 Nuclear OD	0.0349407		Avg Stain 2 Nuclear OD	0.0345764		Avg Stain 2 Nuclear OD	0.0351902		Avg Stain 2 Nuclear OD	0.0348171
		Avg Stain 1 Cytoplasmic OD	0.0298364		Avg Stain 1 Cytoplasmic OD	0.0302753		Avg Stain 1 Cytoplasmic OD	0.032478		Avg Stain 1 Cytoplasmic OD	0.0301784		Avg Stain 1 Cytoplasmic OD	0.0306067		Avg Stain 1 Cytoplasmic OD	0.0313953		Avg Stain 1 Cytoplasmic OD	0.0308571		Avg Stain 1 Cytoplasmic OD	0.0311615
		Avg Stain 2 Cytoplasmic OD	0.0317961		Avg Stain 2 Cytoplasmic OD	0.0316391		Avg Stain 2 Cytoplasmic OD	0.0308709		Avg Stain 2 Cytoplasmic OD	0.0312948		Avg Stain 2 Cytoplasmic OD	0.0312201		Avg Stain 2 Cytoplasmic OD	0.0310238		Avg Stain 2 Cytoplasmic OD	0.0313446		Avg Stain 2 Cytoplasmic OD	0.031122
		Avg Cell Area (µm²)	80.9454		Avg Cell Area (µm²)	87.03		Avg Cell Area (µm²)	81.9119		Avg Cell Area (µm²)	80.7882		Avg Cell Area (µm²)	78.0072		Avg Cell Area (µm²)	85.9208		Avg Cell Area (µm²)	84.832		Avg Cell Area (µm²)	86.536
		Avg Cytoplasm Area (µm²)	52.7446		Avg Cytoplasm Area (µm²)	57.1213		Avg Cytoplasm Area (µm²)	53.0851		Avg Cytoplasm Area (µm²)	52.6006		Avg Cytoplasm Area (µm²)	51.018		Avg Cytoplasm Area (µm²)	57.836		Avg Cytoplasm Area (µm²)	56.1795		Avg Cytoplasm Area (µm²)	57.9974
		Avg Nucleus Area (µm²)	28.2008		Avg Nucleus Area (µm²)	29.9087		Avg Nucleus Area (µm²)	28.8268		Avg Nucleus Area (µm²)	28.1876		Avg Nucleus Area (µm²)	26.9892		Avg Nucleus Area (µm²)	28.0848		Avg Nucleus Area (µm²)	28.6524		Avg Nucleus Area (µm²)	28.5386
		Avg Nucleus Perimeter (µm)	11.1994		Avg Nucleus Perimeter (µm)	11.8698		Avg Nucleus Perimeter (µm)	11.4286		Avg Nucleus Perimeter (µm)	11.1753		Avg Nucleus Perimeter (µm)	10.7243		Avg Nucleus Perimeter (µm)	11.1321		Avg Nucleus Perimeter (µm)	11.3668		Avg Nucleus Perimeter (µm)	11.3326
		Avg Nucleus Roundness	0.681713		Avg Nucleus Roundness	0.681461		Avg Nucleus Roundness	0.682886		Avg Nucleus Roundness	0.678612		Avg Nucleus Roundness	0.680735		Avg Nucleus Roundness	0.68458		Avg Nucleus Roundness	0.679382		Avg Nucleus Roundness	0.687631
		Tissue Area (µm²)	423208		Tissue Area (µm²)	407718		Tissue Area (µm²)	546917		Tissue Area (µm²)	398951		Tissue Area (µm²)	488972		Tissue Area (µm²)	432930		Tissue Area (µm²)	496492		Tissue Area (µm²)	575172
		Tumor: Total Cells	2757		Tumor: Total Cells	2475		Tumor: Total Cells	3543		Tumor: Total Cells	2636		Tumor: Total Cells	3237		Tumor: Total Cells	2672		Tumor: Total Cells	3114		Tumor: Total Cells	3581
		Tumor: Stain 1 Positive Cells	15		Tumor: Stain 1 Positive Cells	17		Tumor: Stain 1 Positive Cells	44		Tumor: Stain 1 Positive Cells	11		Tumor: Stain 1 Positive Cells	13		Tumor: Stain 1 Positive Cells	27		Tumor: Stain 1 Positive Cells	31		Tumor: Stain 1 Positive Cells	31
		Tumor: Stain 1 0+ Cells	2742		Tumor: Stain 1 0+ Cells	2458		Tumor: Stain 1 0+ Cells	3499		Tumor: Stain 1 0+ Cells	2625		Tumor: Stain 1 0+ Cells	3224		Tumor: Stain 1 0+ Cells	2645		Tumor: Stain 1 0+ Cells	3083		Tumor: Stain 1 0+ Cells	3550
		Tumor: Stain 1 1+ Cells	9		Tumor: Stain 1 1+ Cells	7		Tumor: Stain 1 1+ Cells	15		Tumor: Stain 1 1+ Cells	3		Tumor: Stain 1 1+ Cells	5		Tumor: Stain 1 1+ Cells	8		Tumor: Stain 1 1+ Cells	11		Tumor: Stain 1 1+ Cells	11
		Tumor: Stain 1 2+ Cells	5		Tumor: Stain 1 2+ Cells	6		Tumor: Stain 1 2+ Cells	12		Tumor: Stain 1 2+ Cells	2		Tumor: Stain 1 2+ Cells	5		Tumor: Stain 1 2+ Cells	4		Tumor: Stain 1 2+ Cells	5		Tumor: Stain 1 2+ Cells	10
		Tumor: Stain 1 3+ Cells	1		Tumor: Stain 1 3+ Cells	4		Tumor: Stain 1 3+ Cells	17		Tumor: Stain 1 3+ Cells	6		Tumor: Stain 1 3+ Cells	3		Tumor: Stain 1 3+ Cells	15		Tumor: Stain 1 3+ Cells	15		Tumor: Stain 1 3+ Cells	10
		Tumor: Stain 2 Positive Cells	0		Tumor: Stain 2 Positive Cells	0		Tumor: Stain 2 Positive Cells	0		Tumor: Stain 2 Positive Cells	0		Tumor: Stain 2 Positive Cells	0		Tumor: Stain 2 Positive Cells	0		Tumor: Stain 2 Positive Cells	0		Tumor: Stain 2 Positive Cells	0
		Tumor: Stain 2 0+ Cells	2757		Tumor: Stain 2 0+ Cells	2475		Tumor: Stain 2 0+ Cells	3543		Tumor: Stain 2 0+ Cells	2636		Tumor: Stain 2 0+ Cells	3237		Tumor: Stain 2 0+ Cells	2672		Tumor: Stain 2 0+ Cells	3114		Tumor: Stain 2 0+ Cells	3581
		Tumor: Stain 2 1+ Cells	0		Tumor: Stain 2 1+ Cells	0		Tumor: Stain 2 1+ Cells	0		Tumor: Stain 2 1+ Cells	0		Tumor: Stain 2 1+ Cells	0		Tumor: Stain 2 1+ Cells	0		Tumor: Stain 2 1+ Cells	0		Tumor: Stain 2 1+ Cells	0
		Tumor: Stain 2 2+ Cells	0		Tumor: Stain 2 2+ Cells	0		Tumor: Stain 2 2+ Cells	0		Tumor: Stain 2 2+ Cells	0		Tumor: Stain 2 2+ Cells	0		Tumor: Stain 2 2+ Cells	0		Tumor: Stain 2 2+ Cells	0		Tumor: Stain 2 2+ Cells	0
		Tumor: Stain 2 3+ Cells	0		Tumor: Stain 2 3+ Cells	0		Tumor: Stain 2 3+ Cells	0		Tumor: Stain 2 3+ Cells	0		Tumor: Stain 2 3+ Cells	0		Tumor: Stain 2 3+ Cells	0		Tumor: Stain 2 3+ Cells	0		Tumor: Stain 2 3+ Cells	0
		Tumor: Dual Positive Cells	0		Tumor: Dual Positive Cells	0		Tumor: Dual Positive Cells	0		Tumor: Dual Positive Cells	0		Tumor: Dual Positive Cells	0		Tumor: Dual Positive Cells	0		Tumor: Dual Positive Cells	0		Tumor: Dual Positive Cells	0
		Tumor: Dual Negative Cells	2742		Tumor: Dual Negative Cells	2458		Tumor: Dual Negative Cells	3499		Tumor: Dual Negative Cells	2625		Tumor: Dual Negative Cells	3224		Tumor: Dual Negative Cells	2645		Tumor: Dual Negative Cells	3083		Tumor: Dual Negative Cells	3550
		Tumor: % Stain 1 Positive Cells	0.54407		Tumor: % Stain 1 Positive Cells	0.686869		Tumor: % Stain 1 Positive Cells	1.24189		Tumor: % Stain 1 Positive Cells	0.417299		Tumor: % Stain 1 Positive Cells	0.401606		Tumor: % Stain 1 Positive Cells	1.01048		Tumor: % Stain 1 Positive Cells	0.995504		Tumor: % Stain 1 Positive Cells	0.86568		0.770425
		Tumor: % Stain 1 0+ Cells	99.4559		Tumor: % Stain 1 0+ Cells	99.3131		Tumor: % Stain 1 0+ Cells	98.7581		Tumor: % Stain 1 0+ Cells	99.5827		Tumor: % Stain 1 0+ Cells	99.5984		Tumor: % Stain 1 0+ Cells	98.9895		Tumor: % Stain 1 0+ Cells	99.0045		Tumor: % Stain 1 0+ Cells	99.1343
		Tumor: % Stain 1 1+ Cells	0.326442		Tumor: % Stain 1 1+ Cells	0.282828		Tumor: % Stain 1 1+ Cells	0.42337		Tumor: % Stain 1 1+ Cells	0.113809		Tumor: % Stain 1 1+ Cells	0.154464		Tumor: % Stain 1 1+ Cells	0.299401		Tumor: % Stain 1 1+ Cells	0.353243		Tumor: % Stain 1 1+ Cells	0.307177
		Tumor: % Stain 1 2+ Cells	0.181357		Tumor: % Stain 1 2+ Cells	0.242424		Tumor: % Stain 1 2+ Cells	0.338696		Tumor: % Stain 1 2+ Cells	0.0758725		Tumor: % Stain 1 2+ Cells	0.154464		Tumor: % Stain 1 2+ Cells	0.149701		Tumor: % Stain 1 2+ Cells	0.160565		Tumor: % Stain 1 2+ Cells	0.279252
		Tumor: % Stain 1 3+ Cells	0.0362713		Tumor: % Stain 1 3+ Cells	0.161616		Tumor: % Stain 1 3+ Cells	0.479819		Tumor: % Stain 1 3+ Cells	0.227618		Tumor: % Stain 1 3+ Cells	0.0926784		Tumor: % Stain 1 3+ Cells	0.561377		Tumor: % Stain 1 3+ Cells	0.481696		Tumor: % Stain 1 3+ Cells	0.279252
		Tumor: Stain 1 H-Score	0.797969		Tumor: Stain 1 H-Score	1.25253		Tumor: Stain 1 H-Score	2.54022		Tumor: Stain 1 H-Score	0.948407		Tumor: Stain 1 H-Score	0.741427		Tumor: Stain 1 H-Score	2.28293		Tumor: Stain 1 H-Score	2.11946		Tumor: Stain 1 H-Score	1.70343
		Tumor: % Stain 2 Positive Cells	0		Tumor: % Stain 2 Positive Cells	0		Tumor: % Stain 2 Positive Cells	0		Tumor: % Stain 2 Positive Cells	0		Tumor: % Stain 2 Positive Cells	0		Tumor: % Stain 2 Positive Cells	0		Tumor: % Stain 2 Positive Cells	0		Tumor: % Stain 2 Positive Cells	0
		Tumor: % Stain 2 0+ Cells	100		Tumor: % Stain 2 0+ Cells	100		Tumor: % Stain 2 0+ Cells	100		Tumor: % Stain 2 0+ Cells	100		Tumor: % Stain 2 0+ Cells	100		Tumor: % Stain 2 0+ Cells	100		Tumor: % Stain 2 0+ Cells	100		Tumor: % Stain 2 0+ Cells	100
		Tumor: % Stain 2 1+ Cells	0		Tumor: % Stain 2 1+ Cells	0		Tumor: % Stain 2 1+ Cells	0		Tumor: % Stain 2 1+ Cells	0		Tumor: % Stain 2 1+ Cells	0		Tumor: % Stain 2 1+ Cells	0		Tumor: % Stain 2 1+ Cells	0		Tumor: % Stain 2 1+ Cells	0
		Tumor: % Stain 2 2+ Cells	0		Tumor: % Stain 2 2+ Cells	0		Tumor: % Stain 2 2+ Cells	0		Tumor: % Stain 2 2+ Cells	0		Tumor: % Stain 2 2+ Cells	0		Tumor: % Stain 2 2+ Cells	0		Tumor: % Stain 2 2+ Cells	0		Tumor: % Stain 2 2+ Cells	0
		Tumor: % Stain 2 3+ Cells	0		Tumor: % Stain 2 3+ Cells	0		Tumor: % Stain 2 3+ Cells	0		Tumor: % Stain 2 3+ Cells	0		Tumor: % Stain 2 3+ Cells	0		Tumor: % Stain 2 3+ Cells	0		Tumor: % Stain 2 3+ Cells	0		Tumor: % Stain 2 3+ Cells	0
		Tumor: Stain 2 H-Score	0		Tumor: Stain 2 H-Score	0		Tumor: Stain 2 H-Score	0		Tumor: Stain 2 H-Score	0		Tumor: Stain 2 H-Score	0		Tumor: Stain 2 H-Score	0		Tumor: Stain 2 H-Score	0		Tumor: Stain 2 H-Score	0
		Tumor: % Dual Positive Cells	0		Tumor: % Dual Positive Cells	0		Tumor: % Dual Positive Cells	0		Tumor: % Dual Positive Cells	0		Tumor: % Dual Positive Cells	0		Tumor: % Dual Positive Cells	0		Tumor: % Dual Positive Cells	0		Tumor: % Dual Positive Cells	0
		Tumor: % Dual Negative Cells	99.4559		Tumor: % Dual Negative Cells	99.3131		Tumor: % Dual Negative Cells	98.7581		Tumor: % Dual Negative Cells	99.5827		Tumor: % Dual Negative Cells	99.5984		Tumor: % Dual Negative Cells	98.9895		Tumor: % Dual Negative Cells	99.0045		Tumor: % Dual Negative Cells	99.1343
		Tumor: Avg Stain 1 Nuclear OD	0.0307615		Tumor: Avg Stain 1 Nuclear OD	0.0322882		Tumor: Avg Stain 1 Nuclear OD	0.0364346		Tumor: Avg Stain 1 Nuclear OD	0.0308378		Tumor: Avg Stain 1 Nuclear OD	0.0315996		Tumor: Avg Stain 1 Nuclear OD	0.0350203		Tumor: Avg Stain 1 Nuclear OD	0.0341326		Tumor: Avg Stain 1 Nuclear OD	0.0340374
		Tumor: Avg Stain 2 Nuclear OD	0.0359979		Tumor: Avg Stain 2 Nuclear OD	0.0355749		Tumor: Avg Stain 2 Nuclear OD	0.0341208		Tumor: Avg Stain 2 Nuclear OD	0.0348731		Tumor: Avg Stain 2 Nuclear OD	0.0349407		Tumor: Avg Stain 2 Nuclear OD	0.0345764		Tumor: Avg Stain 2 Nuclear OD	0.0351902		Tumor: Avg Stain 2 Nuclear OD	0.0348171
		Tumor: Avg Stain 1 Cytoplasmic OD	0.0298364		Tumor: Avg Stain 1 Cytoplasmic OD	0.0302753		Tumor: Avg Stain 1 Cytoplasmic OD	0.032478		Tumor: Avg Stain 1 Cytoplasmic OD	0.0301784		Tumor: Avg Stain 1 Cytoplasmic OD	0.0306067		Tumor: Avg Stain 1 Cytoplasmic OD	0.0313953		Tumor: Avg Stain 1 Cytoplasmic OD	0.0308571		Tumor: Avg Stain 1 Cytoplasmic OD	0.0311615
		Tumor: Avg Stain 2 Cytoplasmic OD	0.0317961		Tumor: Avg Stain 2 Cytoplasmic OD	0.0316391		Tumor: Avg Stain 2 Cytoplasmic OD	0.0308709		Tumor: Avg Stain 2 Cytoplasmic OD	0.0312948		Tumor: Avg Stain 2 Cytoplasmic OD	0.0312201		Tumor: Avg Stain 2 Cytoplasmic OD	0.0310238		Tumor: Avg Stain 2 Cytoplasmic OD	0.0313446		Tumor: Avg Stain 2 Cytoplasmic OD	0.031122
		Tumor: Avg Cell Area (µm²)	80.9454		Tumor: Avg Cell Area (µm²)	87.03		Tumor: Avg Cell Area (µm²)	81.9119		Tumor: Avg Cell Area (µm²)	80.7882		Tumor: Avg Cell Area (µm²)	78.0072		Tumor: Avg Cell Area (µm²)	85.9208		Tumor: Avg Cell Area (µm²)	84.832		Tumor: Avg Cell Area (µm²)	86.536
		Tumor: Avg Cytoplasm Area (µm²)	52.7446		Tumor: Avg Cytoplasm Area (µm²)	57.1213		Tumor: Avg Cytoplasm Area (µm²)	53.0851		Tumor: Avg Cytoplasm Area (µm²)	52.6006		Tumor: Avg Cytoplasm Area (µm²)	51.018		Tumor: Avg Cytoplasm Area (µm²)	57.836		Tumor: Avg Cytoplasm Area (µm²)	56.1795		Tumor: Avg Cytoplasm Area (µm²)	57.9974
		Tumor: Avg Nucleus Area (µm²)	28.2008		Tumor: Avg Nucleus Area (µm²)	29.9087		Tumor: Avg Nucleus Area (µm²)	28.8268		Tumor: Avg Nucleus Area (µm²)	28.1876		Tumor: Avg Nucleus Area (µm²)	26.9892		Tumor: Avg Nucleus Area (µm²)	28.0848		Tumor: Avg Nucleus Area (µm²)	28.6524		Tumor: Avg Nucleus Area (µm²)	28.5386
		Tumor: Avg Nucleus Perimeter (µm)	11.1994		Tumor: Avg Nucleus Perimeter (µm)	11.8698		Tumor: Avg Nucleus Perimeter (µm)	11.4286		Tumor: Avg Nucleus Perimeter (µm)	11.1753		Tumor: Avg Nucleus Perimeter (µm)	10.7243		Tumor: Avg Nucleus Perimeter (µm)	11.1321		Tumor: Avg Nucleus Perimeter (µm)	11.3668		Tumor: Avg Nucleus Perimeter (µm)	11.3326
		Tumor: Avg Nucleus Roundness	0.681713		Tumor: Avg Nucleus Roundness	0.681461		Tumor: Avg Nucleus Roundness	0.682886		Tumor: Avg Nucleus Roundness	0.678612		Tumor: Avg Nucleus Roundness	0.680735		Tumor: Avg Nucleus Roundness	0.68458		Tumor: Avg Nucleus Roundness	0.679382		Tumor: Avg Nucleus Roundness	0.687631
		Tumor: Tissue Area (µm²)	423208		Tumor: Tissue Area (µm²)	407718		Tumor: Tissue Area (µm²)	546917		Tumor: Tissue Area (µm²)	398951		Tumor: Tissue Area (µm²)	488972		Tumor: Tissue Area (µm²)	432930		Tumor: Tissue Area (µm²)	496492		Tumor: Tissue Area (µm²)	575172
		BSNA43.1c	WT
		Name	Value		Name	Value		Name	Value		Name	Value		Name	Value		Name	Value		Name	Value		Name	Value
		Classified Area (mm²)	0.98074		Classified Area (mm²)	0.64396		Classified Area (mm²)	0.81984		Classified Area (mm²)	0.75665		Classified Area (mm²)	0.60838		Classified Area (mm²)	0.86072		Classified Area (mm²)	1.03722		Classified Area (mm²)	0.96374
		Tumor Area (mm²)	0.95409		Tumor Area (mm²)	0.59952		Tumor Area (mm²)	0.80294		Tumor Area (mm²)	0.73182		Tumor Area (mm²)	0.59538		Tumor Area (mm²)	0.84329		Tumor Area (mm²)	1.01109		Tumor Area (mm²)	0.95638
		Necrosis Area (mm²)	0.00023		Necrosis Area (mm²)	0.00018		Necrosis Area (mm²)	0		Necrosis Area (mm²)	0		Necrosis Area (mm²)	0		Necrosis Area (mm²)	0.00128		Necrosis Area (mm²)	0.00019		Necrosis Area (mm²)	0.00015
		Empty Area (mm²)	0.00455		Empty Area (mm²)	0.03346		Empty Area (mm²)	0.0036		Empty Area (mm²)	0.01269		Empty Area (mm²)	0.00873		Empty Area (mm²)	0.01362		Empty Area (mm²)	0.01613		Empty Area (mm²)	0.00139
		Normal Area (mm²)	0.02186		Normal Area (mm²)	0.01079		Normal Area (mm²)	0.0133		Normal Area (mm²)	0.01214		Normal Area (mm²)	0.00428		Normal Area (mm²)	0.00254		Normal Area (mm²)	0.00981		Normal Area (mm²)	0.00581
		Total Cells	4072		Total Cells	2217		Total Cells	4109		Total Cells	3159		Total Cells	2680		Total Cells	3624		Total Cells	4346		Total Cells	4401
		Stain 1 Positive Cells	46		Stain 1 Positive Cells	61		Stain 1 Positive Cells	74		Stain 1 Positive Cells	68		Stain 1 Positive Cells	27		Stain 1 Positive Cells	66		Stain 1 Positive Cells	40		Stain 1 Positive Cells	135
		Stain 1 0+ Cells	4026		Stain 1 0+ Cells	2156		Stain 1 0+ Cells	4035		Stain 1 0+ Cells	3091		Stain 1 0+ Cells	2653		Stain 1 0+ Cells	3558		Stain 1 0+ Cells	4306		Stain 1 0+ Cells	4266
		Stain 1 1+ Cells	17		Stain 1 1+ Cells	34		Stain 1 1+ Cells	39		Stain 1 1+ Cells	31		Stain 1 1+ Cells	15		Stain 1 1+ Cells	40		Stain 1 1+ Cells	21		Stain 1 1+ Cells	81
		Stain 1 2+ Cells	14		Stain 1 2+ Cells	10		Stain 1 2+ Cells	25		Stain 1 2+ Cells	15		Stain 1 2+ Cells	9		Stain 1 2+ Cells	14		Stain 1 2+ Cells	10		Stain 1 2+ Cells	34
		Stain 1 3+ Cells	15		Stain 1 3+ Cells	17		Stain 1 3+ Cells	10		Stain 1 3+ Cells	22		Stain 1 3+ Cells	3		Stain 1 3+ Cells	12		Stain 1 3+ Cells	9		Stain 1 3+ Cells	20
		Stain 2 Positive Cells	0		Stain 2 Positive Cells	0		Stain 2 Positive Cells	0		Stain 2 Positive Cells	0		Stain 2 Positive Cells	0		Stain 2 Positive Cells	0		Stain 2 Positive Cells	0		Stain 2 Positive Cells	0
		Stain 2 0+ Cells	4072		Stain 2 0+ Cells	2217		Stain 2 0+ Cells	4109		Stain 2 0+ Cells	3159		Stain 2 0+ Cells	2680		Stain 2 0+ Cells	3624		Stain 2 0+ Cells	4346		Stain 2 0+ Cells	4401
		Stain 2 1+ Cells	0		Stain 2 1+ Cells	0		Stain 2 1+ Cells	0		Stain 2 1+ Cells	0		Stain 2 1+ Cells	0		Stain 2 1+ Cells	0		Stain 2 1+ Cells	0		Stain 2 1+ Cells	0
		Stain 2 2+ Cells	0		Stain 2 2+ Cells	0		Stain 2 2+ Cells	0		Stain 2 2+ Cells	0		Stain 2 2+ Cells	0		Stain 2 2+ Cells	0		Stain 2 2+ Cells	0		Stain 2 2+ Cells	0
		Stain 2 3+ Cells	0		Stain 2 3+ Cells	0		Stain 2 3+ Cells	0		Stain 2 3+ Cells	0		Stain 2 3+ Cells	0		Stain 2 3+ Cells	0		Stain 2 3+ Cells	0		Stain 2 3+ Cells	0
		Dual Positive Cells	0		Dual Positive Cells	0		Dual Positive Cells	0		Dual Positive Cells	0		Dual Positive Cells	0		Dual Positive Cells	0		Dual Positive Cells	0		Dual Positive Cells	0
		Dual Negative Cells	4026		Dual Negative Cells	2156		Dual Negative Cells	4035		Dual Negative Cells	3091		Dual Negative Cells	2653		Dual Negative Cells	3558		Dual Negative Cells	4306		Dual Negative Cells	4266
		% Stain 1 Positive Cells	1.12967		% Stain 1 Positive Cells	2.75147		% Stain 1 Positive Cells	1.80092		% Stain 1 Positive Cells	2.15258		% Stain 1 Positive Cells	1.00746		% Stain 1 Positive Cells	1.82119		% Stain 1 Positive Cells	0.920387		% Stain 1 Positive Cells	3.06748
		% Stain 1 0+ Cells	98.8703		% Stain 1 0+ Cells	97.2485		% Stain 1 0+ Cells	98.1991		% Stain 1 0+ Cells	97.8474		% Stain 1 0+ Cells	98.9925		% Stain 1 0+ Cells	98.1788		% Stain 1 0+ Cells	99.0796		% Stain 1 0+ Cells	96.9325
		% Stain 1 1+ Cells	0.417485		% Stain 1 1+ Cells	1.5336		% Stain 1 1+ Cells	0.949136		% Stain 1 1+ Cells	0.981323		% Stain 1 1+ Cells	0.559701		% Stain 1 1+ Cells	1.10375		% Stain 1 1+ Cells	0.483203		% Stain 1 1+ Cells	1.84049
		% Stain 1 2+ Cells	0.343811		% Stain 1 2+ Cells	0.45106		% Stain 1 2+ Cells	0.608421		% Stain 1 2+ Cells	0.474834		% Stain 1 2+ Cells	0.335821		% Stain 1 2+ Cells	0.386313		% Stain 1 2+ Cells	0.230097		% Stain 1 2+ Cells	0.772552
		% Stain 1 3+ Cells	0.368369		% Stain 1 3+ Cells	0.766802		% Stain 1 3+ Cells	0.243368		% Stain 1 3+ Cells	0.696423		% Stain 1 3+ Cells	0.11194		% Stain 1 3+ Cells	0.331126		% Stain 1 3+ Cells	0.207087		% Stain 1 3+ Cells	0.454442
		Stain 1 H-Score	2.21022		Stain 1 H-Score	4.73613		Stain 1 H-Score	2.89608		Stain 1 H-Score	4.02026		Stain 1 H-Score	1.56716		Stain 1 H-Score	2.86976		Stain 1 H-Score	1.56466		Stain 1 H-Score	4.74892
		% Stain 2 Positive Cells	0		% Stain 2 Positive Cells	0		% Stain 2 Positive Cells	0		% Stain 2 Positive Cells	0		% Stain 2 Positive Cells	0		% Stain 2 Positive Cells	0		% Stain 2 Positive Cells	0		% Stain 2 Positive Cells	0
		% Stain 2 0+ Cells	100		% Stain 2 0+ Cells	100		% Stain 2 0+ Cells	100		% Stain 2 0+ Cells	100		% Stain 2 0+ Cells	100		% Stain 2 0+ Cells	100		% Stain 2 0+ Cells	100		% Stain 2 0+ Cells	100
		% Stain 2 1+ Cells	0		% Stain 2 1+ Cells	0		% Stain 2 1+ Cells	0		% Stain 2 1+ Cells	0		% Stain 2 1+ Cells	0		% Stain 2 1+ Cells	0		% Stain 2 1+ Cells	0		% Stain 2 1+ Cells	0
		% Stain 2 2+ Cells	0		% Stain 2 2+ Cells	0		% Stain 2 2+ Cells	0		% Stain 2 2+ Cells	0		% Stain 2 2+ Cells	0		% Stain 2 2+ Cells	0		% Stain 2 2+ Cells	0		% Stain 2 2+ Cells	0
		% Stain 2 3+ Cells	0		% Stain 2 3+ Cells	0		% Stain 2 3+ Cells	0		% Stain 2 3+ Cells	0		% Stain 2 3+ Cells	0		% Stain 2 3+ Cells	0		% Stain 2 3+ Cells	0		% Stain 2 3+ Cells	0
		Stain 2 H-Score	0		Stain 2 H-Score	0		Stain 2 H-Score	0		Stain 2 H-Score	0		Stain 2 H-Score	0		Stain 2 H-Score	0		Stain 2 H-Score	0		Stain 2 H-Score	0
		% Dual Positive Cells	0		% Dual Positive Cells	0		% Dual Positive Cells	0		% Dual Positive Cells	0		% Dual Positive Cells	0		% Dual Positive Cells	0		% Dual Positive Cells	0		% Dual Positive Cells	0
		% Dual Negative Cells	98.8703		% Dual Negative Cells	97.2485		% Dual Negative Cells	98.1991		% Dual Negative Cells	97.8474		% Dual Negative Cells	98.9925		% Dual Negative Cells	98.1788		% Dual Negative Cells	99.0796		% Dual Negative Cells	96.9325
		Avg Stain 1 Nuclear OD	0.0348095		Avg Stain 1 Nuclear OD	0.0444603		Avg Stain 1 Nuclear OD	0.0369492		Avg Stain 1 Nuclear OD	0.0399162		Avg Stain 1 Nuclear OD	0.0330154		Avg Stain 1 Nuclear OD	0.0394719		Avg Stain 1 Nuclear OD	0.0336631		Avg Stain 1 Nuclear OD	0.0453882
		Avg Stain 2 Nuclear OD	0.0373891		Avg Stain 2 Nuclear OD	0.0374413		Avg Stain 2 Nuclear OD	0.0374719		Avg Stain 2 Nuclear OD	0.0370103		Avg Stain 2 Nuclear OD	0.0368169		Avg Stain 2 Nuclear OD	0.0361826		Avg Stain 2 Nuclear OD	0.0361567		Avg Stain 2 Nuclear OD	0.0362195
		Avg Stain 1 Cytoplasmic OD	0.0300755		Avg Stain 1 Cytoplasmic OD	0.0321516		Avg Stain 1 Cytoplasmic OD	0.0304051		Avg Stain 1 Cytoplasmic OD	0.0309537		Avg Stain 1 Cytoplasmic OD	0.0296952		Avg Stain 1 Cytoplasmic OD	0.0312811		Avg Stain 1 Cytoplasmic OD	0.0306479		Avg Stain 1 Cytoplasmic OD	0.0326673
		Avg Stain 2 Cytoplasmic OD	0.0322613		Avg Stain 2 Cytoplasmic OD	0.0322337		Avg Stain 2 Cytoplasmic OD	0.0320877		Avg Stain 2 Cytoplasmic OD	0.0321824		Avg Stain 2 Cytoplasmic OD	0.0322322		Avg Stain 2 Cytoplasmic OD	0.0317997		Avg Stain 2 Cytoplasmic OD	0.0318174		Avg Stain 2 Cytoplasmic OD	0.0315623
		Avg Cell Area (µm²)	101.151		Avg Cell Area (µm²)	93.8399		Avg Cell Area (µm²)	89.1012		Avg Cell Area (µm²)	85.5717		Avg Cell Area (µm²)	81.5506		Avg Cell Area (µm²)	88.3961		Avg Cell Area (µm²)	83.2904		Avg Cell Area (µm²)	90.3684
		Avg Cytoplasm Area (µm²)	66.6743		Avg Cytoplasm Area (µm²)	62.6702		Avg Cytoplasm Area (µm²)	60.0165		Avg Cytoplasm Area (µm²)	57.1273		Avg Cytoplasm Area (µm²)	54.1963		Avg Cytoplasm Area (µm²)	59.5713		Avg Cytoplasm Area (µm²)	55.019		Avg Cytoplasm Area (µm²)	61.5635
		Avg Nucleus Area (µm²)	34.4765		Avg Nucleus Area (µm²)	31.1696		Avg Nucleus Area (µm²)	29.0846		Avg Nucleus Area (µm²)	28.4445		Avg Nucleus Area (µm²)	27.3542		Avg Nucleus Area (µm²)	28.8248		Avg Nucleus Area (µm²)	28.2714		Avg Nucleus Area (µm²)	28.8049
		Avg Nucleus Perimeter (µm)	13.5496		Avg Nucleus Perimeter (µm)	12.2449		Avg Nucleus Perimeter (µm)	11.5265		Avg Nucleus Perimeter (µm)	11.2247		Avg Nucleus Perimeter (µm)	10.8323		Avg Nucleus Perimeter (µm)	11.4188		Avg Nucleus Perimeter (µm)	11.2064		Avg Nucleus Perimeter (µm)	11.3715
		Avg Nucleus Roundness	0.672902		Avg Nucleus Roundness	0.677998		Avg Nucleus Roundness	0.673628		Avg Nucleus Roundness	0.667634		Avg Nucleus Roundness	0.668483		Avg Nucleus Roundness	0.67276		Avg Nucleus Roundness	0.668778		Avg Nucleus Roundness	0.676672
		Tissue Area (µm²)	760501		Tissue Area (µm²)	374428		Tissue Area (µm²)	693694		Tissue Area (µm²)	497137		Tissue Area (µm²)	392613		Tissue Area (µm²)	612200		Tissue Area (µm²)	677577		Tissue Area (µm²)	780008
		Tumor: Total Cells	4072		Tumor: Total Cells	2217		Tumor: Total Cells	4109		Tumor: Total Cells	3159		Tumor: Total Cells	2680		Tumor: Total Cells	3624		Tumor: Total Cells	4346		Tumor: Total Cells	4401
		Tumor: Stain 1 Positive Cells	46		Tumor: Stain 1 Positive Cells	61		Tumor: Stain 1 Positive Cells	74		Tumor: Stain 1 Positive Cells	68		Tumor: Stain 1 Positive Cells	27		Tumor: Stain 1 Positive Cells	66		Tumor: Stain 1 Positive Cells	40		Tumor: Stain 1 Positive Cells	135
		Tumor: Stain 1 0+ Cells	4026		Tumor: Stain 1 0+ Cells	2156		Tumor: Stain 1 0+ Cells	4035		Tumor: Stain 1 0+ Cells	3091		Tumor: Stain 1 0+ Cells	2653		Tumor: Stain 1 0+ Cells	3558		Tumor: Stain 1 0+ Cells	4306		Tumor: Stain 1 0+ Cells	4266
		Tumor: Stain 1 1+ Cells	17		Tumor: Stain 1 1+ Cells	34		Tumor: Stain 1 1+ Cells	39		Tumor: Stain 1 1+ Cells	31		Tumor: Stain 1 1+ Cells	15		Tumor: Stain 1 1+ Cells	40		Tumor: Stain 1 1+ Cells	21		Tumor: Stain 1 1+ Cells	81
		Tumor: Stain 1 2+ Cells	14		Tumor: Stain 1 2+ Cells	10		Tumor: Stain 1 2+ Cells	25		Tumor: Stain 1 2+ Cells	15		Tumor: Stain 1 2+ Cells	9		Tumor: Stain 1 2+ Cells	14		Tumor: Stain 1 2+ Cells	10		Tumor: Stain 1 2+ Cells	34
		Tumor: Stain 1 3+ Cells	15		Tumor: Stain 1 3+ Cells	17		Tumor: Stain 1 3+ Cells	10		Tumor: Stain 1 3+ Cells	22		Tumor: Stain 1 3+ Cells	3		Tumor: Stain 1 3+ Cells	12		Tumor: Stain 1 3+ Cells	9		Tumor: Stain 1 3+ Cells	20
		Tumor: Stain 2 Positive Cells	0		Tumor: Stain 2 Positive Cells	0		Tumor: Stain 2 Positive Cells	0		Tumor: Stain 2 Positive Cells	0		Tumor: Stain 2 Positive Cells	0		Tumor: Stain 2 Positive Cells	0		Tumor: Stain 2 Positive Cells	0		Tumor: Stain 2 Positive Cells	0
		Tumor: Stain 2 0+ Cells	4072		Tumor: Stain 2 0+ Cells	2217		Tumor: Stain 2 0+ Cells	4109		Tumor: Stain 2 0+ Cells	3159		Tumor: Stain 2 0+ Cells	2680		Tumor: Stain 2 0+ Cells	3624		Tumor: Stain 2 0+ Cells	4346		Tumor: Stain 2 0+ Cells	4401
		Tumor: Stain 2 1+ Cells	0		Tumor: Stain 2 1+ Cells	0		Tumor: Stain 2 1+ Cells	0		Tumor: Stain 2 1+ Cells	0		Tumor: Stain 2 1+ Cells	0		Tumor: Stain 2 1+ Cells	0		Tumor: Stain 2 1+ Cells	0		Tumor: Stain 2 1+ Cells	0
		Tumor: Stain 2 2+ Cells	0		Tumor: Stain 2 2+ Cells	0		Tumor: Stain 2 2+ Cells	0		Tumor: Stain 2 2+ Cells	0		Tumor: Stain 2 2+ Cells	0		Tumor: Stain 2 2+ Cells	0		Tumor: Stain 2 2+ Cells	0		Tumor: Stain 2 2+ Cells	0
		Tumor: Stain 2 3+ Cells	0		Tumor: Stain 2 3+ Cells	0		Tumor: Stain 2 3+ Cells	0		Tumor: Stain 2 3+ Cells	0		Tumor: Stain 2 3+ Cells	0		Tumor: Stain 2 3+ Cells	0		Tumor: Stain 2 3+ Cells	0		Tumor: Stain 2 3+ Cells	0
		Tumor: Dual Positive Cells	0		Tumor: Dual Positive Cells	0		Tumor: Dual Positive Cells	0		Tumor: Dual Positive Cells	0		Tumor: Dual Positive Cells	0		Tumor: Dual Positive Cells	0		Tumor: Dual Positive Cells	0		Tumor: Dual Positive Cells	0
		Tumor: Dual Negative Cells	4026		Tumor: Dual Negative Cells	2156		Tumor: Dual Negative Cells	4035		Tumor: Dual Negative Cells	3091		Tumor: Dual Negative Cells	2653		Tumor: Dual Negative Cells	3558		Tumor: Dual Negative Cells	4306		Tumor: Dual Negative Cells	4266
		Tumor: % Stain 1 Positive Cells	1.12967		Tumor: % Stain 1 Positive Cells	2.75147		Tumor: % Stain 1 Positive Cells	1.80092		Tumor: % Stain 1 Positive Cells	2.15258		Tumor: % Stain 1 Positive Cells	1.00746		Tumor: % Stain 1 Positive Cells	1.82119		Tumor: % Stain 1 Positive Cells	0.920387		Tumor: % Stain 1 Positive Cells	3.06748		1.83139
		Tumor: % Stain 1 0+ Cells	98.8703		Tumor: % Stain 1 0+ Cells	97.2485		Tumor: % Stain 1 0+ Cells	98.1991		Tumor: % Stain 1 0+ Cells	97.8474		Tumor: % Stain 1 0+ Cells	98.9925		Tumor: % Stain 1 0+ Cells	98.1788		Tumor: % Stain 1 0+ Cells	99.0796		Tumor: % Stain 1 0+ Cells	96.9325
		Tumor: % Stain 1 1+ Cells	0.417485		Tumor: % Stain 1 1+ Cells	1.5336		Tumor: % Stain 1 1+ Cells	0.949136		Tumor: % Stain 1 1+ Cells	0.981323		Tumor: % Stain 1 1+ Cells	0.559701		Tumor: % Stain 1 1+ Cells	1.10375		Tumor: % Stain 1 1+ Cells	0.483203		Tumor: % Stain 1 1+ Cells	1.84049
		Tumor: % Stain 1 2+ Cells	0.343811		Tumor: % Stain 1 2+ Cells	0.45106		Tumor: % Stain 1 2+ Cells	0.608421		Tumor: % Stain 1 2+ Cells	0.474834		Tumor: % Stain 1 2+ Cells	0.335821		Tumor: % Stain 1 2+ Cells	0.386313		Tumor: % Stain 1 2+ Cells	0.230097		Tumor: % Stain 1 2+ Cells	0.772552
		Tumor: % Stain 1 3+ Cells	0.368369		Tumor: % Stain 1 3+ Cells	0.766802		Tumor: % Stain 1 3+ Cells	0.243368		Tumor: % Stain 1 3+ Cells	0.696423		Tumor: % Stain 1 3+ Cells	0.11194		Tumor: % Stain 1 3+ Cells	0.331126		Tumor: % Stain 1 3+ Cells	0.207087		Tumor: % Stain 1 3+ Cells	0.454442
		Tumor: Stain 1 H-Score	2.21022		Tumor: Stain 1 H-Score	4.73613		Tumor: Stain 1 H-Score	2.89608		Tumor: Stain 1 H-Score	4.02026		Tumor: Stain 1 H-Score	1.56716		Tumor: Stain 1 H-Score	2.86976		Tumor: Stain 1 H-Score	1.56466		Tumor: Stain 1 H-Score	4.74892
		Tumor: % Stain 2 Positive Cells	0		Tumor: % Stain 2 Positive Cells	0		Tumor: % Stain 2 Positive Cells	0		Tumor: % Stain 2 Positive Cells	0		Tumor: % Stain 2 Positive Cells	0		Tumor: % Stain 2 Positive Cells	0		Tumor: % Stain 2 Positive Cells	0		Tumor: % Stain 2 Positive Cells	0
		Tumor: % Stain 2 0+ Cells	100		Tumor: % Stain 2 0+ Cells	100		Tumor: % Stain 2 0+ Cells	100		Tumor: % Stain 2 0+ Cells	100		Tumor: % Stain 2 0+ Cells	100		Tumor: % Stain 2 0+ Cells	100		Tumor: % Stain 2 0+ Cells	100		Tumor: % Stain 2 0+ Cells	100
		Tumor: % Stain 2 1+ Cells	0		Tumor: % Stain 2 1+ Cells	0		Tumor: % Stain 2 1+ Cells	0		Tumor: % Stain 2 1+ Cells	0		Tumor: % Stain 2 1+ Cells	0		Tumor: % Stain 2 1+ Cells	0		Tumor: % Stain 2 1+ Cells	0		Tumor: % Stain 2 1+ Cells	0
		Tumor: % Stain 2 2+ Cells	0		Tumor: % Stain 2 2+ Cells	0		Tumor: % Stain 2 2+ Cells	0		Tumor: % Stain 2 2+ Cells	0		Tumor: % Stain 2 2+ Cells	0		Tumor: % Stain 2 2+ Cells	0		Tumor: % Stain 2 2+ Cells	0		Tumor: % Stain 2 2+ Cells	0
		Tumor: % Stain 2 3+ Cells	0		Tumor: % Stain 2 3+ Cells	0		Tumor: % Stain 2 3+ Cells	0		Tumor: % Stain 2 3+ Cells	0		Tumor: % Stain 2 3+ Cells	0		Tumor: % Stain 2 3+ Cells	0		Tumor: % Stain 2 3+ Cells	0		Tumor: % Stain 2 3+ Cells	0
		Tumor: Stain 2 H-Score	0		Tumor: Stain 2 H-Score	0		Tumor: Stain 2 H-Score	0		Tumor: Stain 2 H-Score	0		Tumor: Stain 2 H-Score	0		Tumor: Stain 2 H-Score	0		Tumor: Stain 2 H-Score	0		Tumor: Stain 2 H-Score	0
		Tumor: % Dual Positive Cells	0		Tumor: % Dual Positive Cells	0		Tumor: % Dual Positive Cells	0		Tumor: % Dual Positive Cells	0		Tumor: % Dual Positive Cells	0		Tumor: % Dual Positive Cells	0		Tumor: % Dual Positive Cells	0		Tumor: % Dual Positive Cells	0
		Tumor: % Dual Negative Cells	98.8703		Tumor: % Dual Negative Cells	97.2485		Tumor: % Dual Negative Cells	98.1991		Tumor: % Dual Negative Cells	97.8474		Tumor: % Dual Negative Cells	98.9925		Tumor: % Dual Negative Cells	98.1788		Tumor: % Dual Negative Cells	99.0796		Tumor: % Dual Negative Cells	96.9325
		Tumor: Avg Stain 1 Nuclear OD	0.0348095		Tumor: Avg Stain 1 Nuclear OD	0.0444603		Tumor: Avg Stain 1 Nuclear OD	0.0369492		Tumor: Avg Stain 1 Nuclear OD	0.0399162		Tumor: Avg Stain 1 Nuclear OD	0.0330154		Tumor: Avg Stain 1 Nuclear OD	0.0394719		Tumor: Avg Stain 1 Nuclear OD	0.0336631		Tumor: Avg Stain 1 Nuclear OD	0.0453882
		Tumor: Avg Stain 2 Nuclear OD	0.0373891		Tumor: Avg Stain 2 Nuclear OD	0.0374413		Tumor: Avg Stain 2 Nuclear OD	0.0374719		Tumor: Avg Stain 2 Nuclear OD	0.0370103		Tumor: Avg Stain 2 Nuclear OD	0.0368169		Tumor: Avg Stain 2 Nuclear OD	0.0361826		Tumor: Avg Stain 2 Nuclear OD	0.0361567		Tumor: Avg Stain 2 Nuclear OD	0.0362195
		Tumor: Avg Stain 1 Cytoplasmic OD	0.0300755		Tumor: Avg Stain 1 Cytoplasmic OD	0.0321516		Tumor: Avg Stain 1 Cytoplasmic OD	0.0304051		Tumor: Avg Stain 1 Cytoplasmic OD	0.0309537		Tumor: Avg Stain 1 Cytoplasmic OD	0.0296952		Tumor: Avg Stain 1 Cytoplasmic OD	0.0312811		Tumor: Avg Stain 1 Cytoplasmic OD	0.0306479		Tumor: Avg Stain 1 Cytoplasmic OD	0.0326673
		Tumor: Avg Stain 2 Cytoplasmic OD	0.0322613		Tumor: Avg Stain 2 Cytoplasmic OD	0.0322337		Tumor: Avg Stain 2 Cytoplasmic OD	0.0320877		Tumor: Avg Stain 2 Cytoplasmic OD	0.0321824		Tumor: Avg Stain 2 Cytoplasmic OD	0.0322322		Tumor: Avg Stain 2 Cytoplasmic OD	0.0317997		Tumor: Avg Stain 2 Cytoplasmic OD	0.0318174		Tumor: Avg Stain 2 Cytoplasmic OD	0.0315623
		Tumor: Avg Cell Area (µm²)	101.151		Tumor: Avg Cell Area (µm²)	93.8399		Tumor: Avg Cell Area (µm²)	89.1012		Tumor: Avg Cell Area (µm²)	85.5717		Tumor: Avg Cell Area (µm²)	81.5506		Tumor: Avg Cell Area (µm²)	88.3961		Tumor: Avg Cell Area (µm²)	83.2904		Tumor: Avg Cell Area (µm²)	90.3684
		Tumor: Avg Cytoplasm Area (µm²)	66.6743		Tumor: Avg Cytoplasm Area (µm²)	62.6702		Tumor: Avg Cytoplasm Area (µm²)	60.0165		Tumor: Avg Cytoplasm Area (µm²)	57.1273		Tumor: Avg Cytoplasm Area (µm²)	54.1963		Tumor: Avg Cytoplasm Area (µm²)	59.5713		Tumor: Avg Cytoplasm Area (µm²)	55.019		Tumor: Avg Cytoplasm Area (µm²)	61.5635
		Tumor: Avg Nucleus Area (µm²)	34.4765		Tumor: Avg Nucleus Area (µm²)	31.1696		Tumor: Avg Nucleus Area (µm²)	29.0846		Tumor: Avg Nucleus Area (µm²)	28.4445		Tumor: Avg Nucleus Area (µm²)	27.3542		Tumor: Avg Nucleus Area (µm²)	28.8248		Tumor: Avg Nucleus Area (µm²)	28.2714		Tumor: Avg Nucleus Area (µm²)	28.8049
		Tumor: Avg Nucleus Perimeter (µm)	13.5496		Tumor: Avg Nucleus Perimeter (µm)	12.2449		Tumor: Avg Nucleus Perimeter (µm)	11.5265		Tumor: Avg Nucleus Perimeter (µm)	11.2247		Tumor: Avg Nucleus Perimeter (µm)	10.8323		Tumor: Avg Nucleus Perimeter (µm)	11.4188		Tumor: Avg Nucleus Perimeter (µm)	11.2064		Tumor: Avg Nucleus Perimeter (µm)	11.3715
		Tumor: Avg Nucleus Roundness	0.672902		Tumor: Avg Nucleus Roundness	0.677998		Tumor: Avg Nucleus Roundness	0.673628		Tumor: Avg Nucleus Roundness	0.667634		Tumor: Avg Nucleus Roundness	0.668483		Tumor: Avg Nucleus Roundness	0.67276		Tumor: Avg Nucleus Roundness	0.668778		Tumor: Avg Nucleus Roundness	0.676672
		Tumor: Tissue Area (µm²)	760501		Tumor: Tissue Area (µm²)	374428		Tumor: Tissue Area (µm²)	693694		Tumor: Tissue Area (µm²)	497137		Tumor: Tissue Area (µm²)	392613		Tumor: Tissue Area (µm²)	612200		Tumor: Tissue Area (µm²)	677577		Tumor: Tissue Area (µm²)	780008
		BSNA41.2d	WT
		Name	Value		Name	Value		Name	Value		Name	Value		Name	Value		Name	Value		Name	Value		Name	Value
		Classified Area (mm²)	0.89227		Classified Area (mm²)	0.73483		Classified Area (mm²)	1.03407		Classified Area (mm²)	0.61369		Classified Area (mm²)	1.05845		Classified Area (mm²)	0.93634		Classified Area (mm²)	0.47742		Classified Area (mm²)	0.5504
		Tumor Area (mm²)	0.81221		Tumor Area (mm²)	0.71079		Tumor Area (mm²)	0.8785		Tumor Area (mm²)	0.57419		Tumor Area (mm²)	1.04558		Tumor Area (mm²)	0.92646		Tumor Area (mm²)	0.47657		Tumor Area (mm²)	0.48293
		Necrosis Area (mm²)	0		Necrosis Area (mm²)	0		Necrosis Area (mm²)	0.00037		Necrosis Area (mm²)	0		Necrosis Area (mm²)	0		Necrosis Area (mm²)	0		Necrosis Area (mm²)	0		Necrosis Area (mm²)	0
		Empty Area (mm²)	0.00937		Empty Area (mm²)	0.00106		Empty Area (mm²)	0.05808		Empty Area (mm²)	0.03932		Empty Area (mm²)	0.00891		Empty Area (mm²)	0		Empty Area (mm²)	0.00045		Empty Area (mm²)	0.0273
		Normal Area (mm²)	0.0707		Normal Area (mm²)	0.02298		Normal Area (mm²)	0.09712		Normal Area (mm²)	0.00018		Normal Area (mm²)	0.00396		Normal Area (mm²)	0.00988		Normal Area (mm²)	0.0004		Normal Area (mm²)	0.04017
		Total Cells	4580		Total Cells	3725		Total Cells	3950		Total Cells	1700		Total Cells	3811		Total Cells	5694		Total Cells	2253		Total Cells	1990
		Stain 1 Positive Cells	46		Stain 1 Positive Cells	53		Stain 1 Positive Cells	133		Stain 1 Positive Cells	15		Stain 1 Positive Cells	45		Stain 1 Positive Cells	69		Stain 1 Positive Cells	13		Stain 1 Positive Cells	40
		Stain 1 0+ Cells	4534		Stain 1 0+ Cells	3672		Stain 1 0+ Cells	3817		Stain 1 0+ Cells	1685		Stain 1 0+ Cells	3766		Stain 1 0+ Cells	5625		Stain 1 0+ Cells	2240		Stain 1 0+ Cells	1950
		Stain 1 1+ Cells	29		Stain 1 1+ Cells	29		Stain 1 1+ Cells	53		Stain 1 1+ Cells	9		Stain 1 1+ Cells	31		Stain 1 1+ Cells	47		Stain 1 1+ Cells	10		Stain 1 1+ Cells	22
		Stain 1 2+ Cells	10		Stain 1 2+ Cells	20		Stain 1 2+ Cells	49		Stain 1 2+ Cells	5		Stain 1 2+ Cells	5		Stain 1 2+ Cells	17		Stain 1 2+ Cells	3		Stain 1 2+ Cells	11
		Stain 1 3+ Cells	7		Stain 1 3+ Cells	4		Stain 1 3+ Cells	31		Stain 1 3+ Cells	1		Stain 1 3+ Cells	9		Stain 1 3+ Cells	5		Stain 1 3+ Cells	0		Stain 1 3+ Cells	7
		Stain 2 Positive Cells	0		Stain 2 Positive Cells	0		Stain 2 Positive Cells	0		Stain 2 Positive Cells	0		Stain 2 Positive Cells	0		Stain 2 Positive Cells	0		Stain 2 Positive Cells	0		Stain 2 Positive Cells	0
		Stain 2 0+ Cells	4580		Stain 2 0+ Cells	3725		Stain 2 0+ Cells	3950		Stain 2 0+ Cells	1700		Stain 2 0+ Cells	3811		Stain 2 0+ Cells	5694		Stain 2 0+ Cells	2253		Stain 2 0+ Cells	1990
		Stain 2 1+ Cells	0		Stain 2 1+ Cells	0		Stain 2 1+ Cells	0		Stain 2 1+ Cells	0		Stain 2 1+ Cells	0		Stain 2 1+ Cells	0		Stain 2 1+ Cells	0		Stain 2 1+ Cells	0
		Stain 2 2+ Cells	0		Stain 2 2+ Cells	0		Stain 2 2+ Cells	0		Stain 2 2+ Cells	0		Stain 2 2+ Cells	0		Stain 2 2+ Cells	0		Stain 2 2+ Cells	0		Stain 2 2+ Cells	0
		Stain 2 3+ Cells	0		Stain 2 3+ Cells	0		Stain 2 3+ Cells	0		Stain 2 3+ Cells	0		Stain 2 3+ Cells	0		Stain 2 3+ Cells	0		Stain 2 3+ Cells	0		Stain 2 3+ Cells	0
		Dual Positive Cells	0		Dual Positive Cells	0		Dual Positive Cells	0		Dual Positive Cells	0		Dual Positive Cells	0		Dual Positive Cells	0		Dual Positive Cells	0		Dual Positive Cells	0
		Dual Negative Cells	4534		Dual Negative Cells	3672		Dual Negative Cells	3817		Dual Negative Cells	1685		Dual Negative Cells	3766		Dual Negative Cells	5625		Dual Negative Cells	2240		Dual Negative Cells	1950
		% Stain 1 Positive Cells	1.00437		% Stain 1 Positive Cells	1.42282		% Stain 1 Positive Cells	3.36709		% Stain 1 Positive Cells	0.882353		% Stain 1 Positive Cells	1.18079		% Stain 1 Positive Cells	1.2118		% Stain 1 Positive Cells	0.577008		% Stain 1 Positive Cells	2.01005
		% Stain 1 0+ Cells	98.9956		% Stain 1 0+ Cells	98.5772		% Stain 1 0+ Cells	96.6329		% Stain 1 0+ Cells	99.1176		% Stain 1 0+ Cells	98.8192		% Stain 1 0+ Cells	98.7882		% Stain 1 0+ Cells	99.423		% Stain 1 0+ Cells	97.9899
		% Stain 1 1+ Cells	0.633188		% Stain 1 1+ Cells	0.778523		% Stain 1 1+ Cells	1.34177		% Stain 1 1+ Cells	0.529412		% Stain 1 1+ Cells	0.813435		% Stain 1 1+ Cells	0.82543		% Stain 1 1+ Cells	0.443853		% Stain 1 1+ Cells	1.10553
		% Stain 1 2+ Cells	0.218341		% Stain 1 2+ Cells	0.536913		% Stain 1 2+ Cells	1.24051		% Stain 1 2+ Cells	0.294118		% Stain 1 2+ Cells	0.131199		% Stain 1 2+ Cells	0.29856		% Stain 1 2+ Cells	0.133156		% Stain 1 2+ Cells	0.552764
		% Stain 1 3+ Cells	0.152838		% Stain 1 3+ Cells	0.107383		% Stain 1 3+ Cells	0.78481		% Stain 1 3+ Cells	0.0588235		% Stain 1 3+ Cells	0.236158		% Stain 1 3+ Cells	0.0878117		% Stain 1 3+ Cells	0		% Stain 1 3+ Cells	0.351759
		Stain 1 H-Score	1.52838		Stain 1 H-Score	2.1745		Stain 1 H-Score	6.17722		Stain 1 H-Score	1.29412		Stain 1 H-Score	1.78431		Stain 1 H-Score	1.68599		Stain 1 H-Score	0.710164		Stain 1 H-Score	3.26633
		% Stain 2 Positive Cells	0		% Stain 2 Positive Cells	0		% Stain 2 Positive Cells	0		% Stain 2 Positive Cells	0		% Stain 2 Positive Cells	0		% Stain 2 Positive Cells	0		% Stain 2 Positive Cells	0		% Stain 2 Positive Cells	0
		% Stain 2 0+ Cells	100		% Stain 2 0+ Cells	100		% Stain 2 0+ Cells	100		% Stain 2 0+ Cells	100		% Stain 2 0+ Cells	100		% Stain 2 0+ Cells	100		% Stain 2 0+ Cells	100		% Stain 2 0+ Cells	100
		% Stain 2 1+ Cells	0		% Stain 2 1+ Cells	0		% Stain 2 1+ Cells	0		% Stain 2 1+ Cells	0		% Stain 2 1+ Cells	0		% Stain 2 1+ Cells	0		% Stain 2 1+ Cells	0		% Stain 2 1+ Cells	0
		% Stain 2 2+ Cells	0		% Stain 2 2+ Cells	0		% Stain 2 2+ Cells	0		% Stain 2 2+ Cells	0		% Stain 2 2+ Cells	0		% Stain 2 2+ Cells	0		% Stain 2 2+ Cells	0		% Stain 2 2+ Cells	0
		% Stain 2 3+ Cells	0		% Stain 2 3+ Cells	0		% Stain 2 3+ Cells	0		% Stain 2 3+ Cells	0		% Stain 2 3+ Cells	0		% Stain 2 3+ Cells	0		% Stain 2 3+ Cells	0		% Stain 2 3+ Cells	0
		Stain 2 H-Score	0		Stain 2 H-Score	0		Stain 2 H-Score	0		Stain 2 H-Score	0		Stain 2 H-Score	0		Stain 2 H-Score	0		Stain 2 H-Score	0		Stain 2 H-Score	0
		% Dual Positive Cells	0		% Dual Positive Cells	0		% Dual Positive Cells	0		% Dual Positive Cells	0		% Dual Positive Cells	0		% Dual Positive Cells	0		% Dual Positive Cells	0		% Dual Positive Cells	0
		% Dual Negative Cells	98.9956		% Dual Negative Cells	98.5772		% Dual Negative Cells	96.6329		% Dual Negative Cells	99.1176		% Dual Negative Cells	98.8192		% Dual Negative Cells	98.7882		% Dual Negative Cells	99.423		% Dual Negative Cells	97.9899
		Avg Stain 1 Nuclear OD	0.0333435		Avg Stain 1 Nuclear OD	0.0368171		Avg Stain 1 Nuclear OD	0.047081		Avg Stain 1 Nuclear OD	0.0340589		Avg Stain 1 Nuclear OD	0.0346615		Avg Stain 1 Nuclear OD	0.0345046		Avg Stain 1 Nuclear OD	0.0311631		Avg Stain 1 Nuclear OD	0.0396147
		Avg Stain 2 Nuclear OD	0.0356202		Avg Stain 2 Nuclear OD	0.0361244		Avg Stain 2 Nuclear OD	0.0358393		Avg Stain 2 Nuclear OD	0.0346546		Avg Stain 2 Nuclear OD	0.0354533		Avg Stain 2 Nuclear OD	0.0360723		Avg Stain 2 Nuclear OD	0.0343819		Avg Stain 2 Nuclear OD	0.035731
		Avg Stain 1 Cytoplasmic OD	0.0302973		Avg Stain 1 Cytoplasmic OD	0.0308358		Avg Stain 1 Cytoplasmic OD	0.033186		Avg Stain 1 Cytoplasmic OD	0.0306501		Avg Stain 1 Cytoplasmic OD	0.0301103		Avg Stain 1 Cytoplasmic OD	0.0302914		Avg Stain 1 Cytoplasmic OD	0.0299318		Avg Stain 1 Cytoplasmic OD	0.0314936
		Avg Stain 2 Cytoplasmic OD	0.0314465		Avg Stain 2 Cytoplasmic OD	0.031702		Avg Stain 2 Cytoplasmic OD	0.0316853		Avg Stain 2 Cytoplasmic OD	0.0316605		Avg Stain 2 Cytoplasmic OD	0.0319423		Avg Stain 2 Cytoplasmic OD	0.0317194		Avg Stain 2 Cytoplasmic OD	0.0316127		Avg Stain 2 Cytoplasmic OD	0.0319017
		Avg Cell Area (µm²)	93.9669		Avg Cell Area (µm²)	100.828		Avg Cell Area (µm²)	109.43		Avg Cell Area (µm²)	105.598		Avg Cell Area (µm²)	114.818		Avg Cell Area (µm²)	86.6091		Avg Cell Area (µm²)	99.39		Avg Cell Area (µm²)	100.781
		Avg Cytoplasm Area (µm²)	59.2458		Avg Cytoplasm Area (µm²)	63.6836		Avg Cytoplasm Area (µm²)	67.9105		Avg Cytoplasm Area (µm²)	69.9719		Avg Cytoplasm Area (µm²)	78.374		Avg Cytoplasm Area (µm²)	55.5518		Avg Cytoplasm Area (µm²)	68.8307		Avg Cytoplasm Area (µm²)	65.1689
		Avg Nucleus Area (µm²)	34.7211		Avg Nucleus Area (µm²)	37.1448		Avg Nucleus Area (µm²)	41.5191		Avg Nucleus Area (µm²)	35.6259		Avg Nucleus Area (µm²)	36.4443		Avg Nucleus Area (µm²)	31.0574		Avg Nucleus Area (µm²)	30.5593		Avg Nucleus Area (µm²)	35.612
		Avg Nucleus Perimeter (µm)	13.5887		Avg Nucleus Perimeter (µm)	14.5478		Avg Nucleus Perimeter (µm)	15.9948		Avg Nucleus Perimeter (µm)	13.9479		Avg Nucleus Perimeter (µm)	14.2321		Avg Nucleus Perimeter (µm)	12.2981		Avg Nucleus Perimeter (µm)	12.0805		Avg Nucleus Perimeter (µm)	13.8148
		Avg Nucleus Roundness	0.671538		Avg Nucleus Roundness	0.672494		Avg Nucleus Roundness	0.67755		Avg Nucleus Roundness	0.683845		Avg Nucleus Roundness	0.684087		Avg Nucleus Roundness	0.672486		Avg Nucleus Roundness	0.680835		Avg Nucleus Roundness	0.6749
		Tissue Area (µm²)	814411		Tissue Area (µm²)	708666		Tissue Area (µm²)	796852		Tissue Area (µm²)	324731		Tissue Area (µm²)	908157		Tissue Area (µm²)	924874		Tissue Area (µm²)	453443		Tissue Area (µm²)	367496
		Tumor: Total Cells	4580		Tumor: Total Cells	3725		Tumor: Total Cells	3950		Tumor: Total Cells	1700		Tumor: Total Cells	3811		Tumor: Total Cells	5694		Tumor: Total Cells	2253		Tumor: Total Cells	1990
		Tumor: Stain 1 Positive Cells	46		Tumor: Stain 1 Positive Cells	53		Tumor: Stain 1 Positive Cells	133		Tumor: Stain 1 Positive Cells	15		Tumor: Stain 1 Positive Cells	45		Tumor: Stain 1 Positive Cells	69		Tumor: Stain 1 Positive Cells	13		Tumor: Stain 1 Positive Cells	40
		Tumor: Stain 1 0+ Cells	4534		Tumor: Stain 1 0+ Cells	3672		Tumor: Stain 1 0+ Cells	3817		Tumor: Stain 1 0+ Cells	1685		Tumor: Stain 1 0+ Cells	3766		Tumor: Stain 1 0+ Cells	5625		Tumor: Stain 1 0+ Cells	2240		Tumor: Stain 1 0+ Cells	1950
		Tumor: Stain 1 1+ Cells	29		Tumor: Stain 1 1+ Cells	29		Tumor: Stain 1 1+ Cells	53		Tumor: Stain 1 1+ Cells	9		Tumor: Stain 1 1+ Cells	31		Tumor: Stain 1 1+ Cells	47		Tumor: Stain 1 1+ Cells	10		Tumor: Stain 1 1+ Cells	22
		Tumor: Stain 1 2+ Cells	10		Tumor: Stain 1 2+ Cells	20		Tumor: Stain 1 2+ Cells	49		Tumor: Stain 1 2+ Cells	5		Tumor: Stain 1 2+ Cells	5		Tumor: Stain 1 2+ Cells	17		Tumor: Stain 1 2+ Cells	3		Tumor: Stain 1 2+ Cells	11
		Tumor: Stain 1 3+ Cells	7		Tumor: Stain 1 3+ Cells	4		Tumor: Stain 1 3+ Cells	31		Tumor: Stain 1 3+ Cells	1		Tumor: Stain 1 3+ Cells	9		Tumor: Stain 1 3+ Cells	5		Tumor: Stain 1 3+ Cells	0		Tumor: Stain 1 3+ Cells	7
		Tumor: Stain 2 Positive Cells	0		Tumor: Stain 2 Positive Cells	0		Tumor: Stain 2 Positive Cells	0		Tumor: Stain 2 Positive Cells	0		Tumor: Stain 2 Positive Cells	0		Tumor: Stain 2 Positive Cells	0		Tumor: Stain 2 Positive Cells	0		Tumor: Stain 2 Positive Cells	0
		Tumor: Stain 2 0+ Cells	4580		Tumor: Stain 2 0+ Cells	3725		Tumor: Stain 2 0+ Cells	3950		Tumor: Stain 2 0+ Cells	1700		Tumor: Stain 2 0+ Cells	3811		Tumor: Stain 2 0+ Cells	5694		Tumor: Stain 2 0+ Cells	2253		Tumor: Stain 2 0+ Cells	1990
		Tumor: Stain 2 1+ Cells	0		Tumor: Stain 2 1+ Cells	0		Tumor: Stain 2 1+ Cells	0		Tumor: Stain 2 1+ Cells	0		Tumor: Stain 2 1+ Cells	0		Tumor: Stain 2 1+ Cells	0		Tumor: Stain 2 1+ Cells	0		Tumor: Stain 2 1+ Cells	0
		Tumor: Stain 2 2+ Cells	0		Tumor: Stain 2 2+ Cells	0		Tumor: Stain 2 2+ Cells	0		Tumor: Stain 2 2+ Cells	0		Tumor: Stain 2 2+ Cells	0		Tumor: Stain 2 2+ Cells	0		Tumor: Stain 2 2+ Cells	0		Tumor: Stain 2 2+ Cells	0
		Tumor: Stain 2 3+ Cells	0		Tumor: Stain 2 3+ Cells	0		Tumor: Stain 2 3+ Cells	0		Tumor: Stain 2 3+ Cells	0		Tumor: Stain 2 3+ Cells	0		Tumor: Stain 2 3+ Cells	0		Tumor: Stain 2 3+ Cells	0		Tumor: Stain 2 3+ Cells	0
		Tumor: Dual Positive Cells	0		Tumor: Dual Positive Cells	0		Tumor: Dual Positive Cells	0		Tumor: Dual Positive Cells	0		Tumor: Dual Positive Cells	0		Tumor: Dual Positive Cells	0		Tumor: Dual Positive Cells	0		Tumor: Dual Positive Cells	0
		Tumor: Dual Negative Cells	4534		Tumor: Dual Negative Cells	3672		Tumor: Dual Negative Cells	3817		Tumor: Dual Negative Cells	1685		Tumor: Dual Negative Cells	3766		Tumor: Dual Negative Cells	5625		Tumor: Dual Negative Cells	2240		Tumor: Dual Negative Cells	1950
		Tumor: % Stain 1 Positive Cells	1.00437		Tumor: % Stain 1 Positive Cells	1.42282		Tumor: % Stain 1 Positive Cells	3.36709		Tumor: % Stain 1 Positive Cells	0.882353		Tumor: % Stain 1 Positive Cells	1.18079		Tumor: % Stain 1 Positive Cells	1.2118		Tumor: % Stain 1 Positive Cells	0.577008		Tumor: % Stain 1 Positive Cells	2.01005		1.45704
		Tumor: % Stain 1 0+ Cells	98.9956		Tumor: % Stain 1 0+ Cells	98.5772		Tumor: % Stain 1 0+ Cells	96.6329		Tumor: % Stain 1 0+ Cells	99.1176		Tumor: % Stain 1 0+ Cells	98.8192		Tumor: % Stain 1 0+ Cells	98.7882		Tumor: % Stain 1 0+ Cells	99.423		Tumor: % Stain 1 0+ Cells	97.9899
		Tumor: % Stain 1 1+ Cells	0.633188		Tumor: % Stain 1 1+ Cells	0.778523		Tumor: % Stain 1 1+ Cells	1.34177		Tumor: % Stain 1 1+ Cells	0.529412		Tumor: % Stain 1 1+ Cells	0.813435		Tumor: % Stain 1 1+ Cells	0.82543		Tumor: % Stain 1 1+ Cells	0.443853		Tumor: % Stain 1 1+ Cells	1.10553
		Tumor: % Stain 1 2+ Cells	0.218341		Tumor: % Stain 1 2+ Cells	0.536913		Tumor: % Stain 1 2+ Cells	1.24051		Tumor: % Stain 1 2+ Cells	0.294118		Tumor: % Stain 1 2+ Cells	0.131199		Tumor: % Stain 1 2+ Cells	0.29856		Tumor: % Stain 1 2+ Cells	0.133156		Tumor: % Stain 1 2+ Cells	0.552764
		Tumor: % Stain 1 3+ Cells	0.152838		Tumor: % Stain 1 3+ Cells	0.107383		Tumor: % Stain 1 3+ Cells	0.78481		Tumor: % Stain 1 3+ Cells	0.0588235		Tumor: % Stain 1 3+ Cells	0.236158		Tumor: % Stain 1 3+ Cells	0.0878117		Tumor: % Stain 1 3+ Cells	0		Tumor: % Stain 1 3+ Cells	0.351759
		Tumor: Stain 1 H-Score	1.52838		Tumor: Stain 1 H-Score	2.1745		Tumor: Stain 1 H-Score	6.17722		Tumor: Stain 1 H-Score	1.29412		Tumor: Stain 1 H-Score	1.78431		Tumor: Stain 1 H-Score	1.68599		Tumor: Stain 1 H-Score	0.710164		Tumor: Stain 1 H-Score	3.26633
		Tumor: % Stain 2 Positive Cells	0		Tumor: % Stain 2 Positive Cells	0		Tumor: % Stain 2 Positive Cells	0		Tumor: % Stain 2 Positive Cells	0		Tumor: % Stain 2 Positive Cells	0		Tumor: % Stain 2 Positive Cells	0		Tumor: % Stain 2 Positive Cells	0		Tumor: % Stain 2 Positive Cells	0
		Tumor: % Stain 2 0+ Cells	100		Tumor: % Stain 2 0+ Cells	100		Tumor: % Stain 2 0+ Cells	100		Tumor: % Stain 2 0+ Cells	100		Tumor: % Stain 2 0+ Cells	100		Tumor: % Stain 2 0+ Cells	100		Tumor: % Stain 2 0+ Cells	100		Tumor: % Stain 2 0+ Cells	100
		Tumor: % Stain 2 1+ Cells	0		Tumor: % Stain 2 1+ Cells	0		Tumor: % Stain 2 1+ Cells	0		Tumor: % Stain 2 1+ Cells	0		Tumor: % Stain 2 1+ Cells	0		Tumor: % Stain 2 1+ Cells	0		Tumor: % Stain 2 1+ Cells	0		Tumor: % Stain 2 1+ Cells	0
		Tumor: % Stain 2 2+ Cells	0		Tumor: % Stain 2 2+ Cells	0		Tumor: % Stain 2 2+ Cells	0		Tumor: % Stain 2 2+ Cells	0		Tumor: % Stain 2 2+ Cells	0		Tumor: % Stain 2 2+ Cells	0		Tumor: % Stain 2 2+ Cells	0		Tumor: % Stain 2 2+ Cells	0
		Tumor: % Stain 2 3+ Cells	0		Tumor: % Stain 2 3+ Cells	0		Tumor: % Stain 2 3+ Cells	0		Tumor: % Stain 2 3+ Cells	0		Tumor: % Stain 2 3+ Cells	0		Tumor: % Stain 2 3+ Cells	0		Tumor: % Stain 2 3+ Cells	0		Tumor: % Stain 2 3+ Cells	0
		Tumor: Stain 2 H-Score	0		Tumor: Stain 2 H-Score	0		Tumor: Stain 2 H-Score	0		Tumor: Stain 2 H-Score	0		Tumor: Stain 2 H-Score	0		Tumor: Stain 2 H-Score	0		Tumor: Stain 2 H-Score	0		Tumor: Stain 2 H-Score	0
		Tumor: % Dual Positive Cells	0		Tumor: % Dual Positive Cells	0		Tumor: % Dual Positive Cells	0		Tumor: % Dual Positive Cells	0		Tumor: % Dual Positive Cells	0		Tumor: % Dual Positive Cells	0		Tumor: % Dual Positive Cells	0		Tumor: % Dual Positive Cells	0
		Tumor: % Dual Negative Cells	98.9956		Tumor: % Dual Negative Cells	98.5772		Tumor: % Dual Negative Cells	96.6329		Tumor: % Dual Negative Cells	99.1176		Tumor: % Dual Negative Cells	98.8192		Tumor: % Dual Negative Cells	98.7882		Tumor: % Dual Negative Cells	99.423		Tumor: % Dual Negative Cells	97.9899
		Tumor: Avg Stain 1 Nuclear OD	0.0333435		Tumor: Avg Stain 1 Nuclear OD	0.0368171		Tumor: Avg Stain 1 Nuclear OD	0.047081		Tumor: Avg Stain 1 Nuclear OD	0.0340589		Tumor: Avg Stain 1 Nuclear OD	0.0346615		Tumor: Avg Stain 1 Nuclear OD	0.0345046		Tumor: Avg Stain 1 Nuclear OD	0.0311631		Tumor: Avg Stain 1 Nuclear OD	0.0396147
		Tumor: Avg Stain 2 Nuclear OD	0.0356202		Tumor: Avg Stain 2 Nuclear OD	0.0361244		Tumor: Avg Stain 2 Nuclear OD	0.0358393		Tumor: Avg Stain 2 Nuclear OD	0.0346546		Tumor: Avg Stain 2 Nuclear OD	0.0354533		Tumor: Avg Stain 2 Nuclear OD	0.0360723		Tumor: Avg Stain 2 Nuclear OD	0.0343819		Tumor: Avg Stain 2 Nuclear OD	0.035731
		Tumor: Avg Stain 1 Cytoplasmic OD	0.0302973		Tumor: Avg Stain 1 Cytoplasmic OD	0.0308358		Tumor: Avg Stain 1 Cytoplasmic OD	0.033186		Tumor: Avg Stain 1 Cytoplasmic OD	0.0306501		Tumor: Avg Stain 1 Cytoplasmic OD	0.0301103		Tumor: Avg Stain 1 Cytoplasmic OD	0.0302914		Tumor: Avg Stain 1 Cytoplasmic OD	0.0299318		Tumor: Avg Stain 1 Cytoplasmic OD	0.0314936
		Tumor: Avg Stain 2 Cytoplasmic OD	0.0314465		Tumor: Avg Stain 2 Cytoplasmic OD	0.031702		Tumor: Avg Stain 2 Cytoplasmic OD	0.0316853		Tumor: Avg Stain 2 Cytoplasmic OD	0.0316605		Tumor: Avg Stain 2 Cytoplasmic OD	0.0319423		Tumor: Avg Stain 2 Cytoplasmic OD	0.0317194		Tumor: Avg Stain 2 Cytoplasmic OD	0.0316127		Tumor: Avg Stain 2 Cytoplasmic OD	0.0319017
		Tumor: Avg Cell Area (µm²)	93.9669		Tumor: Avg Cell Area (µm²)	100.828		Tumor: Avg Cell Area (µm²)	109.43		Tumor: Avg Cell Area (µm²)	105.598		Tumor: Avg Cell Area (µm²)	114.818		Tumor: Avg Cell Area (µm²)	86.6091		Tumor: Avg Cell Area (µm²)	99.39		Tumor: Avg Cell Area (µm²)	100.781
		Tumor: Avg Cytoplasm Area (µm²)	59.2458		Tumor: Avg Cytoplasm Area (µm²)	63.6836		Tumor: Avg Cytoplasm Area (µm²)	67.9105		Tumor: Avg Cytoplasm Area (µm²)	69.9719		Tumor: Avg Cytoplasm Area (µm²)	78.374		Tumor: Avg Cytoplasm Area (µm²)	55.5518		Tumor: Avg Cytoplasm Area (µm²)	68.8307		Tumor: Avg Cytoplasm Area (µm²)	65.1689
		Tumor: Avg Nucleus Area (µm²)	34.7211		Tumor: Avg Nucleus Area (µm²)	37.1448		Tumor: Avg Nucleus Area (µm²)	41.5191		Tumor: Avg Nucleus Area (µm²)	35.6259		Tumor: Avg Nucleus Area (µm²)	36.4443		Tumor: Avg Nucleus Area (µm²)	31.0574		Tumor: Avg Nucleus Area (µm²)	30.5593		Tumor: Avg Nucleus Area (µm²)	35.612
		Tumor: Avg Nucleus Perimeter (µm)	13.5887		Tumor: Avg Nucleus Perimeter (µm)	14.5478		Tumor: Avg Nucleus Perimeter (µm)	15.9948		Tumor: Avg Nucleus Perimeter (µm)	13.9479		Tumor: Avg Nucleus Perimeter (µm)	14.2321		Tumor: Avg Nucleus Perimeter (µm)	12.2981		Tumor: Avg Nucleus Perimeter (µm)	12.0805		Tumor: Avg Nucleus Perimeter (µm)	13.8148
		Tumor: Avg Nucleus Roundness	0.671538		Tumor: Avg Nucleus Roundness	0.672494		Tumor: Avg Nucleus Roundness	0.67755		Tumor: Avg Nucleus Roundness	0.683845		Tumor: Avg Nucleus Roundness	0.684087		Tumor: Avg Nucleus Roundness	0.672486		Tumor: Avg Nucleus Roundness	0.680835		Tumor: Avg Nucleus Roundness	0.6749
		Tumor: Tissue Area (µm²)	814411		Tumor: Tissue Area (µm²)	708666		Tumor: Tissue Area (µm²)	796852		Tumor: Tissue Area (µm²)	324731		Tumor: Tissue Area (µm²)	908157		Tumor: Tissue Area (µm²)	924874		Tumor: Tissue Area (µm²)	453443		Tumor: Tissue Area (µm²)	367496
		BSNA35.1a	WT
		Name	Value		Name	Value		Name	Value		Name	Value		Name	Value		Name	Value		Name	Value		Name	Value
		Classified Area (mm²)	0.61906		Classified Area (mm²)	0.67994		Classified Area (mm²)	0.753		Classified Area (mm²)	0.59272		Classified Area (mm²)	0.91906		Classified Area (mm²)	1.11032		Classified Area (mm²)	0.66344		Classified Area (mm²)	0.69839
		Tumor Area (mm²)	0.61458		Tumor Area (mm²)	0.67892		Tumor Area (mm²)	0.74707		Tumor Area (mm²)	0.58966		Tumor Area (mm²)	0.89921		Tumor Area (mm²)	1.10291		Tumor Area (mm²)	0.66063		Tumor Area (mm²)	0.68847
		Necrosis Area (mm²)	0		Necrosis Area (mm²)	0		Necrosis Area (mm²)	0		Necrosis Area (mm²)	0		Necrosis Area (mm²)	0		Necrosis Area (mm²)	0		Necrosis Area (mm²)	0		Necrosis Area (mm²)	0
		Empty Area (mm²)	0		Empty Area (mm²)	0.00029		Empty Area (mm²)	0.00016		Empty Area (mm²)	0		Empty Area (mm²)	0		Empty Area (mm²)	0.00133		Empty Area (mm²)	0		Empty Area (mm²)	0
		Normal Area (mm²)	0.00448		Normal Area (mm²)	0.00074		Normal Area (mm²)	0.00576		Normal Area (mm²)	0.00306		Normal Area (mm²)	0.01985		Normal Area (mm²)	0.00608		Normal Area (mm²)	0.00281		Normal Area (mm²)	0.00992
		Total Cells	2951		Total Cells	3356		Total Cells	3771		Total Cells	3137		Total Cells	5167		Total Cells	5598		Total Cells	3315		Total Cells	3668
		Stain 1 Positive Cells	7		Stain 1 Positive Cells	11		Stain 1 Positive Cells	20		Stain 1 Positive Cells	6		Stain 1 Positive Cells	25		Stain 1 Positive Cells	21		Stain 1 Positive Cells	12		Stain 1 Positive Cells	17
		Stain 1 0+ Cells	2944		Stain 1 0+ Cells	3345		Stain 1 0+ Cells	3751		Stain 1 0+ Cells	3131		Stain 1 0+ Cells	5142		Stain 1 0+ Cells	5577		Stain 1 0+ Cells	3303		Stain 1 0+ Cells	3651
		Stain 1 1+ Cells	3		Stain 1 1+ Cells	6		Stain 1 1+ Cells	8		Stain 1 1+ Cells	3		Stain 1 1+ Cells	15		Stain 1 1+ Cells	14		Stain 1 1+ Cells	7		Stain 1 1+ Cells	8
		Stain 1 2+ Cells	2		Stain 1 2+ Cells	2		Stain 1 2+ Cells	9		Stain 1 2+ Cells	0		Stain 1 2+ Cells	9		Stain 1 2+ Cells	5		Stain 1 2+ Cells	2		Stain 1 2+ Cells	3
		Stain 1 3+ Cells	2		Stain 1 3+ Cells	3		Stain 1 3+ Cells	3		Stain 1 3+ Cells	3		Stain 1 3+ Cells	1		Stain 1 3+ Cells	2		Stain 1 3+ Cells	3		Stain 1 3+ Cells	6
		Stain 2 Positive Cells	0		Stain 2 Positive Cells	0		Stain 2 Positive Cells	0		Stain 2 Positive Cells	0		Stain 2 Positive Cells	0		Stain 2 Positive Cells	0		Stain 2 Positive Cells	0		Stain 2 Positive Cells	0
		Stain 2 0+ Cells	2951		Stain 2 0+ Cells	3356		Stain 2 0+ Cells	3771		Stain 2 0+ Cells	3137		Stain 2 0+ Cells	5167		Stain 2 0+ Cells	5598		Stain 2 0+ Cells	3315		Stain 2 0+ Cells	3668
		Stain 2 1+ Cells	0		Stain 2 1+ Cells	0		Stain 2 1+ Cells	0		Stain 2 1+ Cells	0		Stain 2 1+ Cells	0		Stain 2 1+ Cells	0		Stain 2 1+ Cells	0		Stain 2 1+ Cells	0
		Stain 2 2+ Cells	0		Stain 2 2+ Cells	0		Stain 2 2+ Cells	0		Stain 2 2+ Cells	0		Stain 2 2+ Cells	0		Stain 2 2+ Cells	0		Stain 2 2+ Cells	0		Stain 2 2+ Cells	0
		Stain 2 3+ Cells	0		Stain 2 3+ Cells	0		Stain 2 3+ Cells	0		Stain 2 3+ Cells	0		Stain 2 3+ Cells	0		Stain 2 3+ Cells	0		Stain 2 3+ Cells	0		Stain 2 3+ Cells	0
		Dual Positive Cells	0		Dual Positive Cells	0		Dual Positive Cells	0		Dual Positive Cells	0		Dual Positive Cells	0		Dual Positive Cells	0		Dual Positive Cells	0		Dual Positive Cells	0
		Dual Negative Cells	2944		Dual Negative Cells	3345		Dual Negative Cells	3751		Dual Negative Cells	3131		Dual Negative Cells	5142		Dual Negative Cells	5577		Dual Negative Cells	3303		Dual Negative Cells	3651
		% Stain 1 Positive Cells	0.237208		% Stain 1 Positive Cells	0.327771		% Stain 1 Positive Cells	0.530363		% Stain 1 Positive Cells	0.191266		% Stain 1 Positive Cells	0.48384		% Stain 1 Positive Cells	0.375134		% Stain 1 Positive Cells	0.361991		% Stain 1 Positive Cells	0.463468		0.37138
		% Stain 1 0+ Cells	99.7628		% Stain 1 0+ Cells	99.6722		% Stain 1 0+ Cells	99.4696		% Stain 1 0+ Cells	99.8087		% Stain 1 0+ Cells	99.5162		% Stain 1 0+ Cells	99.6249		% Stain 1 0+ Cells	99.638		% Stain 1 0+ Cells	99.5365
		% Stain 1 1+ Cells	0.10166		% Stain 1 1+ Cells	0.178784		% Stain 1 1+ Cells	0.212145		% Stain 1 1+ Cells	0.0956328		% Stain 1 1+ Cells	0.290304		% Stain 1 1+ Cells	0.250089		% Stain 1 1+ Cells	0.211161		% Stain 1 1+ Cells	0.218103
		% Stain 1 2+ Cells	0.0677736		% Stain 1 2+ Cells	0.0595948		% Stain 1 2+ Cells	0.238663		% Stain 1 2+ Cells	0		% Stain 1 2+ Cells	0.174182		% Stain 1 2+ Cells	0.0893176		% Stain 1 2+ Cells	0.0603318		% Stain 1 2+ Cells	0.0817884
		% Stain 1 3+ Cells	0.0677736		% Stain 1 3+ Cells	0.0893921		% Stain 1 3+ Cells	0.0795545		% Stain 1 3+ Cells	0.0956328		% Stain 1 3+ Cells	0.0193536		% Stain 1 3+ Cells	0.035727		% Stain 1 3+ Cells	0.0904977		% Stain 1 3+ Cells	0.163577
		Stain 1 H-Score	0.440529		Stain 1 H-Score	0.56615		Stain 1 H-Score	0.928136		Stain 1 H-Score	0.382531		Stain 1 H-Score	0.696729		Stain 1 H-Score	0.535906		Stain 1 H-Score	0.603318		Stain 1 H-Score	0.87241
		% Stain 2 Positive Cells	0		% Stain 2 Positive Cells	0		% Stain 2 Positive Cells	0		% Stain 2 Positive Cells	0		% Stain 2 Positive Cells	0		% Stain 2 Positive Cells	0		% Stain 2 Positive Cells	0		% Stain 2 Positive Cells	0
		% Stain 2 0+ Cells	100		% Stain 2 0+ Cells	100		% Stain 2 0+ Cells	100		% Stain 2 0+ Cells	100		% Stain 2 0+ Cells	100		% Stain 2 0+ Cells	100		% Stain 2 0+ Cells	100		% Stain 2 0+ Cells	100
		% Stain 2 1+ Cells	0		% Stain 2 1+ Cells	0		% Stain 2 1+ Cells	0		% Stain 2 1+ Cells	0		% Stain 2 1+ Cells	0		% Stain 2 1+ Cells	0		% Stain 2 1+ Cells	0		% Stain 2 1+ Cells	0
		% Stain 2 2+ Cells	0		% Stain 2 2+ Cells	0		% Stain 2 2+ Cells	0		% Stain 2 2+ Cells	0		% Stain 2 2+ Cells	0		% Stain 2 2+ Cells	0		% Stain 2 2+ Cells	0		% Stain 2 2+ Cells	0
		% Stain 2 3+ Cells	0		% Stain 2 3+ Cells	0		% Stain 2 3+ Cells	0		% Stain 2 3+ Cells	0		% Stain 2 3+ Cells	0		% Stain 2 3+ Cells	0		% Stain 2 3+ Cells	0		% Stain 2 3+ Cells	0
		Stain 2 H-Score	0		Stain 2 H-Score	0		Stain 2 H-Score	0		Stain 2 H-Score	0		Stain 2 H-Score	0		Stain 2 H-Score	0		Stain 2 H-Score	0		Stain 2 H-Score	0
		% Dual Positive Cells	0		% Dual Positive Cells	0		% Dual Positive Cells	0		% Dual Positive Cells	0		% Dual Positive Cells	0		% Dual Positive Cells	0		% Dual Positive Cells	0		% Dual Positive Cells	0
		% Dual Negative Cells	99.7628		% Dual Negative Cells	99.6722		% Dual Negative Cells	99.4696		% Dual Negative Cells	99.8087		% Dual Negative Cells	99.5162		% Dual Negative Cells	99.6249		% Dual Negative Cells	99.638		% Dual Negative Cells	99.5365
		Avg Stain 1 Nuclear OD	0.0299289		Avg Stain 1 Nuclear OD	0.0309348		Avg Stain 1 Nuclear OD	0.0314746		Avg Stain 1 Nuclear OD	0.0305013		Avg Stain 1 Nuclear OD	0.0309248		Avg Stain 1 Nuclear OD	0.0315364		Avg Stain 1 Nuclear OD	0.0310291		Avg Stain 1 Nuclear OD	0.0318121
		Avg Stain 2 Nuclear OD	0.0352392		Avg Stain 2 Nuclear OD	0.0345209		Avg Stain 2 Nuclear OD	0.0350905		Avg Stain 2 Nuclear OD	0.0344385		Avg Stain 2 Nuclear OD	0.0348854		Avg Stain 2 Nuclear OD	0.0337962		Avg Stain 2 Nuclear OD	0.0343631		Avg Stain 2 Nuclear OD	0.0353681
		Avg Stain 1 Cytoplasmic OD	0.0295039		Avg Stain 1 Cytoplasmic OD	0.0304477		Avg Stain 1 Cytoplasmic OD	0.0304206		Avg Stain 1 Cytoplasmic OD	0.0307872		Avg Stain 1 Cytoplasmic OD	0.0306708		Avg Stain 1 Cytoplasmic OD	0.0316373		Avg Stain 1 Cytoplasmic OD	0.0302686		Avg Stain 1 Cytoplasmic OD	0.0302535
		Avg Stain 2 Cytoplasmic OD	0.0317765		Avg Stain 2 Cytoplasmic OD	0.0313712		Avg Stain 2 Cytoplasmic OD	0.0315793		Avg Stain 2 Cytoplasmic OD	0.0313142		Avg Stain 2 Cytoplasmic OD	0.0312674		Avg Stain 2 Cytoplasmic OD	0.030891		Avg Stain 2 Cytoplasmic OD	0.0315278		Avg Stain 2 Cytoplasmic OD	0.0319595
		Avg Cell Area (µm²)	88.5574		Avg Cell Area (µm²)	97.3757		Avg Cell Area (µm²)	98.6004		Avg Cell Area (µm²)	92.0656		Avg Cell Area (µm²)	88.8396		Avg Cell Area (µm²)	93.8761		Avg Cell Area (µm²)	92.9741		Avg Cell Area (µm²)	93.6454
		Avg Cytoplasm Area (µm²)	61.066		Avg Cytoplasm Area (µm²)	69.3061		Avg Cytoplasm Area (µm²)	69.1481		Avg Cytoplasm Area (µm²)	65.1678		Avg Cytoplasm Area (µm²)	59.3888		Avg Cytoplasm Area (µm²)	67.5301		Avg Cytoplasm Area (µm²)	66.0113		Avg Cytoplasm Area (µm²)	66.2648
		Avg Nucleus Area (µm²)	27.4915		Avg Nucleus Area (µm²)	28.0696		Avg Nucleus Area (µm²)	29.4523		Avg Nucleus Area (µm²)	26.8978		Avg Nucleus Area (µm²)	29.4508		Avg Nucleus Area (µm²)	26.3461		Avg Nucleus Area (µm²)	26.9628		Avg Nucleus Area (µm²)	27.3806
		Avg Nucleus Perimeter (µm)	10.9063		Avg Nucleus Perimeter (µm)	11.1331		Avg Nucleus Perimeter (µm)	11.6486		Avg Nucleus Perimeter (µm)	10.6829		Avg Nucleus Perimeter (µm)	11.6867		Avg Nucleus Perimeter (µm)	10.4639		Avg Nucleus Perimeter (µm)	10.7109		Avg Nucleus Perimeter (µm)	10.8602
		Avg Nucleus Roundness	0.673672		Avg Nucleus Roundness	0.690798		Avg Nucleus Roundness	0.68695		Avg Nucleus Roundness	0.68647		Avg Nucleus Roundness	0.680571		Avg Nucleus Roundness	0.686967		Avg Nucleus Roundness	0.683232		Avg Nucleus Roundness	0.685627
		Tissue Area (µm²)	502065		Tissue Area (µm²)	677273		Tissue Area (µm²)	748546		Tissue Area (µm²)	588088		Tissue Area (µm²)	905051		Tissue Area (µm²)	1089280		Tissue Area (µm²)	619701		Tissue Area (µm²)	690348
		Tumor: Total Cells	2951		Tumor: Total Cells	3356		Tumor: Total Cells	3771		Tumor: Total Cells	3137		Tumor: Total Cells	5167		Tumor: Total Cells	5598		Tumor: Total Cells	3315		Tumor: Total Cells	3668
		Tumor: Stain 1 Positive Cells	7		Tumor: Stain 1 Positive Cells	11		Tumor: Stain 1 Positive Cells	20		Tumor: Stain 1 Positive Cells	6		Tumor: Stain 1 Positive Cells	25		Tumor: Stain 1 Positive Cells	21		Tumor: Stain 1 Positive Cells	12		Tumor: Stain 1 Positive Cells	17
		Tumor: Stain 1 0+ Cells	2944		Tumor: Stain 1 0+ Cells	3345		Tumor: Stain 1 0+ Cells	3751		Tumor: Stain 1 0+ Cells	3131		Tumor: Stain 1 0+ Cells	5142		Tumor: Stain 1 0+ Cells	5577		Tumor: Stain 1 0+ Cells	3303		Tumor: Stain 1 0+ Cells	3651
		Tumor: Stain 1 1+ Cells	3		Tumor: Stain 1 1+ Cells	6		Tumor: Stain 1 1+ Cells	8		Tumor: Stain 1 1+ Cells	3		Tumor: Stain 1 1+ Cells	15		Tumor: Stain 1 1+ Cells	14		Tumor: Stain 1 1+ Cells	7		Tumor: Stain 1 1+ Cells	8
		Tumor: Stain 1 2+ Cells	2		Tumor: Stain 1 2+ Cells	2		Tumor: Stain 1 2+ Cells	9		Tumor: Stain 1 2+ Cells	0		Tumor: Stain 1 2+ Cells	9		Tumor: Stain 1 2+ Cells	5		Tumor: Stain 1 2+ Cells	2		Tumor: Stain 1 2+ Cells	3
		Tumor: Stain 1 3+ Cells	2		Tumor: Stain 1 3+ Cells	3		Tumor: Stain 1 3+ Cells	3		Tumor: Stain 1 3+ Cells	3		Tumor: Stain 1 3+ Cells	1		Tumor: Stain 1 3+ Cells	2		Tumor: Stain 1 3+ Cells	3		Tumor: Stain 1 3+ Cells	6
		Tumor: Stain 2 Positive Cells	0		Tumor: Stain 2 Positive Cells	0		Tumor: Stain 2 Positive Cells	0		Tumor: Stain 2 Positive Cells	0		Tumor: Stain 2 Positive Cells	0		Tumor: Stain 2 Positive Cells	0		Tumor: Stain 2 Positive Cells	0		Tumor: Stain 2 Positive Cells	0
		Tumor: Stain 2 0+ Cells	2951		Tumor: Stain 2 0+ Cells	3356		Tumor: Stain 2 0+ Cells	3771		Tumor: Stain 2 0+ Cells	3137		Tumor: Stain 2 0+ Cells	5167		Tumor: Stain 2 0+ Cells	5598		Tumor: Stain 2 0+ Cells	3315		Tumor: Stain 2 0+ Cells	3668
		Tumor: Stain 2 1+ Cells	0		Tumor: Stain 2 1+ Cells	0		Tumor: Stain 2 1+ Cells	0		Tumor: Stain 2 1+ Cells	0		Tumor: Stain 2 1+ Cells	0		Tumor: Stain 2 1+ Cells	0		Tumor: Stain 2 1+ Cells	0		Tumor: Stain 2 1+ Cells	0
		Tumor: Stain 2 2+ Cells	0		Tumor: Stain 2 2+ Cells	0		Tumor: Stain 2 2+ Cells	0		Tumor: Stain 2 2+ Cells	0		Tumor: Stain 2 2+ Cells	0		Tumor: Stain 2 2+ Cells	0		Tumor: Stain 2 2+ Cells	0		Tumor: Stain 2 2+ Cells	0
		Tumor: Stain 2 3+ Cells	0		Tumor: Stain 2 3+ Cells	0		Tumor: Stain 2 3+ Cells	0		Tumor: Stain 2 3+ Cells	0		Tumor: Stain 2 3+ Cells	0		Tumor: Stain 2 3+ Cells	0		Tumor: Stain 2 3+ Cells	0		Tumor: Stain 2 3+ Cells	0
		Tumor: Dual Positive Cells	0		Tumor: Dual Positive Cells	0		Tumor: Dual Positive Cells	0		Tumor: Dual Positive Cells	0		Tumor: Dual Positive Cells	0		Tumor: Dual Positive Cells	0		Tumor: Dual Positive Cells	0		Tumor: Dual Positive Cells	0
		Tumor: Dual Negative Cells	2944		Tumor: Dual Negative Cells	3345		Tumor: Dual Negative Cells	3751		Tumor: Dual Negative Cells	3131		Tumor: Dual Negative Cells	5142		Tumor: Dual Negative Cells	5577		Tumor: Dual Negative Cells	3303		Tumor: Dual Negative Cells	3651
		Tumor: % Stain 1 Positive Cells	0.237208		Tumor: % Stain 1 Positive Cells	0.327771		Tumor: % Stain 1 Positive Cells	0.530363		Tumor: % Stain 1 Positive Cells	0.191266		Tumor: % Stain 1 Positive Cells	0.48384		Tumor: % Stain 1 Positive Cells	0.375134		Tumor: % Stain 1 Positive Cells	0.361991		Tumor: % Stain 1 Positive Cells	0.463468
		Tumor: % Stain 1 0+ Cells	99.7628		Tumor: % Stain 1 0+ Cells	99.6722		Tumor: % Stain 1 0+ Cells	99.4696		Tumor: % Stain 1 0+ Cells	99.8087		Tumor: % Stain 1 0+ Cells	99.5162		Tumor: % Stain 1 0+ Cells	99.6249		Tumor: % Stain 1 0+ Cells	99.638		Tumor: % Stain 1 0+ Cells	99.5365
		Tumor: % Stain 1 1+ Cells	0.10166		Tumor: % Stain 1 1+ Cells	0.178784		Tumor: % Stain 1 1+ Cells	0.212145		Tumor: % Stain 1 1+ Cells	0.0956328		Tumor: % Stain 1 1+ Cells	0.290304		Tumor: % Stain 1 1+ Cells	0.250089		Tumor: % Stain 1 1+ Cells	0.211161		Tumor: % Stain 1 1+ Cells	0.218103
		Tumor: % Stain 1 2+ Cells	0.0677736		Tumor: % Stain 1 2+ Cells	0.0595948		Tumor: % Stain 1 2+ Cells	0.238663		Tumor: % Stain 1 2+ Cells	0		Tumor: % Stain 1 2+ Cells	0.174182		Tumor: % Stain 1 2+ Cells	0.0893176		Tumor: % Stain 1 2+ Cells	0.0603318		Tumor: % Stain 1 2+ Cells	0.0817884
		Tumor: % Stain 1 3+ Cells	0.0677736		Tumor: % Stain 1 3+ Cells	0.0893921		Tumor: % Stain 1 3+ Cells	0.0795545		Tumor: % Stain 1 3+ Cells	0.0956328		Tumor: % Stain 1 3+ Cells	0.0193536		Tumor: % Stain 1 3+ Cells	0.035727		Tumor: % Stain 1 3+ Cells	0.0904977		Tumor: % Stain 1 3+ Cells	0.163577
[truncated: 262 more rows]
