# Supplementary material for: CYRI-B-mediated macropinocytosis drives metastasis via lysophosphatidic acid receptor uptake
Source: eLife journal article supplement (doi:10.7554/elife.83712), 2024-05-07
Supplement: fig2-figsupp1-data3 [file Figure 2- figure supplement 1- source data 3 Excel F.xlsx]

## Sheet: Sheet1
	BSNA41.2D	WT
	Layer 1			Layer 2			Layer 3			Layer 4			Layer 5			Layer 6			Layer 7			Layer 8
	Name	Value		Name	Value		Name	Value		Name	Value		Name	Value		Name	Value		Name	Value		Name	Value
	Classified Area (mm²)	0.79925		Classified Area (mm²)	0.55463		Classified Area (mm²)	0.51639		Classified Area (mm²)	0.74371		Classified Area (mm²)	0.5079		Classified Area (mm²)	0.83054		Classified Area (mm²)	0.62377		Classified Area (mm²)	0.94765
	tumour Area (mm²)	0.76965		tumour Area (mm²)	0.55463		tumour Area (mm²)	0.51618		tumour Area (mm²)	0.7424		tumour Area (mm²)	0.50646		tumour Area (mm²)	0.82562		tumour Area (mm²)	0.62324		tumour Area (mm²)	0.92927
	Necrosis Area (mm²)	0.00638		Necrosis Area (mm²)	0		Necrosis Area (mm²)	0		Necrosis Area (mm²)	0		Necrosis Area (mm²)	0		Necrosis Area (mm²)	0.0029		Necrosis Area (mm²)	0.00045		Necrosis Area (mm²)	0.0063
	Empty Area (mm²)	0.02323		Empty Area (mm²)	0		Empty Area (mm²)	0.00021		Empty Area (mm²)	0.00131		Empty Area (mm²)	0.00144		Empty Area (mm²)	0.00202		Empty Area (mm²)	8e-05		Empty Area (mm²)	0.01208
	Normal Area (mm²)	0		Normal Area (mm²)	0		Normal Area (mm²)	0		Normal Area (mm²)	0		Normal Area (mm²)	0		Normal Area (mm²)	0		Normal Area (mm²)	0		Normal Area (mm²)	0
	Tissue Area Analyzed (μm²)	750385		Tissue Area Analyzed (μm²)	553874		Tissue Area Analyzed (μm²)	514779		Tissue Area Analyzed (μm²)	737504		Tissue Area Analyzed (μm²)	503989		Tissue Area Analyzed (μm²)	818620		Tissue Area Analyzed (μm²)	614474		Tissue Area Analyzed (μm²)	915278
	nucleous Area (μm²)	310796		nucleous Area (μm²)	286736		nucleous Area (μm²)	269780		nucleous Area (μm²)	408523		nucleous Area (μm²)	261329		nucleous Area (μm²)	311132		nucleous Area (μm²)	227943		nucleous Area (μm²)	315145
	nucleous Weak Area (μm²)	120279		nucleous Weak Area (μm²)	106108		nucleous Weak Area (μm²)	93629.3		nucleous Weak Area (μm²)	139168		nucleous Weak Area (μm²)	91834.4		nucleous Weak Area (μm²)	123521		nucleous Weak Area (μm²)	86710.7		nucleous Weak Area (μm²)	123308
	nucleous Moderate Area (μm²)	80518.6		nucleous Moderate Area (μm²)	73652.9		nucleous Moderate Area (μm²)	66174.2		nucleous Moderate Area (μm²)	97403.7		nucleous Moderate Area (μm²)	61870.6		nucleous Moderate Area (μm²)	80770.3		nucleous Moderate Area (μm²)	55363.2		nucleous Moderate Area (μm²)	83812.8
	nucleous Strong Area (μm²)	109999		nucleous Strong Area (μm²)	106974		nucleous Strong Area (μm²)	109976		nucleous Strong Area (μm²)	171951		nucleous Strong Area (μm²)	107624		nucleous Strong Area (μm²)	106841		nucleous Strong Area (μm²)	85868.7		nucleous Strong Area (μm²)	108024
	cd31 Area (μm²)	13637.9		cd31 Area (μm²)	12790.6		cd31 Area (μm²)	12717.2		cd31 Area (μm²)	20362.9		cd31 Area (μm²)	13810		cd31 Area (μm²)	6262.73		cd31 Area (μm²)	6157.99		cd31 Area (μm²)	9686.45
	cd31 Weak Area (μm²)	4423.61		cd31 Weak Area (μm²)	5340.26		cd31 Weak Area (μm²)	4952.9		cd31 Weak Area (μm²)	7536.89		cd31 Weak Area (μm²)	4839.81		cd31 Weak Area (μm²)	1686.81		cd31 Weak Area (μm²)	1929.45		cd31 Weak Area (μm²)	2743.63
	cd31 Moderate Area (μm²)	4165.79		cd31 Moderate Area (μm²)	4244.23		cd31 Moderate Area (μm²)	4179.46		cd31 Moderate Area (μm²)	6814.54		cd31 Moderate Area (μm²)	4505.33		cd31 Moderate Area (μm²)	1770.05		cd31 Moderate Area (μm²)	1765.5		cd31 Moderate Area (μm²)	2806.63
	cd31 Strong Area (μm²)	5048.54		cd31 Strong Area (μm²)	3206.13		cd31 Strong Area (μm²)	3584.88		cd31 Strong Area (μm²)	6011.49		cd31 Strong Area (μm²)	4464.85		cd31 Strong Area (μm²)	2805.87		cd31 Strong Area (μm²)	2463.04		cd31 Strong Area (μm²)	4136.19
	% nucleous Positive Tissue	41.4183		% nucleous Positive Tissue	51.7691		% nucleous Positive Tissue	52.407		% nucleous Positive Tissue	55.3926		% nucleous Positive Tissue	51.8522		% nucleous Positive Tissue	38.0068		% nucleous Positive Tissue	37.0956		% nucleous Positive Tissue	34.4316
	% nucleous Positive Tissue (weak)	16.029		% nucleous Positive Tissue (weak)	19.1575		% nucleous Positive Tissue (weak)	18.1883		% nucleous Positive Tissue (weak)	18.8702		% nucleous Positive Tissue (weak)	18.2215		% nucleous Positive Tissue (weak)	15.0889		% nucleous Positive Tissue (weak)	14.1114		% nucleous Positive Tissue (weak)	13.4722
	% nucleous Positive Tissue (moderate)	10.7303		% nucleous Positive Tissue (moderate)	13.2978		% nucleous Positive Tissue (moderate)	12.8549		% nucleous Positive Tissue (moderate)	13.2072		% nucleous Positive Tissue (moderate)	12.2762		% nucleous Positive Tissue (moderate)	9.86664		% nucleous Positive Tissue (moderate)	9.00985		% nucleous Positive Tissue (moderate)	9.15709
	% nucleous Positive Tissue (strong)	14.659		% nucleous Positive Tissue (strong)	19.3139		% nucleous Positive Tissue (strong)	21.3638		% nucleous Positive Tissue (strong)	23.3153		% nucleous Positive Tissue (strong)	21.3545		% nucleous Positive Tissue (strong)	13.0513		% nucleous Positive Tissue (strong)	13.9743		% nucleous Positive Tissue (strong)	11.8024
	% cd31 Positive Tissue	1.81746		% cd31 Positive Tissue	2.3093		% cd31 Positive Tissue	2.47043		% cd31 Positive Tissue	2.76106		% cd31 Positive Tissue	2.74014		% cd31 Positive Tissue	0.765035		% cd31 Positive Tissue	1.00216		% cd31 Positive Tissue	1.05831
	% cd31 Positive Tissue (weak)	0.589512		% cd31 Positive Tissue (weak)	0.964165		% cd31 Positive Tissue (weak)	0.962142		% cd31 Positive Tissue (weak)	1.02195		% cd31 Positive Tissue (weak)	0.960301		% cd31 Positive Tissue (weak)	0.206055		% cd31 Positive Tissue (weak)	0.314		% cd31 Positive Tissue (weak)	0.299759
	% cd31 Positive Tissue (moderate)	0.555154		% cd31 Positive Tissue (moderate)	0.76628		% cd31 Positive Tissue (moderate)	0.811894		% cd31 Positive Tissue (moderate)	0.924001		% cd31 Positive Tissue (moderate)	0.893935		% cd31 Positive Tissue (moderate)	0.216224		% cd31 Positive Tissue (moderate)	0.287318		% cd31 Positive Tissue (moderate)	0.306642
	% cd31 Positive Tissue (strong)	0.672794		% cd31 Positive Tissue (strong)	0.578855		% cd31 Positive Tissue (strong)	0.696393		% cd31 Positive Tissue (strong)	0.815114		% cd31 Positive Tissue (strong)	0.885903		% cd31 Positive Tissue (strong)	0.342756		% cd31 Positive Tissue (strong)	0.400838		% cd31 Positive Tissue (strong)	0.451906
	nucleous Average Positive Optical Density	0.321766		nucleous Average Positive Optical Density	0.327314		nucleous Average Positive Optical Density	0.340636		nucleous Average Positive Optical Density	0.346463		nucleous Average Positive Optical Density	0.342885		nucleous Average Positive Optical Density	0.321182		nucleous Average Positive Optical Density	0.34192		nucleous Average Positive Optical Density	0.320416
	cd31 Average Positive Optical Density	0.628199		cd31 Average Positive Optical Density	0.567179		cd31 Average Positive Optical Density	0.578897		cd31 Average Positive Optical Density	0.588147		cd31 Average Positive Optical Density	0.600409		cd31 Average Positive Optical Density	0.676358		cd31 Average Positive Optical Density	0.643413		cd31 Average Positive Optical Density	0.65596
	% Negative Tissue	57.0729		% Negative Tissue	46.5276		% Negative Tissue	45.6812		% Negative Tissue	42.4		% Negative Tissue	45.9226		% Negative Tissue	61.396		% Negative Tissue	62.1587		% Negative Tissue	64.7127
	tumour: Tissue Area Analyzed (μm²)	750385		tumour: Tissue Area Analyzed (μm²)	553874		tumour: Tissue Area Analyzed (μm²)	514779		tumour: Tissue Area Analyzed (μm²)	737504		tumour: Tissue Area Analyzed (μm²)	503989		tumour: Tissue Area Analyzed (μm²)	818620		tumour: Tissue Area Analyzed (μm²)	614474		tumour: Tissue Area Analyzed (μm²)	915278
	tumour: nucleous Area (μm²)	310796		tumour: nucleous Area (μm²)	286736		tumour: nucleous Area (μm²)	269780		tumour: nucleous Area (μm²)	408523		tumour: nucleous Area (μm²)	261329		tumour: nucleous Area (μm²)	311132		tumour: nucleous Area (μm²)	227943		tumour: nucleous Area (μm²)	315145
	tumour: nucleous Weak Area (μm²)	120279		tumour: nucleous Weak Area (μm²)	106108		tumour: nucleous Weak Area (μm²)	93629.3		tumour: nucleous Weak Area (μm²)	139168		tumour: nucleous Weak Area (μm²)	91834.4		tumour: nucleous Weak Area (μm²)	123521		tumour: nucleous Weak Area (μm²)	86710.7		tumour: nucleous Weak Area (μm²)	123308
	tumour: nucleous Moderate Area (μm²)	80518.6		tumour: nucleous Moderate Area (μm²)	73652.9		tumour: nucleous Moderate Area (μm²)	66174.2		tumour: nucleous Moderate Area (μm²)	97403.7		tumour: nucleous Moderate Area (μm²)	61870.6		tumour: nucleous Moderate Area (μm²)	80770.3		tumour: nucleous Moderate Area (μm²)	55363.2		tumour: nucleous Moderate Area (μm²)	83812.8
	tumour: nucleous Strong Area (μm²)	109999		tumour: nucleous Strong Area (μm²)	106974		tumour: nucleous Strong Area (μm²)	109976		tumour: nucleous Strong Area (μm²)	171951		tumour: nucleous Strong Area (μm²)	107624		tumour: nucleous Strong Area (μm²)	106841		tumour: nucleous Strong Area (μm²)	85868.7		tumour: nucleous Strong Area (μm²)	108024
	tumour: cd31 Area (μm²)	13637.9		tumour: cd31 Area (μm²)	12790.6		tumour: cd31 Area (μm²)	12717.2		tumour: cd31 Area (μm²)	20362.9		tumour: cd31 Area (μm²)	13810		tumour: cd31 Area (μm²)	6262.73		tumour: cd31 Area (μm²)	6157.99		tumour: cd31 Area (μm²)	9686.45
	tumour: cd31 Weak Area (μm²)	4423.61		tumour: cd31 Weak Area (μm²)	5340.26		tumour: cd31 Weak Area (μm²)	4952.9		tumour: cd31 Weak Area (μm²)	7536.89		tumour: cd31 Weak Area (μm²)	4839.81		tumour: cd31 Weak Area (μm²)	1686.81		tumour: cd31 Weak Area (μm²)	1929.45		tumour: cd31 Weak Area (μm²)	2743.63
	tumour: cd31 Moderate Area (μm²)	4165.79		tumour: cd31 Moderate Area (μm²)	4244.23		tumour: cd31 Moderate Area (μm²)	4179.46		tumour: cd31 Moderate Area (μm²)	6814.54		tumour: cd31 Moderate Area (μm²)	4505.33		tumour: cd31 Moderate Area (μm²)	1770.05		tumour: cd31 Moderate Area (μm²)	1765.5		tumour: cd31 Moderate Area (μm²)	2806.63
	tumour: cd31 Strong Area (μm²)	5048.54		tumour: cd31 Strong Area (μm²)	3206.13		tumour: cd31 Strong Area (μm²)	3584.88		tumour: cd31 Strong Area (μm²)	6011.49		tumour: cd31 Strong Area (μm²)	4464.85		tumour: cd31 Strong Area (μm²)	2805.87		tumour: cd31 Strong Area (μm²)	2463.04		tumour: cd31 Strong Area (μm²)	4136.19
	tumour: % nucleous Positive Tissue	41.4183		tumour: % nucleous Positive Tissue	51.7691		tumour: % nucleous Positive Tissue	52.407		tumour: % nucleous Positive Tissue	55.3926		tumour: % nucleous Positive Tissue	51.8522		tumour: % nucleous Positive Tissue	38.0068		tumour: % nucleous Positive Tissue	37.0956		tumour: % nucleous Positive Tissue	34.4316
	tumour: % nucleous Positive Tissue (weak)	16.029		tumour: % nucleous Positive Tissue (weak)	19.1575		tumour: % nucleous Positive Tissue (weak)	18.1883		tumour: % nucleous Positive Tissue (weak)	18.8702		tumour: % nucleous Positive Tissue (weak)	18.2215		tumour: % nucleous Positive Tissue (weak)	15.0889		tumour: % nucleous Positive Tissue (weak)	14.1114		tumour: % nucleous Positive Tissue (weak)	13.4722
	tumour: % nucleous Positive Tissue (moderate)	10.7303		tumour: % nucleous Positive Tissue (moderate)	13.2978		tumour: % nucleous Positive Tissue (moderate)	12.8549		tumour: % nucleous Positive Tissue (moderate)	13.2072		tumour: % nucleous Positive Tissue (moderate)	12.2762		tumour: % nucleous Positive Tissue (moderate)	9.86664		tumour: % nucleous Positive Tissue (moderate)	9.00985		tumour: % nucleous Positive Tissue (moderate)	9.15709
	tumour: % nucleous Positive Tissue (strong)	14.659		tumour: % nucleous Positive Tissue (strong)	19.3139		tumour: % nucleous Positive Tissue (strong)	21.3638		tumour: % nucleous Positive Tissue (strong)	23.3153		tumour: % nucleous Positive Tissue (strong)	21.3545		tumour: % nucleous Positive Tissue (strong)	13.0513		tumour: % nucleous Positive Tissue (strong)	13.9743		tumour: % nucleous Positive Tissue (strong)	11.8024
	tumour: % cd31 Positive Tissue	1.81746		tumour: % cd31 Positive Tissue	2.3093		tumour: % cd31 Positive Tissue	2.47043		tumour: % cd31 Positive Tissue	2.76106		tumour: % cd31 Positive Tissue	2.74014		tumour: % cd31 Positive Tissue	0.765035		tumour: % cd31 Positive Tissue	1.00216		tumour: % cd31 Positive Tissue	1.05831		1.86549
	tumour: % cd31 Positive Tissue (weak)	0.589512		tumour: % cd31 Positive Tissue (weak)	0.964165		tumour: % cd31 Positive Tissue (weak)	0.962142		tumour: % cd31 Positive Tissue (weak)	1.02195		tumour: % cd31 Positive Tissue (weak)	0.960301		tumour: % cd31 Positive Tissue (weak)	0.206055		tumour: % cd31 Positive Tissue (weak)	0.314		tumour: % cd31 Positive Tissue (weak)	0.299759
	tumour: % cd31 Positive Tissue (moderate)	0.555154		tumour: % cd31 Positive Tissue (moderate)	0.76628		tumour: % cd31 Positive Tissue (moderate)	0.811894		tumour: % cd31 Positive Tissue (moderate)	0.924001		tumour: % cd31 Positive Tissue (moderate)	0.893935		tumour: % cd31 Positive Tissue (moderate)	0.216224		tumour: % cd31 Positive Tissue (moderate)	0.287318		tumour: % cd31 Positive Tissue (moderate)	0.306642
	tumour: % cd31 Positive Tissue (strong)	0.672794		tumour: % cd31 Positive Tissue (strong)	0.578855		tumour: % cd31 Positive Tissue (strong)	0.696393		tumour: % cd31 Positive Tissue (strong)	0.815114		tumour: % cd31 Positive Tissue (strong)	0.885903		tumour: % cd31 Positive Tissue (strong)	0.342756		tumour: % cd31 Positive Tissue (strong)	0.400838		tumour: % cd31 Positive Tissue (strong)	0.451906
	tumour: nucleous Average Positive Optical Density	0.321766		tumour: nucleous Average Positive Optical Density	0.327314		tumour: nucleous Average Positive Optical Density	0.340636		tumour: nucleous Average Positive Optical Density	0.346463		tumour: nucleous Average Positive Optical Density	0.342885		tumour: nucleous Average Positive Optical Density	0.321182		tumour: nucleous Average Positive Optical Density	0.34192		tumour: nucleous Average Positive Optical Density	0.320416
	tumour: cd31 Average Positive Optical Density	0.628199		tumour: cd31 Average Positive Optical Density	0.567179		tumour: cd31 Average Positive Optical Density	0.578897		tumour: cd31 Average Positive Optical Density	0.588147		tumour: cd31 Average Positive Optical Density	0.600409		tumour: cd31 Average Positive Optical Density	0.676358		tumour: cd31 Average Positive Optical Density	0.643413		tumour: cd31 Average Positive Optical Density	0.65596
	tumour: % Negative Tissue	57.0729		tumour: % Negative Tissue	46.5276		tumour: % Negative Tissue	45.6812		tumour: % Negative Tissue	42.4		tumour: % Negative Tissue	45.9226		tumour: % Negative Tissue	61.396		tumour: % Negative Tissue	62.1587		tumour: % Negative Tissue	64.7127
	BSNA35.1a	WT
	Name	Value		Name	Value		Name	Value		Name	Value		Name	Value		Name	Value		Name	Value		Name	Value
	Classified Area (mm²)	1.15315		Classified Area (mm²)	0.48446		Classified Area (mm²)	0.99092		Classified Area (mm²)	1.03321		Classified Area (mm²)	0.83846		Classified Area (mm²)	0.49662		Classified Area (mm²)	0.60232		Classified Area (mm²)	0.56086
	tumour Area (mm²)	1.15296		tumour Area (mm²)	0.48446		tumour Area (mm²)	0.99085		tumour Area (mm²)	1.03319		tumour Area (mm²)	0.83846		tumour Area (mm²)	0.49657		tumour Area (mm²)	0.60232		tumour Area (mm²)	0.56086
	Necrosis Area (mm²)	0		Necrosis Area (mm²)	0		Necrosis Area (mm²)	0		Necrosis Area (mm²)	0		Necrosis Area (mm²)	0		Necrosis Area (mm²)	0		Necrosis Area (mm²)	0		Necrosis Area (mm²)	0
	Empty Area (mm²)	0.00019		Empty Area (mm²)	0		Empty Area (mm²)	0		Empty Area (mm²)	2e-05		Empty Area (mm²)	0		Empty Area (mm²)	5e-05		Empty Area (mm²)	0		Empty Area (mm²)	0
	Normal Area (mm²)	0		Normal Area (mm²)	0		Normal Area (mm²)	6e-05		Normal Area (mm²)	0		Normal Area (mm²)	0		Normal Area (mm²)	0		Normal Area (mm²)	0		Normal Area (mm²)	0
	Tissue Area Analyzed (μm²)	1.15188e+06		Tissue Area Analyzed (μm²)	482430		Tissue Area Analyzed (μm²)	989779		Tissue Area Analyzed (μm²)	1.03169e+06		Tissue Area Analyzed (μm²)	837322		Tissue Area Analyzed (μm²)	496270		Tissue Area Analyzed (μm²)	601360		Tissue Area Analyzed (μm²)	559711
	nucleous Area (μm²)	485326		nucleous Area (μm²)	215586		nucleous Area (μm²)	509926		nucleous Area (μm²)	528542		nucleous Area (μm²)	430832		nucleous Area (μm²)	270197		nucleous Area (μm²)	319482		nucleous Area (μm²)	350102
	nucleous Weak Area (μm²)	170780		nucleous Weak Area (μm²)	76534		nucleous Weak Area (μm²)	195626		nucleous Weak Area (μm²)	211244		nucleous Weak Area (μm²)	177358		nucleous Weak Area (μm²)	101416		nucleous Weak Area (μm²)	125338		nucleous Weak Area (μm²)	113600
	nucleous Moderate Area (μm²)	94512.3		nucleous Moderate Area (μm²)	40263.1		nucleous Moderate Area (μm²)	96351.6		nucleous Moderate Area (μm²)	103696		nucleous Moderate Area (μm²)	79551.9		nucleous Moderate Area (μm²)	53134.9		nucleous Moderate Area (μm²)	60258.6		nucleous Moderate Area (μm²)	64464.9
	nucleous Strong Area (μm²)	220034		nucleous Strong Area (μm²)	98789.1		nucleous Strong Area (μm²)	217949		nucleous Strong Area (μm²)	213603		nucleous Strong Area (μm²)	173923		nucleous Strong Area (μm²)	115647		nucleous Strong Area (μm²)	133886		nucleous Strong Area (μm²)	172037
	cd31 Area (μm²)	16920.7		cd31 Area (μm²)	6512.7		cd31 Area (μm²)	5419.96		cd31 Area (μm²)	11979.5		cd31 Area (μm²)	6736.87		cd31 Area (μm²)	6939.28		cd31 Area (μm²)	7216.83		cd31 Area (μm²)	5853.62
	cd31 Weak Area (μm²)	6648.82		cd31 Weak Area (μm²)	2607		cd31 Weak Area (μm²)	2409.66		cd31 Weak Area (μm²)	4767.95		cd31 Weak Area (μm²)	2876.46		cd31 Weak Area (μm²)	2840.03		cd31 Weak Area (μm²)	2628.76		cd31 Weak Area (μm²)	2418.01
	cd31 Moderate Area (μm²)	5441.97		cd31 Moderate Area (μm²)	2089.6		cd31 Moderate Area (μm²)	1823.44		cd31 Moderate Area (μm²)	3944.16		cd31 Moderate Area (μm²)	2177.4		cd31 Moderate Area (μm²)	2284.67		cd31 Moderate Area (μm²)	2255.83		cd31 Moderate Area (μm²)	1942.6
	cd31 Strong Area (μm²)	4829.94		cd31 Strong Area (μm²)	1816.1		cd31 Strong Area (μm²)	1186.87		cd31 Strong Area (μm²)	3267.36		cd31 Strong Area (μm²)	1683.02		cd31 Strong Area (μm²)	1814.58		cd31 Strong Area (μm²)	2332.24		cd31 Strong Area (μm²)	1493.01
	% nucleous Positive Tissue	42.1333		% nucleous Positive Tissue	44.6876		% nucleous Positive Tissue	51.5192		% nucleous Positive Tissue	51.2306		% nucleous Positive Tissue	51.4536		% nucleous Positive Tissue	54.4456		% nucleous Positive Tissue	53.1266		% nucleous Positive Tissue	62.5505
	% nucleous Positive Tissue (weak)	14.8261		% nucleous Positive Tissue (weak)	15.8643		% nucleous Positive Tissue (weak)	19.7646		% nucleous Positive Tissue (weak)	20.4755		% nucleous Positive Tissue (weak)	21.1815		% nucleous Positive Tissue (weak)	20.4356		% nucleous Positive Tissue (weak)	20.8424		% nucleous Positive Tissue (weak)	20.2962
	% nucleous Positive Tissue (moderate)	8.20501		% nucleous Positive Tissue (moderate)	8.3459		% nucleous Positive Tissue (moderate)	9.73466		% nucleous Positive Tissue (moderate)	10.051		% nucleous Positive Tissue (moderate)	9.50075		% nucleous Positive Tissue (moderate)	10.7069		% nucleous Positive Tissue (moderate)	10.0204		% nucleous Positive Tissue (moderate)	11.5175
	% nucleous Positive Tissue (strong)	19.1021		% nucleous Positive Tissue (strong)	20.4774		% nucleous Positive Tissue (strong)	22.0199		% nucleous Positive Tissue (strong)	20.7041		% nucleous Positive Tissue (strong)	20.7713		% nucleous Positive Tissue (strong)	23.3031		% nucleous Positive Tissue (strong)	22.2638		% nucleous Positive Tissue (strong)	30.7368
	% cd31 Positive Tissue	1.46896		% cd31 Positive Tissue	1.34998		% cd31 Positive Tissue	0.547593		% cd31 Positive Tissue	1.16115		% cd31 Positive Tissue	0.804573		% cd31 Positive Tissue	1.39829		% cd31 Positive Tissue	1.20008		% cd31 Positive Tissue	1.04583
	% cd31 Positive Tissue (weak)	0.577213		% cd31 Positive Tissue (weak)	0.540391		% cd31 Positive Tissue (weak)	0.243454		% cd31 Positive Tissue (weak)	0.46215		% cd31 Positive Tissue (weak)	0.343531		% cd31 Positive Tissue (weak)	0.572274		% cd31 Positive Tissue (weak)	0.437136		% cd31 Positive Tissue (weak)	0.43201
	% cd31 Positive Tissue (moderate)	0.472441		% cd31 Positive Tissue (moderate)	0.433141		% cd31 Positive Tissue (moderate)	0.184227		% cd31 Positive Tissue (moderate)	0.3823		% cd31 Positive Tissue (moderate)	0.260043		% cd31 Positive Tissue (moderate)	0.460368		% cd31 Positive Tissue (moderate)	0.375121		% cd31 Positive Tissue (moderate)	0.347072
	% cd31 Positive Tissue (strong)	0.419308		% cd31 Positive Tissue (strong)	0.376448		% cd31 Positive Tissue (strong)	0.119912		% cd31 Positive Tissue (strong)	0.316699		% cd31 Positive Tissue (strong)	0.201		% cd31 Positive Tissue (strong)	0.365644		% cd31 Positive Tissue (strong)	0.387827		% cd31 Positive Tissue (strong)	0.266746
	nucleous Average Positive Optical Density	0.379063		nucleous Average Positive Optical Density	0.386225		nucleous Average Positive Optical Density	0.37031		nucleous Average Positive Optical Density	0.35422		nucleous Average Positive Optical Density	0.354827		nucleous Average Positive Optical Density	0.366046		nucleous Average Positive Optical Density	0.364353		nucleous Average Positive Optical Density	0.411104
	cd31 Average Positive Optical Density	0.587155		cd31 Average Positive Optical Density	0.57951		cd31 Average Positive Optical Density	0.553521		cd31 Average Positive Optical Density	0.577966		cd31 Average Positive Optical Density	0.568107		cd31 Average Positive Optical Density	0.571814		cd31 Average Positive Optical Density	0.604718		cd31 Average Positive Optical Density	0.568936
	% Negative Tissue	56.7152		% Negative Tissue	54.2864		% Negative Tissue	48.083		% Negative Tissue	48.0052		% Negative Tissue	47.9976		% Negative Tissue	44.6146		% Negative Tissue	45.9694		% Negative Tissue	36.643
	tumour: Tissue Area Analyzed (μm²)	1.15188e+06		tumour: Tissue Area Analyzed (μm²)	482430		tumour: Tissue Area Analyzed (μm²)	989779		tumour: Tissue Area Analyzed (μm²)	1.03169e+06		tumour: Tissue Area Analyzed (μm²)	837322		tumour: Tissue Area Analyzed (μm²)	496270		tumour: Tissue Area Analyzed (μm²)	601360		tumour: Tissue Area Analyzed (μm²)	559711
	tumour: nucleous Area (μm²)	485326		tumour: nucleous Area (μm²)	215586		tumour: nucleous Area (μm²)	509926		tumour: nucleous Area (μm²)	528542		tumour: nucleous Area (μm²)	430832		tumour: nucleous Area (μm²)	270197		tumour: nucleous Area (μm²)	319482		tumour: nucleous Area (μm²)	350102
	tumour: nucleous Weak Area (μm²)	170780		tumour: nucleous Weak Area (μm²)	76534		tumour: nucleous Weak Area (μm²)	195626		tumour: nucleous Weak Area (μm²)	211244		tumour: nucleous Weak Area (μm²)	177358		tumour: nucleous Weak Area (μm²)	101416		tumour: nucleous Weak Area (μm²)	125338		tumour: nucleous Weak Area (μm²)	113600
	tumour: nucleous Moderate Area (μm²)	94512.3		tumour: nucleous Moderate Area (μm²)	40263.1		tumour: nucleous Moderate Area (μm²)	96351.6		tumour: nucleous Moderate Area (μm²)	103696		tumour: nucleous Moderate Area (μm²)	79551.9		tumour: nucleous Moderate Area (μm²)	53134.9		tumour: nucleous Moderate Area (μm²)	60258.6		tumour: nucleous Moderate Area (μm²)	64464.9
	tumour: nucleous Strong Area (μm²)	220034		tumour: nucleous Strong Area (μm²)	98789.1		tumour: nucleous Strong Area (μm²)	217949		tumour: nucleous Strong Area (μm²)	213603		tumour: nucleous Strong Area (μm²)	173923		tumour: nucleous Strong Area (μm²)	115647		tumour: nucleous Strong Area (μm²)	133886		tumour: nucleous Strong Area (μm²)	172037
	tumour: cd31 Area (μm²)	16920.7		tumour: cd31 Area (μm²)	6512.7		tumour: cd31 Area (μm²)	5419.96		tumour: cd31 Area (μm²)	11979.5		tumour: cd31 Area (μm²)	6736.87		tumour: cd31 Area (μm²)	6939.28		tumour: cd31 Area (μm²)	7216.83		tumour: cd31 Area (μm²)	5853.62
	tumour: cd31 Weak Area (μm²)	6648.82		tumour: cd31 Weak Area (μm²)	2607		tumour: cd31 Weak Area (μm²)	2409.66		tumour: cd31 Weak Area (μm²)	4767.95		tumour: cd31 Weak Area (μm²)	2876.46		tumour: cd31 Weak Area (μm²)	2840.03		tumour: cd31 Weak Area (μm²)	2628.76		tumour: cd31 Weak Area (μm²)	2418.01
	tumour: cd31 Moderate Area (μm²)	5441.97		tumour: cd31 Moderate Area (μm²)	2089.6		tumour: cd31 Moderate Area (μm²)	1823.44		tumour: cd31 Moderate Area (μm²)	3944.16		tumour: cd31 Moderate Area (μm²)	2177.4		tumour: cd31 Moderate Area (μm²)	2284.67		tumour: cd31 Moderate Area (μm²)	2255.83		tumour: cd31 Moderate Area (μm²)	1942.6
	tumour: cd31 Strong Area (μm²)	4829.94		tumour: cd31 Strong Area (μm²)	1816.1		tumour: cd31 Strong Area (μm²)	1186.87		tumour: cd31 Strong Area (μm²)	3267.36		tumour: cd31 Strong Area (μm²)	1683.02		tumour: cd31 Strong Area (μm²)	1814.58		tumour: cd31 Strong Area (μm²)	2332.24		tumour: cd31 Strong Area (μm²)	1493.01
	tumour: % nucleous Positive Tissue	42.1333		tumour: % nucleous Positive Tissue	44.6876		tumour: % nucleous Positive Tissue	51.5192		tumour: % nucleous Positive Tissue	51.2306		tumour: % nucleous Positive Tissue	51.4536		tumour: % nucleous Positive Tissue	54.4456		tumour: % nucleous Positive Tissue	53.1266		tumour: % nucleous Positive Tissue	62.5505
	tumour: % nucleous Positive Tissue (weak)	14.8261		tumour: % nucleous Positive Tissue (weak)	15.8643		tumour: % nucleous Positive Tissue (weak)	19.7646		tumour: % nucleous Positive Tissue (weak)	20.4755		tumour: % nucleous Positive Tissue (weak)	21.1815		tumour: % nucleous Positive Tissue (weak)	20.4356		tumour: % nucleous Positive Tissue (weak)	20.8424		tumour: % nucleous Positive Tissue (weak)	20.2962
	tumour: % nucleous Positive Tissue (moderate)	8.20501		tumour: % nucleous Positive Tissue (moderate)	8.3459		tumour: % nucleous Positive Tissue (moderate)	9.73466		tumour: % nucleous Positive Tissue (moderate)	10.051		tumour: % nucleous Positive Tissue (moderate)	9.50075		tumour: % nucleous Positive Tissue (moderate)	10.7069		tumour: % nucleous Positive Tissue (moderate)	10.0204		tumour: % nucleous Positive Tissue (moderate)	11.5175
	tumour: % nucleous Positive Tissue (strong)	19.1021		tumour: % nucleous Positive Tissue (strong)	20.4774		tumour: % nucleous Positive Tissue (strong)	22.0199		tumour: % nucleous Positive Tissue (strong)	20.7041		tumour: % nucleous Positive Tissue (strong)	20.7713		tumour: % nucleous Positive Tissue (strong)	23.3031		tumour: % nucleous Positive Tissue (strong)	22.2638		tumour: % nucleous Positive Tissue (strong)	30.7368
	tumour: % cd31 Positive Tissue	1.46896		tumour: % cd31 Positive Tissue	1.34998		tumour: % cd31 Positive Tissue	0.547593		tumour: % cd31 Positive Tissue	1.16115		tumour: % cd31 Positive Tissue	0.804573		tumour: % cd31 Positive Tissue	1.39829		tumour: % cd31 Positive Tissue	1.20008		tumour: % cd31 Positive Tissue	1.04583		1.12206
	tumour: % cd31 Positive Tissue (weak)	0.577213		tumour: % cd31 Positive Tissue (weak)	0.540391		tumour: % cd31 Positive Tissue (weak)	0.243454		tumour: % cd31 Positive Tissue (weak)	0.46215		tumour: % cd31 Positive Tissue (weak)	0.343531		tumour: % cd31 Positive Tissue (weak)	0.572274		tumour: % cd31 Positive Tissue (weak)	0.437136		tumour: % cd31 Positive Tissue (weak)	0.43201
	tumour: % cd31 Positive Tissue (moderate)	0.472441		tumour: % cd31 Positive Tissue (moderate)	0.433141		tumour: % cd31 Positive Tissue (moderate)	0.184227		tumour: % cd31 Positive Tissue (moderate)	0.3823		tumour: % cd31 Positive Tissue (moderate)	0.260043		tumour: % cd31 Positive Tissue (moderate)	0.460368		tumour: % cd31 Positive Tissue (moderate)	0.375121		tumour: % cd31 Positive Tissue (moderate)	0.347072
	tumour: % cd31 Positive Tissue (strong)	0.419308		tumour: % cd31 Positive Tissue (strong)	0.376448		tumour: % cd31 Positive Tissue (strong)	0.119912		tumour: % cd31 Positive Tissue (strong)	0.316699		tumour: % cd31 Positive Tissue (strong)	0.201		tumour: % cd31 Positive Tissue (strong)	0.365644		tumour: % cd31 Positive Tissue (strong)	0.387827		tumour: % cd31 Positive Tissue (strong)	0.266746
	tumour: nucleous Average Positive Optical Density	0.379063		tumour: nucleous Average Positive Optical Density	0.386225		tumour: nucleous Average Positive Optical Density	0.37031		tumour: nucleous Average Positive Optical Density	0.35422		tumour: nucleous Average Positive Optical Density	0.354827		tumour: nucleous Average Positive Optical Density	0.366046		tumour: nucleous Average Positive Optical Density	0.364353		tumour: nucleous Average Positive Optical Density	0.411104
	tumour: cd31 Average Positive Optical Density	0.587155		tumour: cd31 Average Positive Optical Density	0.57951		tumour: cd31 Average Positive Optical Density	0.553521		tumour: cd31 Average Positive Optical Density	0.577966		tumour: cd31 Average Positive Optical Density	0.568107		tumour: cd31 Average Positive Optical Density	0.571814		tumour: cd31 Average Positive Optical Density	0.604718		tumour: cd31 Average Positive Optical Density	0.568936
	tumour: % Negative Tissue	56.7152		tumour: % Negative Tissue	54.2864		tumour: % Negative Tissue	48.083		tumour: % Negative Tissue	48.0052		tumour: % Negative Tissue	47.9976		tumour: % Negative Tissue	44.6146		tumour: % Negative Tissue	45.9694		tumour: % Negative Tissue	36.643
	BSNA39.1c	WT
	Name	Value		Name	Value		Name	Value		Name	Value		Name	Value		Name	Value		Name	Value		Name	Value
	Classified Area (mm²)	0.55269		Classified Area (mm²)	0.44898		Classified Area (mm²)	0.4513		Classified Area (mm²)	0.55166		Classified Area (mm²)	0.64229		Classified Area (mm²)	0.66467		Classified Area (mm²)	0.7919		Classified Area (mm²)	0.59956
	tumour Area (mm²)	0.54984		tumour Area (mm²)	0.44864		tumour Area (mm²)	0.4493		tumour Area (mm²)	0.54631		tumour Area (mm²)	0.59479		tumour Area (mm²)	0.65799		tumour Area (mm²)	0.78926		tumour Area (mm²)	0.59856
	Necrosis Area (mm²)	0		Necrosis Area (mm²)	0.00022		Necrosis Area (mm²)	0		Necrosis Area (mm²)	0		Necrosis Area (mm²)	0		Necrosis Area (mm²)	0		Necrosis Area (mm²)	0		Necrosis Area (mm²)	0
	Empty Area (mm²)	0.00274		Empty Area (mm²)	0.00011		Empty Area (mm²)	0.002		Empty Area (mm²)	0.00535		Empty Area (mm²)	0.04731		Empty Area (mm²)	0.00662		Empty Area (mm²)	0.00264		Empty Area (mm²)	0.00099
	Normal Area (mm²)	0.00011		Normal Area (mm²)	0		Normal Area (mm²)	0		Normal Area (mm²)	0		Normal Area (mm²)	0.00019		Normal Area (mm²)	6e-05		Normal Area (mm²)	0		Normal Area (mm²)	2e-05
	Tissue Area Analyzed (μm²)	538681		Tissue Area Analyzed (μm²)	434020		Tissue Area Analyzed (μm²)	444419		Tissue Area Analyzed (μm²)	539499		Tissue Area Analyzed (μm²)	578540		Tissue Area Analyzed (μm²)	639234		Tissue Area Analyzed (μm²)	786719		Tissue Area Analyzed (μm²)	594634
	nucleous Area (μm²)	263867		nucleous Area (μm²)	213965		nucleous Area (μm²)	210245		nucleous Area (μm²)	266123		nucleous Area (μm²)	275073		nucleous Area (μm²)	289427		nucleous Area (μm²)	381233		nucleous Area (μm²)	286177
	nucleous Weak Area (μm²)	94644.3		nucleous Weak Area (μm²)	65587.5		nucleous Weak Area (μm²)	69167.1		nucleous Weak Area (μm²)	93148.8		nucleous Weak Area (μm²)	94485.5		nucleous Weak Area (μm²)	96268.9		nucleous Weak Area (μm²)	134180		nucleous Weak Area (μm²)	102753
	nucleous Moderate Area (μm²)	58156.6		nucleous Moderate Area (μm²)	46268		nucleous Moderate Area (μm²)	44968.6		nucleous Moderate Area (μm²)	60553.7		nucleous Moderate Area (μm²)	62027.2		nucleous Moderate Area (μm²)	63865.5		nucleous Moderate Area (μm²)	90110.7		nucleous Moderate Area (μm²)	66075.6
	nucleous Strong Area (μm²)	111066		nucleous Strong Area (μm²)	102110		nucleous Strong Area (μm²)	96109.3		nucleous Strong Area (μm²)	112420		nucleous Strong Area (μm²)	118560		nucleous Strong Area (μm²)	129293		nucleous Strong Area (μm²)	156943		nucleous Strong Area (μm²)	117348
	cd31 Area (μm²)	8561.57		cd31 Area (μm²)	6522.57		cd31 Area (μm²)	7093.11		cd31 Area (μm²)	9310.23		cd31 Area (μm²)	9746.41		cd31 Area (μm²)	12162.6		cd31 Area (μm²)	12521.2		cd31 Area (μm²)	8422.16
	cd31 Weak Area (μm²)	2631.29		cd31 Weak Area (μm²)	1961.07		cd31 Weak Area (μm²)	1829.51		cd31 Weak Area (μm²)	2556.91		cd31 Weak Area (μm²)	2501.75		cd31 Weak Area (μm²)	3249.9		cd31 Weak Area (μm²)	4258.9		cd31 Weak Area (μm²)	2787.15
	cd31 Moderate Area (μm²)	2562.48		cd31 Moderate Area (μm²)	1941.59		cd31 Moderate Area (μm²)	1830.77		cd31 Moderate Area (μm²)	2633.06		cd31 Moderate Area (μm²)	2534.64		cd31 Moderate Area (μm²)	3287.35		cd31 Moderate Area (μm²)	3895.07		cd31 Moderate Area (μm²)	2678.35
	cd31 Strong Area (μm²)	3367.8		cd31 Strong Area (μm²)	2619.91		cd31 Strong Area (μm²)	3432.83		cd31 Strong Area (μm²)	4120.25		cd31 Strong Area (μm²)	4710.02		cd31 Strong Area (μm²)	5625.4		cd31 Strong Area (μm²)	4367.19		cd31 Strong Area (μm²)	2956.66
	% nucleous Positive Tissue	48.984		% nucleous Positive Tissue	49.2984		% nucleous Positive Tissue	47.3078		% nucleous Positive Tissue	49.3278		% nucleous Positive Tissue	47.546		% nucleous Positive Tissue	45.2772		% nucleous Positive Tissue	48.4587		% nucleous Positive Tissue	48.1266
	% nucleous Positive Tissue (weak)	17.5697		% nucleous Positive Tissue (weak)	15.1116		% nucleous Positive Tissue (weak)	15.5635		% nucleous Positive Tissue (weak)	17.2658		% nucleous Positive Tissue (weak)	16.3317		% nucleous Positive Tissue (weak)	15.06		% nucleous Positive Tissue (weak)	17.0556		% nucleous Positive Tissue (weak)	17.2801
	% nucleous Positive Tissue (moderate)	10.7961		% nucleous Positive Tissue (moderate)	10.6603		% nucleous Positive Tissue (moderate)	10.1185		% nucleous Positive Tissue (moderate)	11.2241		% nucleous Positive Tissue (moderate)	10.7213		% nucleous Positive Tissue (moderate)	9.99095		% nucleous Positive Tissue (moderate)	11.454		% nucleous Positive Tissue (moderate)	11.112
	% nucleous Positive Tissue (strong)	20.6182		% nucleous Positive Tissue (strong)	23.5265		% nucleous Positive Tissue (strong)	21.6258		% nucleous Positive Tissue (strong)	20.8379		% nucleous Positive Tissue (strong)	20.493		% nucleous Positive Tissue (strong)	20.2262		% nucleous Positive Tissue (strong)	19.9491		% nucleous Positive Tissue (strong)	19.7345
	% cd31 Positive Tissue	1.58936		% cd31 Positive Tissue	1.50283		% cd31 Positive Tissue	1.59604		% cd31 Positive Tissue	1.72572		% cd31 Positive Tissue	1.68466		% cd31 Positive Tissue	1.90269		% cd31 Positive Tissue	1.59157		% cd31 Positive Tissue	1.41636
	% cd31 Positive Tissue (weak)	0.48847		% cd31 Positive Tissue (weak)	0.451839		% cd31 Positive Tissue (weak)	0.411663		% cd31 Positive Tissue (weak)	0.473941		% cd31 Positive Tissue (weak)	0.432425		% cd31 Positive Tissue (weak)	0.508405		% cd31 Positive Tissue (weak)	0.54135		% cd31 Positive Tissue (weak)	0.468717
	% cd31 Positive Tissue (moderate)	0.475695		% cd31 Positive Tissue (moderate)	0.44735		% cd31 Positive Tissue (moderate)	0.411948		% cd31 Positive Tissue (moderate)	0.488057		% cd31 Positive Tissue (moderate)	0.43811		% cd31 Positive Tissue (moderate)	0.514263		% cd31 Positive Tissue (moderate)	0.495103		% cd31 Positive Tissue (moderate)	0.450421
	% cd31 Positive Tissue (strong)	0.625195		% cd31 Positive Tissue (strong)	0.603637		% cd31 Positive Tissue (strong)	0.77243		% cd31 Positive Tissue (strong)	0.763718		% cd31 Positive Tissue (strong)	0.81412		% cd31 Positive Tissue (strong)	0.880022		% cd31 Positive Tissue (strong)	0.555114		% cd31 Positive Tissue (strong)	0.497224
	nucleous Average Positive Optical Density	0.35487		nucleous Average Positive Optical Density	0.384216		nucleous Average Positive Optical Density	0.376264		nucleous Average Positive Optical Density	0.355723		nucleous Average Positive Optical Density	0.356651		nucleous Average Positive Optical Density	0.368193		nucleous Average Positive Optical Density	0.349791		nucleous Average Positive Optical Density	0.347838
	cd31 Average Positive Optical Density	0.639356		cd31 Average Positive Optical Density	0.640165		cd31 Average Positive Optical Density	0.711669		cd31 Average Positive Optical Density	0.671695		cd31 Average Positive Optical Density	0.7073		cd31 Average Positive Optical Density	0.69117		cd31 Average Positive Optical Density	0.620576		cd31 Average Positive Optical Density	0.616199
	% Negative Tissue	49.9174		% Negative Tissue	49.5719		% Negative Tissue	51.5114		% Negative Tissue	49.4198		% Negative Tissue	51.2668		% Negative Tissue	53.4172		% Negative Tissue	50.348		% Negative Tissue	50.7957
	tumour: Tissue Area Analyzed (μm²)	538681		tumour: Tissue Area Analyzed (μm²)	434020		tumour: Tissue Area Analyzed (μm²)	444419		tumour: Tissue Area Analyzed (μm²)	539499		tumour: Tissue Area Analyzed (μm²)	578540		tumour: Tissue Area Analyzed (μm²)	639234		tumour: Tissue Area Analyzed (μm²)	786719		tumour: Tissue Area Analyzed (μm²)	594634
	tumour: nucleous Area (μm²)	263867		tumour: nucleous Area (μm²)	213965		tumour: nucleous Area (μm²)	210245		tumour: nucleous Area (μm²)	266123		tumour: nucleous Area (μm²)	275073		tumour: nucleous Area (μm²)	289427		tumour: nucleous Area (μm²)	381233		tumour: nucleous Area (μm²)	286177
	tumour: nucleous Weak Area (μm²)	94644.3		tumour: nucleous Weak Area (μm²)	65587.5		tumour: nucleous Weak Area (μm²)	69167.1		tumour: nucleous Weak Area (μm²)	93148.8		tumour: nucleous Weak Area (μm²)	94485.5		tumour: nucleous Weak Area (μm²)	96268.9		tumour: nucleous Weak Area (μm²)	134180		tumour: nucleous Weak Area (μm²)	102753
	tumour: nucleous Moderate Area (μm²)	58156.6		tumour: nucleous Moderate Area (μm²)	46268		tumour: nucleous Moderate Area (μm²)	44968.6		tumour: nucleous Moderate Area (μm²)	60553.7		tumour: nucleous Moderate Area (μm²)	62027.2		tumour: nucleous Moderate Area (μm²)	63865.5		tumour: nucleous Moderate Area (μm²)	90110.7		tumour: nucleous Moderate Area (μm²)	66075.6
	tumour: nucleous Strong Area (μm²)	111066		tumour: nucleous Strong Area (μm²)	102110		tumour: nucleous Strong Area (μm²)	96109.3		tumour: nucleous Strong Area (μm²)	112420		tumour: nucleous Strong Area (μm²)	118560		tumour: nucleous Strong Area (μm²)	129293		tumour: nucleous Strong Area (μm²)	156943		tumour: nucleous Strong Area (μm²)	117348
	tumour: cd31 Area (μm²)	8561.57		tumour: cd31 Area (μm²)	6522.57		tumour: cd31 Area (μm²)	7093.11		tumour: cd31 Area (μm²)	9310.23		tumour: cd31 Area (μm²)	9746.41		tumour: cd31 Area (μm²)	12162.6		tumour: cd31 Area (μm²)	12521.2		tumour: cd31 Area (μm²)	8422.16
	tumour: cd31 Weak Area (μm²)	2631.29		tumour: cd31 Weak Area (μm²)	1961.07		tumour: cd31 Weak Area (μm²)	1829.51		tumour: cd31 Weak Area (μm²)	2556.91		tumour: cd31 Weak Area (μm²)	2501.75		tumour: cd31 Weak Area (μm²)	3249.9		tumour: cd31 Weak Area (μm²)	4258.9		tumour: cd31 Weak Area (μm²)	2787.15
	tumour: cd31 Moderate Area (μm²)	2562.48		tumour: cd31 Moderate Area (μm²)	1941.59		tumour: cd31 Moderate Area (μm²)	1830.77		tumour: cd31 Moderate Area (μm²)	2633.06		tumour: cd31 Moderate Area (μm²)	2534.64		tumour: cd31 Moderate Area (μm²)	3287.35		tumour: cd31 Moderate Area (μm²)	3895.07		tumour: cd31 Moderate Area (μm²)	2678.35
	tumour: cd31 Strong Area (μm²)	3367.8		tumour: cd31 Strong Area (μm²)	2619.91		tumour: cd31 Strong Area (μm²)	3432.83		tumour: cd31 Strong Area (μm²)	4120.25		tumour: cd31 Strong Area (μm²)	4710.02		tumour: cd31 Strong Area (μm²)	5625.4		tumour: cd31 Strong Area (μm²)	4367.19		tumour: cd31 Strong Area (μm²)	2956.66
	tumour: % nucleous Positive Tissue	48.984		tumour: % nucleous Positive Tissue	49.2984		tumour: % nucleous Positive Tissue	47.3078		tumour: % nucleous Positive Tissue	49.3278		tumour: % nucleous Positive Tissue	47.546		tumour: % nucleous Positive Tissue	45.2772		tumour: % nucleous Positive Tissue	48.4587		tumour: % nucleous Positive Tissue	48.1266
	tumour: % nucleous Positive Tissue (weak)	17.5697		tumour: % nucleous Positive Tissue (weak)	15.1116		tumour: % nucleous Positive Tissue (weak)	15.5635		tumour: % nucleous Positive Tissue (weak)	17.2658		tumour: % nucleous Positive Tissue (weak)	16.3317		tumour: % nucleous Positive Tissue (weak)	15.06		tumour: % nucleous Positive Tissue (weak)	17.0556		tumour: % nucleous Positive Tissue (weak)	17.2801
	tumour: % nucleous Positive Tissue (moderate)	10.7961		tumour: % nucleous Positive Tissue (moderate)	10.6603		tumour: % nucleous Positive Tissue (moderate)	10.1185		tumour: % nucleous Positive Tissue (moderate)	11.2241		tumour: % nucleous Positive Tissue (moderate)	10.7213		tumour: % nucleous Positive Tissue (moderate)	9.99095		tumour: % nucleous Positive Tissue (moderate)	11.454		tumour: % nucleous Positive Tissue (moderate)	11.112
	tumour: % nucleous Positive Tissue (strong)	20.6182		tumour: % nucleous Positive Tissue (strong)	23.5265		tumour: % nucleous Positive Tissue (strong)	21.6258		tumour: % nucleous Positive Tissue (strong)	20.8379		tumour: % nucleous Positive Tissue (strong)	20.493		tumour: % nucleous Positive Tissue (strong)	20.2262		tumour: % nucleous Positive Tissue (strong)	19.9491		tumour: % nucleous Positive Tissue (strong)	19.7345
	tumour: % cd31 Positive Tissue	1.58936		tumour: % cd31 Positive Tissue	1.50283		tumour: % cd31 Positive Tissue	1.59604		tumour: % cd31 Positive Tissue	1.72572		tumour: % cd31 Positive Tissue	1.68466		tumour: % cd31 Positive Tissue	1.90269		tumour: % cd31 Positive Tissue	1.59157		tumour: % cd31 Positive Tissue	1.41636		1.62615
	tumour: % cd31 Positive Tissue (weak)	0.48847		tumour: % cd31 Positive Tissue (weak)	0.451839		tumour: % cd31 Positive Tissue (weak)	0.411663		tumour: % cd31 Positive Tissue (weak)	0.473941		tumour: % cd31 Positive Tissue (weak)	0.432425		tumour: % cd31 Positive Tissue (weak)	0.508405		tumour: % cd31 Positive Tissue (weak)	0.54135		tumour: % cd31 Positive Tissue (weak)	0.468717
	tumour: % cd31 Positive Tissue (moderate)	0.475695		tumour: % cd31 Positive Tissue (moderate)	0.44735		tumour: % cd31 Positive Tissue (moderate)	0.411948		tumour: % cd31 Positive Tissue (moderate)	0.488057		tumour: % cd31 Positive Tissue (moderate)	0.43811		tumour: % cd31 Positive Tissue (moderate)	0.514263		tumour: % cd31 Positive Tissue (moderate)	0.495103		tumour: % cd31 Positive Tissue (moderate)	0.450421
	tumour: % cd31 Positive Tissue (strong)	0.625195		tumour: % cd31 Positive Tissue (strong)	0.603637		tumour: % cd31 Positive Tissue (strong)	0.77243		tumour: % cd31 Positive Tissue (strong)	0.763718		tumour: % cd31 Positive Tissue (strong)	0.81412		tumour: % cd31 Positive Tissue (strong)	0.880022		tumour: % cd31 Positive Tissue (strong)	0.555114		tumour: % cd31 Positive Tissue (strong)	0.497224
	tumour: nucleous Average Positive Optical Density	0.35487		tumour: nucleous Average Positive Optical Density	0.384216		tumour: nucleous Average Positive Optical Density	0.376264		tumour: nucleous Average Positive Optical Density	0.355723		tumour: nucleous Average Positive Optical Density	0.356651		tumour: nucleous Average Positive Optical Density	0.368193		tumour: nucleous Average Positive Optical Density	0.349791		tumour: nucleous Average Positive Optical Density	0.347838
	tumour: cd31 Average Positive Optical Density	0.639356		tumour: cd31 Average Positive Optical Density	0.640165		tumour: cd31 Average Positive Optical Density	0.711669		tumour: cd31 Average Positive Optical Density	0.671695		tumour: cd31 Average Positive Optical Density	0.7073		tumour: cd31 Average Positive Optical Density	0.69117		tumour: cd31 Average Positive Optical Density	0.620576		tumour: cd31 Average Positive Optical Density	0.616199
	tumour: % Negative Tissue	49.9174		tumour: % Negative Tissue	49.5719		tumour: % Negative Tissue	51.5114		tumour: % Negative Tissue	49.4198		tumour: % Negative Tissue	51.2668		tumour: % Negative Tissue	53.4172		tumour: % Negative Tissue	50.348		tumour: % Negative Tissue	50.7957
	BAJF107.2b	WT
	Name	Value		Name	Value		Name	Value		Name	Value		Name	Value		Name	Value		Name	Value		Name	Value
	Classified Area (mm²)	0.63763		Classified Area (mm²)	0.52097		Classified Area (mm²)	0.49354		Classified Area (mm²)	0.74668		Classified Area (mm²)	0.4022		Classified Area (mm²)	0.47016		Classified Area (mm²)	0.71196		Classified Area (mm²)	0.66619
	tumour Area (mm²)	0.63756		tumour Area (mm²)	0.52062		tumour Area (mm²)	0.47858		tumour Area (mm²)	0.74668		tumour Area (mm²)	0.39896		tumour Area (mm²)	0.47016		tumour Area (mm²)	0.71196		tumour Area (mm²)	0.66619
	Necrosis Area (mm²)	0		Necrosis Area (mm²)	0		Necrosis Area (mm²)	0.00034		Necrosis Area (mm²)	0		Necrosis Area (mm²)	0		Necrosis Area (mm²)	0		Necrosis Area (mm²)	0		Necrosis Area (mm²)	0
	Empty Area (mm²)	0		Empty Area (mm²)	0.00035		Empty Area (mm²)	0.01463		Empty Area (mm²)	0		Empty Area (mm²)	0.00245		Empty Area (mm²)	0		Empty Area (mm²)	0		Empty Area (mm²)	0
	Normal Area (mm²)	6e-05		Normal Area (mm²)	0		Normal Area (mm²)	0		Normal Area (mm²)	0		Normal Area (mm²)	0.00078		Normal Area (mm²)	0		Normal Area (mm²)	0		Normal Area (mm²)	0
	Tissue Area Analyzed (μm²)	636848		Tissue Area Analyzed (μm²)	517529		Tissue Area Analyzed (μm²)	465736		Tissue Area Analyzed (μm²)	746316		Tissue Area Analyzed (μm²)	395128		Tissue Area Analyzed (μm²)	468684		Tissue Area Analyzed (μm²)	710901		Tissue Area Analyzed (μm²)	664607
	nucleous Area (μm²)	332855		nucleous Area (μm²)	277271		nucleous Area (μm²)	169931		nucleous Area (μm²)	358993		nucleous Area (μm²)	172739		nucleous Area (μm²)	244419		nucleous Area (μm²)	389208		nucleous Area (μm²)	493219
	nucleous Weak Area (μm²)	123272		nucleous Weak Area (μm²)	107339		nucleous Weak Area (μm²)	63410.6		nucleous Weak Area (μm²)	148853		nucleous Weak Area (μm²)	67295.6		nucleous Weak Area (μm²)	102692		nucleous Weak Area (μm²)	166143		nucleous Weak Area (μm²)	237775
	nucleous Moderate Area (μm²)	62755.1		nucleous Moderate Area (μm²)	52363		nucleous Moderate Area (μm²)	38815.6		nucleous Moderate Area (μm²)	71759.4		nucleous Moderate Area (μm²)	37786.6		nucleous Moderate Area (μm²)	44817.5		nucleous Moderate Area (μm²)	68355.9		nucleous Moderate Area (μm²)	79320.9
	nucleous Strong Area (μm²)	146828		nucleous Strong Area (μm²)	117569		nucleous Strong Area (μm²)	67705		nucleous Strong Area (μm²)	138381		nucleous Strong Area (μm²)	67656.9		nucleous Strong Area (μm²)	96909		nucleous Strong Area (μm²)	154709		nucleous Strong Area (μm²)	176123
	cd31 Area (μm²)	2699.86		cd31 Area (μm²)	6650.59		cd31 Area (μm²)	10544.2		cd31 Area (μm²)	10207.9		cd31 Area (μm²)	7114.87		cd31 Area (μm²)	2147.54		cd31 Area (μm²)	5251.2		cd31 Area (μm²)	4599.96
	cd31 Weak Area (μm²)	1180.79		cd31 Weak Area (μm²)	2539.45		cd31 Weak Area (μm²)	3434.6		cd31 Weak Area (μm²)	3472.04		cd31 Weak Area (μm²)	3027		cd31 Weak Area (μm²)	895.146		cd31 Weak Area (μm²)	2064.3		cd31 Weak Area (μm²)	1783.46
	cd31 Moderate Area (μm²)	901.471		cd31 Moderate Area (μm²)	2167.28		cd31 Moderate Area (μm²)	3053.31		cd31 Moderate Area (μm²)	3100.88		cd31 Moderate Area (μm²)	2292.26		cd31 Moderate Area (μm²)	650.739		cd31 Moderate Area (μm²)	1676.94		cd31 Moderate Area (μm²)	1489.21
	cd31 Strong Area (μm²)	617.595		cd31 Strong Area (μm²)	1943.87		cd31 Strong Area (μm²)	4056.24		cd31 Strong Area (μm²)	3634.98		cd31 Strong Area (μm²)	1795.6		cd31 Strong Area (μm²)	601.655		cd31 Strong Area (μm²)	1509.96		cd31 Strong Area (μm²)	1327.29
	% nucleous Positive Tissue	52.266		% nucleous Positive Tissue	53.5758		% nucleous Positive Tissue	36.4866		% nucleous Positive Tissue	48.1021		% nucleous Positive Tissue	43.7173		% nucleous Positive Tissue	52.1499		% nucleous Positive Tissue	54.7486		% nucleous Positive Tissue	74.2121
	% nucleous Positive Tissue (weak)	19.3565		% nucleous Positive Tissue (weak)	20.7406		% nucleous Positive Tissue (weak)	13.6151		% nucleous Positive Tissue (weak)	19.945		% nucleous Positive Tissue (weak)	17.0314		% nucleous Positive Tissue (weak)	21.9107		% nucleous Positive Tissue (weak)	23.3708		% nucleous Positive Tissue (weak)	35.7767
	% nucleous Positive Tissue (moderate)	9.85401		% nucleous Positive Tissue (moderate)	10.1179		% nucleous Positive Tissue (moderate)	8.33425		% nucleous Positive Tissue (moderate)	9.61516		% nucleous Positive Tissue (moderate)	9.56315		% nucleous Positive Tissue (moderate)	9.56241		% nucleous Positive Tissue (moderate)	9.6154		% nucleous Positive Tissue (moderate)	11.935
	% nucleous Positive Tissue (strong)	23.0554		% nucleous Positive Tissue (strong)	22.7173		% nucleous Positive Tissue (strong)	14.5372		% nucleous Positive Tissue (strong)	18.5419		% nucleous Positive Tissue (strong)	17.1228		% nucleous Positive Tissue (strong)	20.6768		% nucleous Positive Tissue (strong)	21.7625		% nucleous Positive Tissue (strong)	26.5003
	% cd31 Positive Tissue	0.423941		% cd31 Positive Tissue	1.28507		% cd31 Positive Tissue	2.26397		% cd31 Positive Tissue	1.36777		% cd31 Positive Tissue	1.80065		% cd31 Positive Tissue	0.458206		% cd31 Positive Tissue	0.738669		% cd31 Positive Tissue	0.692132
	% cd31 Positive Tissue (weak)	0.185412		% cd31 Positive Tissue (weak)	0.490687		% cd31 Positive Tissue (weak)	0.737455		% cd31 Positive Tissue (weak)	0.465224		% cd31 Positive Tissue (weak)	0.766081		% cd31 Positive Tissue (weak)	0.190991		% cd31 Positive Tissue (weak)	0.290378		% cd31 Positive Tissue (weak)	0.268348
	% cd31 Positive Tissue (moderate)	0.141552		% cd31 Positive Tissue (moderate)	0.418773		% cd31 Positive Tissue (moderate)	0.655588		% cd31 Positive Tissue (moderate)	0.415492		% cd31 Positive Tissue (moderate)	0.580132		% cd31 Positive Tissue (moderate)	0.138844		% cd31 Positive Tissue (moderate)	0.23589		% cd31 Positive Tissue (moderate)	0.224074
	% cd31 Positive Tissue (strong)	0.096977		% cd31 Positive Tissue (strong)	0.375605		% cd31 Positive Tissue (strong)	0.87093		% cd31 Positive Tissue (strong)	0.487057		% cd31 Positive Tissue (strong)	0.454437		% cd31 Positive Tissue (strong)	0.128371		% cd31 Positive Tissue (strong)	0.212401		% cd31 Positive Tissue (strong)	0.19971
	nucleous Average Positive Optical Density	0.369152		nucleous Average Positive Optical Density	0.359459		nucleous Average Positive Optical Density	0.345863		nucleous Average Positive Optical Density	0.340461		nucleous Average Positive Optical Density	0.344012		nucleous Average Positive Optical Density	0.354949		nucleous Average Positive Optical Density	0.349898		nucleous Average Positive Optical Density	0.341688
	cd31 Average Positive Optical Density	0.557596		cd31 Average Positive Optical Density	0.589006		cd31 Average Positive Optical Density	0.632006		cd31 Average Positive Optical Density	0.62221		cd31 Average Positive Optical Density	0.571693		cd31 Average Positive Optical Density	0.584051		cd31 Average Positive Optical Density	0.587543		cd31 Average Positive Optical Density	0.587246
	% Negative Tissue	47.4043		% Negative Tissue	45.4906		% Negative Tissue	61.8495		% Negative Tissue	50.9077		% Negative Tissue	54.888		% Negative Tissue	47.4778		% Negative Tissue	44.7154		% Negative Tissue	25.344
	tumour: Tissue Area Analyzed (μm²)	636848		tumour: Tissue Area Analyzed (μm²)	517529		tumour: Tissue Area Analyzed (μm²)	465736		tumour: Tissue Area Analyzed (μm²)	746316		tumour: Tissue Area Analyzed (μm²)	395128		tumour: Tissue Area Analyzed (μm²)	468684		tumour: Tissue Area Analyzed (μm²)	710901		tumour: Tissue Area Analyzed (μm²)	664607
	tumour: nucleous Area (μm²)	332855		tumour: nucleous Area (μm²)	277271		tumour: nucleous Area (μm²)	169931		tumour: nucleous Area (μm²)	358993		tumour: nucleous Area (μm²)	172739		tumour: nucleous Area (μm²)	244419		tumour: nucleous Area (μm²)	389208		tumour: nucleous Area (μm²)	493219
	tumour: nucleous Weak Area (μm²)	123272		tumour: nucleous Weak Area (μm²)	107339		tumour: nucleous Weak Area (μm²)	63410.6		tumour: nucleous Weak Area (μm²)	148853		tumour: nucleous Weak Area (μm²)	67295.6		tumour: nucleous Weak Area (μm²)	102692		tumour: nucleous Weak Area (μm²)	166143		tumour: nucleous Weak Area (μm²)	237775
	tumour: nucleous Moderate Area (μm²)	62755.1		tumour: nucleous Moderate Area (μm²)	52363		tumour: nucleous Moderate Area (μm²)	38815.6		tumour: nucleous Moderate Area (μm²)	71759.4		tumour: nucleous Moderate Area (μm²)	37786.6		tumour: nucleous Moderate Area (μm²)	44817.5		tumour: nucleous Moderate Area (μm²)	68355.9		tumour: nucleous Moderate Area (μm²)	79320.9
	tumour: nucleous Strong Area (μm²)	146828		tumour: nucleous Strong Area (μm²)	117569		tumour: nucleous Strong Area (μm²)	67705		tumour: nucleous Strong Area (μm²)	138381		tumour: nucleous Strong Area (μm²)	67656.9		tumour: nucleous Strong Area (μm²)	96909		tumour: nucleous Strong Area (μm²)	154709		tumour: nucleous Strong Area (μm²)	176123
	tumour: cd31 Area (μm²)	2699.86		tumour: cd31 Area (μm²)	6650.59		tumour: cd31 Area (μm²)	10544.2		tumour: cd31 Area (μm²)	10207.9		tumour: cd31 Area (μm²)	7114.87		tumour: cd31 Area (μm²)	2147.54		tumour: cd31 Area (μm²)	5251.2		tumour: cd31 Area (μm²)	4599.96
	tumour: cd31 Weak Area (μm²)	1180.79		tumour: cd31 Weak Area (μm²)	2539.45		tumour: cd31 Weak Area (μm²)	3434.6		tumour: cd31 Weak Area (μm²)	3472.04		tumour: cd31 Weak Area (μm²)	3027		tumour: cd31 Weak Area (μm²)	895.146		tumour: cd31 Weak Area (μm²)	2064.3		tumour: cd31 Weak Area (μm²)	1783.46
	tumour: cd31 Moderate Area (μm²)	901.471		tumour: cd31 Moderate Area (μm²)	2167.28		tumour: cd31 Moderate Area (μm²)	3053.31		tumour: cd31 Moderate Area (μm²)	3100.88		tumour: cd31 Moderate Area (μm²)	2292.26		tumour: cd31 Moderate Area (μm²)	650.739		tumour: cd31 Moderate Area (μm²)	1676.94		tumour: cd31 Moderate Area (μm²)	1489.21
	tumour: cd31 Strong Area (μm²)	617.595		tumour: cd31 Strong Area (μm²)	1943.87		tumour: cd31 Strong Area (μm²)	4056.24		tumour: cd31 Strong Area (μm²)	3634.98		tumour: cd31 Strong Area (μm²)	1795.6		tumour: cd31 Strong Area (μm²)	601.655		tumour: cd31 Strong Area (μm²)	1509.96		tumour: cd31 Strong Area (μm²)	1327.29
	tumour: % nucleous Positive Tissue	52.266		tumour: % nucleous Positive Tissue	53.5758		tumour: % nucleous Positive Tissue	36.4866		tumour: % nucleous Positive Tissue	48.1021		tumour: % nucleous Positive Tissue	43.7173		tumour: % nucleous Positive Tissue	52.1499		tumour: % nucleous Positive Tissue	54.7486		tumour: % nucleous Positive Tissue	74.2121
	tumour: % nucleous Positive Tissue (weak)	19.3565		tumour: % nucleous Positive Tissue (weak)	20.7406		tumour: % nucleous Positive Tissue (weak)	13.6151		tumour: % nucleous Positive Tissue (weak)	19.945		tumour: % nucleous Positive Tissue (weak)	17.0314		tumour: % nucleous Positive Tissue (weak)	21.9107		tumour: % nucleous Positive Tissue (weak)	23.3708		tumour: % nucleous Positive Tissue (weak)	35.7767
	tumour: % nucleous Positive Tissue (moderate)	9.85401		tumour: % nucleous Positive Tissue (moderate)	10.1179		tumour: % nucleous Positive Tissue (moderate)	8.33425		tumour: % nucleous Positive Tissue (moderate)	9.61516		tumour: % nucleous Positive Tissue (moderate)	9.56315		tumour: % nucleous Positive Tissue (moderate)	9.56241		tumour: % nucleous Positive Tissue (moderate)	9.6154		tumour: % nucleous Positive Tissue (moderate)	11.935
	tumour: % nucleous Positive Tissue (strong)	23.0554		tumour: % nucleous Positive Tissue (strong)	22.7173		tumour: % nucleous Positive Tissue (strong)	14.5372		tumour: % nucleous Positive Tissue (strong)	18.5419		tumour: % nucleous Positive Tissue (strong)	17.1228		tumour: % nucleous Positive Tissue (strong)	20.6768		tumour: % nucleous Positive Tissue (strong)	21.7625		tumour: % nucleous Positive Tissue (strong)	26.5003
	tumour: % cd31 Positive Tissue	0.423941		tumour: % cd31 Positive Tissue	1.28507		tumour: % cd31 Positive Tissue	2.26397		tumour: % cd31 Positive Tissue	1.36777		tumour: % cd31 Positive Tissue	1.80065		tumour: % cd31 Positive Tissue	0.458206		tumour: % cd31 Positive Tissue	0.738669		tumour: % cd31 Positive Tissue	0.692132		1.1288
	tumour: % cd31 Positive Tissue (weak)	0.185412		tumour: % cd31 Positive Tissue (weak)	0.490687		tumour: % cd31 Positive Tissue (weak)	0.737455		tumour: % cd31 Positive Tissue (weak)	0.465224		tumour: % cd31 Positive Tissue (weak)	0.766081		tumour: % cd31 Positive Tissue (weak)	0.190991		tumour: % cd31 Positive Tissue (weak)	0.290378		tumour: % cd31 Positive Tissue (weak)	0.268348
	tumour: % cd31 Positive Tissue (moderate)	0.141552		tumour: % cd31 Positive Tissue (moderate)	0.418773		tumour: % cd31 Positive Tissue (moderate)	0.655588		tumour: % cd31 Positive Tissue (moderate)	0.415492		tumour: % cd31 Positive Tissue (moderate)	0.580132		tumour: % cd31 Positive Tissue (moderate)	0.138844		tumour: % cd31 Positive Tissue (moderate)	0.23589		tumour: % cd31 Positive Tissue (moderate)	0.224074
	tumour: % cd31 Positive Tissue (strong)	0.096977		tumour: % cd31 Positive Tissue (strong)	0.375605		tumour: % cd31 Positive Tissue (strong)	0.87093		tumour: % cd31 Positive Tissue (strong)	0.487057		tumour: % cd31 Positive Tissue (strong)	0.454437		tumour: % cd31 Positive Tissue (strong)	0.128371		tumour: % cd31 Positive Tissue (strong)	0.212401		tumour: % cd31 Positive Tissue (strong)	0.19971
	tumour: nucleous Average Positive Optical Density	0.369152		tumour: nucleous Average Positive Optical Density	0.359459		tumour: nucleous Average Positive Optical Density	0.345863		tumour: nucleous Average Positive Optical Density	0.340461		tumour: nucleous Average Positive Optical Density	0.344012		tumour: nucleous Average Positive Optical Density	0.354949		tumour: nucleous Average Positive Optical Density	0.349898		tumour: nucleous Average Positive Optical Density	0.341688
	tumour: cd31 Average Positive Optical Density	0.557596		tumour: cd31 Average Positive Optical Density	0.589006		tumour: cd31 Average Positive Optical Density	0.632006		tumour: cd31 Average Positive Optical Density	0.62221		tumour: cd31 Average Positive Optical Density	0.571693		tumour: cd31 Average Positive Optical Density	0.584051		tumour: cd31 Average Positive Optical Density	0.587543		tumour: cd31 Average Positive Optical Density	0.587246
	tumour: % Negative Tissue	47.4043		tumour: % Negative Tissue	45.4906		tumour: % Negative Tissue	61.8495		tumour: % Negative Tissue	50.9077		tumour: % Negative Tissue	54.888		tumour: % Negative Tissue	47.4778		tumour: % Negative Tissue	44.7154		tumour: % Negative Tissue	25.344
	BSNA32.5b	WT
	Name	Value		Name	Value		Name	Value		Name	Value		Name	Value		Name	Value		Name	Value		Name	Value
	Classified Area (mm²)	0.88765		Classified Area (mm²)	0.81072		Classified Area (mm²)	0.75656		Classified Area (mm²)	0.87085		Classified Area (mm²)	0.43816		Classified Area (mm²)	1.07823		Classified Area (mm²)	0.53784		Classified Area (mm²)	0.79991
	tumour Area (mm²)	0.88748		tumour Area (mm²)	0.8106		tumour Area (mm²)	0.75645		tumour Area (mm²)	0.87083		tumour Area (mm²)	0.43488		tumour Area (mm²)	1.07224		tumour Area (mm²)	0.53297		tumour Area (mm²)	0.79671
	Necrosis Area (mm²)	0		Necrosis Area (mm²)	0		Necrosis Area (mm²)	0		Necrosis Area (mm²)	0		Necrosis Area (mm²)	0.00242		Necrosis Area (mm²)	0		Necrosis Area (mm²)	0		Necrosis Area (mm²)	0.00264
	Empty Area (mm²)	0.00018		Empty Area (mm²)	0.00013		Empty Area (mm²)	0.00011		Empty Area (mm²)	0		Empty Area (mm²)	0.00087		Empty Area (mm²)	0.00599		Empty Area (mm²)	0.00487		Empty Area (mm²)	0.00056
	Normal Area (mm²)	0		Normal Area (mm²)	0		Normal Area (mm²)	0		Normal Area (mm²)	2e-05		Normal Area (mm²)	0		Normal Area (mm²)	0		Normal Area (mm²)	0		Normal Area (mm²)	0
	Tissue Area Analyzed (μm²)	871245		Tissue Area Analyzed (μm²)	807743		Tissue Area Analyzed (μm²)	746960		Tissue Area Analyzed (μm²)	869151		Tissue Area Analyzed (μm²)	414548		Tissue Area Analyzed (μm²)	1.06716e+06		Tissue Area Analyzed (μm²)	526105		Tissue Area Analyzed (μm²)	787233
	nucleous Area (μm²)	319518		nucleous Area (μm²)	336434		nucleous Area (μm²)	313235		nucleous Area (μm²)	360736		nucleous Area (μm²)	167216		nucleous Area (μm²)	487231		nucleous Area (μm²)	220640		nucleous Area (μm²)	280201
	nucleous Weak Area (μm²)	116284		nucleous Weak Area (μm²)	126091		nucleous Weak Area (μm²)	123352		nucleous Weak Area (μm²)	144205		nucleous Weak Area (μm²)	54591		nucleous Weak Area (μm²)	187049		nucleous Weak Area (μm²)	82423.5		nucleous Weak Area (μm²)	107406
	nucleous Moderate Area (μm²)	67924.6		nucleous Moderate Area (μm²)	73656		nucleous Moderate Area (μm²)	69776.6		nucleous Moderate Area (μm²)	72807.9		nucleous Moderate Area (μm²)	37154.1		nucleous Moderate Area (μm²)	117260		nucleous Moderate Area (μm²)	52216.5		nucleous Moderate Area (μm²)	65158.9
	nucleous Strong Area (μm²)	135309		nucleous Strong Area (μm²)	136687		nucleous Strong Area (μm²)	120107		nucleous Strong Area (μm²)	143723		nucleous Strong Area (μm²)	75471.1		nucleous Strong Area (μm²)	182922		nucleous Strong Area (μm²)	86000		nucleous Strong Area (μm²)	107636
	cd31 Area (μm²)	13979.8		cd31 Area (μm²)	8366.25		cd31 Area (μm²)	6335.35		cd31 Area (μm²)	16976.7		cd31 Area (μm²)	13704.7		cd31 Area (μm²)	18220.9		cd31 Area (μm²)	4850.94		cd31 Area (μm²)	18037.5
	cd31 Weak Area (μm²)	4662.7		cd31 Weak Area (μm²)	2725.16		cd31 Weak Area (μm²)	2810.68		cd31 Weak Area (μm²)	5187.19		cd31 Weak Area (μm²)	4409.69		cd31 Weak Area (μm²)	7211.52		cd31 Weak Area (μm²)	2174.87		cd31 Weak Area (μm²)	5587.45
	cd31 Moderate Area (μm²)	4232.33		cd31 Moderate Area (μm²)	2552.1		cd31 Moderate Area (μm²)	2071.38		cd31 Moderate Area (μm²)	5037.66		cd31 Moderate Area (μm²)	4093.94		cd31 Moderate Area (μm²)	5817.94		cd31 Moderate Area (μm²)	1496.8		cd31 Moderate Area (μm²)	5322.55
	cd31 Strong Area (μm²)	5084.72		cd31 Strong Area (μm²)	3088.99		cd31 Strong Area (μm²)	1453.28		cd31 Strong Area (μm²)	6751.8		cd31 Strong Area (μm²)	5201.11		cd31 Strong Area (μm²)	5191.49		cd31 Strong Area (μm²)	1179.27		cd31 Strong Area (μm²)	7127.52
	% nucleous Positive Tissue	36.6737		% nucleous Positive Tissue	41.6512		% nucleous Positive Tissue	41.9346		% nucleous Positive Tissue	41.5044		% nucleous Positive Tissue	40.337		% nucleous Positive Tissue	45.6569		% nucleous Positive Tissue	41.9384		% nucleous Positive Tissue	35.5932
	% nucleous Positive Tissue (weak)	13.3469		% nucleous Positive Tissue (weak)	15.6103		% nucleous Positive Tissue (weak)	16.5138		% nucleous Positive Tissue (weak)	16.5915		% nucleous Positive Tissue (weak)	13.1688		% nucleous Positive Tissue (weak)	17.5278		% nucleous Positive Tissue (weak)	15.6667		% nucleous Positive Tissue (weak)	13.6435
	% nucleous Positive Tissue (moderate)	7.79626		% nucleous Positive Tissue (moderate)	9.11874		% nucleous Positive Tissue (moderate)	9.34141		% nucleous Positive Tissue (moderate)	8.37689		% nucleous Positive Tissue (moderate)	8.96256		% nucleous Positive Tissue (moderate)	10.9881		% nucleous Positive Tissue (moderate)	9.92511		% nucleous Positive Tissue (moderate)	8.27696
	% nucleous Positive Tissue (strong)	15.5305		% nucleous Positive Tissue (strong)	16.9221		% nucleous Positive Tissue (strong)	16.0794		% nucleous Positive Tissue (strong)	16.536		% nucleous Positive Tissue (strong)	18.2056		% nucleous Positive Tissue (strong)	17.141		% nucleous Positive Tissue (strong)	16.3466		% nucleous Positive Tissue (strong)	13.6727
	% cd31 Positive Tissue	1.60457		% cd31 Positive Tissue	1.03576		% cd31 Positive Tissue	0.848151		% cd31 Positive Tissue	1.95324		% cd31 Positive Tissue	3.30595		% cd31 Positive Tissue	1.70743		% cd31 Positive Tissue	0.922048		% cd31 Positive Tissue	2.29126
	% cd31 Positive Tissue (weak)	0.535177		% cd31 Positive Tissue (weak)	0.33738		% cd31 Positive Tissue (weak)	0.376282		% cd31 Positive Tissue (weak)	0.596811		% cd31 Positive Tissue (weak)	1.06374		% cd31 Positive Tissue (weak)	0.675768		% cd31 Positive Tissue (weak)	0.41339		% cd31 Positive Tissue (weak)	0.709758
	% cd31 Positive Tissue (moderate)	0.48578		% cd31 Positive Tissue (moderate)	0.315955		% cd31 Positive Tissue (moderate)	0.277309		% cd31 Positive Tissue (moderate)	0.579607		% cd31 Positive Tissue (moderate)	0.987566		% cd31 Positive Tissue (moderate)	0.54518		% cd31 Positive Tissue (moderate)	0.284506		% cd31 Positive Tissue (moderate)	0.676109
	% cd31 Positive Tissue (strong)	0.583615		% cd31 Positive Tissue (strong)	0.382422		% cd31 Positive Tissue (strong)	0.19456		% cd31 Positive Tissue (strong)	0.776826		% cd31 Positive Tissue (strong)	1.25465		% cd31 Positive Tissue (strong)	0.486478		% cd31 Positive Tissue (strong)	0.224152		% cd31 Positive Tissue (strong)	0.905388
	nucleous Average Positive Optical Density	0.366385		nucleous Average Positive Optical Density	0.354184		nucleous Average Positive Optical Density	0.342525		nucleous Average Positive Optical Density	0.355978		nucleous Average Positive Optical Density	0.372979		nucleous Average Positive Optical Density	0.334495		nucleous Average Positive Optical Density	0.349104		nucleous Average Positive Optical Density	0.337125
	cd31 Average Positive Optical Density	0.632409		cd31 Average Positive Optical Density	0.625579		cd31 Average Positive Optical Density	0.558148		cd31 Average Positive Optical Density	0.642809		cd31 Average Positive Optical Density	0.640761		cd31 Average Positive Optical Density	0.588925		cd31 Average Positive Optical Density	0.56957		cd31 Average Positive Optical Density	0.644701
	% Negative Tissue	61.9303		% Negative Tissue	57.4591		% Negative Tissue	57.3421		% Negative Tissue	56.9057		% Negative Tissue	56.892		% Negative Tissue	52.859		% Negative Tissue	57.2599		% Negative Tissue	62.4583
	tumour: Tissue Area Analyzed (μm²)	871245		tumour: Tissue Area Analyzed (μm²)	807743		tumour: Tissue Area Analyzed (μm²)	746960		tumour: Tissue Area Analyzed (μm²)	869151		tumour: Tissue Area Analyzed (μm²)	414548		tumour: Tissue Area Analyzed (μm²)	1.06716e+06		tumour: Tissue Area Analyzed (μm²)	526105		tumour: Tissue Area Analyzed (μm²)	787233
	tumour: nucleous Area (μm²)	319518		tumour: nucleous Area (μm²)	336434		tumour: nucleous Area (μm²)	313235		tumour: nucleous Area (μm²)	360736		tumour: nucleous Area (μm²)	167216		tumour: nucleous Area (μm²)	487231		tumour: nucleous Area (μm²)	220640		tumour: nucleous Area (μm²)	280201
	tumour: nucleous Weak Area (μm²)	116284		tumour: nucleous Weak Area (μm²)	126091		tumour: nucleous Weak Area (μm²)	123352		tumour: nucleous Weak Area (μm²)	144205		tumour: nucleous Weak Area (μm²)	54591		tumour: nucleous Weak Area (μm²)	187049		tumour: nucleous Weak Area (μm²)	82423.5		tumour: nucleous Weak Area (μm²)	107406
	tumour: nucleous Moderate Area (μm²)	67924.6		tumour: nucleous Moderate Area (μm²)	73656		tumour: nucleous Moderate Area (μm²)	69776.6		tumour: nucleous Moderate Area (μm²)	72807.9		tumour: nucleous Moderate Area (μm²)	37154.1		tumour: nucleous Moderate Area (μm²)	117260		tumour: nucleous Moderate Area (μm²)	52216.5		tumour: nucleous Moderate Area (μm²)	65158.9
	tumour: nucleous Strong Area (μm²)	135309		tumour: nucleous Strong Area (μm²)	136687		tumour: nucleous Strong Area (μm²)	120107		tumour: nucleous Strong Area (μm²)	143723		tumour: nucleous Strong Area (μm²)	75471.1		tumour: nucleous Strong Area (μm²)	182922		tumour: nucleous Strong Area (μm²)	86000		tumour: nucleous Strong Area (μm²)	107636
	tumour: cd31 Area (μm²)	13979.8		tumour: cd31 Area (μm²)	8366.25		tumour: cd31 Area (μm²)	6335.35		tumour: cd31 Area (μm²)	16976.7		tumour: cd31 Area (μm²)	13704.7		tumour: cd31 Area (μm²)	18220.9		tumour: cd31 Area (μm²)	4850.94		tumour: cd31 Area (μm²)	18037.5
	tumour: cd31 Weak Area (μm²)	4662.7		tumour: cd31 Weak Area (μm²)	2725.16		tumour: cd31 Weak Area (μm²)	2810.68		tumour: cd31 Weak Area (μm²)	5187.19		tumour: cd31 Weak Area (μm²)	4409.69		tumour: cd31 Weak Area (μm²)	7211.52		tumour: cd31 Weak Area (μm²)	2174.87		tumour: cd31 Weak Area (μm²)	5587.45
	tumour: cd31 Moderate Area (μm²)	4232.33		tumour: cd31 Moderate Area (μm²)	2552.1		tumour: cd31 Moderate Area (μm²)	2071.38		tumour: cd31 Moderate Area (μm²)	5037.66		tumour: cd31 Moderate Area (μm²)	4093.94		tumour: cd31 Moderate Area (μm²)	5817.94		tumour: cd31 Moderate Area (μm²)	1496.8		tumour: cd31 Moderate Area (μm²)	5322.55
	tumour: cd31 Strong Area (μm²)	5084.72		tumour: cd31 Strong Area (μm²)	3088.99		tumour: cd31 Strong Area (μm²)	1453.28		tumour: cd31 Strong Area (μm²)	6751.8		tumour: cd31 Strong Area (μm²)	5201.11		tumour: cd31 Strong Area (μm²)	5191.49		tumour: cd31 Strong Area (μm²)	1179.27		tumour: cd31 Strong Area (μm²)	7127.52
	tumour: % nucleous Positive Tissue	36.6737		tumour: % nucleous Positive Tissue	41.6512		tumour: % nucleous Positive Tissue	41.9346		tumour: % nucleous Positive Tissue	41.5044		tumour: % nucleous Positive Tissue	40.337		tumour: % nucleous Positive Tissue	45.6569		tumour: % nucleous Positive Tissue	41.9384		tumour: % nucleous Positive Tissue	35.5932
	tumour: % nucleous Positive Tissue (weak)	13.3469		tumour: % nucleous Positive Tissue (weak)	15.6103		tumour: % nucleous Positive Tissue (weak)	16.5138		tumour: % nucleous Positive Tissue (weak)	16.5915		tumour: % nucleous Positive Tissue (weak)	13.1688		tumour: % nucleous Positive Tissue (weak)	17.5278		tumour: % nucleous Positive Tissue (weak)	15.6667		tumour: % nucleous Positive Tissue (weak)	13.6435
	tumour: % nucleous Positive Tissue (moderate)	7.79626		tumour: % nucleous Positive Tissue (moderate)	9.11874		tumour: % nucleous Positive Tissue (moderate)	9.34141		tumour: % nucleous Positive Tissue (moderate)	8.37689		tumour: % nucleous Positive Tissue (moderate)	8.96256		tumour: % nucleous Positive Tissue (moderate)	10.9881		tumour: % nucleous Positive Tissue (moderate)	9.92511		tumour: % nucleous Positive Tissue (moderate)	8.27696
	tumour: % nucleous Positive Tissue (strong)	15.5305		tumour: % nucleous Positive Tissue (strong)	16.9221		tumour: % nucleous Positive Tissue (strong)	16.0794		tumour: % nucleous Positive Tissue (strong)	16.536		tumour: % nucleous Positive Tissue (strong)	18.2056		tumour: % nucleous Positive Tissue (strong)	17.141		tumour: % nucleous Positive Tissue (strong)	16.3466		tumour: % nucleous Positive Tissue (strong)	13.6727
	tumour: % cd31 Positive Tissue	1.60457		tumour: % cd31 Positive Tissue	1.03576		tumour: % cd31 Positive Tissue	0.848151		tumour: % cd31 Positive Tissue	1.95324		tumour: % cd31 Positive Tissue	3.30595		tumour: % cd31 Positive Tissue	1.70743		tumour: % cd31 Positive Tissue	0.922048		tumour: % cd31 Positive Tissue	2.29126		1.70855
	tumour: % cd31 Positive Tissue (weak)	0.535177		tumour: % cd31 Positive Tissue (weak)	0.33738		tumour: % cd31 Positive Tissue (weak)	0.376282		tumour: % cd31 Positive Tissue (weak)	0.596811		tumour: % cd31 Positive Tissue (weak)	1.06374		tumour: % cd31 Positive Tissue (weak)	0.675768		tumour: % cd31 Positive Tissue (weak)	0.41339		tumour: % cd31 Positive Tissue (weak)	0.709758
	tumour: % cd31 Positive Tissue (moderate)	0.48578		tumour: % cd31 Positive Tissue (moderate)	0.315955		tumour: % cd31 Positive Tissue (moderate)	0.277309		tumour: % cd31 Positive Tissue (moderate)	0.579607		tumour: % cd31 Positive Tissue (moderate)	0.987566		tumour: % cd31 Positive Tissue (moderate)	0.54518		tumour: % cd31 Positive Tissue (moderate)	0.284506		tumour: % cd31 Positive Tissue (moderate)	0.676109
	tumour: % cd31 Positive Tissue (strong)	0.583615		tumour: % cd31 Positive Tissue (strong)	0.382422		tumour: % cd31 Positive Tissue (strong)	0.19456		tumour: % cd31 Positive Tissue (strong)	0.776826		tumour: % cd31 Positive Tissue (strong)	1.25465		tumour: % cd31 Positive Tissue (strong)	0.486478		tumour: % cd31 Positive Tissue (strong)	0.224152		tumour: % cd31 Positive Tissue (strong)	0.905388
	tumour: nucleous Average Positive Optical Density	0.366385		tumour: nucleous Average Positive Optical Density	0.354184		tumour: nucleous Average Positive Optical Density	0.342525		tumour: nucleous Average Positive Optical Density	0.355978		tumour: nucleous Average Positive Optical Density	0.372979		tumour: nucleous Average Positive Optical Density	0.334495		tumour: nucleous Average Positive Optical Density	0.349104		tumour: nucleous Average Positive Optical Density	0.337125
	tumour: cd31 Average Positive Optical Density	0.632409		tumour: cd31 Average Positive Optical Density	0.625579		tumour: cd31 Average Positive Optical Density	0.558148		tumour: cd31 Average Positive Optical Density	0.642809		tumour: cd31 Average Positive Optical Density	0.640761		tumour: cd31 Average Positive Optical Density	0.588925		tumour: cd31 Average Positive Optical Density	0.56957		tumour: cd31 Average Positive Optical Density	0.644701
	tumour: % Negative Tissue	61.9303		tumour: % Negative Tissue	57.4591		tumour: % Negative Tissue	57.3421		tumour: % Negative Tissue	56.9057		tumour: % Negative Tissue	56.892		tumour: % Negative Tissue	52.859		tumour: % Negative Tissue	57.2599		tumour: % Negative Tissue	62.4583
	BSNA10.4d	HOM
	Name	Value		Name	Value		Name	Value		Name	Value		Name	Value		Name	Value		Name	Value		Name	Value
	Classified Area (mm²)	0.91101		Classified Area (mm²)	0.5095		Classified Area (mm²)	0.72441		Classified Area (mm²)	0.83749		Classified Area (mm²)	0.57805		Classified Area (mm²)	1.1407		Classified Area (mm²)	0.81833		Classified Area (mm²)	0.65791
	tumour Area (mm²)	0.90582		tumour Area (mm²)	0.5095		tumour Area (mm²)	0.72401		tumour Area (mm²)	0.83749		tumour Area (mm²)	0.57805		tumour Area (mm²)	1.14069		tumour Area (mm²)	0.81444		tumour Area (mm²)	0.65522
	Necrosis Area (mm²)	0		Necrosis Area (mm²)	0		Necrosis Area (mm²)	0		Necrosis Area (mm²)	0		Necrosis Area (mm²)	0		Necrosis Area (mm²)	0		Necrosis Area (mm²)	0		Necrosis Area (mm²)	0.00029
	Empty Area (mm²)	0.00519		Empty Area (mm²)	0		Empty Area (mm²)	0.0004		Empty Area (mm²)	0		Empty Area (mm²)	0		Empty Area (mm²)	2e-05		Empty Area (mm²)	0.00389		Empty Area (mm²)	0.0024
	Normal Area (mm²)	0		Normal Area (mm²)	0		Normal Area (mm²)	0		Normal Area (mm²)	0		Normal Area (mm²)	0		Normal Area (mm²)	0		Normal Area (mm²)	0		Normal Area (mm²)	0
	Tissue Area Analyzed (μm²)	897929		Tissue Area Analyzed (μm²)	505253		Tissue Area Analyzed (μm²)	720701		Tissue Area Analyzed (μm²)	836380		Tissue Area Analyzed (μm²)	568562		Tissue Area Analyzed (μm²)	1.13857e+06		Tissue Area Analyzed (μm²)	811175		Tissue Area Analyzed (μm²)	650655
	nucleous Area (μm²)	395028		nucleous Area (μm²)	249158		nucleous Area (μm²)	306898		nucleous Area (μm²)	421728		nucleous Area (μm²)	244104		nucleous Area (μm²)	617094		nucleous Area (μm²)	326977		nucleous Area (μm²)	301247
	nucleous Weak Area (μm²)	152693		nucleous Weak Area (μm²)	89113.6		nucleous Weak Area (μm²)	108801		nucleous Weak Area (μm²)	156662		nucleous Weak Area (μm²)	80163.4		nucleous Weak Area (μm²)	220246		nucleous Weak Area (μm²)	115058		nucleous Weak Area (μm²)	103628
	nucleous Moderate Area (μm²)	78663.5		nucleous Moderate Area (μm²)	51272		nucleous Moderate Area (μm²)	64600.5		nucleous Moderate Area (μm²)	95843.9		nucleous Moderate Area (μm²)	51521		nucleous Moderate Area (μm²)	127817		nucleous Moderate Area (μm²)	72246		nucleous Moderate Area (μm²)	69404.4
	nucleous Strong Area (μm²)	163672		nucleous Strong Area (μm²)	108773		nucleous Strong Area (μm²)	133497		nucleous Strong Area (μm²)	169222		nucleous Strong Area (μm²)	112420		nucleous Strong Area (μm²)	269031		nucleous Strong Area (μm²)	139673		nucleous Strong Area (μm²)	128214
	cd31 Area (μm²)	7324.36		cd31 Area (μm²)	1862.15		cd31 Area (μm²)	6344.96		cd31 Area (μm²)	6671.34		cd31 Area (μm²)	2845.09		cd31 Area (μm²)	15231.9		cd31 Area (μm²)	6539.78		cd31 Area (μm²)	3558.82
	cd31 Weak Area (μm²)	2512.89		cd31 Weak Area (μm²)	866.809		cd31 Weak Area (μm²)	2680.88		cd31 Weak Area (μm²)	2774.5		cd31 Weak Area (μm²)	1355.88		cd31 Weak Area (μm²)	6041.35		cd31 Weak Area (μm²)	3249.9		cd31 Weak Area (μm²)	1709.33
	cd31 Moderate Area (μm²)	2314.27		cd31 Moderate Area (μm²)	623.667		cd31 Moderate Area (μm²)	2117.18		cd31 Moderate Area (μm²)	2243.43		cd31 Moderate Area (μm²)	903.748		cd31 Moderate Area (μm²)	4999.46		cd31 Moderate Area (μm²)	2137.17		cd31 Moderate Area (μm²)	1136.01
	cd31 Strong Area (μm²)	2497.2		cd31 Strong Area (μm²)	371.67		cd31 Strong Area (μm²)	1546.9		cd31 Strong Area (μm²)	1653.41		cd31 Strong Area (μm²)	585.463		cd31 Strong Area (μm²)	4191.09		cd31 Strong Area (μm²)	1152.71		cd31 Strong Area (μm²)	713.485
	% nucleous Positive Tissue	43.9932		% nucleous Positive Tissue	49.3136		% nucleous Positive Tissue	42.5833		% nucleous Positive Tissue	50.423		% nucleous Positive Tissue	42.9336		% nucleous Positive Tissue	54.1992		% nucleous Positive Tissue	40.3091		% nucleous Positive Tissue	46.299
	% nucleous Positive Tissue (weak)	17.005		% nucleous Positive Tissue (weak)	17.6374		% nucleous Positive Tissue (weak)	15.0965		% nucleous Positive Tissue (weak)	18.731		% nucleous Positive Tissue (weak)	14.0993		% nucleous Positive Tissue (weak)	19.3441		% nucleous Positive Tissue (weak)	14.1841		% nucleous Positive Tissue (weak)	15.9267
	% nucleous Positive Tissue (moderate)	8.76055		% nucleous Positive Tissue (moderate)	10.1478		% nucleous Positive Tissue (moderate)	8.96356		% nucleous Positive Tissue (moderate)	11.4594		% nucleous Positive Tissue (moderate)	9.06163		% nucleous Positive Tissue (moderate)	11.2261		% nucleous Positive Tissue (moderate)	8.90634		% nucleous Positive Tissue (moderate)	10.6669
	% nucleous Positive Tissue (strong)	18.2277		% nucleous Positive Tissue (strong)	21.5284		% nucleous Positive Tissue (strong)	18.5232		% nucleous Positive Tissue (strong)	20.2326		% nucleous Positive Tissue (strong)	19.7726		% nucleous Positive Tissue (strong)	23.6289		% nucleous Positive Tissue (strong)	17.2186		% nucleous Positive Tissue (strong)	19.7054
	% cd31 Positive Tissue	0.815694		% cd31 Positive Tissue	0.368557		% cd31 Positive Tissue	0.880387		% cd31 Positive Tissue	0.797644		% cd31 Positive Tissue	0.5004		% cd31 Positive Tissue	1.33781		% cd31 Positive Tissue	0.80621		% cd31 Positive Tissue	0.54696
	% cd31 Positive Tissue (weak)	0.279853		% cd31 Positive Tissue (weak)	0.171559		% cd31 Positive Tissue (weak)	0.371983		% cd31 Positive Tissue (weak)	0.331727		% cd31 Positive Tissue (weak)	0.238474		% cd31 Positive Tissue (weak)	0.53061		% cd31 Positive Tissue (weak)	0.400641		% cd31 Positive Tissue (weak)	0.262709
	% cd31 Positive Tissue (moderate)	0.257734		% cd31 Positive Tissue (moderate)	0.123437		% cd31 Positive Tissue (moderate)	0.293766		% cd31 Positive Tissue (moderate)	0.268231		% cd31 Positive Tissue (moderate)	0.158953		% cd31 Positive Tissue (moderate)	0.439101		% cd31 Positive Tissue (moderate)	0.263466		% cd31 Positive Tissue (moderate)	0.174595
	% cd31 Positive Tissue (strong)	0.278106		% cd31 Positive Tissue (strong)	0.073561		% cd31 Positive Tissue (strong)	0.214638		% cd31 Positive Tissue (strong)	0.197687		% cd31 Positive Tissue (strong)	0.102973		% cd31 Positive Tissue (strong)	0.368103		% cd31 Positive Tissue (strong)	0.142104		% cd31 Positive Tissue (strong)	0.109656
	nucleous Average Positive Optical Density	0.355728		nucleous Average Positive Optical Density	0.359846		nucleous Average Positive Optical Density	0.360129		nucleous Average Positive Optical Density	0.346293		nucleous Average Positive Optical Density	0.372396		nucleous Average Positive Optical Density	0.363924		nucleous Average Positive Optical Density	0.354174		nucleous Average Positive Optical Density	0.356225
	cd31 Average Positive Optical Density	0.609733		cd31 Average Positive Optical Density	0.544914		cd31 Average Positive Optical Density	0.562799		cd31 Average Positive Optical Density	0.566922		cd31 Average Positive Optical Density	0.542138		cd31 Average Positive Optical Density	0.579986		cd31 Average Positive Optical Density	0.533746		cd31 Average Positive Optical Density	0.545188
	% Negative Tissue	55.3326		% Negative Tissue	50.4157		% Negative Tissue	56.6877		% Negative Tissue	48.9765		% Negative Tissue	56.6216		% Negative Tissue	44.6322		% Negative Tissue	59.0513		% Negative Tissue	53.2854
	tumour: Tissue Area Analyzed (μm²)	897929		tumour: Tissue Area Analyzed (μm²)	505253		tumour: Tissue Area Analyzed (μm²)	720701		tumour: Tissue Area Analyzed (μm²)	836380		tumour: Tissue Area Analyzed (μm²)	568562		tumour: Tissue Area Analyzed (μm²)	1.13857e+06		tumour: Tissue Area Analyzed (μm²)	811175		tumour: Tissue Area Analyzed (μm²)	650655
	tumour: nucleous Area (μm²)	395028		tumour: nucleous Area (μm²)	249158		tumour: nucleous Area (μm²)	306898		tumour: nucleous Area (μm²)	421728		tumour: nucleous Area (μm²)	244104		tumour: nucleous Area (μm²)	617094		tumour: nucleous Area (μm²)	326977		tumour: nucleous Area (μm²)	301247
	tumour: nucleous Weak Area (μm²)	152693		tumour: nucleous Weak Area (μm²)	89113.6		tumour: nucleous Weak Area (μm²)	108801		tumour: nucleous Weak Area (μm²)	156662		tumour: nucleous Weak Area (μm²)	80163.4		tumour: nucleous Weak Area (μm²)	220246		tumour: nucleous Weak Area (μm²)	115058		tumour: nucleous Weak Area (μm²)	103628
	tumour: nucleous Moderate Area (μm²)	78663.5		tumour: nucleous Moderate Area (μm²)	51272		tumour: nucleous Moderate Area (μm²)	64600.5		tumour: nucleous Moderate Area (μm²)	95843.9		tumour: nucleous Moderate Area (μm²)	51521		tumour: nucleous Moderate Area (μm²)	127817		tumour: nucleous Moderate Area (μm²)	72246		tumour: nucleous Moderate Area (μm²)	69404.4
	tumour: nucleous Strong Area (μm²)	163672		tumour: nucleous Strong Area (μm²)	108773		tumour: nucleous Strong Area (μm²)	133497		tumour: nucleous Strong Area (μm²)	169222		tumour: nucleous Strong Area (μm²)	112420		tumour: nucleous Strong Area (μm²)	269031		tumour: nucleous Strong Area (μm²)	139673		tumour: nucleous Strong Area (μm²)	128214
	tumour: cd31 Area (μm²)	7324.36		tumour: cd31 Area (μm²)	1862.15		tumour: cd31 Area (μm²)	6344.96		tumour: cd31 Area (μm²)	6671.34		tumour: cd31 Area (μm²)	2845.09		tumour: cd31 Area (μm²)	15231.9		tumour: cd31 Area (μm²)	6539.78		tumour: cd31 Area (μm²)	3558.82
	tumour: cd31 Weak Area (μm²)	2512.89		tumour: cd31 Weak Area (μm²)	866.809		tumour: cd31 Weak Area (μm²)	2680.88		tumour: cd31 Weak Area (μm²)	2774.5		tumour: cd31 Weak Area (μm²)	1355.88		tumour: cd31 Weak Area (μm²)	6041.35		tumour: cd31 Weak Area (μm²)	3249.9		tumour: cd31 Weak Area (μm²)	1709.33
	tumour: cd31 Moderate Area (μm²)	2314.27		tumour: cd31 Moderate Area (μm²)	623.667		tumour: cd31 Moderate Area (μm²)	2117.18		tumour: cd31 Moderate Area (μm²)	2243.43		tumour: cd31 Moderate Area (μm²)	903.748		tumour: cd31 Moderate Area (μm²)	4999.46		tumour: cd31 Moderate Area (μm²)	2137.17		tumour: cd31 Moderate Area (μm²)	1136.01
	tumour: cd31 Strong Area (μm²)	2497.2		tumour: cd31 Strong Area (μm²)	371.67		tumour: cd31 Strong Area (μm²)	1546.9		tumour: cd31 Strong Area (μm²)	1653.41		tumour: cd31 Strong Area (μm²)	585.463		tumour: cd31 Strong Area (μm²)	4191.09		tumour: cd31 Strong Area (μm²)	1152.71		tumour: cd31 Strong Area (μm²)	713.485
	tumour: % nucleous Positive Tissue	43.9932		tumour: % nucleous Positive Tissue	49.3136		tumour: % nucleous Positive Tissue	42.5833		tumour: % nucleous Positive Tissue	50.423		tumour: % nucleous Positive Tissue	42.9336		tumour: % nucleous Positive Tissue	54.1992		tumour: % nucleous Positive Tissue	40.3091		tumour: % nucleous Positive Tissue	46.299
	tumour: % nucleous Positive Tissue (weak)	17.005		tumour: % nucleous Positive Tissue (weak)	17.6374		tumour: % nucleous Positive Tissue (weak)	15.0965		tumour: % nucleous Positive Tissue (weak)	18.731		tumour: % nucleous Positive Tissue (weak)	14.0993		tumour: % nucleous Positive Tissue (weak)	19.3441		tumour: % nucleous Positive Tissue (weak)	14.1841		tumour: % nucleous Positive Tissue (weak)	15.9267
	tumour: % nucleous Positive Tissue (moderate)	8.76055		tumour: % nucleous Positive Tissue (moderate)	10.1478		tumour: % nucleous Positive Tissue (moderate)	8.96356		tumour: % nucleous Positive Tissue (moderate)	11.4594		tumour: % nucleous Positive Tissue (moderate)	9.06163		tumour: % nucleous Positive Tissue (moderate)	11.2261		tumour: % nucleous Positive Tissue (moderate)	8.90634		tumour: % nucleous Positive Tissue (moderate)	10.6669
	tumour: % nucleous Positive Tissue (strong)	18.2277		tumour: % nucleous Positive Tissue (strong)	21.5284		tumour: % nucleous Positive Tissue (strong)	18.5232		tumour: % nucleous Positive Tissue (strong)	20.2326		tumour: % nucleous Positive Tissue (strong)	19.7726		tumour: % nucleous Positive Tissue (strong)	23.6289		tumour: % nucleous Positive Tissue (strong)	17.2186		tumour: % nucleous Positive Tissue (strong)	19.7054
	tumour: % cd31 Positive Tissue	0.815694		tumour: % cd31 Positive Tissue	0.368557		tumour: % cd31 Positive Tissue	0.880387		tumour: % cd31 Positive Tissue	0.797644		tumour: % cd31 Positive Tissue	0.5004		tumour: % cd31 Positive Tissue	1.33781		tumour: % cd31 Positive Tissue	0.80621		tumour: % cd31 Positive Tissue	0.54696		0.756708
	tumour: % cd31 Positive Tissue (weak)	0.279853		tumour: % cd31 Positive Tissue (weak)	0.171559		tumour: % cd31 Positive Tissue (weak)	0.371983		tumour: % cd31 Positive Tissue (weak)	0.331727		tumour: % cd31 Positive Tissue (weak)	0.238474		tumour: % cd31 Positive Tissue (weak)	0.53061		tumour: % cd31 Positive Tissue (weak)	0.400641		tumour: % cd31 Positive Tissue (weak)	0.262709
	tumour: % cd31 Positive Tissue (moderate)	0.257734		tumour: % cd31 Positive Tissue (moderate)	0.123437		tumour: % cd31 Positive Tissue (moderate)	0.293766		tumour: % cd31 Positive Tissue (moderate)	0.268231		tumour: % cd31 Positive Tissue (moderate)	0.158953		tumour: % cd31 Positive Tissue (moderate)	0.439101		tumour: % cd31 Positive Tissue (moderate)	0.263466		tumour: % cd31 Positive Tissue (moderate)	0.174595
	tumour: % cd31 Positive Tissue (strong)	0.278106		tumour: % cd31 Positive Tissue (strong)	0.073561		tumour: % cd31 Positive Tissue (strong)	0.214638		tumour: % cd31 Positive Tissue (strong)	0.197687		tumour: % cd31 Positive Tissue (strong)	0.102973		tumour: % cd31 Positive Tissue (strong)	0.368103		tumour: % cd31 Positive Tissue (strong)	0.142104		tumour: % cd31 Positive Tissue (strong)	0.109656
	tumour: nucleous Average Positive Optical Density	0.355728		tumour: nucleous Average Positive Optical Density	0.359846		tumour: nucleous Average Positive Optical Density	0.360129		tumour: nucleous Average Positive Optical Density	0.346293		tumour: nucleous Average Positive Optical Density	0.372396		tumour: nucleous Average Positive Optical Density	0.363924		tumour: nucleous Average Positive Optical Density	0.354174		tumour: nucleous Average Positive Optical Density	0.356225
	tumour: cd31 Average Positive Optical Density	0.609733		tumour: cd31 Average Positive Optical Density	0.544914		tumour: cd31 Average Positive Optical Density	0.562799		tumour: cd31 Average Positive Optical Density	0.566922		tumour: cd31 Average Positive Optical Density	0.542138		tumour: cd31 Average Positive Optical Density	0.579986		tumour: cd31 Average Positive Optical Density	0.533746		tumour: cd31 Average Positive Optical Density	0.545188
	tumour: % Negative Tissue	55.3326		tumour: % Negative Tissue	50.4157		tumour: % Negative Tissue	56.6877		tumour: % Negative Tissue	48.9765		tumour: % Negative Tissue	56.6216		tumour: % Negative Tissue	44.6322		tumour: % Negative Tissue	59.0513		tumour: % Negative Tissue	53.2854
	BSNA8.2c	HOM
	Name	Value		Name	Value		Name	Value		Name	Value		Name	Value		Name	Value		Name	Value		Name	Value
	Classified Area (mm²)	0.92645		Classified Area (mm²)	0.55155		Classified Area (mm²)	0.89052		Classified Area (mm²)	0.62778		Classified Area (mm²)	1.19206		Classified Area (mm²)	0.78597		Classified Area (mm²)	0.77659		Classified Area (mm²)	1.13825
	tumour Area (mm²)	0.92637		tumour Area (mm²)	0.55155		tumour Area (mm²)	0.88986		tumour Area (mm²)	0.6255		tumour Area (mm²)	1.18782		tumour Area (mm²)	0.78512		tumour Area (mm²)	0.77659		tumour Area (mm²)	1.13603
	Necrosis Area (mm²)	0		Necrosis Area (mm²)	0		Necrosis Area (mm²)	0		Necrosis Area (mm²)	0		Necrosis Area (mm²)	0		Necrosis Area (mm²)	0		Necrosis Area (mm²)	0		Necrosis Area (mm²)	0
	Empty Area (mm²)	0		Empty Area (mm²)	0		Empty Area (mm²)	0.00066		Empty Area (mm²)	0.00162		Empty Area (mm²)	0.00425		Empty Area (mm²)	0.00074		Empty Area (mm²)	0		Empty Area (mm²)	0.00123
	Normal Area (mm²)	8e-05		Normal Area (mm²)	0		Normal Area (mm²)	0		Normal Area (mm²)	0.00066		Normal Area (mm²)	0		Normal Area (mm²)	0.00011		Normal Area (mm²)	0		Normal Area (mm²)	0.00099
	Tissue Area Analyzed (μm²)	925070		Tissue Area Analyzed (μm²)	550321		Tissue Area Analyzed (μm²)	884389		Tissue Area Analyzed (μm²)	624166		Tissue Area Analyzed (μm²)	1.18108e+06		Tissue Area Analyzed (μm²)	783234		Tissue Area Analyzed (μm²)	774812		Tissue Area Analyzed (μm²)	1.11667e+06
	nucleous Area (μm²)	701284		nucleous Area (μm²)	311369		nucleous Area (μm²)	524860		nucleous Area (μm²)	329473		nucleous Area (μm²)	511289		nucleous Area (μm²)	474014		nucleous Area (μm²)	434948		nucleous Area (μm²)	579908
	nucleous Weak Area (μm²)	273576		nucleous Weak Area (μm²)	128824		nucleous Weak Area (μm²)	194943		nucleous Weak Area (μm²)	130950		nucleous Weak Area (μm²)	192501		nucleous Weak Area (μm²)	189505		nucleous Weak Area (μm²)	168521		nucleous Weak Area (μm²)	221990
	nucleous Moderate Area (μm²)	131920		nucleous Moderate Area (μm²)	63530.8		nucleous Moderate Area (μm²)	120082		nucleous Moderate Area (μm²)	78340.7		nucleous Moderate Area (μm²)	109971		nucleous Moderate Area (μm²)	94879.9		nucleous Moderate Area (μm²)	87327.3		nucleous Moderate Area (μm²)	122898
	nucleous Strong Area (μm²)	295788		nucleous Strong Area (μm²)	119015		nucleous Strong Area (μm²)	209835		nucleous Strong Area (μm²)	120182		nucleous Strong Area (μm²)	208817		nucleous Strong Area (μm²)	189629		nucleous Strong Area (μm²)	179100		nucleous Strong Area (μm²)	235020
	cd31 Area (μm²)	1925.4		cd31 Area (μm²)	5164.67		cd31 Area (μm²)	4650.56		cd31 Area (μm²)	5306.1		cd31 Area (μm²)	5010.08		cd31 Area (μm²)	7924.5		cd31 Area (μm²)	7486.28		cd31 Area (μm²)	3217.52
	cd31 Weak Area (μm²)	930.82		cd31 Weak Area (μm²)	2178.41		cd31 Weak Area (μm²)	2008.39		cd31 Weak Area (μm²)	2120.72		cd31 Weak Area (μm²)	2448.87		cd31 Weak Area (μm²)	3184.62		cd31 Weak Area (μm²)	3214.73		cd31 Weak Area (μm²)	1500.6
	cd31 Moderate Area (μm²)	613.547		cd31 Moderate Area (μm²)	1674.41		cd31 Moderate Area (μm²)	1527.92		cd31 Moderate Area (μm²)	1761.2		cd31 Moderate Area (μm²)	1634.94		cd31 Moderate Area (μm²)	2629.78		cd31 Moderate Area (μm²)	2506.56		cd31 Moderate Area (μm²)	1059.6
	cd31 Strong Area (μm²)	381.032		cd31 Strong Area (μm²)	1311.85		cd31 Strong Area (μm²)	1114.25		cd31 Strong Area (μm²)	1424.19		cd31 Strong Area (μm²)	926.266		cd31 Strong Area (μm²)	2110.09		cd31 Strong Area (μm²)	1764.99		cd31 Strong Area (μm²)	657.317
	% nucleous Positive Tissue	75.8087		% nucleous Positive Tissue	56.5795		% nucleous Positive Tissue	59.3471		% nucleous Positive Tissue	52.7862		% nucleous Positive Tissue	43.29		% nucleous Positive Tissue	60.5201		% nucleous Positive Tissue	56.1359		% nucleous Positive Tissue	51.9319
	% nucleous Positive Tissue (weak)	29.5735		% nucleous Positive Tissue (weak)	23.4088		% nucleous Positive Tissue (weak)	22.0427		% nucleous Positive Tissue (weak)	20.98		% nucleous Positive Tissue (weak)	16.2988		% nucleous Positive Tissue (weak)	24.1952		% nucleous Positive Tissue (weak)	21.7499		% nucleous Positive Tissue (weak)	19.8796
	% nucleous Positive Tissue (moderate)	14.2605		% nucleous Positive Tissue (moderate)	11.5443		% nucleous Positive Tissue (moderate)	13.5779		% nucleous Positive Tissue (moderate)	12.5513		% nucleous Positive Tissue (moderate)	9.31107		% nucleous Positive Tissue (moderate)	12.1139		% nucleous Positive Tissue (moderate)	11.2708		% nucleous Positive Tissue (moderate)	11.0058
	% nucleous Positive Tissue (strong)	31.9746		% nucleous Positive Tissue (strong)	21.6264		% nucleous Positive Tissue (strong)	23.7265		% nucleous Positive Tissue (strong)	19.2549		% nucleous Positive Tissue (strong)	17.6802		% nucleous Positive Tissue (strong)	24.2111		% nucleous Positive Tissue (strong)	23.1152		% nucleous Positive Tissue (strong)	21.0465
	% cd31 Positive Tissue	0.208135		% cd31 Positive Tissue	0.938483		% cd31 Positive Tissue	0.52585		% cd31 Positive Tissue	0.850112		% cd31 Positive Tissue	0.424195		% cd31 Positive Tissue	1.01177		% cd31 Positive Tissue	0.966206		% cd31 Positive Tissue	0.288135
	% cd31 Positive Tissue (weak)	0.100622		% cd31 Positive Tissue (weak)	0.395843		% cd31 Positive Tissue (weak)	0.227093		% cd31 Positive Tissue (weak)	0.339769		% cd31 Positive Tissue (weak)	0.207342		% cd31 Positive Tissue (weak)	0.4066		% cd31 Positive Tissue (weak)	0.414905		% cd31 Positive Tissue (weak)	0.134381
	% cd31 Positive Tissue (moderate)	0.066324		% cd31 Positive Tissue (moderate)	0.304261		% cd31 Positive Tissue (moderate)	0.172766		% cd31 Positive Tissue (moderate)	0.282168		% cd31 Positive Tissue (moderate)	0.138428		% cd31 Positive Tissue (moderate)	0.335759		% cd31 Positive Tissue (moderate)	0.323505		% cd31 Positive Tissue (moderate)	0.094889
	% cd31 Positive Tissue (strong)	0.041189		% cd31 Positive Tissue (strong)	0.238379		% cd31 Positive Tissue (strong)	0.125991		% cd31 Positive Tissue (strong)	0.228175		% cd31 Positive Tissue (strong)	0.078425		% cd31 Positive Tissue (strong)	0.269408		% cd31 Positive Tissue (strong)	0.227796		% cd31 Positive Tissue (strong)	0.058864
	nucleous Average Positive Optical Density	0.363681		nucleous Average Positive Optical Density	0.339038		nucleous Average Positive Optical Density	0.337392		nucleous Average Positive Optical Density	0.325601		nucleous Average Positive Optical Density	0.34955		nucleous Average Positive Optical Density	0.351246		nucleous Average Positive Optical Density	0.356123		nucleous Average Positive Optical Density	0.349623
	cd31 Average Positive Optical Density	0.543749		cd31 Average Positive Optical Density	0.572087		cd31 Average Positive Optical Density	0.56477		cd31 Average Positive Optical Density	0.576979		cd31 Average Positive Optical Density	0.537964		cd31 Average Positive Optical Density	0.574771		cd31 Average Positive Optical Density	0.560984		cd31 Average Positive Optical Density	0.547567
	% Negative Tissue	24.0627		% Negative Tissue	42.731		% Negative Tissue	40.3281		% Negative Tissue	46.6731		% Negative Tissue	56.3554		% Negative Tissue	38.7966		% Negative Tissue	43.1677		% Negative Tissue	47.8736
	tumour: Tissue Area Analyzed (μm²)	925070		tumour: Tissue Area Analyzed (μm²)	550321		tumour: Tissue Area Analyzed (μm²)	884389		tumour: Tissue Area Analyzed (μm²)	624166		tumour: Tissue Area Analyzed (μm²)	1.18108e+06		tumour: Tissue Area Analyzed (μm²)	783234		tumour: Tissue Area Analyzed (μm²)	774812		tumour: Tissue Area Analyzed (μm²)	1.11667e+06
	tumour: nucleous Area (μm²)	701284		tumour: nucleous Area (μm²)	311369		tumour: nucleous Area (μm²)	524860		tumour: nucleous Area (μm²)	329473		tumour: nucleous Area (μm²)	511289		tumour: nucleous Area (μm²)	474014		tumour: nucleous Area (μm²)	434948		tumour: nucleous Area (μm²)	579908
	tumour: nucleous Weak Area (μm²)	273576		tumour: nucleous Weak Area (μm²)	128824		tumour: nucleous Weak Area (μm²)	194943		tumour: nucleous Weak Area (μm²)	130950		tumour: nucleous Weak Area (μm²)	192501		tumour: nucleous Weak Area (μm²)	189505		tumour: nucleous Weak Area (μm²)	168521		tumour: nucleous Weak Area (μm²)	221990
	tumour: nucleous Moderate Area (μm²)	131920		tumour: nucleous Moderate Area (μm²)	63530.8		tumour: nucleous Moderate Area (μm²)	120082		tumour: nucleous Moderate Area (μm²)	78340.7		tumour: nucleous Moderate Area (μm²)	109971		tumour: nucleous Moderate Area (μm²)	94879.9		tumour: nucleous Moderate Area (μm²)	87327.3		tumour: nucleous Moderate Area (μm²)	122898
	tumour: nucleous Strong Area (μm²)	295788		tumour: nucleous Strong Area (μm²)	119015		tumour: nucleous Strong Area (μm²)	209835		tumour: nucleous Strong Area (μm²)	120182		tumour: nucleous Strong Area (μm²)	208817		tumour: nucleous Strong Area (μm²)	189629		tumour: nucleous Strong Area (μm²)	179100		tumour: nucleous Strong Area (μm²)	235020
	tumour: cd31 Area (μm²)	1925.4		tumour: cd31 Area (μm²)	5164.67		tumour: cd31 Area (μm²)	4650.56		tumour: cd31 Area (μm²)	5306.1		tumour: cd31 Area (μm²)	5010.08		tumour: cd31 Area (μm²)	7924.5		tumour: cd31 Area (μm²)	7486.28		tumour: cd31 Area (μm²)	3217.52
	tumour: cd31 Weak Area (μm²)	930.82		tumour: cd31 Weak Area (μm²)	2178.41		tumour: cd31 Weak Area (μm²)	2008.39		tumour: cd31 Weak Area (μm²)	2120.72		tumour: cd31 Weak Area (μm²)	2448.87		tumour: cd31 Weak Area (μm²)	3184.62		tumour: cd31 Weak Area (μm²)	3214.73		tumour: cd31 Weak Area (μm²)	1500.6
	tumour: cd31 Moderate Area (μm²)	613.547		tumour: cd31 Moderate Area (μm²)	1674.41		tumour: cd31 Moderate Area (μm²)	1527.92		tumour: cd31 Moderate Area (μm²)	1761.2	0	tumour: cd31 Moderate Area (μm²)	1634.94		tumour: cd31 Moderate Area (μm²)	2629.78		tumour: cd31 Moderate Area (μm²)	2506.56		tumour: cd31 Moderate Area (μm²)	1059.6
	tumour: cd31 Strong Area (μm²)	381.032		tumour: cd31 Strong Area (μm²)	1311.85		tumour: cd31 Strong Area (μm²)	1114.25		tumour: cd31 Strong Area (μm²)	1424.19		tumour: cd31 Strong Area (μm²)	926.266		tumour: cd31 Strong Area (μm²)	2110.09		tumour: cd31 Strong Area (μm²)	1764.99		tumour: cd31 Strong Area (μm²)	657.317
	tumour: % nucleous Positive Tissue	75.8087		tumour: % nucleous Positive Tissue	56.5795		tumour: % nucleous Positive Tissue	59.3471		tumour: % nucleous Positive Tissue	52.7862		tumour: % nucleous Positive Tissue	43.29		tumour: % nucleous Positive Tissue	60.5201		tumour: % nucleous Positive Tissue	56.1359		tumour: % nucleous Positive Tissue	51.9319
	tumour: % nucleous Positive Tissue (weak)	29.5735		tumour: % nucleous Positive Tissue (weak)	23.4088		tumour: % nucleous Positive Tissue (weak)	22.0427		tumour: % nucleous Positive Tissue (weak)	20.98		tumour: % nucleous Positive Tissue (weak)	16.2988		tumour: % nucleous Positive Tissue (weak)	24.1952		tumour: % nucleous Positive Tissue (weak)	21.7499		tumour: % nucleous Positive Tissue (weak)	19.8796
	tumour: % nucleous Positive Tissue (moderate)	14.2605		tumour: % nucleous Positive Tissue (moderate)	11.5443		tumour: % nucleous Positive Tissue (moderate)	13.5779		tumour: % nucleous Positive Tissue (moderate)	12.5513		tumour: % nucleous Positive Tissue (moderate)	9.31107		tumour: % nucleous Positive Tissue (moderate)	12.1139		tumour: % nucleous Positive Tissue (moderate)	11.2708		tumour: % nucleous Positive Tissue (moderate)	11.0058
	tumour: % nucleous Positive Tissue (strong)	31.9746		tumour: % nucleous Positive Tissue (strong)	21.6264		tumour: % nucleous Positive Tissue (strong)	23.7265		tumour: % nucleous Positive Tissue (strong)	19.2549		tumour: % nucleous Positive Tissue (strong)	17.6802		tumour: % nucleous Positive Tissue (strong)	24.2111		tumour: % nucleous Positive Tissue (strong)	23.1152		tumour: % nucleous Positive Tissue (strong)	21.0465
	tumour: % cd31 Positive Tissue	0.208135		tumour: % cd31 Positive Tissue	0.938483		tumour: % cd31 Positive Tissue	0.52585		tumour: % cd31 Positive Tissue	0.850112		tumour: % cd31 Positive Tissue	0.424195		tumour: % cd31 Positive Tissue	1.01177		tumour: % cd31 Positive Tissue	0.966206		tumour: % cd31 Positive Tissue	0.288135		0.65161
	tumour: % cd31 Positive Tissue (weak)	0.100622		tumour: % cd31 Positive Tissue (weak)	0.395843		tumour: % cd31 Positive Tissue (weak)	0.227093		tumour: % cd31 Positive Tissue (weak)	0.339769		tumour: % cd31 Positive Tissue (weak)	0.207342		tumour: % cd31 Positive Tissue (weak)	0.4066		tumour: % cd31 Positive Tissue (weak)	0.414905		tumour: % cd31 Positive Tissue (weak)	0.134381
	tumour: % cd31 Positive Tissue (moderate)	0.066324		tumour: % cd31 Positive Tissue (moderate)	0.304261		tumour: % cd31 Positive Tissue (moderate)	0.172766		tumour: % cd31 Positive Tissue (moderate)	0.282168		tumour: % cd31 Positive Tissue (moderate)	0.138428		tumour: % cd31 Positive Tissue (moderate)	0.335759		tumour: % cd31 Positive Tissue (moderate)	0.323505		tumour: % cd31 Positive Tissue (moderate)	0.094889
	tumour: % cd31 Positive Tissue (strong)	0.041189		tumour: % cd31 Positive Tissue (strong)	0.238379		tumour: % cd31 Positive Tissue (strong)	0.125991		tumour: % cd31 Positive Tissue (strong)	0.228175		tumour: % cd31 Positive Tissue (strong)	0.078425		tumour: % cd31 Positive Tissue (strong)	0.269408		tumour: % cd31 Positive Tissue (strong)	0.227796		tumour: % cd31 Positive Tissue (strong)	0.058864
	tumour: nucleous Average Positive Optical Density	0.363681		tumour: nucleous Average Positive Optical Density	0.339038		tumour: nucleous Average Positive Optical Density	0.337392		tumour: nucleous Average Positive Optical Density	0.325601		tumour: nucleous Average Positive Optical Density	0.34955		tumour: nucleous Average Positive Optical Density	0.351246		tumour: nucleous Average Positive Optical Density	0.356123		tumour: nucleous Average Positive Optical Density	0.349623
	tumour: cd31 Average Positive Optical Density	0.543749		tumour: cd31 Average Positive Optical Density	0.572087		tumour: cd31 Average Positive Optical Density	0.56477		tumour: cd31 Average Positive Optical Density	0.576979		tumour: cd31 Average Positive Optical Density	0.537964		tumour: cd31 Average Positive Optical Density	0.574771		tumour: cd31 Average Positive Optical Density	0.560984		tumour: cd31 Average Positive Optical Density	0.547567
	tumour: % Negative Tissue	24.0627		tumour: % Negative Tissue	42.731		tumour: % Negative Tissue	40.3281		tumour: % Negative Tissue	46.6731		tumour: % Negative Tissue	56.3554		tumour: % Negative Tissue	38.7966		tumour: % Negative Tissue	43.1677		tumour: % Negative Tissue	47.8736
	BSNA19.1b	HOM
	Name	Value		Name	Value		Name	Value		Name	Value		Name	Value		Name	Value		Name	Value		Name	Value
	Classified Area (mm²)	0.88951		Classified Area (mm²)	1.27059		Classified Area (mm²)	0.46139		Classified Area (mm²)	1.15179		Classified Area (mm²)	1.04452		Classified Area (mm²)	0.96133		Classified Area (mm²)	0.60508		Classified Area (mm²)	0.75478
	tumour Area (mm²)	0.88892		tumour Area (mm²)	1.27053		tumour Area (mm²)	0.46139		tumour Area (mm²)	1.13806		tumour Area (mm²)	1.04247		tumour Area (mm²)	0.93608		tumour Area (mm²)	0.60508		tumour Area (mm²)	0.75147
	Necrosis Area (mm²)	0		Necrosis Area (mm²)	0		Necrosis Area (mm²)	0		Necrosis Area (mm²)	0		Necrosis Area (mm²)	0		Necrosis Area (mm²)	0.00037		Necrosis Area (mm²)	0		Necrosis Area (mm²)	0
	Empty Area (mm²)	0.00059		Empty Area (mm²)	6e-05		Empty Area (mm²)	0		Empty Area (mm²)	0.01373		Empty Area (mm²)	0.00205		Empty Area (mm²)	0.0223		Empty Area (mm²)	0		Empty Area (mm²)	0.00311
	Normal Area (mm²)	0		Normal Area (mm²)	0		Normal Area (mm²)	0		Normal Area (mm²)	0		Normal Area (mm²)	0		Normal Area (mm²)	0.00258		Normal Area (mm²)	0		Normal Area (mm²)	0.00021
	Tissue Area Analyzed (μm²)	884422		Tissue Area Analyzed (μm²)	1.26586e+06		Tissue Area Analyzed (μm²)	459734		Tissue Area Analyzed (μm²)	1125928		Tissue Area Analyzed (μm²)	1.02749e+06		Tissue Area Analyzed (μm²)	923608		Tissue Area Analyzed (μm²)	602644		Tissue Area Analyzed (μm²)	742195
	nucleous Area (μm²)	499767		nucleous Area (μm²)	654373		nucleous Area (μm²)	276474		nucleous Area (μm²)	572552		nucleous Area (μm²)	456132		nucleous Area (μm²)	478731		nucleous Area (μm²)	267207		nucleous Area (μm²)	306692
	nucleous Weak Area (μm²)	163772		nucleous Weak Area (μm²)	217108		nucleous Weak Area (μm²)	88853.2		nucleous Weak Area (μm²)	191577		nucleous Weak Area (μm²)	159907		nucleous Weak Area (μm²)	157475		nucleous Weak Area (μm²)	96699		nucleous Weak Area (μm²)	115753
	nucleous Moderate Area (μm²)	107321		nucleous Moderate Area (μm²)	146589		nucleous Moderate Area (μm²)	54834.4		nucleous Moderate Area (μm²)	116422		nucleous Moderate Area (μm²)	96043		nucleous Moderate Area (μm²)	97116.5		nucleous Moderate Area (μm²)	61191.2		nucleous Moderate Area (μm²)	65222.7
	nucleous Strong Area (μm²)	228674		nucleous Strong Area (μm²)	290676		nucleous Strong Area (μm²)	132786		nucleous Strong Area (μm²)	264552		nucleous Strong Area (μm²)	200182		nucleous Strong Area (μm²)	224139		nucleous Strong Area (μm²)	109317		nucleous Strong Area (μm²)	125716
	cd31 Area (μm²)	3922.4		cd31 Area (μm²)	12723.8		cd31 Area (μm²)	3412.08		cd31 Area (μm²)	18575.2		cd31 Area (μm²)	11862.1		cd31 Area (μm²)	13442.1		cd31 Area (μm²)	4353.27		cd31 Area (μm²)	14377.5
	cd31 Weak Area (μm²)	1927.93		cd31 Weak Area (μm²)	4749.99		cd31 Weak Area (μm²)	1139.3		cd31 Weak Area (μm²)	6139.52		cd31 Weak Area (μm²)	4436.01		cd31 Weak Area (μm²)	4821.85		cd31 Weak Area (μm²)	1657.46		cd31 Weak Area (μm²)	3798.17
	cd31 Moderate Area (μm²)	1232.91		cd31 Moderate Area (μm²)	4006.65		cd31 Moderate Area (μm²)	1024.69		cd31 Moderate Area (μm²)	5662.59		cd31 Moderate Area (μm²)	3940.36		cd31 Moderate Area (μm²)	4365.16		cd31 Moderate Area (μm²)	1381.18		cd31 Moderate Area (μm²)	3707.09
	cd31 Strong Area (μm²)	761.557		cd31 Strong Area (μm²)	3967.18		cd31 Strong Area (μm²)	1248.09		cd31 Strong Area (μm²)	6773.05		cd31 Strong Area (μm²)	3485.71		cd31 Strong Area (μm²)	4255.11		cd31 Strong Area (μm²)	1314.63		cd31 Strong Area (μm²)	6872.23
	% nucleous Positive Tissue	56.5078		% nucleous Positive Tissue	51.694		% nucleous Positive Tissue	60.1379		% nucleous Positive Tissue	50.8515		% nucleous Positive Tissue	44.3928		% nucleous Positive Tissue	51.8327		% nucleous Positive Tissue	44.3391		% nucleous Positive Tissue	41.3222
	% nucleous Positive Tissue (weak)	18.5174		% nucleous Positive Tissue (weak)	17.1511		% nucleous Positive Tissue (weak)	19.3271		% nucleous Positive Tissue (weak)	17.015		% nucleous Positive Tissue (weak)	15.5628		% nucleous Positive Tissue (weak)	17.05		% nucleous Positive Tissue (weak)	16.0458		% nucleous Positive Tissue (weak)	15.596
	% nucleous Positive Tissue (moderate)	12.1346		% nucleous Positive Tissue (moderate)	11.5802		% nucleous Positive Tissue (moderate)	11.9274		% nucleous Positive Tissue (moderate)	10.3401		% nucleous Positive Tissue (moderate)	9.34733		% nucleous Positive Tissue (moderate)	10.5149		% nucleous Positive Tissue (moderate)	10.1538		% nucleous Positive Tissue (moderate)	8.78781
	% nucleous Positive Tissue (strong)	25.8558		% nucleous Positive Tissue (strong)	22.9628		% nucleous Positive Tissue (strong)	28.8833		% nucleous Positive Tissue (strong)	23.4964		% nucleous Positive Tissue (strong)	19.4826		% nucleous Positive Tissue (strong)	24.2678		% nucleous Positive Tissue (strong)	18.1395		% nucleous Positive Tissue (strong)	16.9384
	% cd31 Positive Tissue	0.443499		% cd31 Positive Tissue	1.00515		% cd31 Positive Tissue	0.742186		% cd31 Positive Tissue	1.64976		% cd31 Positive Tissue	1.15447		% cd31 Positive Tissue	1.45539		% cd31 Positive Tissue	0.722362		% cd31 Positive Tissue	1.93716
	% cd31 Positive Tissue (weak)	0.217988		% cd31 Positive Tissue (weak)	0.375239		% cd31 Positive Tissue (weak)	0.247817		% cd31 Positive Tissue (weak)	0.545285		% cd31 Positive Tissue (weak)	0.431732		% cd31 Positive Tissue (weak)	0.522066		% cd31 Positive Tissue (weak)	0.275032		% cd31 Positive Tissue (weak)	0.511748
	% cd31 Positive Tissue (moderate)	0.139403		% cd31 Positive Tissue (moderate)	0.316517		% cd31 Positive Tissue (moderate)	0.222887		% cd31 Positive Tissue (moderate)	0.502927		% cd31 Positive Tissue (moderate)	0.383493		% cd31 Positive Tissue (moderate)	0.472621		% cd31 Positive Tissue (moderate)	0.229186		% cd31 Positive Tissue (moderate)	0.499476
	% cd31 Positive Tissue (strong)	0.086108		% cd31 Positive Tissue (strong)	0.313399		% cd31 Positive Tissue (strong)	0.271482		% cd31 Positive Tissue (strong)	0.601553		% cd31 Positive Tissue (strong)	0.339244		% cd31 Positive Tissue (strong)	0.460705		% cd31 Positive Tissue (strong)	0.218144		% cd31 Positive Tissue (strong)	0.925933
	nucleous Average Positive Optical Density	0.372935		nucleous Average Positive Optical Density	0.365664		nucleous Average Positive Optical Density	0.391794		nucleous Average Positive Optical Density	0.390316		nucleous Average Positive Optical Density	0.377901		nucleous Average Positive Optical Density	0.397492		nucleous Average Positive Optical Density	0.349001		nucleous Average Positive Optical Density	0.36353
	cd31 Average Positive Optical Density	0.54089		cd31 Average Positive Optical Density	0.595927		cd31 Average Positive Optical Density	0.62864		cd31 Average Positive Optical Density	0.628224		cd31 Average Positive Optical Density	0.587879		cd31 Average Positive Optical Density	0.602405		cd31 Average Positive Optical Density	0.599301		cd31 Average Positive Optical Density	0.729748
	% Negative Tissue	43.1671		% Negative Tissue	47.5835		% Negative Tissue	39.3634		% Negative Tissue	47.9185		% Negative Tissue	54.7534		% Negative Tissue	47.149		% Negative Tissue	55.1702		% Negative Tissue	57.2766
	tumour: Tissue Area Analyzed (μm²)	884422		tumour: Tissue Area Analyzed (μm²)	1.26586e+06		tumour: Tissue Area Analyzed (μm²)	459734		tumour: Tissue Area Analyzed (μm²)	1125928		tumour: Tissue Area Analyzed (μm²)	1.02749e+06		tumour: Tissue Area Analyzed (μm²)	923608		tumour: Tissue Area Analyzed (μm²)	602644		tumour: Tissue Area Analyzed (μm²)	742195
	tumour: nucleous Area (μm²)	499767		tumour: nucleous Area (μm²)	654373		tumour: nucleous Area (μm²)	276474		tumour: nucleous Area (μm²)	572552		tumour: nucleous Area (μm²)	456132		tumour: nucleous Area (μm²)	478731		tumour: nucleous Area (μm²)	267207		tumour: nucleous Area (μm²)	306692
	tumour: nucleous Weak Area (μm²)	163772		tumour: nucleous Weak Area (μm²)	217108		tumour: nucleous Weak Area (μm²)	88853.2		tumour: nucleous Weak Area (μm²)	191577		tumour: nucleous Weak Area (μm²)	159907		tumour: nucleous Weak Area (μm²)	157475		tumour: nucleous Weak Area (μm²)	96699		tumour: nucleous Weak Area (μm²)	115753
	tumour: nucleous Moderate Area (μm²)	107321		tumour: nucleous Moderate Area (μm²)	146589		tumour: nucleous Moderate Area (μm²)	54834.4		tumour: nucleous Moderate Area (μm²)	116422		tumour: nucleous Moderate Area (μm²)	96043		tumour: nucleous Moderate Area (μm²)	97116.5		tumour: nucleous Moderate Area (μm²)	61191.2		tumour: nucleous Moderate Area (μm²)	65222.7
	tumour: nucleous Strong Area (μm²)	228674		tumour: nucleous Strong Area (μm²)	290676		tumour: nucleous Strong Area (μm²)	132786		tumour: nucleous Strong Area (μm²)	264552		tumour: nucleous Strong Area (μm²)	200182		tumour: nucleous Strong Area (μm²)	224139		tumour: nucleous Strong Area (μm²)	109317		tumour: nucleous Strong Area (μm²)	125716
	tumour: cd31 Area (μm²)	3922.4		tumour: cd31 Area (μm²)	12723.8		tumour: cd31 Area (μm²)	3412.08		tumour: cd31 Area (μm²)	18575.2		tumour: cd31 Area (μm²)	11862.1		tumour: cd31 Area (μm²)	13442.1		tumour: cd31 Area (μm²)	4353.27		tumour: cd31 Area (μm²)	14377.5
	tumour: cd31 Weak Area (μm²)	1927.93		tumour: cd31 Weak Area (μm²)	4749.99		tumour: cd31 Weak Area (μm²)	1139.3		tumour: cd31 Weak Area (μm²)	6139.52		tumour: cd31 Weak Area (μm²)	4436.01		tumour: cd31 Weak Area (μm²)	4821.85		tumour: cd31 Weak Area (μm²)	1657.46		tumour: cd31 Weak Area (μm²)	3798.17
	tumour: cd31 Moderate Area (μm²)	1232.91		tumour: cd31 Moderate Area (μm²)	4006.65		tumour: cd31 Moderate Area (μm²)	1024.69		tumour: cd31 Moderate Area (μm²)	5662.59		tumour: cd31 Moderate Area (μm²)	3940.36		tumour: cd31 Moderate Area (μm²)	4365.16		tumour: cd31 Moderate Area (μm²)	1381.18		tumour: cd31 Moderate Area (μm²)	3707.09
	tumour: cd31 Strong Area (μm²)	761.557		tumour: cd31 Strong Area (μm²)	3967.18		tumour: cd31 Strong Area (μm²)	1248.09		tumour: cd31 Strong Area (μm²)	6773.05		tumour: cd31 Strong Area (μm²)	3485.71		tumour: cd31 Strong Area (μm²)	4255.11		tumour: cd31 Strong Area (μm²)	1314.63		tumour: cd31 Strong Area (μm²)	6872.23
	tumour: % nucleous Positive Tissue	56.5078		tumour: % nucleous Positive Tissue	51.694		tumour: % nucleous Positive Tissue	60.1379		tumour: % nucleous Positive Tissue	50.8515		tumour: % nucleous Positive Tissue	44.3928		tumour: % nucleous Positive Tissue	51.8327		tumour: % nucleous Positive Tissue	44.3391		tumour: % nucleous Positive Tissue	41.3222
	tumour: % nucleous Positive Tissue (weak)	18.5174		tumour: % nucleous Positive Tissue (weak)	17.1511		tumour: % nucleous Positive Tissue (weak)	19.3271		tumour: % nucleous Positive Tissue (weak)	17.015		tumour: % nucleous Positive Tissue (weak)	15.5628		tumour: % nucleous Positive Tissue (weak)	17.05		tumour: % nucleous Positive Tissue (weak)	16.0458		tumour: % nucleous Positive Tissue (weak)	15.596
	tumour: % nucleous Positive Tissue (moderate)	12.1346		tumour: % nucleous Positive Tissue (moderate)	11.5802		tumour: % nucleous Positive Tissue (moderate)	11.9274		tumour: % nucleous Positive Tissue (moderate)	10.3401		tumour: % nucleous Positive Tissue (moderate)	9.34733		tumour: % nucleous Positive Tissue (moderate)	10.5149		tumour: % nucleous Positive Tissue (moderate)	10.1538		tumour: % nucleous Positive Tissue (moderate)	8.78781
	tumour: % nucleous Positive Tissue (strong)	25.8558		tumour: % nucleous Positive Tissue (strong)	22.9628		tumour: % nucleous Positive Tissue (strong)	28.8833		tumour: % nucleous Positive Tissue (strong)	23.4964		tumour: % nucleous Positive Tissue (strong)	19.4826		tumour: % nucleous Positive Tissue (strong)	24.2678		tumour: % nucleous Positive Tissue (strong)	18.1395		tumour: % nucleous Positive Tissue (strong)	16.9384
	tumour: % cd31 Positive Tissue	0.443499		tumour: % cd31 Positive Tissue	1.00515		tumour: % cd31 Positive Tissue	0.742186		tumour: % cd31 Positive Tissue	1.64976		tumour: % cd31 Positive Tissue	1.15447		tumour: % cd31 Positive Tissue	1.45539		tumour: % cd31 Positive Tissue	0.722362		tumour: % cd31 Positive Tissue	1.93716		1.13875
	tumour: % cd31 Positive Tissue (weak)	0.217988		tumour: % cd31 Positive Tissue (weak)	0.375239		tumour: % cd31 Positive Tissue (weak)	0.247817		tumour: % cd31 Positive Tissue (weak)	0.545285		tumour: % cd31 Positive Tissue (weak)	0.431732		tumour: % cd31 Positive Tissue (weak)	0.522066		tumour: % cd31 Positive Tissue (weak)	0.275032		tumour: % cd31 Positive Tissue (weak)	0.511748
	tumour: % cd31 Positive Tissue (moderate)	0.139403		tumour: % cd31 Positive Tissue (moderate)	0.316517		tumour: % cd31 Positive Tissue (moderate)	0.222887		tumour: % cd31 Positive Tissue (moderate)	0.502927		tumour: % cd31 Positive Tissue (moderate)	0.383493		tumour: % cd31 Positive Tissue (moderate)	0.472621		tumour: % cd31 Positive Tissue (moderate)	0.229186		tumour: % cd31 Positive Tissue (moderate)	0.499476
	tumour: % cd31 Positive Tissue (strong)	0.086108		tumour: % cd31 Positive Tissue (strong)	0.313399		tumour: % cd31 Positive Tissue (strong)	0.271482		tumour: % cd31 Positive Tissue (strong)	0.601553		tumour: % cd31 Positive Tissue (strong)	0.339244		tumour: % cd31 Positive Tissue (strong)	0.460705		tumour: % cd31 Positive Tissue (strong)	0.218144		tumour: % cd31 Positive Tissue (strong)	0.925933
	tumour: nucleous Average Positive Optical Density	0.372935		tumour: nucleous Average Positive Optical Density	0.365664		tumour: nucleous Average Positive Optical Density	0.391794		tumour: nucleous Average Positive Optical Density	0.390316		tumour: nucleous Average Positive Optical Density	0.377901		tumour: nucleous Average Positive Optical Density	0.397492		tumour: nucleous Average Positive Optical Density	0.349001		tumour: nucleous Average Positive Optical Density	0.36353
	tumour: cd31 Average Positive Optical Density	0.54089		tumour: cd31 Average Positive Optical Density	0.595927		tumour: cd31 Average Positive Optical Density	0.62864		tumour: cd31 Average Positive Optical Density	0.628224		tumour: cd31 Average Positive Optical Density	0.587879		tumour: cd31 Average Positive Optical Density	0.602405		tumour: cd31 Average Positive Optical Density	0.599301		tumour: cd31 Average Positive Optical Density	0.729748
	tumour: % Negative Tissue	43.1671		tumour: % Negative Tissue	47.5835		tumour: % Negative Tissue	39.3634		tumour: % Negative Tissue	47.9185		tumour: % Negative Tissue	54.7534		tumour: % Negative Tissue	47.149		tumour: % Negative Tissue	55.1702		tumour: % Negative Tissue	57.2766
	BSNA15.1a	HOM
	Name	Value		Name	Value		Name	Value		Name	Value		Name	Value		Name	Value		Name	Value		Name	Value
	Classified Area (mm²)	0.57888		Classified Area (mm²)	0.51402		Classified Area (mm²)	0.44419		Classified Area (mm²)	0.79722		Classified Area (mm²)	1.01178		Classified Area (mm²)	0.85688		Classified Area (mm²)	0.70304		Classified Area (mm²)	0.44912
	tumour Area (mm²)	0.57634		tumour Area (mm²)	0.51402		tumour Area (mm²)	0.44419		tumour Area (mm²)	0.79704		tumour Area (mm²)	0.99215		tumour Area (mm²)	0.8543		tumour Area (mm²)	0.70304		tumour Area (mm²)	0.43723
	Necrosis Area (mm²)	0		Necrosis Area (mm²)	0		Necrosis Area (mm²)	0		Necrosis Area (mm²)	0		Necrosis Area (mm²)	0.00046		Necrosis Area (mm²)	0		Necrosis Area (mm²)	0		Necrosis Area (mm²)	0.00066
	Empty Area (mm²)	0.00255		Empty Area (mm²)	0		Empty Area (mm²)	0		Empty Area (mm²)	0		Empty Area (mm²)	0.01916		Empty Area (mm²)	0.00227		Empty Area (mm²)	0		Empty Area (mm²)	0.01113
	Normal Area (mm²)	0		Normal Area (mm²)	0		Normal Area (mm²)	0		Normal Area (mm²)	0.00018		Normal Area (mm²)	0		Normal Area (mm²)	0.0003		Normal Area (mm²)	0		Normal Area (mm²)	0.0001
	Tissue Area Analyzed (μm²)	570177		Tissue Area Analyzed (μm²)	513192		Tissue Area Analyzed (μm²)	439320		Tissue Area Analyzed (μm²)	794569		Tissue Area Analyzed (μm²)	967510		Tissue Area Analyzed (μm²)	828320		Tissue Area Analyzed (μm²)	702632		Tissue Area Analyzed (μm²)	418624
	nucleous Area (μm²)	324080		nucleous Area (μm²)	306349		nucleous Area (μm²)	189386		nucleous Area (μm²)	456709		nucleous Area (μm²)	476418		nucleous Area (μm²)	407001		nucleous Area (μm²)	419790		nucleous Area (μm²)	203435
	nucleous Weak Area (μm²)	108753		nucleous Weak Area (μm²)	104428		nucleous Weak Area (μm²)	64101.6		nucleous Weak Area (μm²)	155121		nucleous Weak Area (μm²)	145084		nucleous Weak Area (μm²)	125632		nucleous Weak Area (μm²)	145375		nucleous Weak Area (μm²)	63984
	nucleous Moderate Area (μm²)	64235.2		nucleous Moderate Area (μm²)	63821		nucleous Moderate Area (μm²)	38282.5		nucleous Moderate Area (μm²)	83885.6		nucleous Moderate Area (μm²)	95030.2		nucleous Moderate Area (μm²)	81531.9		nucleous Moderate Area (μm²)	86289.7		nucleous Moderate Area (μm²)	41518
	nucleous Strong Area (μm²)	151091		nucleous Strong Area (μm²)	138099		nucleous Strong Area (μm²)	87001.4		nucleous Strong Area (μm²)	217702		nucleous Strong Area (μm²)	236304		nucleous Strong Area (μm²)	199837		nucleous Strong Area (μm²)	188126		nucleous Strong Area (μm²)	97933
	cd31 Area (μm²)	18899		cd31 Area (μm²)	10468.8		cd31 Area (μm²)	25336.1		cd31 Area (μm²)	7971.81		cd31 Area (μm²)	6318.9		cd31 Area (μm²)	7564.21		cd31 Area (μm²)	6376.08		cd31 Area (μm²)	2883.04
	cd31 Weak Area (μm²)	6943.07		cd31 Weak Area (μm²)	3794.38		cd31 Weak Area (μm²)	7869.84		cd31 Weak Area (μm²)	3390.57		cd31 Weak Area (μm²)	2727.94		cd31 Weak Area (μm²)	2833.95		cd31 Weak Area (μm²)	2834.46		cd31 Weak Area (μm²)	1217.23
	cd31 Moderate Area (μm²)	6028.95		cd31 Moderate Area (μm²)	3295.7		cd31 Moderate Area (μm²)	7978.64		cd31 Moderate Area (μm²)	2656.85		cd31 Moderate Area (μm²)	2045.83		cd31 Moderate Area (μm²)	2305.17		cd31 Moderate Area (μm²)	2164.24		cd31 Moderate Area (μm²)	935.374
	cd31 Strong Area (μm²)	5926.99		cd31 Strong Area (μm²)	3378.68		cd31 Strong Area (μm²)	9487.58		cd31 Strong Area (μm²)	1924.39		cd31 Strong Area (μm²)	1545.13		cd31 Strong Area (μm²)	2425.09		cd31 Strong Area (μm²)	1377.38		cd31 Strong Area (μm²)	730.437
	% nucleous Positive Tissue	56.8385		% nucleous Positive Tissue	59.6948		% nucleous Positive Tissue	43.1088		% nucleous Positive Tissue	57.4789		% nucleous Positive Tissue	49.2417		% nucleous Positive Tissue	49.1357		% nucleous Positive Tissue	59.7454		% nucleous Positive Tissue	48.5961
	% nucleous Positive Tissue (weak)	19.0736		% nucleous Positive Tissue (weak)	20.3488		% nucleous Positive Tissue (weak)	14.5911		% nucleous Positive Tissue (weak)	19.5227		% nucleous Positive Tissue (weak)	14.9956		% nucleous Positive Tissue (weak)	15.1671		% nucleous Positive Tissue (weak)	20.6901		% nucleous Positive Tissue (weak)	15.2844
	% nucleous Positive Tissue (moderate)	11.2658		% nucleous Positive Tissue (moderate)	12.4361		% nucleous Positive Tissue (moderate)	8.71404		% nucleous Positive Tissue (moderate)	10.5574		% nucleous Positive Tissue (moderate)	9.82214		% nucleous Positive Tissue (moderate)	9.84305		% nucleous Positive Tissue (moderate)	12.2809		% nucleous Positive Tissue (moderate)	9.91774
	% nucleous Positive Tissue (strong)	26.499		% nucleous Positive Tissue (strong)	26.9099		% nucleous Positive Tissue (strong)	19.8037		% nucleous Positive Tissue (strong)	27.3988		% nucleous Positive Tissue (strong)	24.4239		% nucleous Positive Tissue (strong)	24.1256		% nucleous Positive Tissue (strong)	26.7744		% nucleous Positive Tissue (strong)	23.394
	% cd31 Positive Tissue	3.31459		% cd31 Positive Tissue	2.03993		% cd31 Positive Tissue	5.76711		% cd31 Positive Tissue	1.00329		% cd31 Positive Tissue	0.653109		% cd31 Positive Tissue	0.913199		% cd31 Positive Tissue	0.907457		% cd31 Positive Tissue	0.688694
	% cd31 Positive Tissue (weak)	1.2177		% cd31 Positive Tissue (weak)	0.739368		% cd31 Positive Tissue (weak)	1.79137		% cd31 Positive Tissue (weak)	0.426719		% cd31 Positive Tissue (weak)	0.281955		% cd31 Positive Tissue (weak)	0.342133		% cd31 Positive Tissue (weak)	0.403406		% cd31 Positive Tissue (weak)	0.290769
	% cd31 Positive Tissue (moderate)	1.05738		% cd31 Positive Tissue (moderate)	0.642196		% cd31 Positive Tissue (moderate)	1.81613		% cd31 Positive Tissue (moderate)	0.334376		% cd31 Positive Tissue (moderate)	0.211453		% cd31 Positive Tissue (moderate)	0.278294		% cd31 Positive Tissue (moderate)	0.308019		% cd31 Positive Tissue (moderate)	0.22344
	% cd31 Positive Tissue (strong)	1.0395		% cd31 Positive Tissue (strong)	0.658366		% cd31 Positive Tissue (strong)	2.15961		% cd31 Positive Tissue (strong)	0.242193		% cd31 Positive Tissue (strong)	0.159701		% cd31 Positive Tissue (strong)	0.292772		% cd31 Positive Tissue (strong)	0.196032		% cd31 Positive Tissue (strong)	0.174485
	nucleous Average Positive Optical Density	0.392583		nucleous Average Positive Optical Density	0.374779		nucleous Average Positive Optical Density	0.386958		nucleous Average Positive Optical Density	0.408223		nucleous Average Positive Optical Density	0.402308		nucleous Average Positive Optical Density	0.404221		nucleous Average Positive Optical Density	0.382918		nucleous Average Positive Optical Density	0.397829
	cd31 Average Positive Optical Density	0.603213		cd31 Average Positive Optical Density	0.601138		cd31 Average Positive Optical Density	0.623695		cd31 Average Positive Optical Density	0.565794		cd31 Average Positive Optical Density	0.563862		cd31 Average Positive Optical Density	0.604012		cd31 Average Positive Optical Density	0.552344		cd31 Average Positive Optical Density	0.568215
	% Negative Tissue	40.9249		% Negative Tissue	39.015		% Negative Tissue	52.6877		% Negative Tissue	41.7881		% Negative Tissue	50.3422		% Negative Tissue	50.2344		% Negative Tissue	39.7103		% Negative Tissue	50.9378
	tumour: Tissue Area Analyzed (μm²)	570177		tumour: Tissue Area Analyzed (μm²)	513192		tumour: Tissue Area Analyzed (μm²)	439320		tumour: Tissue Area Analyzed (μm²)	794569		tumour: Tissue Area Analyzed (μm²)	967510		tumour: Tissue Area Analyzed (μm²)	828320		tumour: Tissue Area Analyzed (μm²)	702632		tumour: Tissue Area Analyzed (μm²)	418624
	tumour: nucleous Area (μm²)	324080		tumour: nucleous Area (μm²)	306349		tumour: nucleous Area (μm²)	189386		tumour: nucleous Area (μm²)	456709		tumour: nucleous Area (μm²)	476418		tumour: nucleous Area (μm²)	407001		tumour: nucleous Area (μm²)	419790		tumour: nucleous Area (μm²)	203435
	tumour: nucleous Weak Area (μm²)	108753		tumour: nucleous Weak Area (μm²)	104428		tumour: nucleous Weak Area (μm²)	64101.6		tumour: nucleous Weak Area (μm²)	155121		tumour: nucleous Weak Area (μm²)	145084		tumour: nucleous Weak Area (μm²)	125632		tumour: nucleous Weak Area (μm²)	145375		tumour: nucleous Weak Area (μm²)	63984
	tumour: nucleous Moderate Area (μm²)	64235.2		tumour: nucleous Moderate Area (μm²)	63821		tumour: nucleous Moderate Area (μm²)	38282.5		tumour: nucleous Moderate Area (μm²)	83885.6		tumour: nucleous Moderate Area (μm²)	95030.2		tumour: nucleous Moderate Area (μm²)	81531.9		tumour: nucleous Moderate Area (μm²)	86289.7		tumour: nucleous Moderate Area (μm²)	41518
	tumour: nucleous Strong Area (μm²)	151091		tumour: nucleous Strong Area (μm²)	138099		tumour: nucleous Strong Area (μm²)	87001.4		tumour: nucleous Strong Area (μm²)	217702		tumour: nucleous Strong Area (μm²)	236304		tumour: nucleous Strong Area (μm²)	199837		tumour: nucleous Strong Area (μm²)	188126		tumour: nucleous Strong Area (μm²)	97933
	tumour: cd31 Area (μm²)	18899		tumour: cd31 Area (μm²)	10468.8		tumour: cd31 Area (μm²)	25336.1		tumour: cd31 Area (μm²)	7971.81		tumour: cd31 Area (μm²)	6318.9		tumour: cd31 Area (μm²)	7564.21		tumour: cd31 Area (μm²)	6376.08		tumour: cd31 Area (μm²)	2883.04
	tumour: cd31 Weak Area (μm²)	6943.07		tumour: cd31 Weak Area (μm²)	3794.38		tumour: cd31 Weak Area (μm²)	7869.84		tumour: cd31 Weak Area (μm²)	3390.57		tumour: cd31 Weak Area (μm²)	2727.94		tumour: cd31 Weak Area (μm²)	2833.95		tumour: cd31 Weak Area (μm²)	2834.46		tumour: cd31 Weak Area (μm²)	1217.23
	tumour: cd31 Moderate Area (μm²)	6028.95		tumour: cd31 Moderate Area (μm²)	3295.7		tumour: cd31 Moderate Area (μm²)	7978.64		tumour: cd31 Moderate Area (μm²)	2656.85		tumour: cd31 Moderate Area (μm²)	2045.83		tumour: cd31 Moderate Area (μm²)	2305.17		tumour: cd31 Moderate Area (μm²)	2164.24		tumour: cd31 Moderate Area (μm²)	935.374
	tumour: cd31 Strong Area (μm²)	5926.99		tumour: cd31 Strong Area (μm²)	3378.68		tumour: cd31 Strong Area (μm²)	9487.58		tumour: cd31 Strong Area (μm²)	1924.39		tumour: cd31 Strong Area (μm²)	1545.13		tumour: cd31 Strong Area (μm²)	2425.09		tumour: cd31 Strong Area (μm²)	1377.38		tumour: cd31 Strong Area (μm²)	730.437
	tumour: % nucleous Positive Tissue	56.8385		tumour: % nucleous Positive Tissue	59.6948		tumour: % nucleous Positive Tissue	43.1088		tumour: % nucleous Positive Tissue	57.4789		tumour: % nucleous Positive Tissue	49.2417		tumour: % nucleous Positive Tissue	49.1357		tumour: % nucleous Positive Tissue	59.7454		tumour: % nucleous Positive Tissue	48.5961
	tumour: % nucleous Positive Tissue (weak)	19.0736		tumour: % nucleous Positive Tissue (weak)	20.3488		tumour: % nucleous Positive Tissue (weak)	14.5911		tumour: % nucleous Positive Tissue (weak)	19.5227		tumour: % nucleous Positive Tissue (weak)	14.9956		tumour: % nucleous Positive Tissue (weak)	15.1671		tumour: % nucleous Positive Tissue (weak)	20.6901		tumour: % nucleous Positive Tissue (weak)	15.2844
	tumour: % nucleous Positive Tissue (moderate)	11.2658		tumour: % nucleous Positive Tissue (moderate)	12.4361		tumour: % nucleous Positive Tissue (moderate)	8.71404		tumour: % nucleous Positive Tissue (moderate)	10.5574		tumour: % nucleous Positive Tissue (moderate)	9.82214		tumour: % nucleous Positive Tissue (moderate)	9.84305		tumour: % nucleous Positive Tissue (moderate)	12.2809		tumour: % nucleous Positive Tissue (moderate)	9.91774
	tumour: % nucleous Positive Tissue (strong)	26.499		tumour: % nucleous Positive Tissue (strong)	26.9099		tumour: % nucleous Positive Tissue (strong)	19.8037		tumour: % nucleous Positive Tissue (strong)	27.3988		tumour: % nucleous Positive Tissue (strong)	24.4239		tumour: % nucleous Positive Tissue (strong)	24.1256		tumour: % nucleous Positive Tissue (strong)	26.7744		tumour: % nucleous Positive Tissue (strong)	23.394
	tumour: % cd31 Positive Tissue	3.31459		tumour: % cd31 Positive Tissue	2.03993		tumour: % cd31 Positive Tissue	5.76711		tumour: % cd31 Positive Tissue	1.00329		tumour: % cd31 Positive Tissue	0.653109		tumour: % cd31 Positive Tissue	0.913199		tumour: % cd31 Positive Tissue	0.907457		tumour: % cd31 Positive Tissue	0.688694		1.91092
	tumour: % cd31 Positive Tissue (weak)	1.2177		tumour: % cd31 Positive Tissue (weak)	0.739368		tumour: % cd31 Positive Tissue (weak)	1.79137		tumour: % cd31 Positive Tissue (weak)	0.426719		tumour: % cd31 Positive Tissue (weak)	0.281955		tumour: % cd31 Positive Tissue (weak)	0.342133		tumour: % cd31 Positive Tissue (weak)	0.403406		tumour: % cd31 Positive Tissue (weak)	0.290769
	tumour: % cd31 Positive Tissue (moderate)	1.05738		tumour: % cd31 Positive Tissue (moderate)	0.642196		tumour: % cd31 Positive Tissue (moderate)	1.81613		tumour: % cd31 Positive Tissue (moderate)	0.334376		tumour: % cd31 Positive Tissue (moderate)	0.211453		tumour: % cd31 Positive Tissue (moderate)	0.278294		tumour: % cd31 Positive Tissue (moderate)	0.308019		tumour: % cd31 Positive Tissue (moderate)	0.22344
	tumour: % cd31 Positive Tissue (strong)	1.0395		tumour: % cd31 Positive Tissue (strong)	0.658366		tumour: % cd31 Positive Tissue (strong)	2.15961		tumour: % cd31 Positive Tissue (strong)	0.242193		tumour: % cd31 Positive Tissue (strong)	0.159701		tumour: % cd31 Positive Tissue (strong)	0.292772		tumour: % cd31 Positive Tissue (strong)	0.196032		tumour: % cd31 Positive Tissue (strong)	0.174485
	tumour: nucleous Average Positive Optical Density	0.392583		tumour: nucleous Average Positive Optical Density	0.374779		tumour: nucleous Average Positive Optical Density	0.386958		tumour: nucleous Average Positive Optical Density	0.408223		tumour: nucleous Average Positive Optical Density	0.402308		tumour: nucleous Average Positive Optical Density	0.404221		tumour: nucleous Average Positive Optical Density	0.382918		tumour: nucleous Average Positive Optical Density	0.397829
	tumour: cd31 Average Positive Optical Density	0.603213		tumour: cd31 Average Positive Optical Density	0.601138		tumour: cd31 Average Positive Optical Density	0.623695		tumour: cd31 Average Positive Optical Density	0.565794		tumour: cd31 Average Positive Optical Density	0.563862		tumour: cd31 Average Positive Optical Density	0.604012		tumour: cd31 Average Positive Optical Density	0.552344		tumour: cd31 Average Positive Optical Density	0.568215
	tumour: % Negative Tissue	40.9249		tumour: % Negative Tissue	39.015		tumour: % Negative Tissue	52.6877		tumour: % Negative Tissue	41.7881		tumour: % Negative Tissue	50.3422		tumour: % Negative Tissue	50.2344		tumour: % Negative Tissue	39.7103		tumour: % Negative Tissue	50.9378
	BSNA11.1g	HOM
	Name	Value		Name	Value		Name	Value		Name	Value		Name	Value		Name	Value		Name	Value		Name	Value
	Classified Area (mm²)	1.06642		Classified Area (mm²)	0.83918		Classified Area (mm²)	0.49463		Classified Area (mm²)	0.43576		Classified Area (mm²)	0.51443		Classified Area (mm²)	0.74829		Classified Area (mm²)	0.65176		Classified Area (mm²)	0.54774
	tumour Area (mm²)	1.06354		tumour Area (mm²)	0.83916		tumour Area (mm²)	0.49463		tumour Area (mm²)	0.43576		tumour Area (mm²)	0.51443		tumour Area (mm²)	0.74829		tumour Area (mm²)	0.65176		tumour Area (mm²)	0.54774
	Necrosis Area (mm²)	3e-05		Necrosis Area (mm²)	0		Necrosis Area (mm²)	0		Necrosis Area (mm²)	0		Necrosis Area (mm²)	0		Necrosis Area (mm²)	0		Necrosis Area (mm²)	0		Necrosis Area (mm²)	0
	Empty Area (mm²)	0.00285		Empty Area (mm²)	0		Empty Area (mm²)	0		Empty Area (mm²)	0		Empty Area (mm²)	0		Empty Area (mm²)	0		Empty Area (mm²)	0		Empty Area (mm²)	0
	Normal Area (mm²)	0		Normal Area (mm²)	2e-05		Normal Area (mm²)	0		Normal Area (mm²)	0		Normal Area (mm²)	0		Normal Area (mm²)	0		Normal Area (mm²)	0		Normal Area (mm²)	0
	Tissue Area Analyzed (μm²)	1.05527e+06		Tissue Area Analyzed (μm²)	838530		Tissue Area Analyzed (μm²)	493776		Tissue Area Analyzed (μm²)	434803		Tissue Area Analyzed (μm²)	513002		Tissue Area Analyzed (μm²)	746839		Tissue Area Analyzed (μm²)	649763		Tissue Area Analyzed (μm²)	545938
	nucleous Area (μm²)	451839		nucleous Area (μm²)	400138		nucleous Area (μm²)	205928		nucleous Area (μm²)	206131		nucleous Area (μm²)	265332		nucleous Area (μm²)	333418		nucleous Area (μm²)	284707		nucleous Area (μm²)	257710
	nucleous Weak Area (μm²)	153393		nucleous Weak Area (μm²)	142716		nucleous Weak Area (μm²)	77930.3		nucleous Weak Area (μm²)	72532.1		nucleous Weak Area (μm²)	101477		nucleous Weak Area (μm²)	109566		nucleous Weak Area (μm²)	99712.9		nucleous Weak Area (μm²)	102508
	nucleous Moderate Area (μm²)	93476.2		nucleous Moderate Area (μm²)	81038.8		nucleous Moderate Area (μm²)	40033.6		nucleous Moderate Area (μm²)	38311.1		nucleous Moderate Area (μm²)	50642.5		nucleous Moderate Area (μm²)	69800.1		nucleous Moderate Area (μm²)	58515.4		nucleous Moderate Area (μm²)	52690.9
	nucleous Strong Area (μm²)	204970		nucleous Strong Area (μm²)	176383		nucleous Strong Area (μm²)	87964.1		nucleous Strong Area (μm²)	95287.5		nucleous Strong Area (μm²)	113212		nucleous Strong Area (μm²)	154052		nucleous Strong Area (μm²)	126479		nucleous Strong Area (μm²)	102512
	cd31 Area (μm²)	27363.9		cd31 Area (μm²)	13029.7		cd31 Area (μm²)	10720.2		cd31 Area (μm²)	7722.34		cd31 Area (μm²)	7957.39		cd31 Area (μm²)	18093.4		cd31 Area (μm²)	14488.8		cd31 Area (μm²)	4090.65
	cd31 Weak Area (μm²)	8927.68		cd31 Weak Area (μm²)	5196.05		cd31 Weak Area (μm²)	3295.44		cd31 Weak Area (μm²)	3105.43		cd31 Weak Area (μm²)	3220.3		cd31 Weak Area (μm²)	5027.29		cd31 Weak Area (μm²)	4445.12		cd31 Weak Area (μm²)	1705.28
	cd31 Moderate Area (μm²)	8469.73		cd31 Moderate Area (μm²)	4250.8		cd31 Moderate Area (μm²)	3256.48		cd31 Moderate Area (μm²)	2535.4		cd31 Moderate Area (μm²)	2681.9		cd31 Moderate Area (μm²)	5017.17		cd31 Moderate Area (μm²)	4324.18		cd31 Moderate Area (μm²)	1350.06
	cd31 Strong Area (μm²)	9966.53		cd31 Strong Area (μm²)	3582.86		cd31 Strong Area (μm²)	4168.32		cd31 Strong Area (μm²)	2081.51		cd31 Strong Area (μm²)	2055.19		cd31 Strong Area (μm²)	8048.98		cd31 Strong Area (μm²)	5719.52		cd31 Strong Area (μm²)	1035.31
	% nucleous Positive Tissue	42.8176		% nucleous Positive Tissue	47.719		% nucleous Positive Tissue	41.7048		% nucleous Positive Tissue	47.4079		% nucleous Positive Tissue	51.7214		% nucleous Positive Tissue	44.6439		% nucleous Positive Tissue	43.8171		% nucleous Positive Tissue	47.2051
	% nucleous Positive Tissue (weak)	14.536		% nucleous Positive Tissue (weak)	17.0198		% nucleous Positive Tissue (weak)	15.7825		% nucleous Positive Tissue (weak)	16.6816		% nucleous Positive Tissue (weak)	19.781		% nucleous Positive Tissue (weak)	14.6706		% nucleous Positive Tissue (weak)	15.346		% nucleous Positive Tissue (weak)	18.7764
	% nucleous Positive Tissue (moderate)	8.85807		% nucleous Positive Tissue (moderate)	9.66438		% nucleous Positive Tissue (moderate)	8.10765		% nucleous Positive Tissue (moderate)	8.81115		% nucleous Positive Tissue (moderate)	9.8718		% nucleous Positive Tissue (moderate)	9.34607		% nucleous Positive Tissue (moderate)	9.00566		% nucleous Positive Tissue (moderate)	9.65145
	% nucleous Positive Tissue (strong)	19.4235		% nucleous Positive Tissue (strong)	21.0348		% nucleous Positive Tissue (strong)	17.8146		% nucleous Positive Tissue (strong)	21.9151		% nucleous Positive Tissue (strong)	22.0685		% nucleous Positive Tissue (strong)	20.6273		% nucleous Positive Tissue (strong)	19.4654		% nucleous Positive Tissue (strong)	18.7772
	% cd31 Positive Tissue	2.59308		% cd31 Positive Tissue	1.55387		% cd31 Positive Tissue	2.17108		% cd31 Positive Tissue	1.77606		% cd31 Positive Tissue	1.55114		% cd31 Positive Tissue	2.42267		% cd31 Positive Tissue	2.22986		% cd31 Positive Tissue	0.749289
	% cd31 Positive Tissue (weak)	0.846012		% cd31 Positive Tissue (weak)	0.619661		% cd31 Positive Tissue (weak)	0.667396		% cd31 Positive Tissue (weak)	0.714216		% cd31 Positive Tissue (weak)	0.627736		% cd31 Positive Tissue (weak)	0.673142		% cd31 Positive Tissue (weak)	0.684114		% cd31 Positive Tissue (weak)	0.312358
	% cd31 Positive Tissue (moderate)	0.802616		% cd31 Positive Tissue (moderate)	0.506935		% cd31 Positive Tissue (moderate)	0.659505		% cd31 Positive Tissue (moderate)	0.583116		% cd31 Positive Tissue (moderate)	0.522784		% cd31 Positive Tissue (moderate)	0.671787		% cd31 Positive Tissue (moderate)	0.665501		% cd31 Positive Tissue (moderate)	0.247291
	% cd31 Positive Tissue (strong)	0.944457		% cd31 Positive Tissue (strong)	0.427279		% cd31 Positive Tissue (strong)	0.844173		% cd31 Positive Tissue (strong)	0.478724		% cd31 Positive Tissue (strong)	0.40062		% cd31 Positive Tissue (strong)	1.07774		% cd31 Positive Tissue (strong)	0.880248		% cd31 Positive Tissue (strong)	0.189639
	nucleous Average Positive Optical Density	0.370809		nucleous Average Positive Optical Density	0.369103		nucleous Average Positive Optical Density	0.361612		nucleous Average Positive Optical Density	0.38183		nucleous Average Positive Optical Density	0.363879		nucleous Average Positive Optical Density	0.373524		nucleous Average Positive Optical Density	0.365059		nucleous Average Positive Optical Density	0.353668
	cd31 Average Positive Optical Density	0.623509		cd31 Average Positive Optical Density	0.576938		cd31 Average Positive Optical Density	0.634136		cd31 Average Positive Optical Density	0.576909		cd31 Average Positive Optical Density	0.570568		cd31 Average Positive Optical Density	0.6709		cd31 Average Positive Optical Density	0.634598		cd31 Average Positive Optical Density	0.571392
	% Negative Tissue	55.3203		% Negative Tissue	51.2656		% Negative Tissue	56.722		% Negative Tissue	51.4237		% Negative Tissue	47.31		% Negative Tissue	53.7189		% Negative Tissue	54.55		% Negative Tissue	52.2491
	tumour: Tissue Area Analyzed (μm²)	1.05527e+06		tumour: Tissue Area Analyzed (μm²)	838530		tumour: Tissue Area Analyzed (μm²)	493776		tumour: Tissue Area Analyzed (μm²)	434803		tumour: Tissue Area Analyzed (μm²)	513002		tumour: Tissue Area Analyzed (μm²)	746839		tumour: Tissue Area Analyzed (μm²)	649763		tumour: Tissue Area Analyzed (μm²)	545938
	tumour: nucleous Area (μm²)	451839		tumour: nucleous Area (μm²)	400138		tumour: nucleous Area (μm²)	205928		tumour: nucleous Area (μm²)	206131		tumour: nucleous Area (μm²)	265332		tumour: nucleous Area (μm²)	333418		tumour: nucleous Area (μm²)	284707		tumour: nucleous Area (μm²)	257710
	tumour: nucleous Weak Area (μm²)	153393		tumour: nucleous Weak Area (μm²)	142716		tumour: nucleous Weak Area (μm²)	77930.3		tumour: nucleous Weak Area (μm²)	72532.1		tumour: nucleous Weak Area (μm²)	101477		tumour: nucleous Weak Area (μm²)	109566		tumour: nucleous Weak Area (μm²)	99712.9		tumour: nucleous Weak Area (μm²)	102508
	tumour: nucleous Moderate Area (μm²)	93476.2		tumour: nucleous Moderate Area (μm²)	81038.8		tumour: nucleous Moderate Area (μm²)	40033.6		tumour: nucleous Moderate Area (μm²)	38311.1		tumour: nucleous Moderate Area (μm²)	50642.5		tumour: nucleous Moderate Area (μm²)	69800.1		tumour: nucleous Moderate Area (μm²)	58515.4		tumour: nucleous Moderate Area (μm²)	52690.9
	tumour: nucleous Strong Area (μm²)	204970		tumour: nucleous Strong Area (μm²)	176383		tumour: nucleous Strong Area (μm²)	87964.1		tumour: nucleous Strong Area (μm²)	95287.5		tumour: nucleous Strong Area (μm²)	113212		tumour: nucleous Strong Area (μm²)	154052		tumour: nucleous Strong Area (μm²)	126479		tumour: nucleous Strong Area (μm²)	102512
	tumour: cd31 Area (μm²)	27363.9		tumour: cd31 Area (μm²)	13029.7		tumour: cd31 Area (μm²)	10720.2		tumour: cd31 Area (μm²)	7722.34		tumour: cd31 Area (μm²)	7957.39		tumour: cd31 Area (μm²)	18093.4		tumour: cd31 Area (μm²)	14488.8		tumour: cd31 Area (μm²)	4090.65
	tumour: cd31 Weak Area (μm²)	8927.68		tumour: cd31 Weak Area (μm²)	5196.05		tumour: cd31 Weak Area (μm²)	3295.44		tumour: cd31 Weak Area (μm²)	3105.43		tumour: cd31 Weak Area (μm²)	3220.3		tumour: cd31 Weak Area (μm²)	5027.29		tumour: cd31 Weak Area (μm²)	4445.12		tumour: cd31 Weak Area (μm²)	1705.28
	tumour: cd31 Moderate Area (μm²)	8469.73		tumour: cd31 Moderate Area (μm²)	4250.8		tumour: cd31 Moderate Area (μm²)	3256.48		tumour: cd31 Moderate Area (μm²)	2535.4		tumour: cd31 Moderate Area (μm²)	2681.9		tumour: cd31 Moderate Area (μm²)	5017.17		tumour: cd31 Moderate Area (μm²)	4324.18		tumour: cd31 Moderate Area (μm²)	1350.06
	tumour: cd31 Strong Area (μm²)	9966.53		tumour: cd31 Strong Area (μm²)	3582.86		tumour: cd31 Strong Area (μm²)	4168.32		tumour: cd31 Strong Area (μm²)	2081.51		tumour: cd31 Strong Area (μm²)	2055.19		tumour: cd31 Strong Area (μm²)	8048.98		tumour: cd31 Strong Area (μm²)	5719.52		tumour: cd31 Strong Area (μm²)	1035.31
	tumour: % nucleous Positive Tissue	42.8176		tumour: % nucleous Positive Tissue	47.719		tumour: % nucleous Positive Tissue	41.7048		tumour: % nucleous Positive Tissue	47.4079		tumour: % nucleous Positive Tissue	51.7214		tumour: % nucleous Positive Tissue	44.6439		tumour: % nucleous Positive Tissue	43.8171		tumour: % nucleous Positive Tissue	47.2051
	tumour: % nucleous Positive Tissue (weak)	14.536		tumour: % nucleous Positive Tissue (weak)	17.0198		tumour: % nucleous Positive Tissue (weak)	15.7825		tumour: % nucleous Positive Tissue (weak)	16.6816		tumour: % nucleous Positive Tissue (weak)	19.781		tumour: % nucleous Positive Tissue (weak)	14.6706		tumour: % nucleous Positive Tissue (weak)	15.346		tumour: % nucleous Positive Tissue (weak)	18.7764
	tumour: % nucleous Positive Tissue (moderate)	8.85807		tumour: % nucleous Positive Tissue (moderate)	9.66438		tumour: % nucleous Positive Tissue (moderate)	8.10765		tumour: % nucleous Positive Tissue (moderate)	8.81115		tumour: % nucleous Positive Tissue (moderate)	9.8718		tumour: % nucleous Positive Tissue (moderate)	9.34607		tumour: % nucleous Positive Tissue (moderate)	9.00566		tumour: % nucleous Positive Tissue (moderate)	9.65145
	tumour: % nucleous Positive Tissue (strong)	19.4235		tumour: % nucleous Positive Tissue (strong)	21.0348		tumour: % nucleous Positive Tissue (strong)	17.8146		tumour: % nucleous Positive Tissue (strong)	21.9151		tumour: % nucleous Positive Tissue (strong)	22.0685		tumour: % nucleous Positive Tissue (strong)	20.6273		tumour: % nucleous Positive Tissue (strong)	19.4654		tumour: % nucleous Positive Tissue (strong)	18.7772
	tumour: % cd31 Positive Tissue	2.59308		tumour: % cd31 Positive Tissue	1.55387		tumour: % cd31 Positive Tissue	2.17108		tumour: % cd31 Positive Tissue	1.77606		tumour: % cd31 Positive Tissue	1.55114		tumour: % cd31 Positive Tissue	2.42267		tumour: % cd31 Positive Tissue	2.22986		tumour: % cd31 Positive Tissue	0.749289		1.88088
	tumour: % cd31 Positive Tissue (weak)	0.846012		tumour: % cd31 Positive Tissue (weak)	0.619661		tumour: % cd31 Positive Tissue (weak)	0.667396		tumour: % cd31 Positive Tissue (weak)	0.714216		tumour: % cd31 Positive Tissue (weak)	0.627736		tumour: % cd31 Positive Tissue (weak)	0.673142		tumour: % cd31 Positive Tissue (weak)	0.684114		tumour: % cd31 Positive Tissue (weak)	0.312358
	tumour: % cd31 Positive Tissue (moderate)	0.802616		tumour: % cd31 Positive Tissue (moderate)	0.506935		tumour: % cd31 Positive Tissue (moderate)	0.659505		tumour: % cd31 Positive Tissue (moderate)	0.583116		tumour: % cd31 Positive Tissue (moderate)	0.522784		tumour: % cd31 Positive Tissue (moderate)	0.671787		tumour: % cd31 Positive Tissue (moderate)	0.665501		tumour: % cd31 Positive Tissue (moderate)	0.247291
	tumour: % cd31 Positive Tissue (strong)	0.944457		tumour: % cd31 Positive Tissue (strong)	0.427279		tumour: % cd31 Positive Tissue (strong)	0.844173		tumour: % cd31 Positive Tissue (strong)	0.478724		tumour: % cd31 Positive Tissue (strong)	0.40062		tumour: % cd31 Positive Tissue (strong)	1.07774		tumour: % cd31 Positive Tissue (strong)	0.880248		tumour: % cd31 Positive Tissue (strong)	0.189639
	tumour: nucleous Average Positive Optical Density	0.370809		tumour: nucleous Average Positive Optical Density	0.369103		tumour: nucleous Average Positive Optical Density	0.361612		tumour: nucleous Average Positive Optical Density	0.38183		tumour: nucleous Average Positive Optical Density	0.363879		tumour: nucleous Average Positive Optical Density	0.373524		tumour: nucleous Average Positive Optical Density	0.365059		tumour: nucleous Average Positive Optical Density	0.353668
	tumour: cd31 Average Positive Optical Density	0.623509		tumour: cd31 Average Positive Optical Density	0.576938		tumour: cd31 Average Positive Optical Density	0.634136		tumour: cd31 Average Positive Optical Density	0.576909		tumour: cd31 Average Positive Optical Density	0.570568		tumour: cd31 Average Positive Optical Density	0.6709		tumour: cd31 Average Positive Optical Density	0.634598		tumour: cd31 Average Positive Optical Density	0.571392
	tumour: % Negative Tissue	55.3203		tumour: % Negative Tissue	51.2656		tumour: % Negative Tissue	56.722		tumour: % Negative Tissue	51.4237		tumour: % Negative Tissue	47.31		tumour: % Negative Tissue	53.7189		tumour: % Negative Tissue	54.55		tumour: % Negative Tissue	52.2491
	BSNA9.4a	HOM
	Name	Value		Name	Value		Name	Value		Name	Value		Name	Value		Name	Value		Name	Value		Name	Value
	Classified Area (mm²)	1.00516		Classified Area (mm²)	1.05758		Classified Area (mm²)	0.46106		Classified Area (mm²)	0.51184		Classified Area (mm²)	0.60001		Classified Area (mm²)	0.71452		Classified Area (mm²)	0.88966		Classified Area (mm²)	0.84948
	tumour Area (mm²)	1.00516		tumour Area (mm²)	1.05758		tumour Area (mm²)	0.46106		tumour Area (mm²)	0.51184		tumour Area (mm²)	0.60001		tumour Area (mm²)	0.71452		tumour Area (mm²)	0.88929		tumour Area (mm²)	0.84944
	Necrosis Area (mm²)	0		Necrosis Area (mm²)	0		Necrosis Area (mm²)	0		Necrosis Area (mm²)	0		Necrosis Area (mm²)	0		Necrosis Area (mm²)	0		Necrosis Area (mm²)	0		Necrosis Area (mm²)	0
	Empty Area (mm²)	0		Empty Area (mm²)	0		Empty Area (mm²)	0		Empty Area (mm²)	0		Empty Area (mm²)	0		Empty Area (mm²)	0		Empty Area (mm²)	0		Empty Area (mm²)	3e-05
	Normal Area (mm²)	0		Normal Area (mm²)	0		Normal Area (mm²)	0		Normal Area (mm²)	0		Normal Area (mm²)	0		Normal Area (mm²)	0		Normal Area (mm²)	0.00037		Normal Area (mm²)	0
	Tissue Area Analyzed (μm²)	1.00228e+06		Tissue Area Analyzed (μm²)	1.05571e+06		Tissue Area Analyzed (μm²)	459878		Tissue Area Analyzed (μm²)	510134		Tissue Area Analyzed (μm²)	598866		Tissue Area Analyzed (μm²)	712622		Tissue Area Analyzed (μm²)	886089		Tissue Area Analyzed (μm²)	847500
	nucleous Area (μm²)	401575		nucleous Area (μm²)	561536		nucleous Area (μm²)	213075		nucleous Area (μm²)	254232		nucleous Area (μm²)	304434		nucleous Area (μm²)	332792		nucleous Area (μm²)	556662		nucleous Area (μm²)	425742
	nucleous Weak Area (μm²)	137408		nucleous Weak Area (μm²)	226034		nucleous Weak Area (μm²)	79399.3		nucleous Weak Area (μm²)	110374		nucleous Weak Area (μm²)	126833		nucleous Weak Area (μm²)	125683		nucleous Weak Area (μm²)	220169		nucleous Weak Area (μm²)	153176
	nucleous Moderate Area (μm²)	83033.8		nucleous Moderate Area (μm²)	105608		nucleous Moderate Area (μm²)	41570.4		nucleous Moderate Area (μm²)	45961.6		nucleous Moderate Area (μm²)	54543.4		nucleous Moderate Area (μm²)	59585.6		nucleous Moderate Area (μm²)	96272.5		nucleous Moderate Area (μm²)	84066.8
	nucleous Strong Area (μm²)	181133		nucleous Strong Area (μm²)	229894		nucleous Strong Area (μm²)	92105.4		nucleous Strong Area (μm²)	97896.8		nucleous Strong Area (μm²)	123057		nucleous Strong Area (μm²)	147523		nucleous Strong Area (μm²)	240220		nucleous Strong Area (μm²)	188499
	cd31 Area (μm²)	27612.6		cd31 Area (μm²)	19777.7		cd31 Area (μm²)	14550.5		cd31 Area (μm²)	11893.4		cd31 Area (μm²)	15081.9		cd31 Area (μm²)	7860.74		cd31 Area (μm²)	26011.3		cd31 Area (μm²)	19161.1
	cd31 Weak Area (μm²)	9721.87		cd31 Weak Area (μm²)	8143.6		cd31 Weak Area (μm²)	5102.69		cd31 Weak Area (μm²)	4261.18		cd31 Weak Area (μm²)	5090.54		cd31 Weak Area (μm²)	2424.84		cd31 Weak Area (μm²)	9559.95		cd31 Weak Area (μm²)	9125.78
	cd31 Moderate Area (μm²)	8341.2		cd31 Moderate Area (μm²)	6576.46		cd31 Moderate Area (μm²)	4692.3		cd31 Moderate Area (μm²)	3746.56		cd31 Moderate Area (μm²)	4625		cd31 Moderate Area (μm²)	2282.39		cd31 Moderate Area (μm²)	8168.4		cd31 Moderate Area (μm²)	6312.07
	cd31 Strong Area (μm²)	9549.57		cd31 Strong Area (μm²)	5057.65		cd31 Strong Area (μm²)	4755.56		cd31 Strong Area (μm²)	3885.71		cd31 Strong Area (μm²)	5366.32		cd31 Strong Area (μm²)	3153.5		cd31 Strong Area (μm²)	8283.01		cd31 Strong Area (μm²)	3723.28
	% nucleous Positive Tissue	40.0663		% nucleous Positive Tissue	53.1905		% nucleous Positive Tissue	46.333		% nucleous Positive Tissue	49.8364		% nucleous Positive Tissue	50.835		% nucleous Positive Tissue	46.6997		% nucleous Positive Tissue	62.8224		% nucleous Positive Tissue	50.235
	% nucleous Positive Tissue (weak)	13.7096		% nucleous Positive Tissue (weak)	21.4106		% nucleous Positive Tissue (weak)	17.2653		% nucleous Positive Tissue (weak)	21.6363		% nucleous Positive Tissue (weak)	21.1789		% nucleous Positive Tissue (weak)	17.6368		% nucleous Positive Tissue (weak)	24.8473		% nucleous Positive Tissue (weak)	18.0739
	% nucleous Positive Tissue (moderate)	8.28452		% nucleous Positive Tissue (moderate)	10.0035		% nucleous Positive Tissue (moderate)	9.03944		% nucleous Positive Tissue (moderate)	9.00971		% nucleous Positive Tissue (moderate)	9.10778		% nucleous Positive Tissue (moderate)	8.36147		% nucleous Positive Tissue (moderate)	10.8649		% nucleous Positive Tissue (moderate)	9.91939
	% nucleous Positive Tissue (strong)	18.0722		% nucleous Positive Tissue (strong)	21.7763		% nucleous Positive Tissue (strong)	20.0282		% nucleous Positive Tissue (strong)	19.1904		% nucleous Positive Tissue (strong)	20.5483		% nucleous Positive Tissue (strong)	20.7014		% nucleous Positive Tissue (strong)	27.1101		% nucleous Positive Tissue (strong)	22.2418
	% cd31 Positive Tissue	2.75499		% cd31 Positive Tissue	1.87341		% cd31 Positive Tissue	3.164		% cd31 Positive Tissue	2.33143		% cd31 Positive Tissue	2.5184		% cd31 Positive Tissue	1.10307		% cd31 Positive Tissue	2.93552		% cd31 Positive Tissue	2.2609
	% cd31 Positive Tissue (weak)	0.969979		% cd31 Positive Tissue (weak)	0.771388		% cd31 Positive Tissue (weak)	1.10957		% cd31 Positive Tissue (weak)	0.835305		% cd31 Positive Tissue (weak)	0.850029		% cd31 Positive Tissue (weak)	0.34027		% cd31 Positive Tissue (weak)	1.07889		% cd31 Positive Tissue (weak)	1.07679
	% cd31 Positive Tissue (moderate)	0.832226		% cd31 Positive Tissue (moderate)	0.622944		% cd31 Positive Tissue (moderate)	1.02034		% cd31 Positive Tissue (moderate)	0.734426		% cd31 Positive Tissue (moderate)	0.772293		% cd31 Positive Tissue (moderate)	0.320281		% cd31 Positive Tissue (moderate)	0.921849		% cd31 Positive Tissue (moderate)	0.744787
	% cd31 Positive Tissue (strong)	0.952789		% cd31 Positive Tissue (strong)	0.479077		% cd31 Positive Tissue (strong)	1.03409		% cd31 Positive Tissue (strong)	0.761704		% cd31 Positive Tissue (strong)	0.89608		% cd31 Positive Tissue (strong)	0.442521		% cd31 Positive Tissue (strong)	0.934783		% cd31 Positive Tissue (strong)	0.439325
	nucleous Average Positive Optical Density	0.37408		nucleous Average Positive Optical Density	0.359411		nucleous Average Positive Optical Density	0.36902		nucleous Average Positive Optical Density	0.351882		nucleous Average Positive Optical Density	0.361392		nucleous Average Positive Optical Density	0.378154		nucleous Average Positive Optical Density	0.378163		nucleous Average Positive Optical Density	0.375166
	cd31 Average Positive Optical Density	0.614431		cd31 Average Positive Optical Density	0.56997		cd31 Average Positive Optical Density	0.603713		cd31 Average Positive Optical Density	0.607901		cd31 Average Positive Optical Density	0.622877		cd31 Average Positive Optical Density	0.647196		cd31 Average Positive Optical Density	0.598341		cd31 Average Positive Optical Density	0.5431
	% Negative Tissue	57.802		% Negative Tissue	45.3761		% Negative Tissue	51.268		% Negative Tissue	48.3152		% Negative Tissue	47.3077		% Negative Tissue	52.4789		% Negative Tissue	35.2924		% Negative Tissue	48.0479
	tumour: Tissue Area Analyzed (μm²)	1.00228e+06		tumour: Tissue Area Analyzed (μm²)	1.05571e+06		tumour: Tissue Area Analyzed (μm²)	459878		tumour: Tissue Area Analyzed (μm²)	510134		tumour: Tissue Area Analyzed (μm²)	598866		tumour: Tissue Area Analyzed (μm²)	712622		tumour: Tissue Area Analyzed (μm²)	886089		tumour: Tissue Area Analyzed (μm²)	847500
	tumour: nucleous Area (μm²)	401575		tumour: nucleous Area (μm²)	561536		tumour: nucleous Area (μm²)	213075		tumour: nucleous Area (μm²)	254232		tumour: nucleous Area (μm²)	304434		tumour: nucleous Area (μm²)	332792		tumour: nucleous Area (μm²)	556662		tumour: nucleous Area (μm²)	425742
	tumour: nucleous Weak Area (μm²)	137408		tumour: nucleous Weak Area (μm²)	226034		tumour: nucleous Weak Area (μm²)	79399.3		tumour: nucleous Weak Area (μm²)	110374		tumour: nucleous Weak Area (μm²)	126833		tumour: nucleous Weak Area (μm²)	125683		tumour: nucleous Weak Area (μm²)	220169		tumour: nucleous Weak Area (μm²)	153176
	tumour: nucleous Moderate Area (μm²)	83033.8		tumour: nucleous Moderate Area (μm²)	105608		tumour: nucleous Moderate Area (μm²)	41570.4		tumour: nucleous Moderate Area (μm²)	45961.6		tumour: nucleous Moderate Area (μm²)	54543.4		tumour: nucleous Moderate Area (μm²)	59585.6		tumour: nucleous Moderate Area (μm²)	96272.5		tumour: nucleous Moderate Area (μm²)	84066.8
	tumour: nucleous Strong Area (μm²)	181133		tumour: nucleous Strong Area (μm²)	229894		tumour: nucleous Strong Area (μm²)	92105.4		tumour: nucleous Strong Area (μm²)	97896.8		tumour: nucleous Strong Area (μm²)	123057		tumour: nucleous Strong Area (μm²)	147523		tumour: nucleous Strong Area (μm²)	240220		tumour: nucleous Strong Area (μm²)	188499
	tumour: cd31 Area (μm²)	27612.6		tumour: cd31 Area (μm²)	19777.7		tumour: cd31 Area (μm²)	14550.5		tumour: cd31 Area (μm²)	11893.4		tumour: cd31 Area (μm²)	15081.9		tumour: cd31 Area (μm²)	7860.74		tumour: cd31 Area (μm²)	26011.3		tumour: cd31 Area (μm²)	19161.1
	tumour: cd31 Weak Area (μm²)	9721.87		tumour: cd31 Weak Area (μm²)	8143.6		tumour: cd31 Weak Area (μm²)	5102.69		tumour: cd31 Weak Area (μm²)	4261.18		tumour: cd31 Weak Area (μm²)	5090.54		tumour: cd31 Weak Area (μm²)	2424.84		tumour: cd31 Weak Area (μm²)	9559.95		tumour: cd31 Weak Area (μm²)	9125.78
	tumour: cd31 Moderate Area (μm²)	8341.2		tumour: cd31 Moderate Area (μm²)	6576.46		tumour: cd31 Moderate Area (μm²)	4692.3		tumour: cd31 Moderate Area (μm²)	3746.56		tumour: cd31 Moderate Area (μm²)	4625		tumour: cd31 Moderate Area (μm²)	2282.39		tumour: cd31 Moderate Area (μm²)	8168.4		tumour: cd31 Moderate Area (μm²)	6312.07
	tumour: cd31 Strong Area (μm²)	9549.57		tumour: cd31 Strong Area (μm²)	5057.65		tumour: cd31 Strong Area (μm²)	4755.56		tumour: cd31 Strong Area (μm²)	3885.71		tumour: cd31 Strong Area (μm²)	5366.32		tumour: cd31 Strong Area (μm²)	3153.5		tumour: cd31 Strong Area (μm²)	8283.01		tumour: cd31 Strong Area (μm²)	3723.28
	tumour: % nucleous Positive Tissue	40.0663		tumour: % nucleous Positive Tissue	53.1905		tumour: % nucleous Positive Tissue	46.333		tumour: % nucleous Positive Tissue	49.8364		tumour: % nucleous Positive Tissue	50.835		tumour: % nucleous Positive Tissue	46.6997		tumour: % nucleous Positive Tissue	62.8224		tumour: % nucleous Positive Tissue	50.235
	tumour: % nucleous Positive Tissue (weak)	13.7096		tumour: % nucleous Positive Tissue (weak)	21.4106		tumour: % nucleous Positive Tissue (weak)	17.2653		tumour: % nucleous Positive Tissue (weak)	21.6363		tumour: % nucleous Positive Tissue (weak)	21.1789		tumour: % nucleous Positive Tissue (weak)	17.6368		tumour: % nucleous Positive Tissue (weak)	24.8473		tumour: % nucleous Positive Tissue (weak)	18.0739
	tumour: % nucleous Positive Tissue (moderate)	8.28452		tumour: % nucleous Positive Tissue (moderate)	10.0035		tumour: % nucleous Positive Tissue (moderate)	9.03944		tumour: % nucleous Positive Tissue (moderate)	9.00971		tumour: % nucleous Positive Tissue (moderate)	9.10778		tumour: % nucleous Positive Tissue (moderate)	8.36147		tumour: % nucleous Positive Tissue (moderate)	10.8649		tumour: % nucleous Positive Tissue (moderate)	9.91939
	tumour: % nucleous Positive Tissue (strong)	18.0722		tumour: % nucleous Positive Tissue (strong)	21.7763		tumour: % nucleous Positive Tissue (strong)	20.0282		tumour: % nucleous Positive Tissue (strong)	19.1904		tumour: % nucleous Positive Tissue (strong)	20.5483		tumour: % nucleous Positive Tissue (strong)	20.7014		tumour: % nucleous Positive Tissue (strong)	27.1101		tumour: % nucleous Positive Tissue (strong)	22.2418
	tumour: % cd31 Positive Tissue	2.75499		tumour: % cd31 Positive Tissue	1.87341		tumour: % cd31 Positive Tissue	3.164		tumour: % cd31 Positive Tissue	2.33143		tumour: % cd31 Positive Tissue	2.5184		tumour: % cd31 Positive Tissue	1.10307		tumour: % cd31 Positive Tissue	2.93552		tumour: % cd31 Positive Tissue	2.2609		2.36772
	tumour: % cd31 Positive Tissue (weak)	0.969979		tumour: % cd31 Positive Tissue (weak)	0.771388		tumour: % cd31 Positive Tissue (weak)	1.10957		tumour: % cd31 Positive Tissue (weak)	0.835305		tumour: % cd31 Positive Tissue (weak)	0.850029		tumour: % cd31 Positive Tissue (weak)	0.34027		tumour: % cd31 Positive Tissue (weak)	1.07889		tumour: % cd31 Positive Tissue (weak)	1.07679
	tumour: % cd31 Positive Tissue (moderate)	0.832226		tumour: % cd31 Positive Tissue (moderate)	0.622944		tumour: % cd31 Positive Tissue (moderate)	1.02034		tumour: % cd31 Positive Tissue (moderate)	0.734426		tumour: % cd31 Positive Tissue (moderate)	0.772293		tumour: % cd31 Positive Tissue (moderate)	0.320281		tumour: % cd31 Positive Tissue (moderate)	0.921849		tumour: % cd31 Positive Tissue (moderate)	0.744787
	tumour: % cd31 Positive Tissue (strong)	0.952789		tumour: % cd31 Positive Tissue (strong)	0.479077		tumour: % cd31 Positive Tissue (strong)	1.03409		tumour: % cd31 Positive Tissue (strong)	0.761704		tumour: % cd31 Positive Tissue (strong)	0.89608		tumour: % cd31 Positive Tissue (strong)	0.442521		tumour: % cd31 Positive Tissue (strong)	0.934783		tumour: % cd31 Positive Tissue (strong)	0.439325
	tumour: nucleous Average Positive Optical Density	0.37408		tumour: nucleous Average Positive Optical Density	0.359411		tumour: nucleous Average Positive Optical Density	0.36902		tumour: nucleous Average Positive Optical Density	0.351882		tumour: nucleous Average Positive Optical Density	0.361392		tumour: nucleous Average Positive Optical Density	0.378154		tumour: nucleous Average Positive Optical Density	0.378163		tumour: nucleous Average Positive Optical Density	0.375166
	tumour: cd31 Average Positive Optical Density	0.614431		tumour: cd31 Average Positive Optical Density	0.56997		tumour: cd31 Average Positive Optical Density	0.603713		tumour: cd31 Average Positive Optical Density	0.607901		tumour: cd31 Average Positive Optical Density	0.622877		tumour: cd31 Average Positive Optical Density	0.647196		tumour: cd31 Average Positive Optical Density	0.598341		tumour: cd31 Average Positive Optical Density	0.5431
	tumour: % Negative Tissue	57.802		tumour: % Negative Tissue	45.3761		tumour: % Negative Tissue	51.268		tumour: % Negative Tissue	48.3152		tumour: % Negative Tissue	47.3077		tumour: % Negative Tissue	52.4789		tumour: % Negative Tissue	35.2924		tumour: % Negative Tissue	48.0479
	BSNA24.1d	HOM
	Name	Value		Name	Value		Name	Value		Name	Value		Name	Value		Name	Value		Name	Value		Name	Value
	Classified Area (mm²)	0.48408		Classified Area (mm²)	0.47773		Classified Area (mm²)	0.57496		Classified Area (mm²)	0.41484		Classified Area (mm²)	0.45997		Classified Area (mm²)	0.79406		Classified Area (mm²)	0.76572		Classified Area (mm²)	0.96131
	tumour Area (mm²)	0.48331		tumour Area (mm²)	0.41463		tumour Area (mm²)	0.53215		tumour Area (mm²)	0.41107		tumour Area (mm²)	0.44681		tumour Area (mm²)	0.7796		tumour Area (mm²)	0.7643		tumour Area (mm²)	0.95875
	Necrosis Area (mm²)	0		Necrosis Area (mm²)	0.05339		Necrosis Area (mm²)	0.0132		Necrosis Area (mm²)	0.00292		Necrosis Area (mm²)	0.00676		Necrosis Area (mm²)	0.00019		Necrosis Area (mm²)	0		Necrosis Area (mm²)	0
	Empty Area (mm²)	0.00077		Empty Area (mm²)	0.00971		Empty Area (mm²)	0.0296		Empty Area (mm²)	0.00085		Empty Area (mm²)	0.00639		Empty Area (mm²)	0.01426		Empty Area (mm²)	0.00143		Empty Area (mm²)	0.00256
	Normal Area (mm²)	0		Normal Area (mm²)	0		Normal Area (mm²)	0		Normal Area (mm²)	0		Normal Area (mm²)	0		Normal Area (mm²)	2e-05		Normal Area (mm²)	0		Normal Area (mm²)	0
	Tissue Area Analyzed (μm²)	477532		Tissue Area Analyzed (μm²)	322610		Tissue Area Analyzed (μm²)	489943		Tissue Area Analyzed (μm²)	407195		Tissue Area Analyzed (μm²)	434821		Tissue Area Analyzed (μm²)	766184		Tissue Area Analyzed (μm²)	761690		Tissue Area Analyzed (μm²)	944284
	nucleous Area (μm²)	173253		nucleous Area (μm²)	115229		nucleous Area (μm²)	185558		nucleous Area (μm²)	162794		nucleous Area (μm²)	161225		nucleous Area (μm²)	323161		nucleous Area (μm²)	351515		nucleous Area (μm²)	391973
	nucleous Weak Area (μm²)	69677.7		nucleous Weak Area (μm²)	41419.3		nucleous Weak Area (μm²)	72186		nucleous Weak Area (μm²)	65280.1		nucleous Weak Area (μm²)	62479.3		nucleous Weak Area (μm²)	118949		nucleous Weak Area (μm²)	130524		nucleous Weak Area (μm²)	155566
	nucleous Moderate Area (μm²)	43854.8		nucleous Moderate Area (μm²)	27049.4		nucleous Moderate Area (μm²)	46699.4		nucleous Moderate Area (μm²)	40790.4		nucleous Moderate Area (μm²)	39308		nucleous Moderate Area (μm²)	78006.2		nucleous Moderate Area (μm²)	83942.3		nucleous Moderate Area (μm²)	100242
	nucleous Strong Area (μm²)	59720.5		nucleous Strong Area (μm²)	46760.1		nucleous Strong Area (μm²)	66672.9		nucleous Strong Area (μm²)	56723.1		nucleous Strong Area (μm²)	59438.1		nucleous Strong Area (μm²)	126206		nucleous Strong Area (μm²)	137049		nucleous Strong Area (μm²)	136165
	cd31 Area (μm²)	7484.51		cd31 Area (μm²)	8907.69		cd31 Area (μm²)	11670.8		cd31 Area (μm²)	8133.99		cd31 Area (μm²)	11157.2		cd31 Area (μm²)	16996.4		cd31 Area (μm²)	13754.3		cd31 Area (μm²)	13436.8
	cd31 Weak Area (μm²)	2797.01		cd31 Weak Area (μm²)	3028.26		cd31 Weak Area (μm²)	3767.81		cd31 Weak Area (μm²)	2755.01		cd31 Weak Area (μm²)	3409.04		cd31 Weak Area (μm²)	6191.89		cd31 Weak Area (μm²)	5498.9		cd31 Weak Area (μm²)	5050.82
	cd31 Moderate Area (μm²)	2447.1		cd31 Moderate Area (μm²)	2734.27		cd31 Moderate Area (μm²)	3547.44		cd31 Moderate Area (μm²)	2544.51		cd31 Moderate Area (μm²)	3357.68		cd31 Moderate Area (μm²)	5327.61		cd31 Moderate Area (μm²)	4486.1		cd31 Moderate Area (μm²)	4382.62
	cd31 Strong Area (μm²)	2240.39		cd31 Strong Area (μm²)	3145.15		cd31 Strong Area (μm²)	4355.55		cd31 Strong Area (μm²)	2834.46		cd31 Strong Area (μm²)	4390.47		cd31 Strong Area (μm²)	5476.89		cd31 Strong Area (μm²)	3769.33		cd31 Strong Area (μm²)	4003.36
	% nucleous Positive Tissue	36.2809		% nucleous Positive Tissue	35.7177		% nucleous Positive Tissue	37.8735		% nucleous Positive Tissue	39.9793		% nucleous Positive Tissue	37.0786		% nucleous Positive Tissue	42.178		% nucleous Positive Tissue	46.1493		% nucleous Positive Tissue	41.5101
	% nucleous Positive Tissue (weak)	14.5912		% nucleous Positive Tissue (weak)	12.8388		% nucleous Positive Tissue (weak)	14.7336		% nucleous Positive Tissue (weak)	16.0317		% nucleous Positive Tissue (weak)	14.369		% nucleous Positive Tissue (weak)	15.5248		% nucleous Positive Tissue (weak)	17.1361		% nucleous Positive Tissue (weak)	16.4745
	% nucleous Positive Tissue (moderate)	9.18364		% nucleous Positive Tissue (moderate)	8.38455		% nucleous Positive Tissue (moderate)	9.53161		% nucleous Positive Tissue (moderate)	10.0174		% nucleous Positive Tissue (moderate)	9.04004		% nucleous Positive Tissue (moderate)	10.1811		% nucleous Positive Tissue (moderate)	11.0205		% nucleous Positive Tissue (moderate)	10.6157
	% nucleous Positive Tissue (strong)	12.5061		% nucleous Positive Tissue (strong)	14.4943		% nucleous Positive Tissue (strong)	13.6083		% nucleous Positive Tissue (strong)	13.9302		% nucleous Positive Tissue (strong)	13.6696		% nucleous Positive Tissue (strong)	16.472		% nucleous Positive Tissue (strong)	17.9927		% nucleous Positive Tissue (strong)	14.42
	% cd31 Positive Tissue	1.56733		% cd31 Positive Tissue	2.76113		% cd31 Positive Tissue	2.38207		% cd31 Positive Tissue	1.99757		% cd31 Positive Tissue	2.56593		% cd31 Positive Tissue	2.21832		% cd31 Positive Tissue	1.80577		% cd31 Positive Tissue	1.42296
	% cd31 Positive Tissue (weak)	0.585723		% cd31 Positive Tissue (weak)	0.938675		% cd31 Positive Tissue (weak)	0.769031		% cd31 Positive Tissue (weak)	0.676584		% cd31 Positive Tissue (weak)	0.784011		% cd31 Positive Tissue (weak)	0.808146		% cd31 Positive Tissue (weak)	0.721934		% cd31 Positive Tissue (weak)	0.534883
	% cd31 Positive Tissue (moderate)	0.512448		% cd31 Positive Tissue (moderate)	0.847545		% cd31 Positive Tissue (moderate)	0.724052		% cd31 Positive Tissue (moderate)	0.624888		% cd31 Positive Tissue (moderate)	0.772199		% cd31 Positive Tissue (moderate)	0.695343		% cd31 Positive Tissue (moderate)	0.588967		% cd31 Positive Tissue (moderate)	0.464121
	% cd31 Positive Tissue (strong)	0.469161		% cd31 Positive Tissue (strong)	0.974908		% cd31 Positive Tissue (strong)	0.888992		% cd31 Positive Tissue (strong)	0.696094		% cd31 Positive Tissue (strong)	1.00972		% cd31 Positive Tissue (strong)	0.714826		% cd31 Positive Tissue (strong)	0.494864		% cd31 Positive Tissue (strong)	0.423957
	nucleous Average Positive Optical Density	0.31668		nucleous Average Positive Optical Density	0.348472		nucleous Average Positive Optical Density	0.328336		nucleous Average Positive Optical Density	0.320083		nucleous Average Positive Optical Density	0.327447		nucleous Average Positive Optical Density	0.338714		nucleous Average Positive Optical Density	0.337009		nucleous Average Positive Optical Density	0.321543
	cd31 Average Positive Optical Density	0.587753		cd31 Average Positive Optical Density	0.623979		cd31 Average Positive Optical Density	0.630666		cd31 Average Positive Optical Density	0.612285		cd31 Average Positive Optical Density	0.638524		cd31 Average Positive Optical Density	0.60431		cd31 Average Positive Optical Density	0.578613		cd31 Average Positive Optical Density	0.588009
	% Negative Tissue	62.4465		% Negative Tissue	62.0853		% Negative Tissue	60.1659		% Negative Tissue	58.3849		% Negative Tissue	60.8227		% Negative Tissue	56.0297		% Negative Tissue	52.415		% Negative Tissue	57.4523
	tumour: Tissue Area Analyzed (μm²)	477532		tumour: Tissue Area Analyzed (μm²)	322610		tumour: Tissue Area Analyzed (μm²)	489943		tumour: Tissue Area Analyzed (μm²)	407195		tumour: Tissue Area Analyzed (μm²)	434821		tumour: Tissue Area Analyzed (μm²)	766184		tumour: Tissue Area Analyzed (μm²)	761690		tumour: Tissue Area Analyzed (μm²)	944284
	tumour: nucleous Area (μm²)	173253		tumour: nucleous Area (μm²)	115229		tumour: nucleous Area (μm²)	185558		tumour: nucleous Area (μm²)	162794		tumour: nucleous Area (μm²)	161225		tumour: nucleous Area (μm²)	323161		tumour: nucleous Area (μm²)	351515		tumour: nucleous Area (μm²)	391973
	tumour: nucleous Weak Area (μm²)	69677.7		tumour: nucleous Weak Area (μm²)	41419.3		tumour: nucleous Weak Area (μm²)	72186		tumour: nucleous Weak Area (μm²)	65280.1		tumour: nucleous Weak Area (μm²)	62479.3		tumour: nucleous Weak Area (μm²)	118949		tumour: nucleous Weak Area (μm²)	130524		tumour: nucleous Weak Area (μm²)	155566
	tumour: nucleous Moderate Area (μm²)	43854.8		tumour: nucleous Moderate Area (μm²)	27049.4		tumour: nucleous Moderate Area (μm²)	46699.4		tumour: nucleous Moderate Area (μm²)	40790.4		tumour: nucleous Moderate Area (μm²)	39308		tumour: nucleous Moderate Area (μm²)	78006.2		tumour: nucleous Moderate Area (μm²)	83942.3		tumour: nucleous Moderate Area (μm²)	100242
	tumour: nucleous Strong Area (μm²)	59720.5		tumour: nucleous Strong Area (μm²)	46760.1		tumour: nucleous Strong Area (μm²)	66672.9		tumour: nucleous Strong Area (μm²)	56723.1	0	tumour: nucleous Strong Area (μm²)	59438.1		tumour: nucleous Strong Area (μm²)	126206		tumour: nucleous Strong Area (μm²)	137049		tumour: nucleous Strong Area (μm²)	136165
	tumour: cd31 Area (μm²)	7484.51		tumour: cd31 Area (μm²)	8907.69		tumour: cd31 Area (μm²)	11670.8		tumour: cd31 Area (μm²)	8133.99		tumour: cd31 Area (μm²)	11157.2		tumour: cd31 Area (μm²)	16996.4		tumour: cd31 Area (μm²)	13754.3		tumour: cd31 Area (μm²)	13436.8
	tumour: cd31 Weak Area (μm²)	2797.01		tumour: cd31 Weak Area (μm²)	3028.26		tumour: cd31 Weak Area (μm²)	3767.81		tumour: cd31 Weak Area (μm²)	2755.01		tumour: cd31 Weak Area (μm²)	3409.04		tumour: cd31 Weak Area (μm²)	6191.89		tumour: cd31 Weak Area (μm²)	5498.9		tumour: cd31 Weak Area (μm²)	5050.82
	tumour: cd31 Moderate Area (μm²)	2447.1		tumour: cd31 Moderate Area (μm²)	2734.27		tumour: cd31 Moderate Area (μm²)	3547.44		tumour: cd31 Moderate Area (μm²)	2544.51		tumour: cd31 Moderate Area (μm²)	3357.68		tumour: cd31 Moderate Area (μm²)	5327.61		tumour: cd31 Moderate Area (μm²)	4486.1		tumour: cd31 Moderate Area (μm²)	4382.62
	tumour: cd31 Strong Area (μm²)	2240.39		tumour: cd31 Strong Area (μm²)	3145.15		tumour: cd31 Strong Area (μm²)	4355.55		tumour: cd31 Strong Area (μm²)	2834.46		tumour: cd31 Strong Area (μm²)	4390.47		tumour: cd31 Strong Area (μm²)	5476.89		tumour: cd31 Strong Area (μm²)	3769.33		tumour: cd31 Strong Area (μm²)	4003.36
	tumour: % nucleous Positive Tissue	36.2809		tumour: % nucleous Positive Tissue	35.7177		tumour: % nucleous Positive Tissue	37.8735		tumour: % nucleous Positive Tissue	39.9793		tumour: % nucleous Positive Tissue	37.0786		tumour: % nucleous Positive Tissue	42.178		tumour: % nucleous Positive Tissue	46.1493		tumour: % nucleous Positive Tissue	41.5101
	tumour: % nucleous Positive Tissue (weak)	14.5912		tumour: % nucleous Positive Tissue (weak)	12.8388		tumour: % nucleous Positive Tissue (weak)	14.7336		tumour: % nucleous Positive Tissue (weak)	16.0317		tumour: % nucleous Positive Tissue (weak)	14.369		tumour: % nucleous Positive Tissue (weak)	15.5248		tumour: % nucleous Positive Tissue (weak)	17.1361		tumour: % nucleous Positive Tissue (weak)	16.4745
	tumour: % nucleous Positive Tissue (moderate)	9.18364		tumour: % nucleous Positive Tissue (moderate)	8.38455		tumour: % nucleous Positive Tissue (moderate)	9.53161		tumour: % nucleous Positive Tissue (moderate)	10.0174		tumour: % nucleous Positive Tissue (moderate)	9.04004		tumour: % nucleous Positive Tissue (moderate)	10.1811		tumour: % nucleous Positive Tissue (moderate)	11.0205		tumour: % nucleous Positive Tissue (moderate)	10.6157
	tumour: % nucleous Positive Tissue (strong)	12.5061		tumour: % nucleous Positive Tissue (strong)	14.4943		tumour: % nucleous Positive Tissue (strong)	13.6083		tumour: % nucleous Positive Tissue (strong)	13.9302		tumour: % nucleous Positive Tissue (strong)	13.6696		tumour: % nucleous Positive Tissue (strong)	16.472		tumour: % nucleous Positive Tissue (strong)	17.9927		tumour: % nucleous Positive Tissue (strong)	14.42
	tumour: % cd31 Positive Tissue	1.56733		tumour: % cd31 Positive Tissue	2.76113		tumour: % cd31 Positive Tissue	2.38207		tumour: % cd31 Positive Tissue	1.99757		tumour: % cd31 Positive Tissue	2.56593		tumour: % cd31 Positive Tissue	2.21832		tumour: % cd31 Positive Tissue	1.80577		tumour: % cd31 Positive Tissue	1.42296		2.09013
	tumour: % cd31 Positive Tissue (weak)	0.585723		tumour: % cd31 Positive Tissue (weak)	0.938675		tumour: % cd31 Positive Tissue (weak)	0.769031		tumour: % cd31 Positive Tissue (weak)	0.676584		tumour: % cd31 Positive Tissue (weak)	0.784011		tumour: % cd31 Positive Tissue (weak)	0.808146		tumour: % cd31 Positive Tissue (weak)	0.721934		tumour: % cd31 Positive Tissue (weak)	0.534883
	tumour: % cd31 Positive Tissue (moderate)	0.512448		tumour: % cd31 Positive Tissue (moderate)	0.847545		tumour: % cd31 Positive Tissue (moderate)	0.724052		tumour: % cd31 Positive Tissue (moderate)	0.624888		tumour: % cd31 Positive Tissue (moderate)	0.772199		tumour: % cd31 Positive Tissue (moderate)	0.695343		tumour: % cd31 Positive Tissue (moderate)	0.588967		tumour: % cd31 Positive Tissue (moderate)	0.464121
	tumour: % cd31 Positive Tissue (strong)	0.469161		tumour: % cd31 Positive Tissue (strong)	0.974908		tumour: % cd31 Positive Tissue (strong)	0.888992		tumour: % cd31 Positive Tissue (strong)	0.696094		tumour: % cd31 Positive Tissue (strong)	1.00972		tumour: % cd31 Positive Tissue (strong)	0.714826		tumour: % cd31 Positive Tissue (strong)	0.494864		tumour: % cd31 Positive Tissue (strong)	0.423957
	tumour: nucleous Average Positive Optical Density	0.31668		tumour: nucleous Average Positive Optical Density	0.348472		tumour: nucleous Average Positive Optical Density	0.328336		tumour: nucleous Average Positive Optical Density	0.320083		tumour: nucleous Average Positive Optical Density	0.327447		tumour: nucleous Average Positive Optical Density	0.338714		tumour: nucleous Average Positive Optical Density	0.337009		tumour: nucleous Average Positive Optical Density	0.321543
	tumour: cd31 Average Positive Optical Density	0.587753		tumour: cd31 Average Positive Optical Density	0.623979		tumour: cd31 Average Positive Optical Density	0.630666		tumour: cd31 Average Positive Optical Density	0.612285		tumour: cd31 Average Positive Optical Density	0.638524		tumour: cd31 Average Positive Optical Density	0.60431		tumour: cd31 Average Positive Optical Density	0.578613		tumour: cd31 Average Positive Optical Density	0.588009
	tumour: % Negative Tissue	62.4465		tumour: % Negative Tissue	62.0853		tumour: % Negative Tissue	60.1659		tumour: % Negative Tissue	58.3849		tumour: % Negative Tissue	60.8227		tumour: % Negative Tissue	56.0297		tumour: % Negative Tissue	52.415		tumour: % Negative Tissue	57.4523
	BAJF108.1f	WT
	Name	Value		Name	Value		Name	Value		Name	Value		Name	Value		Name	Value		Name	Value		Name	Value
	Classified Area (mm²)	0.61307		Classified Area (mm²)	0.56711		Classified Area (mm²)	0.62911		Classified Area (mm²)	0.62478		Classified Area (mm²)	0.4629		Classified Area (mm²)	0.61062		Classified Area (mm²)	0.71432		Classified Area (mm²)	0.74024
	tumour Area (mm²)	0.61307		tumour Area (mm²)	0.56563		tumour Area (mm²)	0.62688		tumour Area (mm²)	0.62287		tumour Area (mm²)	0.46085		tumour Area (mm²)	0.60655		tumour Area (mm²)	0.67033		tumour Area (mm²)	0.73522
	Necrosis Area (mm²)	0		Necrosis Area (mm²)	0		Necrosis Area (mm²)	0		Necrosis Area (mm²)	0		Necrosis Area (mm²)	0		Necrosis Area (mm²)	0.00026		Necrosis Area (mm²)	0.00879		Necrosis Area (mm²)	0
	Empty Area (mm²)	0		Empty Area (mm²)	0.00147		Empty Area (mm²)	0.00223		Empty Area (mm²)	0.00184		Empty Area (mm²)	0.00205		Empty Area (mm²)	0.00381		Empty Area (mm²)	0.0352		Empty Area (mm²)	0.00501
	Normal Area (mm²)	0		Normal Area (mm²)	0		Normal Area (mm²)	0		Normal Area (mm²)	6e-05		Normal Area (mm²)	0		Normal Area (mm²)	0		Normal Area (mm²)	0		Normal Area (mm²)	0
	Tissue Area Analyzed (μm²)	610026		Tissue Area Analyzed (μm²)	559635		Tissue Area Analyzed (μm²)	621792		Tissue Area Analyzed (μm²)	601632		Tissue Area Analyzed (μm²)	458179		Tissue Area Analyzed (μm²)	602168		Tissue Area Analyzed (μm²)	613369		Tissue Area Analyzed (μm²)	728759
	nucleous Area (μm²)	308507		nucleous Area (μm²)	228687		nucleous Area (μm²)	220030		nucleous Area (μm²)	301368		nucleous Area (μm²)	171590		nucleous Area (μm²)	217644		nucleous Area (μm²)	214127		nucleous Area (μm²)	329049
	nucleous Weak Area (μm²)	105400		nucleous Weak Area (μm²)	87791.6		nucleous Weak Area (μm²)	87311.1		nucleous Weak Area (μm²)	91431.4		nucleous Weak Area (μm²)	65824.8		nucleous Weak Area (μm²)	83302.2		nucleous Weak Area (μm²)	80848.3		nucleous Weak Area (μm²)	113738
	nucleous Moderate Area (μm²)	75860.4		nucleous Moderate Area (μm²)	55834.5		nucleous Moderate Area (μm²)	53899.3		nucleous Moderate Area (μm²)	69339.1		nucleous Moderate Area (μm²)	38835.4		nucleous Moderate Area (μm²)	51219.1		nucleous Moderate Area (μm²)	50085.2		nucleous Moderate Area (μm²)	75536.3
	nucleous Strong Area (μm²)	127247		nucleous Strong Area (μm²)	85060.6		nucleous Strong Area (μm²)	78819.4		nucleous Strong Area (μm²)	140598		nucleous Strong Area (μm²)	66929.7		nucleous Strong Area (μm²)	83123.1		nucleous Strong Area (μm²)	83193.9		nucleous Strong Area (μm²)	139774
	cd31 Area (μm²)	2209.27		cd31 Area (μm²)	11459.3		cd31 Area (μm²)	10719.2		cd31 Area (μm²)	3302.53		cd31 Area (μm²)	7519.17		cd31 Area (μm²)	10616.5		cd31 Area (μm²)	13970.9		cd31 Area (μm²)	7017.96
	cd31 Weak Area (μm²)	1043.66		cd31 Weak Area (μm²)	3152.75		cd31 Weak Area (μm²)	3635.49		cd31 Weak Area (μm²)	1429.75		cd31 Weak Area (μm²)	2740.85		cd31 Weak Area (μm²)	3323.27		cd31 Weak Area (μm²)	3938.34		cd31 Weak Area (μm²)	2830.41
	cd31 Moderate Area (μm²)	717.534		cd31 Moderate Area (μm²)	3180.32		cd31 Moderate Area (μm²)	3405.5		cd31 Moderate Area (μm²)	1018.11		cd31 Moderate Area (μm²)	2381.83		cd31 Moderate Area (μm²)	3237.25		cd31 Moderate Area (μm²)	3966.93		cd31 Moderate Area (μm²)	2220.66
	cd31 Strong Area (μm²)	448.079		cd31 Strong Area (μm²)	5126.22		cd31 Strong Area (μm²)	3678.24		cd31 Strong Area (μm²)	854.664		cd31 Strong Area (μm²)	2396.5		cd31 Strong Area (μm²)	4055.99		cd31 Strong Area (μm²)	6065.64		cd31 Strong Area (μm²)	1966.89
	% nucleous Positive Tissue	50.5728		% nucleous Positive Tissue	40.8636		% nucleous Positive Tissue	35.3864		% nucleous Positive Tissue	50.0918		% nucleous Positive Tissue	37.4504		% nucleous Positive Tissue	36.1435		% nucleous Positive Tissue	34.91		% nucleous Positive Tissue	45.1519
	% nucleous Positive Tissue (weak)	17.278		% nucleous Positive Tissue (weak)	15.6873		% nucleous Positive Tissue (weak)	14.0419		% nucleous Positive Tissue (weak)	15.1972		% nucleous Positive Tissue (weak)	14.3666		% nucleous Positive Tissue (weak)	13.8337		% nucleous Positive Tissue (weak)	13.181		% nucleous Positive Tissue (weak)	15.6071
	% nucleous Positive Tissue (moderate)	12.4356		% nucleous Positive Tissue (moderate)	9.97696		% nucleous Positive Tissue (moderate)	8.66837		% nucleous Positive Tissue (moderate)	11.5252		% nucleous Positive Tissue (moderate)	8.47603		% nucleous Positive Tissue (moderate)	8.50579		% nucleous Positive Tissue (moderate)	8.16558		% nucleous Positive Tissue (moderate)	10.3651
	% nucleous Positive Tissue (strong)	20.8592		% nucleous Positive Tissue (strong)	15.1993		% nucleous Positive Tissue (strong)	12.6762		% nucleous Positive Tissue (strong)	23.3694		% nucleous Positive Tissue (strong)	14.6078		% nucleous Positive Tissue (strong)	13.804		% nucleous Positive Tissue (strong)	13.5634		% nucleous Positive Tissue (strong)	19.1798
	% cd31 Positive Tissue	0.362161		% cd31 Positive Tissue	2.04764		% cd31 Positive Tissue	1.72392		% cd31 Positive Tissue	0.548928		% cd31 Positive Tissue	1.6411		% cd31 Positive Tissue	1.76305		% cd31 Positive Tissue	2.27773		% cd31 Positive Tissue	0.963002
	% cd31 Positive Tissue (weak)	0.171085		% cd31 Positive Tissue (weak)	0.563358		% cd31 Positive Tissue (weak)	0.584679		% cd31 Positive Tissue (weak)	0.237646		% cd31 Positive Tissue (weak)	0.598205		% cd31 Positive Tissue (weak)	0.551885		% cd31 Positive Tissue (weak)	0.642083		% cd31 Positive Tissue (weak)	0.388388
	% cd31 Positive Tissue (moderate)	0.117623		% cd31 Positive Tissue (moderate)	0.568286		% cd31 Positive Tissue (moderate)	0.547691		% cd31 Positive Tissue (moderate)	0.169224		% cd31 Positive Tissue (moderate)	0.519847		% cd31 Positive Tissue (moderate)	0.537599		% cd31 Positive Tissue (moderate)	0.646744		% cd31 Positive Tissue (moderate)	0.304718
	% cd31 Positive Tissue (strong)	0.073452		% cd31 Positive Tissue (strong)	0.915993		% cd31 Positive Tissue (strong)	0.591555		% cd31 Positive Tissue (strong)	0.142058		% cd31 Positive Tissue (strong)	0.523049		% cd31 Positive Tissue (strong)	0.673564		% cd31 Positive Tissue (strong)	0.988904		% cd31 Positive Tissue (strong)	0.269896
	nucleous Average Positive Optical Density	0.337522		nucleous Average Positive Optical Density	0.329178		nucleous Average Positive Optical Density	0.325778		nucleous Average Positive Optical Density	0.358235	0	nucleous Average Positive Optical Density	0.343709		nucleous Average Positive Optical Density	0.334556		nucleous Average Positive Optical Density	0.339136		nucleous Average Positive Optical Density	0.35046
	cd31 Average Positive Optical Density	0.545355		cd31 Average Positive Optical Density	0.674208		cd31 Average Positive Optical Density	0.607756		cd31 Average Positive Optical Density	0.571059		cd31 Average Positive Optical Density	0.596723		cd31 Average Positive Optical Density	0.633615		cd31 Average Positive Optical Density	0.669626		cd31 Average Positive Optical Density	0.581533
	% Negative Tissue	49.129		% Negative Tissue	57.4851		% Negative Tissue	63.1283		% Negative Tissue	49.4755		% Negative Tissue	61.1934		% Negative Tissue	62.3445		% Negative Tissue	63.1917		% Negative Tissue	54.0455
	tumour: Tissue Area Analyzed (μm²)	610026		tumour: Tissue Area Analyzed (μm²)	559635		tumour: Tissue Area Analyzed (μm²)	621792		tumour: Tissue Area Analyzed (μm²)	601632		tumour: Tissue Area Analyzed (μm²)	458179		tumour: Tissue Area Analyzed (μm²)	602168		tumour: Tissue Area Analyzed (μm²)	613369		tumour: Tissue Area Analyzed (μm²)	728759
	tumour: nucleous Area (μm²)	308507		tumour: nucleous Area (μm²)	228687		tumour: nucleous Area (μm²)	220030		tumour: nucleous Area (μm²)	301368		tumour: nucleous Area (μm²)	171590		tumour: nucleous Area (μm²)	217644		tumour: nucleous Area (μm²)	214127		tumour: nucleous Area (μm²)	329049
	tumour: nucleous Weak Area (μm²)	105400		tumour: nucleous Weak Area (μm²)	87791.6		tumour: nucleous Weak Area (μm²)	87311.1		tumour: nucleous Weak Area (μm²)	91431.4		tumour: nucleous Weak Area (μm²)	65824.8		tumour: nucleous Weak Area (μm²)	83302.2		tumour: nucleous Weak Area (μm²)	80848.3		tumour: nucleous Weak Area (μm²)	113738
	tumour: nucleous Moderate Area (μm²)	75860.4		tumour: nucleous Moderate Area (μm²)	55834.5		tumour: nucleous Moderate Area (μm²)	53899.3		tumour: nucleous Moderate Area (μm²)	69339.1		tumour: nucleous Moderate Area (μm²)	38835.4		tumour: nucleous Moderate Area (μm²)	51219.1		tumour: nucleous Moderate Area (μm²)	50085.2		tumour: nucleous Moderate Area (μm²)	75536.3
	tumour: nucleous Strong Area (μm²)	127247		tumour: nucleous Strong Area (μm²)	85060.6		tumour: nucleous Strong Area (μm²)	78819.4		tumour: nucleous Strong Area (μm²)	140598		tumour: nucleous Strong Area (μm²)	66929.7		tumour: nucleous Strong Area (μm²)	83123.1		tumour: nucleous Strong Area (μm²)	83193.9		tumour: nucleous Strong Area (μm²)	139774
	tumour: cd31 Area (μm²)	2209.27		tumour: cd31 Area (μm²)	11459.3		tumour: cd31 Area (μm²)	10719.2		tumour: cd31 Area (μm²)	3302.53		tumour: cd31 Area (μm²)	7519.17		tumour: cd31 Area (μm²)	10616.5		tumour: cd31 Area (μm²)	13970.9		tumour: cd31 Area (μm²)	7017.96
	tumour: cd31 Weak Area (μm²)	1043.66		tumour: cd31 Weak Area (μm²)	3152.75		tumour: cd31 Weak Area (μm²)	3635.49		tumour: cd31 Weak Area (μm²)	1429.75		tumour: cd31 Weak Area (μm²)	2740.85		tumour: cd31 Weak Area (μm²)	3323.27		tumour: cd31 Weak Area (μm²)	3938.34		tumour: cd31 Weak Area (μm²)	2830.41
	tumour: cd31 Moderate Area (μm²)	717.534		tumour: cd31 Moderate Area (μm²)	3180.32		tumour: cd31 Moderate Area (μm²)	3405.5		tumour: cd31 Moderate Area (μm²)	1018.11		tumour: cd31 Moderate Area (μm²)	2381.83		tumour: cd31 Moderate Area (μm²)	3237.25		tumour: cd31 Moderate Area (μm²)	3966.93		tumour: cd31 Moderate Area (μm²)	2220.66
	tumour: cd31 Strong Area (μm²)	448.079		tumour: cd31 Strong Area (μm²)	5126.22		tumour: cd31 Strong Area (μm²)	3678.24		tumour: cd31 Strong Area (μm²)	854.664		tumour: cd31 Strong Area (μm²)	2396.5		tumour: cd31 Strong Area (μm²)	4055.99		tumour: cd31 Strong Area (μm²)	6065.64		tumour: cd31 Strong Area (μm²)	1966.89
	tumour: % nucleous Positive Tissue	50.5728		tumour: % nucleous Positive Tissue	40.8636		tumour: % nucleous Positive Tissue	35.3864		tumour: % nucleous Positive Tissue	50.0918		tumour: % nucleous Positive Tissue	37.4504		tumour: % nucleous Positive Tissue	36.1435		tumour: % nucleous Positive Tissue	34.91		tumour: % nucleous Positive Tissue	45.1519
	tumour: % nucleous Positive Tissue (weak)	17.278		tumour: % nucleous Positive Tissue (weak)	15.6873		tumour: % nucleous Positive Tissue (weak)	14.0419		tumour: % nucleous Positive Tissue (weak)	15.1972		tumour: % nucleous Positive Tissue (weak)	14.3666		tumour: % nucleous Positive Tissue (weak)	13.8337		tumour: % nucleous Positive Tissue (weak)	13.181		tumour: % nucleous Positive Tissue (weak)	15.6071
	tumour: % nucleous Positive Tissue (moderate)	12.4356		tumour: % nucleous Positive Tissue (moderate)	9.97696		tumour: % nucleous Positive Tissue (moderate)	8.66837		tumour: % nucleous Positive Tissue (moderate)	11.5252		tumour: % nucleous Positive Tissue (moderate)	8.47603		tumour: % nucleous Positive Tissue (moderate)	8.50579		tumour: % nucleous Positive Tissue (moderate)	8.16558		tumour: % nucleous Positive Tissue (moderate)	10.3651
	tumour: % nucleous Positive Tissue (strong)	20.8592		tumour: % nucleous Positive Tissue (strong)	15.1993		tumour: % nucleous Positive Tissue (strong)	12.6762		tumour: % nucleous Positive Tissue (strong)	23.3694		tumour: % nucleous Positive Tissue (strong)	14.6078		tumour: % nucleous Positive Tissue (strong)	13.804		tumour: % nucleous Positive Tissue (strong)	13.5634		tumour: % nucleous Positive Tissue (strong)	19.1798
	tumour: % cd31 Positive Tissue	0.362161		tumour: % cd31 Positive Tissue	2.04764		tumour: % cd31 Positive Tissue	1.72392		tumour: % cd31 Positive Tissue	0.548928		tumour: % cd31 Positive Tissue	1.6411		tumour: % cd31 Positive Tissue	1.76305		tumour: % cd31 Positive Tissue	2.27773		tumour: % cd31 Positive Tissue	0.963002		1.41594
	tumour: % cd31 Positive Tissue (weak)	0.171085		tumour: % cd31 Positive Tissue (weak)	0.563358		tumour: % cd31 Positive Tissue (weak)	0.584679		tumour: % cd31 Positive Tissue (weak)	0.237646		tumour: % cd31 Positive Tissue (weak)	0.598205		tumour: % cd31 Positive Tissue (weak)	0.551885		tumour: % cd31 Positive Tissue (weak)	0.642083		tumour: % cd31 Positive Tissue (weak)	0.388388
	tumour: % cd31 Positive Tissue (moderate)	0.117623		tumour: % cd31 Positive Tissue (moderate)	0.568286		tumour: % cd31 Positive Tissue (moderate)	0.547691		tumour: % cd31 Positive Tissue (moderate)	0.169224		tumour: % cd31 Positive Tissue (moderate)	0.519847		tumour: % cd31 Positive Tissue (moderate)	0.537599		tumour: % cd31 Positive Tissue (moderate)	0.646744		tumour: % cd31 Positive Tissue (moderate)	0.304718
	tumour: % cd31 Positive Tissue (strong)	0.073452		tumour: % cd31 Positive Tissue (strong)	0.915993		tumour: % cd31 Positive Tissue (strong)	0.591555		tumour: % cd31 Positive Tissue (strong)	0.142058		tumour: % cd31 Positive Tissue (strong)	0.523049		tumour: % cd31 Positive Tissue (strong)	0.673564		tumour: % cd31 Positive Tissue (strong)	0.988904		tumour: % cd31 Positive Tissue (strong)	0.269896
	tumour: nucleous Average Positive Optical Density	0.337522		tumour: nucleous Average Positive Optical Density	0.329178		tumour: nucleous Average Positive Optical Density	0.325778		tumour: nucleous Average Positive Optical Density	0.358235		tumour: nucleous Average Positive Optical Density	0.343709		tumour: nucleous Average Positive Optical Density	0.334556		tumour: nucleous Average Positive Optical Density	0.339136		tumour: nucleous Average Positive Optical Density	0.35046
	tumour: cd31 Average Positive Optical Density	0.545355		tumour: cd31 Average Positive Optical Density	0.674208		tumour: cd31 Average Positive Optical Density	0.607756		tumour: cd31 Average Positive Optical Density	0.571059		tumour: cd31 Average Positive Optical Density	0.596723		tumour: cd31 Average Positive Optical Density	0.633615		tumour: cd31 Average Positive Optical Density	0.669626		tumour: cd31 Average Positive Optical Density	0.581533
	tumour: % Negative Tissue	49.129		tumour: % Negative Tissue	57.4851		tumour: % Negative Tissue	63.1283		tumour: % Negative Tissue	49.4755		tumour: % Negative Tissue	61.1934		tumour: % Negative Tissue	62.3445		tumour: % Negative Tissue	63.1917		tumour: % Negative Tissue	54.0455
	BSNA9.1d	HOM
	Name	Value		Name	Value		Name	Value		Name	Value		Name	Value		Name	Value		Name	Value		Name	Value
	Classified Area (mm²)	0.8868		Classified Area (mm²)	0.977		Classified Area (mm²)	0.88446		Classified Area (mm²)	0.86957		Classified Area (mm²)	0.76069		Classified Area (mm²)	0.88506		Classified Area (mm²)	0.45192		Classified Area (mm²)	0.74998
	tumour Area (mm²)	0.8618		tumour Area (mm²)	0.97397		tumour Area (mm²)	0.88446		tumour Area (mm²)	0.86814		tumour Area (mm²)	0.76069		tumour Area (mm²)	0.88426		tumour Area (mm²)	0.45192		tumour Area (mm²)	0.74719
	Necrosis Area (mm²)	0.02103		Necrosis Area (mm²)	0		Necrosis Area (mm²)	0		Necrosis Area (mm²)	0		Necrosis Area (mm²)	0		Necrosis Area (mm²)	0		Necrosis Area (mm²)	0		Necrosis Area (mm²)	0
	Empty Area (mm²)	0.00397		Empty Area (mm²)	0.00303		Empty Area (mm²)	0		Empty Area (mm²)	0.00112		Empty Area (mm²)	0		Empty Area (mm²)	0.0008		Empty Area (mm²)	0		Empty Area (mm²)	0.00125
	Normal Area (mm²)	0		Normal Area (mm²)	0		Normal Area (mm²)	0		Normal Area (mm²)	0.0003		Normal Area (mm²)	0		Normal Area (mm²)	0		Normal Area (mm²)	0		Normal Area (mm²)	0.00154
	Tissue Area Analyzed (μm²)	828049		Tissue Area Analyzed (μm²)	967414		Tissue Area Analyzed (μm²)	881722		Tissue Area Analyzed (μm²)	859698		Tissue Area Analyzed (μm²)	759367		Tissue Area Analyzed (μm²)	880243		Tissue Area Analyzed (μm²)	450163		Tissue Area Analyzed (μm²)	743393
	nucleous Area (μm²)	281761		nucleous Area (μm²)	412667		nucleous Area (μm²)	321222		nucleous Area (μm²)	542100		nucleous Area (μm²)	379286		nucleous Area (μm²)	461324		nucleous Area (μm²)	163532		nucleous Area (μm²)	400284
	nucleous Weak Area (μm²)	115235		nucleous Weak Area (μm²)	159016		nucleous Weak Area (μm²)	126037		nucleous Weak Area (μm²)	231267		nucleous Weak Area (μm²)	151908		nucleous Weak Area (μm²)	167292		nucleous Weak Area (μm²)	63396.2		nucleous Weak Area (μm²)	157313
	nucleous Moderate Area (μm²)	67135.7		nucleous Moderate Area (μm²)	95038		nucleous Moderate Area (μm²)	78599.3		nucleous Moderate Area (μm²)	100792		nucleous Moderate Area (μm²)	74932.9		nucleous Moderate Area (μm²)	89794.4		nucleous Moderate Area (μm²)	36533.2		nucleous Moderate Area (μm²)	67660.7
	nucleous Strong Area (μm²)	99389.8		nucleous Strong Area (μm²)	158613		nucleous Strong Area (μm²)	116586		nucleous Strong Area (μm²)	210040		nucleous Strong Area (μm²)	152446		nucleous Strong Area (μm²)	204238		nucleous Strong Area (μm²)	63602.4		nucleous Strong Area (μm²)	175310
	cd31 Area (μm²)	4898.76		cd31 Area (μm²)	5895.62		cd31 Area (μm²)	15562.6		cd31 Area (μm²)	8146.89		cd31 Area (μm²)	11784.4		cd31 Area (μm²)	4632.09		cd31 Area (μm²)	1035.57		cd31 Area (μm²)	812.665
	cd31 Weak Area (μm²)	1933.24		cd31 Weak Area (μm²)	2608.78		cd31 Weak Area (μm²)	4696.86		cd31 Weak Area (μm²)	3457.87		cd31 Weak Area (μm²)	4292.04		cd31 Weak Area (μm²)	2224.96		cd31 Weak Area (μm²)	548.271		cd31 Weak Area (μm²)	473.886
	cd31 Moderate Area (μm²)	1571.44		cd31 Moderate Area (μm²)	1931.47		cd31 Moderate Area (μm²)	4495.97		cd31 Moderate Area (μm²)	2635.85		cd31 Moderate Area (μm²)	3641.81		cd31 Moderate Area (μm²)	1558.03		cd31 Moderate Area (μm²)	310.189		cd31 Moderate Area (μm²)	237.069
	cd31 Strong Area (μm²)	1394.08		cd31 Strong Area (μm²)	1355.37		cd31 Strong Area (μm²)	6369.75		cd31 Strong Area (μm²)	2053.17		cd31 Strong Area (μm²)	3850.54		cd31 Strong Area (μm²)	849.098		cd31 Strong Area (μm²)	177.106		cd31 Strong Area (μm²)	101.71
	% nucleous Positive Tissue	34.0271		% nucleous Positive Tissue	42.6567		% nucleous Positive Tissue	36.4312		% nucleous Positive Tissue	63.057		% nucleous Positive Tissue	49.9477		% nucleous Positive Tissue	52.4088		% nucleous Positive Tissue	36.3272		% nucleous Positive Tissue	53.8455
	% nucleous Positive Tissue (weak)	13.9165		% nucleous Positive Tissue (weak)	16.4372		% nucleous Positive Tissue (weak)	14.2944		% nucleous Positive Tissue (weak)	26.901		% nucleous Positive Tissue (weak)	20.0046		% nucleous Positive Tissue (weak)	19.0052		% nucleous Positive Tissue (weak)	14.0829		% nucleous Positive Tissue (weak)	21.1615
	% nucleous Positive Tissue (moderate)	8.1077		% nucleous Positive Tissue (moderate)	9.82392		% nucleous Positive Tissue (moderate)	8.91429		% nucleous Positive Tissue (moderate)	11.7241		% nucleous Positive Tissue (moderate)	9.86782		% nucleous Positive Tissue (moderate)	10.2011		% nucleous Positive Tissue (moderate)	8.11555		% nucleous Positive Tissue (moderate)	9.1016
	% nucleous Positive Tissue (strong)	12.0029		% nucleous Positive Tissue (strong)	16.3956		% nucleous Positive Tissue (strong)	13.2226		% nucleous Positive Tissue (strong)	24.4319		% nucleous Positive Tissue (strong)	20.0754		% nucleous Positive Tissue (strong)	23.2025		% nucleous Positive Tissue (strong)	14.1287		% nucleous Positive Tissue (strong)	23.5825
	% cd31 Positive Tissue	0.591603		% cd31 Positive Tissue	0.60942		% cd31 Positive Tissue	1.76502		% cd31 Positive Tissue	0.947646		% cd31 Positive Tissue	1.55187		% cd31 Positive Tissue	0.526229		% cd31 Positive Tissue	0.230042		% cd31 Positive Tissue	0.109318
	% cd31 Positive Tissue (weak)	0.23347		% cd31 Positive Tissue (weak)	0.269665		% cd31 Positive Tissue (weak)	0.532691		% cd31 Positive Tissue (weak)	0.40222		% cd31 Positive Tissue (weak)	0.565214		% cd31 Positive Tissue (weak)	0.252767		% cd31 Positive Tissue (weak)	0.121794		% cd31 Positive Tissue (weak)	0.063746
	% cd31 Positive Tissue (moderate)	0.189776		% cd31 Positive Tissue (moderate)	0.199653		% cd31 Positive Tissue (moderate)	0.509908		% cd31 Positive Tissue (moderate)	0.306602		% cd31 Positive Tissue (moderate)	0.479585		% cd31 Positive Tissue (moderate)	0.177		% cd31 Positive Tissue (moderate)	0.068906		% cd31 Positive Tissue (moderate)	0.03189
	% cd31 Positive Tissue (strong)	0.168357		% cd31 Positive Tissue (strong)	0.140102		% cd31 Positive Tissue (strong)	0.722422		% cd31 Positive Tissue (strong)	0.238824		% cd31 Positive Tissue (strong)	0.507073		% cd31 Positive Tissue (strong)	0.096462		% cd31 Positive Tissue (strong)	0.039343		% cd31 Positive Tissue (strong)	0.013682
	nucleous Average Positive Optical Density	0.324793		nucleous Average Positive Optical Density	0.338194		nucleous Average Positive Optical Density	0.327949		nucleous Average Positive Optical Density	0.351857		nucleous Average Positive Optical Density	0.356422		nucleous Average Positive Optical Density	0.376582		nucleous Average Positive Optical Density	0.342577		nucleous Average Positive Optical Density	0.375416
	cd31 Average Positive Optical Density	0.587183		cd31 Average Positive Optical Density	0.555673		cd31 Average Positive Optical Density	0.649529		cd31 Average Positive Optical Density	0.565927		cd31 Average Positive Optical Density	0.611451		cd31 Average Positive Optical Density	0.538302		cd31 Average Positive Optical Density	0.531613		cd31 Average Positive Optical Density	0.509333
	% Negative Tissue	65.4505		% Negative Tissue	56.8498		% Negative Tissue	62.2389		% Negative Tissue	36.3595		% Negative Tissue	48.9095		% Negative Tissue	47.1891		% Negative Tissue	63.487		% Negative Tissue	46.072
	tumour: Tissue Area Analyzed (μm²)	828049		tumour: Tissue Area Analyzed (μm²)	967414		tumour: Tissue Area Analyzed (μm²)	881722		tumour: Tissue Area Analyzed (μm²)	859698		tumour: Tissue Area Analyzed (μm²)	759367		tumour: Tissue Area Analyzed (μm²)	880243		tumour: Tissue Area Analyzed (μm²)	450163		tumour: Tissue Area Analyzed (μm²)	743393
	tumour: nucleous Area (μm²)	281761		tumour: nucleous Area (μm²)	412667		tumour: nucleous Area (μm²)	321222		tumour: nucleous Area (μm²)	542100		tumour: nucleous Area (μm²)	379286		tumour: nucleous Area (μm²)	461324		tumour: nucleous Area (μm²)	163532		tumour: nucleous Area (μm²)	400284
	tumour: nucleous Weak Area (μm²)	115235		tumour: nucleous Weak Area (μm²)	159016		tumour: nucleous Weak Area (μm²)	126037		tumour: nucleous Weak Area (μm²)	231267		tumour: nucleous Weak Area (μm²)	151908		tumour: nucleous Weak Area (μm²)	167292		tumour: nucleous Weak Area (μm²)	63396.2		tumour: nucleous Weak Area (μm²)	157313
	tumour: nucleous Moderate Area (μm²)	67135.7		tumour: nucleous Moderate Area (μm²)	95038		tumour: nucleous Moderate Area (μm²)	78599.3		tumour: nucleous Moderate Area (μm²)	100792		tumour: nucleous Moderate Area (μm²)	74932.9		tumour: nucleous Moderate Area (μm²)	89794.4		tumour: nucleous Moderate Area (μm²)	36533.2		tumour: nucleous Moderate Area (μm²)	67660.7
	tumour: nucleous Strong Area (μm²)	99389.8		tumour: nucleous Strong Area (μm²)	158613		tumour: nucleous Strong Area (μm²)	116586		tumour: nucleous Strong Area (μm²)	210040		tumour: nucleous Strong Area (μm²)	152446		tumour: nucleous Strong Area (μm²)	204238		tumour: nucleous Strong Area (μm²)	63602.4		tumour: nucleous Strong Area (μm²)	175310
	tumour: cd31 Area (μm²)	4898.76		tumour: cd31 Area (μm²)	5895.62		tumour: cd31 Area (μm²)	15562.6		tumour: cd31 Area (μm²)	8146.89		tumour: cd31 Area (μm²)	11784.4		tumour: cd31 Area (μm²)	4632.09		tumour: cd31 Area (μm²)	1035.57		tumour: cd31 Area (μm²)	812.665
	tumour: cd31 Weak Area (μm²)	1933.24		tumour: cd31 Weak Area (μm²)	2608.78		tumour: cd31 Weak Area (μm²)	4696.86		tumour: cd31 Weak Area (μm²)	3457.87		tumour: cd31 Weak Area (μm²)	4292.04		tumour: cd31 Weak Area (μm²)	2224.96		tumour: cd31 Weak Area (μm²)	548.271		tumour: cd31 Weak Area (μm²)	473.886
	tumour: cd31 Moderate Area (μm²)	1571.44		tumour: cd31 Moderate Area (μm²)	1931.47		tumour: cd31 Moderate Area (μm²)	4495.97		tumour: cd31 Moderate Area (μm²)	2635.85		tumour: cd31 Moderate Area (μm²)	3641.81		tumour: cd31 Moderate Area (μm²)	1558.03		tumour: cd31 Moderate Area (μm²)	310.189		tumour: cd31 Moderate Area (μm²)	237.069
	tumour: cd31 Strong Area (μm²)	1394.08		tumour: cd31 Strong Area (μm²)	1355.37		tumour: cd31 Strong Area (μm²)	6369.75		tumour: cd31 Strong Area (μm²)	2053.17		tumour: cd31 Strong Area (μm²)	3850.54		tumour: cd31 Strong Area (μm²)	849.098		tumour: cd31 Strong Area (μm²)	177.106		tumour: cd31 Strong Area (μm²)	101.71
	tumour: % nucleous Positive Tissue	34.0271		tumour: % nucleous Positive Tissue	42.6567		tumour: % nucleous Positive Tissue	36.4312		tumour: % nucleous Positive Tissue	63.057		tumour: % nucleous Positive Tissue	49.9477		tumour: % nucleous Positive Tissue	52.4088		tumour: % nucleous Positive Tissue	36.3272		tumour: % nucleous Positive Tissue	53.8455
	tumour: % nucleous Positive Tissue (weak)	13.9165		tumour: % nucleous Positive Tissue (weak)	16.4372		tumour: % nucleous Positive Tissue (weak)	14.2944		tumour: % nucleous Positive Tissue (weak)	26.901		tumour: % nucleous Positive Tissue (weak)	20.0046		tumour: % nucleous Positive Tissue (weak)	19.0052		tumour: % nucleous Positive Tissue (weak)	14.0829		tumour: % nucleous Positive Tissue (weak)	21.1615
	tumour: % nucleous Positive Tissue (moderate)	8.1077		tumour: % nucleous Positive Tissue (moderate)	9.82392		tumour: % nucleous Positive Tissue (moderate)	8.91429		tumour: % nucleous Positive Tissue (moderate)	11.7241		tumour: % nucleous Positive Tissue (moderate)	9.86782		tumour: % nucleous Positive Tissue (moderate)	10.2011		tumour: % nucleous Positive Tissue (moderate)	8.11555		tumour: % nucleous Positive Tissue (moderate)	9.1016
	tumour: % nucleous Positive Tissue (strong)	12.0029		tumour: % nucleous Positive Tissue (strong)	16.3956		tumour: % nucleous Positive Tissue (strong)	13.2226		tumour: % nucleous Positive Tissue (strong)	24.4319		tumour: % nucleous Positive Tissue (strong)	20.0754		tumour: % nucleous Positive Tissue (strong)	23.2025		tumour: % nucleous Positive Tissue (strong)	14.1287		tumour: % nucleous Positive Tissue (strong)	23.5825
	tumour: % cd31 Positive Tissue	0.591603		tumour: % cd31 Positive Tissue	0.60942		tumour: % cd31 Positive Tissue	1.76502		tumour: % cd31 Positive Tissue	0.947646		tumour: % cd31 Positive Tissue	1.55187		tumour: % cd31 Positive Tissue	0.526229		tumour: % cd31 Positive Tissue	0.230042		tumour: % cd31 Positive Tissue	0.109318		0.791394
	tumour: % cd31 Positive Tissue (weak)	0.23347		tumour: % cd31 Positive Tissue (weak)	0.269665		tumour: % cd31 Positive Tissue (weak)	0.532691		tumour: % cd31 Positive Tissue (weak)	0.40222		tumour: % cd31 Positive Tissue (weak)	0.565214		tumour: % cd31 Positive Tissue (weak)	0.252767		tumour: % cd31 Positive Tissue (weak)	0.121794		tumour: % cd31 Positive Tissue (weak)	0.063746
	tumour: % cd31 Positive Tissue (moderate)	0.189776		tumour: % cd31 Positive Tissue (moderate)	0.199653		tumour: % cd31 Positive Tissue (moderate)	0.509908		tumour: % cd31 Positive Tissue (moderate)	0.306602		tumour: % cd31 Positive Tissue (moderate)	0.479585		tumour: % cd31 Positive Tissue (moderate)	0.177		tumour: % cd31 Positive Tissue (moderate)	0.068906		tumour: % cd31 Positive Tissue (moderate)	0.03189
	tumour: % cd31 Positive Tissue (strong)	0.168357		tumour: % cd31 Positive Tissue (strong)	0.140102		tumour: % cd31 Positive Tissue (strong)	0.722422		tumour: % cd31 Positive Tissue (strong)	0.238824		tumour: % cd31 Positive Tissue (strong)	0.507073		tumour: % cd31 Positive Tissue (strong)	0.096462		tumour: % cd31 Positive Tissue (strong)	0.039343		tumour: % cd31 Positive Tissue (strong)	0.013682
	tumour: nucleous Average Positive Optical Density	0.324793		tumour: nucleous Average Positive Optical Density	0.338194		tumour: nucleous Average Positive Optical Density	0.327949		tumour: nucleous Average Positive Optical Density	0.351857		tumour: nucleous Average Positive Optical Density	0.356422		tumour: nucleous Average Positive Optical Density	0.376582		tumour: nucleous Average Positive Optical Density	0.342577		tumour: nucleous Average Positive Optical Density	0.375416
	tumour: cd31 Average Positive Optical Density	0.587183		tumour: cd31 Average Positive Optical Density	0.555673		tumour: cd31 Average Positive Optical Density	0.649529		tumour: cd31 Average Positive Optical Density	0.565927		tumour: cd31 Average Positive Optical Density	0.611451		tumour: cd31 Average Positive Optical Density	0.538302		tumour: cd31 Average Positive Optical Density	0.531613		tumour: cd31 Average Positive Optical Density	0.509333
	tumour: % Negative Tissue	65.4505		tumour: % Negative Tissue	56.8498		tumour: % Negative Tissue	62.2389		tumour: % Negative Tissue	36.3595		tumour: % Negative Tissue	48.9095		tumour: % Negative Tissue	47.1891		tumour: % Negative Tissue	63.487		tumour: % Negative Tissue	46.072
	BSNA8.1f	HOM
	Name	Value		Name	Value		Name	Value		Name	Value		Name	Value		Name	Value		Name	Value		Name	Value
	Classified Area (mm²)	0.56419		Classified Area (mm²)	0.7106		Classified Area (mm²)	0.73415		Classified Area (mm²)	0.72784		Classified Area (mm²)	0.72817		Classified Area (mm²)	0.89877		Classified Area (mm²)	0.63886		Classified Area (mm²)	0.85387
	tumour Area (mm²)	0.56419		tumour Area (mm²)	0.70807		tumour Area (mm²)	0.7262		tumour Area (mm²)	0.71557		tumour Area (mm²)	0.72619		tumour Area (mm²)	0.80947		tumour Area (mm²)	0.61395		tumour Area (mm²)	0.84589
	Necrosis Area (mm²)	0		Necrosis Area (mm²)	0		Necrosis Area (mm²)	0.00529		Necrosis Area (mm²)	0.00527		Necrosis Area (mm²)	0		Necrosis Area (mm²)	0.05139		Necrosis Area (mm²)	0.0232		Necrosis Area (mm²)	0.0069
	Empty Area (mm²)	0		Empty Area (mm²)	0.0025		Empty Area (mm²)	0.00266		Empty Area (mm²)	0.007		Empty Area (mm²)	0.00199		Empty Area (mm²)	0.03784		Empty Area (mm²)	0.00171		Empty Area (mm²)	0.00107
	Normal Area (mm²)	0		Normal Area (mm²)	3e-05		Normal Area (mm²)	0		Normal Area (mm²)	0		Normal Area (mm²)	0		Normal Area (mm²)	6e-05		Normal Area (mm²)	0		Normal Area (mm²)	0
	Tissue Area Analyzed (μm²)	562307		Tissue Area Analyzed (μm²)	665823		Tissue Area Analyzed (μm²)	643320		Tissue Area Analyzed (μm²)	686159		Tissue Area Analyzed (μm²)	694651		Tissue Area Analyzed (μm²)	681642		Tissue Area Analyzed (μm²)	511264		Tissue Area Analyzed (μm²)	750294
	nucleous Area (μm²)	226681		nucleous Area (μm²)	281426		nucleous Area (μm²)	335470		nucleous Area (μm²)	321113		nucleous Area (μm²)	334124		nucleous Area (μm²)	297709		nucleous Area (μm²)	179365		nucleous Area (μm²)	285904
	nucleous Weak Area (μm²)	84530.6		nucleous Weak Area (μm²)	101133		nucleous Weak Area (μm²)	107399		nucleous Weak Area (μm²)	110320		nucleous Weak Area (μm²)	109072		nucleous Weak Area (μm²)	97032		nucleous Weak Area (μm²)	66444.5		nucleous Weak Area (μm²)	109230
	nucleous Moderate Area (μm²)	47828.8		nucleous Moderate Area (μm²)	57781.7		nucleous Moderate Area (μm²)	67729		nucleous Moderate Area (μm²)	67133.9		nucleous Moderate Area (μm²)	68743.1		nucleous Moderate Area (μm²)	61537.4		nucleous Moderate Area (μm²)	38780		nucleous Moderate Area (μm²)	57616
	nucleous Strong Area (μm²)	94321.2		nucleous Strong Area (μm²)	122512		nucleous Strong Area (μm²)	160341		nucleous Strong Area (μm²)	143659		nucleous Strong Area (μm²)	156309		nucleous Strong Area (μm²)	139139		nucleous Strong Area (μm²)	74141		nucleous Strong Area (μm²)	119058
	cd31 Area (μm²)	3063.94		cd31 Area (μm²)	2683.41		cd31 Area (μm²)	4628.8		cd31 Area (μm²)	2090.36		cd31 Area (μm²)	2704.16		cd31 Area (μm²)	12475.4		cd31 Area (μm²)	679.329		cd31 Area (μm²)	1746.52
	cd31 Weak Area (μm²)	1497.05		cd31 Weak Area (μm²)	1481.62		cd31 Weak Area (μm²)	2059.24		cd31 Weak Area (μm²)	1142.08		cd31 Weak Area (μm²)	1419.13		cd31 Weak Area (μm²)	4394.77		cd31 Weak Area (μm²)	349.911		cd31 Weak Area (μm²)	995.337
	cd31 Moderate Area (μm²)	964.976		cd31 Moderate Area (μm²)	816.207		cd31 Moderate Area (μm²)	1457.58		cd31 Moderate Area (μm²)	663.896		cd31 Moderate Area (μm²)	863.267		cd31 Moderate Area (μm²)	3815.63		cd31 Moderate Area (μm²)	199.118		cd31 Moderate Area (μm²)	510.319
	cd31 Strong Area (μm²)	601.908		cd31 Strong Area (μm²)	385.586		cd31 Strong Area (μm²)	1111.97		cd31 Strong Area (μm²)	284.382		cd31 Strong Area (μm²)	421.766		cd31 Strong Area (μm²)	4264.97		cd31 Strong Area (μm²)	130.3		cd31 Strong Area (μm²)	240.865
	% nucleous Positive Tissue	40.3126		% nucleous Positive Tissue	42.2675		% nucleous Positive Tissue	52.1466		% nucleous Positive Tissue	46.7987		% nucleous Positive Tissue	48.0995		% nucleous Positive Tissue	43.6752		% nucleous Positive Tissue	35.0827		% nucleous Positive Tissue	38.1055
	% nucleous Positive Tissue (weak)	15.0328		% nucleous Positive Tissue (weak)	15.1892		% nucleous Positive Tissue (weak)	16.6945		% nucleous Positive Tissue (weak)	16.0779		% nucleous Positive Tissue (weak)	15.7017		% nucleous Positive Tissue (weak)	14.235		% nucleous Positive Tissue (weak)	12.9961		% nucleous Positive Tissue (weak)	14.5582
	% nucleous Positive Tissue (moderate)	8.50581		% nucleous Positive Tissue (moderate)	8.67824		% nucleous Positive Tissue (moderate)	10.528		% nucleous Positive Tissue (moderate)	9.78402		% nucleous Positive Tissue (moderate)	9.89606		% nucleous Positive Tissue (moderate)	9.02781		% nucleous Positive Tissue (moderate)	7.58512		% nucleous Positive Tissue (moderate)	7.67912
	% nucleous Positive Tissue (strong)	16.774		% nucleous Positive Tissue (strong)	18.4		% nucleous Positive Tissue (strong)	24.924		% nucleous Positive Tissue (strong)	20.9367		% nucleous Positive Tissue (strong)	22.5018		% nucleous Positive Tissue (strong)	20.4124		% nucleous Positive Tissue (strong)	14.5015		% nucleous Positive Tissue (strong)	15.8682
	% cd31 Positive Tissue	0.544887		% cd31 Positive Tissue	0.403022		% cd31 Positive Tissue	0.719517		% cd31 Positive Tissue	0.304647		% cd31 Positive Tissue	0.389283		% cd31 Positive Tissue	1.83019		% cd31 Positive Tissue	0.132873		% cd31 Positive Tissue	0.232778
	% cd31 Positive Tissue (weak)	0.266234		% cd31 Positive Tissue (weak)	0.222525		% cd31 Positive Tissue (weak)	0.320096		% cd31 Positive Tissue (weak)	0.166446		% cd31 Positive Tissue (weak)	0.204294		% cd31 Positive Tissue (weak)	0.644732		% cd31 Positive Tissue (weak)	0.06844		% cd31 Positive Tissue (weak)	0.13266
	% cd31 Positive Tissue (moderate)	0.17161		% cd31 Positive Tissue (moderate)	0.122586		% cd31 Positive Tissue (moderate)	0.226572		% cd31 Positive Tissue (moderate)	0.096755		% cd31 Positive Tissue (moderate)	0.124273		% cd31 Positive Tissue (moderate)	0.55977		% cd31 Positive Tissue (moderate)	0.038946		% cd31 Positive Tissue (moderate)	0.068016
	% cd31 Positive Tissue (strong)	0.107043		% cd31 Positive Tissue (strong)	0.057911		% cd31 Positive Tissue (strong)	0.172849		% cd31 Positive Tissue (strong)	0.041446		% cd31 Positive Tissue (strong)	0.060716		% cd31 Positive Tissue (strong)	0.625691		% cd31 Positive Tissue (strong)	0.025486		% cd31 Positive Tissue (strong)	0.032103
	nucleous Average Positive Optical Density	0.362525		nucleous Average Positive Optical Density	0.369481		nucleous Average Positive Optical Density	0.385512		nucleous Average Positive Optical Density	0.367626		nucleous Average Positive Optical Density	0.376471		nucleous Average Positive Optical Density	0.378696		nucleous Average Positive Optical Density	0.351871		nucleous Average Positive Optical Density	0.359399
	cd31 Average Positive Optical Density	0.546504		cd31 Average Positive Optical Density	0.516409		cd31 Average Positive Optical Density	0.560833		cd31 Average Positive Optical Density	0.517139		cd31 Average Positive Optical Density	0.523808		cd31 Average Positive Optical Density	0.610849		cd31 Average Positive Optical Density	0.540861		cd31 Average Positive Optical Density	0.522103
	% Negative Tissue	59.2655		% Negative Tissue	57.417		% Negative Tissue	47.2973		% Negative Tissue	52.9606		% Negative Tissue	51.5996		% Negative Tissue	54.8168		% Negative Tissue	64.8155		% Negative Tissue	61.7132
	tumour: Tissue Area Analyzed (μm²)	562307		tumour: Tissue Area Analyzed (μm²)	665823		tumour: Tissue Area Analyzed (μm²)	643320		tumour: Tissue Area Analyzed (μm²)	686159		tumour: Tissue Area Analyzed (μm²)	694651		tumour: Tissue Area Analyzed (μm²)	681642		tumour: Tissue Area Analyzed (μm²)	511264		tumour: Tissue Area Analyzed (μm²)	750294
	tumour: nucleous Area (μm²)	226681		tumour: nucleous Area (μm²)	281426		tumour: nucleous Area (μm²)	335470		tumour: nucleous Area (μm²)	321113		tumour: nucleous Area (μm²)	334124		tumour: nucleous Area (μm²)	297709		tumour: nucleous Area (μm²)	179365		tumour: nucleous Area (μm²)	285904
	tumour: nucleous Weak Area (μm²)	84530.6		tumour: nucleous Weak Area (μm²)	101133		tumour: nucleous Weak Area (μm²)	107399		tumour: nucleous Weak Area (μm²)	110320		tumour: nucleous Weak Area (μm²)	109072		tumour: nucleous Weak Area (μm²)	97032		tumour: nucleous Weak Area (μm²)	66444.5		tumour: nucleous Weak Area (μm²)	109230
	tumour: nucleous Moderate Area (μm²)	47828.8		tumour: nucleous Moderate Area (μm²)	57781.7		tumour: nucleous Moderate Area (μm²)	67729		tumour: nucleous Moderate Area (μm²)	67133.9		tumour: nucleous Moderate Area (μm²)	68743.1		tumour: nucleous Moderate Area (μm²)	61537.4		tumour: nucleous Moderate Area (μm²)	38780		tumour: nucleous Moderate Area (μm²)	57616
	tumour: nucleous Strong Area (μm²)	94321.2		tumour: nucleous Strong Area (μm²)	122512		tumour: nucleous Strong Area (μm²)	160341		tumour: nucleous Strong Area (μm²)	143659		tumour: nucleous Strong Area (μm²)	156309		tumour: nucleous Strong Area (μm²)	139139		tumour: nucleous Strong Area (μm²)	74141		tumour: nucleous Strong Area (μm²)	119058
	tumour: cd31 Area (μm²)	3063.94		tumour: cd31 Area (μm²)	2683.41		tumour: cd31 Area (μm²)	4628.8		tumour: cd31 Area (μm²)	2090.36		tumour: cd31 Area (μm²)	2704.16		tumour: cd31 Area (μm²)	12475.4		tumour: cd31 Area (μm²)	679.329		tumour: cd31 Area (μm²)	1746.52
	tumour: cd31 Weak Area (μm²)	1497.05		tumour: cd31 Weak Area (μm²)	1481.62		tumour: cd31 Weak Area (μm²)	2059.24		tumour: cd31 Weak Area (μm²)	1142.08		tumour: cd31 Weak Area (μm²)	1419.13		tumour: cd31 Weak Area (μm²)	4394.77		tumour: cd31 Weak Area (μm²)	349.911		tumour: cd31 Weak Area (μm²)	995.337
	tumour: cd31 Moderate Area (μm²)	964.976		tumour: cd31 Moderate Area (μm²)	816.207		tumour: cd31 Moderate Area (μm²)	1457.58		tumour: cd31 Moderate Area (μm²)	663.896		tumour: cd31 Moderate Area (μm²)	863.267		tumour: cd31 Moderate Area (μm²)	3815.63		tumour: cd31 Moderate Area (μm²)	199.118		tumour: cd31 Moderate Area (μm²)	510.319
	tumour: cd31 Strong Area (μm²)	601.908		tumour: cd31 Strong Area (μm²)	385.586		tumour: cd31 Strong Area (μm²)	1111.97		tumour: cd31 Strong Area (μm²)	284.382		tumour: cd31 Strong Area (μm²)	421.766		tumour: cd31 Strong Area (μm²)	4264.97		tumour: cd31 Strong Area (μm²)	130.3		tumour: cd31 Strong Area (μm²)	240.865
	tumour: % nucleous Positive Tissue	40.3126		tumour: % nucleous Positive Tissue	42.2675		tumour: % nucleous Positive Tissue	52.1466		tumour: % nucleous Positive Tissue	46.7987		tumour: % nucleous Positive Tissue	48.0995		tumour: % nucleous Positive Tissue	43.6752		tumour: % nucleous Positive Tissue	35.0827		tumour: % nucleous Positive Tissue	38.1055
	tumour: % nucleous Positive Tissue (weak)	15.0328		tumour: % nucleous Positive Tissue (weak)	15.1892		tumour: % nucleous Positive Tissue (weak)	16.6945		tumour: % nucleous Positive Tissue (weak)	16.0779		tumour: % nucleous Positive Tissue (weak)	15.7017		tumour: % nucleous Positive Tissue (weak)	14.235		tumour: % nucleous Positive Tissue (weak)	12.9961		tumour: % nucleous Positive Tissue (weak)	14.5582
	tumour: % nucleous Positive Tissue (moderate)	8.50581		tumour: % nucleous Positive Tissue (moderate)	8.67824		tumour: % nucleous Positive Tissue (moderate)	10.528		tumour: % nucleous Positive Tissue (moderate)	9.78402		tumour: % nucleous Positive Tissue (moderate)	9.89606		tumour: % nucleous Positive Tissue (moderate)	9.02781		tumour: % nucleous Positive Tissue (moderate)	7.58512		tumour: % nucleous Positive Tissue (moderate)	7.67912
	tumour: % nucleous Positive Tissue (strong)	16.774		tumour: % nucleous Positive Tissue (strong)	18.4		tumour: % nucleous Positive Tissue (strong)	24.924		tumour: % nucleous Positive Tissue (strong)	20.9367		tumour: % nucleous Positive Tissue (strong)	22.5018		tumour: % nucleous Positive Tissue (strong)	20.4124		tumour: % nucleous Positive Tissue (strong)	14.5015		tumour: % nucleous Positive Tissue (strong)	15.8682
	tumour: % cd31 Positive Tissue	0.544887		tumour: % cd31 Positive Tissue	0.403022		tumour: % cd31 Positive Tissue	0.719517		tumour: % cd31 Positive Tissue	0.304647		tumour: % cd31 Positive Tissue	0.389283		tumour: % cd31 Positive Tissue	1.83019		tumour: % cd31 Positive Tissue	0.132873		tumour: % cd31 Positive Tissue	0.232778		0.56965
	tumour: % cd31 Positive Tissue (weak)	0.266234		tumour: % cd31 Positive Tissue (weak)	0.222525		tumour: % cd31 Positive Tissue (weak)	0.320096		tumour: % cd31 Positive Tissue (weak)	0.166446		tumour: % cd31 Positive Tissue (weak)	0.204294		tumour: % cd31 Positive Tissue (weak)	0.644732		tumour: % cd31 Positive Tissue (weak)	0.06844		tumour: % cd31 Positive Tissue (weak)	0.13266
	tumour: % cd31 Positive Tissue (moderate)	0.17161		tumour: % cd31 Positive Tissue (moderate)	0.122586		tumour: % cd31 Positive Tissue (moderate)	0.226572		tumour: % cd31 Positive Tissue (moderate)	0.096755		tumour: % cd31 Positive Tissue (moderate)	0.124273		tumour: % cd31 Positive Tissue (moderate)	0.55977		tumour: % cd31 Positive Tissue (moderate)	0.038946		tumour: % cd31 Positive Tissue (moderate)	0.068016
	tumour: % cd31 Positive Tissue (strong)	0.107043		tumour: % cd31 Positive Tissue (strong)	0.057911		tumour: % cd31 Positive Tissue (strong)	0.172849		tumour: % cd31 Positive Tissue (strong)	0.041446		tumour: % cd31 Positive Tissue (strong)	0.060716		tumour: % cd31 Positive Tissue (strong)	0.625691		tumour: % cd31 Positive Tissue (strong)	0.025486		tumour: % cd31 Positive Tissue (strong)	0.032103
	tumour: nucleous Average Positive Optical Density	0.362525		tumour: nucleous Average Positive Optical Density	0.369481		tumour: nucleous Average Positive Optical Density	0.385512		tumour: nucleous Average Positive Optical Density	0.367626		tumour: nucleous Average Positive Optical Density	0.376471		tumour: nucleous Average Positive Optical Density	0.378696		tumour: nucleous Average Positive Optical Density	0.351871		tumour: nucleous Average Positive Optical Density	0.359399
	tumour: cd31 Average Positive Optical Density	0.546504		tumour: cd31 Average Positive Optical Density	0.516409		tumour: cd31 Average Positive Optical Density	0.560833		tumour: cd31 Average Positive Optical Density	0.517139		tumour: cd31 Average Positive Optical Density	0.523808		tumour: cd31 Average Positive Optical Density	0.610849		tumour: cd31 Average Positive Optical Density	0.540861		tumour: cd31 Average Positive Optical Density	0.522103
	tumour: % Negative Tissue	59.2655		tumour: % Negative Tissue	57.417		tumour: % Negative Tissue	47.2973		tumour: % Negative Tissue	52.9606		tumour: % Negative Tissue	51.5996		tumour: % Negative Tissue	54.8168		tumour: % Negative Tissue	64.8155		tumour: % Negative Tissue	61.7132
	BSNA11.1f	HOM
	Name	Value		Name	Value		Name	Value		Name	Value		Name	Value		Name	Value		Name	Value		Name	Value
	Classified Area (mm²)	0.66091		Classified Area (mm²)	1.01307		Classified Area (mm²)	0.82444		Classified Area (mm²)	0.74439		Classified Area (mm²)	0.64101		Classified Area (mm²)	0.68429		Classified Area (mm²)	0.89911		Classified Area (mm²)	0.95228
	tumour Area (mm²)	0.66073		tumour Area (mm²)	1.01234		tumour Area (mm²)	0.82269		tumour Area (mm²)	0.74224		tumour Area (mm²)	0.63611		tumour Area (mm²)	0.60554		tumour Area (mm²)	0.89911		tumour Area (mm²)	0.95176
	Necrosis Area (mm²)	0		Necrosis Area (mm²)	0		Necrosis Area (mm²)	0		Necrosis Area (mm²)	0		Necrosis Area (mm²)	0		Necrosis Area (mm²)	0.00069		Necrosis Area (mm²)	0		Necrosis Area (mm²)	0
	Empty Area (mm²)	0.0001		Empty Area (mm²)	0		Empty Area (mm²)	0.00152		Empty Area (mm²)	0.00205		Empty Area (mm²)	0.00386		Empty Area (mm²)	0.07747		Empty Area (mm²)	0		Empty Area (mm²)	0
	Normal Area (mm²)	8e-05		Normal Area (mm²)	0.00074		Normal Area (mm²)	0.00022		Normal Area (mm²)	0.0001		Normal Area (mm²)	0.00104		Normal Area (mm²)	0.00059		Normal Area (mm²)	0		Normal Area (mm²)	0.00051
	Tissue Area Analyzed (μm²)	654480		Tissue Area Analyzed (μm²)	1.00976e+06		Tissue Area Analyzed (μm²)	814102		Tissue Area Analyzed (μm²)	729979		Tissue Area Analyzed (μm²)	616628		Tissue Area Analyzed (μm²)	573017		Tissue Area Analyzed (μm²)	897951		Tissue Area Analyzed (μm²)	949110
	nucleous Area (μm²)	435821		nucleous Area (μm²)	701938		nucleous Area (μm²)	493588		nucleous Area (μm²)	391449		nucleous Area (μm²)	354863		nucleous Area (μm²)	350798		nucleous Area (μm²)	539319		nucleous Area (μm²)	786241
	nucleous Weak Area (μm²)	134034		nucleous Weak Area (μm²)	221878		nucleous Weak Area (μm²)	166601		nucleous Weak Area (μm²)	136088		nucleous Weak Area (μm²)	118782		nucleous Weak Area (μm²)	109910		nucleous Weak Area (μm²)	181519		nucleous Weak Area (μm²)	212771
	nucleous Moderate Area (μm²)	84694		nucleous Moderate Area (μm²)	138342		nucleous Moderate Area (μm²)	98538.9		nucleous Moderate Area (μm²)	79850.9		nucleous Moderate Area (μm²)	71675.7		nucleous Moderate Area (μm²)	68659.8		nucleous Moderate Area (μm²)	110459		nucleous Moderate Area (μm²)	152717
	nucleous Strong Area (μm²)	217093		nucleous Strong Area (μm²)	341718		nucleous Strong Area (μm²)	228449		nucleous Strong Area (μm²)	175510		nucleous Strong Area (μm²)	164405		nucleous Strong Area (μm²)	172229		nucleous Strong Area (μm²)	247341		nucleous Strong Area (μm²)	420753
	cd31 Area (μm²)	11070.2		cd31 Area (μm²)	15174.2		cd31 Area (μm²)	6934.47		cd31 Area (μm²)	6027.69		cd31 Area (μm²)	4274.08		cd31 Area (μm²)	9338.06		cd31 Area (μm²)	3473.31		cd31 Area (μm²)	6278.42
	cd31 Weak Area (μm²)	4923.81		cd31 Weak Area (μm²)	6057.04		cd31 Weak Area (μm²)	3248.38		cd31 Weak Area (μm²)	2687.97		cd31 Weak Area (μm²)	2016.73		cd31 Weak Area (μm²)	3163.12		cd31 Weak Area (μm²)	1614.96		cd31 Weak Area (μm²)	2991.58
	cd31 Moderate Area (μm²)	3590.96		cd31 Moderate Area (μm²)	4966.06		cd31 Moderate Area (μm²)	2286.95		cd31 Moderate Area (μm²)	1982.83		cd31 Moderate Area (μm²)	1359.92		cd31 Moderate Area (μm²)	2953.12		cd31 Moderate Area (μm²)	1148.91		cd31 Moderate Area (μm²)	2060.25
	cd31 Strong Area (μm²)	2555.39		cd31 Strong Area (μm²)	4151.12		cd31 Strong Area (μm²)	1399.14		cd31 Strong Area (μm²)	1356.89		cd31 Strong Area (μm²)	897.423		cd31 Strong Area (μm²)	3221.82		cd31 Strong Area (μm²)	709.437		cd31 Strong Area (μm²)	1226.59
	% nucleous Positive Tissue	66.5904		% nucleous Positive Tissue	69.5155		% nucleous Positive Tissue	60.6297		% nucleous Positive Tissue	53.6248		% nucleous Positive Tissue	57.549		% nucleous Positive Tissue	61.2194		% nucleous Positive Tissue	60.0611		% nucleous Positive Tissue	82.8398
	% nucleous Positive Tissue (weak)	20.4795		% nucleous Positive Tissue (weak)	21.9733		% nucleous Positive Tissue (weak)	20.4643		% nucleous Positive Tissue (weak)	18.6428		% nucleous Positive Tissue (weak)	19.2632		% nucleous Positive Tissue (weak)	19.1809		% nucleous Positive Tissue (weak)	20.2148		% nucleous Positive Tissue (weak)	22.4179
	% nucleous Positive Tissue (moderate)	12.9407		% nucleous Positive Tissue (moderate)	13.7005		% nucleous Positive Tissue (moderate)	12.104		% nucleous Positive Tissue (moderate)	10.9388		% nucleous Positive Tissue (moderate)	11.6238		% nucleous Positive Tissue (moderate)	11.9822		% nucleous Positive Tissue (moderate)	12.3013		% nucleous Positive Tissue (moderate)	16.0905
	% nucleous Positive Tissue (strong)	33.1703		% nucleous Positive Tissue (strong)	33.8416		% nucleous Positive Tissue (strong)	28.0614		% nucleous Positive Tissue (strong)	24.0432		% nucleous Positive Tissue (strong)	26.6619		% nucleous Positive Tissue (strong)	30.0564		% nucleous Positive Tissue (strong)	27.545		% nucleous Positive Tissue (strong)	44.3314
	% cd31 Positive Tissue	1.69144		% cd31 Positive Tissue	1.50276		% cd31 Positive Tissue	0.851793		% cd31 Positive Tissue	0.825734		% cd31 Positive Tissue	0.693138		% cd31 Positive Tissue	1.62963		% cd31 Positive Tissue	0.386804		% cd31 Positive Tissue	0.661506
	% cd31 Positive Tissue (weak)	0.752324		% cd31 Positive Tissue (weak)	0.599851		% cd31 Positive Tissue (weak)	0.399014		% cd31 Positive Tissue (weak)	0.368225		% cd31 Positive Tissue (weak)	0.327059		% cd31 Positive Tissue (weak)	0.552011		% cd31 Positive Tissue (weak)	0.179849		% cd31 Positive Tissue (weak)	0.315198
	% cd31 Positive Tissue (moderate)	0.548673		% cd31 Positive Tissue (moderate)	0.491807		% cd31 Positive Tissue (moderate)	0.280917		% cd31 Positive Tissue (moderate)	0.271629		% cd31 Positive Tissue (moderate)	0.220542		% cd31 Positive Tissue (moderate)	0.515363		% cd31 Positive Tissue (moderate)	0.127948		% cd31 Positive Tissue (moderate)	0.217072
	% cd31 Positive Tissue (strong)	0.390446		% cd31 Positive Tissue (strong)	0.411101		% cd31 Positive Tissue (strong)	0.171863		% cd31 Positive Tissue (strong)	0.18588		% cd31 Positive Tissue (strong)	0.145537		% cd31 Positive Tissue (strong)	0.562255		% cd31 Positive Tissue (strong)	0.079006		% cd31 Positive Tissue (strong)	0.129236
	nucleous Average Positive Optical Density	0.419763		nucleous Average Positive Optical Density	0.412264		nucleous Average Positive Optical Density	0.394119		nucleous Average Positive Optical Density	0.378944		nucleous Average Positive Optical Density	0.383962		nucleous Average Positive Optical Density	0.399465		nucleous Average Positive Optical Density	0.383586		nucleous Average Positive Optical Density	0.439549
	cd31 Average Positive Optical Density	0.559788		cd31 Average Positive Optical Density	0.579767		cd31 Average Positive Optical Density	0.549259		cd31 Average Positive Optical Density	0.555692		cd31 Average Positive Optical Density	0.54816		cd31 Average Positive Optical Density	0.612388		cd31 Average Positive Optical Density	0.54821		cd31 Average Positive Optical Density	0.540829
	% Negative Tissue	32.3572		% Negative Tissue	29.5032		% Negative Tissue	38.7412		% Negative Tissue	45.7298		% Negative Tissue	41.9787		% Negative Tissue	37.6667		% Negative Tissue	39.6585		% Negative Tissue	16.7624
	tumour: Tissue Area Analyzed (μm²)	654480		tumour: Tissue Area Analyzed (μm²)	1.00976e+06		tumour: Tissue Area Analyzed (μm²)	814102		tumour: Tissue Area Analyzed (μm²)	729979		tumour: Tissue Area Analyzed (μm²)	616628		tumour: Tissue Area Analyzed (μm²)	573017		tumour: Tissue Area Analyzed (μm²)	897951		tumour: Tissue Area Analyzed (μm²)	949110
	tumour: nucleous Area (μm²)	435821		tumour: nucleous Area (μm²)	701938		tumour: nucleous Area (μm²)	493588		tumour: nucleous Area (μm²)	391449		tumour: nucleous Area (μm²)	354863		tumour: nucleous Area (μm²)	350798		tumour: nucleous Area (μm²)	539319		tumour: nucleous Area (μm²)	786241
	tumour: nucleous Weak Area (μm²)	134034		tumour: nucleous Weak Area (μm²)	221878		tumour: nucleous Weak Area (μm²)	166601		tumour: nucleous Weak Area (μm²)	136088		tumour: nucleous Weak Area (μm²)	118782		tumour: nucleous Weak Area (μm²)	109910		tumour: nucleous Weak Area (μm²)	181519		tumour: nucleous Weak Area (μm²)	212771
	tumour: nucleous Moderate Area (μm²)	84694		tumour: nucleous Moderate Area (μm²)	138342		tumour: nucleous Moderate Area (μm²)	98538.9		tumour: nucleous Moderate Area (μm²)	79850.9		tumour: nucleous Moderate Area (μm²)	71675.7		tumour: nucleous Moderate Area (μm²)	68659.8		tumour: nucleous Moderate Area (μm²)	110459		tumour: nucleous Moderate Area (μm²)	152717
	tumour: nucleous Strong Area (μm²)	217093		tumour: nucleous Strong Area (μm²)	341718		tumour: nucleous Strong Area (μm²)	228449		tumour: nucleous Strong Area (μm²)	175510		tumour: nucleous Strong Area (μm²)	164405		tumour: nucleous Strong Area (μm²)	172229		tumour: nucleous Strong Area (μm²)	247341		tumour: nucleous Strong Area (μm²)	420753
	tumour: cd31 Area (μm²)	11070.2		tumour: cd31 Area (μm²)	15174.2		tumour: cd31 Area (μm²)	6934.47		tumour: cd31 Area (μm²)	6027.69		tumour: cd31 Area (μm²)	4274.08		tumour: cd31 Area (μm²)	9338.06		tumour: cd31 Area (μm²)	3473.31		tumour: cd31 Area (μm²)	6278.42
	tumour: cd31 Weak Area (μm²)	4923.81		tumour: cd31 Weak Area (μm²)	6057.04		tumour: cd31 Weak Area (μm²)	3248.38		tumour: cd31 Weak Area (μm²)	2687.97		tumour: cd31 Weak Area (μm²)	2016.73		tumour: cd31 Weak Area (μm²)	3163.12		tumour: cd31 Weak Area (μm²)	1614.96		tumour: cd31 Weak Area (μm²)	2991.58
	tumour: cd31 Moderate Area (μm²)	3590.96		tumour: cd31 Moderate Area (μm²)	4966.06		tumour: cd31 Moderate Area (μm²)	2286.95		tumour: cd31 Moderate Area (μm²)	1982.83		tumour: cd31 Moderate Area (μm²)	1359.92		tumour: cd31 Moderate Area (μm²)	2953.12		tumour: cd31 Moderate Area (μm²)	1148.91		tumour: cd31 Moderate Area (μm²)	2060.25
	tumour: cd31 Strong Area (μm²)	2555.39		tumour: cd31 Strong Area (μm²)	4151.12		tumour: cd31 Strong Area (μm²)	1399.14		tumour: cd31 Strong Area (μm²)	1356.89		tumour: cd31 Strong Area (μm²)	897.423		tumour: cd31 Strong Area (μm²)	3221.82		tumour: cd31 Strong Area (μm²)	709.437		tumour: cd31 Strong Area (μm²)	1226.59
	tumour: % nucleous Positive Tissue	66.5904		tumour: % nucleous Positive Tissue	69.5155		tumour: % nucleous Positive Tissue	60.6297		tumour: % nucleous Positive Tissue	53.6248		tumour: % nucleous Positive Tissue	57.549		tumour: % nucleous Positive Tissue	61.2194		tumour: % nucleous Positive Tissue	60.0611		tumour: % nucleous Positive Tissue	82.8398
	tumour: % nucleous Positive Tissue (weak)	20.4795		tumour: % nucleous Positive Tissue (weak)	21.9733		tumour: % nucleous Positive Tissue (weak)	20.4643		tumour: % nucleous Positive Tissue (weak)	18.6428		tumour: % nucleous Positive Tissue (weak)	19.2632		tumour: % nucleous Positive Tissue (weak)	19.1809		tumour: % nucleous Positive Tissue (weak)	20.2148		tumour: % nucleous Positive Tissue (weak)	22.4179
	tumour: % nucleous Positive Tissue (moderate)	12.9407		tumour: % nucleous Positive Tissue (moderate)	13.7005		tumour: % nucleous Positive Tissue (moderate)	12.104		tumour: % nucleous Positive Tissue (moderate)	10.9388		tumour: % nucleous Positive Tissue (moderate)	11.6238		tumour: % nucleous Positive Tissue (moderate)	11.9822		tumour: % nucleous Positive Tissue (moderate)	12.3013		tumour: % nucleous Positive Tissue (moderate)	16.0905
	tumour: % nucleous Positive Tissue (strong)	33.1703		tumour: % nucleous Positive Tissue (strong)	33.8416		tumour: % nucleous Positive Tissue (strong)	28.0614		tumour: % nucleous Positive Tissue (strong)	24.0432		tumour: % nucleous Positive Tissue (strong)	26.6619		tumour: % nucleous Positive Tissue (strong)	30.0564		tumour: % nucleous Positive Tissue (strong)	27.545		tumour: % nucleous Positive Tissue (strong)	44.3314
	tumour: % cd31 Positive Tissue	1.69144		tumour: % cd31 Positive Tissue	1.50276		tumour: % cd31 Positive Tissue	0.851793		tumour: % cd31 Positive Tissue	0.825734		tumour: % cd31 Positive Tissue	0.693138		tumour: % cd31 Positive Tissue	1.62963		tumour: % cd31 Positive Tissue	0.386804		tumour: % cd31 Positive Tissue	0.661506		1.03035
	tumour: % cd31 Positive Tissue (weak)	0.752324		tumour: % cd31 Positive Tissue (weak)	0.599851		tumour: % cd31 Positive Tissue (weak)	0.399014		tumour: % cd31 Positive Tissue (weak)	0.368225		tumour: % cd31 Positive Tissue (weak)	0.327059		tumour: % cd31 Positive Tissue (weak)	0.552011		tumour: % cd31 Positive Tissue (weak)	0.179849		tumour: % cd31 Positive Tissue (weak)	0.315198
	tumour: % cd31 Positive Tissue (moderate)	0.548673		tumour: % cd31 Positive Tissue (moderate)	0.491807		tumour: % cd31 Positive Tissue (moderate)	0.280917		tumour: % cd31 Positive Tissue (moderate)	0.271629		tumour: % cd31 Positive Tissue (moderate)	0.220542		tumour: % cd31 Positive Tissue (moderate)	0.515363		tumour: % cd31 Positive Tissue (moderate)	0.127948		tumour: % cd31 Positive Tissue (moderate)	0.217072
	tumour: % cd31 Positive Tissue (strong)	0.390446		tumour: % cd31 Positive Tissue (strong)	0.411101		tumour: % cd31 Positive Tissue (strong)	0.171863		tumour: % cd31 Positive Tissue (strong)	0.18588		tumour: % cd31 Positive Tissue (strong)	0.145537		tumour: % cd31 Positive Tissue (strong)	0.562255		tumour: % cd31 Positive Tissue (strong)	0.079006		tumour: % cd31 Positive Tissue (strong)	0.129236
	tumour: nucleous Average Positive Optical Density	0.419763		tumour: nucleous Average Positive Optical Density	0.412264		tumour: nucleous Average Positive Optical Density	0.394119		tumour: nucleous Average Positive Optical Density	0.378944		tumour: nucleous Average Positive Optical Density	0.383962		tumour: nucleous Average Positive Optical Density	0.399465		tumour: nucleous Average Positive Optical Density	0.383586		tumour: nucleous Average Positive Optical Density	0.439549
	tumour: cd31 Average Positive Optical Density	0.559788		tumour: cd31 Average Positive Optical Density	0.579767		tumour: cd31 Average Positive Optical Density	0.549259		tumour: cd31 Average Positive Optical Density	0.555692		tumour: cd31 Average Positive Optical Density	0.54816		tumour: cd31 Average Positive Optical Density	0.612388		tumour: cd31 Average Positive Optical Density	0.54821		tumour: cd31 Average Positive Optical Density	0.540829
	tumour: % Negative Tissue	32.3572		tumour: % Negative Tissue	29.5032		tumour: % Negative Tissue	38.7412		tumour: % Negative Tissue	45.7298		tumour: % Negative Tissue	41.9787		tumour: % Negative Tissue	37.6667		tumour: % Negative Tissue	39.6585		tumour: % Negative Tissue	16.7624
	BSNA13.1b	HOM
	Name	Value		Name	Value		Name	Value		Name	Value		Name	Value		Name	Value		Name	Value		Name	Value
	Classified Area (mm²)	0.58649		Classified Area (mm²)	0.63532		Classified Area (mm²)	0.46418		Classified Area (mm²)	0.46444		Classified Area (mm²)	0.49521		Classified Area (mm²)	0.45236		Classified Area (mm²)	0.68269		Classified Area (mm²)	0.58436
	tumour Area (mm²)	0.58649		tumour Area (mm²)	0.6255		tumour Area (mm²)	0.42805		tumour Area (mm²)	0.46444		tumour Area (mm²)	0.49521		tumour Area (mm²)	0.45236		tumour Area (mm²)	0.67963		tumour Area (mm²)	0.58318
	Necrosis Area (mm²)	0		Necrosis Area (mm²)	0.00091		Necrosis Area (mm²)	0.01423		Necrosis Area (mm²)	0		Necrosis Area (mm²)	0		Necrosis Area (mm²)	0		Necrosis Area (mm²)	0		Necrosis Area (mm²)	0
	Empty Area (mm²)	0		Empty Area (mm²)	0.00404		Empty Area (mm²)	0.01977		Empty Area (mm²)	0		Empty Area (mm²)	0		Empty Area (mm²)	0		Empty Area (mm²)	0.00301		Empty Area (mm²)	0.00111
	Normal Area (mm²)	0		Normal Area (mm²)	0.00487		Normal Area (mm²)	0.00213		Normal Area (mm²)	0		Normal Area (mm²)	0		Normal Area (mm²)	0		Normal Area (mm²)	5e-05		Normal Area (mm²)	8e-05
	Tissue Area Analyzed (μm²)	584870		Tissue Area Analyzed (μm²)	609175		Tissue Area Analyzed (μm²)	387308		Tissue Area Analyzed (μm²)	463310		Tissue Area Analyzed (μm²)	494138		Tissue Area Analyzed (μm²)	450443		Tissue Area Analyzed (μm²)	677405		Tissue Area Analyzed (μm²)	573421
	nucleous Area (μm²)	471722		nucleous Area (μm²)	449421		nucleous Area (μm²)	190644		nucleous Area (μm²)	237596		nucleous Area (μm²)	312535		nucleous Area (μm²)	311930		nucleous Area (μm²)	448191		nucleous Area (μm²)	399645
	nucleous Weak Area (μm²)	90100.3		nucleous Weak Area (μm²)	119727		nucleous Weak Area (μm²)	63674		nucleous Weak Area (μm²)	81757.1		nucleous Weak Area (μm²)	89044		nucleous Weak Area (μm²)	82053.4		nucleous Weak Area (μm²)	131419		nucleous Weak Area (μm²)	93183.5
	nucleous Moderate Area (μm²)	78652.4		nucleous Moderate Area (μm²)	76934.5		nucleous Moderate Area (μm²)	40864		nucleous Moderate Area (μm²)	53011.2		nucleous Moderate Area (μm²)	69723.5		nucleous Moderate Area (μm²)	66616.3		nucleous Moderate Area (μm²)	94029.3		nucleous Moderate Area (μm²)	76760.4
	nucleous Strong Area (μm²)	302970		nucleous Strong Area (μm²)	252760		nucleous Strong Area (μm²)	86106		nucleous Strong Area (μm²)	102828		nucleous Strong Area (μm²)	153768		nucleous Strong Area (μm²)	163261		nucleous Strong Area (μm²)	222743		nucleous Strong Area (μm²)	229702
	cd31 Area (μm²)	1251.89		cd31 Area (μm²)	2761.85		cd31 Area (μm²)	4679.4		cd31 Area (μm²)	3498.86		cd31 Area (μm²)	4856		cd31 Area (μm²)	4335.56		cd31 Area (μm²)	3694.69		cd31 Area (μm²)	3571.98
	cd31 Weak Area (μm²)	632.016		cd31 Weak Area (μm²)	1301.48		cd31 Weak Area (μm²)	1622.04		cd31 Weak Area (μm²)	1572.7		cd31 Weak Area (μm²)	1607.62		cd31 Weak Area (μm²)	1638.99		cd31 Weak Area (μm²)	1549.68		cd31 Weak Area (μm²)	1374.85
	cd31 Moderate Area (μm²)	371.923		cd31 Moderate Area (μm²)	854.917		cd31 Moderate Area (μm²)	1388.01		cd31 Moderate Area (μm²)	1157.52		cd31 Moderate Area (μm²)	1301.23		cd31 Moderate Area (μm²)	1440.38		cd31 Moderate Area (μm²)	1194.46		cd31 Moderate Area (μm²)	1065.67
	cd31 Strong Area (μm²)	247.949		cd31 Strong Area (μm²)	605.451		cd31 Strong Area (μm²)	1669.35		cd31 Strong Area (μm²)	768.641		cd31 Strong Area (μm²)	1947.16		cd31 Strong Area (μm²)	1256.19		cd31 Strong Area (μm²)	950.555		cd31 Strong Area (μm²)	1131.46
	% nucleous Positive Tissue	80.6542		% nucleous Positive Tissue	73.7754		% nucleous Positive Tissue	49.2228		% nucleous Positive Tissue	51.2823		% nucleous Positive Tissue	63.2486		% nucleous Positive Tissue	69.2496		% nucleous Positive Tissue	66.1629		% nucleous Positive Tissue	69.6949
	% nucleous Positive Tissue (weak)	15.4052		% nucleous Positive Tissue (weak)	19.654		% nucleous Positive Tissue (weak)	16.4401		% nucleous Positive Tissue (weak)	17.6463		% nucleous Positive Tissue (weak)	18.0201		% nucleous Positive Tissue (weak)	18.2161		% nucleous Positive Tissue (weak)	19.4004		% nucleous Positive Tissue (weak)	16.2504
	% nucleous Positive Tissue (moderate)	13.4478		% nucleous Positive Tissue (moderate)	12.6293		% nucleous Positive Tissue (moderate)	10.5508		% nucleous Positive Tissue (moderate)	11.4418		% nucleous Positive Tissue (moderate)	14.1101		% nucleous Positive Tissue (moderate)	14.789		% nucleous Positive Tissue (moderate)	13.8808		% nucleous Positive Tissue (moderate)	13.3864
	% nucleous Positive Tissue (strong)	51.8012		% nucleous Positive Tissue (strong)	41.4921		% nucleous Positive Tissue (strong)	22.2319		% nucleous Positive Tissue (strong)	22.1941		% nucleous Positive Tissue (strong)	31.1184		% nucleous Positive Tissue (strong)	36.2444		% nucleous Positive Tissue (strong)	32.8817		% nucleous Positive Tissue (strong)	40.0581
	% cd31 Positive Tissue	0.214046		% cd31 Positive Tissue	0.453375		% cd31 Positive Tissue	1.20819		% cd31 Positive Tissue	0.755188		% cd31 Positive Tissue	0.982721		% cd31 Positive Tissue	0.96251		% cd31 Positive Tissue	0.545418		% cd31 Positive Tissue	0.622924
	% cd31 Positive Tissue (weak)	0.108061		% cd31 Positive Tissue (weak)	0.213646		% cd31 Positive Tissue (weak)	0.418798		% cd31 Positive Tissue (weak)	0.33945		% cd31 Positive Tissue (weak)	0.325338		% cd31 Positive Tissue (weak)	0.363862		% cd31 Positive Tissue (weak)	0.228767		% cd31 Positive Tissue (weak)	0.239763
	% cd31 Positive Tissue (moderate)	0.063591		% cd31 Positive Tissue (moderate)	0.14034		% cd31 Positive Tissue (moderate)	0.358373		% cd31 Positive Tissue (moderate)	0.249836		% cd31 Positive Tissue (moderate)	0.263332		% cd31 Positive Tissue (moderate)	0.319769		% cd31 Positive Tissue (moderate)	0.176328		% cd31 Positive Tissue (moderate)	0.185845
	% cd31 Positive Tissue (strong)	0.042394		% cd31 Positive Tissue (strong)	0.099389		% cd31 Positive Tissue (strong)	0.431014		% cd31 Positive Tissue (strong)	0.165902		% cd31 Positive Tissue (strong)	0.394051		% cd31 Positive Tissue (strong)	0.278879		% cd31 Positive Tissue (strong)	0.140323		% cd31 Positive Tissue (strong)	0.197317
	nucleous Average Positive Optical Density	0.517651		nucleous Average Positive Optical Density	0.482429		nucleous Average Positive Optical Density	0.391114		nucleous Average Positive Optical Density	0.365118		nucleous Average Positive Optical Density	0.39724		nucleous Average Positive Optical Density	0.419023		nucleous Average Positive Optical Density	0.411102		nucleous Average Positive Optical Density	0.476256
	cd31 Average Positive Optical Density	0.547303		cd31 Average Positive Optical Density	0.553492		cd31 Average Positive Optical Density	0.6352		cd31 Average Positive Optical Density	0.552352		cd31 Average Positive Optical Density	0.658041		cd31 Average Positive Optical Density	0.585443		cd31 Average Positive Optical Density	0.57018		cd31 Average Positive Optical Density	0.61171
	% Negative Tissue	19.2275		% Negative Tissue	25.9762		% Negative Tissue	49.8284		% Negative Tissue	48.161		% Negative Tissue	36.0689		% Negative Tissue	30.1265		% Negative Tissue	33.5046		% Negative Tissue	29.9167
	tumour: Tissue Area Analyzed (μm²)	584870		tumour: Tissue Area Analyzed (μm²)	609175		tumour: Tissue Area Analyzed (μm²)	387308		tumour: Tissue Area Analyzed (μm²)	463310		tumour: Tissue Area Analyzed (μm²)	494138		tumour: Tissue Area Analyzed (μm²)	450443		tumour: Tissue Area Analyzed (μm²)	677405		tumour: Tissue Area Analyzed (μm²)	573421
	tumour: nucleous Area (μm²)	471722		tumour: nucleous Area (μm²)	449421		tumour: nucleous Area (μm²)	190644		tumour: nucleous Area (μm²)	237596		tumour: nucleous Area (μm²)	312535		tumour: nucleous Area (μm²)	311930		tumour: nucleous Area (μm²)	448191		tumour: nucleous Area (μm²)	399645
	tumour: nucleous Weak Area (μm²)	90100.3		tumour: nucleous Weak Area (μm²)	119727		tumour: nucleous Weak Area (μm²)	63674		tumour: nucleous Weak Area (μm²)	81757.1		tumour: nucleous Weak Area (μm²)	89044		tumour: nucleous Weak Area (μm²)	82053.4		tumour: nucleous Weak Area (μm²)	131419		tumour: nucleous Weak Area (μm²)	93183.5
	tumour: nucleous Moderate Area (μm²)	78652.4		tumour: nucleous Moderate Area (μm²)	76934.5		tumour: nucleous Moderate Area (μm²)	40864		tumour: nucleous Moderate Area (μm²)	53011.2		tumour: nucleous Moderate Area (μm²)	69723.5		tumour: nucleous Moderate Area (μm²)	66616.3		tumour: nucleous Moderate Area (μm²)	94029.3		tumour: nucleous Moderate Area (μm²)	76760.4
	tumour: nucleous Strong Area (μm²)	302970		tumour: nucleous Strong Area (μm²)	252760		tumour: nucleous Strong Area (μm²)	86106		tumour: nucleous Strong Area (μm²)	102828		tumour: nucleous Strong Area (μm²)	153768		tumour: nucleous Strong Area (μm²)	163261		tumour: nucleous Strong Area (μm²)	222743		tumour: nucleous Strong Area (μm²)	229702
	tumour: cd31 Area (μm²)	1251.89		tumour: cd31 Area (μm²)	2761.85		tumour: cd31 Area (μm²)	4679.4		tumour: cd31 Area (μm²)	3498.86		tumour: cd31 Area (μm²)	4856		tumour: cd31 Area (μm²)	4335.56		tumour: cd31 Area (μm²)	3694.69		tumour: cd31 Area (μm²)	3571.98
	tumour: cd31 Weak Area (μm²)	632.016		tumour: cd31 Weak Area (μm²)	1301.48		tumour: cd31 Weak Area (μm²)	1622.04		tumour: cd31 Weak Area (μm²)	1572.7		tumour: cd31 Weak Area (μm²)	1607.62		tumour: cd31 Weak Area (μm²)	1638.99		tumour: cd31 Weak Area (μm²)	1549.68		tumour: cd31 Weak Area (μm²)	1374.85
	tumour: cd31 Moderate Area (μm²)	371.923		tumour: cd31 Moderate Area (μm²)	854.917		tumour: cd31 Moderate Area (μm²)	1388.01		tumour: cd31 Moderate Area (μm²)	1157.52		tumour: cd31 Moderate Area (μm²)	1301.23		tumour: cd31 Moderate Area (μm²)	1440.38		tumour: cd31 Moderate Area (μm²)	1194.46		tumour: cd31 Moderate Area (μm²)	1065.67
	tumour: cd31 Strong Area (μm²)	247.949		tumour: cd31 Strong Area (μm²)	605.451		tumour: cd31 Strong Area (μm²)	1669.35		tumour: cd31 Strong Area (μm²)	768.641		tumour: cd31 Strong Area (μm²)	1947.16		tumour: cd31 Strong Area (μm²)	1256.19		tumour: cd31 Strong Area (μm²)	950.555		tumour: cd31 Strong Area (μm²)	1131.46
	tumour: % nucleous Positive Tissue	80.6542		tumour: % nucleous Positive Tissue	73.7754		tumour: % nucleous Positive Tissue	49.2228		tumour: % nucleous Positive Tissue	51.2823		tumour: % nucleous Positive Tissue	63.2486		tumour: % nucleous Positive Tissue	69.2496		tumour: % nucleous Positive Tissue	66.1629		tumour: % nucleous Positive Tissue	69.6949
	tumour: % nucleous Positive Tissue (weak)	15.4052		tumour: % nucleous Positive Tissue (weak)	19.654		tumour: % nucleous Positive Tissue (weak)	16.4401		tumour: % nucleous Positive Tissue (weak)	17.6463		tumour: % nucleous Positive Tissue (weak)	18.0201		tumour: % nucleous Positive Tissue (weak)	18.2161		tumour: % nucleous Positive Tissue (weak)	19.4004		tumour: % nucleous Positive Tissue (weak)	16.2504
	tumour: % nucleous Positive Tissue (moderate)	13.4478		tumour: % nucleous Positive Tissue (moderate)	12.6293		tumour: % nucleous Positive Tissue (moderate)	10.5508		tumour: % nucleous Positive Tissue (moderate)	11.4418		tumour: % nucleous Positive Tissue (moderate)	14.1101		tumour: % nucleous Positive Tissue (moderate)	14.789		tumour: % nucleous Positive Tissue (moderate)	13.8808		tumour: % nucleous Positive Tissue (moderate)	13.3864
	tumour: % nucleous Positive Tissue (strong)	51.8012		tumour: % nucleous Positive Tissue (strong)	41.4921		tumour: % nucleous Positive Tissue (strong)	22.2319		tumour: % nucleous Positive Tissue (strong)	22.1941		tumour: % nucleous Positive Tissue (strong)	31.1184		tumour: % nucleous Positive Tissue (strong)	36.2444		tumour: % nucleous Positive Tissue (strong)	32.8817		tumour: % nucleous Positive Tissue (strong)	40.0581
	tumour: % cd31 Positive Tissue	0.214046		tumour: % cd31 Positive Tissue	0.453375		tumour: % cd31 Positive Tissue	1.20819		tumour: % cd31 Positive Tissue	0.755188		tumour: % cd31 Positive Tissue	0.982721		tumour: % cd31 Positive Tissue	0.96251		tumour: % cd31 Positive Tissue	0.545418		tumour: % cd31 Positive Tissue	0.622924		0.718046
	tumour: % cd31 Positive Tissue (weak)	0.108061		tumour: % cd31 Positive Tissue (weak)	0.213646		tumour: % cd31 Positive Tissue (weak)	0.418798		tumour: % cd31 Positive Tissue (weak)	0.33945		tumour: % cd31 Positive Tissue (weak)	0.325338		tumour: % cd31 Positive Tissue (weak)	0.363862		tumour: % cd31 Positive Tissue (weak)	0.228767		tumour: % cd31 Positive Tissue (weak)	0.239763
	tumour: % cd31 Positive Tissue (moderate)	0.063591		tumour: % cd31 Positive Tissue (moderate)	0.14034		tumour: % cd31 Positive Tissue (moderate)	0.358373		tumour: % cd31 Positive Tissue (moderate)	0.249836		tumour: % cd31 Positive Tissue (moderate)	0.263332		tumour: % cd31 Positive Tissue (moderate)	0.319769		tumour: % cd31 Positive Tissue (moderate)	0.176328		tumour: % cd31 Positive Tissue (moderate)	0.185845
	tumour: % cd31 Positive Tissue (strong)	0.042394		tumour: % cd31 Positive Tissue (strong)	0.099389		tumour: % cd31 Positive Tissue (strong)	0.431014		tumour: % cd31 Positive Tissue (strong)	0.165902		tumour: % cd31 Positive Tissue (strong)	0.394051		tumour: % cd31 Positive Tissue (strong)	0.278879		tumour: % cd31 Positive Tissue (strong)	0.140323		tumour: % cd31 Positive Tissue (strong)	0.197317
	tumour: nucleous Average Positive Optical Density	0.517651		tumour: nucleous Average Positive Optical Density	0.482429		tumour: nucleous Average Positive Optical Density	0.391114		tumour: nucleous Average Positive Optical Density	0.365118		tumour: nucleous Average Positive Optical Density	0.39724		tumour: nucleous Average Positive Optical Density	0.419023		tumour: nucleous Average Positive Optical Density	0.411102		tumour: nucleous Average Positive Optical Density	0.476256
	tumour: cd31 Average Positive Optical Density	0.547303		tumour: cd31 Average Positive Optical Density	0.553492		tumour: cd31 Average Positive Optical Density	0.6352		tumour: cd31 Average Positive Optical Density	0.552352		tumour: cd31 Average Positive Optical Density	0.658041		tumour: cd31 Average Positive Optical Density	0.585443		tumour: cd31 Average Positive Optical Density	0.57018		tumour: cd31 Average Positive Optical Density	0.61171
	tumour: % Negative Tissue	19.2275		tumour: % Negative Tissue	25.9762		tumour: % Negative Tissue	49.8284		tumour: % Negative Tissue	48.161		tumour: % Negative Tissue	36.0689		tumour: % Negative Tissue	30.1265		tumour: % Negative Tissue	33.5046		tumour: % Negative Tissue	29.9167
	BSNA37.2b	HOM
	Name	Value		Name	Value		Name	Value		Name	Value		Name	Value		Name	Value		Name	Value		Name	Value
	Classified Area (mm²)	0.68457		Classified Area (mm²)	0.79807		Classified Area (mm²)	0.74599		Classified Area (mm²)	0.86316		Classified Area (mm²)	0.47214		Classified Area (mm²)	0.84691		Classified Area (mm²)	0.82952		Classified Area (mm²)	0.6288
	tumour Area (mm²)	0.66571		tumour Area (mm²)	0.79807		tumour Area (mm²)	0.74559		tumour Area (mm²)	0.86316		tumour Area (mm²)	0.47213		tumour Area (mm²)	0.84691		tumour Area (mm²)	0.82952		tumour Area (mm²)	0.62265
	Necrosis Area (mm²)	0		Necrosis Area (mm²)	0		Necrosis Area (mm²)	0		Necrosis Area (mm²)	0		Necrosis Area (mm²)	0		Necrosis Area (mm²)	0		Necrosis Area (mm²)	0		Necrosis Area (mm²)	0.00027
	Empty Area (mm²)	0.01597		Empty Area (mm²)	0		Empty Area (mm²)	5e-05		Empty Area (mm²)	0		Empty Area (mm²)	2e-05		Empty Area (mm²)	0		Empty Area (mm²)	0		Empty Area (mm²)	0.00588
	Normal Area (mm²)	0.00288		Normal Area (mm²)	0		Normal Area (mm²)	0.00035		Normal Area (mm²)	0		Normal Area (mm²)	0		Normal Area (mm²)	0		Normal Area (mm²)	0		Normal Area (mm²)	0
	Tissue Area Analyzed (μm²)	655203		Tissue Area Analyzed (μm²)	794752		Tissue Area Analyzed (μm²)	740908		Tissue Area Analyzed (μm²)	862183		Tissue Area Analyzed (μm²)	470945		Tissue Area Analyzed (μm²)	845210		Tissue Area Analyzed (μm²)	827887		Tissue Area Analyzed (μm²)	612746
	nucleous Area (μm²)	410573		nucleous Area (μm²)	517315		nucleous Area (μm²)	508136		nucleous Area (μm²)	512065		nucleous Area (μm²)	329445		nucleous Area (μm²)	560476		nucleous Area (μm²)	484944		nucleous Area (μm²)	333478
	nucleous Weak Area (μm²)	136927		nucleous Weak Area (μm²)	203425		nucleous Weak Area (μm²)	211466		nucleous Weak Area (μm²)	203033		nucleous Weak Area (μm²)	116087		nucleous Weak Area (μm²)	256775		nucleous Weak Area (μm²)	215856		nucleous Weak Area (μm²)	122729
	nucleous Moderate Area (μm²)	83899		nucleous Moderate Area (μm²)	106056		nucleous Moderate Area (μm²)	99763		nucleous Moderate Area (μm²)	102628		nucleous Moderate Area (μm²)	65474.4		nucleous Moderate Area (μm²)	102504		nucleous Moderate Area (μm²)	87465.2		nucleous Moderate Area (μm²)	73081.6
	nucleous Strong Area (μm²)	189747		nucleous Strong Area (μm²)	207834		nucleous Strong Area (μm²)	196907		nucleous Strong Area (μm²)	206404		nucleous Strong Area (μm²)	147884		nucleous Strong Area (μm²)	201197		nucleous Strong Area (μm²)	181623		nucleous Strong Area (μm²)	137667
	cd31 Area (μm²)	11835.5		cd31 Area (μm²)	7122.96		cd31 Area (μm²)	4586.55		cd31 Area (μm²)	2753.5		cd31 Area (μm²)	1565.62		cd31 Area (μm²)	3998.3		cd31 Area (μm²)	11014		cd31 Area (μm²)	2141.22
	cd31 Weak Area (μm²)	3826.26		cd31 Weak Area (μm²)	3033.07		cd31 Weak Area (μm²)	2295.3		cd31 Weak Area (μm²)	1482.13		cd31 Weak Area (μm²)	849.604		cd31 Weak Area (μm²)	2176.13		cd31 Weak Area (μm²)	4643.22		cd31 Weak Area (μm²)	1170.17
	cd31 Moderate Area (μm²)	3521.38		cd31 Moderate Area (μm²)	2304.91		cd31 Moderate Area (μm²)	1465.18		cd31 Moderate Area (μm²)	834.677		cd31 Moderate Area (μm²)	432.392		cd31 Moderate Area (μm²)	1253.66		cd31 Moderate Area (μm²)	3619.29		cd31 Moderate Area (μm²)	700.329
	cd31 Strong Area (μm²)	4487.87		cd31 Strong Area (μm²)	1784.98		cd31 Strong Area (μm²)	826.074		cd31 Strong Area (μm²)	436.694		cd31 Strong Area (μm²)	283.623		cd31 Strong Area (μm²)	568.511		cd31 Strong Area (μm²)	2751.47		cd31 Strong Area (μm²)	270.72
	% nucleous Positive Tissue	62.6634		% nucleous Positive Tissue	65.0915		% nucleous Positive Tissue	68.5829		% nucleous Positive Tissue	59.3917		% nucleous Positive Tissue	69.954		% nucleous Positive Tissue	66.312		% nucleous Positive Tissue	58.576		% nucleous Positive Tissue	54.4236
	% nucleous Positive Tissue (weak)	20.8984		% nucleous Positive Tissue (weak)	25.5961		% nucleous Positive Tissue (weak)	28.5415		% nucleous Positive Tissue (weak)	23.5487		% nucleous Positive Tissue (weak)	24.6498		% nucleous Positive Tissue (weak)	30.38		% nucleous Positive Tissue (weak)	26.0731		% nucleous Positive Tissue (weak)	20.0294
	% nucleous Positive Tissue (moderate)	12.805		% nucleous Positive Tissue (moderate)	13.3445		% nucleous Positive Tissue (moderate)	13.465		% nucleous Positive Tissue (moderate)	11.9033		% nucleous Positive Tissue (moderate)	13.9028		% nucleous Positive Tissue (moderate)	12.1276		% nucleous Positive Tissue (moderate)	10.5649		% nucleous Positive Tissue (moderate)	11.9269
	% nucleous Positive Tissue (strong)	28.96		% nucleous Positive Tissue (strong)	26.1509		% nucleous Positive Tissue (strong)	26.5765		% nucleous Positive Tissue (strong)	23.9397		% nucleous Positive Tissue (strong)	31.4014		% nucleous Positive Tissue (strong)	23.8044		% nucleous Positive Tissue (strong)	21.9381		% nucleous Positive Tissue (strong)	22.4673
	% cd31 Positive Tissue	1.80639		% cd31 Positive Tissue	0.89625		% cd31 Positive Tissue	0.619044		% cd31 Positive Tissue	0.319363		% cd31 Positive Tissue	0.332442		% cd31 Positive Tissue	0.473054		% cd31 Positive Tissue	1.33037		% cd31 Positive Tissue	0.349446
	% cd31 Positive Tissue (weak)	0.58398		% cd31 Positive Tissue (weak)	0.381638		% cd31 Positive Tissue (weak)	0.309795		% cd31 Positive Tissue (weak)	0.171904		% cd31 Positive Tissue (weak)	0.180404		% cd31 Positive Tissue (weak)	0.257466		% cd31 Positive Tissue (weak)	0.560852		% cd31 Positive Tissue (weak)	0.190971
	% cd31 Positive Tissue (moderate)	0.537448		% cd31 Positive Tissue (moderate)	0.290017		% cd31 Positive Tissue (moderate)	0.197754		% cd31 Positive Tissue (moderate)	0.09681		% cd31 Positive Tissue (moderate)	0.091814		% cd31 Positive Tissue (moderate)	0.148325		% cd31 Positive Tissue (moderate)	0.437172		% cd31 Positive Tissue (moderate)	0.114294
	% cd31 Positive Tissue (strong)	0.684959		% cd31 Positive Tissue (strong)	0.224596		% cd31 Positive Tissue (strong)	0.111495		% cd31 Positive Tissue (strong)	0.05065		% cd31 Positive Tissue (strong)	0.060224		% cd31 Positive Tissue (strong)	0.067263		% cd31 Positive Tissue (strong)	0.332349		% cd31 Positive Tissue (strong)	0.044181
	nucleous Average Positive Optical Density	0.404365		nucleous Average Positive Optical Density	0.353587		nucleous Average Positive Optical Density	0.353319		nucleous Average Positive Optical Density	0.348839		nucleous Average Positive Optical Density	0.372011		nucleous Average Positive Optical Density	0.335598		nucleous Average Positive Optical Density	0.347027		nucleous Average Positive Optical Density	0.353159
	cd31 Average Positive Optical Density	0.6375		cd31 Average Positive Optical Density	0.56629		cd31 Average Positive Optical Density	0.537069		cd31 Average Positive Optical Density	0.525169		cd31 Average Positive Optical Density	0.535113		cd31 Average Positive Optical Density	0.517499		cd31 Average Positive Optical Density	0.566239		cd31 Average Positive Optical Density	0.513522
	% Negative Tissue	36.1438		% Negative Tissue	34.2346		% Negative Tissue	31.0332		% Negative Tissue	40.3383		% Negative Tissue	29.8574		% Negative Tissue	33.3785		% Negative Tissue	40.4872		% Negative Tissue	45.3246
	tumour: Tissue Area Analyzed (μm²)	655203		tumour: Tissue Area Analyzed (μm²)	794752		tumour: Tissue Area Analyzed (μm²)	740908		tumour: Tissue Area Analyzed (μm²)	862183		tumour: Tissue Area Analyzed (μm²)	470945		tumour: Tissue Area Analyzed (μm²)	845210		tumour: Tissue Area Analyzed (μm²)	827887		tumour: Tissue Area Analyzed (μm²)	612746
	tumour: nucleous Area (μm²)	410573		tumour: nucleous Area (μm²)	517315		tumour: nucleous Area (μm²)	508136		tumour: nucleous Area (μm²)	512065		tumour: nucleous Area (μm²)	329445		tumour: nucleous Area (μm²)	560476		tumour: nucleous Area (μm²)	484944		tumour: nucleous Area (μm²)	333478
	tumour: nucleous Weak Area (μm²)	136927		tumour: nucleous Weak Area (μm²)	203425		tumour: nucleous Weak Area (μm²)	211466		tumour: nucleous Weak Area (μm²)	203033		tumour: nucleous Weak Area (μm²)	116087		tumour: nucleous Weak Area (μm²)	256775		tumour: nucleous Weak Area (μm²)	215856		tumour: nucleous Weak Area (μm²)	122729
	tumour: nucleous Moderate Area (μm²)	83899		tumour: nucleous Moderate Area (μm²)	106056		tumour: nucleous Moderate Area (μm²)	99763		tumour: nucleous Moderate Area (μm²)	102628		tumour: nucleous Moderate Area (μm²)	65474.4		tumour: nucleous Moderate Area (μm²)	102504		tumour: nucleous Moderate Area (μm²)	87465.2		tumour: nucleous Moderate Area (μm²)	73081.6
	tumour: nucleous Strong Area (μm²)	189747		tumour: nucleous Strong Area (μm²)	207834		tumour: nucleous Strong Area (μm²)	196907		tumour: nucleous Strong Area (μm²)	206404		tumour: nucleous Strong Area (μm²)	147884		tumour: nucleous Strong Area (μm²)	201197		tumour: nucleous Strong Area (μm²)	181623		tumour: nucleous Strong Area (μm²)	137667
	tumour: cd31 Area (μm²)	11835.5		tumour: cd31 Area (μm²)	7122.96		tumour: cd31 Area (μm²)	4586.55		tumour: cd31 Area (μm²)	2753.5		tumour: cd31 Area (μm²)	1565.62		tumour: cd31 Area (μm²)	3998.3		tumour: cd31 Area (μm²)	11014		tumour: cd31 Area (μm²)	2141.22
	tumour: cd31 Weak Area (μm²)	3826.26		tumour: cd31 Weak Area (μm²)	3033.07		tumour: cd31 Weak Area (μm²)	2295.3		tumour: cd31 Weak Area (μm²)	1482.13		tumour: cd31 Weak Area (μm²)	849.604		tumour: cd31 Weak Area (μm²)	2176.13		tumour: cd31 Weak Area (μm²)	4643.22		tumour: cd31 Weak Area (μm²)	1170.17
	tumour: cd31 Moderate Area (μm²)	3521.38		tumour: cd31 Moderate Area (μm²)	2304.91		tumour: cd31 Moderate Area (μm²)	1465.18		tumour: cd31 Moderate Area (μm²)	834.677		tumour: cd31 Moderate Area (μm²)	432.392		tumour: cd31 Moderate Area (μm²)	1253.66		tumour: cd31 Moderate Area (μm²)	3619.29		tumour: cd31 Moderate Area (μm²)	700.329
	tumour: cd31 Strong Area (μm²)	4487.87		tumour: cd31 Strong Area (μm²)	1784.98		tumour: cd31 Strong Area (μm²)	826.074		tumour: cd31 Strong Area (μm²)	436.694		tumour: cd31 Strong Area (μm²)	283.623		tumour: cd31 Strong Area (μm²)	568.511		tumour: cd31 Strong Area (μm²)	2751.47		tumour: cd31 Strong Area (μm²)	270.72
	tumour: % nucleous Positive Tissue	62.6634		tumour: % nucleous Positive Tissue	65.0915		tumour: % nucleous Positive Tissue	68.5829		tumour: % nucleous Positive Tissue	59.3917		tumour: % nucleous Positive Tissue	69.954		tumour: % nucleous Positive Tissue	66.312		tumour: % nucleous Positive Tissue	58.576		tumour: % nucleous Positive Tissue	54.4236
	tumour: % nucleous Positive Tissue (weak)	20.8984		tumour: % nucleous Positive Tissue (weak)	25.5961		tumour: % nucleous Positive Tissue (weak)	28.5415		tumour: % nucleous Positive Tissue (weak)	23.5487		tumour: % nucleous Positive Tissue (weak)	24.6498		tumour: % nucleous Positive Tissue (weak)	30.38		tumour: % nucleous Positive Tissue (weak)	26.0731		tumour: % nucleous Positive Tissue (weak)	20.0294
	tumour: % nucleous Positive Tissue (moderate)	12.805		tumour: % nucleous Positive Tissue (moderate)	13.3445		tumour: % nucleous Positive Tissue (moderate)	13.465		tumour: % nucleous Positive Tissue (moderate)	11.9033		tumour: % nucleous Positive Tissue (moderate)	13.9028		tumour: % nucleous Positive Tissue (moderate)	12.1276		tumour: % nucleous Positive Tissue (moderate)	10.5649		tumour: % nucleous Positive Tissue (moderate)	11.9269
	tumour: % nucleous Positive Tissue (strong)	28.96		tumour: % nucleous Positive Tissue (strong)	26.1509		tumour: % nucleous Positive Tissue (strong)	26.5765		tumour: % nucleous Positive Tissue (strong)	23.9397		tumour: % nucleous Positive Tissue (strong)	31.4014		tumour: % nucleous Positive Tissue (strong)	23.8044		tumour: % nucleous Positive Tissue (strong)	21.9381		tumour: % nucleous Positive Tissue (strong)	22.4673
	tumour: % cd31 Positive Tissue	1.80639		tumour: % cd31 Positive Tissue	0.89625		tumour: % cd31 Positive Tissue	0.619044		tumour: % cd31 Positive Tissue	0.319363		tumour: % cd31 Positive Tissue	0.332442		tumour: % cd31 Positive Tissue	0.473054		tumour: % cd31 Positive Tissue	1.33037		tumour: % cd31 Positive Tissue	0.349446		0.765795
	tumour: % cd31 Positive Tissue (weak)	0.58398		tumour: % cd31 Positive Tissue (weak)	0.381638		tumour: % cd31 Positive Tissue (weak)	0.309795		tumour: % cd31 Positive Tissue (weak)	0.171904		tumour: % cd31 Positive Tissue (weak)	0.180404		tumour: % cd31 Positive Tissue (weak)	0.257466		tumour: % cd31 Positive Tissue (weak)	0.560852		tumour: % cd31 Positive Tissue (weak)	0.190971
	tumour: % cd31 Positive Tissue (moderate)	0.537448		tumour: % cd31 Positive Tissue (moderate)	0.290017		tumour: % cd31 Positive Tissue (moderate)	0.197754		tumour: % cd31 Positive Tissue (moderate)	0.09681		tumour: % cd31 Positive Tissue (moderate)	0.091814		tumour: % cd31 Positive Tissue (moderate)	0.148325		tumour: % cd31 Positive Tissue (moderate)	0.437172		tumour: % cd31 Positive Tissue (moderate)	0.114294
	tumour: % cd31 Positive Tissue (strong)	0.684959		tumour: % cd31 Positive Tissue (strong)	0.224596		tumour: % cd31 Positive Tissue (strong)	0.111495		tumour: % cd31 Positive Tissue (strong)	0.05065		tumour: % cd31 Positive Tissue (strong)	0.060224		tumour: % cd31 Positive Tissue (strong)	0.067263		tumour: % cd31 Positive Tissue (strong)	0.332349		tumour: % cd31 Positive Tissue (strong)	0.044181
	tumour: nucleous Average Positive Optical Density	0.404365		tumour: nucleous Average Positive Optical Density	0.353587		tumour: nucleous Average Positive Optical Density	0.353319		tumour: nucleous Average Positive Optical Density	0.348839		tumour: nucleous Average Positive Optical Density	0.372011		tumour: nucleous Average Positive Optical Density	0.335598		tumour: nucleous Average Positive Optical Density	0.347027		tumour: nucleous Average Positive Optical Density	0.353159
	tumour: cd31 Average Positive Optical Density	0.6375		tumour: cd31 Average Positive Optical Density	0.56629		tumour: cd31 Average Positive Optical Density	0.537069		tumour: cd31 Average Positive Optical Density	0.525169		tumour: cd31 Average Positive Optical Density	0.535113		tumour: cd31 Average Positive Optical Density	0.517499		tumour: cd31 Average Positive Optical Density	0.566239		tumour: cd31 Average Positive Optical Density	0.513522
	tumour: % Negative Tissue	36.1438		tumour: % Negative Tissue	34.2346		tumour: % Negative Tissue	31.0332		tumour: % Negative Tissue	40.3383		tumour: % Negative Tissue	29.8574		tumour: % Negative Tissue	33.3785		tumour: % Negative Tissue	40.4872		tumour: % Negative Tissue	45.3246
	BSNA43.1c	WT
	Name	Value		Name	Value		Name	Value		Name	Value		Name	Value		Name	Value		Name	Value		Name	Value
	Classified Area (mm²)	1.04209		Classified Area (mm²)	1.06076		Classified Area (mm²)	0.44781		Classified Area (mm²)	0.56821		Classified Area (mm²)	0.66526		Classified Area (mm²)	0.50697		Classified Area (mm²)	0.57504		Classified Area (mm²)	0.692
	tumour Area (mm²)	1.00819		tumour Area (mm²)	1.02965		tumour Area (mm²)	0.44367		tumour Area (mm²)	0.56783		tumour Area (mm²)	0.66012		tumour Area (mm²)	0.50689		tumour Area (mm²)	0.56892		tumour Area (mm²)	0.69091
	Necrosis Area (mm²)	0.0053		Necrosis Area (mm²)	0		Necrosis Area (mm²)	0		Necrosis Area (mm²)	0		Necrosis Area (mm²)	0		Necrosis Area (mm²)	0		Necrosis Area (mm²)	0		Necrosis Area (mm²)	0
	Empty Area (mm²)	0.02839		Empty Area (mm²)	0.03111		Empty Area (mm²)	0.00413		Empty Area (mm²)	0.00013		Empty Area (mm²)	0.0033		Empty Area (mm²)	8e-05		Empty Area (mm²)	0.00612		Empty Area (mm²)	0.00109
	Normal Area (mm²)	0.00021		Normal Area (mm²)	0		Normal Area (mm²)	0		Normal Area (mm²)	0.00026		Normal Area (mm²)	0.00184		Normal Area (mm²)	0		Normal Area (mm²)	0		Normal Area (mm²)	0
	Tissue Area Analyzed (μm²)	978429		Tissue Area Analyzed (μm²)	1.02107e+06		Tissue Area Analyzed (μm²)	438237		Tissue Area Analyzed (μm²)	567181		Tissue Area Analyzed (μm²)	656221		Tissue Area Analyzed (μm²)	505986		Tissue Area Analyzed (μm²)	551216		Tissue Area Analyzed (μm²)	689449
	nucleous Area (μm²)	305998		nucleous Area (μm²)	332461		nucleous Area (μm²)	153319		nucleous Area (μm²)	222160		nucleous Area (μm²)	214467		nucleous Area (μm²)	157246		nucleous Area (μm²)	167001		nucleous Area (μm²)	254884
	nucleous Weak Area (μm²)	124243		nucleous Weak Area (μm²)	125712		nucleous Weak Area (μm²)	58842.1		nucleous Weak Area (μm²)	84345.6		nucleous Weak Area (μm²)	85364.7		nucleous Weak Area (μm²)	59739.5		nucleous Weak Area (μm²)	62466.2		nucleous Weak Area (μm²)	94329.3
	nucleous Moderate Area (μm²)	77048.1		nucleous Moderate Area (μm²)	79467.3		nucleous Moderate Area (μm²)	36753.4		nucleous Moderate Area (μm²)	51003.8		nucleous Moderate Area (μm²)	50974.2		nucleous Moderate Area (μm²)	37504.3		nucleous Moderate Area (μm²)	39532.1		nucleous Moderate Area (μm²)	61204.9
	nucleous Strong Area (μm²)	104708		nucleous Strong Area (μm²)	127281		nucleous Strong Area (μm²)	57724		nucleous Strong Area (μm²)	86810.7		nucleous Strong Area (μm²)	78128.2		nucleous Strong Area (μm²)	60002.1		nucleous Strong Area (μm²)	65002.8		nucleous Strong Area (μm²)	99349.5
	cd31 Area (μm²)	26805.3		cd31 Area (μm²)	27397.8		cd31 Area (μm²)	16917.7		cd31 Area (μm²)	12525		cd31 Area (μm²)	13978.5		cd31 Area (μm²)	10686.8		cd31 Area (μm²)	12362.5		cd31 Area (μm²)	29699.2
	cd31 Weak Area (μm²)	8313.37		cd31 Weak Area (μm²)	9919.72		cd31 Weak Area (μm²)	5816.17		cd31 Weak Area (μm²)	4231.83		cd31 Weak Area (μm²)	5118.12		cd31 Weak Area (μm²)	3799.94		cd31 Weak Area (μm²)	4825.64		cd31 Weak Area (μm²)	8034.05
	cd31 Moderate Area (μm²)	7617.6		cd31 Moderate Area (μm²)	8359.92		cd31 Moderate Area (μm²)	5329.13		cd31 Moderate Area (μm²)	3863.19		cd31 Moderate Area (μm²)	4396.03		cd31 Moderate Area (μm²)	3220.55		cd31 Moderate Area (μm²)	3945.93		cd31 Moderate Area (μm²)	8142.34
	cd31 Strong Area (μm²)	10874.3		cd31 Strong Area (μm²)	9118.19		cd31 Strong Area (μm²)	5772.4		cd31 Strong Area (μm²)	4429.93		cd31 Strong Area (μm²)	4464.34		cd31 Strong Area (μm²)	3666.35		cd31 Strong Area (μm²)	3590.96		cd31 Strong Area (μm²)	13522.8
	% nucleous Positive Tissue	31.2745		% nucleous Positive Tissue	32.5601		% nucleous Positive Tissue	34.9855		% nucleous Positive Tissue	39.1692		% nucleous Positive Tissue	32.6821		% nucleous Positive Tissue	31.0771		% nucleous Positive Tissue	30.2968		% nucleous Positive Tissue	36.9692
	% nucleous Positive Tissue (weak)	12.6982		% nucleous Positive Tissue (weak)	12.3119		% nucleous Positive Tissue (weak)	13.427		% nucleous Positive Tissue (weak)	14.871		% nucleous Positive Tissue (weak)	13.0085		% nucleous Positive Tissue (weak)	11.8066		% nucleous Positive Tissue (weak)	11.3324		% nucleous Positive Tissue (weak)	13.6818
	% nucleous Positive Tissue (moderate)	7.87467		% nucleous Positive Tissue (moderate)	7.78277		% nucleous Positive Tissue (moderate)	8.38664		% nucleous Positive Tissue (moderate)	8.99251		% nucleous Positive Tissue (moderate)	7.76784		% nucleous Positive Tissue (moderate)	7.41212		% nucleous Positive Tissue (moderate)	7.1718		% nucleous Positive Tissue (moderate)	8.87737
	% nucleous Positive Tissue (strong)	10.7016		% nucleous Positive Tissue (strong)	12.4655		% nucleous Positive Tissue (strong)	13.1719		% nucleous Positive Tissue (strong)	15.3056		% nucleous Positive Tissue (strong)	11.9058		% nucleous Positive Tissue (strong)	11.8585		% nucleous Positive Tissue (strong)	11.7926		% nucleous Positive Tissue (strong)	14.41
	% cd31 Positive Tissue	2.73963		% cd31 Positive Tissue	2.68325		% cd31 Positive Tissue	3.8604		% cd31 Positive Tissue	2.20828		% cd31 Positive Tissue	2.13015		% cd31 Positive Tissue	2.11208		% cd31 Positive Tissue	2.24277		% cd31 Positive Tissue	4.30767
	% cd31 Positive Tissue (weak)	0.849665		% cd31 Positive Tissue (weak)	0.971506		% cd31 Positive Tissue (weak)	1.32717		% cd31 Positive Tissue (weak)	0.746116		% cd31 Positive Tissue (weak)	0.779938		% cd31 Positive Tissue (weak)	0.750998		% cd31 Positive Tissue (weak)	0.875453		% cd31 Positive Tissue (weak)	1.16529
	% cd31 Positive Tissue (moderate)	0.778554		% cd31 Positive Tissue (moderate)	0.818744		% cd31 Positive Tissue (moderate)	1.21604		% cd31 Positive Tissue (moderate)	0.681122		% cd31 Positive Tissue (moderate)	0.669901		% cd31 Positive Tissue (moderate)	0.636491		% cd31 Positive Tissue (moderate)	0.715858		% cd31 Positive Tissue (moderate)	1.18099
	% cd31 Positive Tissue (strong)	1.11141		% cd31 Positive Tissue (strong)	0.893006		% cd31 Positive Tissue (strong)	1.31719		% cd31 Positive Tissue (strong)	0.781044		% cd31 Positive Tissue (strong)	0.680311		% cd31 Positive Tissue (strong)	0.724596		% cd31 Positive Tissue (strong)	0.651461		% cd31 Positive Tissue (strong)	1.9614
	nucleous Average Positive Optical Density	0.324817		nucleous Average Positive Optical Density	0.338634		nucleous Average Positive Optical Density	0.339208		nucleous Average Positive Optical Density	0.343772		nucleous Average Positive Optical Density	0.331936		nucleous Average Positive Optical Density	0.336208		nucleous Average Positive Optical Density	0.337921		nucleous Average Positive Optical Density	0.339529
	cd31 Average Positive Optical Density	0.650601		cd31 Average Positive Optical Density	0.606324		cd31 Average Positive Optical Density	0.608722		cd31 Average Positive Optical Density	0.615969		cd31 Average Positive Optical Density	0.602589		cd31 Average Positive Optical Density	0.615021		cd31 Average Positive Optical Density	0.586795		cd31 Average Positive Optical Density	0.683363
	% Negative Tissue	66.4688		% Negative Tissue	65.1671		% Negative Tissue	61.9443		% Negative Tissue	59.0102		% Negative Tissue	65.5342		% Negative Tissue	67.0232		% Negative Tissue	67.7138		% Negative Tissue	59.4802
	tumour: Tissue Area Analyzed (μm²)	978429		tumour: Tissue Area Analyzed (μm²)	1.02107e+06		tumour: Tissue Area Analyzed (μm²)	438237		tumour: Tissue Area Analyzed (μm²)	567181		tumour: Tissue Area Analyzed (μm²)	656221		tumour: Tissue Area Analyzed (μm²)	505986		tumour: Tissue Area Analyzed (μm²)	551216		tumour: Tissue Area Analyzed (μm²)	689449
	tumour: nucleous Area (μm²)	305998		tumour: nucleous Area (μm²)	332461		tumour: nucleous Area (μm²)	153319		tumour: nucleous Area (μm²)	222160		tumour: nucleous Area (μm²)	214467		tumour: nucleous Area (μm²)	157246		tumour: nucleous Area (μm²)	167001		tumour: nucleous Area (μm²)	254884
	tumour: nucleous Weak Area (μm²)	124243		tumour: nucleous Weak Area (μm²)	125712		tumour: nucleous Weak Area (μm²)	58842.1		tumour: nucleous Weak Area (μm²)	84345.6		tumour: nucleous Weak Area (μm²)	85364.7		tumour: nucleous Weak Area (μm²)	59739.5		tumour: nucleous Weak Area (μm²)	62466.2		tumour: nucleous Weak Area (μm²)	94329.3
	tumour: nucleous Moderate Area (μm²)	77048.1		tumour: nucleous Moderate Area (μm²)	79467.3		tumour: nucleous Moderate Area (μm²)	36753.4		tumour: nucleous Moderate Area (μm²)	51003.8		tumour: nucleous Moderate Area (μm²)	50974.2		tumour: nucleous Moderate Area (μm²)	37504.3		tumour: nucleous Moderate Area (μm²)	39532.1		tumour: nucleous Moderate Area (μm²)	61204.9
	tumour: nucleous Strong Area (μm²)	104708		tumour: nucleous Strong Area (μm²)	127281		tumour: nucleous Strong Area (μm²)	57724		tumour: nucleous Strong Area (μm²)	86810.7		tumour: nucleous Strong Area (μm²)	78128.2		tumour: nucleous Strong Area (μm²)	60002.1		tumour: nucleous Strong Area (μm²)	65002.8		tumour: nucleous Strong Area (μm²)	99349.5
	tumour: cd31 Area (μm²)	26805.3		tumour: cd31 Area (μm²)	27397.8		tumour: cd31 Area (μm²)	16917.7		tumour: cd31 Area (μm²)	12525		tumour: cd31 Area (μm²)	13978.5		tumour: cd31 Area (μm²)	10686.8		tumour: cd31 Area (μm²)	12362.5		tumour: cd31 Area (μm²)	29699.2
	tumour: cd31 Weak Area (μm²)	8313.37		tumour: cd31 Weak Area (μm²)	9919.72		tumour: cd31 Weak Area (μm²)	5816.17		tumour: cd31 Weak Area (μm²)	4231.83		tumour: cd31 Weak Area (μm²)	5118.12		tumour: cd31 Weak Area (μm²)	3799.94		tumour: cd31 Weak Area (μm²)	4825.64		tumour: cd31 Weak Area (μm²)	8034.05
	tumour: cd31 Moderate Area (μm²)	7617.6		tumour: cd31 Moderate Area (μm²)	8359.92		tumour: cd31 Moderate Area (μm²)	5329.13		tumour: cd31 Moderate Area (μm²)	3863.19		tumour: cd31 Moderate Area (μm²)	4396.03		tumour: cd31 Moderate Area (μm²)	3220.55		tumour: cd31 Moderate Area (μm²)	3945.93		tumour: cd31 Moderate Area (μm²)	8142.34
	tumour: cd31 Strong Area (μm²)	10874.3		tumour: cd31 Strong Area (μm²)	9118.19		tumour: cd31 Strong Area (μm²)	5772.4		tumour: cd31 Strong Area (μm²)	4429.93		tumour: cd31 Strong Area (μm²)	4464.34		tumour: cd31 Strong Area (μm²)	3666.35		tumour: cd31 Strong Area (μm²)	3590.96		tumour: cd31 Strong Area (μm²)	13522.8
	tumour: % nucleous Positive Tissue	31.2745		tumour: % nucleous Positive Tissue	32.5601		tumour: % nucleous Positive Tissue	34.9855		tumour: % nucleous Positive Tissue	39.1692		tumour: % nucleous Positive Tissue	32.6821		tumour: % nucleous Positive Tissue	31.0771		tumour: % nucleous Positive Tissue	30.2968		tumour: % nucleous Positive Tissue	36.9692
	tumour: % nucleous Positive Tissue (weak)	12.6982		tumour: % nucleous Positive Tissue (weak)	12.3119		tumour: % nucleous Positive Tissue (weak)	13.427		tumour: % nucleous Positive Tissue (weak)	14.871		tumour: % nucleous Positive Tissue (weak)	13.0085		tumour: % nucleous Positive Tissue (weak)	11.8066		tumour: % nucleous Positive Tissue (weak)	11.3324		tumour: % nucleous Positive Tissue (weak)	13.6818
	tumour: % nucleous Positive Tissue (moderate)	7.87467		tumour: % nucleous Positive Tissue (moderate)	7.78277		tumour: % nucleous Positive Tissue (moderate)	8.38664		tumour: % nucleous Positive Tissue (moderate)	8.99251		tumour: % nucleous Positive Tissue (moderate)	7.76784		tumour: % nucleous Positive Tissue (moderate)	7.41212		tumour: % nucleous Positive Tissue (moderate)	7.1718		tumour: % nucleous Positive Tissue (moderate)	8.87737
	tumour: % nucleous Positive Tissue (strong)	10.7016		tumour: % nucleous Positive Tissue (strong)	12.4655		tumour: % nucleous Positive Tissue (strong)	13.1719		tumour: % nucleous Positive Tissue (strong)	15.3056		tumour: % nucleous Positive Tissue (strong)	11.9058		tumour: % nucleous Positive Tissue (strong)	11.8585		tumour: % nucleous Positive Tissue (strong)	11.7926		tumour: % nucleous Positive Tissue (strong)	14.41
	tumour: % cd31 Positive Tissue	2.73963		tumour: % cd31 Positive Tissue	2.68325		tumour: % cd31 Positive Tissue	3.8604		tumour: % cd31 Positive Tissue	2.20828		tumour: % cd31 Positive Tissue	2.13015		tumour: % cd31 Positive Tissue	2.11208		tumour: % cd31 Positive Tissue	2.24277		tumour: % cd31 Positive Tissue	4.30767		2.78553
	tumour: % cd31 Positive Tissue (weak)	0.849665		tumour: % cd31 Positive Tissue (weak)	0.971506		tumour: % cd31 Positive Tissue (weak)	1.32717		tumour: % cd31 Positive Tissue (weak)	0.746116		tumour: % cd31 Positive Tissue (weak)	0.779938		tumour: % cd31 Positive Tissue (weak)	0.750998		tumour: % cd31 Positive Tissue (weak)	0.875453		tumour: % cd31 Positive Tissue (weak)	1.16529
	tumour: % cd31 Positive Tissue (moderate)	0.778554		tumour: % cd31 Positive Tissue (moderate)	0.818744		tumour: % cd31 Positive Tissue (moderate)	1.21604		tumour: % cd31 Positive Tissue (moderate)	0.681122		tumour: % cd31 Positive Tissue (moderate)	0.669901		tumour: % cd31 Positive Tissue (moderate)	0.636491		tumour: % cd31 Positive Tissue (moderate)	0.715858		tumour: % cd31 Positive Tissue (moderate)	1.18099
	tumour: % cd31 Positive Tissue (strong)	1.11141		tumour: % cd31 Positive Tissue (strong)	0.893006		tumour: % cd31 Positive Tissue (strong)	1.31719		tumour: % cd31 Positive Tissue (strong)	0.781044		tumour: % cd31 Positive Tissue (strong)	0.680311		tumour: % cd31 Positive Tissue (strong)	0.724596		tumour: % cd31 Positive Tissue (strong)	0.651461		tumour: % cd31 Positive Tissue (strong)	1.9614
	tumour: nucleous Average Positive Optical Density	0.324817		tumour: nucleous Average Positive Optical Density	0.338634		tumour: nucleous Average Positive Optical Density	0.339208		tumour: nucleous Average Positive Optical Density	0.343772		tumour: nucleous Average Positive Optical Density	0.331936		tumour: nucleous Average Positive Optical Density	0.336208		tumour: nucleous Average Positive Optical Density	0.337921		tumour: nucleous Average Positive Optical Density	0.339529
	tumour: cd31 Average Positive Optical Density	0.650601		tumour: cd31 Average Positive Optical Density	0.606324		tumour: cd31 Average Positive Optical Density	0.608722		tumour: cd31 Average Positive Optical Density	0.615969		tumour: cd31 Average Positive Optical Density	0.602589		tumour: cd31 Average Positive Optical Density	0.615021		tumour: cd31 Average Positive Optical Density	0.586795		tumour: cd31 Average Positive Optical Density	0.683363
	tumour: % Negative Tissue	66.4688		tumour: % Negative Tissue	65.1671		tumour: % Negative Tissue	61.9443		tumour: % Negative Tissue	59.0102		tumour: % Negative Tissue	65.5342		tumour: % Negative Tissue	67.0232		tumour: % Negative Tissue	67.7138		tumour: % Negative Tissue	59.4802
	BSNA7.2d	WT
	Name	Value		Name	Value		Name	Value		Name	Value		Name	Value		Name	Value		Name	Value		Name	Value
	Classified Area (mm²)	0.97416		Classified Area (mm²)	0.70536		Classified Area (mm²)	1.19242		Classified Area (mm²)	0.58178		Classified Area (mm²)	0.5137		Classified Area (mm²)	0.82711		Classified Area (mm²)	0.74331		Classified Area (mm²)	0.42346
	tumour Area (mm²)	0.97416		tumour Area (mm²)	0.7049		tumour Area (mm²)	1.19163		tumour Area (mm²)	0.58178		tumour Area (mm²)	0.5137		tumour Area (mm²)	0.82678		tumour Area (mm²)	0.74331		tumour Area (mm²)	0.42346
	Necrosis Area (mm²)	0		Necrosis Area (mm²)	0		Necrosis Area (mm²)	0		Necrosis Area (mm²)	0		Necrosis Area (mm²)	0		Necrosis Area (mm²)	0		Necrosis Area (mm²)	0		Necrosis Area (mm²)	0
	Empty Area (mm²)	0		Empty Area (mm²)	0.00046		Empty Area (mm²)	0.00078		Empty Area (mm²)	0		Empty Area (mm²)	0		Empty Area (mm²)	0.00034		Empty Area (mm²)	0		Empty Area (mm²)	0
	Normal Area (mm²)	0		Normal Area (mm²)	0		Normal Area (mm²)	0		Normal Area (mm²)	0		Normal Area (mm²)	0		Normal Area (mm²)	0		Normal Area (mm²)	0		Normal Area (mm²)	0
	Tissue Area Analyzed (μm²)	972473		Tissue Area Analyzed (μm²)	702714		Tissue Area Analyzed (μm²)	1.18275e+06		Tissue Area Analyzed (μm²)	580015		Tissue Area Analyzed (μm²)	512797		Tissue Area Analyzed (μm²)	824563		Tissue Area Analyzed (μm²)	742074		Tissue Area Analyzed (μm²)	422681
	nucleous Area (μm²)	671974		nucleous Area (μm²)	353791		nucleous Area (μm²)	686655		nucleous Area (μm²)	390950		nucleous Area (μm²)	353145		nucleous Area (μm²)	513894		nucleous Area (μm²)	557073		nucleous Area (μm²)	299010
	nucleous Weak Area (μm²)	280759		nucleous Weak Area (μm²)	153929		nucleous Weak Area (μm²)	312325		nucleous Weak Area (μm²)	172192		nucleous Weak Area (μm²)	148731		nucleous Weak Area (μm²)	211844		nucleous Weak Area (μm²)	252612		nucleous Weak Area (μm²)	111539
	nucleous Moderate Area (μm²)	126245		nucleous Moderate Area (μm²)	64863.7		nucleous Moderate Area (μm²)	124832		nucleous Moderate Area (μm²)	73191.7		nucleous Moderate Area (μm²)	63596.6		nucleous Moderate Area (μm²)	99187.9		nucleous Moderate Area (μm²)	100121		nucleous Moderate Area (μm²)	65044.6
	nucleous Strong Area (μm²)	264970		nucleous Strong Area (μm²)	134998		nucleous Strong Area (μm²)	249498		nucleous Strong Area (μm²)	145567		nucleous Strong Area (μm²)	140817		nucleous Strong Area (μm²)	202862		nucleous Strong Area (μm²)	204340		nucleous Strong Area (μm²)	122427
	cd31 Area (μm²)	57308.3		cd31 Area (μm²)	63512.1		cd31 Area (μm²)	75980.1		cd31 Area (μm²)	42700.6		cd31 Area (μm²)	41744.7		cd31 Area (μm²)	68972.5		cd31 Area (μm²)	45459.4		cd31 Area (μm²)	40336.7
	cd31 Weak Area (μm²)	16751.2		cd31 Weak Area (μm²)	13993.4		cd31 Weak Area (μm²)	19670.9		cd31 Weak Area (μm²)	10467.2		cd31 Weak Area (μm²)	10516.1		cd31 Weak Area (μm²)	15937.3		cd31 Weak Area (μm²)	12245.1		cd31 Weak Area (μm²)	9699.61
	cd31 Moderate Area (μm²)	16736.3		cd31 Moderate Area (μm²)	16066.8		cd31 Moderate Area (μm²)	20880.3		cd31 Moderate Area (μm²)	11395.3		cd31 Moderate Area (μm²)	11355.5		cd31 Moderate Area (μm²)	17955.5		cd31 Moderate Area (μm²)	12436.2		cd31 Moderate Area (μm²)	10583.1
	cd31 Strong Area (μm²)	23820.8		cd31 Strong Area (μm²)	33451.8		cd31 Strong Area (μm²)	35428.9		cd31 Strong Area (μm²)	20838.1		cd31 Strong Area (μm²)	19873.1		cd31 Strong Area (μm²)	35079.7		cd31 Strong Area (μm²)	20778.1		cd31 Strong Area (μm²)	20054
	% nucleous Positive Tissue	69.0996		% nucleous Positive Tissue	50.3463		% nucleous Positive Tissue	58.0559		% nucleous Positive Tissue	67.4035		% nucleous Positive Tissue	68.8664		% nucleous Positive Tissue	62.3232		% nucleous Positive Tissue	75.0697		% nucleous Positive Tissue	70.7414
	% nucleous Positive Tissue (weak)	28.8707		% nucleous Positive Tissue (weak)	21.9049		% nucleous Positive Tissue (weak)	26.4068		% nucleous Positive Tissue (weak)	29.6874		% nucleous Positive Tissue (weak)	29.0038		% nucleous Positive Tissue (weak)	25.6917		% nucleous Positive Tissue (weak)	34.0413		% nucleous Positive Tissue (weak)	26.3884
	% nucleous Positive Tissue (moderate)	12.9819		% nucleous Positive Tissue (moderate)	9.23046		% nucleous Positive Tissue (moderate)	10.5544		% nucleous Positive Tissue (moderate)	12.6189		% nucleous Positive Tissue (moderate)	12.4019		% nucleous Positive Tissue (moderate)	12.0291		% nucleous Positive Tissue (moderate)	13.4921		% nucleous Positive Tissue (moderate)	15.3886
	% nucleous Positive Tissue (strong)	27.247		% nucleous Positive Tissue (strong)	19.211		% nucleous Positive Tissue (strong)	21.0947		% nucleous Positive Tissue (strong)	25.0971		% nucleous Positive Tissue (strong)	27.4606		% nucleous Positive Tissue (strong)	24.6024		% nucleous Positive Tissue (strong)	27.5363		% nucleous Positive Tissue (strong)	28.9644
	% cd31 Positive Tissue	5.89305		% cd31 Positive Tissue	9.03812		% cd31 Positive Tissue	6.42403		% cd31 Positive Tissue	7.36198		% cd31 Positive Tissue	8.14059		% cd31 Positive Tissue	8.36473		% cd31 Positive Tissue	6.12599		% cd31 Positive Tissue	9.54307
	% cd31 Positive Tissue (weak)	1.72254		% cd31 Positive Tissue (weak)	1.99134		% cd31 Positive Tissue (weak)	1.66316		% cd31 Positive Tissue (weak)	1.80465		% cd31 Positive Tissue (weak)	2.05072		% cd31 Positive Tissue (weak)	1.93282		% cd31 Positive Tissue (weak)	1.65012		% cd31 Positive Tissue (weak)	2.29478
	% cd31 Positive Tissue (moderate)	1.721		% cd31 Positive Tissue (moderate)	2.2864		% cd31 Positive Tissue (moderate)	1.76541		% cd31 Positive Tissue (moderate)	1.96465		% cd31 Positive Tissue (moderate)	2.21443		% cd31 Positive Tissue (moderate)	2.17758		% cd31 Positive Tissue (moderate)	1.67586		% cd31 Positive Tissue (moderate)	2.50381
	% cd31 Positive Tissue (strong)	2.44951		% cd31 Positive Tissue (strong)	4.76038		% cd31 Positive Tissue (strong)	2.99547		% cd31 Positive Tissue (strong)	3.59268		% cd31 Positive Tissue (strong)	3.87543		% cd31 Positive Tissue (strong)	4.25434		% cd31 Positive Tissue (strong)	2.80001		% cd31 Positive Tissue (strong)	4.74448
	nucleous Average Positive Optical Density	0.35642		nucleous Average Positive Optical Density	0.348569		nucleous Average Positive Optical Density	0.3414		nucleous Average Positive Optical Density	0.344012		nucleous Average Positive Optical Density	0.363012		nucleous Average Positive Optical Density	0.361788		nucleous Average Positive Optical Density	0.342356		nucleous Average Positive Optical Density	0.37952
	cd31 Average Positive Optical Density	0.655018		cd31 Average Positive Optical Density	0.724952		cd31 Average Positive Optical Density	0.683725		cd31 Average Positive Optical Density	0.704377		cd31 Average Positive Optical Density	0.6956		cd31 Average Positive Optical Density	0.709016		cd31 Average Positive Optical Density	0.686322		cd31 Average Positive Optical Density	0.711013
	% Negative Tissue	27.3345		% Negative Tissue	43.4521		% Negative Tissue	37.7094		% Negative Tissue	27.9788		% Negative Tissue	25.8238		% Negative Tissue	32.0966		% Negative Tissue	21.0879		% Negative Tissue	23.1976
	tumour: Tissue Area Analyzed (μm²)	972473		tumour: Tissue Area Analyzed (μm²)	702714		tumour: Tissue Area Analyzed (μm²)	1.18275e+06		tumour: Tissue Area Analyzed (μm²)	580015		tumour: Tissue Area Analyzed (μm²)	512797		tumour: Tissue Area Analyzed (μm²)	824563		tumour: Tissue Area Analyzed (μm²)	742074		tumour: Tissue Area Analyzed (μm²)	422681
	tumour: nucleous Area (μm²)	671974		tumour: nucleous Area (μm²)	353791		tumour: nucleous Area (μm²)	686655		tumour: nucleous Area (μm²)	390950		tumour: nucleous Area (μm²)	353145		tumour: nucleous Area (μm²)	513894		tumour: nucleous Area (μm²)	557073		tumour: nucleous Area (μm²)	299010
	tumour: nucleous Weak Area (μm²)	280759		tumour: nucleous Weak Area (μm²)	153929		tumour: nucleous Weak Area (μm²)	312325		tumour: nucleous Weak Area (μm²)	172192		tumour: nucleous Weak Area (μm²)	148731		tumour: nucleous Weak Area (μm²)	211844		tumour: nucleous Weak Area (μm²)	252612		tumour: nucleous Weak Area (μm²)	111539
	tumour: nucleous Moderate Area (μm²)	126245		tumour: nucleous Moderate Area (μm²)	64863.7		tumour: nucleous Moderate Area (μm²)	124832		tumour: nucleous Moderate Area (μm²)	73191.7		tumour: nucleous Moderate Area (μm²)	63596.6		tumour: nucleous Moderate Area (μm²)	99187.9		tumour: nucleous Moderate Area (μm²)	100121		tumour: nucleous Moderate Area (μm²)	65044.6
	tumour: nucleous Strong Area (μm²)	264970		tumour: nucleous Strong Area (μm²)	134998		tumour: nucleous Strong Area (μm²)	249498		tumour: nucleous Strong Area (μm²)	145567		tumour: nucleous Strong Area (μm²)	140817		tumour: nucleous Strong Area (μm²)	202862		tumour: nucleous Strong Area (μm²)	204340		tumour: nucleous Strong Area (μm²)	122427
	tumour: cd31 Area (μm²)	57308.3		tumour: cd31 Area (μm²)	63512.1		tumour: cd31 Area (μm²)	75980.1		tumour: cd31 Area (μm²)	42700.6		tumour: cd31 Area (μm²)	41744.7		tumour: cd31 Area (μm²)	68972.5		tumour: cd31 Area (μm²)	45459.4		tumour: cd31 Area (μm²)	40336.7
	tumour: cd31 Weak Area (μm²)	16751.2		tumour: cd31 Weak Area (μm²)	13993.4		tumour: cd31 Weak Area (μm²)	19670.9		tumour: cd31 Weak Area (μm²)	10467.2		tumour: cd31 Weak Area (μm²)	10516.1		tumour: cd31 Weak Area (μm²)	15937.3		tumour: cd31 Weak Area (μm²)	12245.1		tumour: cd31 Weak Area (μm²)	9699.61
	tumour: cd31 Moderate Area (μm²)	16736.3		tumour: cd31 Moderate Area (μm²)	16066.8		tumour: cd31 Moderate Area (μm²)	20880.3		tumour: cd31 Moderate Area (μm²)	11395.3		tumour: cd31 Moderate Area (μm²)	11355.5		tumour: cd31 Moderate Area (μm²)	17955.5		tumour: cd31 Moderate Area (μm²)	12436.2		tumour: cd31 Moderate Area (μm²)	10583.1
	tumour: cd31 Strong Area (μm²)	23820.8		tumour: cd31 Strong Area (μm²)	33451.8		tumour: cd31 Strong Area (μm²)	35428.9		tumour: cd31 Strong Area (μm²)	20838.1		tumour: cd31 Strong Area (μm²)	19873.1		tumour: cd31 Strong Area (μm²)	35079.7		tumour: cd31 Strong Area (μm²)	20778.1		tumour: cd31 Strong Area (μm²)	20054
	tumour: % nucleous Positive Tissue	69.0996		tumour: % nucleous Positive Tissue	50.3463		tumour: % nucleous Positive Tissue	58.0559		tumour: % nucleous Positive Tissue	67.4035		tumour: % nucleous Positive Tissue	68.8664		tumour: % nucleous Positive Tissue	62.3232		tumour: % nucleous Positive Tissue	75.0697		tumour: % nucleous Positive Tissue	70.7414
	tumour: % nucleous Positive Tissue (weak)	28.8707		tumour: % nucleous Positive Tissue (weak)	21.9049		tumour: % nucleous Positive Tissue (weak)	26.4068		tumour: % nucleous Positive Tissue (weak)	29.6874		tumour: % nucleous Positive Tissue (weak)	29.0038		tumour: % nucleous Positive Tissue (weak)	25.6917		tumour: % nucleous Positive Tissue (weak)	34.0413		tumour: % nucleous Positive Tissue (weak)	26.3884
	tumour: % nucleous Positive Tissue (moderate)	12.9819		tumour: % nucleous Positive Tissue (moderate)	9.23046		tumour: % nucleous Positive Tissue (moderate)	10.5544		tumour: % nucleous Positive Tissue (moderate)	12.6189		tumour: % nucleous Positive Tissue (moderate)	12.4019		tumour: % nucleous Positive Tissue (moderate)	12.0291		tumour: % nucleous Positive Tissue (moderate)	13.4921		tumour: % nucleous Positive Tissue (moderate)	15.3886
	tumour: % nucleous Positive Tissue (strong)	27.247		tumour: % nucleous Positive Tissue (strong)	19.211		tumour: % nucleous Positive Tissue (strong)	21.0947		tumour: % nucleous Positive Tissue (strong)	25.0971		tumour: % nucleous Positive Tissue (strong)	27.4606		tumour: % nucleous Positive Tissue (strong)	24.6024		tumour: % nucleous Positive Tissue (strong)	27.5363		tumour: % nucleous Positive Tissue (strong)	28.9644
	tumour: % cd31 Positive Tissue	5.89305		tumour: % cd31 Positive Tissue	9.03812		tumour: % cd31 Positive Tissue	6.42403		tumour: % cd31 Positive Tissue	7.36198		tumour: % cd31 Positive Tissue	8.14059		tumour: % cd31 Positive Tissue	8.36473		tumour: % cd31 Positive Tissue	6.12599		tumour: % cd31 Positive Tissue	9.54307		7.61145
	tumour: % cd31 Positive Tissue (weak)	1.72254		tumour: % cd31 Positive Tissue (weak)	1.99134		tumour: % cd31 Positive Tissue (weak)	1.66316		tumour: % cd31 Positive Tissue (weak)	1.80465		tumour: % cd31 Positive Tissue (weak)	2.05072		tumour: % cd31 Positive Tissue (weak)	1.93282		tumour: % cd31 Positive Tissue (weak)	1.65012		tumour: % cd31 Positive Tissue (weak)	2.29478
	tumour: % cd31 Positive Tissue (moderate)	1.721		tumour: % cd31 Positive Tissue (moderate)	2.2864		tumour: % cd31 Positive Tissue (moderate)	1.76541		tumour: % cd31 Positive Tissue (moderate)	1.96465		tumour: % cd31 Positive Tissue (moderate)	2.21443		tumour: % cd31 Positive Tissue (moderate)	2.17758		tumour: % cd31 Positive Tissue (moderate)	1.67586		tumour: % cd31 Positive Tissue (moderate)	2.50381
	tumour: % cd31 Positive Tissue (strong)	2.44951		tumour: % cd31 Positive Tissue (strong)	4.76038		tumour: % cd31 Positive Tissue (strong)	2.99547		tumour: % cd31 Positive Tissue (strong)	3.59268		tumour: % cd31 Positive Tissue (strong)	3.87543		tumour: % cd31 Positive Tissue (strong)	4.25434		tumour: % cd31 Positive Tissue (strong)	2.80001		tumour: % cd31 Positive Tissue (strong)	4.74448
	tumour: nucleous Average Positive Optical Density	0.35642		tumour: nucleous Average Positive Optical Density	0.348569		tumour: nucleous Average Positive Optical Density	0.3414		tumour: nucleous Average Positive Optical Density	0.344012		tumour: nucleous Average Positive Optical Density	0.363012		tumour: nucleous Average Positive Optical Density	0.361788		tumour: nucleous Average Positive Optical Density	0.342356		tumour: nucleous Average Positive Optical Density	0.37952
	tumour: cd31 Average Positive Optical Density	0.655018		tumour: cd31 Average Positive Optical Density	0.724952		tumour: cd31 Average Positive Optical Density	0.683725		tumour: cd31 Average Positive Optical Density	0.704377		tumour: cd31 Average Positive Optical Density	0.6956		tumour: cd31 Average Positive Optical Density	0.709016		tumour: cd31 Average Positive Optical Density	0.686322		tumour: cd31 Average Positive Optical Density	0.711013
	tumour: % Negative Tissue	27.3345		tumour: % Negative Tissue	43.4521		tumour: % Negative Tissue	37.7094		tumour: % Negative Tissue	27.9788		tumour: % Negative Tissue	25.8238		tumour: % Negative Tissue	32.0966		tumour: % Negative Tissue	21.0879		tumour: % Negative Tissue	23.1976
	BSNA7.2g	WT
	Name	Value		Name	Value		Name	Value		Name	Value		Name	Value		Name	Value		Name	Value		Name	Value
	Classified Area (mm²)	0.53951		Classified Area (mm²)	0.63561		Classified Area (mm²)	0.78887		Classified Area (mm²)	0.7032		Classified Area (mm²)	0.52739		Classified Area (mm²)	0.54071		Classified Area (mm²)	0.95785		Classified Area (mm²)	1.06028
	tumour Area (mm²)	0.53951		tumour Area (mm²)	0.63561		tumour Area (mm²)	0.78854		tumour Area (mm²)	0.7032		tumour Area (mm²)	0.52739		tumour Area (mm²)	0.53999		tumour Area (mm²)	0.95694		tumour Area (mm²)	1.06028
	Necrosis Area (mm²)	0		Necrosis Area (mm²)	0		Necrosis Area (mm²)	0		Necrosis Area (mm²)	0		Necrosis Area (mm²)	0		Necrosis Area (mm²)	0		Necrosis Area (mm²)	0		Necrosis Area (mm²)	0
	Empty Area (mm²)	0		Empty Area (mm²)	0		Empty Area (mm²)	0		Empty Area (mm²)	0		Empty Area (mm²)	0		Empty Area (mm²)	0		Empty Area (mm²)	0		Empty Area (mm²)	0
	Normal Area (mm²)	0		Normal Area (mm²)	0		Normal Area (mm²)	0.00034		Normal Area (mm²)	0		Normal Area (mm²)	0		Normal Area (mm²)	0.00072		Normal Area (mm²)	0.00091		Normal Area (mm²)	0
	Tissue Area Analyzed (μm²)	539002		Tissue Area Analyzed (μm²)	634614		Tissue Area Analyzed (μm²)	788030		Tissue Area Analyzed (μm²)	702837		Tissue Area Analyzed (μm²)	526072		Tissue Area Analyzed (μm²)	538699		Tissue Area Analyzed (μm²)	956732		Tissue Area Analyzed (μm²)	1.05784e+06
	nucleous Area (μm²)	432552		nucleous Area (μm²)	346607		nucleous Area (μm²)	707598		nucleous Area (μm²)	556626		nucleous Area (μm²)	342817		nucleous Area (μm²)	382912		nucleous Area (μm²)	817086		nucleous Area (μm²)	658370
	nucleous Weak Area (μm²)	164844		nucleous Weak Area (μm²)	138533		nucleous Weak Area (μm²)	227956		nucleous Weak Area (μm²)	259257		nucleous Weak Area (μm²)	150554		nucleous Weak Area (μm²)	166379		nucleous Weak Area (μm²)	303535		nucleous Weak Area (μm²)	270378
	nucleous Moderate Area (μm²)	88946.8		nucleous Moderate Area (μm²)	70364.1		nucleous Moderate Area (μm²)	157429		nucleous Moderate Area (μm²)	99125.9		nucleous Moderate Area (μm²)	69709.8		nucleous Moderate Area (μm²)	77719.8		nucleous Moderate Area (μm²)	166061		nucleous Moderate Area (μm²)	138669
	nucleous Strong Area (μm²)	178762		nucleous Strong Area (μm²)	137710		nucleous Strong Area (μm²)	322213		nucleous Strong Area (μm²)	198243		nucleous Strong Area (μm²)	122553		nucleous Strong Area (μm²)	138813		nucleous Strong Area (μm²)	347489		nucleous Strong Area (μm²)	249323
	cd31 Area (μm²)	6518.27		cd31 Area (μm²)	4956.95		cd31 Area (μm²)	6659.7		cd31 Area (μm²)	5645.14		cd31 Area (μm²)	8955.25		cd31 Area (μm²)	2920.74		cd31 Area (μm²)	9991.83		cd31 Area (μm²)	20502.6
	cd31 Weak Area (μm²)	2091.12		cd31 Weak Area (μm²)	1906.42		cd31 Weak Area (μm²)	2498.46		cd31 Weak Area (μm²)	1992.19		cd31 Weak Area (μm²)	2939.96		cd31 Weak Area (μm²)	1312.1		cd31 Weak Area (μm²)	3505.69		cd31 Weak Area (μm²)	6639.46
	cd31 Moderate Area (μm²)	1952.72		cd31 Moderate Area (μm²)	1511.22		cd31 Moderate Area (μm²)	2059.24		cd31 Moderate Area (μm²)	1792.82		cd31 Moderate Area (μm²)	2739.08		cd31 Moderate Area (μm²)	944.989		cd31 Moderate Area (μm²)	3035.6		cd31 Moderate Area (μm²)	6192.14
	cd31 Strong Area (μm²)	2474.43		cd31 Strong Area (μm²)	1539.31		cd31 Strong Area (μm²)	2102		cd31 Strong Area (μm²)	1860.12		cd31 Strong Area (μm²)	3276.21		cd31 Strong Area (μm²)	663.643		cd31 Strong Area (μm²)	3450.54		cd31 Strong Area (μm²)	7670.98
	% nucleous Positive Tissue	80.2507		% nucleous Positive Tissue	54.6169		% nucleous Positive Tissue	89.7933		% nucleous Positive Tissue	79.1971		% nucleous Positive Tissue	65.1653		% nucleous Positive Tissue	71.0808		% nucleous Positive Tissue	85.4038		% nucleous Positive Tissue	62.2369
	% nucleous Positive Tissue (weak)	30.5832		% nucleous Positive Tissue (weak)	21.8295		% nucleous Positive Tissue (weak)	28.9273		% nucleous Positive Tissue (weak)	36.8873		% nucleous Positive Tissue (weak)	28.6185		% nucleous Positive Tissue (weak)	30.8853		% nucleous Positive Tissue (weak)	31.7263		% nucleous Positive Tissue (weak)	25.5594
	% nucleous Positive Tissue (moderate)	16.5022		% nucleous Positive Tissue (moderate)	11.0877		% nucleous Positive Tissue (moderate)	19.9775		% nucleous Positive Tissue (moderate)	14.1037		% nucleous Positive Tissue (moderate)	13.251		% nucleous Positive Tissue (moderate)	14.4273		% nucleous Positive Tissue (moderate)	17.3571		% nucleous Positive Tissue (moderate)	13.1086
	% nucleous Positive Tissue (strong)	33.1653		% nucleous Positive Tissue (strong)	21.6998		% nucleous Positive Tissue (strong)	40.8885		% nucleous Positive Tissue (strong)	28.2061		% nucleous Positive Tissue (strong)	23.2958		% nucleous Positive Tissue (strong)	25.7682		% nucleous Positive Tissue (strong)	36.3204		% nucleous Positive Tissue (strong)	23.569
	% cd31 Positive Tissue	1.20932		% cd31 Positive Tissue	0.781097		% cd31 Positive Tissue	0.845108		% cd31 Positive Tissue	0.803193		% cd31 Positive Tissue	1.70229		% cd31 Positive Tissue	0.542183		% cd31 Positive Tissue	1.04437		% cd31 Positive Tissue	1.93815
	% cd31 Positive Tissue (weak)	0.387962		% cd31 Positive Tissue (weak)	0.300407		% cd31 Positive Tissue (weak)	0.317052		% cd31 Positive Tissue (weak)	0.28345		% cd31 Positive Tissue (weak)	0.558852		% cd31 Positive Tissue (weak)	0.243569		% cd31 Positive Tissue (weak)	0.366424		% cd31 Positive Tissue (weak)	0.627641
	% cd31 Positive Tissue (moderate)	0.362285		% cd31 Positive Tissue (moderate)	0.238133		% cd31 Positive Tissue (moderate)	0.261315		% cd31 Positive Tissue (moderate)	0.255084		% cd31 Positive Tissue (moderate)	0.520666		% cd31 Positive Tissue (moderate)	0.17542		% cd31 Positive Tissue (moderate)	0.317289		% cd31 Positive Tissue (moderate)	0.585355
	% cd31 Positive Tissue (strong)	0.459076		% cd31 Positive Tissue (strong)	0.242558		% cd31 Positive Tissue (strong)	0.266741		% cd31 Positive Tissue (strong)	0.264659		% cd31 Positive Tissue (strong)	0.622769		% cd31 Positive Tissue (strong)	0.123193		% cd31 Positive Tissue (strong)	0.360659		% cd31 Positive Tissue (strong)	0.725152
	nucleous Average Positive Optical Density	0.351082		nucleous Average Positive Optical Density	0.340882		nucleous Average Positive Optical Density	0.37485		nucleous Average Positive Optical Density	0.33847		nucleous Average Positive Optical Density	0.329482		nucleous Average Positive Optical Density	0.332484		nucleous Average Positive Optical Density	0.366005		nucleous Average Positive Optical Density	0.344831
	cd31 Average Positive Optical Density	0.636914		cd31 Average Positive Optical Density	0.600394		cd31 Average Positive Optical Density	0.602474		cd31 Average Positive Optical Density	0.610868		cd31 Average Positive Optical Density	0.624818		cd31 Average Positive Optical Density	0.553314		cd31 Average Positive Optical Density	0.613111		cd31 Average Positive Optical Density	0.630982
	% Negative Tissue	18.9106		% Negative Tissue	44.7139		% Negative Tissue	9.6117		% Negative Tissue	20.1693		% Negative Tissue	33.6618		% Negative Tissue	28.5242		% Negative Tissue	13.9493		% Negative Tissue	36.322
	tumour: Tissue Area Analyzed (μm²)	539002		tumour: Tissue Area Analyzed (μm²)	634614		tumour: Tissue Area Analyzed (μm²)	788030		tumour: Tissue Area Analyzed (μm²)	702837		tumour: Tissue Area Analyzed (μm²)	526072		tumour: Tissue Area Analyzed (μm²)	538699		tumour: Tissue Area Analyzed (μm²)	956732		tumour: Tissue Area Analyzed (μm²)	1.05784e+06
	tumour: nucleous Area (μm²)	432552		tumour: nucleous Area (μm²)	346607		tumour: nucleous Area (μm²)	707598		tumour: nucleous Area (μm²)	556626		tumour: nucleous Area (μm²)	342817		tumour: nucleous Area (μm²)	382912		tumour: nucleous Area (μm²)	817086		tumour: nucleous Area (μm²)	658370
	tumour: nucleous Weak Area (μm²)	164844		tumour: nucleous Weak Area (μm²)	138533		tumour: nucleous Weak Area (μm²)	227956		tumour: nucleous Weak Area (μm²)	259257		tumour: nucleous Weak Area (μm²)	150554		tumour: nucleous Weak Area (μm²)	166379		tumour: nucleous Weak Area (μm²)	303535		tumour: nucleous Weak Area (μm²)	270378
	tumour: nucleous Moderate Area (μm²)	88946.8		tumour: nucleous Moderate Area (μm²)	70364.1		tumour: nucleous Moderate Area (μm²)	157429		tumour: nucleous Moderate Area (μm²)	99125.9		tumour: nucleous Moderate Area (μm²)	69709.8		tumour: nucleous Moderate Area (μm²)	77719.8		tumour: nucleous Moderate Area (μm²)	166061		tumour: nucleous Moderate Area (μm²)	138669
	tumour: nucleous Strong Area (μm²)	178762		tumour: nucleous Strong Area (μm²)	137710		tumour: nucleous Strong Area (μm²)	322213		tumour: nucleous Strong Area (μm²)	198243		tumour: nucleous Strong Area (μm²)	122553		tumour: nucleous Strong Area (μm²)	138813		tumour: nucleous Strong Area (μm²)	347489		tumour: nucleous Strong Area (μm²)	249323
	tumour: cd31 Area (μm²)	6518.27		tumour: cd31 Area (μm²)	4956.95		tumour: cd31 Area (μm²)	6659.7		tumour: cd31 Area (μm²)	5645.14		tumour: cd31 Area (μm²)	8955.25		tumour: cd31 Area (μm²)	2920.74		tumour: cd31 Area (μm²)	9991.83		tumour: cd31 Area (μm²)	20502.6
	tumour: cd31 Weak Area (μm²)	2091.12		tumour: cd31 Weak Area (μm²)	1906.42		tumour: cd31 Weak Area (μm²)	2498.46		tumour: cd31 Weak Area (μm²)	1992.19		tumour: cd31 Weak Area (μm²)	2939.96		tumour: cd31 Weak Area (μm²)	1312.1		tumour: cd31 Weak Area (μm²)	3505.69		tumour: cd31 Weak Area (μm²)	6639.46
	tumour: cd31 Moderate Area (μm²)	1952.72		tumour: cd31 Moderate Area (μm²)	1511.22		tumour: cd31 Moderate Area (μm²)	2059.24		tumour: cd31 Moderate Area (μm²)	1792.82		tumour: cd31 Moderate Area (μm²)	2739.08		tumour: cd31 Moderate Area (μm²)	944.989		tumour: cd31 Moderate Area (μm²)	3035.6		tumour: cd31 Moderate Area (μm²)	6192.14
	tumour: cd31 Strong Area (μm²)	2474.43		tumour: cd31 Strong Area (μm²)	1539.31		tumour: cd31 Strong Area (μm²)	2102		tumour: cd31 Strong Area (μm²)	1860.12		tumour: cd31 Strong Area (μm²)	3276.21		tumour: cd31 Strong Area (μm²)	663.643		tumour: cd31 Strong Area (μm²)	3450.54		tumour: cd31 Strong Area (μm²)	7670.98
	tumour: % nucleous Positive Tissue	80.2507		tumour: % nucleous Positive Tissue	54.6169		tumour: % nucleous Positive Tissue	89.7933		tumour: % nucleous Positive Tissue	79.1971		tumour: % nucleous Positive Tissue	65.1653		tumour: % nucleous Positive Tissue	71.0808		tumour: % nucleous Positive Tissue	85.4038		tumour: % nucleous Positive Tissue	62.2369
	tumour: % nucleous Positive Tissue (weak)	30.5832		tumour: % nucleous Positive Tissue (weak)	21.8295		tumour: % nucleous Positive Tissue (weak)	28.9273		tumour: % nucleous Positive Tissue (weak)	36.8873		tumour: % nucleous Positive Tissue (weak)	28.6185		tumour: % nucleous Positive Tissue (weak)	30.8853		tumour: % nucleous Positive Tissue (weak)	31.7263		tumour: % nucleous Positive Tissue (weak)	25.5594
	tumour: % nucleous Positive Tissue (moderate)	16.5022		tumour: % nucleous Positive Tissue (moderate)	11.0877		tumour: % nucleous Positive Tissue (moderate)	19.9775		tumour: % nucleous Positive Tissue (moderate)	14.1037		tumour: % nucleous Positive Tissue (moderate)	13.251		tumour: % nucleous Positive Tissue (moderate)	14.4273		tumour: % nucleous Positive Tissue (moderate)	17.3571		tumour: % nucleous Positive Tissue (moderate)	13.1086
	tumour: % nucleous Positive Tissue (strong)	33.1653		tumour: % nucleous Positive Tissue (strong)	21.6998		tumour: % nucleous Positive Tissue (strong)	40.8885		tumour: % nucleous Positive Tissue (strong)	28.2061		tumour: % nucleous Positive Tissue (strong)	23.2958		tumour: % nucleous Positive Tissue (strong)	25.7682		tumour: % nucleous Positive Tissue (strong)	36.3204		tumour: % nucleous Positive Tissue (strong)	23.569
	tumour: % cd31 Positive Tissue	1.20932		tumour: % cd31 Positive Tissue	0.781097		tumour: % cd31 Positive Tissue	0.845108		tumour: % cd31 Positive Tissue	0.803193		tumour: % cd31 Positive Tissue	1.70229		tumour: % cd31 Positive Tissue	0.542183		tumour: % cd31 Positive Tissue	1.04437		tumour: % cd31 Positive Tissue	1.93815		1.10821
	tumour: % cd31 Positive Tissue (weak)	0.387962		tumour: % cd31 Positive Tissue (weak)	0.300407		tumour: % cd31 Positive Tissue (weak)	0.317052		tumour: % cd31 Positive Tissue (weak)	0.28345		tumour: % cd31 Positive Tissue (weak)	0.558852		tumour: % cd31 Positive Tissue (weak)	0.243569		tumour: % cd31 Positive Tissue (weak)	0.366424		tumour: % cd31 Positive Tissue (weak)	0.627641
	tumour: % cd31 Positive Tissue (moderate)	0.362285		tumour: % cd31 Positive Tissue (moderate)	0.238133		tumour: % cd31 Positive Tissue (moderate)	0.261315		tumour: % cd31 Positive Tissue (moderate)	0.255084		tumour: % cd31 Positive Tissue (moderate)	0.520666		tumour: % cd31 Positive Tissue (moderate)	0.17542		tumour: % cd31 Positive Tissue (moderate)	0.317289		tumour: % cd31 Positive Tissue (moderate)	0.585355
	tumour: % cd31 Positive Tissue (strong)	0.459076		tumour: % cd31 Positive Tissue (strong)	0.242558		tumour: % cd31 Positive Tissue (strong)	0.266741		tumour: % cd31 Positive Tissue (strong)	0.264659		tumour: % cd31 Positive Tissue (strong)	0.622769		tumour: % cd31 Positive Tissue (strong)	0.123193		tumour: % cd31 Positive Tissue (strong)	0.360659		tumour: % cd31 Positive Tissue (strong)	0.725152
	tumour: nucleous Average Positive Optical Density	0.351082		tumour: nucleous Average Positive Optical Density	0.340882		tumour: nucleous Average Positive Optical Density	0.37485		tumour: nucleous Average Positive Optical Density	0.33847		tumour: nucleous Average Positive Optical Density	0.329482		tumour: nucleous Average Positive Optical Density	0.332484		tumour: nucleous Average Positive Optical Density	0.366005		tumour: nucleous Average Positive Optical Density	0.344831
	tumour: cd31 Average Positive Optical Density	0.636914		tumour: cd31 Average Positive Optical Density	0.600394		tumour: cd31 Average Positive Optical Density	0.602474		tumour: cd31 Average Positive Optical Density	0.610868		tumour: cd31 Average Positive Optical Density	0.624818		tumour: cd31 Average Positive Optical Density	0.553314		tumour: cd31 Average Positive Optical Density	0.613111		tumour: cd31 Average Positive Optical Density	0.630982
	tumour: % Negative Tissue	18.9106		tumour: % Negative Tissue	44.7139		tumour: % Negative Tissue	9.6117		tumour: % Negative Tissue	20.1693		tumour: % Negative Tissue	33.6618		tumour: % Negative Tissue	28.5242		tumour: % Negative Tissue	13.9493		tumour: % Negative Tissue	36.322
	BSNA1.2a	WT
	Name	Value		Name	Value		Name	Value		Name	Value		Name	Value		Name	Value		Name	Value		Name	Value
	Classified Area (mm²)	0.60852		Classified Area (mm²)	0.85287		Classified Area (mm²)	1.06717		Classified Area (mm²)	0.76755		Classified Area (mm²)	0.99833		Classified Area (mm²)	0.78101		Classified Area (mm²)	0.69509		Classified Area (mm²)	0.77686
	tumour Area (mm²)	0.60708		tumour Area (mm²)	0.85266		tumour Area (mm²)	1.05589		tumour Area (mm²)	0.75329		tumour Area (mm²)	0.98214		tumour Area (mm²)	0.77438		tumour Area (mm²)	0.69455		tumour Area (mm²)	0.75196
	Necrosis Area (mm²)	0		Necrosis Area (mm²)	0		Necrosis Area (mm²)	5e-05		Necrosis Area (mm²)	0.00029		Necrosis Area (mm²)	0.00011		Necrosis Area (mm²)	0.00013		Necrosis Area (mm²)	0		Necrosis Area (mm²)	0.00509
	Empty Area (mm²)	0.00144		Empty Area (mm²)	0.00018		Empty Area (mm²)	0.01123		Empty Area (mm²)	0.01397		Empty Area (mm²)	0.01608		Empty Area (mm²)	0.0065		Empty Area (mm²)	0.00054		Empty Area (mm²)	0.0198
	Normal Area (mm²)	0		Normal Area (mm²)	3e-05		Normal Area (mm²)	0		Normal Area (mm²)	0		Normal Area (mm²)	0		Normal Area (mm²)	0		Normal Area (mm²)	0		Normal Area (mm²)	0
	Tissue Area Analyzed (μm²)	599037		Tissue Area Analyzed (μm²)	849616		Tissue Area Analyzed (μm²)	1.0211e+06		Tissue Area Analyzed (μm²)	723933		Tissue Area Analyzed (μm²)	945704		Tissue Area Analyzed (μm²)	753555		Tissue Area Analyzed (μm²)	690578		Tissue Area Analyzed (μm²)	564747
	nucleous Area (μm²)	265140		nucleous Area (μm²)	386187		nucleous Area (μm²)	388318		nucleous Area (μm²)	281477		nucleous Area (μm²)	368698		nucleous Area (μm²)	363985		nucleous Area (μm²)	310982		nucleous Area (μm²)	238986
	nucleous Weak Area (μm²)	86624.7		nucleous Weak Area (μm²)	133987		nucleous Weak Area (μm²)	141487		nucleous Weak Area (μm²)	103498		nucleous Weak Area (μm²)	130910		nucleous Weak Area (μm²)	115418		nucleous Weak Area (μm²)	117435		nucleous Weak Area (μm²)	68902.2
	nucleous Moderate Area (μm²)	60904.3		nucleous Moderate Area (μm²)	91353.2		nucleous Moderate Area (μm²)	97837.1		nucleous Moderate Area (μm²)	73507.2		nucleous Moderate Area (μm²)	85647.3		nucleous Moderate Area (μm²)	82882.7		nucleous Moderate Area (μm²)	75190.2		nucleous Moderate Area (μm²)	49728.9
	nucleous Strong Area (μm²)	117610		nucleous Strong Area (μm²)	160847		nucleous Strong Area (μm²)	148993		nucleous Strong Area (μm²)	104471		nucleous Strong Area (μm²)	152141		nucleous Strong Area (μm²)	165684		nucleous Strong Area (μm²)	118357		nucleous Strong Area (μm²)	120355
	cd31 Area (μm²)	13943.8		cd31 Area (μm²)	28713.5		cd31 Area (μm²)	27286		cd31 Area (μm²)	12301		cd31 Area (μm²)	18316.8		cd31 Area (μm²)	11360.9		cd31 Area (μm²)	12348.4		cd31 Area (μm²)	4563.52
	cd31 Weak Area (μm²)	4942.53		cd31 Weak Area (μm²)	8332.6		cd31 Weak Area (μm²)	8783.46		cd31 Weak Area (μm²)	4033.98		cd31 Weak Area (μm²)	6803.16		cd31 Weak Area (μm²)	4613.87		cd31 Weak Area (μm²)	4778.58		cd31 Weak Area (μm²)	2503.02
	cd31 Moderate Area (μm²)	4368.96		cd31 Moderate Area (μm²)	8323.49		cd31 Moderate Area (μm²)	7977.37		cd31 Moderate Area (μm²)	3689.63		cd31 Moderate Area (μm²)	5853.11		cd31 Moderate Area (μm²)	3744.79		cd31 Moderate Area (μm²)	3949.98		cd31 Moderate Area (μm²)	1386.49
	cd31 Strong Area (μm²)	4632.34		cd31 Strong Area (μm²)	12057.4		cd31 Strong Area (μm²)	10525.2		cd31 Strong Area (μm²)	4577.44		cd31 Strong Area (μm²)	5660.57		cd31 Strong Area (μm²)	3002.2		cd31 Strong Area (μm²)	3619.8		cd31 Strong Area (μm²)	674.016
	% nucleous Positive Tissue	44.2609		% nucleous Positive Tissue	45.4543		% nucleous Positive Tissue	38.0295		% nucleous Positive Tissue	38.8816		% nucleous Positive Tissue	38.9866		% nucleous Positive Tissue	48.3024		% nucleous Positive Tissue	45.0321		% nucleous Positive Tissue	42.3174
	% nucleous Positive Tissue (weak)	14.4607		% nucleous Positive Tissue (weak)	15.7703		% nucleous Positive Tissue (weak)	13.8564		% nucleous Positive Tissue (weak)	14.2967		% nucleous Positive Tissue (weak)	13.8426		% nucleous Positive Tissue (weak)	15.3164		% nucleous Positive Tissue (weak)	17.0053		% nucleous Positive Tissue (weak)	12.2005
	% nucleous Positive Tissue (moderate)	10.167		% nucleous Positive Tissue (moderate)	10.7523		% nucleous Positive Tissue (moderate)	9.58158		% nucleous Positive Tissue (moderate)	10.1539		% nucleous Positive Tissue (moderate)	9.05646		% nucleous Positive Tissue (moderate)	10.9989		% nucleous Positive Tissue (moderate)	10.888		% nucleous Positive Tissue (moderate)	8.80553
	% nucleous Positive Tissue (strong)	19.6332		% nucleous Positive Tissue (strong)	18.9318		% nucleous Positive Tissue (strong)	14.5915		% nucleous Positive Tissue (strong)	14.431		% nucleous Positive Tissue (strong)	16.0875		% nucleous Positive Tissue (strong)	21.987		% nucleous Positive Tissue (strong)	17.1388		% nucleous Positive Tissue (strong)	21.3113
	% cd31 Positive Tissue	2.32771		% cd31 Positive Tissue	3.37959		% cd31 Positive Tissue	2.67223		% cd31 Positive Tissue	1.6992		% cd31 Positive Tissue	1.93685		% cd31 Positive Tissue	1.50764		% cd31 Positive Tissue	1.78812		% cd31 Positive Tissue	0.808066
	% cd31 Positive Tissue (weak)	0.825079		% cd31 Positive Tissue (weak)	0.980749		% cd31 Positive Tissue (weak)	0.8602		% cd31 Positive Tissue (weak)	0.557231		% cd31 Positive Tissue (weak)	0.719375		% cd31 Positive Tissue (weak)	0.612281		% cd31 Positive Tissue (weak)	0.691968		% cd31 Positive Tissue (weak)	0.443211
	% cd31 Positive Tissue (moderate)	0.72933		% cd31 Positive Tissue (moderate)	0.979677		% cd31 Positive Tissue (moderate)	0.781256		% cd31 Positive Tissue (moderate)	0.509665		% cd31 Positive Tissue (moderate)	0.618915		% cd31 Positive Tissue (moderate)	0.496949		% cd31 Positive Tissue (moderate)	0.571981		% cd31 Positive Tissue (moderate)	0.245506
	% cd31 Positive Tissue (strong)	0.773298		% cd31 Positive Tissue (strong)	1.41916		% cd31 Positive Tissue (strong)	1.03077		% cd31 Positive Tissue (strong)	0.632302		% cd31 Positive Tissue (strong)	0.598556		% cd31 Positive Tissue (strong)	0.398406		% cd31 Positive Tissue (strong)	0.524169		% cd31 Positive Tissue (strong)	0.119348
	nucleous Average Positive Optical Density	0.366853		nucleous Average Positive Optical Density	0.354027		nucleous Average Positive Optical Density	0.33664		nucleous Average Positive Optical Density	0.32929		nucleous Average Positive Optical Density	0.349638		nucleous Average Positive Optical Density	0.365418		nucleous Average Positive Optical Density	0.337975		nucleous Average Positive Optical Density	0.396532
	cd31 Average Positive Optical Density	0.613175		cd31 Average Positive Optical Density	0.656755		cd31 Average Positive Optical Density	0.640059		cd31 Average Positive Optical Density	0.632807		cd31 Average Positive Optical Density	0.594752		cd31 Average Positive Optical Density	0.578461		cd31 Average Positive Optical Density	0.587589		cd31 Average Positive Optical Density	0.521147
	% Negative Tissue	53.7253		% Negative Tissue	51.7265		% Negative Tissue	59.8572		% Negative Tissue	59.6901		% Negative Tissue	59.4883		% Negative Tissue	50.4397		% Negative Tissue	53.5649		% Negative Tissue	56.972
	tumour: Tissue Area Analyzed (μm²)	599037		tumour: Tissue Area Analyzed (μm²)	849616		tumour: Tissue Area Analyzed (μm²)	1.0211e+06		tumour: Tissue Area Analyzed (μm²)	723933		tumour: Tissue Area Analyzed (μm²)	945704		tumour: Tissue Area Analyzed (μm²)	753555		tumour: Tissue Area Analyzed (μm²)	690578		tumour: Tissue Area Analyzed (μm²)	564747
	tumour: nucleous Area (μm²)	265140		tumour: nucleous Area (μm²)	386187		tumour: nucleous Area (μm²)	388318		tumour: nucleous Area (μm²)	281477		tumour: nucleous Area (μm²)	368698		tumour: nucleous Area (μm²)	363985		tumour: nucleous Area (μm²)	310982		tumour: nucleous Area (μm²)	238986
	tumour: nucleous Weak Area (μm²)	86624.7		tumour: nucleous Weak Area (μm²)	133987		tumour: nucleous Weak Area (μm²)	141487		tumour: nucleous Weak Area (μm²)	103498		tumour: nucleous Weak Area (μm²)	130910		tumour: nucleous Weak Area (μm²)	115418		tumour: nucleous Weak Area (μm²)	117435		tumour: nucleous Weak Area (μm²)	68902.2
	tumour: nucleous Moderate Area (μm²)	60904.3		tumour: nucleous Moderate Area (μm²)	91353.2		tumour: nucleous Moderate Area (μm²)	97837.1		tumour: nucleous Moderate Area (μm²)	73507.2		tumour: nucleous Moderate Area (μm²)	85647.3		tumour: nucleous Moderate Area (μm²)	82882.7		tumour: nucleous Moderate Area (μm²)	75190.2		tumour: nucleous Moderate Area (μm²)	49728.9
	tumour: nucleous Strong Area (μm²)	117610		tumour: nucleous Strong Area (μm²)	160847		tumour: nucleous Strong Area (μm²)	148993		tumour: nucleous Strong Area (μm²)	104471		tumour: nucleous Strong Area (μm²)	152141		tumour: nucleous Strong Area (μm²)	165684		tumour: nucleous Strong Area (μm²)	118357		tumour: nucleous Strong Area (μm²)	120355
	tumour: cd31 Area (μm²)	13943.8		tumour: cd31 Area (μm²)	28713.5		tumour: cd31 Area (μm²)	27286		tumour: cd31 Area (μm²)	12301		tumour: cd31 Area (μm²)	18316.8		tumour: cd31 Area (μm²)	11360.9		tumour: cd31 Area (μm²)	12348.4		tumour: cd31 Area (μm²)	4563.52
	tumour: cd31 Weak Area (μm²)	4942.53		tumour: cd31 Weak Area (μm²)	8332.6		tumour: cd31 Weak Area (μm²)	8783.46		tumour: cd31 Weak Area (μm²)	4033.98		tumour: cd31 Weak Area (μm²)	6803.16		tumour: cd31 Weak Area (μm²)	4613.87		tumour: cd31 Weak Area (μm²)	4778.58		tumour: cd31 Weak Area (μm²)	2503.02
	tumour: cd31 Moderate Area (μm²)	4368.96		tumour: cd31 Moderate Area (μm²)	8323.49		tumour: cd31 Moderate Area (μm²)	7977.37		tumour: cd31 Moderate Area (μm²)	3689.63		tumour: cd31 Moderate Area (μm²)	5853.11		tumour: cd31 Moderate Area (μm²)	3744.79		tumour: cd31 Moderate Area (μm²)	3949.98		tumour: cd31 Moderate Area (μm²)	1386.49
	tumour: cd31 Strong Area (μm²)	4632.34		tumour: cd31 Strong Area (μm²)	12057.4		tumour: cd31 Strong Area (μm²)	10525.2		tumour: cd31 Strong Area (μm²)	4577.44		tumour: cd31 Strong Area (μm²)	5660.57		tumour: cd31 Strong Area (μm²)	3002.2		tumour: cd31 Strong Area (μm²)	3619.8		tumour: cd31 Strong Area (μm²)	674.016
	tumour: % nucleous Positive Tissue	44.2609		tumour: % nucleous Positive Tissue	45.4543		tumour: % nucleous Positive Tissue	38.0295		tumour: % nucleous Positive Tissue	38.8816		tumour: % nucleous Positive Tissue	38.9866		tumour: % nucleous Positive Tissue	48.3024		tumour: % nucleous Positive Tissue	45.0321		tumour: % nucleous Positive Tissue	42.3174
	tumour: % nucleous Positive Tissue (weak)	14.4607		tumour: % nucleous Positive Tissue (weak)	15.7703		tumour: % nucleous Positive Tissue (weak)	13.8564		tumour: % nucleous Positive Tissue (weak)	14.2967		tumour: % nucleous Positive Tissue (weak)	13.8426		tumour: % nucleous Positive Tissue (weak)	15.3164		tumour: % nucleous Positive Tissue (weak)	17.0053		tumour: % nucleous Positive Tissue (weak)	12.2005
	tumour: % nucleous Positive Tissue (moderate)	10.167		tumour: % nucleous Positive Tissue (moderate)	10.7523		tumour: % nucleous Positive Tissue (moderate)	9.58158		tumour: % nucleous Positive Tissue (moderate)	10.1539		tumour: % nucleous Positive Tissue (moderate)	9.05646		tumour: % nucleous Positive Tissue (moderate)	10.9989		tumour: % nucleous Positive Tissue (moderate)	10.888		tumour: % nucleous Positive Tissue (moderate)	8.80553
	tumour: % nucleous Positive Tissue (strong)	19.6332		tumour: % nucleous Positive Tissue (strong)	18.9318		tumour: % nucleous Positive Tissue (strong)	14.5915		tumour: % nucleous Positive Tissue (strong)	14.431		tumour: % nucleous Positive Tissue (strong)	16.0875		tumour: % nucleous Positive Tissue (strong)	21.987		tumour: % nucleous Positive Tissue (strong)	17.1388		tumour: % nucleous Positive Tissue (strong)	21.3113
	tumour: % cd31 Positive Tissue	2.32771		tumour: % cd31 Positive Tissue	3.37959		tumour: % cd31 Positive Tissue	2.67223		tumour: % cd31 Positive Tissue	1.6992		tumour: % cd31 Positive Tissue	1.93685		tumour: % cd31 Positive Tissue	1.50764		tumour: % cd31 Positive Tissue	1.78812		tumour: % cd31 Positive Tissue	0.808066		2.01492
	tumour: % cd31 Positive Tissue (weak)	0.825079		tumour: % cd31 Positive Tissue (weak)	0.980749		tumour: % cd31 Positive Tissue (weak)	0.8602		tumour: % cd31 Positive Tissue (weak)	0.557231		tumour: % cd31 Positive Tissue (weak)	0.719375		tumour: % cd31 Positive Tissue (weak)	0.612281		tumour: % cd31 Positive Tissue (weak)	0.691968		tumour: % cd31 Positive Tissue (weak)	0.443211
	tumour: % cd31 Positive Tissue (moderate)	0.72933		tumour: % cd31 Positive Tissue (moderate)	0.979677		tumour: % cd31 Positive Tissue (moderate)	0.781256		tumour: % cd31 Positive Tissue (moderate)	0.509665		tumour: % cd31 Positive Tissue (moderate)	0.618915		tumour: % cd31 Positive Tissue (moderate)	0.496949		tumour: % cd31 Positive Tissue (moderate)	0.571981		tumour: % cd31 Positive Tissue (moderate)	0.245506
	tumour: % cd31 Positive Tissue (strong)	0.773298		tumour: % cd31 Positive Tissue (strong)	1.41916		tumour: % cd31 Positive Tissue (strong)	1.03077		tumour: % cd31 Positive Tissue (strong)	0.632302		tumour: % cd31 Positive Tissue (strong)	0.598556		tumour: % cd31 Positive Tissue (strong)	0.398406		tumour: % cd31 Positive Tissue (strong)	0.524169		tumour: % cd31 Positive Tissue (strong)	0.119348
	tumour: nucleous Average Positive Optical Density	0.366853		tumour: nucleous Average Positive Optical Density	0.354027		tumour: nucleous Average Positive Optical Density	0.33664		tumour: nucleous Average Positive Optical Density	0.32929		tumour: nucleous Average Positive Optical Density	0.349638		tumour: nucleous Average Positive Optical Density	0.365418		tumour: nucleous Average Positive Optical Density	0.337975		tumour: nucleous Average Positive Optical Density	0.396532
	tumour: cd31 Average Positive Optical Density	0.613175		tumour: cd31 Average Positive Optical Density	0.656755		tumour: cd31 Average Positive Optical Density	0.640059		tumour: cd31 Average Positive Optical Density	0.632807		tumour: cd31 Average Positive Optical Density	0.594752		tumour: cd31 Average Positive Optical Density	0.578461		tumour: cd31 Average Positive Optical Density	0.587589		tumour: cd31 Average Positive Optical Density	0.521147
	tumour: % Negative Tissue	53.7253		tumour: % Negative Tissue	51.7265		tumour: % Negative Tissue	59.8572		tumour: % Negative Tissue	59.6901		tumour: % Negative Tissue	59.4883		tumour: % Negative Tissue	50.4397		tumour: % Negative Tissue	53.5649		tumour: % Negative Tissue	56.972
	BSNA34.2c	WT
	Name	Value		Name	Value		Name	Value		Name	Value		Name	Value		Name	Value		Name	Value		Name	Value
	Classified Area (mm²)	0.51807		Classified Area (mm²)	0.47062		Classified Area (mm²)	0.80419		Classified Area (mm²)	0.85041		Classified Area (mm²)	0.59718		Classified Area (mm²)	0.61607		Classified Area (mm²)	0.55199		Classified Area (mm²)	0.94218
	tumour Area (mm²)	0.48875		tumour Area (mm²)	0.47062		tumour Area (mm²)	0.80419		tumour Area (mm²)	0.84988		tumour Area (mm²)	0.59393		tumour Area (mm²)	0.61413		tumour Area (mm²)	0.55195		tumour Area (mm²)	0.94218
	Necrosis Area (mm²)	0.00098		Necrosis Area (mm²)	0		Necrosis Area (mm²)	0		Necrosis Area (mm²)	0		Necrosis Area (mm²)	0		Necrosis Area (mm²)	0		Necrosis Area (mm²)	0		Necrosis Area (mm²)	0
	Empty Area (mm²)	0.02826		Empty Area (mm²)	0		Empty Area (mm²)	0		Empty Area (mm²)	0.00053		Empty Area (mm²)	0.00287		Empty Area (mm²)	0.00144		Empty Area (mm²)	3e-05		Empty Area (mm²)	0
	Normal Area (mm²)	8e-05		Normal Area (mm²)	0		Normal Area (mm²)	0		Normal Area (mm²)	0		Normal Area (mm²)	0.00038		Normal Area (mm²)	0.0005		Normal Area (mm²)	0		Normal Area (mm²)	0
	Tissue Area Analyzed (μm²)	452987		Tissue Area Analyzed (μm²)	468514		Tissue Area Analyzed (μm²)	802458		Tissue Area Analyzed (μm²)	848454		Tissue Area Analyzed (μm²)	589344		Tissue Area Analyzed (μm²)	605296		Tissue Area Analyzed (μm²)	550070		Tissue Area Analyzed (μm²)	940071
	nucleous Area (μm²)	173716		nucleous Area (μm²)	239667		nucleous Area (μm²)	352539		nucleous Area (μm²)	422962		nucleous Area (μm²)	370383		nucleous Area (μm²)	376172		nucleous Area (μm²)	226058		nucleous Area (μm²)	490436
	nucleous Weak Area (μm²)	66996		nucleous Weak Area (μm²)	81639.7		nucleous Weak Area (μm²)	138232		nucleous Weak Area (μm²)	135603		nucleous Weak Area (μm²)	128847		nucleous Weak Area (μm²)	130031		nucleous Weak Area (μm²)	89122.2		nucleous Weak Area (μm²)	167906
	nucleous Moderate Area (μm²)	35927.3		nucleous Moderate Area (μm²)	51074.2		nucleous Moderate Area (μm²)	86685.7		nucleous Moderate Area (μm²)	96868.8		nucleous Moderate Area (μm²)	80634.7		nucleous Moderate Area (μm²)	81285.5		nucleous Moderate Area (μm²)	54046.8		nucleous Moderate Area (μm²)	108480
	nucleous Strong Area (μm²)	70792.7		nucleous Strong Area (μm²)	106953		nucleous Strong Area (μm²)	127621		nucleous Strong Area (μm²)	190491		nucleous Strong Area (μm²)	160902		nucleous Strong Area (μm²)	164855		nucleous Strong Area (μm²)	82888.8		nucleous Strong Area (μm²)	214050
	cd31 Area (μm²)	13987.1		cd31 Area (μm²)	9383.34		cd31 Area (μm²)	17671.4		cd31 Area (μm²)	14610.8		cd31 Area (μm²)	5844.76		cd31 Area (μm²)	11611.8		cd31 Area (μm²)	9276.83		cd31 Area (μm²)	14973.8
	cd31 Weak Area (μm²)	4611.6		cd31 Weak Area (μm²)	3182.85		cd31 Weak Area (μm²)	6171.9		cd31 Weak Area (μm²)	5097.63		cd31 Weak Area (μm²)	2842.81		cd31 Weak Area (μm²)	3897.35		cd31 Weak Area (μm²)	3481.91		cd31 Weak Area (μm²)	4512.16
	cd31 Moderate Area (μm²)	4120.5		cd31 Moderate Area (μm²)	2978.68		cd31 Moderate Area (μm²)	5657.79		cd31 Moderate Area (μm²)	4536.7		cd31 Moderate Area (μm²)	1862.4		cd31 Moderate Area (μm²)	3459.65		cd31 Moderate Area (μm²)	2891.13		cd31 Moderate Area (μm²)	4531.14
	cd31 Strong Area (μm²)	5255		cd31 Strong Area (μm²)	3221.82		cd31 Strong Area (μm²)	5841.72		cd31 Strong Area (μm²)	4976.43		cd31 Strong Area (μm²)	1139.55		cd31 Strong Area (μm²)	4254.85		cd31 Strong Area (μm²)	2903.78		cd31 Strong Area (μm²)	5930.53
	% nucleous Positive Tissue	38.349		% nucleous Positive Tissue	51.1546		% nucleous Positive Tissue	43.9324		% nucleous Positive Tissue	49.851		% nucleous Positive Tissue	62.8467		% nucleous Positive Tissue	62.1467		% nucleous Positive Tissue	41.0962		% nucleous Positive Tissue	52.1701
	% nucleous Positive Tissue (weak)	14.7898		% nucleous Positive Tissue (weak)	17.4252		% nucleous Positive Tissue (weak)	17.226		% nucleous Positive Tissue (weak)	15.9823		% nucleous Positive Tissue (weak)	21.8627		% nucleous Positive Tissue (weak)	21.4822		% nucleous Positive Tissue (weak)	16.202		% nucleous Positive Tissue (weak)	17.861
	% nucleous Positive Tissue (moderate)	7.9312		% nucleous Positive Tissue (moderate)	10.9013		% nucleous Positive Tissue (moderate)	10.8025		% nucleous Positive Tissue (moderate)	11.4171		% nucleous Positive Tissue (moderate)	13.6821		% nucleous Positive Tissue (moderate)	13.429		% nucleous Positive Tissue (moderate)	9.82544		% nucleous Positive Tissue (moderate)	11.5396
	% nucleous Positive Tissue (strong)	15.628		% nucleous Positive Tissue (strong)	22.8281		% nucleous Positive Tissue (strong)	15.9038		% nucleous Positive Tissue (strong)	22.4516		% nucleous Positive Tissue (strong)	27.3018		% nucleous Positive Tissue (strong)	27.2354		% nucleous Positive Tissue (strong)	15.0688		% nucleous Positive Tissue (strong)	22.7695
	% cd31 Positive Tissue	3.08775		% cd31 Positive Tissue	2.00279		% cd31 Positive Tissue	2.20216		% cd31 Positive Tissue	1.72205		% cd31 Positive Tissue	0.991741		% cd31 Positive Tissue	1.91837		% cd31 Positive Tissue	1.68648		% cd31 Positive Tissue	1.59284
	% cd31 Positive Tissue (weak)	1.01804		% cd31 Positive Tissue (weak)	0.67935		% cd31 Positive Tissue (weak)	0.769125		% cd31 Positive Tissue (weak)	0.600814		% cd31 Positive Tissue (weak)	0.482369		% cd31 Positive Tissue (weak)	0.643875		% cd31 Positive Tissue (weak)	0.632994		% cd31 Positive Tissue (weak)	0.479981
	% cd31 Positive Tissue (moderate)	0.909631		% cd31 Positive Tissue (moderate)	0.63577		% cd31 Positive Tissue (moderate)	0.705057		% cd31 Positive Tissue (moderate)	0.534703		% cd31 Positive Tissue (moderate)	0.316013		% cd31 Positive Tissue (moderate)	0.571562		% cd31 Positive Tissue (moderate)	0.525594		% cd31 Positive Tissue (moderate)	0.482
	% cd31 Positive Tissue (strong)	1.16008		% cd31 Positive Tissue (strong)	0.687667		% cd31 Positive Tissue (strong)	0.727979		% cd31 Positive Tissue (strong)	0.58653		% cd31 Positive Tissue (strong)	0.19336		% cd31 Positive Tissue (strong)	0.702937		% cd31 Positive Tissue (strong)	0.527894		% cd31 Positive Tissue (strong)	0.63086
	nucleous Average Positive Optical Density	0.357051		nucleous Average Positive Optical Density	0.367008		nucleous Average Positive Optical Density	0.326401		nucleous Average Positive Optical Density	0.36035		nucleous Average Positive Optical Density	0.365949		nucleous Average Positive Optical Density	0.365926		nucleous Average Positive Optical Density	0.329		nucleous Average Positive Optical Density	0.357464
	cd31 Average Positive Optical Density	0.633496		cd31 Average Positive Optical Density	0.609564		cd31 Average Positive Optical Density	0.606636		cd31 Average Positive Optical Density	0.612866		cd31 Average Positive Optical Density	0.544575		cd31 Average Positive Optical Density	0.627055		cd31 Average Positive Optical Density	0.595974		cd31 Average Positive Optical Density	0.636049
	% Negative Tissue	59.1274		% Negative Tissue	47.3932		% Negative Tissue	54.1912		% Negative Tissue	48.7647		% Negative Tissue	36.3951		% Negative Tissue	36.3535		% Negative Tissue	57.4386		% Negative Tissue	46.6308
	tumour: Tissue Area Analyzed (μm²)	452987		tumour: Tissue Area Analyzed (μm²)	468514		tumour: Tissue Area Analyzed (μm²)	802458		tumour: Tissue Area Analyzed (μm²)	848454		tumour: Tissue Area Analyzed (μm²)	589344		tumour: Tissue Area Analyzed (μm²)	605296		tumour: Tissue Area Analyzed (μm²)	550070		tumour: Tissue Area Analyzed (μm²)	940071
	tumour: nucleous Area (μm²)	173716		tumour: nucleous Area (μm²)	239667		tumour: nucleous Area (μm²)	352539		tumour: nucleous Area (μm²)	422962		tumour: nucleous Area (μm²)	370383		tumour: nucleous Area (μm²)	376172		tumour: nucleous Area (μm²)	226058		tumour: nucleous Area (μm²)	490436
	tumour: nucleous Weak Area (μm²)	66996		tumour: nucleous Weak Area (μm²)	81639.7		tumour: nucleous Weak Area (μm²)	138232		tumour: nucleous Weak Area (μm²)	135603		tumour: nucleous Weak Area (μm²)	128847		tumour: nucleous Weak Area (μm²)	130031		tumour: nucleous Weak Area (μm²)	89122.2		tumour: nucleous Weak Area (μm²)	167906
	tumour: nucleous Moderate Area (μm²)	35927.3		tumour: nucleous Moderate Area (μm²)	51074.2		tumour: nucleous Moderate Area (μm²)	86685.7		tumour: nucleous Moderate Area (μm²)	96868.8		tumour: nucleous Moderate Area (μm²)	80634.7		tumour: nucleous Moderate Area (μm²)	81285.5		tumour: nucleous Moderate Area (μm²)	54046.8		tumour: nucleous Moderate Area (μm²)	108480
	tumour: nucleous Strong Area (μm²)	70792.7		tumour: nucleous Strong Area (μm²)	106953		tumour: nucleous Strong Area (μm²)	127621		tumour: nucleous Strong Area (μm²)	190491		tumour: nucleous Strong Area (μm²)	160902		tumour: nucleous Strong Area (μm²)	164855		tumour: nucleous Strong Area (μm²)	82888.8		tumour: nucleous Strong Area (μm²)	214050
	tumour: cd31 Area (μm²)	13987.1		tumour: cd31 Area (μm²)	9383.34		tumour: cd31 Area (μm²)	17671.4		tumour: cd31 Area (μm²)	14610.8		tumour: cd31 Area (μm²)	5844.76		tumour: cd31 Area (μm²)	11611.8		tumour: cd31 Area (μm²)	9276.83		tumour: cd31 Area (μm²)	14973.8
	tumour: cd31 Weak Area (μm²)	4611.6		tumour: cd31 Weak Area (μm²)	3182.85		tumour: cd31 Weak Area (μm²)	6171.9		tumour: cd31 Weak Area (μm²)	5097.63		tumour: cd31 Weak Area (μm²)	2842.81		tumour: cd31 Weak Area (μm²)	3897.35		tumour: cd31 Weak Area (μm²)	3481.91		tumour: cd31 Weak Area (μm²)	4512.16
	tumour: cd31 Moderate Area (μm²)	4120.5		tumour: cd31 Moderate Area (μm²)	2978.68		tumour: cd31 Moderate Area (μm²)	5657.79		tumour: cd31 Moderate Area (μm²)	4536.7		tumour: cd31 Moderate Area (μm²)	1862.4		tumour: cd31 Moderate Area (μm²)	3459.65		tumour: cd31 Moderate Area (μm²)	2891.13		tumour: cd31 Moderate Area (μm²)	4531.14
	tumour: cd31 Strong Area (μm²)	5255		tumour: cd31 Strong Area (μm²)	3221.82		tumour: cd31 Strong Area (μm²)	5841.72		tumour: cd31 Strong Area (μm²)	4976.43		tumour: cd31 Strong Area (μm²)	1139.55		tumour: cd31 Strong Area (μm²)	4254.85		tumour: cd31 Strong Area (μm²)	2903.78		tumour: cd31 Strong Area (μm²)	5930.53
	tumour: % nucleous Positive Tissue	38.349		tumour: % nucleous Positive Tissue	51.1546		tumour: % nucleous Positive Tissue	43.9324		tumour: % nucleous Positive Tissue	49.851		tumour: % nucleous Positive Tissue	62.8467		tumour: % nucleous Positive Tissue	62.1467		tumour: % nucleous Positive Tissue	41.0962		tumour: % nucleous Positive Tissue	52.1701
	tumour: % nucleous Positive Tissue (weak)	14.7898		tumour: % nucleous Positive Tissue (weak)	17.4252		tumour: % nucleous Positive Tissue (weak)	17.226		tumour: % nucleous Positive Tissue (weak)	15.9823		tumour: % nucleous Positive Tissue (weak)	21.8627		tumour: % nucleous Positive Tissue (weak)	21.4822		tumour: % nucleous Positive Tissue (weak)	16.202		tumour: % nucleous Positive Tissue (weak)	17.861
	tumour: % nucleous Positive Tissue (moderate)	7.9312		tumour: % nucleous Positive Tissue (moderate)	10.9013		tumour: % nucleous Positive Tissue (moderate)	10.8025		tumour: % nucleous Positive Tissue (moderate)	11.4171		tumour: % nucleous Positive Tissue (moderate)	13.6821		tumour: % nucleous Positive Tissue (moderate)	13.429		tumour: % nucleous Positive Tissue (moderate)	9.82544		tumour: % nucleous Positive Tissue (moderate)	11.5396
	tumour: % nucleous Positive Tissue (strong)	15.628		tumour: % nucleous Positive Tissue (strong)	22.8281		tumour: % nucleous Positive Tissue (strong)	15.9038		tumour: % nucleous Positive Tissue (strong)	22.4516		tumour: % nucleous Positive Tissue (strong)	27.3018		tumour: % nucleous Positive Tissue (strong)	27.2354		tumour: % nucleous Positive Tissue (strong)	15.0688		tumour: % nucleous Positive Tissue (strong)	22.7695
	tumour: % cd31 Positive Tissue	3.08775		tumour: % cd31 Positive Tissue	2.00279		tumour: % cd31 Positive Tissue	2.20216		tumour: % cd31 Positive Tissue	1.72205		tumour: % cd31 Positive Tissue	0.991741		tumour: % cd31 Positive Tissue	1.91837		tumour: % cd31 Positive Tissue	1.68648		tumour: % cd31 Positive Tissue	1.59284		1.90052
	tumour: % cd31 Positive Tissue (weak)	1.01804		tumour: % cd31 Positive Tissue (weak)	0.67935		tumour: % cd31 Positive Tissue (weak)	0.769125		tumour: % cd31 Positive Tissue (weak)	0.600814		tumour: % cd31 Positive Tissue (weak)	0.482369		tumour: % cd31 Positive Tissue (weak)	0.643875		tumour: % cd31 Positive Tissue (weak)	0.632994		tumour: % cd31 Positive Tissue (weak)	0.479981
	tumour: % cd31 Positive Tissue (moderate)	0.909631		tumour: % cd31 Positive Tissue (moderate)	0.63577		tumour: % cd31 Positive Tissue (moderate)	0.705057		tumour: % cd31 Positive Tissue (moderate)	0.534703		tumour: % cd31 Positive Tissue (moderate)	0.316013		tumour: % cd31 Positive Tissue (moderate)	0.571562		tumour: % cd31 Positive Tissue (moderate)	0.525594		tumour: % cd31 Positive Tissue (moderate)	0.482
	tumour: % cd31 Positive Tissue (strong)	1.16008		tumour: % cd31 Positive Tissue (strong)	0.687667		tumour: % cd31 Positive Tissue (strong)	0.727979		tumour: % cd31 Positive Tissue (strong)	0.58653		tumour: % cd31 Positive Tissue (strong)	0.19336		tumour: % cd31 Positive Tissue (strong)	0.702937		tumour: % cd31 Positive Tissue (strong)	0.527894		tumour: % cd31 Positive Tissue (strong)	0.63086
	tumour: nucleous Average Positive Optical Density	0.357051		tumour: nucleous Average Positive Optical Density	0.367008		tumour: nucleous Average Positive Optical Density	0.326401		tumour: nucleous Average Positive Optical Density	0.36035		tumour: nucleous Average Positive Optical Density	0.365949		tumour: nucleous Average Positive Optical Density	0.365926		tumour: nucleous Average Positive Optical Density	0.329		tumour: nucleous Average Positive Optical Density	0.357464
	tumour: cd31 Average Positive Optical Density	0.633496		tumour: cd31 Average Positive Optical Density	0.609564		tumour: cd31 Average Positive Optical Density	0.606636		tumour: cd31 Average Positive Optical Density	0.612866		tumour: cd31 Average Positive Optical Density	0.544575		tumour: cd31 Average Positive Optical Density	0.627055		tumour: cd31 Average Positive Optical Density	0.595974		tumour: cd31 Average Positive Optical Density	0.636049
	tumour: % Negative Tissue	59.1274		tumour: % Negative Tissue	47.3932		tumour: % Negative Tissue	54.1912		tumour: % Negative Tissue	48.7647		tumour: % Negative Tissue	36.3951		tumour: % Negative Tissue	36.3535		tumour: % Negative Tissue	57.4386		tumour: % Negative Tissue	46.6308
	BSNA43.2d	WT
	Name	Value		Name	Value		Name	Value		Name	Value		Name	Value		Name	Value		Name	Value		Name	Value
	Classified Area (mm²)	0.80927		Classified Area (mm²)	0.93763		Classified Area (mm²)	0.66927		Classified Area (mm²)	0.53265		Classified Area (mm²)	0.495		Classified Area (mm²)	0.52972		Classified Area (mm²)	0.46565		Classified Area (mm²)	0.61406
	tumour Area (mm²)	0.80744		tumour Area (mm²)	0.93534		tumour Area (mm²)	0.66927		tumour Area (mm²)	0.53265		tumour Area (mm²)	0.49499		tumour Area (mm²)	0.52972		tumour Area (mm²)	0.46562		tumour Area (mm²)	0.60641
	Necrosis Area (mm²)	0		Necrosis Area (mm²)	0		Necrosis Area (mm²)	0		Necrosis Area (mm²)	0		Necrosis Area (mm²)	0		Necrosis Area (mm²)	0		Necrosis Area (mm²)	3e-05		Necrosis Area (mm²)	0
	Empty Area (mm²)	0.00157		Empty Area (mm²)	0.00195		Empty Area (mm²)	0		Empty Area (mm²)	0		Empty Area (mm²)	0		Empty Area (mm²)	0		Empty Area (mm²)	0		Empty Area (mm²)	0.00766
	Normal Area (mm²)	0.00026		Normal Area (mm²)	0.00034		Normal Area (mm²)	0		Normal Area (mm²)	0		Normal Area (mm²)	2e-05		Normal Area (mm²)	0		Normal Area (mm²)	0		Normal Area (mm²)	0
	Tissue Area Analyzed (μm²)	799246		Tissue Area Analyzed (μm²)	932487		Tissue Area Analyzed (μm²)	668252		Tissue Area Analyzed (μm²)	531645		Tissue Area Analyzed (μm²)	493717		Tissue Area Analyzed (μm²)	528855		Tissue Area Analyzed (μm²)	465007		Tissue Area Analyzed (μm²)	598209
	nucleous Area (μm²)	425785		nucleous Area (μm²)	515629		nucleous Area (μm²)	396536		nucleous Area (μm²)	366913		nucleous Area (μm²)	339002		nucleous Area (μm²)	343921		nucleous Area (μm²)	207893		nucleous Area (μm²)	276327
	nucleous Weak Area (μm²)	146830		nucleous Weak Area (μm²)	181106		nucleous Weak Area (μm²)	147435		nucleous Weak Area (μm²)	135954		nucleous Weak Area (μm²)	127709		nucleous Weak Area (μm²)	113323		nucleous Weak Area (μm²)	74203.7		nucleous Weak Area (μm²)	95492.7
	nucleous Moderate Area (μm²)	98378		nucleous Moderate Area (μm²)	112481		nucleous Moderate Area (μm²)	83864.6		nucleous Moderate Area (μm²)	72467.9		nucleous Moderate Area (μm²)	66517.8		nucleous Moderate Area (μm²)	73975.8		nucleous Moderate Area (μm²)	44977.2		nucleous Moderate Area (μm²)	66378.7
	nucleous Strong Area (μm²)	180577		nucleous Strong Area (μm²)	222041		nucleous Strong Area (μm²)	165237		nucleous Strong Area (μm²)	158491		nucleous Strong Area (μm²)	144775		nucleous Strong Area (μm²)	156623		nucleous Strong Area (μm²)	88712.3		nucleous Strong Area (μm²)	114455
	cd31 Area (μm²)	13906.9		cd31 Area (μm²)	10709.9		cd31 Area (μm²)	2929.59		cd31 Area (μm²)	3320.49		cd31 Area (μm²)	694.004		cd31 Area (μm²)	4183.76		cd31 Area (μm²)	2989.55		cd31 Area (μm²)	3186.14
	cd31 Weak Area (μm²)	4603.5		cd31 Weak Area (μm²)	3703.8		cd31 Weak Area (μm²)	1298.7		cd31 Weak Area (μm²)	1372.57		cd31 Weak Area (μm²)	278.563		cd31 Weak Area (μm²)	1731.59		cd31 Weak Area (μm²)	1039.87		cd31 Weak Area (μm²)	1350.82
	cd31 Moderate Area (μm²)	4234.11		cd31 Moderate Area (μm²)	3128.71		cd31 Moderate Area (μm²)	950.555		cd31 Moderate Area (μm²)	1080.1		cd31 Moderate Area (μm²)	242.889		cd31 Moderate Area (μm²)	1353.6		cd31 Moderate Area (μm²)	913.362		cd31 Moderate Area (μm²)	1013.3
	cd31 Strong Area (μm²)	5069.29		cd31 Strong Area (μm²)	3877.36		cd31 Strong Area (μm²)	680.341		cd31 Strong Area (μm²)	867.821		cd31 Strong Area (μm²)	172.552		cd31 Strong Area (μm²)	1098.57		cd31 Strong Area (μm²)	1036.32		cd31 Strong Area (μm²)	822.026
	% nucleous Positive Tissue	53.2733		% nucleous Positive Tissue	55.2961		% nucleous Positive Tissue	59.3393		% nucleous Positive Tissue	69.0147		% nucleous Positive Tissue	68.6632		% nucleous Positive Tissue	65.0312		% nucleous Positive Tissue	44.7076		% nucleous Positive Tissue	46.1924
	% nucleous Positive Tissue (weak)	18.3711		% nucleous Positive Tissue (weak)	19.4219		% nucleous Positive Tissue (weak)	22.0628		% nucleous Positive Tissue (weak)	25.5724		% nucleous Positive Tissue (weak)	25.8669		% nucleous Positive Tissue (weak)	21.4279		% nucleous Positive Tissue (weak)	15.9576		% nucleous Positive Tissue (weak)	15.9631
	% nucleous Positive Tissue (moderate)	12.3088		% nucleous Positive Tissue (moderate)	12.0625		% nucleous Positive Tissue (moderate)	12.5498		% nucleous Positive Tissue (moderate)	13.6309		% nucleous Positive Tissue (moderate)	13.4729		% nucleous Positive Tissue (moderate)	13.9879		% nucleous Positive Tissue (moderate)	9.67237		% nucleous Positive Tissue (moderate)	11.0962
	% nucleous Positive Tissue (strong)	22.5934		% nucleous Positive Tissue (strong)	23.8117		% nucleous Positive Tissue (strong)	24.7267		% nucleous Positive Tissue (strong)	29.8114		% nucleous Positive Tissue (strong)	29.3235		% nucleous Positive Tissue (strong)	29.6154		% nucleous Positive Tissue (strong)	19.0776		% nucleous Positive Tissue (strong)	19.133
	% cd31 Positive Tissue	1.74		% cd31 Positive Tissue	1.14853		% cd31 Positive Tissue	0.438396		% cd31 Positive Tissue	0.624569		% cd31 Positive Tissue	0.140567		% cd31 Positive Tissue	0.791097		% cd31 Positive Tissue	0.642906		% cd31 Positive Tissue	0.532614
	% cd31 Positive Tissue (weak)	0.57598		% cd31 Positive Tissue (weak)	0.397196		% cd31 Positive Tissue (weak)	0.194342		% cd31 Positive Tissue (weak)	0.258175		% cd31 Positive Tissue (weak)	0.056422		% cd31 Positive Tissue (weak)	0.327423		% cd31 Positive Tissue (weak)	0.223624		% cd31 Positive Tissue (weak)	0.22581
	% cd31 Positive Tissue (moderate)	0.529762		% cd31 Positive Tissue (moderate)	0.335523		% cd31 Positive Tissue (moderate)	0.142245		% cd31 Positive Tissue (moderate)	0.203161		% cd31 Positive Tissue (moderate)	0.049196		% cd31 Positive Tissue (moderate)	0.255949		% cd31 Positive Tissue (moderate)	0.196419		% cd31 Positive Tissue (moderate)	0.169389
	% cd31 Positive Tissue (strong)	0.634259		% cd31 Positive Tissue (strong)	0.415809		% cd31 Positive Tissue (strong)	0.101809		% cd31 Positive Tissue (strong)	0.163233		% cd31 Positive Tissue (strong)	0.03495		% cd31 Positive Tissue (strong)	0.207725		% cd31 Positive Tissue (strong)	0.222862		% cd31 Positive Tissue (strong)	0.137415
	nucleous Average Positive Optical Density	0.35317		nucleous Average Positive Optical Density	0.361774		nucleous Average Positive Optical Density	0.350801		nucleous Average Positive Optical Density	0.367515		nucleous Average Positive Optical Density	0.36444		nucleous Average Positive Optical Density	0.373974		nucleous Average Positive Optical Density	0.363697		nucleous Average Positive Optical Density	0.34363
	cd31 Average Positive Optical Density	0.629021		cd31 Average Positive Optical Density	0.631449		cd31 Average Positive Optical Density	0.560422		cd31 Average Positive Optical Density	0.571048		cd31 Average Positive Optical Density	0.565345		cd31 Average Positive Optical Density	0.573102		cd31 Average Positive Optical Density	0.620279		cd31 Average Positive Optical Density	0.572589
	% Negative Tissue	45.4352		% Negative Tissue	43.8662		% Negative Tissue	40.3399		% Negative Tissue	30.551		% Negative Tissue	31.235		% Negative Tissue	34.4295		% Negative Tissue	54.7926		% Negative Tissue	53.3954
	tumour: Tissue Area Analyzed (μm²)	799246		tumour: Tissue Area Analyzed (μm²)	932487		tumour: Tissue Area Analyzed (μm²)	668252		tumour: Tissue Area Analyzed (μm²)	531645		tumour: Tissue Area Analyzed (μm²)	493717		tumour: Tissue Area Analyzed (μm²)	528855		tumour: Tissue Area Analyzed (μm²)	465007		tumour: Tissue Area Analyzed (μm²)	598209
	tumour: nucleous Area (μm²)	425785		tumour: nucleous Area (μm²)	515629		tumour: nucleous Area (μm²)	396536		tumour: nucleous Area (μm²)	366913		tumour: nucleous Area (μm²)	339002		tumour: nucleous Area (μm²)	343921		tumour: nucleous Area (μm²)	207893		tumour: nucleous Area (μm²)	276327
	tumour: nucleous Weak Area (μm²)	146830		tumour: nucleous Weak Area (μm²)	181106		tumour: nucleous Weak Area (μm²)	147435		tumour: nucleous Weak Area (μm²)	135954		tumour: nucleous Weak Area (μm²)	127709		tumour: nucleous Weak Area (μm²)	113323		tumour: nucleous Weak Area (μm²)	74203.7		tumour: nucleous Weak Area (μm²)	95492.7
	tumour: nucleous Moderate Area (μm²)	98378		tumour: nucleous Moderate Area (μm²)	112481		tumour: nucleous Moderate Area (μm²)	83864.6		tumour: nucleous Moderate Area (μm²)	72467.9		tumour: nucleous Moderate Area (μm²)	66517.8		tumour: nucleous Moderate Area (μm²)	73975.8		tumour: nucleous Moderate Area (μm²)	44977.2		tumour: nucleous Moderate Area (μm²)	66378.7
	tumour: nucleous Strong Area (μm²)	180577		tumour: nucleous Strong Area (μm²)	222041		tumour: nucleous Strong Area (μm²)	165237		tumour: nucleous Strong Area (μm²)	158491		tumour: nucleous Strong Area (μm²)	144775		tumour: nucleous Strong Area (μm²)	156623		tumour: nucleous Strong Area (μm²)	88712.3		tumour: nucleous Strong Area (μm²)	114455
	tumour: cd31 Area (μm²)	13906.9		tumour: cd31 Area (μm²)	10709.9		tumour: cd31 Area (μm²)	2929.59		tumour: cd31 Area (μm²)	3320.49		tumour: cd31 Area (μm²)	694.004		tumour: cd31 Area (μm²)	4183.76		tumour: cd31 Area (μm²)	2989.55		tumour: cd31 Area (μm²)	3186.14
	tumour: cd31 Weak Area (μm²)	4603.5		tumour: cd31 Weak Area (μm²)	3703.8		tumour: cd31 Weak Area (μm²)	1298.7		tumour: cd31 Weak Area (μm²)	1372.57		tumour: cd31 Weak Area (μm²)	278.563		tumour: cd31 Weak Area (μm²)	1731.59		tumour: cd31 Weak Area (μm²)	1039.87		tumour: cd31 Weak Area (μm²)	1350.82
	tumour: cd31 Moderate Area (μm²)	4234.11		tumour: cd31 Moderate Area (μm²)	3128.71		tumour: cd31 Moderate Area (μm²)	950.555		tumour: cd31 Moderate Area (μm²)	1080.1		tumour: cd31 Moderate Area (μm²)	242.889		tumour: cd31 Moderate Area (μm²)	1353.6		tumour: cd31 Moderate Area (μm²)	913.362		tumour: cd31 Moderate Area (μm²)	1013.3
	tumour: cd31 Strong Area (μm²)	5069.29		tumour: cd31 Strong Area (μm²)	3877.36		tumour: cd31 Strong Area (μm²)	680.341		tumour: cd31 Strong Area (μm²)	867.821		tumour: cd31 Strong Area (μm²)	172.552		tumour: cd31 Strong Area (μm²)	1098.57		tumour: cd31 Strong Area (μm²)	1036.32		tumour: cd31 Strong Area (μm²)	822.026
	tumour: % nucleous Positive Tissue	53.2733		tumour: % nucleous Positive Tissue	55.2961		tumour: % nucleous Positive Tissue	59.3393		tumour: % nucleous Positive Tissue	69.0147		tumour: % nucleous Positive Tissue	68.6632		tumour: % nucleous Positive Tissue	65.0312		tumour: % nucleous Positive Tissue	44.7076		tumour: % nucleous Positive Tissue	46.1924
	tumour: % nucleous Positive Tissue (weak)	18.3711		tumour: % nucleous Positive Tissue (weak)	19.4219		tumour: % nucleous Positive Tissue (weak)	22.0628		tumour: % nucleous Positive Tissue (weak)	25.5724		tumour: % nucleous Positive Tissue (weak)	25.8669		tumour: % nucleous Positive Tissue (weak)	21.4279		tumour: % nucleous Positive Tissue (weak)	15.9576		tumour: % nucleous Positive Tissue (weak)	15.9631
	tumour: % nucleous Positive Tissue (moderate)	12.3088		tumour: % nucleous Positive Tissue (moderate)	12.0625		tumour: % nucleous Positive Tissue (moderate)	12.5498		tumour: % nucleous Positive Tissue (moderate)	13.6309		tumour: % nucleous Positive Tissue (moderate)	13.4729		tumour: % nucleous Positive Tissue (moderate)	13.9879		tumour: % nucleous Positive Tissue (moderate)	9.67237		tumour: % nucleous Positive Tissue (moderate)	11.0962
	tumour: % nucleous Positive Tissue (strong)	22.5934		tumour: % nucleous Positive Tissue (strong)	23.8117		tumour: % nucleous Positive Tissue (strong)	24.7267		tumour: % nucleous Positive Tissue (strong)	29.8114		tumour: % nucleous Positive Tissue (strong)	29.3235		tumour: % nucleous Positive Tissue (strong)	29.6154		tumour: % nucleous Positive Tissue (strong)	19.0776		tumour: % nucleous Positive Tissue (strong)	19.133
	tumour: % cd31 Positive Tissue	1.74		tumour: % cd31 Positive Tissue	1.14853		tumour: % cd31 Positive Tissue	0.438396		tumour: % cd31 Positive Tissue	0.624569		tumour: % cd31 Positive Tissue	0.140567		tumour: % cd31 Positive Tissue	0.791097		tumour: % cd31 Positive Tissue	0.642906		tumour: % cd31 Positive Tissue	0.532614		0.757335
	tumour: % cd31 Positive Tissue (weak)	0.57598		tumour: % cd31 Positive Tissue (weak)	0.397196		tumour: % cd31 Positive Tissue (weak)	0.194342		tumour: % cd31 Positive Tissue (weak)	0.258175		tumour: % cd31 Positive Tissue (weak)	0.056422		tumour: % cd31 Positive Tissue (weak)	0.327423		tumour: % cd31 Positive Tissue (weak)	0.223624		tumour: % cd31 Positive Tissue (weak)	0.22581
	tumour: % cd31 Positive Tissue (moderate)	0.529762		tumour: % cd31 Positive Tissue (moderate)	0.335523		tumour: % cd31 Positive Tissue (moderate)	0.142245		tumour: % cd31 Positive Tissue (moderate)	0.203161		tumour: % cd31 Positive Tissue (moderate)	0.049196		tumour: % cd31 Positive Tissue (moderate)	0.255949		tumour: % cd31 Positive Tissue (moderate)	0.196419		tumour: % cd31 Positive Tissue (moderate)	0.169389
	tumour: % cd31 Positive Tissue (strong)	0.634259		tumour: % cd31 Positive Tissue (strong)	0.415809		tumour: % cd31 Positive Tissue (strong)	0.101809		tumour: % cd31 Positive Tissue (strong)	0.163233		tumour: % cd31 Positive Tissue (strong)	0.03495		tumour: % cd31 Positive Tissue (strong)	0.207725		tumour: % cd31 Positive Tissue (strong)	0.222862		tumour: % cd31 Positive Tissue (strong)	0.137415
	tumour: nucleous Average Positive Optical Density	0.35317		tumour: nucleous Average Positive Optical Density	0.361774		tumour: nucleous Average Positive Optical Density	0.350801		tumour: nucleous Average Positive Optical Density	0.367515		tumour: nucleous Average Positive Optical Density	0.36444		tumour: nucleous Average Positive Optical Density	0.373974		tumour: nucleous Average Positive Optical Density	0.363697		tumour: nucleous Average Positive Optical Density	0.34363
	tumour: cd31 Average Positive Optical Density	0.629021		tumour: cd31 Average Positive Optical Density	0.631449		tumour: cd31 Average Positive Optical Density	0.560422		tumour: cd31 Average Positive Optical Density	0.571048		tumour: cd31 Average Positive Optical Density	0.565345		tumour: cd31 Average Positive Optical Density	0.573102		tumour: cd31 Average Positive Optical Density	0.620279		tumour: cd31 Average Positive Optical Density	0.572589
	tumour: % Negative Tissue	45.4352		tumour: % Negative Tissue	43.8662		tumour: % Negative Tissue	40.3399		tumour: % Negative Tissue	30.551		tumour: % Negative Tissue	31.235		tumour: % Negative Tissue	34.4295		tumour: % Negative Tissue	54.7926		tumour: % Negative Tissue	53.3954
