# Supplementary material for: CYRI-B-mediated macropinocytosis drives metastasis via lysophosphatidic acid receptor uptake
Source: eLife journal article supplement (doi:10.7554/elife.83712), 2024-05-07
Supplement: fig2-figsupp1-data4 [file Figure 2- figure supplement 1- source data 4 Excel H.xlsx]

## Sheet: Sheet1
									Tissue sum	Necrosis Sum		Ratio (%)
				Length (µm)	Area (µm^2)	Type
HOM	BSNA9.1d	Tissue		45963.7	4.17669e+07	Polygon			1.12797e+08	1.2973e+06		1.15012
				45794.3	7.10301e+07	Polygon
		Necrosis		3988.42	704727	Polygon
				1106.29	65693.3	Polygon
				2118.48	129921	Polygon
				1841.44	160595	Polygon
				763.93	34844.9	Polygon
				828.03	25784.9	Polygon
				631.91	26895.9	Polygon
				1929.89	119949	Polygon
				910.36	28891.9	Polygon
HOM	BSNA8.1f	Tissue	1	39713.4	3.25921e+07	Polygon			3.25921e+07	956398		2.93445
		cNecrosis	1	3832	772526	Polygon
			2	2095.2	183873	Polygon
HOM	BSNA11.1f	Tissue
			1	51718.6	7.49718e+07	Polygon			7.49718e+07	8.79735e+06		11.7342
		Necrosis	1	22592.5	7.72565e+06	Polygon
			2	3514.21	781723	Polygon
			3	2247.81	266377	Polygon
			4	785.3	23600.4	Polygon
HOM	BSNA13.1b			43007.3	3.60871e+07	Polygon			3.60871e+07	0		0
		Necrosis			0
HOM	BSNA37.2b	Tissue		58325.7	1.27522e+08	Polygon			1.46839e+08	1.85325e+07		12.6209
				19922.8	1.93175e+07	Polygon
		Necrosis
				10698.2	5.26028e+06	Polygon
				22237.5	1.1511e+07	Polygon
				4206.84	692131	Polygon
				1599.76	100851	Polygon
				1899.06	217326	Polygon
				1398.36	96066.5	Polygon
				1239.25	107070	Polygon
				1888.48	192239	Polygon
				517.15	19080.4	Polygon
				2247.66	336441	Polygon
				Length (µm)	Area (µm^2)	Type
HOM	BSNA10.4d	Tissue		42597.2	5.51221e+07	Polygon			9.35276e+07	322455		0.34477
				18726.9	6.51808e+06	Polygon
				27982.5	2.89586e+07	Polygon
				7450.66	2.92878e+06	Polygon
		Necrosis		931.13	37862.8	Polygon
				707.16	19978.3	Polygon
				1721.69	66813.6	Polygon
				472.54	7519.93	Polygon
				1619.18	142284	Polygon
				838.68	31412.6	Polygon
				730.82	16583.5	Polygon
HOM	BSNA8.2c	Tissue
				51787.6	9.74615e+07	Polygon			9.74615e+07	1.38163e+06		1.41761
				5562.38	1.22024e+06	Polygon
				1600.48	109207	Polygon
		Necrosis		913.63	52174.5	Polygon
HOM	BSNA19.1b	Tissue		43929.3	7.40212e+07	Polygon			7.40212e+07	210380		0.284216
		Necrosis
				1216.46	99512.5	Polygon
				1250.83	110868	Polygon
HOM	BSNA15.1a	Tissue		44699.8	6.42126e+07	Polygon			6.42126e+07	2.76569e+07		43.0708
		Necrosis		26071.2	2.69474e+07	Polygon
				2552.94	390221	Polygon
				1813.3	157296	Polygon
				1215.5	101750	Polygon
				1257.22	60262.7	Polygon
HOM	BSNA11.1g	Tissue		51169.3	6.27016e+07	Polygon			1.36101e+08	1.41919e+06		1.04275
				64932.2	7.33993e+07	Polygon
		Necrosis		1496.66	125794	Polygon
				1789.77	125210	Polygon
				1240.29	53608.6	Polygon
				1060.67	54351.7	Polygon
				624.75	24552.2	Polygon
				1438.25	117754	Polygon
				2570.35	325955	Polygon
				4438.11	591965	Polygon
HOM	BSNA9.4a	Tissue		58050.2	1.40747e+08	Polygon			58050.2	1352.06		2.32912
		Necrosis		1352.06	103519	Polygon
HOM	BSNA24.1d	Tissue		48363.3	7.96892e+07	Polygon			7.96892e+07	1.14899e+06		1.44184
		Necrosis		2941.35	518399	Polygon
				3489.32	630596	Polygon
WT	BAJF108.1f	Tissue		26082	2.76058e+07	Polygon			7.48773e+07	5.26775e+06		7.03517
				33523.7	4.72715e+07	Polygon
		Necrosis		1244.8	101940	Polygon
				14435.4	5.1658e+06	Polygon
WT	BSNA7.2d	Tissue
				44016.3	7.05068e+07	Polygon			1.43327e+08	159211		0.111082
				39693.2	7.28201e+07	Polygon
		Necrosis		1125.66	88410.2	Polygon
				1069.8	70800.8	Polygon
WT	BSNA7.2g	Tissue		69553.9	1.3251e+08	Polygon			1.72851e+08	1.51323e+07		8.7545
				29505.3	3.0685e+07	Polygon
				14762.1	9.65667e+06	Polygon
		Necrosis		3027.14	585202	Polygon
				1112.31	53756.3	Polygon
				3471.29	668690	Polygon
				1295.55	84290.4	Polygon
				8732.66	5.18366e+06	Polygon
				965.2	51326.9	Polygon
				1148.92	73576.3	Polygon
				765.08	32196.9	Polygon
				1662.28	94238.3	Polygon
				1901.55	170457	Polygon
				14274.9	5.34329e+06	Polygon
				8062.81	2.50364e+06	Polygon
				2177.84	260345	Polygon
				859.86	27605.3	Polygon
WT	BSNA1.2a	Tissue		38205	5.38204e+07	Polygon			1.31764e+08	6.42295e+06		4.87458
				45097.9	7.79438e+07	Polygon
		Necrosis		10902.5	4.75118e+06	Polygon
				1322.84	112272	Polygon
				1341.17	101715	Polygon
				2973.25	535533	Polygon
				2696.81	490619	Polygon
				2253.96	223140	Polygon
				1412.18	93377	Polygon
				1034.87	59862.9	Polygon
				904.08	55252.1	Polygon
WT	BSNA34.2c	Tissue
				42550.9	5.5041e+07	Polygon			5.5041e+07	1.54333e+07		28.0396
		Necrosis		22084.5	1.53164e+07	Polygon
				1302.94	116905	Polygon
WT	BSNA43.2d	Tissue		68394.7	1.09021e+08	Polygon			1.09021e+08	3.48703e+07		31.985
		Necrosis		52680.2	3.43037e+07	Polygon
				1743.62	64056.3	Polygon
				1325.01	45945.9	Polygon
				940.68	30814.5	Polygon
				776.42	29561.1	Polygon
				1415.24	52874.8	Polygon
				906.8	37265.2	Polygon
				1681.85	104323	Polygon
				757.45	32915.5	Polygon
				1771.93	98045	Polygon
				979.54	31225.4	Polygon
				897.07	39542.8	Polygon
WT	BSNA43.1c	Tissue		34055	4.51041e+07	Polygon			6.98996e+07	71980		0.102976
	This is 43.3c (mistake in the histology slide)			28458.8	2.47956e+07	Polygon
		Necrosis		838.15	26056.4	Polygon
				437.27	11331.3	Polygon
				890.29	34592.4	Polygon
WT	BSNA41.2d	Tissue		38940.4	5.41688e+07	Polygon			8.65392e+07	5.08344e+06		5.87415
				35472.9	3.23704e+07	Polygon
		Necrosis		6098.12	807604	Polygon
				1580.98	156431	Polygon
				8877.15	3.94146e+06	Polygon
				1547.38	143445	Polygon
				806.04	34496.8	Polygon
WT	BSNA35.1a	Tissue		40923.7	6.28338e+07	Polygon			1.31641e+08	6.78127e+06		5.15132
				49271.4	6.88076e+07	Polygon
		Necrosis		1972.94	169986	Polygon
				1008.65	34637.4	Polygon
				1165.64	39693.6	Polygon
				2448.75	229019	Polygon
				1014.57	62064.1	Polygon
				1207.37	66777.2	Polygon
				593.79	23169	Polygon
				7334.59	1.43439e+06	Polygon
				769.09	38455.3	Polygon
				1864.58	126355	Polygon
				1003.61	53763.4	Polygon
				1423.31	96317.5	Polygon
				2068.9	173878	Polygon
				559.62	13377.1	Polygon
				5058.94	1.29644e+06	Polygon
				4533.63	989000	Polygon
				1953.04	260372	Polygon
				3597.8	275820	Polygon
				816.17	32634.1	Polygon
				610.43	16196.6	Polygon
				826.98	35344.8	Polygon
				841.03	39418.8	Polygon
				549.05	12861.5	Polygon
				1749.91	157804	Polygon
				762.56	30223.4	Polygon
				1975.22	261690	Polygon
				1641.41	93511.9	Polygon
				1826.37	149602	Polygon
				1669.24	103271	Polygon
				795.34	36313.9	Polygon
				2661.46	270376	Polygon
				1525.8	158511	Polygon
WT	BSNA39.1c	Tissue		35782.5	3.81208e+07	Polygon			3.81208e+07	46667		0.122419
		Necrosis		873.92	46667	Polygon
WT	BAJF107.2b	Tissue		63971.5	1.32498e+08	Polygon			1.32498e+08	299929		0.226365
		Necrosis		2671.35	299929	Polygon
WT	BSNA32.5b	Tissue		57740.4	8.49489e+07	Polygon			8.49489e+07	326148		0.383935
		Necrosis		3103.53	326148	Polygon
