# Supplementary material for: CYRI-B-mediated macropinocytosis drives metastasis via lysophosphatidic acid receptor uptake
Source: eLife journal article supplement (doi:10.7554/elife.83712), 2024-05-07
Supplement: fig3-data1 [file Figure 3- source data 1 Excel 3B.xlsx]

## Sheet: Sheet1
	BSNA54.1d	WT							BSNA60.2h	HOM
	Number of lesions	Normal	33					Number of lesions	Normal	5
		PanIN1	31						PanIN1	39
		PanIN2	123						PanIN2	227
		PanIN3	53						PanIN3	341
		PDAC							PDAC
			240					Total		612
								BSNA69.3a	HOM
	BSNA71.1d	WT
	Number of lesions	Normal	35					Number of lesions	Normal	43
		PanIN1	26						PanIN1	100
		PanIN2	51						PanIN2	169
		PanIN3	36						PanIN3	167
			148							479
		BSNA53.2a	WT						BSNA70.2c	HOM
								Number of lesions	Normal	16
	Number of lesions	Normal	50						PanIN1	26
		PanIN1	54						PanIN2	101
		PanIN2	108						PanIN3	154
		PanIN3	52
										297
			264
	BSNA47.1a	wt							BSNA64.1e	HOM
	Number of lesions	Normal	10					Number of lesions	Normal	40
		PanIN1	44						PanIN1	24
		PanIN2	51						PanIN2	235
		PanIN3	55						PanIN3	206
		PDAC							PDAC
			160							505
		BSNA80.1g	wt
	Number of lesions	Normal	77
		PanIN1	41
		PanIN2	57
		PanIN3	85
			260
		BSNA84.3c	wt					BSNA64.1f	HOM
	Number of lesions	Normal	44					Number of lesions	Normal	31
		PanIN1	70						PanIN1	18
		PanIN2	116						PanIN2	69
		PanIN3	28						PanIN3	32
										150
			258
		BSNA87.2d	wt						BSNA90.2e	Hom
	Number of lesions	Normal	50					Number of lesions	Normal	17
		PanIN1	14						PanIN1	8
		PanIN2	63						PanIN2	105
		PanIN3	8						PanIN3	299
			135
										429
