# Supplementary material for: CYRI-B-mediated macropinocytosis drives metastasis via lysophosphatidic acid receptor uptake
Source: eLife journal article supplement (doi:10.7554/elife.83712), 2024-05-07
Supplement: fig3-data4 [file Figure 3- source data 4 Excel 3G.xlsx]

## Sheet: Sheet1
pJNK
15weeks]
		BSNA64.1e	HOM
		Name	Value		Name	Value		Name	Value		Name	Value		Name	Value		Name	Value		Name	Value		Name	Value
		Tissue Area Analyzed (μm²)	409713		Tissue Area Analyzed (μm²)	475391		Tissue Area Analyzed (μm²)	422931		Tissue Area Analyzed (μm²)	578532		Tissue Area Analyzed (μm²)	625702		Tissue Area Analyzed (μm²)	512351		Tissue Area Analyzed (μm²)	458766		Tissue Area Analyzed (μm²)	1.24947e+06
		Stain 1 Area (μm²)	121347		Stain 1 Area (μm²)	167464		Stain 1 Area (μm²)	164910		Stain 1 Area (μm²)	195492		Stain 1 Area (μm²)	198936		Stain 1 Area (μm²)	179949		Stain 1 Area (μm²)	111328		Stain 1 Area (μm²)	378581
		Stain 1 Weak Area (μm²)	34677.6		Stain 1 Weak Area (μm²)	50896.9		Stain 1 Weak Area (μm²)	40452		Stain 1 Weak Area (μm²)	52515.2		Stain 1 Weak Area (μm²)	53743.1		Stain 1 Weak Area (μm²)	49100.9		Stain 1 Weak Area (μm²)	36135.9		Stain 1 Weak Area (μm²)	105154
		Stain 1 Moderate Area (μm²)	23016.8		Stain 1 Moderate Area (μm²)	31778.2		Stain 1 Moderate Area (μm²)	26868.1		Stain 1 Moderate Area (μm²)	33457.1		Stain 1 Moderate Area (μm²)	34571.3		Stain 1 Moderate Area (μm²)	30435.4		Stain 1 Moderate Area (μm²)	22609.2		Stain 1 Moderate Area (μm²)	69269.1
		Stain 1 Strong Area (μm²)	63652.9		Stain 1 Strong Area (μm²)	84788.8		Stain 1 Strong Area (μm²)	97589.8		Stain 1 Strong Area (μm²)	109520		Stain 1 Strong Area (μm²)	110622		Stain 1 Strong Area (μm²)	100413		Stain 1 Strong Area (μm²)	52582.7		Stain 1 Strong Area (μm²)	204157
		Stain 2 Area (μm²)	107011		Stain 2 Area (μm²)	125853		Stain 2 Area (μm²)	161372		Stain 2 Area (μm²)	120352		Stain 2 Area (μm²)	214109		Stain 2 Area (μm²)	132116		Stain 2 Area (μm²)	173694		Stain 2 Area (μm²)	247398
		Stain 2 Weak Area (μm²)	79860.1		Stain 2 Weak Area (μm²)	82054		Stain 2 Weak Area (μm²)	78039.3		Stain 2 Weak Area (μm²)	61825.7		Stain 2 Weak Area (μm²)	95307.6		Stain 2 Weak Area (μm²)	59659		Stain 2 Weak Area (μm²)	72391.9		Stain 2 Weak Area (μm²)	128828
		Stain 2 Moderate Area (μm²)	18185.1		Stain 2 Moderate Area (μm²)	26732.4		Stain 2 Moderate Area (μm²)	41812.7		Stain 2 Moderate Area (μm²)	28918.8		Stain 2 Moderate Area (μm²)	54654.7		Stain 2 Moderate Area (μm²)	33219.3		Stain 2 Moderate Area (μm²)	42193.8		Stain 2 Moderate Area (μm²)	59104.2
		Stain 2 Strong Area (μm²)	8965.27		Stain 2 Strong Area (μm²)	17066.9		Stain 2 Strong Area (μm²)	41520		Stain 2 Strong Area (μm²)	29607.5		Stain 2 Strong Area (μm²)	64147.1		Stain 2 Strong Area (μm²)	39237.9		Stain 2 Strong Area (μm²)	59108.2		Stain 2 Strong Area (μm²)	59465.6
		% Stain 1 Positive Tissue	29.6176		% Stain 1 Positive Tissue	35.2266		% Stain 1 Positive Tissue	38.9921		% Stain 1 Positive Tissue	33.7911		% Stain 1 Positive Tissue	31.7941		% Stain 1 Positive Tissue	35.1222		% Stain 1 Positive Tissue	24.2668		% Stain 1 Positive Tissue	30.2994
		% Stain 1 Positive Tissue (weak)	8.46387		% Stain 1 Positive Tissue (weak)	10.7063		% Stain 1 Positive Tissue (weak)	9.56467		% Stain 1 Positive Tissue (weak)	9.07731		% Stain 1 Positive Tissue (weak)	8.58925		% Stain 1 Positive Tissue (weak)	9.58344		% Stain 1 Positive Tissue (weak)	7.87676		% Stain 1 Positive Tissue (weak)	8.41595
		% Stain 1 Positive Tissue (moderate)	5.61778		% Stain 1 Positive Tissue (moderate)	6.68466		% Stain 1 Positive Tissue (moderate)	6.35283		% Stain 1 Positive Tissue (moderate)	5.7831		% Stain 1 Positive Tissue (moderate)	5.52521		% Stain 1 Positive Tissue (moderate)	5.94034		% Stain 1 Positive Tissue (moderate)	4.92826		% Stain 1 Positive Tissue (moderate)	5.5439
		% Stain 1 Positive Tissue (strong)	15.536		% Stain 1 Positive Tissue (strong)	17.8356		% Stain 1 Positive Tissue (strong)	23.0746		% Stain 1 Positive Tissue (strong)	18.9307		% Stain 1 Positive Tissue (strong)	17.6796		% Stain 1 Positive Tissue (strong)	19.5984		% Stain 1 Positive Tissue (strong)	11.4618		% Stain 1 Positive Tissue (strong)	16.3395
		% Stain 2 Positive Tissue	26.1184		% Stain 2 Positive Tissue	26.4736		% Stain 2 Positive Tissue	38.1556		% Stain 2 Positive Tissue	20.803		% Stain 2 Positive Tissue	34.2191		% Stain 2 Positive Tissue	25.7862		% Stain 2 Positive Tissue	37.8611		% Stain 2 Positive Tissue	19.8003		28.6522
		% Stain 2 Positive Tissue (weak)	19.4917		% Stain 2 Positive Tissue (weak)	17.2603		% Stain 2 Positive Tissue (weak)	18.452		% Stain 2 Positive Tissue (weak)	10.6866		% Stain 2 Positive Tissue (weak)	15.2321		% Stain 2 Positive Tissue (weak)	11.6442		% Stain 2 Positive Tissue (weak)	15.7797		% Stain 2 Positive Tissue (weak)	10.3107
		% Stain 2 Positive Tissue (moderate)	4.43851		% Stain 2 Positive Tissue (moderate)	5.62325		% Stain 2 Positive Tissue (moderate)	9.88641		% Stain 2 Positive Tissue (moderate)	4.99864		% Stain 2 Positive Tissue (moderate)	8.73495		% Stain 2 Positive Tissue (moderate)	6.48369		% Stain 2 Positive Tissue (moderate)	9.19723		% Stain 2 Positive Tissue (moderate)	4.73036
		% Stain 2 Positive Tissue (strong)	2.18818		% Stain 2 Positive Tissue (strong)	3.59007		% Stain 2 Positive Tissue (strong)	9.8172		% Stain 2 Positive Tissue (strong)	5.11769		% Stain 2 Positive Tissue (strong)	10.252		% Stain 2 Positive Tissue (strong)	7.65839		% Stain 2 Positive Tissue (strong)	12.8842		% Stain 2 Positive Tissue (strong)	4.75928
		Stain 1 Average Positive Optical Density	0.430391		Stain 1 Average Positive Optical Density	0.428337		Stain 1 Average Positive Optical Density	0.492903		Stain 1 Average Positive Optical Density	0.466057		Stain 1 Average Positive Optical Density	0.461486		Stain 1 Average Positive Optical Density	0.472474		Stain 1 Average Positive Optical Density	0.407453		Stain 1 Average Positive Optical Density	0.439774
		Stain 2 Average Positive Optical Density	0.227623		Stain 2 Average Positive Optical Density	0.250966		Stain 2 Average Positive Optical Density	0.294312		Stain 2 Average Positive Optical Density	0.29304		Stain 2 Average Positive Optical Density	0.314346		Stain 2 Average Positive Optical Density	0.311963		Stain 2 Average Positive Optical Density	0.325754		Stain 2 Average Positive Optical Density	0.290383
		% Negative Tissue	51.0682		% Negative Tissue	44.7854		% Negative Tissue	35.605		% Negative Tissue	52.8238		% Negative Tissue	43.9759		% Negative Tissue	48.0632		% Negative Tissue	46.0958		% Negative Tissue	55.6164
		BSNA60.2h	HOM
		Name	Value		Name	Value		Name	Value		Name	Value		Name	Value		Name	Value		Name	Value		Name	Value
		Tissue Area Analyzed (μm²)	837104		Tissue Area Analyzed (μm²)	856980		Tissue Area Analyzed (μm²)	633068		Tissue Area Analyzed (μm²)	861731		Tissue Area Analyzed (μm²)	1.05765e+06		Tissue Area Analyzed (μm²)	1081386		Tissue Area Analyzed (μm²)	920161		Tissue Area Analyzed (μm²)	1169275
		Stain 1 Area (μm²)	150570		Stain 1 Area (μm²)	171100		Stain 1 Area (μm²)	114731		Stain 1 Area (μm²)	174260		Stain 1 Area (μm²)	192669		Stain 1 Area (μm²)	205310		Stain 1 Area (μm²)	203270		Stain 1 Area (μm²)	349829
		Stain 1 Weak Area (μm²)	55530.5		Stain 1 Weak Area (μm²)	51230		Stain 1 Weak Area (μm²)	35930.9		Stain 1 Weak Area (μm²)	50633.1		Stain 1 Weak Area (μm²)	59589.7		Stain 1 Weak Area (μm²)	61733.9		Stain 1 Weak Area (μm²)	58070.2		Stain 1 Weak Area (μm²)	108994
		Stain 1 Moderate Area (μm²)	37418.7		Stain 1 Moderate Area (μm²)	36365.7		Stain 1 Moderate Area (μm²)	24987.8		Stain 1 Moderate Area (μm²)	37567.1		Stain 1 Moderate Area (μm²)	42225.5		Stain 1 Moderate Area (μm²)	44414.2		Stain 1 Moderate Area (μm²)	40008		Stain 1 Moderate Area (μm²)	77974
		Stain 1 Strong Area (μm²)	57621		Stain 1 Strong Area (μm²)	83504.2		Stain 1 Strong Area (μm²)	53811.8		Stain 1 Strong Area (μm²)	86060		Stain 1 Strong Area (μm²)	90853.6		Stain 1 Strong Area (μm²)	99161.8		Stain 1 Strong Area (μm²)	105192		Stain 1 Strong Area (μm²)	162861
		Stain 2 Area (μm²)	310507		Stain 2 Area (μm²)	204133		Stain 2 Area (μm²)	192179		Stain 2 Area (μm²)	101649		Stain 2 Area (μm²)	369719		Stain 2 Area (μm²)	55312.3		Stain 2 Area (μm²)	303301		Stain 2 Area (μm²)	28471.9
		Stain 2 Weak Area (μm²)	135084		Stain 2 Weak Area (μm²)	114258		Stain 2 Weak Area (μm²)	100896		Stain 2 Weak Area (μm²)	59706.9		Stain 2 Weak Area (μm²)	127977		Stain 2 Weak Area (μm²)	30565.3		Stain 2 Weak Area (μm²)	126657		Stain 2 Weak Area (μm²)	18413.8
		Stain 2 Moderate Area (μm²)	77501.2		Stain 2 Moderate Area (μm²)	42744.5		Stain 2 Moderate Area (μm²)	40696.8		Stain 2 Moderate Area (μm²)	19839.8		Stain 2 Moderate Area (μm²)	77397.9		Stain 2 Moderate Area (μm²)	10760.8		Stain 2 Moderate Area (μm²)	65474.4		Stain 2 Moderate Area (μm²)	5083.34
		Stain 2 Strong Area (μm²)	97921.7		Stain 2 Strong Area (μm²)	47129.9		Stain 2 Strong Area (μm²)	50586.3		Stain 2 Strong Area (μm²)	22102.3		Stain 2 Strong Area (μm²)	164344		Stain 2 Strong Area (μm²)	13986.3		Stain 2 Strong Area (μm²)	111169		Stain 2 Strong Area (μm²)	4974.81
		% Stain 1 Positive Tissue	17.987		% Stain 1 Positive Tissue	19.9654		% Stain 1 Positive Tissue	18.1229		% Stain 1 Positive Tissue	20.2221		% Stain 1 Positive Tissue	18.2167		% Stain 1 Positive Tissue	18.9858		% Stain 1 Positive Tissue	22.0907		% Stain 1 Positive Tissue	29.9185
		% Stain 1 Positive Tissue (weak)	6.63365		% Stain 1 Positive Tissue (weak)	5.97797		% Stain 1 Positive Tissue (weak)	5.67568		% Stain 1 Positive Tissue (weak)	5.87574		% Stain 1 Positive Tissue (weak)	5.63415		% Stain 1 Positive Tissue (weak)	5.70878		% Stain 1 Positive Tissue (weak)	6.31087		% Stain 1 Positive Tissue (weak)	9.32152
		% Stain 1 Positive Tissue (moderate)	4.47002		% Stain 1 Positive Tissue (moderate)	4.24346		% Stain 1 Positive Tissue (moderate)	3.94709		% Stain 1 Positive Tissue (moderate)	4.35949		% Stain 1 Positive Tissue (moderate)	3.99238		% Stain 1 Positive Tissue (moderate)	4.10715		% Stain 1 Positive Tissue (moderate)	4.34793		% Stain 1 Positive Tissue (moderate)	6.66858
		% Stain 1 Positive Tissue (strong)	6.88338		% Stain 1 Positive Tissue (strong)	9.744		% Stain 1 Positive Tissue (strong)	8.50017		% Stain 1 Positive Tissue (strong)	9.98688		% Stain 1 Positive Tissue (strong)	8.59012		% Stain 1 Positive Tissue (strong)	9.16988		% Stain 1 Positive Tissue (strong)	11.4319		% Stain 1 Positive Tissue (strong)	13.9284
		% Stain 2 Positive Tissue	37.093		% Stain 2 Positive Tissue	23.82		% Stain 2 Positive Tissue	30.3568		% Stain 2 Positive Tissue	11.7959		% Stain 2 Positive Tissue	34.9566		% Stain 2 Positive Tissue	5.11495		% Stain 2 Positive Tissue	32.9617		% Stain 2 Positive Tissue	2.43501		22.3167
		% Stain 2 Positive Tissue (weak)	16.1371		% Stain 2 Positive Tissue (weak)	13.3327		% Stain 2 Positive Tissue (weak)	15.9376		% Stain 2 Positive Tissue (weak)	6.92872		% Stain 2 Positive Tissue (weak)	12.1001		% Stain 2 Positive Tissue (weak)	2.82649		% Stain 2 Positive Tissue (weak)	13.7647		% Stain 2 Positive Tissue (weak)	1.5748
		% Stain 2 Positive Tissue (moderate)	9.25825		% Stain 2 Positive Tissue (moderate)	4.98781		% Stain 2 Positive Tissue (moderate)	6.4285		% Stain 2 Positive Tissue (moderate)	2.30232		% Stain 2 Positive Tissue (moderate)	7.3179		% Stain 2 Positive Tissue (moderate)	0.995089		% Stain 2 Positive Tissue (moderate)	7.11553		% Stain 2 Positive Tissue (moderate)	0.434743
		% Stain 2 Positive Tissue (strong)	11.6977		% Stain 2 Positive Tissue (strong)	5.49953		% Stain 2 Positive Tissue (strong)	7.99066		% Stain 2 Positive Tissue (strong)	2.56487		% Stain 2 Positive Tissue (strong)	15.5386		% Stain 2 Positive Tissue (strong)	1.29337		% Stain 2 Positive Tissue (strong)	12.0815		% Stain 2 Positive Tissue (strong)	0.425461
		Stain 1 Average Positive Optical Density	0.343422		Stain 1 Average Positive Optical Density	0.398977		Stain 1 Average Positive Optical Density	0.396272		Stain 1 Average Positive Optical Density	0.390271		Stain 1 Average Positive Optical Density	0.394661		Stain 1 Average Positive Optical Density	0.39257		Stain 1 Average Positive Optical Density	0.425972		Stain 1 Average Positive Optical Density	0.376448
		Stain 2 Average Positive Optical Density	0.319673		Stain 2 Average Positive Optical Density	0.293202		Stain 2 Average Positive Optical Density	0.311497		Stain 2 Average Positive Optical Density	0.29096		Stain 2 Average Positive Optical Density	0.388575		Stain 2 Average Positive Optical Density	0.30242		Stain 2 Average Positive Optical Density	0.353087		Stain 2 Average Positive Optical Density	0.269959
		% Negative Tissue	51.7869		% Negative Tissue	58.6132		% Negative Tissue	55.2807		% Negative Tissue	68.6127		% Negative Tissue	51.7289		% Negative Tissue	76.4506		% Negative Tissue	49.5196		% Negative Tissue	67.9734
		BSNA70.2c	HOM
		Name	Value		Name	Value		Name	Value		Name	Value		Name	Value		Name	Value		Name	Value		Name	Value
		Tissue Area Analyzed (μm²)	509996		Tissue Area Analyzed (μm²)	483379		Tissue Area Analyzed (μm²)	411755		Tissue Area Analyzed (μm²)	776302		Tissue Area Analyzed (μm²)	535615		Tissue Area Analyzed (μm²)	484655		Tissue Area Analyzed (μm²)	750220		Tissue Area Analyzed (μm²)	1.15054e+06
		Stain 1 Area (μm²)	87080.2		Stain 1 Area (μm²)	86173.2		Stain 1 Area (μm²)	75969		Stain 1 Area (μm²)	126253		Stain 1 Area (μm²)	108969		Stain 1 Area (μm²)	146064		Stain 1 Area (μm²)	184516		Stain 1 Area (μm²)	309220
		Stain 1 Weak Area (μm²)	32785.7		Stain 1 Weak Area (μm²)	29279.6		Stain 1 Weak Area (μm²)	26557.5		Stain 1 Weak Area (μm²)	42505.5		Stain 1 Weak Area (μm²)	38528.3		Stain 1 Weak Area (μm²)	48233.7		Stain 1 Weak Area (μm²)	59966.1		Stain 1 Weak Area (μm²)	92168.7
		Stain 1 Moderate Area (μm²)	21088.5		Stain 1 Moderate Area (μm²)	20662.4		Stain 1 Moderate Area (μm²)	18087.6		Stain 1 Moderate Area (μm²)	28254.3		Stain 1 Moderate Area (μm²)	25463.5		Stain 1 Moderate Area (μm²)	31341.2		Stain 1 Moderate Area (μm²)	37893.8		Stain 1 Moderate Area (μm²)	64665
		Stain 1 Strong Area (μm²)	33206		Stain 1 Strong Area (μm²)	36231.2		Stain 1 Strong Area (μm²)	31323.9		Stain 1 Strong Area (μm²)	55493		Stain 1 Strong Area (μm²)	44977.6		Stain 1 Strong Area (μm²)	66489.3		Stain 1 Strong Area (μm²)	86655.8		Stain 1 Strong Area (μm²)	152387
		Stain 2 Area (μm²)	245198		Stain 2 Area (μm²)	327015		Stain 2 Area (μm²)	220706		Stain 2 Area (μm²)	444462		Stain 2 Area (μm²)	169475		Stain 2 Area (μm²)	222947		Stain 2 Area (μm²)	273435		Stain 2 Area (μm²)	433325
		Stain 2 Weak Area (μm²)	84768		Stain 2 Weak Area (μm²)	88514.2		Stain 2 Weak Area (μm²)	68145.7		Stain 2 Weak Area (μm²)	124818		Stain 2 Weak Area (μm²)	81552.3		Stain 2 Weak Area (μm²)	85666.9		Stain 2 Weak Area (μm²)	117719		Stain 2 Weak Area (μm²)	179523
		Stain 2 Moderate Area (μm²)	63060		Stain 2 Moderate Area (μm²)	69022		Stain 2 Moderate Area (μm²)	47435.9		Stain 2 Moderate Area (μm²)	86681.8		Stain 2 Moderate Area (μm²)	46264.5		Stain 2 Moderate Area (μm²)	54165.2		Stain 2 Moderate Area (μm²)	62724.6		Stain 2 Moderate Area (μm²)	112661
		Stain 2 Strong Area (μm²)	97370.4		Stain 2 Strong Area (μm²)	169479		Stain 2 Strong Area (μm²)	105124		Stain 2 Strong Area (μm²)	232963		Stain 2 Strong Area (μm²)	41658		Stain 2 Strong Area (μm²)	83114.5		Stain 2 Strong Area (μm²)	92990.8		Stain 2 Strong Area (μm²)	141141
		% Stain 1 Positive Tissue	17.0747		% Stain 1 Positive Tissue	17.8272		% Stain 1 Positive Tissue	18.4501		% Stain 1 Positive Tissue	16.2634		% Stain 1 Positive Tissue	20.3447		% Stain 1 Positive Tissue	30.1378		% Stain 1 Positive Tissue	24.5949		% Stain 1 Positive Tissue	26.8762
		% Stain 1 Positive Tissue (weak)	6.42861		% Stain 1 Positive Tissue (weak)	6.05727		% Stain 1 Positive Tissue (weak)	6.44984		% Stain 1 Positive Tissue (weak)	5.47539		% Stain 1 Positive Tissue (weak)	7.19329		% Stain 1 Positive Tissue (weak)	9.95217		% Stain 1 Positive Tissue (weak)	7.99313		% Stain 1 Positive Tissue (weak)	8.01094
		% Stain 1 Positive Tissue (moderate)	4.13503		% Stain 1 Positive Tissue (moderate)	4.27458		% Stain 1 Positive Tissue (moderate)	4.3928		% Stain 1 Positive Tissue (moderate)	3.6396		% Stain 1 Positive Tissue (moderate)	4.75406		% Stain 1 Positive Tissue (moderate)	6.4667		% Stain 1 Positive Tissue (moderate)	5.05103		% Stain 1 Positive Tissue (moderate)	5.62042
		% Stain 1 Positive Tissue (strong)	6.51102		% Stain 1 Positive Tissue (strong)	7.49539		% Stain 1 Positive Tissue (strong)	7.60742		% Stain 1 Positive Tissue (strong)	7.14838		% Stain 1 Positive Tissue (strong)	8.39738		% Stain 1 Positive Tissue (strong)	13.7189		% Stain 1 Positive Tissue (strong)	11.5507		% Stain 1 Positive Tissue (strong)	13.2448
		% Stain 2 Positive Tissue	48.0785		% Stain 2 Positive Tissue	67.6518		% Stain 2 Positive Tissue	53.6013		% Stain 2 Positive Tissue	57.2538		% Stain 2 Positive Tissue	31.6411		% Stain 2 Positive Tissue	46.0011		% Stain 2 Positive Tissue	36.4472		% Stain 2 Positive Tissue	37.6629		47.2922
		% Stain 2 Positive Tissue (weak)	16.6213		% Stain 2 Positive Tissue (weak)	18.3115		% Stain 2 Positive Tissue (weak)	16.5501		% Stain 2 Positive Tissue (weak)	16.0785		% Stain 2 Positive Tissue (weak)	15.2259		% Stain 2 Positive Tissue (weak)	17.6758		% Stain 2 Positive Tissue (weak)	15.6913		% Stain 2 Positive Tissue (weak)	15.6034
		% Stain 2 Positive Tissue (moderate)	12.3648		% Stain 2 Positive Tissue (moderate)	14.2791		% Stain 2 Positive Tissue (moderate)	11.5204		% Stain 2 Positive Tissue (moderate)	11.166		% Stain 2 Positive Tissue (moderate)	8.63763		% Stain 2 Positive Tissue (moderate)	11.176		% Stain 2 Positive Tissue (moderate)	8.36082		% Stain 2 Positive Tissue (moderate)	9.79203
		% Stain 2 Positive Tissue (strong)	19.0924		% Stain 2 Positive Tissue (strong)	35.0612		% Stain 2 Positive Tissue (strong)	25.5308		% Stain 2 Positive Tissue (strong)	30.0094		% Stain 2 Positive Tissue (strong)	7.7776		% Stain 2 Positive Tissue (strong)	17.1492		% Stain 2 Positive Tissue (strong)	12.3951		% Stain 2 Positive Tissue (strong)	12.2675
		Stain 1 Average Positive Optical Density	0.352095		Stain 1 Average Positive Optical Density	0.367357		Stain 1 Average Positive Optical Density	0.362368		Stain 1 Average Positive Optical Density	0.383495		Stain 1 Average Positive Optical Density	0.364678		Stain 1 Average Positive Optical Density	0.403079		Stain 1 Average Positive Optical Density	0.407852		Stain 1 Average Positive Optical Density	0.408203
		Stain 2 Average Positive Optical Density	0.347096		Stain 2 Average Positive Optical Density	0.404138		Stain 2 Average Positive Optical Density	0.387768		Stain 2 Average Positive Optical Density	0.428909		Stain 2 Average Positive Optical Density	0.290503		Stain 2 Average Positive Optical Density	0.343595		Stain 2 Average Positive Optical Density	0.33596		Stain 2 Average Positive Optical Density	0.317878
		% Negative Tissue	43.6734		% Negative Tissue	27.1485		% Negative Tissue	37.3799		% Negative Tissue	35.6575		% Negative Tissue	53.9006		% Negative Tissue	34.7414		% Negative Tissue	47.185		% Negative Tissue	44.4455
		BSNA69.3a	HOM
		Name	Value		Name	Value		Name	Value		Name	Value		Name	Value		Name	Value		Name	Value		Name	Value
		Tissue Area Analyzed (μm²)	786617		Tissue Area Analyzed (μm²)	1.08513e+06		Tissue Area Analyzed (μm²)	894174		Tissue Area Analyzed (μm²)	483691		Tissue Area Analyzed (μm²)	728536		Tissue Area Analyzed (μm²)	409515		Tissue Area Analyzed (μm²)	578492		Tissue Area Analyzed (μm²)	500009
		Stain 1 Area (μm²)	171035		Stain 1 Area (μm²)	294232		Stain 1 Area (μm²)	255435		Stain 1 Area (μm²)	160619		Stain 1 Area (μm²)	278384		Stain 1 Area (μm²)	123776		Stain 1 Area (μm²)	193072		Stain 1 Area (μm²)	152405
		Stain 1 Weak Area (μm²)	45787.6		Stain 1 Weak Area (μm²)	77625.3		Stain 1 Weak Area (μm²)	86119.5		Stain 1 Weak Area (μm²)	46984.4		Stain 1 Weak Area (μm²)	102895		Stain 1 Weak Area (μm²)	43945.9		Stain 1 Weak Area (μm²)	78198		Stain 1 Weak Area (μm²)	57463.4
		Stain 1 Moderate Area (μm²)	30872.4		Stain 1 Moderate Area (μm²)	55792.6		Stain 1 Moderate Area (μm²)	66092.7		Stain 1 Moderate Area (μm²)	35755.4		Stain 1 Moderate Area (μm²)	73257.9		Stain 1 Moderate Area (μm²)	27099		Stain 1 Moderate Area (μm²)	40118.9		Stain 1 Moderate Area (μm²)	35870.3
		Stain 1 Strong Area (μm²)	94375.2		Stain 1 Strong Area (μm²)	160814		Stain 1 Strong Area (μm²)	103223		Stain 1 Strong Area (μm²)	77878.8		Stain 1 Strong Area (μm²)	102231		Stain 1 Strong Area (μm²)	52731.1		Stain 1 Strong Area (μm²)	74755.4		Stain 1 Strong Area (μm²)	59071.3
		Stain 2 Area (μm²)	219897		Stain 2 Area (μm²)	205127		Stain 2 Area (μm²)	184661		Stain 2 Area (μm²)	130636		Stain 2 Area (μm²)	106340		Stain 2 Area (μm²)	125364		Stain 2 Area (μm²)	106158		Stain 2 Area (μm²)	103795
		Stain 2 Weak Area (μm²)	103548		Stain 2 Weak Area (μm²)	116040		Stain 2 Weak Area (μm²)	98073.6		Stain 2 Weak Area (μm²)	59491.6		Stain 2 Weak Area (μm²)	53602.3		Stain 2 Weak Area (μm²)	58457		Stain 2 Weak Area (μm²)	52168.2		Stain 2 Weak Area (μm²)	58866.9
		Stain 2 Moderate Area (μm²)	51609.3		Stain 2 Moderate Area (μm²)	46400.7		Stain 2 Moderate Area (μm²)	43331.1		Stain 2 Moderate Area (μm²)	32763.2		Stain 2 Moderate Area (μm²)	23712.4		Stain 2 Moderate Area (μm²)	30072.3		Stain 2 Moderate Area (μm²)	25347.4		Stain 2 Moderate Area (μm²)	23385.7
		Stain 2 Strong Area (μm²)	64738.9		Stain 2 Strong Area (μm²)	42686.8		Stain 2 Strong Area (μm²)	43256.6		Stain 2 Strong Area (μm²)	38381.7		Stain 2 Strong Area (μm²)	29025		Stain 2 Strong Area (μm²)	36835		Stain 2 Strong Area (μm²)	28642.8		Stain 2 Strong Area (μm²)	21542.3
		% Stain 1 Positive Tissue	21.7432		% Stain 1 Positive Tissue	27.1149		% Stain 1 Positive Tissue	28.5666		% Stain 1 Positive Tissue	33.2069		% Stain 1 Positive Tissue	38.2115		% Stain 1 Positive Tissue	30.2251		% Stain 1 Positive Tissue	33.3751		% Stain 1 Positive Tissue	30.4804
		% Stain 1 Positive Tissue (weak)	5.82083		% Stain 1 Positive Tissue (weak)	7.15355		% Stain 1 Positive Tissue (weak)	9.63119		% Stain 1 Positive Tissue (weak)	9.71372		% Stain 1 Positive Tissue (weak)	14.1235		% Stain 1 Positive Tissue (weak)	10.7312		% Stain 1 Positive Tissue (weak)	13.5176		% Stain 1 Positive Tissue (weak)	11.4925
		% Stain 1 Positive Tissue (moderate)	3.92471		% Stain 1 Positive Tissue (moderate)	5.14156		% Stain 1 Positive Tissue (moderate)	7.39148		% Stain 1 Positive Tissue (moderate)	7.3922		% Stain 1 Positive Tissue (moderate)	10.0555		% Stain 1 Positive Tissue (moderate)	6.61735		% Stain 1 Positive Tissue (moderate)	6.93508		% Stain 1 Positive Tissue (moderate)	7.17393
		% Stain 1 Positive Tissue (strong)	11.9976		% Stain 1 Positive Tissue (strong)	14.8198		% Stain 1 Positive Tissue (strong)	11.5439		% Stain 1 Positive Tissue (strong)	16.1009		% Stain 1 Positive Tissue (strong)	14.0325		% Stain 1 Positive Tissue (strong)	12.8765		% Stain 1 Positive Tissue (strong)	12.9225		% Stain 1 Positive Tissue (strong)	11.814
		% Stain 2 Positive Tissue	27.9547		% Stain 2 Positive Tissue	18.9035		% Stain 2 Positive Tissue	20.6516		% Stain 2 Positive Tissue	27.0082		% Stain 2 Positive Tissue	14.5964		% Stain 2 Positive Tissue	30.6129		% Stain 2 Positive Tissue	18.3509		% Stain 2 Positive Tissue	20.7586		22.3546
		% Stain 2 Positive Tissue (weak)	13.1638		% Stain 2 Positive Tissue (weak)	10.6936		% Stain 2 Positive Tissue (weak)	10.9681		% Stain 2 Positive Tissue (weak)	12.2995		% Stain 2 Positive Tissue (weak)	7.35754		% Stain 2 Positive Tissue (weak)	14.2747		% Stain 2 Positive Tissue (weak)	9.01797		% Stain 2 Positive Tissue (weak)	11.7732
		% Stain 2 Positive Tissue (moderate)	6.56093		% Stain 2 Positive Tissue (moderate)	4.27605		% Stain 2 Positive Tissue (moderate)	4.84594		% Stain 2 Positive Tissue (moderate)	6.77357		% Stain 2 Positive Tissue (moderate)	3.25481		% Stain 2 Positive Tissue (moderate)	7.34339		% Stain 2 Positive Tissue (moderate)	4.38164		% Stain 2 Positive Tissue (moderate)	4.67705
		% Stain 2 Positive Tissue (strong)	8.23004		% Stain 2 Positive Tissue (strong)	3.93379		% Stain 2 Positive Tissue (strong)	4.83761		% Stain 2 Positive Tissue (strong)	7.93516		% Stain 2 Positive Tissue (strong)	3.98402		% Stain 2 Positive Tissue (strong)	8.9948		% Stain 2 Positive Tissue (strong)	4.95129		% Stain 2 Positive Tissue (strong)	4.30838
		Stain 1 Average Positive Optical Density	0.458932		Stain 1 Average Positive Optical Density	0.442882		Stain 1 Average Positive Optical Density	0.380568		Stain 1 Average Positive Optical Density	0.424436		Stain 1 Average Positive Optical Density	0.370038		Stain 1 Average Positive Optical Density	0.389899		Stain 1 Average Positive Optical Density	0.365326		Stain 1 Average Positive Optical Density	0.370396
		Stain 2 Average Positive Optical Density	0.318237		Stain 2 Average Positive Optical Density	0.276998		Stain 2 Average Positive Optical Density	0.293876		Stain 2 Average Positive Optical Density	0.308629		Stain 2 Average Positive Optical Density	0.307024		Stain 2 Average Positive Optical Density	0.311604		Stain 2 Average Positive Optical Density	0.310047		Stain 2 Average Positive Optical Density	0.287944
		% Negative Tissue	56.9631		% Negative Tissue	58.4673		% Negative Tissue	55.3454		% Negative Tissue	46.4468		% Negative Tissue	50.2991		% Negative Tissue	46.1261		% Negative Tissue	52.2054		% Negative Tissue	52.7201
		BSNA80.1f	HOM
		Name	Value		Name	Value		Name	Value		Name	Value		Name	Value		Name	Value		Name	Value		Name	Value
		Tissue Area Analyzed (μm²)	826087		Tissue Area Analyzed (μm²)	700384		Tissue Area Analyzed (μm²)	790383		Tissue Area Analyzed (μm²)	1.10673e+06		Tissue Area Analyzed (μm²)	1.37558e+06		Tissue Area Analyzed (μm²)	636781		Tissue Area Analyzed (μm²)	559374		Tissue Area Analyzed (μm²)	435689
		Stain 1 Area (μm²)	171366		Stain 1 Area (μm²)	147045		Stain 1 Area (μm²)	144807		Stain 1 Area (μm²)	272319		Stain 1 Area (μm²)	999596		Stain 1 Area (μm²)	359884		Stain 1 Area (μm²)	298945		Stain 1 Area (μm²)	292053
		Stain 1 Weak Area (μm²)	57629.1		Stain 1 Weak Area (μm²)	50757.8		Stain 1 Weak Area (μm²)	50487.6		Stain 1 Weak Area (μm²)	107750		Stain 1 Weak Area (μm²)	267545		Stain 1 Weak Area (μm²)	154177		Stain 1 Weak Area (μm²)	130696		Stain 1 Weak Area (μm²)	88091.6
		Stain 1 Moderate Area (μm²)	42959.9		Stain 1 Moderate Area (μm²)	37012.9		Stain 1 Moderate Area (μm²)	32693.9		Stain 1 Moderate Area (μm²)	62769.6		Stain 1 Moderate Area (μm²)	374886		Stain 1 Moderate Area (μm²)	124988		Stain 1 Moderate Area (μm²)	93954.4		Stain 1 Moderate Area (μm²)	110175
		Stain 1 Strong Area (μm²)	70776.5		Stain 1 Strong Area (μm²)	59273.9		Stain 1 Strong Area (μm²)	61625.3		Stain 1 Strong Area (μm²)	101800		Stain 1 Strong Area (μm²)	357166		Stain 1 Strong Area (μm²)	80718.6		Stain 1 Strong Area (μm²)	74294.7		Stain 1 Strong Area (μm²)	93786.4
		Stain 2 Area (μm²)	280095		Stain 2 Area (μm²)	312998		Stain 2 Area (μm²)	267207		Stain 2 Area (μm²)	271952		Stain 2 Area (μm²)	183882		Stain 2 Area (μm²)	103216		Stain 2 Area (μm²)	50861.7		Stain 2 Area (μm²)	57054.7
		Stain 2 Weak Area (μm²)	177193		Stain 2 Weak Area (μm²)	169769		Stain 2 Weak Area (μm²)	152156		Stain 2 Weak Area (μm²)	190551		Stain 2 Weak Area (μm²)	98873.2		Stain 2 Weak Area (μm²)	61452.7		Stain 2 Weak Area (μm²)	32602.7		Stain 2 Weak Area (μm²)	34752
		Stain 2 Moderate Area (μm²)	60045.8		Stain 2 Moderate Area (μm²)	72569.7		Stain 2 Moderate Area (μm²)	62750		Stain 2 Moderate Area (μm²)	53966.6		Stain 2 Moderate Area (μm²)	43178.7		Stain 2 Moderate Area (μm²)	23182.5		Stain 2 Moderate Area (μm²)	10580.6		Stain 2 Moderate Area (μm²)	12399.2
		Stain 2 Strong Area (μm²)	42856		Stain 2 Strong Area (μm²)	70658.7		Stain 2 Strong Area (μm²)	52300.4		Stain 2 Strong Area (μm²)	27434.5		Stain 2 Strong Area (μm²)	41830.6		Stain 2 Strong Area (μm²)	18581.2		Stain 2 Strong Area (μm²)	7678.42		Stain 2 Strong Area (μm²)	9903.42
		% Stain 1 Positive Tissue	20.7443		% Stain 1 Positive Tissue	20.9948		% Stain 1 Positive Tissue	18.3211		% Stain 1 Positive Tissue	24.6057		% Stain 1 Positive Tissue	72.6671		% Stain 1 Positive Tissue	56.5161		% Stain 1 Positive Tissue	53.4428		% Stain 1 Positive Tissue	67.0326
		% Stain 1 Positive Tissue (weak)	6.97616		% Stain 1 Positive Tissue (weak)	7.24714		% Stain 1 Positive Tissue (weak)	6.38774		% Stain 1 Positive Tissue (weak)	9.73585		% Stain 1 Positive Tissue (weak)	19.4496		% Stain 1 Positive Tissue (weak)	24.2119		% Stain 1 Positive Tissue (weak)	23.3647		% Stain 1 Positive Tissue (weak)	20.2189
		% Stain 1 Positive Tissue (moderate)	5.20041		% Stain 1 Positive Tissue (moderate)	5.28465		% Stain 1 Positive Tissue (moderate)	4.13646		% Stain 1 Positive Tissue (moderate)	5.67163		% Stain 1 Positive Tissue (moderate)	27.2529		% Stain 1 Positive Tissue (moderate)	19.6282		% Stain 1 Positive Tissue (moderate)	16.7963		% Stain 1 Positive Tissue (moderate)	25.2876
		% Stain 1 Positive Tissue (strong)	8.56769		% Stain 1 Positive Tissue (strong)	8.46306		% Stain 1 Positive Tissue (strong)	7.7969		% Stain 1 Positive Tissue (strong)	9.19824		% Stain 1 Positive Tissue (strong)	25.9647		% Stain 1 Positive Tissue (strong)	12.676		% Stain 1 Positive Tissue (strong)	13.2818		% Stain 1 Positive Tissue (strong)	21.526		13.4343
		% Stain 2 Positive Tissue	33.9062		% Stain 2 Positive Tissue	44.6894		% Stain 2 Positive Tissue	33.8072		% Stain 2 Positive Tissue	24.5725		% Stain 2 Positive Tissue	13.3676		% Stain 2 Positive Tissue	16.2091		% Stain 2 Positive Tissue	9.09262		% Stain 2 Positive Tissue	13.0953
		% Stain 2 Positive Tissue (weak)	21.4497		% Stain 2 Positive Tissue (weak)	24.2394		% Stain 2 Positive Tissue (weak)	19.2509		% Stain 2 Positive Tissue (weak)	17.2174		% Stain 2 Positive Tissue (weak)	7.18773		% Stain 2 Positive Tissue (weak)	9.65052		% Stain 2 Positive Tissue (weak)	5.82842		% Stain 2 Positive Tissue (weak)	7.97635
		% Stain 2 Positive Tissue (moderate)	7.2687		% Stain 2 Positive Tissue (moderate)	10.3614		% Stain 2 Positive Tissue (moderate)	7.93918		% Stain 2 Positive Tissue (moderate)	4.87622		% Stain 2 Positive Tissue (moderate)	3.13894		% Stain 2 Positive Tissue (moderate)	3.64057		% Stain 2 Positive Tissue (moderate)	1.89151		% Stain 2 Positive Tissue (moderate)	2.84588
		% Stain 2 Positive Tissue (strong)	5.18783		% Stain 2 Positive Tissue (strong)	10.0886		% Stain 2 Positive Tissue (strong)	6.61709		% Stain 2 Positive Tissue (strong)	2.47888		% Stain 2 Positive Tissue (strong)	3.04094		% Stain 2 Positive Tissue (strong)	2.91798		% Stain 2 Positive Tissue (strong)	1.37268		% Stain 2 Positive Tissue (strong)	2.27305
		Stain 1 Average Positive Optical Density	0.349589		Stain 1 Average Positive Optical Density	0.346522		Stain 1 Average Positive Optical Density	0.363621		Stain 1 Average Positive Optical Density	0.342554		Stain 1 Average Positive Optical Density	0.36361		Stain 1 Average Positive Optical Density	0.326557		Stain 1 Average Positive Optical Density	0.325725		Stain 1 Average Positive Optical Density	0.359209
		Stain 2 Average Positive Optical Density	0.260262		Stain 2 Average Positive Optical Density	0.292913		Stain 2 Average Positive Optical Density	0.275478		Stain 2 Average Positive Optical Density	0.237056		Stain 2 Average Positive Optical Density	0.286332		Stain 2 Average Positive Optical Density	0.271257		Stain 2 Average Positive Optical Density	0.25776		Stain 2 Average Positive Optical Density	0.265567
		% Negative Tissue	50.692		% Negative Tissue	40.8419		% Negative Tissue	54.747		% Negative Tissue	55.917		% Negative Tissue	17.4314		% Negative Tissue	29.7845		% Negative Tissue	39.6111		% Negative Tissue	22.9841
		BSNA90.2e	HOM
		Name	Value		Name	Value		Name	Value		Name	Value		Name	Value		Name	Value		Name	Value		Name	Value
		Tissue Area Analyzed (μm²)	1.53354e+06		Tissue Area Analyzed (μm²)	1.15439e+06		Tissue Area Analyzed (μm²)	1.12851e+06		Tissue Area Analyzed (μm²)	722762		Tissue Area Analyzed (μm²)	1.19507e+06		Tissue Area Analyzed (μm²)	1.23059e+06		Tissue Area Analyzed (μm²)	1.35441e+06		Tissue Area Analyzed (μm²)	1.35533e+06
		Stain 1 Area (μm²)	228207		Stain 1 Area (μm²)	211690		Stain 1 Area (μm²)	145090		Stain 1 Area (μm²)	93310.6		Stain 1 Area (μm²)	244118		Stain 1 Area (μm²)	213217		Stain 1 Area (μm²)	170588		Stain 1 Area (μm²)	188455
		Stain 1 Weak Area (μm²)	96326.6		Stain 1 Weak Area (μm²)	85079.2		Stain 1 Weak Area (μm²)	60201.7		Stain 1 Weak Area (μm²)	43280.3		Stain 1 Weak Area (μm²)	110102		Stain 1 Weak Area (μm²)	72412.7		Stain 1 Weak Area (μm²)	63088.3		Stain 1 Weak Area (μm²)	86475.7
		Stain 1 Moderate Area (μm²)	65813.8		Stain 1 Moderate Area (μm²)	60880.6		Stain 1 Moderate Area (μm²)	40073.2		Stain 1 Moderate Area (μm²)	25483.1		Stain 1 Moderate Area (μm²)	70206.7		Stain 1 Moderate Area (μm²)	55133.3		Stain 1 Moderate Area (μm²)	44936.1		Stain 1 Moderate Area (μm²)	50224.3
		Stain 1 Strong Area (μm²)	66066.7		Stain 1 Strong Area (μm²)	65730.1		Stain 1 Strong Area (μm²)	44814.8		Stain 1 Strong Area (μm²)	24547.3		Stain 1 Strong Area (μm²)	63809.9		Stain 1 Strong Area (μm²)	85671.5		Stain 1 Strong Area (μm²)	62563.5		Stain 1 Strong Area (μm²)	51755.4
		Stain 2 Area (μm²)	751118		Stain 2 Area (μm²)	172119		Stain 2 Area (μm²)	479844		Stain 2 Area (μm²)	317231		Stain 2 Area (μm²)	48976.2		Stain 2 Area (μm²)	583759		Stain 2 Area (μm²)	555401		Stain 2 Area (μm²)	342983
		Stain 2 Weak Area (μm²)	383778		Stain 2 Weak Area (μm²)	120589		Stain 2 Weak Area (μm²)	199441		Stain 2 Weak Area (μm²)	167477		Stain 2 Weak Area (μm²)	34432.8		Stain 2 Weak Area (μm²)	253873		Stain 2 Weak Area (μm²)	209627		Stain 2 Weak Area (μm²)	210059
		Stain 2 Moderate Area (μm²)	170484		Stain 2 Moderate Area (μm²)	31239.6		Stain 2 Moderate Area (μm²)	107380		Stain 2 Moderate Area (μm²)	73435.1		Stain 2 Moderate Area (μm²)	7520.81		Stain 2 Moderate Area (μm²)	132109		Stain 2 Moderate Area (μm²)	125688		Stain 2 Moderate Area (μm²)	74600.7
		Stain 2 Strong Area (μm²)	196856		Stain 2 Strong Area (μm²)	20291.2		Stain 2 Strong Area (μm²)	173023		Stain 2 Strong Area (μm²)	76318.3		Stain 2 Strong Area (μm²)	7022.58		Stain 2 Strong Area (μm²)	197778		Stain 2 Strong Area (μm²)	220086		Stain 2 Strong Area (μm²)	58323.1
		% Stain 1 Positive Tissue	14.8811		% Stain 1 Positive Tissue	18.3379		% Stain 1 Positive Tissue	12.8567		% Stain 1 Positive Tissue	12.9103		% Stain 1 Positive Tissue	20.4271		% Stain 1 Positive Tissue	17.3264		% Stain 1 Positive Tissue	12.595		% Stain 1 Positive Tissue	13.9047
		% Stain 1 Positive Tissue (weak)	6.28133		% Stain 1 Positive Tissue (weak)	7.37007		% Stain 1 Positive Tissue (weak)	5.33461		% Stain 1 Positive Tissue (weak)	5.98818		% Stain 1 Positive Tissue (weak)	9.21295		% Stain 1 Positive Tissue (weak)	5.88438		% Stain 1 Positive Tissue (weak)	4.65799		% Stain 1 Positive Tissue (weak)	6.38041
		% Stain 1 Positive Tissue (moderate)	4.29164		% Stain 1 Positive Tissue (moderate)	5.27384		% Stain 1 Positive Tissue (moderate)	3.55098		% Stain 1 Positive Tissue (moderate)	3.52579		% Stain 1 Positive Tissue (moderate)	5.87468		% Stain 1 Positive Tissue (moderate)	4.48023		% Stain 1 Positive Tissue (moderate)	3.31776		% Stain 1 Positive Tissue (moderate)	3.70569
		% Stain 1 Positive Tissue (strong)	4.30813		% Stain 1 Positive Tissue (strong)	5.69394		% Stain 1 Positive Tissue (strong)	3.97114		% Stain 1 Positive Tissue (strong)	3.39631		% Stain 1 Positive Tissue (strong)	5.33942		% Stain 1 Positive Tissue (strong)	6.96182		% Stain 1 Positive Tissue (strong)	4.61925		% Stain 1 Positive Tissue (strong)	3.81865
		% Stain 2 Positive Tissue	48.9794		% Stain 2 Positive Tissue	14.91		% Stain 2 Positive Tissue	42.5201		% Stain 2 Positive Tissue	43.8914		% Stain 2 Positive Tissue	4.09817		% Stain 2 Positive Tissue	47.4373		% Stain 2 Positive Tissue	41.0068		% Stain 2 Positive Tissue	25.3062		33.5187
		% Stain 2 Positive Tissue (weak)	25.0257		% Stain 2 Positive Tissue (weak)	10.4461		% Stain 2 Positive Tissue (weak)	17.6729		% Stain 2 Positive Tissue (weak)	23.1718		% Stain 2 Positive Tissue (weak)	2.88123		% Stain 2 Positive Tissue (weak)	20.6302		% Stain 2 Positive Tissue (weak)	15.4773		% Stain 2 Positive Tissue (weak)	15.4987
		% Stain 2 Positive Tissue (moderate)	11.117		% Stain 2 Positive Tissue (moderate)	2.70616		% Stain 2 Positive Tissue (moderate)	9.5152		% Stain 2 Positive Tissue (moderate)	10.1603		% Stain 2 Positive Tissue (moderate)	0.629318		% Stain 2 Positive Tissue (moderate)	10.7354		% Stain 2 Positive Tissue (moderate)	9.27988		% Stain 2 Positive Tissue (moderate)	5.50424
		% Stain 2 Positive Tissue (strong)	12.8367		% Stain 2 Positive Tissue (strong)	1.75775		% Stain 2 Positive Tissue (strong)	15.332		% Stain 2 Positive Tissue (strong)	10.5592		% Stain 2 Positive Tissue (strong)	0.587627		% Stain 2 Positive Tissue (strong)	16.0718		% Stain 2 Positive Tissue (strong)	16.2496		% Stain 2 Positive Tissue (strong)	4.30323
		Stain 1 Average Positive Optical Density	0.307487		Stain 1 Average Positive Optical Density	0.308498		Stain 1 Average Positive Optical Density	0.317638		Stain 1 Average Positive Optical Density	0.299657		Stain 1 Average Positive Optical Density	0.294931		Stain 1 Average Positive Optical Density	0.346321		Stain 1 Average Positive Optical Density	0.342209		Stain 1 Average Positive Optical Density	0.300552
		Stain 2 Average Positive Optical Density	0.308332		Stain 2 Average Positive Optical Density	0.244163		Stain 2 Average Positive Optical Density	0.352702		Stain 2 Average Positive Optical Density	0.295302		Stain 2 Average Positive Optical Density	0.255485		Stain 2 Average Positive Optical Density	0.339571		Stain 2 Average Positive Optical Density	0.367418		Stain 2 Average Positive Optical Density	0.265092
		% Negative Tissue	39.1693		% Negative Tissue	67.7629		% Negative Tissue	48.0183		% Negative Tissue	46.4782		% Negative Tissue	75.7743		% Negative Tissue	39.5479		% Negative Tissue	50.6547		% Negative Tissue	63.015
		BSNA64.1f	HOM
		Name	Value		Name	Value		Name	Value		Name	Value		Name	Value		Name	Value		Name	Value		Name	Value
		Tissue Area Analyzed (μm²)	429464		Tissue Area Analyzed (μm²)	429464		Tissue Area Analyzed (μm²)	459411		Tissue Area Analyzed (μm²)	431373		Tissue Area Analyzed (μm²)	555010		Tissue Area Analyzed (μm²)	521332		Tissue Area Analyzed (μm²)	429249		Tissue Area Analyzed (μm²)	575143
		Stain 1 Area (μm²)	176826		Stain 1 Area (μm²)	176826		Stain 1 Area (μm²)	293041		Stain 1 Area (μm²)	272212		Stain 1 Area (μm²)	408213		Stain 1 Area (μm²)	417046		Stain 1 Area (μm²)	314464		Stain 1 Area (μm²)	495829
		Stain 1 Weak Area (μm²)	48442.7		Stain 1 Weak Area (μm²)	48442.7		Stain 1 Weak Area (μm²)	63566.3		Stain 1 Weak Area (μm²)	43685.6		Stain 1 Weak Area (μm²)	80141.3		Stain 1 Weak Area (μm²)	71240.1		Stain 1 Weak Area (μm²)	57438.6		Stain 1 Weak Area (μm²)	69915.7
		Stain 1 Moderate Area (μm²)	33149.4		Stain 1 Moderate Area (μm²)	33149.4		Stain 1 Moderate Area (μm²)	85428.4		Stain 1 Moderate Area (μm²)	54885.1		Stain 1 Moderate Area (μm²)	101294		Stain 1 Moderate Area (μm²)	93711.3		Stain 1 Moderate Area (μm²)	67204		Stain 1 Moderate Area (μm²)	92138.7
		Stain 1 Strong Area (μm²)	95233.7		Stain 1 Strong Area (μm²)	95233.7		Stain 1 Strong Area (μm²)	144046		Stain 1 Strong Area (μm²)	173641		Stain 1 Strong Area (μm²)	226777		Stain 1 Strong Area (μm²)	252095		Stain 1 Strong Area (μm²)	189821		Stain 1 Strong Area (μm²)	333775
		Stain 2 Area (μm²)	103402		Stain 2 Area (μm²)	103402		Stain 2 Area (μm²)	22436		Stain 2 Area (μm²)	74886.5		Stain 2 Area (μm²)	92375.4		Stain 2 Area (μm²)	31866		Stain 2 Area (μm²)	33900.5		Stain 2 Area (μm²)	29146.8
		Stain 2 Weak Area (μm²)	50280.9		Stain 2 Weak Area (μm²)	50280.9		Stain 2 Weak Area (μm²)	14600		Stain 2 Weak Area (μm²)	35205.8		Stain 2 Weak Area (μm²)	50083.5		Stain 2 Weak Area (μm²)	19245.7		Stain 2 Weak Area (μm²)	20646.3		Stain 2 Weak Area (μm²)	18436.3
		Stain 2 Moderate Area (μm²)	26122.8		Stain 2 Moderate Area (μm²)	26122.8		Stain 2 Moderate Area (μm²)	4821.81		Stain 2 Moderate Area (μm²)	18181.1		Stain 2 Moderate Area (μm²)	21244.4		Stain 2 Moderate Area (μm²)	7107.44		Stain 2 Moderate Area (μm²)	7800.23		Stain 2 Moderate Area (μm²)	7172.68
		Stain 2 Strong Area (μm²)	26998.6		Stain 2 Strong Area (μm²)	26998.6		Stain 2 Strong Area (μm²)	3014.21		Stain 2 Strong Area (μm²)	21499.6		Stain 2 Strong Area (μm²)	21047.5		Stain 2 Strong Area (μm²)	5512.87		Stain 2 Strong Area (μm²)	5453.98		Stain 2 Strong Area (μm²)	3537.84
		% Stain 1 Positive Tissue	41.1736		% Stain 1 Positive Tissue	41.1736		% Stain 1 Positive Tissue	63.7863		% Stain 1 Positive Tissue	63.1036		% Stain 1 Positive Tissue	73.5505		% Stain 1 Positive Tissue	79.9963		% Stain 1 Positive Tissue	73.2591		% Stain 1 Positive Tissue	86.2097
		% Stain 1 Positive Tissue (weak)	11.2798		% Stain 1 Positive Tissue (weak)	11.2798		% Stain 1 Positive Tissue (weak)	13.8365		% Stain 1 Positive Tissue (weak)	10.1271		% Stain 1 Positive Tissue (weak)	14.4396		% Stain 1 Positive Tissue (weak)	13.665		% Stain 1 Positive Tissue (weak)	13.3812		% Stain 1 Positive Tissue (weak)	12.1562
		% Stain 1 Positive Tissue (moderate)	7.71878		% Stain 1 Positive Tissue (moderate)	7.71878		% Stain 1 Positive Tissue (moderate)	18.5952		% Stain 1 Positive Tissue (moderate)	12.7233		% Stain 1 Positive Tissue (moderate)	18.2509		% Stain 1 Positive Tissue (moderate)	17.9754		% Stain 1 Positive Tissue (moderate)	15.6562		% Stain 1 Positive Tissue (moderate)	16.0201
		% Stain 1 Positive Tissue (strong)	22.175		% Stain 1 Positive Tissue (strong)	22.175		% Stain 1 Positive Tissue (strong)	31.3546		% Stain 1 Positive Tissue (strong)	40.2531		% Stain 1 Positive Tissue (strong)	40.86		% Stain 1 Positive Tissue (strong)	48.3559		% Stain 1 Positive Tissue (strong)	44.2218		% Stain 1 Positive Tissue (strong)	58.0334
		% Stain 2 Positive Tissue	24.077		% Stain 2 Positive Tissue	24.077		% Stain 2 Positive Tissue	4.88365		% Stain 2 Positive Tissue	17.36		% Stain 2 Positive Tissue	16.6439		% Stain 2 Positive Tissue	6.11243		% Stain 2 Positive Tissue	7.89763		% Stain 2 Positive Tissue	5.06775		13.2649
		% Stain 2 Positive Tissue (weak)	11.7078		% Stain 2 Positive Tissue (weak)	11.7078		% Stain 2 Positive Tissue (weak)	3.17798		% Stain 2 Positive Tissue (weak)	8.16133		% Stain 2 Positive Tissue (weak)	9.02388		% Stain 2 Positive Tissue (weak)	3.69164		% Stain 2 Positive Tissue (weak)	4.80986		% Stain 2 Positive Tissue (weak)	3.20551
		% Stain 2 Positive Tissue (moderate)	6.08264		% Stain 2 Positive Tissue (moderate)	6.08264		% Stain 2 Positive Tissue (moderate)	1.04957		% Stain 2 Positive Tissue (moderate)	4.2147		% Stain 2 Positive Tissue (moderate)	3.82775		% Stain 2 Positive Tissue (moderate)	1.36332		% Stain 2 Positive Tissue (moderate)	1.81718		% Stain 2 Positive Tissue (moderate)	1.24711
		% Stain 2 Positive Tissue (strong)	6.28657		% Stain 2 Positive Tissue (strong)	6.28657		% Stain 2 Positive Tissue (strong)	0.656104		% Stain 2 Positive Tissue (strong)	4.98398		% Stain 2 Positive Tissue (strong)	3.79228		% Stain 2 Positive Tissue (strong)	1.05746		% Stain 2 Positive Tissue (strong)	1.27059		% Stain 2 Positive Tissue (strong)	0.615124
		Stain 1 Average Positive Optical Density	0.494506		Stain 1 Average Positive Optical Density	0.494506		Stain 1 Average Positive Optical Density	0.40836		Stain 1 Average Positive Optical Density	0.478398		Stain 1 Average Positive Optical Density	0.434217		Stain 1 Average Positive Optical Density	0.427053		Stain 1 Average Positive Optical Density	0.449806		Stain 1 Average Positive Optical Density	0.465978
		Stain 2 Average Positive Optical Density	0.296578		Stain 2 Average Positive Optical Density	0.296578		Stain 2 Average Positive Optical Density	0.250452		Stain 2 Average Positive Optical Density	0.303006		Stain 2 Average Positive Optical Density	0.281128		Stain 2 Average Positive Optical Density	0.260713		Stain 2 Average Positive Optical Density	0.258681		Stain 2 Average Positive Optical Density	0.246389
		% Negative Tissue	43.5979		% Negative Tissue	43.5979		% Negative Tissue	32.6435		% Negative Tissue	25.7723		% Negative Tissue	16.252		% Negative Tissue	15.9151		% Negative Tissue	21.8039		% Negative Tissue	10.5514
		BSNA47.1a	WT
		Name	Value		Name	Value		Name	Value		Name	Value		Name	Value		Name	Value		Name	Value		Name	Value
		Tissue Area Analyzed (μm²)	988915		Tissue Area Analyzed (μm²)	489480		Tissue Area Analyzed (μm²)	1.05222e+06		Tissue Area Analyzed (μm²)	1022164		Tissue Area Analyzed (μm²)	1.03058e+06		Tissue Area Analyzed (μm²)	1.00125e+06		Tissue Area Analyzed (μm²)	836876		Tissue Area Analyzed (μm²)	626775
		Stain 1 Area (μm²)	255314		Stain 1 Area (μm²)	96513.6		Stain 1 Area (μm²)	305511		Stain 1 Area (μm²)	285002		Stain 1 Area (μm²)	371725		Stain 1 Area (μm²)	310848		Stain 1 Area (μm²)	281771		Stain 1 Area (μm²)	264916
		Stain 1 Weak Area (μm²)	78210.1		Stain 1 Weak Area (μm²)	34211.1		Stain 1 Weak Area (μm²)	94624.6		Stain 1 Weak Area (μm²)	88185.7		Stain 1 Weak Area (μm²)	117082		Stain 1 Weak Area (μm²)	100498		Stain 1 Weak Area (μm²)	90865.1		Stain 1 Weak Area (μm²)	86355
		Stain 1 Moderate Area (μm²)	53598.8		Stain 1 Moderate Area (μm²)	21552.7		Stain 1 Moderate Area (μm²)	66823		Stain 1 Moderate Area (μm²)	60359.3		Stain 1 Moderate Area (μm²)	80623.9		Stain 1 Moderate Area (μm²)	69430.8		Stain 1 Moderate Area (μm²)	62557.2		Stain 1 Moderate Area (μm²)	68134.7
		Stain 1 Strong Area (μm²)	123505		Stain 1 Strong Area (μm²)	40749.9		Stain 1 Strong Area (μm²)	144064		Stain 1 Strong Area (μm²)	136457		Stain 1 Strong Area (μm²)	174019		Stain 1 Strong Area (μm²)	140919		Stain 1 Strong Area (μm²)	128349		Stain 1 Strong Area (μm²)	110427
		Stain 2 Area (μm²)	108549		Stain 2 Area (μm²)	131185		Stain 2 Area (μm²)	344688		Stain 2 Area (μm²)	155860		Stain 2 Area (μm²)	56661.5		Stain 2 Area (μm²)	100978		Stain 2 Area (μm²)	73943.7		Stain 2 Area (μm²)	24424.9
		Stain 2 Weak Area (μm²)	55698.5		Stain 2 Weak Area (μm²)	92496.6		Stain 2 Weak Area (μm²)	167212		Stain 2 Weak Area (μm²)	85220		Stain 2 Weak Area (μm²)	47232.1		Stain 2 Weak Area (μm²)	75794.6		Stain 2 Weak Area (μm²)	59244.5		Stain 2 Weak Area (μm²)	21114.5
		Stain 2 Moderate Area (μm²)	23142.1		Stain 2 Moderate Area (μm²)	25832.4		Stain 2 Moderate Area (μm²)	92937.7		Stain 2 Moderate Area (μm²)	33974.4		Stain 2 Moderate Area (μm²)	7221.17		Stain 2 Moderate Area (μm²)	17757.9		Stain 2 Moderate Area (μm²)	11080.6		Stain 2 Moderate Area (μm²)	2869.3
		Stain 2 Strong Area (μm²)	29708.5		Stain 2 Strong Area (μm²)	12856.4		Stain 2 Strong Area (μm²)	84538.8		Stain 2 Strong Area (μm²)	36665.3		Stain 2 Strong Area (μm²)	2208.27		Stain 2 Strong Area (μm²)	7425.55		Stain 2 Strong Area (μm²)	3618.67		Stain 2 Strong Area (μm²)	441.076
		% Stain 1 Positive Tissue	25.8176		% Stain 1 Positive Tissue	19.7176		% Stain 1 Positive Tissue	29.0348		% Stain 1 Positive Tissue	27.8822		% Stain 1 Positive Tissue	36.0694		% Stain 1 Positive Tissue	31.0459		% Stain 1 Positive Tissue	33.6694		% Stain 1 Positive Tissue	42.2666
		% Stain 1 Positive Tissue (weak)	7.90869		% Stain 1 Positive Tissue (weak)	6.98927		% Stain 1 Positive Tissue (weak)	8.99282		% Stain 1 Positive Tissue (weak)	8.62736		% Stain 1 Positive Tissue (weak)	11.3608		% Stain 1 Positive Tissue (weak)	10.0373		% Stain 1 Positive Tissue (weak)	10.8576		% Stain 1 Positive Tissue (weak)	13.7777
		% Stain 1 Positive Tissue (moderate)	5.41996		% Stain 1 Positive Tissue (moderate)	4.40318		% Stain 1 Positive Tissue (moderate)	6.35064		% Stain 1 Positive Tissue (moderate)	5.90505		% Stain 1 Positive Tissue (moderate)	7.82316		% Stain 1 Positive Tissue (moderate)	6.9344		% Stain 1 Positive Tissue (moderate)	7.47508		% Stain 1 Positive Tissue (moderate)	10.8707
		% Stain 1 Positive Tissue (strong)	12.489		% Stain 1 Positive Tissue (strong)	8.32514		% Stain 1 Positive Tissue (strong)	13.6914		% Stain 1 Positive Tissue (strong)	13.3498		% Stain 1 Positive Tissue (strong)	16.8855		% Stain 1 Positive Tissue (strong)	14.0742		% Stain 1 Positive Tissue (strong)	15.3367		% Stain 1 Positive Tissue (strong)	17.6182
		% Stain 2 Positive Tissue	10.9766		% Stain 2 Positive Tissue	26.801		% Stain 2 Positive Tissue	32.7581		% Stain 2 Positive Tissue	15.248		% Stain 2 Positive Tissue	5.49802		% Stain 2 Positive Tissue	10.0852		% Stain 2 Positive Tissue	8.83568		% Stain 2 Positive Tissue	3.89691		14.2624
		% Stain 2 Positive Tissue (weak)	5.63229		% Stain 2 Positive Tissue (weak)	18.8969		% Stain 2 Positive Tissue (weak)	15.8913		% Stain 2 Positive Tissue (weak)	8.33722		% Stain 2 Positive Tissue (weak)	4.58305		% Stain 2 Positive Tissue (weak)	7.56998		% Stain 2 Positive Tissue (weak)	7.07924		% Stain 2 Positive Tissue (weak)	3.36875
		% Stain 2 Positive Tissue (moderate)	2.34015		% Stain 2 Positive Tissue (moderate)	5.27752		% Stain 2 Positive Tissue (moderate)	8.8325		% Stain 2 Positive Tissue (moderate)	3.32377		% Stain 2 Positive Tissue (moderate)	0.70069		% Stain 2 Positive Tissue (moderate)	1.77357		% Stain 2 Positive Tissue (moderate)	1.32404		% Stain 2 Positive Tissue (moderate)	0.457789
		% Stain 2 Positive Tissue (strong)	3.00416		% Stain 2 Positive Tissue (strong)	2.62655		% Stain 2 Positive Tissue (strong)	8.03429		% Stain 2 Positive Tissue (strong)	3.58703		% Stain 2 Positive Tissue (strong)	0.214274		% Stain 2 Positive Tissue (strong)	0.741626		% Stain 2 Positive Tissue (strong)	0.432402		% Stain 2 Positive Tissue (strong)	0.070372
		Stain 1 Average Positive Optical Density	0.395454		Stain 1 Average Positive Optical Density	0.35926		Stain 1 Average Positive Optical Density	0.393071		Stain 1 Average Positive Optical Density	0.392097		Stain 1 Average Positive Optical Density	0.384661		Stain 1 Average Positive Optical Density	0.377292		Stain 1 Average Positive Optical Density	0.375494		Stain 1 Average Positive Optical Density	0.37292
		Stain 2 Average Positive Optical Density	0.311941		Stain 2 Average Positive Optical Density	0.234513		Stain 2 Average Positive Optical Density	0.286842		Stain 2 Average Positive Optical Density	0.295453		Stain 2 Average Positive Optical Density	0.207025		Stain 2 Average Positive Optical Density	0.22486		Stain 2 Average Positive Optical Density	0.213439		Stain 2 Average Positive Optical Density	0.20178
		% Negative Tissue	64.5538		% Negative Tissue	57.7361		% Negative Tissue	46.2408		% Negative Tissue	59.4823		% Negative Tissue	60.0446		% Negative Tissue	61.5904		% Negative Tissue	59.496		% Negative Tissue	55.0339
		BSNA54.1d	WT
		Name	Value		Name	Value		Name	Value		Name	Value		Name	Value		Name	Value		Name	Value		Name	Value
		Tissue Area Analyzed (μm²)	787754		Tissue Area Analyzed (μm²)	1.08271e+06		Tissue Area Analyzed (μm²)	545908		Tissue Area Analyzed (μm²)	1.11169e+06		Tissue Area Analyzed (μm²)	938365		Tissue Area Analyzed (μm²)	832239		Tissue Area Analyzed (μm²)	776191		Tissue Area Analyzed (μm²)	733086
		Stain 1 Area (μm²)	236514		Stain 1 Area (μm²)	289924		Stain 1 Area (μm²)	190924		Stain 1 Area (μm²)	563460		Stain 1 Area (μm²)	348515		Stain 1 Area (μm²)	368943		Stain 1 Area (μm²)	272278		Stain 1 Area (μm²)	168237
		Stain 1 Weak Area (μm²)	78005.8		Stain 1 Weak Area (μm²)	97169.5		Stain 1 Weak Area (μm²)	54135.1		Stain 1 Weak Area (μm²)	199176		Stain 1 Weak Area (μm²)	108344		Stain 1 Weak Area (μm²)	106582		Stain 1 Weak Area (μm²)	93542.7		Stain 1 Weak Area (μm²)	51709.2
		Stain 1 Moderate Area (μm²)	52064.3		Stain 1 Moderate Area (μm²)	67949.9		Stain 1 Moderate Area (μm²)	35335.7		Stain 1 Moderate Area (μm²)	152261		Stain 1 Moderate Area (μm²)	74058.6		Stain 1 Moderate Area (μm²)	66145.8		Stain 1 Moderate Area (μm²)	61634.6		Stain 1 Moderate Area (μm²)	35715.6
		Stain 1 Strong Area (μm²)	106444		Stain 1 Strong Area (μm²)	124804		Stain 1 Strong Area (μm²)	101453		Stain 1 Strong Area (μm²)	212022		Stain 1 Strong Area (μm²)	166112		Stain 1 Strong Area (μm²)	196215		Stain 1 Strong Area (μm²)	117101		Stain 1 Strong Area (μm²)	80812.1
		Stain 2 Area (μm²)	112091		Stain 2 Area (μm²)	254058		Stain 2 Area (μm²)	105471		Stain 2 Area (μm²)	101665		Stain 2 Area (μm²)	105989		Stain 2 Area (μm²)	148930		Stain 2 Area (μm²)	65722		Stain 2 Area (μm²)	199264
		Stain 2 Weak Area (μm²)	62857.4		Stain 2 Weak Area (μm²)	132077		Stain 2 Weak Area (μm²)	72888.4		Stain 2 Weak Area (μm²)	62624.7		Stain 2 Weak Area (μm²)	64529.3		Stain 2 Weak Area (μm²)	81599		Stain 2 Weak Area (μm²)	39037.5		Stain 2 Weak Area (μm²)	107670
		Stain 2 Moderate Area (μm²)	27208.1		Stain 2 Moderate Area (μm²)	56034.5		Stain 2 Moderate Area (μm²)	18334.1		Stain 2 Moderate Area (μm²)	26095.6		Stain 2 Moderate Area (μm²)	21982.8		Stain 2 Moderate Area (μm²)	31431.9		Stain 2 Moderate Area (μm²)	14341.9		Stain 2 Moderate Area (μm²)	44689.5
		Stain 2 Strong Area (μm²)	22025.5		Stain 2 Strong Area (μm²)	65946.6		Stain 2 Strong Area (μm²)	14248.9		Stain 2 Strong Area (μm²)	12944.2		Stain 2 Strong Area (μm²)	19476.6		Stain 2 Strong Area (μm²)	35898.6		Stain 2 Strong Area (μm²)	12342.6		Stain 2 Strong Area (μm²)	46904.2
		% Stain 1 Positive Tissue	30.0239		% Stain 1 Positive Tissue	26.7775		% Stain 1 Positive Tissue	34.9736		% Stain 1 Positive Tissue	50.6851		% Stain 1 Positive Tissue	37.1406		% Stain 1 Positive Tissue	44.3314		% Stain 1 Positive Tissue	35.0788		% Stain 1 Positive Tissue	22.9492
		% Stain 1 Positive Tissue (weak)	9.90231		% Stain 1 Positive Tissue (weak)	8.97463		% Stain 1 Positive Tissue (weak)	9.91653		% Stain 1 Positive Tissue (weak)	17.9166		% Stain 1 Positive Tissue (weak)	11.5461		% Stain 1 Positive Tissue (weak)	12.8067		% Stain 1 Positive Tissue (weak)	12.0515		% Stain 1 Positive Tissue (weak)	7.05364
		% Stain 1 Positive Tissue (moderate)	6.60921		% Stain 1 Positive Tissue (moderate)	6.2759		% Stain 1 Positive Tissue (moderate)	6.47283		% Stain 1 Positive Tissue (moderate)	13.6964		% Stain 1 Positive Tissue (moderate)	7.89231		% Stain 1 Positive Tissue (moderate)	7.94794		% Stain 1 Positive Tissue (moderate)	7.94065		% Stain 1 Positive Tissue (moderate)	4.87196
		% Stain 1 Positive Tissue (strong)	13.5124		% Stain 1 Positive Tissue (strong)	11.527		% Stain 1 Positive Tissue (strong)	18.5842		% Stain 1 Positive Tissue (strong)	19.0721		% Stain 1 Positive Tissue (strong)	17.7023		% Stain 1 Positive Tissue (strong)	23.5768		% Stain 1 Positive Tissue (strong)	15.0866		% Stain 1 Positive Tissue (strong)	11.0236
		% Stain 2 Positive Tissue	14.2292		% Stain 2 Positive Tissue	23.4649		% Stain 2 Positive Tissue	19.3204		% Stain 2 Positive Tissue	9.14507		% Stain 2 Positive Tissue	11.295		% Stain 2 Positive Tissue	17.895		% Stain 2 Positive Tissue	8.46725		% Stain 2 Positive Tissue	27.1815		16.3748
		% Stain 2 Positive Tissue (weak)	7.97932		% Stain 2 Positive Tissue (weak)	12.1987		% Stain 2 Positive Tissue (weak)	13.3518		% Stain 2 Positive Tissue (weak)	5.6333		% Stain 2 Positive Tissue (weak)	6.87678		% Stain 2 Positive Tissue (weak)	9.80476		% Stain 2 Positive Tissue (weak)	5.02937		% Stain 2 Positive Tissue (weak)	14.6872
		% Stain 2 Positive Tissue (moderate)	3.45389		% Stain 2 Positive Tissue (moderate)	5.17538		% Stain 2 Positive Tissue (moderate)	3.35846		% Stain 2 Positive Tissue (moderate)	2.34739		% Stain 2 Positive Tissue (moderate)	2.34267		% Stain 2 Positive Tissue (moderate)	3.77678		% Stain 2 Positive Tissue (moderate)	1.84773		% Stain 2 Positive Tissue (moderate)	6.09609
		% Stain 2 Positive Tissue (strong)	2.79599		% Stain 2 Positive Tissue (strong)	6.09087		% Stain 2 Positive Tissue (strong)	2.61014		% Stain 2 Positive Tissue (strong)	1.16437		% Stain 2 Positive Tissue (strong)	2.07559		% Stain 2 Positive Tissue (strong)	4.3135		% Stain 2 Positive Tissue (strong)	1.59015		% Stain 2 Positive Tissue (strong)	6.39818
		Stain 1 Average Positive Optical Density	0.375998		Stain 1 Average Positive Optical Density	0.361056		Stain 1 Average Positive Optical Density	0.424681		Stain 1 Average Positive Optical Density	0.3721		Stain 1 Average Positive Optical Density	0.396643		Stain 1 Average Positive Optical Density	0.460045		Stain 1 Average Positive Optical Density	0.379405		Stain 1 Average Positive Optical Density	0.395512
		Stain 2 Average Positive Optical Density	0.272842		Stain 2 Average Positive Optical Density	0.303187		Stain 2 Average Positive Optical Density	0.250711		Stain 2 Average Positive Optical Density	0.253375		Stain 2 Average Positive Optical Density	0.269648		Stain 2 Average Positive Optical Density	0.29423		Stain 2 Average Positive Optical Density	0.2697		Stain 2 Average Positive Optical Density	0.291183
		% Negative Tissue	58.6218		% Negative Tissue	52.7161		% Negative Tissue	48.1411		% Negative Tissue	42.3053		% Negative Tissue	53.4331		% Negative Tissue	43.4788		% Negative Tissue	58.0928		% Negative Tissue	54.1953
		BSNA53.2a
		Name	Value		Name	Value		Name	Value		Name	Value		Name	Value		Name	Value		Name	Value		Name	Value
		Tissue Area Analyzed (μm²)	657023		Tissue Area Analyzed (μm²)	551214		Tissue Area Analyzed (μm²)	677766		Tissue Area Analyzed (μm²)	594444		Tissue Area Analyzed (μm²)	610369		Tissue Area Analyzed (μm²)	1.06942e+06		Tissue Area Analyzed (μm²)	1052025		Tissue Area Analyzed (μm²)	1.16155e+06
		Stain 1 Area (μm²)	312654		Stain 1 Area (μm²)	288213		Stain 1 Area (μm²)	345973		Stain 1 Area (μm²)	280046		Stain 1 Area (μm²)	476820		Stain 1 Area (μm²)	663452		Stain 1 Area (μm²)	583430		Stain 1 Area (μm²)	621228
		Stain 1 Weak Area (μm²)	100482		Stain 1 Weak Area (μm²)	80009.7		Stain 1 Weak Area (μm²)	149022		Stain 1 Weak Area (μm²)	105384		Stain 1 Weak Area (μm²)	64480.8		Stain 1 Weak Area (μm²)	279166		Stain 1 Weak Area (μm²)	310257		Stain 1 Weak Area (μm²)	293833
		Stain 1 Moderate Area (μm²)	82129		Stain 1 Moderate Area (μm²)	88234.2		Stain 1 Moderate Area (μm²)	87859.6		Stain 1 Moderate Area (μm²)	85257.6		Stain 1 Moderate Area (μm²)	81938.5		Stain 1 Moderate Area (μm²)	214502		Stain 1 Moderate Area (μm²)	151406		Stain 1 Moderate Area (μm²)	156239
		Stain 1 Strong Area (μm²)	130044		Stain 1 Strong Area (μm²)	119969		Stain 1 Strong Area (μm²)	109091		Stain 1 Strong Area (μm²)	89404.5		Stain 1 Strong Area (μm²)	330401		Stain 1 Strong Area (μm²)	169783		Stain 1 Strong Area (μm²)	121767		Stain 1 Strong Area (μm²)	171157
		Stain 2 Area (μm²)	138796		Stain 2 Area (μm²)	49092.8		Stain 2 Area (μm²)	94066.4		Stain 2 Area (μm²)	136250		Stain 2 Area (μm²)	21033.7		Stain 2 Area (μm²)	69297.4		Stain 2 Area (μm²)	129280		Stain 2 Area (μm²)	164727
		Stain 2 Weak Area (μm²)	62478.6		Stain 2 Weak Area (μm²)	30242.6		Stain 2 Weak Area (μm²)	44996.1		Stain 2 Weak Area (μm²)	57977.2		Stain 2 Weak Area (μm²)	13195.9		Stain 2 Weak Area (μm²)	38541		Stain 2 Weak Area (μm²)	71953.1		Stain 2 Weak Area (μm²)	85422.1
		Stain 2 Moderate Area (μm²)	30675.6		Stain 2 Moderate Area (μm²)	10684		Stain 2 Moderate Area (μm²)	19549.9		Stain 2 Moderate Area (μm²)	31329.1		Stain 2 Moderate Area (μm²)	4198.3		Stain 2 Moderate Area (μm²)	16181.8		Stain 2 Moderate Area (μm²)	27336.3		Stain 2 Moderate Area (μm²)	33674.2
		Stain 2 Strong Area (μm²)	45642.1		Stain 2 Strong Area (μm²)	8166.25		Stain 2 Strong Area (μm²)	29520.3		Stain 2 Strong Area (μm²)	46943.4		Stain 2 Strong Area (μm²)	3639.45		Stain 2 Strong Area (μm²)	14574.6		Stain 2 Strong Area (μm²)	29990.3		Stain 2 Strong Area (μm²)	45630.6
		% Stain 1 Positive Tissue	47.5865		% Stain 1 Positive Tissue	52.2869		% Stain 1 Positive Tissue	51.046		% Stain 1 Positive Tissue	47.1106		% Stain 1 Positive Tissue	78.12		% Stain 1 Positive Tissue	62.0385		% Stain 1 Positive Tissue	55.4578		% Stain 1 Positive Tissue	53.4829
		% Stain 1 Positive Tissue (weak)	15.2935		% Stain 1 Positive Tissue (weak)	14.5152		% Stain 1 Positive Tissue (weak)	21.9873		% Stain 1 Positive Tissue (weak)	17.7282		% Stain 1 Positive Tissue (weak)	10.5642		% Stain 1 Positive Tissue (weak)	26.1045		% Stain 1 Positive Tissue (weak)	29.4914		% Stain 1 Positive Tissue (weak)	25.2967
		% Stain 1 Positive Tissue (moderate)	12.5002		% Stain 1 Positive Tissue (moderate)	16.0072		% Stain 1 Positive Tissue (moderate)	12.9631		% Stain 1 Positive Tissue (moderate)	14.3424		% Stain 1 Positive Tissue (moderate)	13.4244		% Stain 1 Positive Tissue (moderate)	20.0578		% Stain 1 Positive Tissue (moderate)	14.3918		% Stain 1 Positive Tissue (moderate)	13.451
		% Stain 1 Positive Tissue (strong)	19.7928		% Stain 1 Positive Tissue (strong)	21.7645		% Stain 1 Positive Tissue (strong)	16.0956		% Stain 1 Positive Tissue (strong)	15.04		% Stain 1 Positive Tissue (strong)	54.1314		% Stain 1 Positive Tissue (strong)	15.8762		% Stain 1 Positive Tissue (strong)	11.5745		% Stain 1 Positive Tissue (strong)	14.7352
		% Stain 2 Positive Tissue	21.125		% Stain 2 Positive Tissue	8.9063		% Stain 2 Positive Tissue	13.8789		% Stain 2 Positive Tissue	22.9205		% Stain 2 Positive Tissue	3.44606		% Stain 2 Positive Tissue	6.47991		% Stain 2 Positive Tissue	12.2887		% Stain 2 Positive Tissue	14.1817		12.9034
		% Stain 2 Positive Tissue (weak)	9.50935		% Stain 2 Positive Tissue (weak)	5.48653		% Stain 2 Positive Tissue (weak)	6.63888		% Stain 2 Positive Tissue (weak)	9.75318		% Stain 2 Positive Tissue (weak)	2.16196		% Stain 2 Positive Tissue (weak)	3.60392		% Stain 2 Positive Tissue (weak)	6.83949		% Stain 2 Positive Tissue (weak)	7.35417
		% Stain 2 Positive Tissue (moderate)	4.66887		% Stain 2 Positive Tissue (moderate)	1.93826		% Stain 2 Positive Tissue (moderate)	2.88447		% Stain 2 Positive Tissue (moderate)	5.27031		% Stain 2 Positive Tissue (moderate)	0.687831		% Stain 2 Positive Tissue (moderate)	1.51314		% Stain 2 Positive Tissue (moderate)	2.59845		% Stain 2 Positive Tissue (moderate)	2.89908
		% Stain 2 Positive Tissue (strong)	6.94681		% Stain 2 Positive Tissue (strong)	1.4815		% Stain 2 Positive Tissue (strong)	4.35553		% Stain 2 Positive Tissue (strong)	7.89702		% Stain 2 Positive Tissue (strong)	0.596271		% Stain 2 Positive Tissue (strong)	1.36285		% Stain 2 Positive Tissue (strong)	2.85072		% Stain 2 Positive Tissue (strong)	3.92843
		Stain 1 Average Positive Optical Density	0.387011		Stain 1 Average Positive Optical Density	0.386637		Stain 1 Average Positive Optical Density	0.370427		Stain 1 Average Positive Optical Density	0.355148		Stain 1 Average Positive Optical Density	0.486774		Stain 1 Average Positive Optical Density	0.348287		Stain 1 Average Positive Optical Density	0.314795		Stain 1 Average Positive Optical Density	0.347301
		Stain 2 Average Positive Optical Density	0.336772		Stain 2 Average Positive Optical Density	0.264421		Stain 2 Average Positive Optical Density	0.33086		Stain 2 Average Positive Optical Density	0.330337		Stain 2 Average Positive Optical Density	0.259992		Stain 2 Average Positive Optical Density	0.287945		Stain 2 Average Positive Optical Density	0.288826		Stain 2 Average Positive Optical Density	0.313567
		% Negative Tissue	36.9049		% Negative Tissue	41.1775		% Negative Tissue	38.3605		% Negative Tissue	34.7935		% Negative Tissue	19.733		% Negative Tissue	33.1992		% Negative Tissue	35.3442		% Negative Tissue	36.0492
		BSNA71.1d	WT
		Name	Value		Name	Value		Name	Value		Name	Value		Name	Value		Name	Value		Name	Value		Name	Value
		Tissue Area Analyzed (μm²)	639667		Tissue Area Analyzed (μm²)	511276		Tissue Area Analyzed (μm²)	520878		Tissue Area Analyzed (μm²)	632805		Tissue Area Analyzed (μm²)	655554		Tissue Area Analyzed (μm²)	641416		Tissue Area Analyzed (μm²)	496035		Tissue Area Analyzed (μm²)	378279
		Stain 1 Area (μm²)	254433		Stain 1 Area (μm²)	334131		Stain 1 Area (μm²)	167413		Stain 1 Area (μm²)	312611		Stain 1 Area (μm²)	364702		Stain 1 Area (μm²)	464928		Stain 1 Area (μm²)	164845		Stain 1 Area (μm²)	208802
		Stain 1 Weak Area (μm²)	100696		Stain 1 Weak Area (μm²)	110465		Stain 1 Weak Area (μm²)	58309.2		Stain 1 Weak Area (μm²)	102033		Stain 1 Weak Area (μm²)	122861		Stain 1 Weak Area (μm²)	145518		Stain 1 Weak Area (μm²)	52374.9		Stain 1 Weak Area (μm²)	69778.9
		Stain 1 Moderate Area (μm²)	56628		Stain 1 Moderate Area (μm²)	92455.1		Stain 1 Moderate Area (μm²)	36356.4		Stain 1 Moderate Area (μm²)	73022.9		Stain 1 Moderate Area (μm²)	88579.5		Stain 1 Moderate Area (μm²)	139595		Stain 1 Moderate Area (μm²)	32002.8		Stain 1 Moderate Area (μm²)	49282.2
		Stain 1 Strong Area (μm²)	97108.9		Stain 1 Strong Area (μm²)	131210		Stain 1 Strong Area (μm²)	72747.5		Stain 1 Strong Area (μm²)	137554		Stain 1 Strong Area (μm²)	153261		Stain 1 Strong Area (μm²)	179814		Stain 1 Strong Area (μm²)	80466.9		Stain 1 Strong Area (μm²)	89741.1
		Stain 2 Area (μm²)	158254		Stain 2 Area (μm²)	96363.5		Stain 2 Area (μm²)	148286		Stain 2 Area (μm²)	37173.9		Stain 2 Area (μm²)	23579.7		Stain 2 Area (μm²)	39478		Stain 2 Area (μm²)	24025.9		Stain 2 Area (μm²)	13587.9
		Stain 2 Weak Area (μm²)	87131.5		Stain 2 Weak Area (μm²)	64450.8		Stain 2 Weak Area (μm²)	79194.5		Stain 2 Weak Area (μm²)	23278.9		Stain 2 Weak Area (μm²)	16172		Stain 2 Weak Area (μm²)	27696.6		Stain 2 Weak Area (μm²)	17408.6		Stain 2 Weak Area (μm²)	8105.64
		Stain 2 Moderate Area (μm²)	34855.4		Stain 2 Moderate Area (μm²)	19482.4		Stain 2 Moderate Area (μm²)	34090.4		Stain 2 Moderate Area (μm²)	7589.51		Stain 2 Moderate Area (μm²)	3983.54		Stain 2 Moderate Area (μm²)	7892.6		Stain 2 Moderate Area (μm²)	4121.52		Stain 2 Moderate Area (μm²)	3146.42
		Stain 2 Strong Area (μm²)	36267.5		Stain 2 Strong Area (μm²)	12430.4		Stain 2 Strong Area (μm²)	35000.9		Stain 2 Strong Area (μm²)	6305.54		Stain 2 Strong Area (μm²)	3424.11		Stain 2 Strong Area (μm²)	3888.86		Stain 2 Strong Area (μm²)	2495.77		Stain 2 Strong Area (μm²)	2335.85
		% Stain 1 Positive Tissue	39.7758		% Stain 1 Positive Tissue	65.3523		% Stain 1 Positive Tissue	32.1406		% Stain 1 Positive Tissue	49.4008		% Stain 1 Positive Tissue	55.6326		% Stain 1 Positive Tissue	72.4846		% Stain 1 Positive Tissue	33.2325		% Stain 1 Positive Tissue	55.1979
		% Stain 1 Positive Tissue (weak)	15.7419		% Stain 1 Positive Tissue (weak)	21.6058		% Stain 1 Positive Tissue (weak)	11.1944		% Stain 1 Positive Tissue (weak)	16.124		% Stain 1 Positive Tissue (weak)	18.7416		% Stain 1 Positive Tissue (weak)	22.687		% Stain 1 Positive Tissue (weak)	10.5587		% Stain 1 Positive Tissue (weak)	18.4464
		% Stain 1 Positive Tissue (moderate)	8.85273		% Stain 1 Positive Tissue (moderate)	18.0832		% Stain 1 Positive Tissue (moderate)	6.97984		% Stain 1 Positive Tissue (moderate)	11.5395		% Stain 1 Positive Tissue (moderate)	13.5122		% Stain 1 Positive Tissue (moderate)	21.7636		% Stain 1 Positive Tissue (moderate)	6.45173		% Stain 1 Positive Tissue (moderate)	13.028
		% Stain 1 Positive Tissue (strong)	15.1811		% Stain 1 Positive Tissue (strong)	25.6633		% Stain 1 Positive Tissue (strong)	13.9663		% Stain 1 Positive Tissue (strong)	21.7372		% Stain 1 Positive Tissue (strong)	23.3789		% Stain 1 Positive Tissue (strong)	28.0339		% Stain 1 Positive Tissue (strong)	16.222		% Stain 1 Positive Tissue (strong)	23.7235
		% Stain 2 Positive Tissue	24.7401		% Stain 2 Positive Tissue	18.8476		% Stain 2 Positive Tissue	28.4684		% Stain 2 Positive Tissue	5.87446		% Stain 2 Positive Tissue	3.59691		% Stain 2 Positive Tissue	6.15483		% Stain 2 Positive Tissue	4.8436		% Stain 2 Positive Tissue	3.59203		12.0148
		% Stain 2 Positive Tissue (weak)	13.6214		% Stain 2 Positive Tissue (weak)	12.6059		% Stain 2 Positive Tissue (weak)	15.204		% Stain 2 Positive Tissue (weak)	3.67868		% Stain 2 Positive Tissue (weak)	2.46692		% Stain 2 Positive Tissue (weak)	4.31804		% Stain 2 Positive Tissue (weak)	3.50956		% Stain 2 Positive Tissue (weak)	2.14277
		% Stain 2 Positive Tissue (moderate)	5.44899		% Stain 2 Positive Tissue (moderate)	3.81054		% Stain 2 Positive Tissue (moderate)	6.54481		% Stain 2 Positive Tissue (moderate)	1.19934		% Stain 2 Positive Tissue (moderate)	0.60766		% Stain 2 Positive Tissue (moderate)	1.2305		% Stain 2 Positive Tissue (moderate)	0.830893		% Stain 2 Positive Tissue (moderate)	0.831772
		% Stain 2 Positive Tissue (strong)	5.66975		% Stain 2 Positive Tissue (strong)	2.43124		% Stain 2 Positive Tissue (strong)	6.71959		% Stain 2 Positive Tissue (strong)	0.996442		% Stain 2 Positive Tissue (strong)	0.522324		% Stain 2 Positive Tissue (strong)	0.606293		% Stain 2 Positive Tissue (strong)	0.503145		% Stain 2 Positive Tissue (strong)	0.617495
		Stain 1 Average Positive Optical Density	0.361909		Stain 1 Average Positive Optical Density	0.380077		Stain 1 Average Positive Optical Density	0.373343		Stain 1 Average Positive Optical Density	0.397205		Stain 1 Average Positive Optical Density	0.39835		Stain 1 Average Positive Optical Density	0.389504		Stain 1 Average Positive Optical Density	0.420531		Stain 1 Average Positive Optical Density	0.413923
		Stain 2 Average Positive Optical Density	0.289572		Stain 2 Average Positive Optical Density	0.249993		Stain 2 Average Positive Optical Density	0.288557		Stain 2 Average Positive Optical Density	0.267317		Stain 2 Average Positive Optical Density	0.253082		Stain 2 Average Positive Optical Density	0.237196		Stain 2 Average Positive Optical Density	0.236605		Stain 2 Average Positive Optical Density	0.26099
		% Negative Tissue	40.7489		% Negative Tissue	21.4064		% Negative Tissue	46.5108		% Negative Tissue	46.6005		% Negative Tissue	41.916		% Negative Tissue	23.0833		% Negative Tissue	63.8852		% Negative Tissue	42.3228
		BSNA80.1g	WT
		Name	Value		Name	Value		Name	Value		Name	Value		Name	Value		Name	Value		Name	Value		Name	Value
		Tissue Area Analyzed (μm²)	838124		Tissue Area Analyzed (μm²)	790052		Tissue Area Analyzed (μm²)	840317		Tissue Area Analyzed (μm²)	530273		Tissue Area Analyzed (μm²)	697016		Tissue Area Analyzed (μm²)	630606		Tissue Area Analyzed (μm²)	1338468		Tissue Area Analyzed (μm²)	996491
		Stain 1 Area (μm²)	109060		Stain 1 Area (μm²)	161895		Stain 1 Area (μm²)	368944		Stain 1 Area (μm²)	326752		Stain 1 Area (μm²)	463691		Stain 1 Area (μm²)	185213		Stain 1 Area (μm²)	873765		Stain 1 Area (μm²)	671330
		Stain 1 Weak Area (μm²)	38773.1		Stain 1 Weak Area (μm²)	55360.8		Stain 1 Weak Area (μm²)	165955		Stain 1 Weak Area (μm²)	104832		Stain 1 Weak Area (μm²)	144911		Stain 1 Weak Area (μm²)	90872.6		Stain 1 Weak Area (μm²)	334260		Stain 1 Weak Area (μm²)	265441
		Stain 1 Moderate Area (μm²)	26406.2		Stain 1 Moderate Area (μm²)	38225.8		Stain 1 Moderate Area (μm²)	93717.7		Stain 1 Moderate Area (μm²)	134446		Stain 1 Moderate Area (μm²)	178138		Stain 1 Moderate Area (μm²)	48376.9		Stain 1 Moderate Area (μm²)	348070		Stain 1 Moderate Area (μm²)	267971
		Stain 1 Strong Area (μm²)	43880.7		Stain 1 Strong Area (μm²)	68308.5		Stain 1 Strong Area (μm²)	109271		Stain 1 Strong Area (μm²)	87473.9		Stain 1 Strong Area (μm²)	140643		Stain 1 Strong Area (μm²)	45963.7		Stain 1 Strong Area (μm²)	191435		Stain 1 Strong Area (μm²)	137918
		Stain 2 Area (μm²)	565904		Stain 2 Area (μm²)	230841		Stain 2 Area (μm²)	83847.1		Stain 2 Area (μm²)	109389		Stain 2 Area (μm²)	55601		Stain 2 Area (μm²)	171879		Stain 2 Area (μm²)	129205		Stain 2 Area (μm²)	96353.1
		Stain 2 Weak Area (μm²)	172596		Stain 2 Weak Area (μm²)	140249		Stain 2 Weak Area (μm²)	54086.1		Stain 2 Weak Area (μm²)	36283.1		Stain 2 Weak Area (μm²)	30954.4		Stain 2 Weak Area (μm²)	89302.3		Stain 2 Weak Area (μm²)	68274.4		Stain 2 Weak Area (μm²)	53275.5
		Stain 2 Moderate Area (μm²)	122199		Stain 2 Moderate Area (μm²)	50716.8		Stain 2 Moderate Area (μm²)	18862.9		Stain 2 Moderate Area (μm²)	26661.4		Stain 2 Moderate Area (μm²)	12067.2		Stain 2 Moderate Area (μm²)	42004.4		Stain 2 Moderate Area (μm²)	29637		Stain 2 Moderate Area (μm²)	22434.8
		Stain 2 Strong Area (μm²)	271108		Stain 2 Strong Area (μm²)	39875.2		Stain 2 Strong Area (μm²)	10898.2		Stain 2 Strong Area (μm²)	46444		Stain 2 Strong Area (μm²)	12579.3		Stain 2 Strong Area (μm²)	40572.1		Stain 2 Strong Area (μm²)	31293.9		Stain 2 Strong Area (μm²)	20642.8
		% Stain 1 Positive Tissue	13.0124		% Stain 1 Positive Tissue	20.4917		% Stain 1 Positive Tissue	43.9053		% Stain 1 Positive Tissue	61.6195		% Stain 1 Positive Tissue	66.5251		% Stain 1 Positive Tissue	29.3707		% Stain 1 Positive Tissue	65.281		% Stain 1 Positive Tissue	67.3694
		% Stain 1 Positive Tissue (weak)	4.62618		% Stain 1 Positive Tissue (weak)	7.00723		% Stain 1 Positive Tissue (weak)	19.7492		% Stain 1 Positive Tissue (weak)	19.7695		% Stain 1 Positive Tissue (weak)	20.7902		% Stain 1 Positive Tissue (weak)	14.4104		% Stain 1 Positive Tissue (weak)	24.9734		% Stain 1 Positive Tissue (weak)	26.6376
		% Stain 1 Positive Tissue (moderate)	3.15064		% Stain 1 Positive Tissue (moderate)	4.83839		% Stain 1 Positive Tissue (moderate)	11.1527		% Stain 1 Positive Tissue (moderate)	25.354		% Stain 1 Positive Tissue (moderate)	25.5572		% Stain 1 Positive Tissue (moderate)	7.6715		% Stain 1 Positive Tissue (moderate)	26.0051		% Stain 1 Positive Tissue (moderate)	26.8915
		% Stain 1 Positive Tissue (strong)	5.23559		% Stain 1 Positive Tissue (strong)	8.64607		% Stain 1 Positive Tissue (strong)	13.0035		% Stain 1 Positive Tissue (strong)	16.496		% Stain 1 Positive Tissue (strong)	20.1778		% Stain 1 Positive Tissue (strong)	7.28881		% Stain 1 Positive Tissue (strong)	14.3025		% Stain 1 Positive Tissue (strong)	13.8403
		% Stain 2 Positive Tissue	67.5203		% Stain 2 Positive Tissue	29.2184		% Stain 2 Positive Tissue	9.97804		% Stain 2 Positive Tissue	20.6287		% Stain 2 Positive Tissue	7.977		% Stain 2 Positive Tissue	27.2561		% Stain 2 Positive Tissue	9.65322		% Stain 2 Positive Tissue	9.66925		22.7376
		% Stain 2 Positive Tissue (weak)	20.5932		% Stain 2 Positive Tissue (weak)	17.7518		% Stain 2 Positive Tissue (weak)	6.43639		% Stain 2 Positive Tissue (weak)	6.84234		% Stain 2 Positive Tissue (weak)	4.44099		% Stain 2 Positive Tissue (weak)	14.1613		% Stain 2 Positive Tissue (weak)	5.10094		% Stain 2 Positive Tissue (weak)	5.34631
		% Stain 2 Positive Tissue (moderate)	14.5801		% Stain 2 Positive Tissue (moderate)	6.41942		% Stain 2 Positive Tissue (moderate)	2.24474		% Stain 2 Positive Tissue (moderate)	5.02787		% Stain 2 Positive Tissue (moderate)	1.73127		% Stain 2 Positive Tissue (moderate)	6.66096		% Stain 2 Positive Tissue (moderate)	2.21425		% Stain 2 Positive Tissue (moderate)	2.25138
		% Stain 2 Positive Tissue (strong)	32.347		% Stain 2 Positive Tissue (strong)	5.04716		% Stain 2 Positive Tissue (strong)	1.29691		% Stain 2 Positive Tissue (strong)	8.75851		% Stain 2 Positive Tissue (strong)	1.80474		% Stain 2 Positive Tissue (strong)	6.43382		% Stain 2 Positive Tissue (strong)	2.33804		% Stain 2 Positive Tissue (strong)	2.07155
		Stain 1 Average Positive Optical Density	0.359977		Stain 1 Average Positive Optical Density	0.359912		Stain 1 Average Positive Optical Density	0.349539		Stain 1 Average Positive Optical Density	0.340403		Stain 1 Average Positive Optical Density	0.348463		Stain 1 Average Positive Optical Density	0.318969		Stain 1 Average Positive Optical Density	0.324944		Stain 1 Average Positive Optical Density	0.316711
		Stain 2 Average Positive Optical Density	0.418697		Stain 2 Average Positive Optical Density	0.264178		Stain 2 Average Positive Optical Density	0.249953		Stain 2 Average Positive Optical Density	0.363084		Stain 2 Average Positive Optical Density	0.289549		Stain 2 Average Positive Optical Density	0.290201		Stain 2 Average Positive Optical Density	0.293181		Stain 2 Average Positive Optical Density	0.279726
		% Negative Tissue	27.5958		% Negative Tissue	55.1072		% Negative Tissue	48.847		% Negative Tissue	21.7343		% Negative Tissue	27.3866		% Negative Tissue	47.9283		% Negative Tissue	26.8344		% Negative Tissue	24.8828
		BSNA87.2d
		Name	Value		Name	Value		Name	Value		Name	Value		Name	Value		Name	Value		Name	Value		Name	Value
		Tissue Area Analyzed (μm²)	698893		Tissue Area Analyzed (μm²)	598083		Tissue Area Analyzed (μm²)	558911		Tissue Area Analyzed (μm²)	721556		Tissue Area Analyzed (μm²)	899279		Tissue Area Analyzed (μm²)	535639		Tissue Area Analyzed (μm²)	780059		Tissue Area Analyzed (μm²)	737183
		Stain 1 Area (μm²)	527456		Stain 1 Area (μm²)	415789		Stain 1 Area (μm²)	260971		Stain 1 Area (μm²)	335431		Stain 1 Area (μm²)	677230		Stain 1 Area (μm²)	486810		Stain 1 Area (μm²)	616920		Stain 1 Area (μm²)	519131
		Stain 1 Weak Area (μm²)	143734		Stain 1 Weak Area (μm²)	167063		Stain 1 Weak Area (μm²)	75542.9		Stain 1 Weak Area (μm²)	134582		Stain 1 Weak Area (μm²)	309239		Stain 1 Weak Area (μm²)	117579		Stain 1 Weak Area (μm²)	321174		Stain 1 Weak Area (μm²)	199726
		Stain 1 Moderate Area (μm²)	181638		Stain 1 Moderate Area (μm²)	129193		Stain 1 Moderate Area (μm²)	43586.8		Stain 1 Moderate Area (μm²)	80387.8		Stain 1 Moderate Area (μm²)	233115		Stain 1 Moderate Area (μm²)	209248		Stain 1 Moderate Area (μm²)	169944		Stain 1 Moderate Area (μm²)	167106
		Stain 1 Strong Area (μm²)	202083		Stain 1 Strong Area (μm²)	119533		Stain 1 Strong Area (μm²)	141842		Stain 1 Strong Area (μm²)	120462		Stain 1 Strong Area (μm²)	134876		Stain 1 Strong Area (μm²)	159982		Stain 1 Strong Area (μm²)	125802		Stain 1 Strong Area (μm²)	152299
		Stain 2 Area (μm²)	16570.4		Stain 2 Area (μm²)	9015.5		Stain 2 Area (μm²)	70207.9		Stain 2 Area (μm²)	81745.7		Stain 2 Area (μm²)	23845.2		Stain 2 Area (μm²)	3243.41		Stain 2 Area (μm²)	17028.2		Stain 2 Area (μm²)	19200.1
		Stain 2 Weak Area (μm²)	10581.2		Stain 2 Weak Area (μm²)	6482.2		Stain 2 Weak Area (μm²)	36391.6		Stain 2 Weak Area (μm²)	36126.1		Stain 2 Weak Area (μm²)	12537.2		Stain 2 Weak Area (μm²)	2646.46		Stain 2 Weak Area (μm²)	11043.1		Stain 2 Weak Area (μm²)	11726.6
		Stain 2 Moderate Area (μm²)	3622.13		Stain 2 Moderate Area (μm²)	1700.22		Stain 2 Moderate Area (μm²)	18231.3		Stain 2 Moderate Area (μm²)	20445.9		Stain 2 Moderate Area (μm²)	6072.3		Stain 2 Moderate Area (μm²)	378.725		Stain 2 Moderate Area (μm²)	3069.63		Stain 2 Moderate Area (μm²)	3585.76
		Stain 2 Strong Area (μm²)	2367.03		Stain 2 Strong Area (μm²)	833.079		Stain 2 Strong Area (μm²)	15584.9		Stain 2 Strong Area (μm²)	25173.7		Stain 2 Strong Area (μm²)	5235.76		Stain 2 Strong Area (μm²)	218.229		Stain 2 Strong Area (μm²)	2915.49		Stain 2 Strong Area (μm²)	3887.7
		% Stain 1 Positive Tissue	75.4702		% Stain 1 Positive Tissue	69.5202		% Stain 1 Positive Tissue	46.6928		% Stain 1 Positive Tissue	46.4872		% Stain 1 Positive Tissue	75.3081		% Stain 1 Positive Tissue	90.884		% Stain 1 Positive Tissue	79.0863		% Stain 1 Positive Tissue	70.4209
		% Stain 1 Positive Tissue (weak)	20.566		% Stain 1 Positive Tissue (weak)	27.9331		% Stain 1 Positive Tissue (weak)	13.5161		% Stain 1 Positive Tissue (weak)	18.6516		% Stain 1 Positive Tissue (weak)	34.3875		% Stain 1 Positive Tissue (weak)	21.9512		% Stain 1 Positive Tissue (weak)	41.173		% Stain 1 Positive Tissue (weak)	27.0931
		% Stain 1 Positive Tissue (moderate)	25.9895		% Stain 1 Positive Tissue (moderate)	21.6011		% Stain 1 Positive Tissue (moderate)	7.79853		% Stain 1 Positive Tissue (moderate)	11.1409		% Stain 1 Positive Tissue (moderate)	25.9224		% Stain 1 Positive Tissue (moderate)	39.0652		% Stain 1 Positive Tissue (moderate)	21.7861		% Stain 1 Positive Tissue (moderate)	22.6682
		% Stain 1 Positive Tissue (strong)	28.9148		% Stain 1 Positive Tissue (strong)	19.986		% Stain 1 Positive Tissue (strong)	25.3782		% Stain 1 Positive Tissue (strong)	16.6947		% Stain 1 Positive Tissue (strong)	14.9982		% Stain 1 Positive Tissue (strong)	29.8676		% Stain 1 Positive Tissue (strong)	16.1272		% Stain 1 Positive Tissue (strong)	20.6596
		% Stain 2 Positive Tissue	2.37094		% Stain 2 Positive Tissue	1.5074		% Stain 2 Positive Tissue	12.5615		% Stain 2 Positive Tissue	11.3291		% Stain 2 Positive Tissue	2.65159		% Stain 2 Positive Tissue	0.605522		% Stain 2 Positive Tissue	2.18294		% Stain 2 Positive Tissue	2.60452		4.47669
		% Stain 2 Positive Tissue (weak)	1.51399		% Stain 2 Positive Tissue (weak)	1.08383		% Stain 2 Positive Tissue (weak)	6.51117		% Stain 2 Positive Tissue (weak)	5.00669		% Stain 2 Positive Tissue (weak)	1.39414		% Stain 2 Positive Tissue (weak)	0.494075		% Stain 2 Positive Tissue (weak)	1.41567		% Stain 2 Positive Tissue (weak)	1.59073
		% Stain 2 Positive Tissue (moderate)	0.518267		% Stain 2 Positive Tissue (moderate)	0.284278		% Stain 2 Positive Tissue (moderate)	3.26194		% Stain 2 Positive Tissue (moderate)	2.83359		% Stain 2 Positive Tissue (moderate)	0.675241		% Stain 2 Positive Tissue (moderate)	0.070705		% Stain 2 Positive Tissue (moderate)	0.393513		% Stain 2 Positive Tissue (moderate)	0.486414
		% Stain 2 Positive Tissue (strong)	0.338683		% Stain 2 Positive Tissue (strong)	0.139292		% Stain 2 Positive Tissue (strong)	2.78843		% Stain 2 Positive Tissue (strong)	3.4888		% Stain 2 Positive Tissue (strong)	0.582217		% Stain 2 Positive Tissue (strong)	0.040742		% Stain 2 Positive Tissue (strong)	0.373752		% Stain 2 Positive Tissue (strong)	0.527373
		Stain 1 Average Positive Optical Density	0.379662		Stain 1 Average Positive Optical Density	0.335422		Stain 1 Average Positive Optical Density	0.479362		Stain 1 Average Positive Optical Density	0.378361		Stain 1 Average Positive Optical Density	0.315126		Stain 1 Average Positive Optical Density	0.367074		Stain 1 Average Positive Optical Density	0.298333		Stain 1 Average Positive Optical Density	0.34608
		Stain 2 Average Positive Optical Density	0.252628		Stain 2 Average Positive Optical Density	0.230445		Stain 2 Average Positive Optical Density	0.280705		Stain 2 Average Positive Optical Density	0.317639		Stain 2 Average Positive Optical Density	0.293328		Stain 2 Average Positive Optical Density	0.214654		Stain 2 Average Positive Optical Density	0.260763		Stain 2 Average Positive Optical Density	0.291228
		% Negative Tissue	22.8945		% Negative Tissue	29.345		% Negative Tissue	45.7583		% Negative Tissue	44.4978		% Negative Tissue	22.4368		% Negative Tissue	8.6919		% Negative Tissue	19.1303		% Negative Tissue	27.6921
		BSNA84.3c	WT
		Name	Value		Name	Value		Name	Value		Name	Value		Name	Value		Name	Value		Name	Value		Name	Value
		Tissue Area Analyzed (μm²)	1170429		Tissue Area Analyzed (μm²)	672291		Tissue Area Analyzed (μm²)	837089		Tissue Area Analyzed (μm²)	1.0297e+06		Tissue Area Analyzed (μm²)	1.04715e+06		Tissue Area Analyzed (μm²)	1.13747e+06		Tissue Area Analyzed (μm²)	830116		Tissue Area Analyzed (μm²)	766173
		Stain 1 Area (μm²)	474792		Stain 1 Area (μm²)	99788.8		Stain 1 Area (μm²)	133540		Stain 1 Area (μm²)	206750		Stain 1 Area (μm²)	231750		Stain 1 Area (μm²)	378188		Stain 1 Area (μm²)	278138		Stain 1 Area (μm²)	289358
		Stain 1 Weak Area (μm²)	283728		Stain 1 Weak Area (μm²)	44687.2		Stain 1 Weak Area (μm²)	52714.9		Stain 1 Weak Area (μm²)	84815.9		Stain 1 Weak Area (μm²)	155361		Stain 1 Weak Area (μm²)	196775		Stain 1 Weak Area (μm²)	161093		Stain 1 Weak Area (μm²)	148815
		Stain 1 Moderate Area (μm²)	70132.8		Stain 1 Moderate Area (μm²)	21427.4		Stain 1 Moderate Area (μm²)	29493.8		Stain 1 Moderate Area (μm²)	47806.5		Stain 1 Moderate Area (μm²)	48895.3		Stain 1 Moderate Area (μm²)	58636.5		Stain 1 Moderate Area (μm²)	39901.2		Stain 1 Moderate Area (μm²)	59516.4
		Stain 1 Strong Area (μm²)	120930		Stain 1 Strong Area (μm²)	33674.2		Stain 1 Strong Area (μm²)	51331.7		Stain 1 Strong Area (μm²)	74127.9		Stain 1 Strong Area (μm²)	27493.3		Stain 1 Strong Area (μm²)	122776		Stain 1 Strong Area (μm²)	77143.8		Stain 1 Strong Area (μm²)	81026.9
		Stain 2 Area (μm²)	84285.3		Stain 2 Area (μm²)	295346		Stain 2 Area (μm²)	261260		Stain 2 Area (μm²)	196003		Stain 2 Area (μm²)	164654		Stain 2 Area (μm²)	175007		Stain 2 Area (μm²)	52590.8		Stain 2 Area (μm²)	209842
		Stain 2 Weak Area (μm²)	49120.5		Stain 2 Weak Area (μm²)	147353		Stain 2 Weak Area (μm²)	123059		Stain 2 Weak Area (μm²)	103933		Stain 2 Weak Area (μm²)	117752		Stain 2 Weak Area (μm²)	83635.8		Stain 2 Weak Area (μm²)	21133.5		Stain 2 Weak Area (μm²)	109335
		Stain 2 Moderate Area (μm²)	17669		Stain 2 Moderate Area (μm²)	66233		Stain 2 Moderate Area (μm²)	66393.5		Stain 2 Moderate Area (μm²)	46620.1		Stain 2 Moderate Area (μm²)	29851.1		Stain 2 Moderate Area (μm²)	38649.6		Stain 2 Moderate Area (μm²)	14146.2		Stain 2 Moderate Area (μm²)	49825.4
		Stain 2 Strong Area (μm²)	17495.8		Stain 2 Strong Area (μm²)	81759.5		Stain 2 Strong Area (μm²)	71807.6		Stain 2 Strong Area (μm²)	45450.4		Stain 2 Strong Area (μm²)	17050.1		Stain 2 Strong Area (μm²)	52721.9		Stain 2 Strong Area (μm²)	17311.1		Stain 2 Strong Area (μm²)	50682.2
		% Stain 1 Positive Tissue	40.5656		% Stain 1 Positive Tissue	14.8431		% Stain 1 Positive Tissue	15.9529		% Stain 1 Positive Tissue	20.0786		% Stain 1 Positive Tissue	22.1315		% Stain 1 Positive Tissue	33.2483		% Stain 1 Positive Tissue	33.5059		% Stain 1 Positive Tissue	37.7668
		% Stain 1 Positive Tissue (weak)	24.2414		% Stain 1 Positive Tissue (weak)	6.64701		% Stain 1 Positive Tissue (weak)	6.29741		% Stain 1 Positive Tissue (weak)	8.23693		% Stain 1 Positive Tissue (weak)	14.8366		% Stain 1 Positive Tissue (weak)	17.2994		% Stain 1 Positive Tissue (weak)	19.406		% Stain 1 Positive Tissue (weak)	19.4232
		% Stain 1 Positive Tissue (moderate)	5.99206		% Stain 1 Positive Tissue (moderate)	3.18722		% Stain 1 Positive Tissue (moderate)	3.52337		% Stain 1 Positive Tissue (moderate)	4.64275		% Stain 1 Positive Tissue (moderate)	4.66938		% Stain 1 Positive Tissue (moderate)	5.15501		% Stain 1 Positive Tissue (moderate)	4.8067		% Stain 1 Positive Tissue (moderate)	7.76801
		% Stain 1 Positive Tissue (strong)	10.3321		% Stain 1 Positive Tissue (strong)	5.00887		% Stain 1 Positive Tissue (strong)	6.13216		% Stain 1 Positive Tissue (strong)	7.19896		% Stain 1 Positive Tissue (strong)	2.62555		% Stain 1 Positive Tissue (strong)	10.7938		% Stain 1 Positive Tissue (strong)	9.29313		% Stain 1 Positive Tissue (strong)	10.5755
		% Stain 2 Positive Tissue	7.20123		% Stain 2 Positive Tissue	43.9313		% Stain 2 Positive Tissue	31.2105		% Stain 2 Positive Tissue	19.0349		% Stain 2 Positive Tissue	15.724		% Stain 2 Positive Tissue	15.3857		% Stain 2 Positive Tissue	6.33535		% Stain 2 Positive Tissue	27.3884
		% Stain 2 Positive Tissue (weak)	4.19679		% Stain 2 Positive Tissue (weak)	21.9181		% Stain 2 Positive Tissue (weak)	14.7008		% Stain 2 Positive Tissue (weak)	10.0935		% Stain 2 Positive Tissue (weak)	11.245		% Stain 2 Positive Tissue (weak)	7.35282		% Stain 2 Positive Tissue (weak)	2.54585		% Stain 2 Positive Tissue (weak)	14.2703		10.7904
		% Stain 2 Positive Tissue (moderate)	1.50962		% Stain 2 Positive Tissue (moderate)	9.85183		% Stain 2 Positive Tissue (moderate)	7.93147		% Stain 2 Positive Tissue (moderate)	4.52753		% Stain 2 Positive Tissue (moderate)	2.85071		% Stain 2 Positive Tissue (moderate)	3.39786		% Stain 2 Positive Tissue (moderate)	1.70412		% Stain 2 Positive Tissue (moderate)	6.50316
		% Stain 2 Positive Tissue (strong)	1.49482		% Stain 2 Positive Tissue (strong)	12.1613		% Stain 2 Positive Tissue (strong)	8.57825		% Stain 2 Positive Tissue (strong)	4.41394		% Stain 2 Positive Tissue (strong)	1.62824		% Stain 2 Positive Tissue (strong)	4.63502		% Stain 2 Positive Tissue (strong)	2.08538		% Stain 2 Positive Tissue (strong)	6.61498
		Stain 1 Average Positive Optical Density	0.298707		Stain 1 Average Positive Optical Density	0.323988		Stain 1 Average Positive Optical Density	0.348088		Stain 1 Average Positive Optical Density	0.335776		Stain 1 Average Positive Optical Density	0.240371		Stain 1 Average Positive Optical Density	0.329187		Stain 1 Average Positive Optical Density	0.30999		Stain 1 Average Positive Optical Density	0.332875
		Stain 2 Average Positive Optical Density	0.277984		Stain 2 Average Positive Optical Density	0.310669		Stain 2 Average Positive Optical Density	0.311324		Stain 2 Average Positive Optical Density	0.293959		Stain 2 Average Positive Optical Density	0.233323		Stain 2 Average Positive Optical Density	0.315263		Stain 2 Average Positive Optical Density	0.324005		Stain 2 Average Positive Optical Density	0.291649
		% Negative Tissue	53.3879		% Negative Tissue	45.5001		% Negative Tissue	57.2008		% Negative Tissue	63.8122		% Negative Tissue	63.1097		% Negative Tissue	55.1451		% Negative Tissue	61.225		% Negative Tissue	38.7602
