# Supplementary material for: CYRI-B-mediated macropinocytosis drives metastasis via lysophosphatidic acid receptor uptake
Source: eLife journal article supplement (doi:10.7554/elife.83712), 2024-05-07
Supplement: fig3-data5 [file Figure 3- source data 5 Excel 3I.xlsx]

## Sheet: Sheet2
	BRDU
	HOM	70.2c
	Layer 1
	Name	Value		Name	Value		Name	Value		Name	Value		Name	Value		Name	Value		Name	Value		Name	Value
	Total Cells	2987		Total Cells	3572		Total Cells	4282		Total Cells	3134		Total Cells	3616		Total Cells	3581		Total Cells	3703		Total Cells	4077
	Stain 1 Positive Cells	175		Stain 1 Positive Cells	256		Stain 1 Positive Cells	218		Stain 1 Positive Cells	285		Stain 1 Positive Cells	215		Stain 1 Positive Cells	275		Stain 1 Positive Cells	186		Stain 1 Positive Cells	297
	Stain 1 0+ Cells	2812		Stain 1 0+ Cells	3316		Stain 1 0+ Cells	4064		Stain 1 0+ Cells	2849		Stain 1 0+ Cells	3401		Stain 1 0+ Cells	3306		Stain 1 0+ Cells	3517		Stain 1 0+ Cells	3780
	Stain 1 1+ Cells	58		Stain 1 1+ Cells	90		Stain 1 1+ Cells	80		Stain 1 1+ Cells	62		Stain 1 1+ Cells	93		Stain 1 1+ Cells	65		Stain 1 1+ Cells	65		Stain 1 1+ Cells	111
	Stain 1 2+ Cells	78		Stain 1 2+ Cells	123		Stain 1 2+ Cells	114		Stain 1 2+ Cells	146		Stain 1 2+ Cells	103		Stain 1 2+ Cells	131		Stain 1 2+ Cells	87		Stain 1 2+ Cells	143
	Stain 1 3+ Cells	39		Stain 1 3+ Cells	43		Stain 1 3+ Cells	24		Stain 1 3+ Cells	77		Stain 1 3+ Cells	19		Stain 1 3+ Cells	79		Stain 1 3+ Cells	34		Stain 1 3+ Cells	43
	Stain 2 Positive Cells	0		Stain 2 Positive Cells	0		Stain 2 Positive Cells	0		Stain 2 Positive Cells	0		Stain 2 Positive Cells	0		Stain 2 Positive Cells	0		Stain 2 Positive Cells	0		Stain 2 Positive Cells	0
	Stain 2 0+ Cells	2987		Stain 2 0+ Cells	3572		Stain 2 0+ Cells	4282		Stain 2 0+ Cells	3134		Stain 2 0+ Cells	3616		Stain 2 0+ Cells	3581		Stain 2 0+ Cells	3703		Stain 2 0+ Cells	4077
	Stain 2 1+ Cells	0		Stain 2 1+ Cells	0		Stain 2 1+ Cells	0		Stain 2 1+ Cells	0		Stain 2 1+ Cells	0		Stain 2 1+ Cells	0		Stain 2 1+ Cells	0		Stain 2 1+ Cells	0
	Stain 2 2+ Cells	0		Stain 2 2+ Cells	0		Stain 2 2+ Cells	0		Stain 2 2+ Cells	0		Stain 2 2+ Cells	0		Stain 2 2+ Cells	0		Stain 2 2+ Cells	0		Stain 2 2+ Cells	0
	Stain 2 3+ Cells	0		Stain 2 3+ Cells	0		Stain 2 3+ Cells	0		Stain 2 3+ Cells	0		Stain 2 3+ Cells	0		Stain 2 3+ Cells	0		Stain 2 3+ Cells	0		Stain 2 3+ Cells	0
	Dual Positive Cells	0		Dual Positive Cells	0		Dual Positive Cells	0		Dual Positive Cells	0		Dual Positive Cells	0		Dual Positive Cells	0		Dual Positive Cells	0		Dual Positive Cells	0
	Dual Negative Cells	2812		Dual Negative Cells	3316		Dual Negative Cells	4064		Dual Negative Cells	2849		Dual Negative Cells	3401		Dual Negative Cells	3306		Dual Negative Cells	3517		Dual Negative Cells	3780
	% Stain 1 Positive Cells	5.85872		% Stain 1 Positive Cells	7.16685		% Stain 1 Positive Cells	5.09108		% Stain 1 Positive Cells	9.09381		% Stain 1 Positive Cells	5.9458		% Stain 1 Positive Cells	7.67942		% Stain 1 Positive Cells	5.02295		% Stain 1 Positive Cells	7.28477		6.64292
	% Stain 1 0+ Cells	94.1413		% Stain 1 0+ Cells	92.8331		% Stain 1 0+ Cells	94.9089		% Stain 1 0+ Cells	90.9062		% Stain 1 0+ Cells	94.0542		% Stain 1 0+ Cells	92.3206		% Stain 1 0+ Cells	94.977		% Stain 1 0+ Cells	92.7152
	% Stain 1 1+ Cells	1.94175		% Stain 1 1+ Cells	2.5196		% Stain 1 1+ Cells	1.86829		% Stain 1 1+ Cells	1.9783		% Stain 1 1+ Cells	2.5719		% Stain 1 1+ Cells	1.81514		% Stain 1 1+ Cells	1.75533		% Stain 1 1+ Cells	2.72259
	% Stain 1 2+ Cells	2.61132		% Stain 1 2+ Cells	3.44345		% Stain 1 2+ Cells	2.66231		% Stain 1 2+ Cells	4.65858		% Stain 1 2+ Cells	2.84845		% Stain 1 2+ Cells	3.6582		% Stain 1 2+ Cells	2.34945		% Stain 1 2+ Cells	3.50748
	% Stain 1 3+ Cells	1.30566		% Stain 1 3+ Cells	1.20381		% Stain 1 3+ Cells	0.560486		% Stain 1 3+ Cells	2.45692		% Stain 1 3+ Cells	0.525442		% Stain 1 3+ Cells	2.20609		% Stain 1 3+ Cells	0.918174		% Stain 1 3+ Cells	1.0547
	Stain 1 H-Score	11.0814		Stain 1 H-Score	13.0179		Stain 1 H-Score	8.87436		Stain 1 H-Score	18.6662		Stain 1 H-Score	9.84513		Stain 1 H-Score	15.7498		Stain 1 H-Score	9.20875		Stain 1 H-Score	12.9016
	% Stain 2 Positive Cells	0		% Stain 2 Positive Cells	0		% Stain 2 Positive Cells	0		% Stain 2 Positive Cells	0		% Stain 2 Positive Cells	0		% Stain 2 Positive Cells	0		% Stain 2 Positive Cells	0		% Stain 2 Positive Cells	0
	% Stain 2 0+ Cells	100		% Stain 2 0+ Cells	100		% Stain 2 0+ Cells	100		% Stain 2 0+ Cells	100		% Stain 2 0+ Cells	100		% Stain 2 0+ Cells	100		% Stain 2 0+ Cells	100		% Stain 2 0+ Cells	100
	% Stain 2 1+ Cells	0		% Stain 2 1+ Cells	0		% Stain 2 1+ Cells	0		% Stain 2 1+ Cells	0		% Stain 2 1+ Cells	0		% Stain 2 1+ Cells	0		% Stain 2 1+ Cells	0		% Stain 2 1+ Cells	0
	% Stain 2 2+ Cells	0		% Stain 2 2+ Cells	0		% Stain 2 2+ Cells	0		% Stain 2 2+ Cells	0		% Stain 2 2+ Cells	0		% Stain 2 2+ Cells	0		% Stain 2 2+ Cells	0		% Stain 2 2+ Cells	0
	% Stain 2 3+ Cells	0		% Stain 2 3+ Cells	0		% Stain 2 3+ Cells	0		% Stain 2 3+ Cells	0		% Stain 2 3+ Cells	0		% Stain 2 3+ Cells	0		% Stain 2 3+ Cells	0		% Stain 2 3+ Cells	0
	Stain 2 H-Score	0		Stain 2 H-Score	0		Stain 2 H-Score	0		Stain 2 H-Score	0		Stain 2 H-Score	0		Stain 2 H-Score	0		Stain 2 H-Score	0		Stain 2 H-Score	0
	% Dual Positive Cells	0		% Dual Positive Cells	0		% Dual Positive Cells	0		% Dual Positive Cells	0		% Dual Positive Cells	0		% Dual Positive Cells	0		% Dual Positive Cells	0		% Dual Positive Cells	0
	% Dual Negative Cells	94.1413		% Dual Negative Cells	92.8331		% Dual Negative Cells	94.9089		% Dual Negative Cells	90.9062		% Dual Negative Cells	94.0542		% Dual Negative Cells	92.3206		% Dual Negative Cells	94.977		% Dual Negative Cells	92.7152
	Avg Stain 1 Nuclear OD	0.0646684		Avg Stain 1 Nuclear OD	0.0614232		Avg Stain 1 Nuclear OD	0.0539958		Avg Stain 1 Nuclear OD	0.0751826		Avg Stain 1 Nuclear OD	0.0555619		Avg Stain 1 Nuclear OD	0.071108		Avg Stain 1 Nuclear OD	0.0607643		Avg Stain 1 Nuclear OD	0.0653979
	Avg Stain 2 Nuclear OD	0.0336761		Avg Stain 2 Nuclear OD	0.0337537		Avg Stain 2 Nuclear OD	0.0336624		Avg Stain 2 Nuclear OD	0.0348349		Avg Stain 2 Nuclear OD	0.0330523		Avg Stain 2 Nuclear OD	0.0338529		Avg Stain 2 Nuclear OD	0.0336279		Avg Stain 2 Nuclear OD	0.0332013
	Avg Stain 1 Cytoplasmic OD	0.0424016		Avg Stain 1 Cytoplasmic OD	0.0393743		Avg Stain 1 Cytoplasmic OD	0.0380082		Avg Stain 1 Cytoplasmic OD	0.0395709		Avg Stain 1 Cytoplasmic OD	0.0387019		Avg Stain 1 Cytoplasmic OD	0.0440146		Avg Stain 1 Cytoplasmic OD	0.0409214		Avg Stain 1 Cytoplasmic OD	0.0424473
	Avg Stain 2 Cytoplasmic OD	0.0311181		Avg Stain 2 Cytoplasmic OD	0.0312077		Avg Stain 2 Cytoplasmic OD	0.0313823		Avg Stain 2 Cytoplasmic OD	0.0311083		Avg Stain 2 Cytoplasmic OD	0.0311402		Avg Stain 2 Cytoplasmic OD	0.0312106		Avg Stain 2 Cytoplasmic OD	0.0312263		Avg Stain 2 Cytoplasmic OD	0.0311202
	Avg Cell Area (µm²)	105.394		Avg Cell Area (µm²)	106.603		Avg Cell Area (µm²)	91.0026		Avg Cell Area (µm²)	123.573		Avg Cell Area (µm²)	99.0292		Avg Cell Area (µm²)	101.148		Avg Cell Area (µm²)	103.172		Avg Cell Area (µm²)	102.533
	Avg Cytoplasm Area (µm²)	80.6478		Avg Cytoplasm Area (µm²)	82.5417		Avg Cytoplasm Area (µm²)	67.1797		Avg Cytoplasm Area (µm²)	99.2943		Avg Cytoplasm Area (µm²)	76.268		Avg Cytoplasm Area (µm²)	76.0444		Avg Cytoplasm Area (µm²)	78.3628		Avg Cytoplasm Area (µm²)	76.4932
	Avg Nucleus Area (µm²)	24.7461		Avg Nucleus Area (µm²)	24.0615		Avg Nucleus Area (µm²)	23.8229		Avg Nucleus Area (µm²)	24.2791		Avg Nucleus Area (µm²)	22.7612		Avg Nucleus Area (µm²)	25.1032		Avg Nucleus Area (µm²)	24.809		Avg Nucleus Area (µm²)	26.0398
	Avg Nucleus Perimeter (µm)	20.3917		Avg Nucleus Perimeter (µm)	20.3683		Avg Nucleus Perimeter (µm)	20.3838		Avg Nucleus Perimeter (µm)	20.2283		Avg Nucleus Perimeter (µm)	19.7637		Avg Nucleus Perimeter (µm)	20.4596		Avg Nucleus Perimeter (µm)	20.4547		Avg Nucleus Perimeter (µm)	20.9264
	Avg Nucleus Roundness	0.696631		Avg Nucleus Roundness	0.697038		Avg Nucleus Roundness	0.683489		Avg Nucleus Roundness	0.706966		Avg Nucleus Roundness	0.68976		Avg Nucleus Roundness	0.697482		Avg Nucleus Roundness	0.689774		Avg Nucleus Roundness	0.695188
	Tissue Area (µm²)	403336		Tissue Area (µm²)	477079		Tissue Area (µm²)	474173		Tissue Area (µm²)	510290		Tissue Area (µm²)	444529		Tissue Area (µm²)	440976		Tissue Area (µm²)	485451		Tissue Area (µm²)	511614
	wt	53.2a
																x
	Name	Value		Name	Value		Name	Value		Name	Value		Name	Value		Name	Value		Name	Value		Name	Value
	Total Cells	3102		Total Cells	3249		Total Cells	2528		Total Cells	2910		Total Cells	2871		Total Cells	3285		Total Cells	3109		Total Cells	4348
	Stain 1 Positive Cells	114		Stain 1 Positive Cells	98		Stain 1 Positive Cells	155		Stain 1 Positive Cells	100		Stain 1 Positive Cells	213		Stain 1 Positive Cells	292		Stain 1 Positive Cells	79		Stain 1 Positive Cells	231
	Stain 1 0+ Cells	2988		Stain 1 0+ Cells	3151		Stain 1 0+ Cells	2373		Stain 1 0+ Cells	2810		Stain 1 0+ Cells	2658		Stain 1 0+ Cells	2993		Stain 1 0+ Cells	3030		Stain 1 0+ Cells	4117
	Stain 1 1+ Cells	59		Stain 1 1+ Cells	23		Stain 1 1+ Cells	82		Stain 1 1+ Cells	47		Stain 1 1+ Cells	100		Stain 1 1+ Cells	110		Stain 1 1+ Cells	39		Stain 1 1+ Cells	71
	Stain 1 2+ Cells	32		Stain 1 2+ Cells	45		Stain 1 2+ Cells	54		Stain 1 2+ Cells	27		Stain 1 2+ Cells	48		Stain 1 2+ Cells	81		Stain 1 2+ Cells	22		Stain 1 2+ Cells	87
	Stain 1 3+ Cells	23		Stain 1 3+ Cells	30		Stain 1 3+ Cells	19		Stain 1 3+ Cells	26		Stain 1 3+ Cells	65		Stain 1 3+ Cells	101		Stain 1 3+ Cells	18		Stain 1 3+ Cells	73
	Stain 2 Positive Cells	0		Stain 2 Positive Cells	0		Stain 2 Positive Cells	0		Stain 2 Positive Cells	0		Stain 2 Positive Cells	0		Stain 2 Positive Cells	0		Stain 2 Positive Cells	0		Stain 2 Positive Cells	0
	Stain 2 0+ Cells	3102		Stain 2 0+ Cells	3249		Stain 2 0+ Cells	2528		Stain 2 0+ Cells	2910		Stain 2 0+ Cells	2871		Stain 2 0+ Cells	3285		Stain 2 0+ Cells	3109		Stain 2 0+ Cells	4348
	Stain 2 1+ Cells	0		Stain 2 1+ Cells	0		Stain 2 1+ Cells	0		Stain 2 1+ Cells	0		Stain 2 1+ Cells	0		Stain 2 1+ Cells	0		Stain 2 1+ Cells	0		Stain 2 1+ Cells	0
	Stain 2 2+ Cells	0		Stain 2 2+ Cells	0		Stain 2 2+ Cells	0		Stain 2 2+ Cells	0		Stain 2 2+ Cells	0		Stain 2 2+ Cells	0		Stain 2 2+ Cells	0		Stain 2 2+ Cells	0
	Stain 2 3+ Cells	0		Stain 2 3+ Cells	0		Stain 2 3+ Cells	0		Stain 2 3+ Cells	0		Stain 2 3+ Cells	0		Stain 2 3+ Cells	0		Stain 2 3+ Cells	0		Stain 2 3+ Cells	0
	Dual Positive Cells	0		Dual Positive Cells	0		Dual Positive Cells	0		Dual Positive Cells	0		Dual Positive Cells	0		Dual Positive Cells	0		Dual Positive Cells	0		Dual Positive Cells	0
	Dual Negative Cells	2988		Dual Negative Cells	3151		Dual Negative Cells	2373		Dual Negative Cells	2810		Dual Negative Cells	2658		Dual Negative Cells	2993		Dual Negative Cells	3030		Dual Negative Cells	4117
	% Stain 1 Positive Cells	3.67505		% Stain 1 Positive Cells	3.01631		% Stain 1 Positive Cells	6.13133		% Stain 1 Positive Cells	3.43643		% Stain 1 Positive Cells	7.41902		% Stain 1 Positive Cells	8.88889		% Stain 1 Positive Cells	2.54101		% Stain 1 Positive Cells	5.31279		5.0526
	% Stain 1 0+ Cells	96.325		% Stain 1 0+ Cells	96.9837		% Stain 1 0+ Cells	93.8687		% Stain 1 0+ Cells	96.5636		% Stain 1 0+ Cells	92.581		% Stain 1 0+ Cells	91.1111		% Stain 1 0+ Cells	97.459		% Stain 1 0+ Cells	94.6872
	% Stain 1 1+ Cells	1.902		% Stain 1 1+ Cells	0.70791		% Stain 1 1+ Cells	3.24367		% Stain 1 1+ Cells	1.61512		% Stain 1 1+ Cells	3.48311		% Stain 1 1+ Cells	3.34855		% Stain 1 1+ Cells	1.25442		% Stain 1 1+ Cells	1.63293
	% Stain 1 2+ Cells	1.03159		% Stain 1 2+ Cells	1.38504		% Stain 1 2+ Cells	2.13608		% Stain 1 2+ Cells	0.927835		% Stain 1 2+ Cells	1.67189		% Stain 1 2+ Cells	2.46575		% Stain 1 2+ Cells	0.707623		% Stain 1 2+ Cells	2.00092
	% Stain 1 3+ Cells	0.741457		% Stain 1 3+ Cells	0.923361		% Stain 1 3+ Cells	0.751582		% Stain 1 3+ Cells	0.893471		% Stain 1 3+ Cells	2.26402		% Stain 1 3+ Cells	3.07458		% Stain 1 3+ Cells	0.578964		% Stain 1 3+ Cells	1.67893
	Stain 1 H-Score	6.18956		Stain 1 H-Score	6.24808		Stain 1 H-Score	9.77057		Stain 1 H-Score	6.1512		Stain 1 H-Score	13.6189		Stain 1 H-Score	17.5038		Stain 1 H-Score	4.40656		Stain 1 H-Score	10.6716
	% Stain 2 Positive Cells	0		% Stain 2 Positive Cells	0		% Stain 2 Positive Cells	0		% Stain 2 Positive Cells	0		% Stain 2 Positive Cells	0		% Stain 2 Positive Cells	0		% Stain 2 Positive Cells	0		% Stain 2 Positive Cells	0
	% Stain 2 0+ Cells	100		% Stain 2 0+ Cells	100		% Stain 2 0+ Cells	100		% Stain 2 0+ Cells	100		% Stain 2 0+ Cells	100		% Stain 2 0+ Cells	100		% Stain 2 0+ Cells	100		% Stain 2 0+ Cells	100
	% Stain 2 1+ Cells	0		% Stain 2 1+ Cells	0		% Stain 2 1+ Cells	0		% Stain 2 1+ Cells	0		% Stain 2 1+ Cells	0		% Stain 2 1+ Cells	0		% Stain 2 1+ Cells	0		% Stain 2 1+ Cells	0
	% Stain 2 2+ Cells	0		% Stain 2 2+ Cells	0		% Stain 2 2+ Cells	0		% Stain 2 2+ Cells	0		% Stain 2 2+ Cells	0		% Stain 2 2+ Cells	0		% Stain 2 2+ Cells	0		% Stain 2 2+ Cells	0
	% Stain 2 3+ Cells	0		% Stain 2 3+ Cells	0		% Stain 2 3+ Cells	0		% Stain 2 3+ Cells	0		% Stain 2 3+ Cells	0		% Stain 2 3+ Cells	0		% Stain 2 3+ Cells	0		% Stain 2 3+ Cells	0
	Stain 2 H-Score	0		Stain 2 H-Score	0		Stain 2 H-Score	0		Stain 2 H-Score	0		Stain 2 H-Score	0		Stain 2 H-Score	0		Stain 2 H-Score	0		Stain 2 H-Score	0
	% Dual Positive Cells	0		% Dual Positive Cells	0		% Dual Positive Cells	0		% Dual Positive Cells	0		% Dual Positive Cells	0		% Dual Positive Cells	0		% Dual Positive Cells	0		% Dual Positive Cells	0
	% Dual Negative Cells	96.325		% Dual Negative Cells	96.9837		% Dual Negative Cells	93.8687		% Dual Negative Cells	96.5636		% Dual Negative Cells	92.581		% Dual Negative Cells	91.1111		% Dual Negative Cells	97.459		% Dual Negative Cells	94.6872
	Avg Stain 1 Nuclear OD	0.0587512		Avg Stain 1 Nuclear OD	0.053139		Avg Stain 1 Nuclear OD	0.0666573		Avg Stain 1 Nuclear OD	0.0583711		Avg Stain 1 Nuclear OD	0.076186		Avg Stain 1 Nuclear OD	0.0861912		Avg Stain 1 Nuclear OD	0.0509845		Avg Stain 1 Nuclear OD	0.0671662
	Avg Stain 2 Nuclear OD	0.0334224		Avg Stain 2 Nuclear OD	0.0339499		Avg Stain 2 Nuclear OD	0.0337901		Avg Stain 2 Nuclear OD	0.0334124		Avg Stain 2 Nuclear OD	0.0348117		Avg Stain 2 Nuclear OD	0.0351115		Avg Stain 2 Nuclear OD	0.0331355		Avg Stain 2 Nuclear OD	0.0341527
	Avg Stain 1 Cytoplasmic OD	0.0435266		Avg Stain 1 Cytoplasmic OD	0.041784		Avg Stain 1 Cytoplasmic OD	0.0459344		Avg Stain 1 Cytoplasmic OD	0.0438957		Avg Stain 1 Cytoplasmic OD	0.0457996		Avg Stain 1 Cytoplasmic OD	0.0492624		Avg Stain 1 Cytoplasmic OD	0.0412801		Avg Stain 1 Cytoplasmic OD	0.0413677
	Avg Stain 2 Cytoplasmic OD	0.0310605		Avg Stain 2 Cytoplasmic OD	0.031633		Avg Stain 2 Cytoplasmic OD	0.0311881		Avg Stain 2 Cytoplasmic OD	0.0312353		Avg Stain 2 Cytoplasmic OD	0.0313791		Avg Stain 2 Cytoplasmic OD	0.0314467		Avg Stain 2 Cytoplasmic OD	0.0313398		Avg Stain 2 Cytoplasmic OD	0.0312598
	Avg Cell Area (µm²)	110.873		Avg Cell Area (µm²)	105.237		Avg Cell Area (µm²)	104.157		Avg Cell Area (µm²)	115.884		Avg Cell Area (µm²)	112.315		Avg Cell Area (µm²)	121.245		Avg Cell Area (µm²)	113.841		Avg Cell Area (µm²)	101.917
	Avg Cytoplasm Area (µm²)	87.6965		Avg Cytoplasm Area (µm²)	81.9822		Avg Cytoplasm Area (µm²)	81.8019		Avg Cytoplasm Area (µm²)	94.2242		Avg Cytoplasm Area (µm²)	90.4501		Avg Cytoplasm Area (µm²)	98.6935		Avg Cytoplasm Area (µm²)	91.6208		Avg Cytoplasm Area (µm²)	79.6516
	Avg Nucleus Area (µm²)	23.1763		Avg Nucleus Area (µm²)	23.2544		Avg Nucleus Area (µm²)	22.3547		Avg Nucleus Area (µm²)	21.6594		Avg Nucleus Area (µm²)	21.8645		Avg Nucleus Area (µm²)	22.5511		Avg Nucleus Area (µm²)	22.2203		Avg Nucleus Area (µm²)	22.2657
	Avg Nucleus Perimeter (µm)	19.7998		Avg Nucleus Perimeter (µm)	19.7518		Avg Nucleus Perimeter (µm)	19.3822		Avg Nucleus Perimeter (µm)	19.0602		Avg Nucleus Perimeter (µm)	19.0158		Avg Nucleus Perimeter (µm)	19.166		Avg Nucleus Perimeter (µm)	19.4585		Avg Nucleus Perimeter (µm)	19.3606
	Avg Nucleus Roundness	0.700096		Avg Nucleus Roundness	0.703156		Avg Nucleus Roundness	0.693459		Avg Nucleus Roundness	0.706747		Avg Nucleus Roundness	0.704679		Avg Nucleus Roundness	0.720783		Avg Nucleus Roundness	0.708321		Avg Nucleus Roundness	0.691559
	Tissue Area (µm²)	445368		Tissue Area (µm²)	420065		Tissue Area (µm²)	334090		Tissue Area (µm²)	442518		Tissue Area (µm²)	424672		Tissue Area (µm²)	515392		Tissue Area (µm²)	481680		Tissue Area (µm²)	557191
	wt	47.1a
	Name	Value		Name	Value		Name	Value		Name	Value		Name	Value		Name	Value		Name	Value		Name	Value
	Total Cells	3349		Total Cells	3849		Total Cells	3588		Total Cells	3507		Total Cells	2989		Total Cells	4073		Total Cells	6449		Total Cells	3760
	Stain 1 Positive Cells	145		Stain 1 Positive Cells	219		Stain 1 Positive Cells	177		Stain 1 Positive Cells	89		Stain 1 Positive Cells	312		Stain 1 Positive Cells	319		Stain 1 Positive Cells	623		Stain 1 Positive Cells	167
	Stain 1 0+ Cells	3204		Stain 1 0+ Cells	3630		Stain 1 0+ Cells	3411		Stain 1 0+ Cells	3418		Stain 1 0+ Cells	2677		Stain 1 0+ Cells	3754		Stain 1 0+ Cells	5826		Stain 1 0+ Cells	3593
	Stain 1 1+ Cells	75		Stain 1 1+ Cells	92		Stain 1 1+ Cells	63		Stain 1 1+ Cells	34		Stain 1 1+ Cells	105		Stain 1 1+ Cells	121		Stain 1 1+ Cells	284		Stain 1 1+ Cells	85
	Stain 1 2+ Cells	58		Stain 1 2+ Cells	102		Stain 1 2+ Cells	84		Stain 1 2+ Cells	37		Stain 1 2+ Cells	146		Stain 1 2+ Cells	155		Stain 1 2+ Cells	290		Stain 1 2+ Cells	68
	Stain 1 3+ Cells	12		Stain 1 3+ Cells	25		Stain 1 3+ Cells	30		Stain 1 3+ Cells	18		Stain 1 3+ Cells	61		Stain 1 3+ Cells	43		Stain 1 3+ Cells	49		Stain 1 3+ Cells	14
	Stain 2 Positive Cells	0		Stain 2 Positive Cells	0		Stain 2 Positive Cells	0		Stain 2 Positive Cells	0		Stain 2 Positive Cells	0		Stain 2 Positive Cells	0		Stain 2 Positive Cells	0		Stain 2 Positive Cells	0
	Stain 2 0+ Cells	3349		Stain 2 0+ Cells	3849		Stain 2 0+ Cells	3588		Stain 2 0+ Cells	3507		Stain 2 0+ Cells	2989		Stain 2 0+ Cells	4073		Stain 2 0+ Cells	6449		Stain 2 0+ Cells	3760
	Stain 2 1+ Cells	0		Stain 2 1+ Cells	0		Stain 2 1+ Cells	0		Stain 2 1+ Cells	0		Stain 2 1+ Cells	0		Stain 2 1+ Cells	0		Stain 2 1+ Cells	0		Stain 2 1+ Cells	0
	Stain 2 2+ Cells	0		Stain 2 2+ Cells	0		Stain 2 2+ Cells	0		Stain 2 2+ Cells	0		Stain 2 2+ Cells	0		Stain 2 2+ Cells	0		Stain 2 2+ Cells	0		Stain 2 2+ Cells	0
	Stain 2 3+ Cells	0		Stain 2 3+ Cells	0		Stain 2 3+ Cells	0		Stain 2 3+ Cells	0		Stain 2 3+ Cells	0		Stain 2 3+ Cells	0		Stain 2 3+ Cells	0		Stain 2 3+ Cells	0
	Dual Positive Cells	0		Dual Positive Cells	0		Dual Positive Cells	0		Dual Positive Cells	0		Dual Positive Cells	0		Dual Positive Cells	0		Dual Positive Cells	0		Dual Positive Cells	0
	Dual Negative Cells	3204		Dual Negative Cells	3630		Dual Negative Cells	3411		Dual Negative Cells	3418		Dual Negative Cells	2677		Dual Negative Cells	3754		Dual Negative Cells	5826		Dual Negative Cells	3593
	% Stain 1 Positive Cells	4.32965		% Stain 1 Positive Cells	5.68979		% Stain 1 Positive Cells	4.93311		% Stain 1 Positive Cells	2.53778		% Stain 1 Positive Cells	10.4383		% Stain 1 Positive Cells	7.83206		% Stain 1 Positive Cells	9.66041		% Stain 1 Positive Cells	4.44149		6.23282
	% Stain 1 0+ Cells	95.6703		% Stain 1 0+ Cells	94.3102		% Stain 1 0+ Cells	95.0669		% Stain 1 0+ Cells	97.4622		% Stain 1 0+ Cells	89.5617		% Stain 1 0+ Cells	92.1679		% Stain 1 0+ Cells	90.3396		% Stain 1 0+ Cells	95.5585
	% Stain 1 1+ Cells	2.23947		% Stain 1 1+ Cells	2.39023		% Stain 1 1+ Cells	1.75585		% Stain 1 1+ Cells	0.96949		% Stain 1 1+ Cells	3.51288		% Stain 1 1+ Cells	2.97078		% Stain 1 1+ Cells	4.40378		% Stain 1 1+ Cells	2.26064
	% Stain 1 2+ Cells	1.73186		% Stain 1 2+ Cells	2.65004		% Stain 1 2+ Cells	2.34114		% Stain 1 2+ Cells	1.05503		% Stain 1 2+ Cells	4.88458		% Stain 1 2+ Cells	3.80555		% Stain 1 2+ Cells	4.49682		% Stain 1 2+ Cells	1.80851
	% Stain 1 3+ Cells	0.358316		% Stain 1 3+ Cells	0.649519		% Stain 1 3+ Cells	0.83612		% Stain 1 3+ Cells	0.513259		% Stain 1 3+ Cells	2.04082		% Stain 1 3+ Cells	1.05573		% Stain 1 3+ Cells	0.759808		% Stain 1 3+ Cells	0.37234
	Stain 1 H-Score	6.77814		Stain 1 H-Score	9.63887		Stain 1 H-Score	8.94649		Stain 1 H-Score	4.61933		Stain 1 H-Score	19.4045		Stain 1 H-Score	13.7491		Stain 1 H-Score	15.6768		Stain 1 H-Score	6.99468
	% Stain 2 Positive Cells	0		% Stain 2 Positive Cells	0		% Stain 2 Positive Cells	0		% Stain 2 Positive Cells	0		% Stain 2 Positive Cells	0		% Stain 2 Positive Cells	0		% Stain 2 Positive Cells	0		% Stain 2 Positive Cells	0
	% Stain 2 0+ Cells	100		% Stain 2 0+ Cells	100		% Stain 2 0+ Cells	100		% Stain 2 0+ Cells	100		% Stain 2 0+ Cells	100		% Stain 2 0+ Cells	100		% Stain 2 0+ Cells	100		% Stain 2 0+ Cells	100
	% Stain 2 1+ Cells	0		% Stain 2 1+ Cells	0		% Stain 2 1+ Cells	0		% Stain 2 1+ Cells	0		% Stain 2 1+ Cells	0		% Stain 2 1+ Cells	0		% Stain 2 1+ Cells	0		% Stain 2 1+ Cells	0
	% Stain 2 2+ Cells	0		% Stain 2 2+ Cells	0		% Stain 2 2+ Cells	0		% Stain 2 2+ Cells	0		% Stain 2 2+ Cells	0		% Stain 2 2+ Cells	0		% Stain 2 2+ Cells	0		% Stain 2 2+ Cells	0
	% Stain 2 3+ Cells	0		% Stain 2 3+ Cells	0		% Stain 2 3+ Cells	0		% Stain 2 3+ Cells	0		% Stain 2 3+ Cells	0		% Stain 2 3+ Cells	0		% Stain 2 3+ Cells	0		% Stain 2 3+ Cells	0
	Stain 2 H-Score	0		Stain 2 H-Score	0		Stain 2 H-Score	0		Stain 2 H-Score	0		Stain 2 H-Score	0		Stain 2 H-Score	0		Stain 2 H-Score	0		Stain 2 H-Score	0
	% Dual Positive Cells	0		% Dual Positive Cells	0		% Dual Positive Cells	0		% Dual Positive Cells	0		% Dual Positive Cells	0		% Dual Positive Cells	0		% Dual Positive Cells	0		% Dual Positive Cells	0
	% Dual Negative Cells	95.6703		% Dual Negative Cells	94.3102		% Dual Negative Cells	95.0669		% Dual Negative Cells	97.4622		% Dual Negative Cells	89.5617		% Dual Negative Cells	92.1679		% Dual Negative Cells	90.3396		% Dual Negative Cells	95.5585
	Avg Stain 1 Nuclear OD	0.0554873		Avg Stain 1 Nuclear OD	0.0598376		Avg Stain 1 Nuclear OD	0.0586334		Avg Stain 1 Nuclear OD	0.0522858		Avg Stain 1 Nuclear OD	0.0772584		Avg Stain 1 Nuclear OD	0.0662156		Avg Stain 1 Nuclear OD	0.0690821		Avg Stain 1 Nuclear OD	0.0548483
	Avg Stain 2 Nuclear OD	0.0338185		Avg Stain 2 Nuclear OD	0.0343755		Avg Stain 2 Nuclear OD	0.0339178		Avg Stain 2 Nuclear OD	0.0336652		Avg Stain 2 Nuclear OD	0.0335343		Avg Stain 2 Nuclear OD	0.0334274		Avg Stain 2 Nuclear OD	0.0337236		Avg Stain 2 Nuclear OD	0.0342459
	Avg Stain 1 Cytoplasmic OD	0.0449914		Avg Stain 1 Cytoplasmic OD	0.0402851		Avg Stain 1 Cytoplasmic OD	0.0435483		Avg Stain 1 Cytoplasmic OD	0.042846		Avg Stain 1 Cytoplasmic OD	0.0421191		Avg Stain 1 Cytoplasmic OD	0.0419107		Avg Stain 1 Cytoplasmic OD	0.0455862		Avg Stain 1 Cytoplasmic OD	0.0416624
	Avg Stain 2 Cytoplasmic OD	0.0314974		Avg Stain 2 Cytoplasmic OD	0.031552		Avg Stain 2 Cytoplasmic OD	0.031489		Avg Stain 2 Cytoplasmic OD	0.031422		Avg Stain 2 Cytoplasmic OD	0.0310182		Avg Stain 2 Cytoplasmic OD	0.0310455		Avg Stain 2 Cytoplasmic OD	0.0314431		Avg Stain 2 Cytoplasmic OD	0.0315502
	Avg Cell Area (µm²)	99.1282		Avg Cell Area (µm²)	94.6877		Avg Cell Area (µm²)	97.4406		Avg Cell Area (µm²)	99.525		Avg Cell Area (µm²)	125.99		Avg Cell Area (µm²)	117.885		Avg Cell Area (µm²)	89.9308		Avg Cell Area (µm²)	98.464
	Avg Cytoplasm Area (µm²)	75.3603		Avg Cytoplasm Area (µm²)	71.2606		Avg Cytoplasm Area (µm²)	73.1703		Avg Cytoplasm Area (µm²)	76.1937		Avg Cytoplasm Area (µm²)	97.6698		Avg Cytoplasm Area (µm²)	92.1241		Avg Cytoplasm Area (µm²)	65.3542		Avg Cytoplasm Area (µm²)	74.9489
	Avg Nucleus Area (µm²)	23.7678		Avg Nucleus Area (µm²)	23.4271		Avg Nucleus Area (µm²)	24.2703		Avg Nucleus Area (µm²)	23.3313		Avg Nucleus Area (µm²)	28.3205		Avg Nucleus Area (µm²)	25.7612		Avg Nucleus Area (µm²)	24.5766		Avg Nucleus Area (µm²)	23.5151
	Avg Nucleus Perimeter (µm)	20.2252		Avg Nucleus Perimeter (µm)	20.0618		Avg Nucleus Perimeter (µm)	20.4099		Avg Nucleus Perimeter (µm)	20.0616		Avg Nucleus Perimeter (µm)	22.0308		Avg Nucleus Perimeter (µm)	20.9519		Avg Nucleus Perimeter (µm)	20.5121		Avg Nucleus Perimeter (µm)	20.0541
	Avg Nucleus Roundness	0.694119		Avg Nucleus Roundness	0.688008		Avg Nucleus Roundness	0.692298		Avg Nucleus Roundness	0.689588		Avg Nucleus Roundness	0.70471		Avg Nucleus Roundness	0.697921		Avg Nucleus Roundness	0.688441		Avg Nucleus Roundness	0.690312
	Tissue Area (µm²)	409990		Tissue Area (µm²)	454941		Tissue Area (µm²)	431834		Tissue Area (µm²)	456405		Tissue Area (µm²)	467506		Tissue Area (µm²)	602468		Tissue Area (µm²)	700308		Tissue Area (µm²)	476925
	hom	64.1e
	Name	Value		Name	Value		Name	Value		Name	Value		Name	Value		Name	Value		Name	Value		Name	Value
	Total Cells	3920		Total Cells	4609		Total Cells	5642		Total Cells	4221		Total Cells	3208		Total Cells	3330		Total Cells	5165		Total Cells	4818
	Stain 1 Positive Cells	424		Stain 1 Positive Cells	715		Stain 1 Positive Cells	614		Stain 1 Positive Cells	521		Stain 1 Positive Cells	202		Stain 1 Positive Cells	110		Stain 1 Positive Cells	385		Stain 1 Positive Cells	564
	Stain 1 0+ Cells	3496		Stain 1 0+ Cells	3894		Stain 1 0+ Cells	5028		Stain 1 0+ Cells	3700		Stain 1 0+ Cells	3006		Stain 1 0+ Cells	3220		Stain 1 0+ Cells	4780		Stain 1 0+ Cells	4254
	Stain 1 1+ Cells	97		Stain 1 1+ Cells	246		Stain 1 1+ Cells	210		Stain 1 1+ Cells	150		Stain 1 1+ Cells	52		Stain 1 1+ Cells	36		Stain 1 1+ Cells	100		Stain 1 1+ Cells	194
	Stain 1 2+ Cells	206		Stain 1 2+ Cells	325		Stain 1 2+ Cells	311		Stain 1 2+ Cells	250		Stain 1 2+ Cells	87		Stain 1 2+ Cells	50		Stain 1 2+ Cells	181		Stain 1 2+ Cells	283
	Stain 1 3+ Cells	121		Stain 1 3+ Cells	144		Stain 1 3+ Cells	93		Stain 1 3+ Cells	121		Stain 1 3+ Cells	63		Stain 1 3+ Cells	24		Stain 1 3+ Cells	104		Stain 1 3+ Cells	87
	Stain 2 Positive Cells	0		Stain 2 Positive Cells	0		Stain 2 Positive Cells	0		Stain 2 Positive Cells	0		Stain 2 Positive Cells	0		Stain 2 Positive Cells	0		Stain 2 Positive Cells	0		Stain 2 Positive Cells	0
	Stain 2 0+ Cells	3920		Stain 2 0+ Cells	4609		Stain 2 0+ Cells	5642		Stain 2 0+ Cells	4221		Stain 2 0+ Cells	3208		Stain 2 0+ Cells	3330		Stain 2 0+ Cells	5165		Stain 2 0+ Cells	4818
	Stain 2 1+ Cells	0		Stain 2 1+ Cells	0		Stain 2 1+ Cells	0		Stain 2 1+ Cells	0		Stain 2 1+ Cells	0		Stain 2 1+ Cells	0		Stain 2 1+ Cells	0		Stain 2 1+ Cells	0
	Stain 2 2+ Cells	0		Stain 2 2+ Cells	0		Stain 2 2+ Cells	0		Stain 2 2+ Cells	0		Stain 2 2+ Cells	0		Stain 2 2+ Cells	0		Stain 2 2+ Cells	0		Stain 2 2+ Cells	0
	Stain 2 3+ Cells	0		Stain 2 3+ Cells	0		Stain 2 3+ Cells	0		Stain 2 3+ Cells	0		Stain 2 3+ Cells	0		Stain 2 3+ Cells	0		Stain 2 3+ Cells	0		Stain 2 3+ Cells	0
	Dual Positive Cells	0		Dual Positive Cells	0		Dual Positive Cells	0		Dual Positive Cells	0		Dual Positive Cells	0		Dual Positive Cells	0		Dual Positive Cells	0		Dual Positive Cells	0
	Dual Negative Cells	3496		Dual Negative Cells	3894		Dual Negative Cells	5028		Dual Negative Cells	3700		Dual Negative Cells	3006		Dual Negative Cells	3220		Dual Negative Cells	4780		Dual Negative Cells	4254
	% Stain 1 Positive Cells	10.8163		% Stain 1 Positive Cells	15.5131		% Stain 1 Positive Cells	10.8827		% Stain 1 Positive Cells	12.343		% Stain 1 Positive Cells	6.29676		% Stain 1 Positive Cells	3.3033		% Stain 1 Positive Cells	7.45402		% Stain 1 Positive Cells	11.7061		9.78941
	% Stain 1 0+ Cells	89.1837		% Stain 1 0+ Cells	84.4869		% Stain 1 0+ Cells	89.1173		% Stain 1 0+ Cells	87.657		% Stain 1 0+ Cells	93.7032		% Stain 1 0+ Cells	96.6967		% Stain 1 0+ Cells	92.546		% Stain 1 0+ Cells	88.2939
	% Stain 1 1+ Cells	2.47449		% Stain 1 1+ Cells	5.33738		% Stain 1 1+ Cells	3.72208		% Stain 1 1+ Cells	3.55366		% Stain 1 1+ Cells	1.62095		% Stain 1 1+ Cells	1.08108		% Stain 1 1+ Cells	1.93611		% Stain 1 1+ Cells	4.02657
	% Stain 1 2+ Cells	5.2551		% Stain 1 2+ Cells	7.05142		% Stain 1 2+ Cells	5.51223		% Stain 1 2+ Cells	5.92277		% Stain 1 2+ Cells	2.71197		% Stain 1 2+ Cells	1.5015		% Stain 1 2+ Cells	3.50436		% Stain 1 2+ Cells	5.87381
	% Stain 1 3+ Cells	3.08673		% Stain 1 3+ Cells	3.12432		% Stain 1 3+ Cells	1.64835		% Stain 1 3+ Cells	2.86662		% Stain 1 3+ Cells	1.96384		% Stain 1 3+ Cells	0.720721		% Stain 1 3+ Cells	2.01355		% Stain 1 3+ Cells	1.80573
	Stain 1 H-Score	22.2449		Stain 1 H-Score	28.8132		Stain 1 H-Score	19.6916		Stain 1 H-Score	23.9991		Stain 1 H-Score	12.9364		Stain 1 H-Score	6.24625		Stain 1 H-Score	14.9855		Stain 1 H-Score	21.1914
	% Stain 2 Positive Cells	0		% Stain 2 Positive Cells	0		% Stain 2 Positive Cells	0		% Stain 2 Positive Cells	0		% Stain 2 Positive Cells	0		% Stain 2 Positive Cells	0		% Stain 2 Positive Cells	0		% Stain 2 Positive Cells	0
	% Stain 2 0+ Cells	100		% Stain 2 0+ Cells	100		% Stain 2 0+ Cells	100		% Stain 2 0+ Cells	100		% Stain 2 0+ Cells	100		% Stain 2 0+ Cells	100		% Stain 2 0+ Cells	100		% Stain 2 0+ Cells	100
	% Stain 2 1+ Cells	0		% Stain 2 1+ Cells	0		% Stain 2 1+ Cells	0		% Stain 2 1+ Cells	0		% Stain 2 1+ Cells	0		% Stain 2 1+ Cells	0		% Stain 2 1+ Cells	0		% Stain 2 1+ Cells	0
	% Stain 2 2+ Cells	0		% Stain 2 2+ Cells	0		% Stain 2 2+ Cells	0		% Stain 2 2+ Cells	0		% Stain 2 2+ Cells	0		% Stain 2 2+ Cells	0		% Stain 2 2+ Cells	0		% Stain 2 2+ Cells	0
	% Stain 2 3+ Cells	0		% Stain 2 3+ Cells	0		% Stain 2 3+ Cells	0		% Stain 2 3+ Cells	0		% Stain 2 3+ Cells	0		% Stain 2 3+ Cells	0		% Stain 2 3+ Cells	0		% Stain 2 3+ Cells	0
	Stain 2 H-Score	0		Stain 2 H-Score	0		Stain 2 H-Score	0		Stain 2 H-Score	0		Stain 2 H-Score	0		Stain 2 H-Score	0		Stain 2 H-Score	0		Stain 2 H-Score	0
	% Dual Positive Cells	0		% Dual Positive Cells	0		% Dual Positive Cells	0		% Dual Positive Cells	0		% Dual Positive Cells	0		% Dual Positive Cells	0		% Dual Positive Cells	0		% Dual Positive Cells	0
	% Dual Negative Cells	89.1837		% Dual Negative Cells	84.4869		% Dual Negative Cells	89.1173		% Dual Negative Cells	87.657		% Dual Negative Cells	93.7032		% Dual Negative Cells	96.6967		% Dual Negative Cells	92.546		% Dual Negative Cells	88.2939
	Avg Stain 1 Nuclear OD	0.084016		Avg Stain 1 Nuclear OD	0.0967653		Avg Stain 1 Nuclear OD	0.0772068		Avg Stain 1 Nuclear OD	0.0872981		Avg Stain 1 Nuclear OD	0.0689046		Avg Stain 1 Nuclear OD	0.0510445		Avg Stain 1 Nuclear OD	0.0694623		Avg Stain 1 Nuclear OD	0.0780345
	Avg Stain 2 Nuclear OD	0.0353317		Avg Stain 2 Nuclear OD	0.0346353		Avg Stain 2 Nuclear OD	0.0346849		Avg Stain 2 Nuclear OD	0.0345439		Avg Stain 2 Nuclear OD	0.0345356		Avg Stain 2 Nuclear OD	0.0343577		Avg Stain 2 Nuclear OD	0.0344865		Avg Stain 2 Nuclear OD	0.0349675
	Avg Stain 1 Cytoplasmic OD	0.0428811		Avg Stain 1 Cytoplasmic OD	0.0487242		Avg Stain 1 Cytoplasmic OD	0.0449603		Avg Stain 1 Cytoplasmic OD	0.0460181		Avg Stain 1 Cytoplasmic OD	0.0455217		Avg Stain 1 Cytoplasmic OD	0.0389579		Avg Stain 1 Cytoplasmic OD	0.0429139		Avg Stain 1 Cytoplasmic OD	0.0406441
	Avg Stain 2 Cytoplasmic OD	0.0314767		Avg Stain 2 Cytoplasmic OD	0.0312313		Avg Stain 2 Cytoplasmic OD	0.0314501		Avg Stain 2 Cytoplasmic OD	0.0312429		Avg Stain 2 Cytoplasmic OD	0.0317414		Avg Stain 2 Cytoplasmic OD	0.0317778		Avg Stain 2 Cytoplasmic OD	0.0315209		Avg Stain 2 Cytoplasmic OD	0.0315241
	Avg Cell Area (µm²)	100.559		Avg Cell Area (µm²)	110.55		Avg Cell Area (µm²)	103.298		Avg Cell Area (µm²)	110.702		Avg Cell Area (µm²)	100.078		Avg Cell Area (µm²)	105.021		Avg Cell Area (µm²)	103.431		Avg Cell Area (µm²)	101.44
	Avg Cytoplasm Area (µm²)	76.2524		Avg Cytoplasm Area (µm²)	84.3094		Avg Cytoplasm Area (µm²)	78.2931		Avg Cytoplasm Area (µm²)	84.524		Avg Cytoplasm Area (µm²)	74.1368		Avg Cytoplasm Area (µm²)	80.0837		Avg Cytoplasm Area (µm²)	78.1941		Avg Cytoplasm Area (µm²)	76.8689
	Avg Nucleus Area (µm²)	24.307		Avg Nucleus Area (µm²)	26.2403		Avg Nucleus Area (µm²)	25.0051		Avg Nucleus Area (µm²)	26.1781		Avg Nucleus Area (µm²)	25.9416		Avg Nucleus Area (µm²)	24.9375		Avg Nucleus Area (µm²)	25.2374		Avg Nucleus Area (µm²)	24.5708
	Avg Nucleus Perimeter (µm)	20.3978		Avg Nucleus Perimeter (µm)	21.1839		Avg Nucleus Perimeter (µm)	20.7423		Avg Nucleus Perimeter (µm)	21.1141		Avg Nucleus Perimeter (µm)	20.9576		Avg Nucleus Perimeter (µm)	20.5825		Avg Nucleus Perimeter (µm)	20.7577		Avg Nucleus Perimeter (µm)	20.4937
	Avg Nucleus Roundness	0.684856		Avg Nucleus Roundness	0.691084		Avg Nucleus Roundness	0.685996		Avg Nucleus Roundness	0.693311		Avg Nucleus Roundness	0.699126		Avg Nucleus Roundness	0.696631		Avg Nucleus Roundness	0.692403		Avg Nucleus Roundness	0.687971
	Tissue Area (µm²)	507260		Tissue Area (µm²)	657181		Tissue Area (µm²)	740521		Tissue Area (µm²)	578680		Tissue Area (µm²)	405283		Tissue Area (µm²)	434207		Tissue Area (µm²)	675593		Tissue Area (µm²)	603636
	BSNA 90.2e	HOM
	Name	Value		Name	Value		Name	Value		Name	Value		Name	Value		Name	Value		Name	Value		Name	Value
	Total Cells	5476		Total Cells	2914		Total Cells	5365		Total Cells	4702		Total Cells	6476		Total Cells	4733		Total Cells	4311		Total Cells	3785
	Stain 1 Positive Cells	509		Stain 1 Positive Cells	666		Stain 1 Positive Cells	753		Stain 1 Positive Cells	1111		Stain 1 Positive Cells	413		Stain 1 Positive Cells	787		Stain 1 Positive Cells	929		Stain 1 Positive Cells	314
	Stain 1 0+ Cells	4967		Stain 1 0+ Cells	2248		Stain 1 0+ Cells	4612		Stain 1 0+ Cells	3591		Stain 1 0+ Cells	6063		Stain 1 0+ Cells	3946		Stain 1 0+ Cells	3382		Stain 1 0+ Cells	3471
	Stain 1 1+ Cells	144		Stain 1 1+ Cells	177		Stain 1 1+ Cells	170		Stain 1 1+ Cells	331		Stain 1 1+ Cells	146		Stain 1 1+ Cells	195		Stain 1 1+ Cells	230		Stain 1 1+ Cells	53
	Stain 1 2+ Cells	233		Stain 1 2+ Cells	427		Stain 1 2+ Cells	370		Stain 1 2+ Cells	637		Stain 1 2+ Cells	149		Stain 1 2+ Cells	429		Stain 1 2+ Cells	481		Stain 1 2+ Cells	147
	Stain 1 3+ Cells	132		Stain 1 3+ Cells	62		Stain 1 3+ Cells	213		Stain 1 3+ Cells	143		Stain 1 3+ Cells	118		Stain 1 3+ Cells	163		Stain 1 3+ Cells	218		Stain 1 3+ Cells	114
	Stain 2 Positive Cells	0		Stain 2 Positive Cells	0		Stain 2 Positive Cells	0		Stain 2 Positive Cells	0		Stain 2 Positive Cells	0		Stain 2 Positive Cells	0		Stain 2 Positive Cells	0		Stain 2 Positive Cells	0
	Stain 2 0+ Cells	5476		Stain 2 0+ Cells	2914		Stain 2 0+ Cells	5365		Stain 2 0+ Cells	4702		Stain 2 0+ Cells	6476		Stain 2 0+ Cells	4733		Stain 2 0+ Cells	4311		Stain 2 0+ Cells	3785
	Stain 2 1+ Cells	0		Stain 2 1+ Cells	0		Stain 2 1+ Cells	0		Stain 2 1+ Cells	0		Stain 2 1+ Cells	0		Stain 2 1+ Cells	0		Stain 2 1+ Cells	0		Stain 2 1+ Cells	0
	Stain 2 2+ Cells	0		Stain 2 2+ Cells	0		Stain 2 2+ Cells	0		Stain 2 2+ Cells	0		Stain 2 2+ Cells	0		Stain 2 2+ Cells	0		Stain 2 2+ Cells	0		Stain 2 2+ Cells	0
	Stain 2 3+ Cells	0		Stain 2 3+ Cells	0		Stain 2 3+ Cells	0		Stain 2 3+ Cells	0		Stain 2 3+ Cells	0		Stain 2 3+ Cells	0		Stain 2 3+ Cells	0		Stain 2 3+ Cells	0
	Dual Positive Cells	0		Dual Positive Cells	0		Dual Positive Cells	0		Dual Positive Cells	0		Dual Positive Cells	0		Dual Positive Cells	0		Dual Positive Cells	0		Dual Positive Cells	0
	Dual Negative Cells	4967		Dual Negative Cells	2248		Dual Negative Cells	4612		Dual Negative Cells	3591		Dual Negative Cells	6063		Dual Negative Cells	3946		Dual Negative Cells	3382		Dual Negative Cells	3471
	% Stain 1 Positive Cells	9.29511		% Stain 1 Positive Cells	22.8552		% Stain 1 Positive Cells	14.0354		% Stain 1 Positive Cells	23.6282		% Stain 1 Positive Cells	6.37739		% Stain 1 Positive Cells	16.6279		% Stain 1 Positive Cells	21.5495		% Stain 1 Positive Cells	8.2959		15.3331
	% Stain 1 0+ Cells	90.7049		% Stain 1 0+ Cells	77.1448		% Stain 1 0+ Cells	85.9646		% Stain 1 0+ Cells	76.3718		% Stain 1 0+ Cells	93.6226		% Stain 1 0+ Cells	83.3721		% Stain 1 0+ Cells	78.4505		% Stain 1 0+ Cells	91.7041
	% Stain 1 1+ Cells	2.62966		% Stain 1 1+ Cells	6.07412		% Stain 1 1+ Cells	3.16869		% Stain 1 1+ Cells	7.03956		% Stain 1 1+ Cells	2.25448		% Stain 1 1+ Cells	4.12001		% Stain 1 1+ Cells	5.33519		% Stain 1 1+ Cells	1.40026
	% Stain 1 2+ Cells	4.25493		% Stain 1 2+ Cells	14.6534		% Stain 1 2+ Cells	6.89655		% Stain 1 2+ Cells	13.5474		% Stain 1 2+ Cells	2.3008		% Stain 1 2+ Cells	9.06402		% Stain 1 2+ Cells	11.1575		% Stain 1 2+ Cells	3.88375
	% Stain 1 3+ Cells	2.41052		% Stain 1 3+ Cells	2.12766		% Stain 1 3+ Cells	3.97018		% Stain 1 3+ Cells	3.04126		% Stain 1 3+ Cells	1.82211		% Stain 1 3+ Cells	3.4439		% Stain 1 3+ Cells	5.05683		% Stain 1 3+ Cells	3.01189
	Stain 1 H-Score	18.3711		Stain 1 H-Score	41.7639		Stain 1 H-Score	28.8723		Stain 1 H-Score	43.2582		Stain 1 H-Score	12.3224		Stain 1 H-Score	32.5798		Stain 1 H-Score	42.8207		Stain 1 H-Score	18.2034
	% Stain 2 Positive Cells	0		% Stain 2 Positive Cells	0		% Stain 2 Positive Cells	0		% Stain 2 Positive Cells	0		% Stain 2 Positive Cells	0		% Stain 2 Positive Cells	0		% Stain 2 Positive Cells	0		% Stain 2 Positive Cells	0
	% Stain 2 0+ Cells	100		% Stain 2 0+ Cells	100		% Stain 2 0+ Cells	100		% Stain 2 0+ Cells	100		% Stain 2 0+ Cells	100		% Stain 2 0+ Cells	100		% Stain 2 0+ Cells	100		% Stain 2 0+ Cells	100
	% Stain 2 1+ Cells	0		% Stain 2 1+ Cells	0		% Stain 2 1+ Cells	0		% Stain 2 1+ Cells	0		% Stain 2 1+ Cells	0		% Stain 2 1+ Cells	0		% Stain 2 1+ Cells	0		% Stain 2 1+ Cells	0
	% Stain 2 2+ Cells	0		% Stain 2 2+ Cells	0		% Stain 2 2+ Cells	0		% Stain 2 2+ Cells	0		% Stain 2 2+ Cells	0		% Stain 2 2+ Cells	0		% Stain 2 2+ Cells	0		% Stain 2 2+ Cells	0
	% Stain 2 3+ Cells	0		% Stain 2 3+ Cells	0		% Stain 2 3+ Cells	0		% Stain 2 3+ Cells	0		% Stain 2 3+ Cells	0		% Stain 2 3+ Cells	0		% Stain 2 3+ Cells	0		% Stain 2 3+ Cells	0
	Stain 2 H-Score	0		Stain 2 H-Score	0		Stain 2 H-Score	0		Stain 2 H-Score	0		Stain 2 H-Score	0		Stain 2 H-Score	0		Stain 2 H-Score	0		Stain 2 H-Score	0
	% Dual Positive Cells	0		% Dual Positive Cells	0		% Dual Positive Cells	0		% Dual Positive Cells	0		% Dual Positive Cells	0		% Dual Positive Cells	0		% Dual Positive Cells	0		% Dual Positive Cells	0
	% Dual Negative Cells	90.7049		% Dual Negative Cells	77.1448		% Dual Negative Cells	85.9646		% Dual Negative Cells	76.3718		% Dual Negative Cells	93.6226		% Dual Negative Cells	83.3721		% Dual Negative Cells	78.4505		% Dual Negative Cells	91.7041
	Avg Stain 1 Nuclear OD	0.0688563		Avg Stain 1 Nuclear OD	0.11248		Avg Stain 1 Nuclear OD	0.0881679		Avg Stain 1 Nuclear OD	0.117306		Avg Stain 1 Nuclear OD	0.057041		Avg Stain 1 Nuclear OD	0.0991131		Avg Stain 1 Nuclear OD	0.120429		Avg Stain 1 Nuclear OD	0.0689383
	Avg Stain 2 Nuclear OD	0.033538		Avg Stain 2 Nuclear OD	0.0338836		Avg Stain 2 Nuclear OD	0.034085		Avg Stain 2 Nuclear OD	0.0339154		Avg Stain 2 Nuclear OD	0.0331882		Avg Stain 2 Nuclear OD	0.0337634		Avg Stain 2 Nuclear OD	0.0343428		Avg Stain 2 Nuclear OD	0.0334458
	Avg Stain 1 Cytoplasmic OD	0.0377449		Avg Stain 1 Cytoplasmic OD	0.0435821		Avg Stain 1 Cytoplasmic OD	0.0391703		Avg Stain 1 Cytoplasmic OD	0.04382		Avg Stain 1 Cytoplasmic OD	0.0355403		Avg Stain 1 Cytoplasmic OD	0.0426363		Avg Stain 1 Cytoplasmic OD	0.0473222		Avg Stain 1 Cytoplasmic OD	0.03736
	Avg Stain 2 Cytoplasmic OD	0.0314503		Avg Stain 2 Cytoplasmic OD	0.0314269		Avg Stain 2 Cytoplasmic OD	0.0314528		Avg Stain 2 Cytoplasmic OD	0.0311986		Avg Stain 2 Cytoplasmic OD	0.0315521		Avg Stain 2 Cytoplasmic OD	0.0310907		Avg Stain 2 Cytoplasmic OD	0.031098		Avg Stain 2 Cytoplasmic OD	0.0313283
	Avg Cell Area (µm²)	124.191		Avg Cell Area (µm²)	135.17		Avg Cell Area (µm²)	122.766		Avg Cell Area (µm²)	128.333		Avg Cell Area (µm²)	115.134		Avg Cell Area (µm²)	124.943		Avg Cell Area (µm²)	120.582		Avg Cell Area (µm²)	124.655
	Avg Cytoplasm Area (µm²)	99.594		Avg Cytoplasm Area (µm²)	109.351		Avg Cytoplasm Area (µm²)	96.8528		Avg Cytoplasm Area (µm²)	102.118		Avg Cytoplasm Area (µm²)	92.2638		Avg Cytoplasm Area (µm²)	100.986		Avg Cytoplasm Area (µm²)	94.2933		Avg Cytoplasm Area (µm²)	101.228
	Avg Nucleus Area (µm²)	24.5971		Avg Nucleus Area (µm²)	25.819		Avg Nucleus Area (µm²)	25.9136		Avg Nucleus Area (µm²)	26.2152		Avg Nucleus Area (µm²)	22.8704		Avg Nucleus Area (µm²)	23.9562		Avg Nucleus Area (µm²)	26.2886		Avg Nucleus Area (µm²)	23.4268
	Avg Nucleus Perimeter (µm)	20.4023		Avg Nucleus Perimeter (µm)	20.6651		Avg Nucleus Perimeter (µm)	20.7192		Avg Nucleus Perimeter (µm)	20.9026		Avg Nucleus Perimeter (µm)	19.594		Avg Nucleus Perimeter (µm)	19.8769		Avg Nucleus Perimeter (µm)	20.9271		Avg Nucleus Perimeter (µm)	19.6396
	Avg Nucleus Roundness	0.705978		Avg Nucleus Roundness	0.713871		Avg Nucleus Roundness	0.70602		Avg Nucleus Roundness	0.710649		Avg Nucleus Roundness	0.702323		Avg Nucleus Roundness	0.705846		Avg Nucleus Roundness	0.705391		Avg Nucleus Roundness	0.70887
	Tissue Area (µm²)	898678		Tissue Area (µm²)	528744		Tissue Area (µm²)	832921		Tissue Area (µm²)	787058		Tissue Area (µm²)	1001440		Tissue Area (µm²)	784402		Tissue Area (µm²)	641439		Tissue Area (µm²)	619996
	BSNA87.2d	WT
	Name	Value		Name	Value		Name	Value		Name	Value		Name	Value		Name	Value		Name	Value		Name	Value
	Total Cells	4892		Total Cells	4396		Total Cells	3346		Total Cells	3054		Total Cells	4077		Total Cells	4040		Total Cells	3058		Total Cells	3221
	Stain 1 Positive Cells	228		Stain 1 Positive Cells	78		Stain 1 Positive Cells	120		Stain 1 Positive Cells	34		Stain 1 Positive Cells	210		Stain 1 Positive Cells	51		Stain 1 Positive Cells	28		Stain 1 Positive Cells	44
	Stain 1 0+ Cells	4664		Stain 1 0+ Cells	4318		Stain 1 0+ Cells	3226		Stain 1 0+ Cells	3020		Stain 1 0+ Cells	3867		Stain 1 0+ Cells	3989		Stain 1 0+ Cells	3030		Stain 1 0+ Cells	3177
	Stain 1 1+ Cells	60		Stain 1 1+ Cells	11		Stain 1 1+ Cells	24		Stain 1 1+ Cells	13		Stain 1 1+ Cells	55		Stain 1 1+ Cells	14		Stain 1 1+ Cells	2		Stain 1 1+ Cells	14
	Stain 1 2+ Cells	103		Stain 1 2+ Cells	36		Stain 1 2+ Cells	59		Stain 1 2+ Cells	14		Stain 1 2+ Cells	83		Stain 1 2+ Cells	19		Stain 1 2+ Cells	16		Stain 1 2+ Cells	12
	Stain 1 3+ Cells	65		Stain 1 3+ Cells	31		Stain 1 3+ Cells	37		Stain 1 3+ Cells	7		Stain 1 3+ Cells	72		Stain 1 3+ Cells	18		Stain 1 3+ Cells	10		Stain 1 3+ Cells	18
	Stain 2 Positive Cells	0		Stain 2 Positive Cells	0		Stain 2 Positive Cells	0		Stain 2 Positive Cells	0		Stain 2 Positive Cells	0		Stain 2 Positive Cells	0		Stain 2 Positive Cells	0		Stain 2 Positive Cells	0
	Stain 2 0+ Cells	4892		Stain 2 0+ Cells	4396		Stain 2 0+ Cells	3346		Stain 2 0+ Cells	3054		Stain 2 0+ Cells	4077		Stain 2 0+ Cells	4040		Stain 2 0+ Cells	3058		Stain 2 0+ Cells	3221
	Stain 2 1+ Cells	0		Stain 2 1+ Cells	0		Stain 2 1+ Cells	0		Stain 2 1+ Cells	0		Stain 2 1+ Cells	0		Stain 2 1+ Cells	0		Stain 2 1+ Cells	0		Stain 2 1+ Cells	0
	Stain 2 2+ Cells	0		Stain 2 2+ Cells	0		Stain 2 2+ Cells	0		Stain 2 2+ Cells	0		Stain 2 2+ Cells	0		Stain 2 2+ Cells	0		Stain 2 2+ Cells	0		Stain 2 2+ Cells	0
	Stain 2 3+ Cells	0		Stain 2 3+ Cells	0		Stain 2 3+ Cells	0		Stain 2 3+ Cells	0		Stain 2 3+ Cells	0		Stain 2 3+ Cells	0		Stain 2 3+ Cells	0		Stain 2 3+ Cells	0
	Dual Positive Cells	0		Dual Positive Cells	0		Dual Positive Cells	0		Dual Positive Cells	0		Dual Positive Cells	0		Dual Positive Cells	0		Dual Positive Cells	0		Dual Positive Cells	0
	Dual Negative Cells	4664		Dual Negative Cells	4318		Dual Negative Cells	3226		Dual Negative Cells	3020		Dual Negative Cells	3867		Dual Negative Cells	3989		Dual Negative Cells	3030		Dual Negative Cells	3177
	% Stain 1 Positive Cells	4.66067		% Stain 1 Positive Cells	1.77434		% Stain 1 Positive Cells	3.58637		% Stain 1 Positive Cells	1.11329		% Stain 1 Positive Cells	5.15085		% Stain 1 Positive Cells	1.26238		% Stain 1 Positive Cells	0.915631		% Stain 1 Positive Cells	1.36604		2.4787
	% Stain 1 0+ Cells	95.3393		% Stain 1 0+ Cells	98.2257		% Stain 1 0+ Cells	96.4136		% Stain 1 0+ Cells	98.8867		% Stain 1 0+ Cells	94.8492		% Stain 1 0+ Cells	98.7376		% Stain 1 0+ Cells	99.0844		% Stain 1 0+ Cells	98.634
	% Stain 1 1+ Cells	1.22649		% Stain 1 1+ Cells	0.250227		% Stain 1 1+ Cells	0.717274		% Stain 1 1+ Cells	0.425671		% Stain 1 1+ Cells	1.34903		% Stain 1 1+ Cells	0.346535		% Stain 1 1+ Cells	0.0654022		% Stain 1 1+ Cells	0.434648
	% Stain 1 2+ Cells	2.10548		% Stain 1 2+ Cells	0.818926		% Stain 1 2+ Cells	1.7633		% Stain 1 2+ Cells	0.458415		% Stain 1 2+ Cells	2.03581		% Stain 1 2+ Cells	0.470297		% Stain 1 2+ Cells	0.523218		% Stain 1 2+ Cells	0.372555
	% Stain 1 3+ Cells	1.3287		% Stain 1 3+ Cells	0.705187		% Stain 1 3+ Cells	1.1058		% Stain 1 3+ Cells	0.229208		% Stain 1 3+ Cells	1.766		% Stain 1 3+ Cells	0.445545		% Stain 1 3+ Cells	0.327011		% Stain 1 3+ Cells	0.558833
	Stain 1 H-Score	9.42355		Stain 1 H-Score	4.00364		Stain 1 H-Score	7.56127		Stain 1 H-Score	2.03012		Stain 1 H-Score	10.7187		Stain 1 H-Score	2.62376		Stain 1 H-Score	2.09287		Stain 1 H-Score	2.85626
	% Stain 2 Positive Cells	0		% Stain 2 Positive Cells	0		% Stain 2 Positive Cells	0		% Stain 2 Positive Cells	0		% Stain 2 Positive Cells	0		% Stain 2 Positive Cells	0		% Stain 2 Positive Cells	0		% Stain 2 Positive Cells	0
	% Stain 2 0+ Cells	100		% Stain 2 0+ Cells	100		% Stain 2 0+ Cells	100		% Stain 2 0+ Cells	100		% Stain 2 0+ Cells	100		% Stain 2 0+ Cells	100		% Stain 2 0+ Cells	100		% Stain 2 0+ Cells	100
	% Stain 2 1+ Cells	0		% Stain 2 1+ Cells	0		% Stain 2 1+ Cells	0		% Stain 2 1+ Cells	0		% Stain 2 1+ Cells	0		% Stain 2 1+ Cells	0		% Stain 2 1+ Cells	0		% Stain 2 1+ Cells	0
	% Stain 2 2+ Cells	0		% Stain 2 2+ Cells	0		% Stain 2 2+ Cells	0		% Stain 2 2+ Cells	0		% Stain 2 2+ Cells	0		% Stain 2 2+ Cells	0		% Stain 2 2+ Cells	0		% Stain 2 2+ Cells	0
	% Stain 2 3+ Cells	0		% Stain 2 3+ Cells	0		% Stain 2 3+ Cells	0		% Stain 2 3+ Cells	0		% Stain 2 3+ Cells	0		% Stain 2 3+ Cells	0		% Stain 2 3+ Cells	0		% Stain 2 3+ Cells	0
	Stain 2 H-Score	0		Stain 2 H-Score	0		Stain 2 H-Score	0		Stain 2 H-Score	0		Stain 2 H-Score	0		Stain 2 H-Score	0		Stain 2 H-Score	0		Stain 2 H-Score	0
	% Dual Positive Cells	0		% Dual Positive Cells	0		% Dual Positive Cells	0		% Dual Positive Cells	0		% Dual Positive Cells	0		% Dual Positive Cells	0		% Dual Positive Cells	0		% Dual Positive Cells	0
	% Dual Negative Cells	95.3393		% Dual Negative Cells	98.2257		% Dual Negative Cells	96.4136		% Dual Negative Cells	98.8867		% Dual Negative Cells	94.8492		% Dual Negative Cells	98.7376		% Dual Negative Cells	99.0844		% Dual Negative Cells	98.634
	Avg Stain 1 Nuclear OD	0.0644193		Avg Stain 1 Nuclear OD	0.0568716		Avg Stain 1 Nuclear OD	0.0691924		Avg Stain 1 Nuclear OD	0.0557974		Avg Stain 1 Nuclear OD	0.0729423		Avg Stain 1 Nuclear OD	0.0558757		Avg Stain 1 Nuclear OD	0.057474		Avg Stain 1 Nuclear OD	0.0544375
	Avg Stain 2 Nuclear OD	0.0332665		Avg Stain 2 Nuclear OD	0.0322539		Avg Stain 2 Nuclear OD	0.0323373		Avg Stain 2 Nuclear OD	0.0318822		Avg Stain 2 Nuclear OD	0.0334574		Avg Stain 2 Nuclear OD	0.0319677		Avg Stain 2 Nuclear OD	0.0318874		Avg Stain 2 Nuclear OD	0.0317435
	Avg Stain 1 Cytoplasmic OD	0.0430169		Avg Stain 1 Cytoplasmic OD	0.0484123		Avg Stain 1 Cytoplasmic OD	0.0534747		Avg Stain 1 Cytoplasmic OD	0.050902		Avg Stain 1 Cytoplasmic OD	0.0486093		Avg Stain 1 Cytoplasmic OD	0.0483332		Avg Stain 1 Cytoplasmic OD	0.0507192		Avg Stain 1 Cytoplasmic OD	0.0471506
	Avg Stain 2 Cytoplasmic OD	0.0310165		Avg Stain 2 Cytoplasmic OD	0.0307716		Avg Stain 2 Cytoplasmic OD	0.0306804		Avg Stain 2 Cytoplasmic OD	0.0306549		Avg Stain 2 Cytoplasmic OD	0.0309351		Avg Stain 2 Cytoplasmic OD	0.0306454		Avg Stain 2 Cytoplasmic OD	0.0306958		Avg Stain 2 Cytoplasmic OD	0.0305589
	Avg Cell Area (µm²)	103.116		Avg Cell Area (µm²)	114.505		Avg Cell Area (µm²)	115.518		Avg Cell Area (µm²)	118.542		Avg Cell Area (µm²)	108.145		Avg Cell Area (µm²)	115.754		Avg Cell Area (µm²)	116.237		Avg Cell Area (µm²)	115.703
	Avg Cytoplasm Area (µm²)	80.7216		Avg Cytoplasm Area (µm²)	91.6518		Avg Cytoplasm Area (µm²)	92.4781		Avg Cytoplasm Area (µm²)	97.4934		Avg Cytoplasm Area (µm²)	84.7709		Avg Cytoplasm Area (µm²)	93.2076		Avg Cytoplasm Area (µm²)	92.4235		Avg Cytoplasm Area (µm²)	90.5919
	Avg Nucleus Area (µm²)	22.3944		Avg Nucleus Area (µm²)	22.8535		Avg Nucleus Area (µm²)	23.0404		Avg Nucleus Area (µm²)	21.0483		Avg Nucleus Area (µm²)	23.3737		Avg Nucleus Area (µm²)	22.5464		Avg Nucleus Area (µm²)	23.8135		Avg Nucleus Area (µm²)	25.1108
	Avg Nucleus Perimeter (µm)	19.4549		Avg Nucleus Perimeter (µm)	19.4062		Avg Nucleus Perimeter (µm)	19.6028		Avg Nucleus Perimeter (µm)	18.6598		Avg Nucleus Perimeter (µm)	19.6854		Avg Nucleus Perimeter (µm)	19.4043		Avg Nucleus Perimeter (µm)	19.8268		Avg Nucleus Perimeter (µm)	20.4999
	Avg Nucleus Roundness	0.689404		Avg Nucleus Roundness	0.708933		Avg Nucleus Roundness	0.711632		Avg Nucleus Roundness	0.719132		Avg Nucleus Roundness	0.69878		Avg Nucleus Roundness	0.711829		Avg Nucleus Roundness	0.710826		Avg Nucleus Roundness	0.706518
	Tissue Area (µm²)	654822		Tissue Area (µm²)	626247		Tissue Area (µm²)	482874		Tissue Area (µm²)	452446		Tissue Area (µm²)	553775		Tissue Area (µm²)	589134		Tissue Area (µm²)	436869		Tissue Area (µm²)	461550
	BSNA71.1d	wt
	Name	Value		Name	Value		Name	Value		Name	Value		Name	Value		Name	Value		Name	Value		Name	Value
	Total Cells	4241		Total Cells	3025		Total Cells	3968		Total Cells	3076		Total Cells	2813		Total Cells	4780		Total Cells	4315		Total Cells	3495
	Stain 1 Positive Cells	206		Stain 1 Positive Cells	25		Stain 1 Positive Cells	87		Stain 1 Positive Cells	51		Stain 1 Positive Cells	42		Stain 1 Positive Cells	132		Stain 1 Positive Cells	113		Stain 1 Positive Cells	164
	Stain 1 0+ Cells	4035		Stain 1 0+ Cells	3000		Stain 1 0+ Cells	3881		Stain 1 0+ Cells	3025		Stain 1 0+ Cells	2771		Stain 1 0+ Cells	4648		Stain 1 0+ Cells	4202		Stain 1 0+ Cells	3331
	Stain 1 1+ Cells	54		Stain 1 1+ Cells	12		Stain 1 1+ Cells	18		Stain 1 1+ Cells	24		Stain 1 1+ Cells	24		Stain 1 1+ Cells	40		Stain 1 1+ Cells	47		Stain 1 1+ Cells	69
	Stain 1 2+ Cells	102		Stain 1 2+ Cells	8		Stain 1 2+ Cells	47		Stain 1 2+ Cells	22		Stain 1 2+ Cells	15		Stain 1 2+ Cells	70		Stain 1 2+ Cells	43		Stain 1 2+ Cells	69
	Stain 1 3+ Cells	50		Stain 1 3+ Cells	5		Stain 1 3+ Cells	22		Stain 1 3+ Cells	5		Stain 1 3+ Cells	3		Stain 1 3+ Cells	22		Stain 1 3+ Cells	23		Stain 1 3+ Cells	26
	Stain 2 Positive Cells	0		Stain 2 Positive Cells	0		Stain 2 Positive Cells	0		Stain 2 Positive Cells	0		Stain 2 Positive Cells	0		Stain 2 Positive Cells	0		Stain 2 Positive Cells	0		Stain 2 Positive Cells	0
	Stain 2 0+ Cells	4241		Stain 2 0+ Cells	3025		Stain 2 0+ Cells	3968		Stain 2 0+ Cells	3076		Stain 2 0+ Cells	2813		Stain 2 0+ Cells	4780		Stain 2 0+ Cells	4315		Stain 2 0+ Cells	3495
	Stain 2 1+ Cells	0		Stain 2 1+ Cells	0		Stain 2 1+ Cells	0		Stain 2 1+ Cells	0		Stain 2 1+ Cells	0		Stain 2 1+ Cells	0		Stain 2 1+ Cells	0		Stain 2 1+ Cells	0
	Stain 2 2+ Cells	0		Stain 2 2+ Cells	0		Stain 2 2+ Cells	0		Stain 2 2+ Cells	0		Stain 2 2+ Cells	0		Stain 2 2+ Cells	0		Stain 2 2+ Cells	0		Stain 2 2+ Cells	0
	Stain 2 3+ Cells	0		Stain 2 3+ Cells	0		Stain 2 3+ Cells	0		Stain 2 3+ Cells	0		Stain 2 3+ Cells	0		Stain 2 3+ Cells	0		Stain 2 3+ Cells	0		Stain 2 3+ Cells	0
	Dual Positive Cells	0		Dual Positive Cells	0		Dual Positive Cells	0		Dual Positive Cells	0		Dual Positive Cells	0		Dual Positive Cells	0		Dual Positive Cells	0		Dual Positive Cells	0
	Dual Negative Cells	4035		Dual Negative Cells	3000		Dual Negative Cells	3881		Dual Negative Cells	3025		Dual Negative Cells	2771		Dual Negative Cells	4648		Dual Negative Cells	4202		Dual Negative Cells	3331
	% Stain 1 Positive Cells	4.85734		% Stain 1 Positive Cells	0.826446		% Stain 1 Positive Cells	2.19254		% Stain 1 Positive Cells	1.658		% Stain 1 Positive Cells	1.49307		% Stain 1 Positive Cells	2.76151		% Stain 1 Positive Cells	2.61877		% Stain 1 Positive Cells	4.69242		2.63751
	% Stain 1 0+ Cells	95.1427		% Stain 1 0+ Cells	99.1736		% Stain 1 0+ Cells	97.8075		% Stain 1 0+ Cells	98.342		% Stain 1 0+ Cells	98.5069		% Stain 1 0+ Cells	97.2385		% Stain 1 0+ Cells	97.3812		% Stain 1 0+ Cells	95.3076
	% Stain 1 1+ Cells	1.27328		% Stain 1 1+ Cells	0.396694		% Stain 1 1+ Cells	0.453629		% Stain 1 1+ Cells	0.780234		% Stain 1 1+ Cells	0.853182		% Stain 1 1+ Cells	0.83682		% Stain 1 1+ Cells	1.08922		% Stain 1 1+ Cells	1.97425
	% Stain 1 2+ Cells	2.40509		% Stain 1 2+ Cells	0.264463		% Stain 1 2+ Cells	1.18448		% Stain 1 2+ Cells	0.715215		% Stain 1 2+ Cells	0.533239		% Stain 1 2+ Cells	1.46444		% Stain 1 2+ Cells	0.996524		% Stain 1 2+ Cells	1.97425
	% Stain 1 3+ Cells	1.17897		% Stain 1 3+ Cells	0.165289		% Stain 1 3+ Cells	0.554435		% Stain 1 3+ Cells	0.162549		% Stain 1 3+ Cells	0.106648		% Stain 1 3+ Cells	0.460251		% Stain 1 3+ Cells	0.533024		% Stain 1 3+ Cells	0.74392
	Stain 1 H-Score	9.62037		Stain 1 H-Score	1.42149		Stain 1 H-Score	4.48589		Stain 1 H-Score	2.69831		Stain 1 H-Score	2.2396		Stain 1 H-Score	5.14644		Stain 1 H-Score	4.68134		Stain 1 H-Score	8.15451
	% Stain 2 Positive Cells	0		% Stain 2 Positive Cells	0		% Stain 2 Positive Cells	0		% Stain 2 Positive Cells	0		% Stain 2 Positive Cells	0		% Stain 2 Positive Cells	0		% Stain 2 Positive Cells	0		% Stain 2 Positive Cells	0
	% Stain 2 0+ Cells	100		% Stain 2 0+ Cells	100		% Stain 2 0+ Cells	100		% Stain 2 0+ Cells	100		% Stain 2 0+ Cells	100		% Stain 2 0+ Cells	100		% Stain 2 0+ Cells	100		% Stain 2 0+ Cells	100
	% Stain 2 1+ Cells	0		% Stain 2 1+ Cells	0		% Stain 2 1+ Cells	0		% Stain 2 1+ Cells	0		% Stain 2 1+ Cells	0		% Stain 2 1+ Cells	0		% Stain 2 1+ Cells	0		% Stain 2 1+ Cells	0
	% Stain 2 2+ Cells	0		% Stain 2 2+ Cells	0		% Stain 2 2+ Cells	0		% Stain 2 2+ Cells	0		% Stain 2 2+ Cells	0		% Stain 2 2+ Cells	0		% Stain 2 2+ Cells	0		% Stain 2 2+ Cells	0
	% Stain 2 3+ Cells	0		% Stain 2 3+ Cells	0		% Stain 2 3+ Cells	0		% Stain 2 3+ Cells	0		% Stain 2 3+ Cells	0		% Stain 2 3+ Cells	0		% Stain 2 3+ Cells	0		% Stain 2 3+ Cells	0
	Stain 2 H-Score	0		Stain 2 H-Score	0		Stain 2 H-Score	0		Stain 2 H-Score	0		Stain 2 H-Score	0		Stain 2 H-Score	0		Stain 2 H-Score	0		Stain 2 H-Score	0
	% Dual Positive Cells	0		% Dual Positive Cells	0		% Dual Positive Cells	0		% Dual Positive Cells	0		% Dual Positive Cells	0		% Dual Positive Cells	0		% Dual Positive Cells	0		% Dual Positive Cells	0
	% Dual Negative Cells	95.1427		% Dual Negative Cells	99.1736		% Dual Negative Cells	97.8075		% Dual Negative Cells	98.342		% Dual Negative Cells	98.5069		% Dual Negative Cells	97.2385		% Dual Negative Cells	97.3812		% Dual Negative Cells	95.3076
	Avg Stain 1 Nuclear OD	0.0619991		Avg Stain 1 Nuclear OD	0.0449278		Avg Stain 1 Nuclear OD	0.0501703		Avg Stain 1 Nuclear OD	0.0505721		Avg Stain 1 Nuclear OD	0.052164		Avg Stain 1 Nuclear OD	0.0544472		Avg Stain 1 Nuclear OD	0.0534418		Avg Stain 1 Nuclear OD	0.0629045
	Avg Stain 2 Nuclear OD	0.0335008		Avg Stain 2 Nuclear OD	0.0328545		Avg Stain 2 Nuclear OD	0.0328596		Avg Stain 2 Nuclear OD	0.0332713		Avg Stain 2 Nuclear OD	0.0331938		Avg Stain 2 Nuclear OD	0.0331635		Avg Stain 2 Nuclear OD	0.033153		Avg Stain 2 Nuclear OD	0.0340542
	Avg Stain 1 Cytoplasmic OD	0.0412206		Avg Stain 1 Cytoplasmic OD	0.0435954		Avg Stain 1 Cytoplasmic OD	0.0447805		Avg Stain 1 Cytoplasmic OD	0.0485966		Avg Stain 1 Cytoplasmic OD	0.0444138		Avg Stain 1 Cytoplasmic OD	0.0471168		Avg Stain 1 Cytoplasmic OD	0.04519		Avg Stain 1 Cytoplasmic OD	0.0450157
	Avg Stain 2 Cytoplasmic OD	0.0311894		Avg Stain 2 Cytoplasmic OD	0.0311537		Avg Stain 2 Cytoplasmic OD	0.0311644		Avg Stain 2 Cytoplasmic OD	0.0314408		Avg Stain 2 Cytoplasmic OD	0.0314788		Avg Stain 2 Cytoplasmic OD	0.0314088		Avg Stain 2 Cytoplasmic OD	0.0313858		Avg Stain 2 Cytoplasmic OD	0.0314176
	Avg Cell Area (µm²)	93.8644		Avg Cell Area (µm²)	105.431		Avg Cell Area (µm²)	96.132		Avg Cell Area (µm²)	104.736		Avg Cell Area (µm²)	95.7777		Avg Cell Area (µm²)	95.5421		Avg Cell Area (µm²)	83.7681		Avg Cell Area (µm²)	96.0791
	Avg Cytoplasm Area (µm²)	70.9969		Avg Cytoplasm Area (µm²)	79.0417		Avg Cytoplasm Area (µm²)	71.0992		Avg Cytoplasm Area (µm²)	79.4666		Avg Cytoplasm Area (µm²)	71.3589		Avg Cytoplasm Area (µm²)	69.1932		Avg Cytoplasm Area (µm²)	60.8515		Avg Cytoplasm Area (µm²)	73.2343
	Avg Nucleus Area (µm²)	22.8675		Avg Nucleus Area (µm²)	26.3889		Avg Nucleus Area (µm²)	25.0327		Avg Nucleus Area (µm²)	25.2698		Avg Nucleus Area (µm²)	24.4188		Avg Nucleus Area (µm²)	26.3489		Avg Nucleus Area (µm²)	22.9165		Avg Nucleus Area (µm²)	22.8448
	Avg Nucleus Perimeter (µm)	19.7018		Avg Nucleus Perimeter (µm)	21.1475		Avg Nucleus Perimeter (µm)	20.5922		Avg Nucleus Perimeter (µm)	20.6521		Avg Nucleus Perimeter (µm)	20.2589		Avg Nucleus Perimeter (µm)	21.1573		Avg Nucleus Perimeter (µm)	19.7106		Avg Nucleus Perimeter (µm)	19.5456
	Avg Nucleus Roundness	0.687761		Avg Nucleus Roundness	0.699596		Avg Nucleus Roundness	0.697205		Avg Nucleus Roundness	0.696693		Avg Nucleus Roundness	0.68878		Avg Nucleus Roundness	0.690387		Avg Nucleus Roundness	0.687411		Avg Nucleus Roundness	0.692581
	Tissue Area (µm²)	485699		Tissue Area (µm²)	387554		Tissue Area (µm²)	465627		Tissue Area (µm²)	400856		Tissue Area (µm²)	340455		Tissue Area (µm²)	564170		Tissue Area (µm²)	438218		Tissue Area (µm²)	430427
	BSNA69.3a	HOM
	Name	Value		Name	Value		Name	Value		Name	Value		Name	Value		Name	Value		Name	Value		Name	Value
	Total Cells	3357		Total Cells	4154		Total Cells	4442		Total Cells	5069		Total Cells	3107		Total Cells	3309		Total Cells	10270		Total Cells	7147
	Stain 1 Positive Cells	370		Stain 1 Positive Cells	450		Stain 1 Positive Cells	271		Stain 1 Positive Cells	434		Stain 1 Positive Cells	240		Stain 1 Positive Cells	463		Stain 1 Positive Cells	1092		Stain 1 Positive Cells	1188
	Stain 1 0+ Cells	2987		Stain 1 0+ Cells	3704		Stain 1 0+ Cells	4171		Stain 1 0+ Cells	4635		Stain 1 0+ Cells	2867		Stain 1 0+ Cells	2846		Stain 1 0+ Cells	9178		Stain 1 0+ Cells	5959
	Stain 1 1+ Cells	96		Stain 1 1+ Cells	118		Stain 1 1+ Cells	66		Stain 1 1+ Cells	126		Stain 1 1+ Cells	71		Stain 1 1+ Cells	110		Stain 1 1+ Cells	266		Stain 1 1+ Cells	308
	Stain 1 2+ Cells	156		Stain 1 2+ Cells	196		Stain 1 2+ Cells	144		Stain 1 2+ Cells	218		Stain 1 2+ Cells	96		Stain 1 2+ Cells	214		Stain 1 2+ Cells	498		Stain 1 2+ Cells	617
	Stain 1 3+ Cells	118		Stain 1 3+ Cells	136		Stain 1 3+ Cells	61		Stain 1 3+ Cells	90		Stain 1 3+ Cells	73		Stain 1 3+ Cells	139		Stain 1 3+ Cells	328		Stain 1 3+ Cells	263
	Stain 2 Positive Cells	0		Stain 2 Positive Cells	0		Stain 2 Positive Cells	0		Stain 2 Positive Cells	0		Stain 2 Positive Cells	0		Stain 2 Positive Cells	0		Stain 2 Positive Cells	0		Stain 2 Positive Cells	0
	Stain 2 0+ Cells	3357		Stain 2 0+ Cells	4154		Stain 2 0+ Cells	4442		Stain 2 0+ Cells	5069		Stain 2 0+ Cells	3107		Stain 2 0+ Cells	3309		Stain 2 0+ Cells	10270		Stain 2 0+ Cells	7147
	Stain 2 1+ Cells	0		Stain 2 1+ Cells	0		Stain 2 1+ Cells	0		Stain 2 1+ Cells	0		Stain 2 1+ Cells	0		Stain 2 1+ Cells	0		Stain 2 1+ Cells	0		Stain 2 1+ Cells	0
	Stain 2 2+ Cells	0		Stain 2 2+ Cells	0		Stain 2 2+ Cells	0		Stain 2 2+ Cells	0		Stain 2 2+ Cells	0		Stain 2 2+ Cells	0		Stain 2 2+ Cells	0		Stain 2 2+ Cells	0
	Stain 2 3+ Cells	0		Stain 2 3+ Cells	0		Stain 2 3+ Cells	0		Stain 2 3+ Cells	0		Stain 2 3+ Cells	0		Stain 2 3+ Cells	0		Stain 2 3+ Cells	0		Stain 2 3+ Cells	0
	Dual Positive Cells	0		Dual Positive Cells	0		Dual Positive Cells	0		Dual Positive Cells	0		Dual Positive Cells	0		Dual Positive Cells	0		Dual Positive Cells	0		Dual Positive Cells	0
	Dual Negative Cells	2987		Dual Negative Cells	3704		Dual Negative Cells	4171		Dual Negative Cells	4635		Dual Negative Cells	2867		Dual Negative Cells	2846		Dual Negative Cells	9178		Dual Negative Cells	5959
	% Stain 1 Positive Cells	11.0217		% Stain 1 Positive Cells	10.8329		% Stain 1 Positive Cells	6.10086		% Stain 1 Positive Cells	8.56185		% Stain 1 Positive Cells	7.72449		% Stain 1 Positive Cells	13.9921		% Stain 1 Positive Cells	10.6329		% Stain 1 Positive Cells	16.6224		10.6861
	% Stain 1 0+ Cells	88.9783		% Stain 1 0+ Cells	89.1671		% Stain 1 0+ Cells	93.8991		% Stain 1 0+ Cells	91.4382		% Stain 1 0+ Cells	92.2755		% Stain 1 0+ Cells	86.0079		% Stain 1 0+ Cells	89.3671		% Stain 1 0+ Cells	83.3776
	% Stain 1 1+ Cells	2.8597		% Stain 1 1+ Cells	2.84064		% Stain 1 1+ Cells	1.48582		% Stain 1 1+ Cells	2.4857		% Stain 1 1+ Cells	2.28516		% Stain 1 1+ Cells	3.32427		% Stain 1 1+ Cells	2.59007		% Stain 1 1+ Cells	4.3095
	% Stain 1 2+ Cells	4.64701		% Stain 1 2+ Cells	4.71834		% Stain 1 2+ Cells	3.24178		% Stain 1 2+ Cells	4.30065		% Stain 1 2+ Cells	3.0898		% Stain 1 2+ Cells	6.46721		% Stain 1 2+ Cells	4.84907		% Stain 1 2+ Cells	8.63299
	% Stain 1 3+ Cells	3.51504		% Stain 1 3+ Cells	3.27395		% Stain 1 3+ Cells	1.37326		% Stain 1 3+ Cells	1.7755		% Stain 1 3+ Cells	2.34953		% Stain 1 3+ Cells	4.20066		% Stain 1 3+ Cells	3.19377		% Stain 1 3+ Cells	3.67987
	Stain 1 H-Score	22.6988		Stain 1 H-Score	22.0992		Stain 1 H-Score	12.0891		Stain 1 H-Score	16.4135		Stain 1 H-Score	15.5134		Stain 1 H-Score	28.8607		Stain 1 H-Score	21.8695		Stain 1 H-Score	32.6151
	% Stain 2 Positive Cells	0		% Stain 2 Positive Cells	0		% Stain 2 Positive Cells	0		% Stain 2 Positive Cells	0		% Stain 2 Positive Cells	0		% Stain 2 Positive Cells	0		% Stain 2 Positive Cells	0		% Stain 2 Positive Cells	0
	% Stain 2 0+ Cells	100		% Stain 2 0+ Cells	100		% Stain 2 0+ Cells	100		% Stain 2 0+ Cells	100		% Stain 2 0+ Cells	100		% Stain 2 0+ Cells	100		% Stain 2 0+ Cells	100		% Stain 2 0+ Cells	100
	% Stain 2 1+ Cells	0		% Stain 2 1+ Cells	0		% Stain 2 1+ Cells	0		% Stain 2 1+ Cells	0		% Stain 2 1+ Cells	0		% Stain 2 1+ Cells	0		% Stain 2 1+ Cells	0		% Stain 2 1+ Cells	0
	% Stain 2 2+ Cells	0		% Stain 2 2+ Cells	0		% Stain 2 2+ Cells	0		% Stain 2 2+ Cells	0		% Stain 2 2+ Cells	0		% Stain 2 2+ Cells	0		% Stain 2 2+ Cells	0		% Stain 2 2+ Cells	0
	% Stain 2 3+ Cells	0		% Stain 2 3+ Cells	0		% Stain 2 3+ Cells	0		% Stain 2 3+ Cells	0		% Stain 2 3+ Cells	0		% Stain 2 3+ Cells	0		% Stain 2 3+ Cells	0		% Stain 2 3+ Cells	0
	Stain 2 H-Score	0		Stain 2 H-Score	0		Stain 2 H-Score	0		Stain 2 H-Score	0		Stain 2 H-Score	0		Stain 2 H-Score	0		Stain 2 H-Score	0		Stain 2 H-Score	0
	% Dual Positive Cells	0		% Dual Positive Cells	0		% Dual Positive Cells	0		% Dual Positive Cells	0		% Dual Positive Cells	0		% Dual Positive Cells	0		% Dual Positive Cells	0		% Dual Positive Cells	0
	% Dual Negative Cells	88.9783		% Dual Negative Cells	89.1671		% Dual Negative Cells	93.8991		% Dual Negative Cells	91.4382		% Dual Negative Cells	92.2755		% Dual Negative Cells	86.0079		% Dual Negative Cells	89.3671		% Dual Negative Cells	83.3776
	Avg Stain 1 Nuclear OD	0.0851327		Avg Stain 1 Nuclear OD	0.0870265		Avg Stain 1 Nuclear OD	0.0668083		Avg Stain 1 Nuclear OD	0.0756287		Avg Stain 1 Nuclear OD	0.0757334		Avg Stain 1 Nuclear OD	0.103137		Avg Stain 1 Nuclear OD	0.0884242		Avg Stain 1 Nuclear OD	0.106896
	Avg Stain 2 Nuclear OD	0.0347073		Avg Stain 2 Nuclear OD	0.0347395		Avg Stain 2 Nuclear OD	0.0341009		Avg Stain 2 Nuclear OD	0.0343181		Avg Stain 2 Nuclear OD	0.0349002		Avg Stain 2 Nuclear OD	0.0351065		Avg Stain 2 Nuclear OD	0.0350241		Avg Stain 2 Nuclear OD	0.0347299
	Avg Stain 1 Cytoplasmic OD	0.0422615		Avg Stain 1 Cytoplasmic OD	0.0480482		Avg Stain 1 Cytoplasmic OD	0.0453152		Avg Stain 1 Cytoplasmic OD	0.0522466		Avg Stain 1 Cytoplasmic OD	0.046144		Avg Stain 1 Cytoplasmic OD	0.0539481		Avg Stain 1 Cytoplasmic OD	0.0489949		Avg Stain 1 Cytoplasmic OD	0.0573258
	Avg Stain 2 Cytoplasmic OD	0.0313538		Avg Stain 2 Cytoplasmic OD	0.0315465		Avg Stain 2 Cytoplasmic OD	0.0315182		Avg Stain 2 Cytoplasmic OD	0.0317733		Avg Stain 2 Cytoplasmic OD	0.0316539		Avg Stain 2 Cytoplasmic OD	0.031679		Avg Stain 2 Cytoplasmic OD	0.0314461		Avg Stain 2 Cytoplasmic OD	0.031618
	Avg Cell Area (µm²)	101.633		Avg Cell Area (µm²)	94.2276		Avg Cell Area (µm²)	91.2406		Avg Cell Area (µm²)	82.8345		Avg Cell Area (µm²)	100.096		Avg Cell Area (µm²)	97.4635		Avg Cell Area (µm²)	95.0412		Avg Cell Area (µm²)	85.0372
	Avg Cytoplasm Area (µm²)	75.7095		Avg Cytoplasm Area (µm²)	68.0907		Avg Cytoplasm Area (µm²)	66.0027		Avg Cytoplasm Area (µm²)	56.7962		Avg Cytoplasm Area (µm²)	73.5487		Avg Cytoplasm Area (µm²)	71.651		Avg Cytoplasm Area (µm²)	69.5837		Avg Cytoplasm Area (µm²)	59.5354
	Avg Nucleus Area (µm²)	25.924		Avg Nucleus Area (µm²)	26.1368		Avg Nucleus Area (µm²)	25.2379		Avg Nucleus Area (µm²)	26.0383		Avg Nucleus Area (µm²)	26.5472		Avg Nucleus Area (µm²)	25.8124		Avg Nucleus Area (µm²)	25.4575		Avg Nucleus Area (µm²)	25.5018
	Avg Nucleus Perimeter (µm)	21.1529		Avg Nucleus Perimeter (µm)	21.1028		Avg Nucleus Perimeter (µm)	20.8599		Avg Nucleus Perimeter (µm)	21.1194		Avg Nucleus Perimeter (µm)	21.5304		Avg Nucleus Perimeter (µm)	20.9164		Avg Nucleus Perimeter (µm)	20.8258		Avg Nucleus Perimeter (µm)	20.9868
	Avg Nucleus Roundness	0.689945		Avg Nucleus Roundness	0.687859		Avg Nucleus Roundness	0.684774		Avg Nucleus Roundness	0.68479		Avg Nucleus Roundness	0.691424		Avg Nucleus Roundness	0.697479		Avg Nucleus Roundness	0.688252		Avg Nucleus Roundness	0.687884
	Tissue Area (µm²)	415638		Tissue Area (µm²)	477040		Tissue Area (µm²)	502931		Tissue Area (µm²)	515212		Tissue Area (µm²)	387525		Tissue Area (µm²)	397563		Tissue Area (µm²)	1199760		Tissue Area (µm²)	732274
	BSNA80.1g	wt
	Name	Value		Name	Value		Name	Value		Name	Value		Name	Value		Name	Value		Name	Value		Name	Value
	Total Cells	5443		Total Cells	3905		Total Cells	4014		Total Cells	3422		Total Cells	3050		Total Cells	4211		Total Cells	3603		Total Cells	4342
	Stain 1 Positive Cells	0		Stain 1 Positive Cells	17		Stain 1 Positive Cells	35		Stain 1 Positive Cells	6		Stain 1 Positive Cells	23		Stain 1 Positive Cells	34		Stain 1 Positive Cells	40		Stain 1 Positive Cells	38
	Stain 1 0+ Cells	5443		Stain 1 0+ Cells	3888		Stain 1 0+ Cells	3979		Stain 1 0+ Cells	3416		Stain 1 0+ Cells	3027		Stain 1 0+ Cells	4177		Stain 1 0+ Cells	3563		Stain 1 0+ Cells	4304
	Stain 1 1+ Cells	0		Stain 1 1+ Cells	16		Stain 1 1+ Cells	35		Stain 1 1+ Cells	6		Stain 1 1+ Cells	19		Stain 1 1+ Cells	34		Stain 1 1+ Cells	37		Stain 1 1+ Cells	33
	Stain 1 2+ Cells	0		Stain 1 2+ Cells	1		Stain 1 2+ Cells	0		Stain 1 2+ Cells	0		Stain 1 2+ Cells	3		Stain 1 2+ Cells	0		Stain 1 2+ Cells	3		Stain 1 2+ Cells	5
	Stain 1 3+ Cells	0		Stain 1 3+ Cells	0		Stain 1 3+ Cells	0		Stain 1 3+ Cells	0		Stain 1 3+ Cells	1		Stain 1 3+ Cells	0		Stain 1 3+ Cells	0		Stain 1 3+ Cells	0
	Stain 2 Positive Cells	0		Stain 2 Positive Cells	0		Stain 2 Positive Cells	0		Stain 2 Positive Cells	0		Stain 2 Positive Cells	0		Stain 2 Positive Cells	0		Stain 2 Positive Cells	0		Stain 2 Positive Cells	0
	Stain 2 0+ Cells	5443		Stain 2 0+ Cells	3905		Stain 2 0+ Cells	4014		Stain 2 0+ Cells	3422		Stain 2 0+ Cells	3050		Stain 2 0+ Cells	4211		Stain 2 0+ Cells	3603		Stain 2 0+ Cells	4342
	Stain 2 1+ Cells	0		Stain 2 1+ Cells	0		Stain 2 1+ Cells	0		Stain 2 1+ Cells	0		Stain 2 1+ Cells	0		Stain 2 1+ Cells	0		Stain 2 1+ Cells	0		Stain 2 1+ Cells	0
	Stain 2 2+ Cells	0		Stain 2 2+ Cells	0		Stain 2 2+ Cells	0		Stain 2 2+ Cells	0		Stain 2 2+ Cells	0		Stain 2 2+ Cells	0		Stain 2 2+ Cells	0		Stain 2 2+ Cells	0
	Stain 2 3+ Cells	0		Stain 2 3+ Cells	0		Stain 2 3+ Cells	0		Stain 2 3+ Cells	0		Stain 2 3+ Cells	0		Stain 2 3+ Cells	0		Stain 2 3+ Cells	0		Stain 2 3+ Cells	0
	Dual Positive Cells	0		Dual Positive Cells	0		Dual Positive Cells	0		Dual Positive Cells	0		Dual Positive Cells	0		Dual Positive Cells	0		Dual Positive Cells	0		Dual Positive Cells	0
	Dual Negative Cells	5443		Dual Negative Cells	3888		Dual Negative Cells	3979		Dual Negative Cells	3416		Dual Negative Cells	3027		Dual Negative Cells	4177		Dual Negative Cells	3563		Dual Negative Cells	4304
	% Stain 1 Positive Cells	0		% Stain 1 Positive Cells	0.435339		% Stain 1 Positive Cells	0.871948		% Stain 1 Positive Cells	0.175336		% Stain 1 Positive Cells	0.754098		% Stain 1 Positive Cells	0.807409		% Stain 1 Positive Cells	1.11019		% Stain 1 Positive Cells	0.875173		0.628687
	% Stain 1 0+ Cells	100		% Stain 1 0+ Cells	99.5647		% Stain 1 0+ Cells	99.1281		% Stain 1 0+ Cells	99.8247		% Stain 1 0+ Cells	99.2459		% Stain 1 0+ Cells	99.1926		% Stain 1 0+ Cells	98.8898		% Stain 1 0+ Cells	99.1248
	% Stain 1 1+ Cells	0		% Stain 1 1+ Cells	0.409731		% Stain 1 1+ Cells	0.871948		% Stain 1 1+ Cells	0.175336		% Stain 1 1+ Cells	0.622951		% Stain 1 1+ Cells	0.807409		% Stain 1 1+ Cells	1.02692		% Stain 1 1+ Cells	0.760018
	% Stain 1 2+ Cells	0		% Stain 1 2+ Cells	0.0256082		% Stain 1 2+ Cells	0		% Stain 1 2+ Cells	0		% Stain 1 2+ Cells	0.0983607		% Stain 1 2+ Cells	0		% Stain 1 2+ Cells	0.0832639		% Stain 1 2+ Cells	0.115154
	% Stain 1 3+ Cells	0		% Stain 1 3+ Cells	0		% Stain 1 3+ Cells	0		% Stain 1 3+ Cells	0		% Stain 1 3+ Cells	0.0327869		% Stain 1 3+ Cells	0		% Stain 1 3+ Cells	0		% Stain 1 3+ Cells	0
	Stain 1 H-Score	0		Stain 1 H-Score	0.460948		Stain 1 H-Score	0.871948		Stain 1 H-Score	0.175336		Stain 1 H-Score	0.918033		Stain 1 H-Score	0.807409		Stain 1 H-Score	1.19345		Stain 1 H-Score	0.990327
	% Stain 2 Positive Cells	0		% Stain 2 Positive Cells	0		% Stain 2 Positive Cells	0		% Stain 2 Positive Cells	0		% Stain 2 Positive Cells	0		% Stain 2 Positive Cells	0		% Stain 2 Positive Cells	0		% Stain 2 Positive Cells	0
	% Stain 2 0+ Cells	100		% Stain 2 0+ Cells	100		% Stain 2 0+ Cells	100		% Stain 2 0+ Cells	100		% Stain 2 0+ Cells	100		% Stain 2 0+ Cells	100		% Stain 2 0+ Cells	100		% Stain 2 0+ Cells	100
	% Stain 2 1+ Cells	0		% Stain 2 1+ Cells	0		% Stain 2 1+ Cells	0		% Stain 2 1+ Cells	0		% Stain 2 1+ Cells	0		% Stain 2 1+ Cells	0		% Stain 2 1+ Cells	0		% Stain 2 1+ Cells	0
	% Stain 2 2+ Cells	0		% Stain 2 2+ Cells	0		% Stain 2 2+ Cells	0		% Stain 2 2+ Cells	0		% Stain 2 2+ Cells	0		% Stain 2 2+ Cells	0		% Stain 2 2+ Cells	0		% Stain 2 2+ Cells	0
	% Stain 2 3+ Cells	0		% Stain 2 3+ Cells	0		% Stain 2 3+ Cells	0		% Stain 2 3+ Cells	0		% Stain 2 3+ Cells	0		% Stain 2 3+ Cells	0		% Stain 2 3+ Cells	0		% Stain 2 3+ Cells	0
	Stain 2 H-Score	0		Stain 2 H-Score	0		Stain 2 H-Score	0		Stain 2 H-Score	0		Stain 2 H-Score	0		Stain 2 H-Score	0		Stain 2 H-Score	0		Stain 2 H-Score	0
	% Dual Positive Cells	0		% Dual Positive Cells	0		% Dual Positive Cells	0		% Dual Positive Cells	0		% Dual Positive Cells	0		% Dual Positive Cells	0		% Dual Positive Cells	0		% Dual Positive Cells	0
	% Dual Negative Cells	100		% Dual Negative Cells	99.5647		% Dual Negative Cells	99.1281		% Dual Negative Cells	99.8247		% Dual Negative Cells	99.2459		% Dual Negative Cells	99.1926		% Dual Negative Cells	98.8898		% Dual Negative Cells	99.1248
	Avg Stain 1 Nuclear OD	0.0469878		Avg Stain 1 Nuclear OD	0.0491673		Avg Stain 1 Nuclear OD	0.0501071		Avg Stain 1 Nuclear OD	0.0493171		Avg Stain 1 Nuclear OD	0.0489976		Avg Stain 1 Nuclear OD	0.0505242		Avg Stain 1 Nuclear OD	0.0526054		Avg Stain 1 Nuclear OD	0.0534777
	Avg Stain 2 Nuclear OD	0.0328102		Avg Stain 2 Nuclear OD	0.0328233		Avg Stain 2 Nuclear OD	0.0327459		Avg Stain 2 Nuclear OD	0.0331709		Avg Stain 2 Nuclear OD	0.0328969		Avg Stain 2 Nuclear OD	0.0332628		Avg Stain 2 Nuclear OD	0.0331877		Avg Stain 2 Nuclear OD	0.033282
	Avg Stain 1 Cytoplasmic OD	0.042444		Avg Stain 1 Cytoplasmic OD	0.0441773		Avg Stain 1 Cytoplasmic OD	0.0442808		Avg Stain 1 Cytoplasmic OD	0.0451215		Avg Stain 1 Cytoplasmic OD	0.0456775		Avg Stain 1 Cytoplasmic OD	0.0442902		Avg Stain 1 Cytoplasmic OD	0.0456631		Avg Stain 1 Cytoplasmic OD	0.0481406
	Avg Stain 2 Cytoplasmic OD	0.0309315		Avg Stain 2 Cytoplasmic OD	0.0309646		Avg Stain 2 Cytoplasmic OD	0.0308781		Avg Stain 2 Cytoplasmic OD	0.0311058		Avg Stain 2 Cytoplasmic OD	0.031		Avg Stain 2 Cytoplasmic OD	0.0310881		Avg Stain 2 Cytoplasmic OD	0.031022		Avg Stain 2 Cytoplasmic OD	0.0311296
	Avg Cell Area (µm²)	103.923		Avg Cell Area (µm²)	106.17		Avg Cell Area (µm²)	115.709		Avg Cell Area (µm²)	102.178		Avg Cell Area (µm²)	104.037		Avg Cell Area (µm²)	102.768		Avg Cell Area (µm²)	106.656		Avg Cell Area (µm²)	95.835
	Avg Cytoplasm Area (µm²)	78.8445		Avg Cytoplasm Area (µm²)	80.9847		Avg Cytoplasm Area (µm²)	90.0942		Avg Cytoplasm Area (µm²)	78.8128		Avg Cytoplasm Area (µm²)	79.862		Avg Cytoplasm Area (µm²)	77.9995		Avg Cytoplasm Area (µm²)	83.4355		Avg Cytoplasm Area (µm²)	71.9816
	Avg Nucleus Area (µm²)	25.0785		Avg Nucleus Area (µm²)	25.1851		Avg Nucleus Area (µm²)	25.6144		Avg Nucleus Area (µm²)	23.3653		Avg Nucleus Area (µm²)	24.1749		Avg Nucleus Area (µm²)	24.7684		Avg Nucleus Area (µm²)	23.2205		Avg Nucleus Area (µm²)	23.8534
	Avg Nucleus Perimeter (µm)	20.5627		Avg Nucleus Perimeter (µm)	20.6346		Avg Nucleus Perimeter (µm)	20.892		Avg Nucleus Perimeter (µm)	20.1172		Avg Nucleus Perimeter (µm)	20.3771		Avg Nucleus Perimeter (µm)	20.4986		Avg Nucleus Perimeter (µm)	19.6004		Avg Nucleus Perimeter (µm)	20.1588
	Avg Nucleus Roundness	0.694419		Avg Nucleus Roundness	0.692782		Avg Nucleus Roundness	0.694309		Avg Nucleus Roundness	0.697992		Avg Nucleus Roundness	0.696356		Avg Nucleus Roundness	0.695165		Avg Nucleus Roundness	0.699408		Avg Nucleus Roundness	0.68843
	Tissue Area (µm²)	687018		Tissue Area (µm²)	509108		Tissue Area (µm²)	580394		Tissue Area (µm²)	432485		Tissue Area (µm²)	413705		Tissue Area (µm²)	550499		Tissue Area (µm²)	471684		Tissue Area (µm²)	524880
	BSNA80.1f	HOM
	Name	Value		Name	Value		Name	Value		Name	Value		Name	Value		Name	Value		Name	Value		Name	Value
	Total Cells	3811		Total Cells	3255		Total Cells	3793		Total Cells	3445		Total Cells	3392		Total Cells	4381		Total Cells	3436		Total Cells	5756
	Stain 1 Positive Cells	141		Stain 1 Positive Cells	98		Stain 1 Positive Cells	166		Stain 1 Positive Cells	180		Stain 1 Positive Cells	213		Stain 1 Positive Cells	376		Stain 1 Positive Cells	111		Stain 1 Positive Cells	426
	Stain 1 0+ Cells	3670		Stain 1 0+ Cells	3157		Stain 1 0+ Cells	3627		Stain 1 0+ Cells	3265		Stain 1 0+ Cells	3179		Stain 1 0+ Cells	4005		Stain 1 0+ Cells	3325		Stain 1 0+ Cells	5330
	Stain 1 1+ Cells	52		Stain 1 1+ Cells	33		Stain 1 1+ Cells	67		Stain 1 1+ Cells	64		Stain 1 1+ Cells	96		Stain 1 1+ Cells	155		Stain 1 1+ Cells	44		Stain 1 1+ Cells	194
	Stain 1 2+ Cells	40		Stain 1 2+ Cells	30		Stain 1 2+ Cells	50		Stain 1 2+ Cells	45		Stain 1 2+ Cells	59		Stain 1 2+ Cells	82		Stain 1 2+ Cells	36		Stain 1 2+ Cells	84
	Stain 1 3+ Cells	49		Stain 1 3+ Cells	35		Stain 1 3+ Cells	49		Stain 1 3+ Cells	71		Stain 1 3+ Cells	58		Stain 1 3+ Cells	139		Stain 1 3+ Cells	31		Stain 1 3+ Cells	148
	Stain 2 Positive Cells	0		Stain 2 Positive Cells	0		Stain 2 Positive Cells	0		Stain 2 Positive Cells	0		Stain 2 Positive Cells	0		Stain 2 Positive Cells	0		Stain 2 Positive Cells	0		Stain 2 Positive Cells	0
	Stain 2 0+ Cells	3811		Stain 2 0+ Cells	3255		Stain 2 0+ Cells	3793		Stain 2 0+ Cells	3445		Stain 2 0+ Cells	3392		Stain 2 0+ Cells	4381		Stain 2 0+ Cells	3436		Stain 2 0+ Cells	5756
	Stain 2 1+ Cells	0		Stain 2 1+ Cells	0		Stain 2 1+ Cells	0		Stain 2 1+ Cells	0		Stain 2 1+ Cells	0		Stain 2 1+ Cells	0		Stain 2 1+ Cells	0		Stain 2 1+ Cells	0
	Stain 2 2+ Cells	0		Stain 2 2+ Cells	0		Stain 2 2+ Cells	0		Stain 2 2+ Cells	0		Stain 2 2+ Cells	0		Stain 2 2+ Cells	0		Stain 2 2+ Cells	0		Stain 2 2+ Cells	0
	Stain 2 3+ Cells	0		Stain 2 3+ Cells	0		Stain 2 3+ Cells	0		Stain 2 3+ Cells	0		Stain 2 3+ Cells	0		Stain 2 3+ Cells	0		Stain 2 3+ Cells	0		Stain 2 3+ Cells	0
	Dual Positive Cells	0		Dual Positive Cells	0		Dual Positive Cells	0		Dual Positive Cells	0		Dual Positive Cells	0		Dual Positive Cells	0		Dual Positive Cells	0		Dual Positive Cells	0
	Dual Negative Cells	3670		Dual Negative Cells	3157		Dual Negative Cells	3627		Dual Negative Cells	3265		Dual Negative Cells	3179		Dual Negative Cells	4005		Dual Negative Cells	3325		Dual Negative Cells	5330
	% Stain 1 Positive Cells	3.69982		% Stain 1 Positive Cells	3.01075		% Stain 1 Positive Cells	4.37648		% Stain 1 Positive Cells	5.22496		% Stain 1 Positive Cells	6.27948		% Stain 1 Positive Cells	8.58252		% Stain 1 Positive Cells	3.2305		% Stain 1 Positive Cells	7.40097		5.22569
	% Stain 1 0+ Cells	96.3002		% Stain 1 0+ Cells	96.9892		% Stain 1 0+ Cells	95.6235		% Stain 1 0+ Cells	94.775		% Stain 1 0+ Cells	93.7205		% Stain 1 0+ Cells	91.4175		% Stain 1 0+ Cells	96.7695		% Stain 1 0+ Cells	92.599
	% Stain 1 1+ Cells	1.36447		% Stain 1 1+ Cells	1.01382		% Stain 1 1+ Cells	1.76641		% Stain 1 1+ Cells	1.85776		% Stain 1 1+ Cells	2.83019		% Stain 1 1+ Cells	3.53801		% Stain 1 1+ Cells	1.28056		% Stain 1 1+ Cells	3.3704
	% Stain 1 2+ Cells	1.04959		% Stain 1 2+ Cells	0.921659		% Stain 1 2+ Cells	1.31822		% Stain 1 2+ Cells	1.30624		% Stain 1 2+ Cells	1.73939		% Stain 1 2+ Cells	1.87172		% Stain 1 2+ Cells	1.04773		% Stain 1 2+ Cells	1.45935
	% Stain 1 3+ Cells	1.28575		% Stain 1 3+ Cells	1.07527		% Stain 1 3+ Cells	1.29185		% Stain 1 3+ Cells	2.06096		% Stain 1 3+ Cells	1.70991		% Stain 1 3+ Cells	3.17279		% Stain 1 3+ Cells	0.902212		% Stain 1 3+ Cells	2.57123
	Stain 1 H-Score	7.32091		Stain 1 H-Score	6.08295		Stain 1 H-Score	8.27841		Stain 1 H-Score	10.6531		Stain 1 H-Score	11.4387		Stain 1 H-Score	16.7998		Stain 1 H-Score	6.08265		Stain 1 H-Score	14.0028
	% Stain 2 Positive Cells	0		% Stain 2 Positive Cells	0		% Stain 2 Positive Cells	0		% Stain 2 Positive Cells	0		% Stain 2 Positive Cells	0		% Stain 2 Positive Cells	0		% Stain 2 Positive Cells	0		% Stain 2 Positive Cells	0
	% Stain 2 0+ Cells	100		% Stain 2 0+ Cells	100		% Stain 2 0+ Cells	100		% Stain 2 0+ Cells	100		% Stain 2 0+ Cells	100		% Stain 2 0+ Cells	100		% Stain 2 0+ Cells	100		% Stain 2 0+ Cells	100
	% Stain 2 1+ Cells	0		% Stain 2 1+ Cells	0		% Stain 2 1+ Cells	0		% Stain 2 1+ Cells	0		% Stain 2 1+ Cells	0		% Stain 2 1+ Cells	0		% Stain 2 1+ Cells	0		% Stain 2 1+ Cells	0
	% Stain 2 2+ Cells	0		% Stain 2 2+ Cells	0		% Stain 2 2+ Cells	0		% Stain 2 2+ Cells	0		% Stain 2 2+ Cells	0		% Stain 2 2+ Cells	0		% Stain 2 2+ Cells	0		% Stain 2 2+ Cells	0
	% Stain 2 3+ Cells	0		% Stain 2 3+ Cells	0		% Stain 2 3+ Cells	0		% Stain 2 3+ Cells	0		% Stain 2 3+ Cells	0		% Stain 2 3+ Cells	0		% Stain 2 3+ Cells	0		% Stain 2 3+ Cells	0
	Stain 2 H-Score	0		Stain 2 H-Score	0		Stain 2 H-Score	0		Stain 2 H-Score	0		Stain 2 H-Score	0		Stain 2 H-Score	0		Stain 2 H-Score	0		Stain 2 H-Score	0
	% Dual Positive Cells	0		% Dual Positive Cells	0		% Dual Positive Cells	0		% Dual Positive Cells	0		% Dual Positive Cells	0		% Dual Positive Cells	0		% Dual Positive Cells	0		% Dual Positive Cells	0
	% Dual Negative Cells	96.3002		% Dual Negative Cells	96.9892		% Dual Negative Cells	95.6235		% Dual Negative Cells	94.775		% Dual Negative Cells	93.7205		% Dual Negative Cells	91.4175		% Dual Negative Cells	96.7695		% Dual Negative Cells	92.599
	Avg Stain 1 Nuclear OD	0.0640494		Avg Stain 1 Nuclear OD	0.0640502		Avg Stain 1 Nuclear OD	0.0698237		Avg Stain 1 Nuclear OD	0.073951		Avg Stain 1 Nuclear OD	0.0738728		Avg Stain 1 Nuclear OD	0.089667		Avg Stain 1 Nuclear OD	0.0629629		Avg Stain 1 Nuclear OD	0.0870421
	Avg Stain 2 Nuclear OD	0.033867		Avg Stain 2 Nuclear OD	0.0336234		Avg Stain 2 Nuclear OD	0.0338663		Avg Stain 2 Nuclear OD	0.0342653		Avg Stain 2 Nuclear OD	0.0337569		Avg Stain 2 Nuclear OD	0.0344966		Avg Stain 2 Nuclear OD	0.0334517		Avg Stain 2 Nuclear OD	0.0350816
	Avg Stain 1 Cytoplasmic OD	0.0481008		Avg Stain 1 Cytoplasmic OD	0.05166		Avg Stain 1 Cytoplasmic OD	0.0543075		Avg Stain 1 Cytoplasmic OD	0.0530497		Avg Stain 1 Cytoplasmic OD	0.0519759		Avg Stain 1 Cytoplasmic OD	0.0578186		Avg Stain 1 Cytoplasmic OD	0.0521934		Avg Stain 1 Cytoplasmic OD	0.0588872
	Avg Stain 2 Cytoplasmic OD	0.0311784		Avg Stain 2 Cytoplasmic OD	0.0312259		Avg Stain 2 Cytoplasmic OD	0.0312146		Avg Stain 2 Cytoplasmic OD	0.0312545		Avg Stain 2 Cytoplasmic OD	0.031211		Avg Stain 2 Cytoplasmic OD	0.0313542		Avg Stain 2 Cytoplasmic OD	0.031299		Avg Stain 2 Cytoplasmic OD	0.0314671
	Avg Cell Area (µm²)	97.3939		Avg Cell Area (µm²)	99.1257		Avg Cell Area (µm²)	101.685		Avg Cell Area (µm²)	102.47		Avg Cell Area (µm²)	103.49		Avg Cell Area (µm²)	99.6186		Avg Cell Area (µm²)	95.9565		Avg Cell Area (µm²)	100.045
	Avg Cytoplasm Area (µm²)	72.4198		Avg Cytoplasm Area (µm²)	74.2227		Avg Cytoplasm Area (µm²)	76.7913		Avg Cytoplasm Area (µm²)	77.4118		Avg Cytoplasm Area (µm²)	78.5758		Avg Cytoplasm Area (µm²)	73.6601		Avg Cytoplasm Area (µm²)	71.5414		Avg Cytoplasm Area (µm²)	74.141
	Avg Nucleus Area (µm²)	24.9741		Avg Nucleus Area (µm²)	24.9029		Avg Nucleus Area (µm²)	24.894		Avg Nucleus Area (µm²)	25.0584		Avg Nucleus Area (µm²)	24.9138		Avg Nucleus Area (µm²)	25.9585		Avg Nucleus Area (µm²)	24.4151		Avg Nucleus Area (µm²)	25.9042
	Avg Nucleus Perimeter (µm)	20.6615		Avg Nucleus Perimeter (µm)	20.758		Avg Nucleus Perimeter (µm)	20.6734		Avg Nucleus Perimeter (µm)	20.6801		Avg Nucleus Perimeter (µm)	20.6099		Avg Nucleus Perimeter (µm)	21.0599		Avg Nucleus Perimeter (µm)	20.4202		Avg Nucleus Perimeter (µm)	21.0056
	Avg Nucleus Roundness	0.696571		Avg Nucleus Roundness	0.69535		Avg Nucleus Roundness	0.69702		Avg Nucleus Roundness	0.695009		Avg Nucleus Roundness	0.695566		Avg Nucleus Roundness	0.691529		Avg Nucleus Roundness	0.696845		Avg Nucleus Roundness	0.696331
	Tissue Area (µm²)	452385		Tissue Area (µm²)	401532		Tissue Area (µm²)	470242		Tissue Area (µm²)	446947		Tissue Area (µm²)	428276		Tissue Area (µm²)	532122		Tissue Area (µm²)	400479		Tissue Area (µm²)	707929
	BSNA84.3c	WT
	Name	Value		Name	Value		Name	Value		Name	Value		Name	Value		Name	Value		Name	Value		Name	Value
	Total Cells	3721		Total Cells	2744		Total Cells	4742		Total Cells	2827		Total Cells	3138		Total Cells	3019		Total Cells	3495		Total Cells	2843
	Stain 1 Positive Cells	166		Stain 1 Positive Cells	91		Stain 1 Positive Cells	293		Stain 1 Positive Cells	73		Stain 1 Positive Cells	100		Stain 1 Positive Cells	108		Stain 1 Positive Cells	382		Stain 1 Positive Cells	61
	Stain 1 0+ Cells	3555		Stain 1 0+ Cells	2653		Stain 1 0+ Cells	4449		Stain 1 0+ Cells	2754		Stain 1 0+ Cells	3038		Stain 1 0+ Cells	2911		Stain 1 0+ Cells	3113		Stain 1 0+ Cells	2782
	Stain 1 1+ Cells	57		Stain 1 1+ Cells	28		Stain 1 1+ Cells	94		Stain 1 1+ Cells	18		Stain 1 1+ Cells	30		Stain 1 1+ Cells	35		Stain 1 1+ Cells	97		Stain 1 1+ Cells	24
	Stain 1 2+ Cells	92		Stain 1 2+ Cells	46		Stain 1 2+ Cells	135		Stain 1 2+ Cells	26		Stain 1 2+ Cells	41		Stain 1 2+ Cells	36		Stain 1 2+ Cells	211		Stain 1 2+ Cells	27
	Stain 1 3+ Cells	17		Stain 1 3+ Cells	17		Stain 1 3+ Cells	64		Stain 1 3+ Cells	29		Stain 1 3+ Cells	29		Stain 1 3+ Cells	37		Stain 1 3+ Cells	74		Stain 1 3+ Cells	10
	Stain 2 Positive Cells	0		Stain 2 Positive Cells	0		Stain 2 Positive Cells	0		Stain 2 Positive Cells	0		Stain 2 Positive Cells	0		Stain 2 Positive Cells	0		Stain 2 Positive Cells	0		Stain 2 Positive Cells	0
	Stain 2 0+ Cells	3721		Stain 2 0+ Cells	2744		Stain 2 0+ Cells	4742		Stain 2 0+ Cells	2827		Stain 2 0+ Cells	3138		Stain 2 0+ Cells	3019		Stain 2 0+ Cells	3495		Stain 2 0+ Cells	2843
	Stain 2 1+ Cells	0		Stain 2 1+ Cells	0		Stain 2 1+ Cells	0		Stain 2 1+ Cells	0		Stain 2 1+ Cells	0		Stain 2 1+ Cells	0		Stain 2 1+ Cells	0		Stain 2 1+ Cells	0
	Stain 2 2+ Cells	0		Stain 2 2+ Cells	0		Stain 2 2+ Cells	0		Stain 2 2+ Cells	0		Stain 2 2+ Cells	0		Stain 2 2+ Cells	0		Stain 2 2+ Cells	0		Stain 2 2+ Cells	0
	Stain 2 3+ Cells	0		Stain 2 3+ Cells	0		Stain 2 3+ Cells	0		Stain 2 3+ Cells	0		Stain 2 3+ Cells	0		Stain 2 3+ Cells	0		Stain 2 3+ Cells	0		Stain 2 3+ Cells	0
	Dual Positive Cells	0		Dual Positive Cells	0		Dual Positive Cells	0		Dual Positive Cells	0		Dual Positive Cells	0		Dual Positive Cells	0		Dual Positive Cells	0		Dual Positive Cells	0
	Dual Negative Cells	3555		Dual Negative Cells	2653		Dual Negative Cells	4449		Dual Negative Cells	2754		Dual Negative Cells	3038		Dual Negative Cells	2911		Dual Negative Cells	3113		Dual Negative Cells	2782
	% Stain 1 Positive Cells	4.46117		% Stain 1 Positive Cells	3.31633		% Stain 1 Positive Cells	6.17883		% Stain 1 Positive Cells	2.58224		% Stain 1 Positive Cells	3.18674		% Stain 1 Positive Cells	3.57734		% Stain 1 Positive Cells	10.9299		% Stain 1 Positive Cells	2.14562		4.54727
	% Stain 1 0+ Cells	95.5388		% Stain 1 0+ Cells	96.6837		% Stain 1 0+ Cells	93.8212		% Stain 1 0+ Cells	97.4178		% Stain 1 0+ Cells	96.8133		% Stain 1 0+ Cells	96.4227		% Stain 1 0+ Cells	89.0701		% Stain 1 0+ Cells	97.8544
	% Stain 1 1+ Cells	1.53185		% Stain 1 1+ Cells	1.02041		% Stain 1 1+ Cells	1.98229		% Stain 1 1+ Cells	0.636717		% Stain 1 1+ Cells	0.956023		% Stain 1 1+ Cells	1.15932		% Stain 1 1+ Cells	2.77539		% Stain 1 1+ Cells	0.844179
	% Stain 1 2+ Cells	2.47245		% Stain 1 2+ Cells	1.67638		% Stain 1 2+ Cells	2.8469		% Stain 1 2+ Cells	0.919703		% Stain 1 2+ Cells	1.30656		% Stain 1 2+ Cells	1.19245		% Stain 1 2+ Cells	6.0372		% Stain 1 2+ Cells	0.949701
	% Stain 1 3+ Cells	0.456866		% Stain 1 3+ Cells	0.619534		% Stain 1 3+ Cells	1.34964		% Stain 1 3+ Cells	1.02582		% Stain 1 3+ Cells	0.924156		% Stain 1 3+ Cells	1.22557		% Stain 1 3+ Cells	2.11731		% Stain 1 3+ Cells	0.351741
	Stain 1 H-Score	7.84735		Stain 1 H-Score	6.23178		Stain 1 H-Score	11.725		Stain 1 H-Score	5.55359		Stain 1 H-Score	6.34162		Stain 1 H-Score	7.22093		Stain 1 H-Score	21.2017		Stain 1 H-Score	3.7988
	% Stain 2 Positive Cells	0		% Stain 2 Positive Cells	0		% Stain 2 Positive Cells	0		% Stain 2 Positive Cells	0		% Stain 2 Positive Cells	0		% Stain 2 Positive Cells	0		% Stain 2 Positive Cells	0		% Stain 2 Positive Cells	0
	% Stain 2 0+ Cells	100		% Stain 2 0+ Cells	100		% Stain 2 0+ Cells	100		% Stain 2 0+ Cells	100		% Stain 2 0+ Cells	100		% Stain 2 0+ Cells	100		% Stain 2 0+ Cells	100		% Stain 2 0+ Cells	100
	% Stain 2 1+ Cells	0		% Stain 2 1+ Cells	0		% Stain 2 1+ Cells	0		% Stain 2 1+ Cells	0		% Stain 2 1+ Cells	0		% Stain 2 1+ Cells	0		% Stain 2 1+ Cells	0		% Stain 2 1+ Cells	0
	% Stain 2 2+ Cells	0		% Stain 2 2+ Cells	0		% Stain 2 2+ Cells	0		% Stain 2 2+ Cells	0		% Stain 2 2+ Cells	0		% Stain 2 2+ Cells	0		% Stain 2 2+ Cells	0		% Stain 2 2+ Cells	0
	% Stain 2 3+ Cells	0		% Stain 2 3+ Cells	0		% Stain 2 3+ Cells	0		% Stain 2 3+ Cells	0		% Stain 2 3+ Cells	0		% Stain 2 3+ Cells	0		% Stain 2 3+ Cells	0		% Stain 2 3+ Cells	0
	Stain 2 H-Score	0		Stain 2 H-Score	0		Stain 2 H-Score	0		Stain 2 H-Score	0		Stain 2 H-Score	0		Stain 2 H-Score	0		Stain 2 H-Score	0		Stain 2 H-Score	0
	% Dual Positive Cells	0		% Dual Positive Cells	0		% Dual Positive Cells	0		% Dual Positive Cells	0		% Dual Positive Cells	0		% Dual Positive Cells	0		% Dual Positive Cells	0		% Dual Positive Cells	0
	% Dual Negative Cells	95.5388		% Dual Negative Cells	96.6837		% Dual Negative Cells	93.8212		% Dual Negative Cells	97.4178		% Dual Negative Cells	96.8133		% Dual Negative Cells	96.4227		% Dual Negative Cells	89.0701		% Dual Negative Cells	97.8544
	Avg Stain 1 Nuclear OD	0.0540937		Avg Stain 1 Nuclear OD	0.0497894		Avg Stain 1 Nuclear OD	0.0612741		Avg Stain 1 Nuclear OD	0.0489527		Avg Stain 1 Nuclear OD	0.0505337		Avg Stain 1 Nuclear OD	0.0530779		Avg Stain 1 Nuclear OD	0.0813475		Avg Stain 1 Nuclear OD	0.0462965
	Avg Stain 2 Nuclear OD	0.0329383		Avg Stain 2 Nuclear OD	0.032814		Avg Stain 2 Nuclear OD	0.0328452		Avg Stain 2 Nuclear OD	0.0321353		Avg Stain 2 Nuclear OD	0.0320685		Avg Stain 2 Nuclear OD	0.0323123		Avg Stain 2 Nuclear OD	0.0341219		Avg Stain 2 Nuclear OD	0.0323873
	Avg Stain 1 Cytoplasmic OD	0.0364953		Avg Stain 1 Cytoplasmic OD	0.0345618		Avg Stain 1 Cytoplasmic OD	0.0372623		Avg Stain 1 Cytoplasmic OD	0.03603		Avg Stain 1 Cytoplasmic OD	0.0380464		Avg Stain 1 Cytoplasmic OD	0.0389926		Avg Stain 1 Cytoplasmic OD	0.040414		Avg Stain 1 Cytoplasmic OD	0.0347867
	Avg Stain 2 Cytoplasmic OD	0.0312265		Avg Stain 2 Cytoplasmic OD	0.0314169		Avg Stain 2 Cytoplasmic OD	0.0308419		Avg Stain 2 Cytoplasmic OD	0.0308735		Avg Stain 2 Cytoplasmic OD	0.0304773		Avg Stain 2 Cytoplasmic OD	0.0306885		Avg Stain 2 Cytoplasmic OD	0.0308098		Avg Stain 2 Cytoplasmic OD	0.0309912
	Avg Cell Area (µm²)	120.023		Avg Cell Area (µm²)	146.91		Avg Cell Area (µm²)	108.591		Avg Cell Area (µm²)	125.554		Avg Cell Area (µm²)	133.464		Avg Cell Area (µm²)	123.696		Avg Cell Area (µm²)	123.484		Avg Cell Area (µm²)	110.832
	Avg Cytoplasm Area (µm²)	96.6722		Avg Cytoplasm Area (µm²)	121.322		Avg Cytoplasm Area (µm²)	86.12		Avg Cytoplasm Area (µm²)	102.473		Avg Cytoplasm Area (µm²)	108.628		Avg Cytoplasm Area (µm²)	100.324		Avg Cytoplasm Area (µm²)	100.253		Avg Cytoplasm Area (µm²)	89.1906
	Avg Nucleus Area (µm²)	23.3511		Avg Nucleus Area (µm²)	25.5877		Avg Nucleus Area (µm²)	22.4706		Avg Nucleus Area (µm²)	23.0812		Avg Nucleus Area (µm²)	24.8361		Avg Nucleus Area (µm²)	23.3713		Avg Nucleus Area (µm²)	23.2303		Avg Nucleus Area (µm²)	21.6416
	Avg Nucleus Perimeter (µm)	19.6492		Avg Nucleus Perimeter (µm)	20.3946		Avg Nucleus Perimeter (µm)	19.4094		Avg Nucleus Perimeter (µm)	19.4412		Avg Nucleus Perimeter (µm)	20.0969		Avg Nucleus Perimeter (µm)	19.7181		Avg Nucleus Perimeter (µm)	19.5814		Avg Nucleus Perimeter (µm)	19.09
	Avg Nucleus Roundness	0.709791		Avg Nucleus Roundness	0.735015		Avg Nucleus Roundness	0.696542		Avg Nucleus Roundness	0.717988		Avg Nucleus Roundness	0.726036		Avg Nucleus Roundness	0.713877		Avg Nucleus Roundness	0.708379		Avg Nucleus Roundness	0.695086
	Tissue Area (µm²)	633337		Tissue Area (µm²)	633705		Tissue Area (µm²)	663197		Tissue Area (µm²)	473747		Tissue Area (µm²)	567944		Tissue Area (µm²)	493759		Tissue Area (µm²)	575705		Tissue Area (µm²)	426841
