# Supplementary material for: CYRI-B-mediated macropinocytosis drives metastasis via lysophosphatidic acid receptor uptake
Source: eLife journal article supplement (doi:10.7554/elife.83712), 2024-05-07
Supplement: fig3-data6 [file Figure 3- source data 6 Excel 3J.xlsx]

## Sheet: Sheet1
Pancreas and mouse weight calculations
			6 weeks
			Pancreas	Mouse mass		Pancreas body ratio
	wt	BSNA66.1j	0.26	17.51		0.0148487
		BSNA87.1b	0.182	21.78		0.00835629
		BSNA87.1e	0.194	22.05		0.00879819
		BSNA87.1g	0.167	23.29		0.00717046
		BSNA87.1k	0.177	17.9		0.00988827
	HOM	BSNA84.3d	0.152	16.29		0.00933088
		BSNA84.3e	0.143	16.89		0.00846655
		BSNA67.1a	0.39	22.18		0.0175834
		BSNA66.1g	0.3	14.7		0.0204082
		BSNA66.1i	0.25	17.41		0.0143596
			10 weeks
	wt	BSNA77.1c	0.36	20.78		0.0173244
		BSNA77.2c	0.244	27.317		0.00893217
		BSNA84.1e	0.394	25.207		0.0156306
		BSNA81.1e	0.44	24.111		0.0182489
		BSNA88.1b	0.3	23.4		0.0128205
		BSNA88.1h	0.25	23		0.0108696
	hom	BSNA63.3a	0.366	18.98		0.0192835
		BSNA68.2a	0.54	28.61		0.0188745
		BSNA69.3c	0.45	20		0.0225
		BSNA80.1a	0.4	22.78		0.0175593
			15 weeks
	wt	BSNA47.1a	0.46	27.4		0.0167883
		BSNA54.1d	0.61	24.09		0.0253217
		BSNA53.2a	0.34	28.76		0.011822
		BSNA71.1d	0.39	24.26		0.0160758
		BSNA80.1g	0.513	23.629		0.0217106
		BSNA84.3c	0.4	26.5		0.0150943
		BSNA87.2d	0.4	29.2		0.0136986
	HOM	BSNA64.1e	0.54	23.76		0.0227273
		BSNA60.2h	1.248	24.68		0.0505673
		BSNA70.2c	0.9	25.2		0.0357143
		BSNA69.3a	0.56	25.9		0.0216216
		BSNA80.1f	0.479	25.343		0.0189007
		BSNA64.1f	0.52	22.9		0.0227074
		BSNA90.2e	2.62	26.1		0.100383
