# Supplementary material for: CYRI-B-mediated macropinocytosis drives metastasis via lysophosphatidic acid receptor uptake
Source: eLife journal article supplement (doi:10.7554/elife.83712), 2024-05-07
Supplement: fig3-figsupp1-data1 [file Figure 3- figure supplement 1- source data 1 Excel.xlsx]

## Sheet: Sheet1
	BSNA80.1a	HOM				BSNA84.1e	WT
						Normal	67
	Normal	35				PanIN1	11
	PanIN1	16				PaniN2	23
	PaniN2	10				PanIN3	8
	PanIN3	3
		64					42
	BSNA68.2a	HOM				BSNA81.1e	wt
	Normal	39				Normal	52
	PanIN1	22				PanIN1	17
	PaniN2	8				PaniN2	52
	PanIN3	6				PanIN3	17
		75					138
		wt
	BSNA77.1c					BSNA77.2c	wt
	Normal	26				Normal	40
	PanIN1	13				PanIN1	18
	PaniN2	4				PaniN2	4
	PanIN3	5				PanIN3	4
		48					66
	BSNA63.3a	HOM				BSNA89.1e	HOM
	Normal	39				Normal	39
	PanIN1	17				PanIN1	13
	PaniN2	16				PaniN2	7
	PanIN3	2				PanIN3	4
		74					63
						BSNA69.3c	HOM
	BSNA88.1h	WT
						Normal	48
	Normal	43				PanIN1	30
	PanIN1	15				PaniN2	38
	PaniN2	65				PanIN3	9
	PanIN3	14
							125
		137
	BSNA88.1b	WT
	Normal	67
	PanIN1	6
	PaniN2	24
	PanIN3	5
		102
