# Supplementary material for: CYRI-B-mediated macropinocytosis drives metastasis via lysophosphatidic acid receptor uptake
Source: eLife journal article supplement (doi:10.7554/elife.83712), 2024-05-07
Supplement: fig4-data1 [file Figure 4- source data 1 Excel 4CEFGH.xlsx]

## Sheet: Sheet1
BSNB colony
IP injection of KPC cells (1,000,000) CYRI-B WT and KO to check for any changes in mets
					Symptoms
			Weight at end point (g)	Weight of pancreas (g)	Number of Mets under the skin	Number of mets in IP cavity (Mesentery/intestine)	Diaphragm	Ascitis	Jauntice	Liver		Pancreas/Body ratio		Percentage for ascitis	Percentage of mice with jauntice		Ki67 counted
		Mouse ID
	Control KPC cells	BSNB2.1a	22.63	0.33	1	6 (2 taken)	0	Y (a bit)	N	N		0.0145824		60	60
		BSNB2.1b	19.16	0.26	1	9 (2-3 taken)	0	N	Y	N		0.0135699					yes
		BSNB2.1c
		BSNB2.1d	24.1	0.15	1	1	0	N	N	N		0.00622407
		BSNB2.1e	24.3	0.4	2	5	0	Y (a bit)	Y	N		0.0164609					yes
		BSNB2.1k	19.76	0.3	2	7	3	Y (a bit)	Y	Y (1 met)		0.0151822					yes
	CYRI-B KPC cells	BSNB2.1f	21.8	0.2	1	1	1	N	N	N		0.00917431		0	50		yes
		BSNB2.1g	25	0.31	1	3	0	N	Y	N		0.0124					yes
		BSNB2.1h	25.81	0.34	1	2	0	N	Y	N		0.0131732					yes
		BSNB2.1i	21.81	0.29	1	3	0	N	Y	N		0.0132967					yes
		BSNB2.1j	24.2	0.3	1	0	0	N	N	N		0.0123967
		BSNB2.1l	26.5	0.34	1	3	0	N	N	N		0.0128302					yes
