# Supplementary material for: CYRI-B-mediated macropinocytosis drives metastasis via lysophosphatidic acid receptor uptake
Source: eLife journal article supplement (doi:10.7554/elife.83712), 2024-05-07
Supplement: fig4-data2 [file Figure 4- source data 2 Excel 4J.xlsx]

## Sheet: Sheet1
	Repeat 1
								Mean cos(theta)		Mean directness
		cos(theta)	speed	distance	directness
	MTrackJ: Points GFP4 initial.csv	0.0135928	23.9597	5.98992	0.237378			0.0163853		0.222827
	MTrackJ: Points GFPS3 initial.csv	-0.0467598	28.784	7.196	0.208276
	MTrackJ: Points P17-1 initial.csv	0.311237	26.6958	6.67395	0.372861			0.315838		0.359081
	MTrackJ: Points_P17_5 initial.csv	0.320438	21.2714	5.31786	0.345301
	MTrackJ: Points P17i_1 initial.csv	0.0600581	17.0796	4.27497	0.209522			0.0398087		0.214301
	MTrackJ: Points P17i_4 initial.csv	0.0195593	17.7433	4.43847	0.219081
	MTrackJ: Points GFP3 initial.csv	0.0823227	21.7876	5.45412	0.250647
	Repeat 2
		cos(theta)	speed	distance	directness
	MTrackJ: Points GFP 5 initial.csv	0.0412563	17.7613	4.44405	0.254789			0.0228808		0.226058
	MTrackJ: Points gfp_S6 initial.csv	0.00450533	17.0653	4.27229	0.197328
	MTrackJ: Points P16_S6 initial.csv	0.216951	20.9743	5.246	0.36885			0.21359		0.333626
	MTrackJ: Points P17 S8 initial.csv	0.21023	21.0431	5.26542	0.298402
	MTrackJ: Points P17i_s6 initial.csv	0.0100843	13.1369	3.29038	0.309726			0.0201169		0.303202
	MTrackJ: Points P17i_s7 initial.csv	0.0301496	15.2612	3.81801	0.296677
	Rep 3
		cos(theta)	speed	distance	directness
	MTrackJ: Points GFP_S6 initial.csv	0.048935	19.7606	4.94416	0.222643			0.0604248		0.239693
	MTrackJ: Points gfp_S8 initial.csv	0.0719146	31.111	7.7869	0.256743
	MTrackJ: Points P17_S6 initial.csv	0.281781	20.6149	5.15373	0.39344			0.247504		0.349064
	MTrackJ: Points P17_S7 initial.csv	0.213228	18.6009	4.65376	0.304688
	MTrackJ: Points P17i_5 initial.csv	-0.0221074	13.8996	3.48636	0.242366			-0.0174516		0.209449
	MTrackJ: Points P17i_8 initial.csv	-0.0127959	14.4991	3.6284	0.176533
