# Supplementary material for: CYRI-B-mediated macropinocytosis drives metastasis via lysophosphatidic acid receptor uptake
Source: eLife journal article supplement (doi:10.7554/elife.83712), 2024-05-07
Supplement: fig4-figsupp1-data2 [file Figure 4- figure supplement 1- source data 2 Excel.xlsx]

## Sheet: Sheet1
		PDACB proliferation assay
			Repeat 1
			Control			Ex3			Ex4
			technical repeat 1	technical repeat 2	Average	technical repeat 1	technical repeat 2	Average	technical repeat 1	technical repeat 2	Average
		Day 1	5000		5000	5000		5000	5000		5000
		Day 2	26000	25000	25500	20700	23500	22100	23500	30000	26750
		Day 3	84400	77600	81000	83100	80400	81750	126000	133000	129500
		Day 4	286000	285000	285500	262000	339000	300500	348000	407000	377500
		Day 5	1430000	1470000	1450000	1600000	1990000	1795000	2190000	2000000	2095000
			Repeat 2
			Control			Ex3			Ex4
			technical repeat 1	technical repeat 2	Average	technical repeat 1	technical repeat 2	Average	technical repeat 1	technical repeat 2	Average
		Day 1	5000		5000	5000		5000	5000		5000
		Day 2	20000	14700	17350	16600	10100	13350	12700	17400	15050
		Day 3	76400	50200	63300	66800	45200	56000	36800	45700	41250
		Day 4	144000	153000	148500	101000	112000	106500	107000	151000	129000
		Day 5	312000	349000	330500	370000	373000	371500	326000	320000	323000
			Repeat 3
			Control			Ex3			Ex4
			technical repeat 1	technical repeat 2		technical repeat 1	technical repeat 2		technical repeat 1	technical repeat 2
		Day 1	5000		5000	5000		5000	5000		5000
		Day 2	18400	10100	14250	18000	15000	16500	8720	16400	12560
		Day 3	41600	40100	40850	24700	34500	29600	40100	38100	39100
		Day 4	105000	100000	102500	106000	90000	98000	120000	203000	161500
		Day 5	316000	335000	325500	267000	321000	294000	331000	311000	321000
