# Supplementary material for: CYRI-B-mediated macropinocytosis drives metastasis via lysophosphatidic acid receptor uptake
Source: eLife journal article supplement (doi:10.7554/elife.83712), 2024-05-07

## Acquisition Information

| # | Image ID   | Acquire Time         | Channels | Resolution | Intensities | Image Name | Comment | Image Modifications       |
|---|------------|----------------------|----------|------------|-------------|------------|---------|---------------------------|
| 1 | 0000071_02 | 16-Sep-2020 13:58:12 | 700 800  | 169um      | Auto Auto   | 0000071_02 |         | Crop Image ID: 0000071_01 |

## Image Display Values

| Channel | Color                       | Minimum | Maximum | K |
|---------|-----------------------------|---------|---------|---|
| 800     | Gray Scale (Black on White) | 1.98    | 32.0    | 1 |

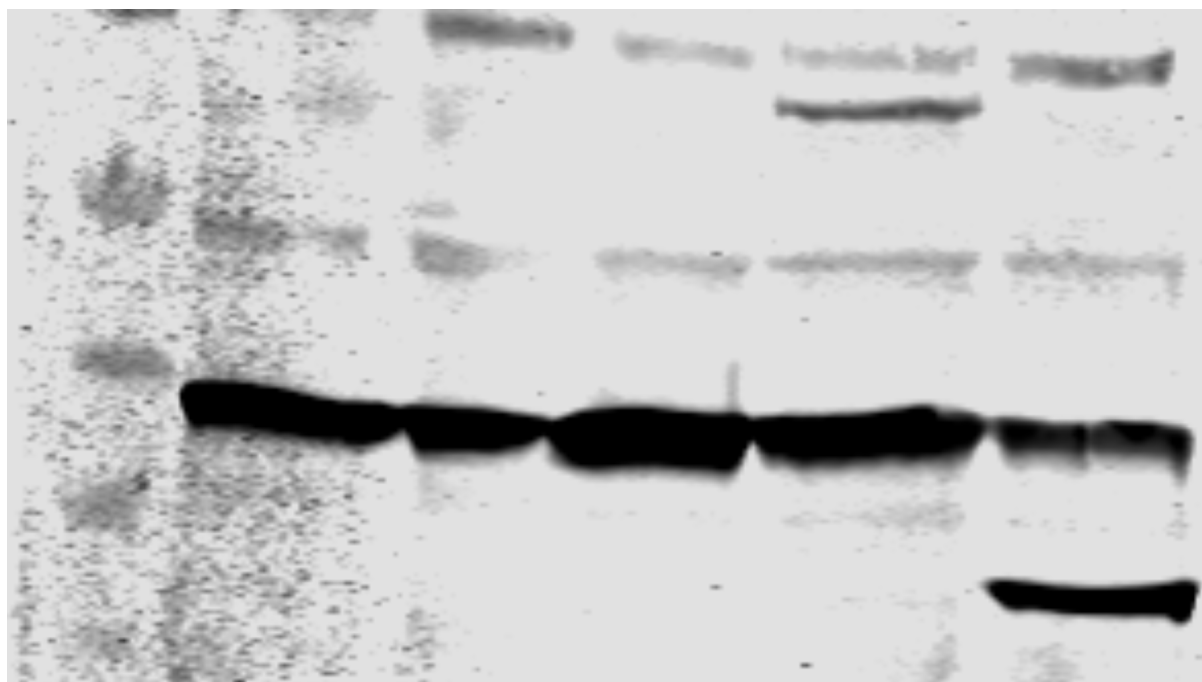

Supplement: fig4-figsupp2-data1 [file elife-83712-fig4-figsupp2-data1-v2.zip]
