# Supplementary material for: CYRI-B-mediated macropinocytosis drives metastasis via lysophosphatidic acid receptor uptake
Source: eLife journal article supplement (doi:10.7554/elife.83712), 2024-05-07
Supplement: fig4-figsupp2-data2 [file Figure 4- figure supplement 2- source data 2 Excel B.xlsx]

## Sheet: Sheet1
	Repeat 1
			with big lamellipodia	no lamellipodia		Total number of cells		Percentage of cells with lamellipodia	Percentage of cells without lamellipodia
	GFP	Image 1	3	2		23
		Image 2	3	0
		Image 3	3	1
		Image 4	2	0
		Image 5	1	0
		Image 6	2	0
		Image 7	1	1
		Image 8	3	1
		Total cells	18	5				78.2609	21.7391
	P17	Image 1	1	7		53
		Image 2	0	4
		Image 3	4	5
		Image 4	2	7
		Image 5	0	9
		Image 6	0	7
		Image 7	2	0
		Image 8	2	0
		Image 9	3	0
		Total cells	14	39				26.4151	73.5849
	Repeat 2
			with big lamellipodia	no lamellipodia
	GFP	Image 1	2	2
		Image 2	2	1
		Image 3	3	1
		Image 4	2	4
		Image 5	3	1
		Image 6	3	0
		Image 7	3	1
		Image 8	2	3
		Image 9	2	1
		Image 10	2	0
		Image 11	4	2
		Image 12	2	2
		Total cells	30	18		48		62.5	37.5
	P17	Image 1	0	6
		Image 2	2	1
		Image 3	1	3
		Image 4	5	2
		Image 5	2	2
		Image 6	0	4
		Image 7	0	3
		Image 8	0	2
		Image 9	1	2
		Image 10	0	3
		Image 11	1	5
		Total cells	12	33		45		26.6667	73.3333
	Repeat 3
	GFP	Image 1	3	2
		Image 2	4	1
		Image 3	3	3
		Image 4	3	2
		Image 5	4	3
		Image 6	3	3
		Total cells	20	14		34		58.8235	41.1765
	P17	Image 1	1	5
		Image 2	1	5
		Image 3	1	5
		Image 4	5	2
		Image 5	5	4
		Total cells	13	21		34		38.2353	61.7647
	Repeat 4
	GFP	Image 1	3	0
		Image 2	4	2
		Image 3	4	1
		Image 4	3	0
		Image 5	2	0
		Image 6	2	0
		Image 7	2	0
		Total cells	20	3		23		86.9565	13.0435
	P17	Image 1	1	6
		Image 2	1	2
		Image 3	3	8
		Image 4	0	3
		Total cells	5	19		24		20.8333	79.1667
