# Supplementary material for: CYRI-B-mediated macropinocytosis drives metastasis via lysophosphatidic acid receptor uptake
Source: eLife journal article supplement (doi:10.7554/elife.83712), 2024-05-07
Supplement: fig4-figsupp2-data4 [file Figure 4- figure supplement 2- source data 4 D.xlsx]

## Sheet: Sheet1
		GFP								CYRI-B GFP
	Rep1		Length						Rep1		Length (um)
			Length of Arp2/3 staining	Total length of cell	Percentage ratio						Length of Arp2/3 staining	Total length of cell					0	71.89	131.036	42.403	36.346	36.665	0	0	0	0.021	42.809	363.898	0	0	0	32220	136.775	42.722	124.992	20.951	0	0	NaN	0	65535	71.89
	Image 1	Cell1 top right	71.89	229.636	31.3061												0	229.631	131.674	25.187	76.198	53.562	0	0	0	0.007	80.415	2344.99	0	0	0	207628	132.311	60.576	20.662	42.432	0	0	NaN	0	65535	229.631
									Image1	Cell 1 left top	9.769	125.683	14.9925
		Cell 2 miffle	8.808	180.185	21.5884						5.411
			24.318								3.663
			5.773								18.843
		Total	38.899
										Cell 2 right form cell 1	5.17	264.147	4.92377
		Cell 3 botom left	41.29	337.828	46.3609						7.836
			25.096								13.006
			90.234
		Total	156.62							Cell 3 right from cell 2	18.057	243.357	27.5883
											41.645
		Cell 4 middle left	38.268	195.503	31.9172						7.436
			24.131								67.138
		Total	62.399
										cell 4 right from cell 3	6.234	187.781	5.65606
											4.387
	Image 2	Cell 1 top right	13.775	247.647	33.698						10.621
			25.672
			44.005							Cell 5 top from cell 4	2.539	110.899	2.28947
		total	83.452
		cell 2 bottom left	130.21	437.51	29.7616					cell 6 bottom from cell 1	28.719	140.77	20.4014
	Image 3	Cell 1 top left	127.672	240.553	53.0744					cell 7 bottom right	22.307	149.466	14.9245
									Image 2
		Cell 2 middle	157.33	258.262	60.9188
		Cell 3 bottom right	114.185	193.16	59.1142					Cell 1 middle	23.041	229.551	22.1641
											11.119
		cell 4 middle bototm	43.881	185.859	35.8164						16.718
			22.687								50.878
		Total	66.568
										cell 2 top right	5.885	218.317	8.22016
											3.14
	Image 4	Cell 1 left	24.524	316.782	41.5342						8.921
			41.059								17.946
			41.009
			24.981						Image 3	cell 3 middle	39.747	488.973	8.12867
		Total	131.573
										Cell 1 top left	13.913	145.903	19.2594
											9.953
		cell 2 right	7.15	314.323	35.6888						4.234
			57.064								28.1
			47.964
		Total	112.178
										Cell 2 right from cell 1	8.106	183.87	29.6024
	Image 5		180.448	277.488	65.0291						9.955
											9.063
											5.744
	Image 6	Cell 1 top	193.567	341.534	56.6758						9.019
											12.543
		Cell 2 bottom	20.512	256.721	27.3577						54.43
			49.721
		Total	70.233
										cell 3 Top right	16.031	109.403	21.248
											1.669
											5.546
											23.246
										Cell 4 middle left	14.614	112.02	18.6815
				Average for repeat 1	41.9894						6.313
											20.927
										Cell 5 next to cell 4	54.137	120.072	45.0871
										Cell 6 bottom left	8.318	242.244	16.1663
											30.844
											39.162
										Cell 7 bottom right	7.605	124.946	13.2537
											8.955
											16.56
												Avereage for repeat 1	17.211

## Sheet: Sheet2
					GFP								CYRI-B GFP
				Rep2		Length						Rep2		Length
						Length of Arp2/3 staining	Total length of cell	Percentage ratio						Length of Arp2/3 staining	Total length of cell
				Image 1	Cell1 top left	63.241	151.303	49.9475				Image 1	Cell1 middle	5.86	105.117	5.57474
						12.331
					Total	75.572
					Cell 2 middle	32.949	199.12	22.1143					Cell 2 top right	12.592	82.086	15.34
						11.085							Cell 3 bottom from cell 2	4.109	78.51	5.23373
					Total	44.034
													cell 4 bottom right	9.002	145.658	6.18023
					Cell 3 botom	31.339	147.627	39.9893
						13.676
						14.02						Image 2	Cell 1 middle left	9.069	150.862	8.46071
					Total	59.035								3.695
													Total	12.764
													cell 2 middle right	5.303	165.936	20.1053
														12.439
				Image 2	Cell 1 top left	5.766	88.865	22.9494						3.414
						9.923								2.11
						4.705								2.926
					total	20.394								4.544
														2.626
					Cell 2 middle	109.047	150.252	72.5761					Total	33.362
					Cell 3 bottom right	111.691	245.695	45.4592				Image 3	Cell 1 middle left	5.017	230.413	26.0849
														35.539
														9.045
														10.502
													Total	60.103
				Image 3	Cell 1 middle left	6.484	220.277	24.7706					Cell 2 middle right	14.529	129.889	18.4488
						27.044								4.728
						21.036								4.706
					total	54.564							Total	23.963
					Cell 2 middle	13.554	137.785	40.4848					Cell 3 bottom right	3.169	139.636	2.26947
						34.776
						7.452							Cell 4 bottom left	4.161	120.405	10.8094
					total	55.782								6.384
														2.47
													Total	13.015
					Cell 3 bottom right	21.436	160.707	26.2372
						13.371
						8.865						Image 4	Cell top left	3.24	124.658	12.3466
						19.929								4.211
					Total	42.165								7.94
													Total	15.391
													Cell 2 top right	15.903	111.004	18.9993
				Image 4	Cell 1 top left	50.284	167.01	42.1472						5.187
						10.95							Total	21.09
						9.156
					Total	70.39
													Cell 3 middle	130.533	262.389	55.3628
														14.733
					cell 2 middle left	19.399	77.539	25.0184					Total	145.266
					Cell 3 middle right	63.76	135.537	47.0425					Cell 4 bottom right	19.647	125.955	18.0866
														3.134
					Cell 4 middle bottom	4.858	86.233	8.03405					Total	22.781
						2.07
					Total	6.928
				Image 5	Cell 1 middle left	181.476	224.396	80.8731					Cell 5 bottom for right	5.774	129.367	19.6464
														19.642
					Cell 2 top right	6.439	346.201	59.4285					Total	25.416
						8.859
						92.832							cell 6 bottom left	5.233	149.204	7.70221
						97.612								6.259
					Total	205.742							Total	11.492
					Cell 3 middle bottom	109.002	310.243	44.7546
						29.846						Image 4	Cell 1 middle	5.78	106.423	9.27431
					Total	138.848								4.09
													Total	9.87
				Image 6	Cell 1 top	9.943	165.152	32.682
						14.754							Cell 2 middle left	7.131	151.243	4.71493
						29.278
					Total	53.975							cell 3 bottom right	5.976	154.828	44.9215
														4.667
					Cell 2 bottom	20.065	266.145	50.8749						58.908
						54.379							Total	69.551
						41.402
						6.521							Cell 5 bottom far right	17.966	170.189	10.5565
						9.614
						3.42
					Total	135.401							cell 6 top left	25.292	141.807	22.3099
														6.345
													Total	31.637
				Image 7	Cell 1 middle top	60.629	190.652	40.5524
						4.468
						12.217
					Total	77.314
														Average		16.3061
					Cell 2 top left	11.376	143.828	13.9159
						8.639
					Total	20.015
					Cell 3 bottom right	30.019	167.74	29.2584
						19.059
					Total	49.078
					Cell 4 bottom left	54.788	142.966	38.3224
						Average		38.9742

## Sheet: Sheet3
				GFP									CYRI-B GFP
			Rep3		Length							Rep3		Length
					Length of Arp2/3 staining	Total length of cell	Percentage ratio							Length of Arp2/3 staining	Total length of cell	Percentage ratio
			Image 1	Cell 1 top left	10.393	200.09	46.9504					Image 1	Cell 1 top	27.938	111.151	25.1352
					64.022
					13.694
					5.834								Cell 2 bellow cell 1	20.966	118.861	17.6391
				Total	93.943
													Cell 3 bellow cell 2	6.634	119.856	14.5383
				Cell 2 middle left	14.079	103.081	13.6582							10.791
													Total	17.425
													cell 4 middle far left	7.38	144.018	10.2071
				Cell 3 top right	23.729	310.47	22.4592							7.32
					10.613								Total	14.7
					17.655
					17.732								Cell 5 middle bottom	12.812	86.785	21.9946
				Total	69.729									6.276
													Total	19.088
				Cell 4 bottom	154.52	214.604	72.0024
												Image 2	CEll1 middle	1.275	89.962	1.41727
				Cell 5 top right	2.778	302.109	45.09
					34.741								cell 2 middle right	9.615	99.62	13.8848
					22.205									4.217
					38.928								Total	13.832
					6.328
					3.103
					13.856								cell 3 bellow cell 1	5.243	113.386	4.62403
					14.282
				Total	136.221
													cell 4 middle right top	6.085	112.939	5.51625
														0.145
				Cell 4 middle bottom	4.295	396.794	38.8831						Total	6.23
					5.68
					29.57
					94.243								cell 5 top right	6.806	104.82	14.9313
					20.498									1.901
				Total	154.286									1.913
														5.031
													Total	15.651
				Cell 5 middle right	5.79	162.401	3.56525
													cell 6	10.937	182.198	26.0963
														3.258
				cell 6 top left	2.809	153.582	27.3066							5.035
					9.2									2.145
					8.96									7.407
					20.969									18.765
				Total	41.938								Tota;	47.547
				Cell 7 bottom left	11.579	212.288	12.1552
					14.225
				Total	25.804							Image 3	Cell middle left	6.114	161.475	10.165
														6.567
														3.733
													Total	16.414
			Image 3	Cell 1 middle	5.821	150.1	13.8701
					5.906
					9.092
				Total	20.819								cell 2 middle top	7.881	164.245	4.79832
				Cell 2 middle left	108.332	330.331	35.5295
					9.033								Cell 3 middle far top	7.44	143.152	12.829
				Total	117.365									3.036
														7.889
													Total	18.365
				cell 3 right	87.717	246.494	42.5649
					17.203								Cell 4 middle left bottom	10.636	132.525	15.4575
				Total	104.92									7.45
														2.399
				cell 4 bottom right	48.004	165.506	37.4434						Total	20.485
					10.084
					3.883								Cell 5 bottom right	3.965	121.979	12.9776
				Total	61.971									11.865
													Total	15.83
													Cell 6	18.294	118.779	31.5359
														10.862
														8.302
			Image 4	Cell 1 middle left	29.753	356.975	46.4209						Total	37.458
					23.151
					67.627
					40.783
					4.397
				Total	165.711										average	14.3381
				cell 2 middle right	24.259	273.206	31.7035
					33.272
					8.015
					21.07
				Total	86.616
				cell 3 bottom right	30.36	203.347	48.5181
					58.464
					9.836
				Total	98.66
				Cell 4 middle far left	15.976	124.775	12.8038
						Average	32.4073
