# Supplementary material for: CYRI-B-mediated macropinocytosis drives metastasis via lysophosphatidic acid receptor uptake
Source: eLife journal article supplement (doi:10.7554/elife.83712), 2024-05-07
Supplement: fig4-figsupp2-data5 [file Figure 4- figure supplement 2- source data 5 E.xlsx]

## Sheet: Sheet1
	Arpc2 intensity at the leading edge
			Rep 1
			GFP
		Image 1	Cell 1 bottom left								Image 1	Cell 2 top right							Image 2	Cell 1 top right								Image 2	Cell 2 bottom left							Image 3	Cell 1 top left							Image 3	Cell 2 middle
			Length (um)	Intensity arpc2		Highest peak of arpC2	Ratio (%)				Length (um)	Intensity arpc2			Highest peak of arpC2	Ratio (%)			Length (um)	Intensity arpc2			Highest peak of arpC2	Ratio (%)				Length (um)	Intensity arpc2			Highest peak of arpC2	Ratio (%)			Length (um)	Intensity arpc2			Highest peak of arpC2	Ratio (%)			Length (um)	Intensity arpc2			Highest peak of arpC2	Ratio (%)
			0	1							0	0							0	0								0	0							0	6							0	18.667
			0.10627	5.946		2164.77	7.10621				0.10627	0			2461.46	4.05121			0.10627	5.67			2448.25	12.2282				0.10627	8.79			2153.88	3.37951			0.1063	4.125			2120.29	5.35089			0.10627	60.949			3209.58	5.24665
			0.21255	12.559							0.21255	0							0.21255	9.422								0.21255	11.264							0.2125	7.046							0.21255	123.456
			0.31882	131.936							0.31882	0							0.31882	2.69								0.31882	5.234							0.3188	0.032							0.31882	249.857
			0.4251	503.618							0.4251	3.132							0.4251	0.156								0.4251	6.071							0.4251	3.663							0.4251	579.464
			0.53137	1010.1							0.53137	1.68							0.53137	1.54								0.53137	65.186							0.5314	8.901							0.53137	1696.98
			0.63764	1664.93							0.63764	2.196							0.63764	0.238								0.63764	388.481							0.6376	34.668							0.63764	3209.58
			0.74392	2060.21							0.74392	7.916							0.74392	11.053								0.74392	1219.84							0.7439	216.925							0.74392	2865.49
			0.85019	2128.22							0.85019	16.121							0.85019	284.777								0.85019	1801.5							0.8502	1552.99							0.85019	1800.37
			0.95647	1922.52							0.95647	198.651							0.95647	1023.96								0.95647	1922.26							0.9565	2120.29							0.95647	988.497
			1.06274	1920.48							1.06274	648.235							1.06274	1913.34								1.06274	2153.88							1.0627	1825.54							1.06274	661.266
			1.16901	2164.77							1.16901	1470.71							1.16901	2287.09								1.16901	1936.18							1.169	1062.96							1.16901	828.594
			1.27529	1877.49							1.27529	2008.38							1.27529	2206.24								1.27529	1668.43							1.2753	1007.12							1.27529	1151.72
			1.38156	1805.23							1.38156	2461.46							1.38156	2448.25								1.38156	1724.17							1.3816	1092.1							1.38156	979.362
			1.48784	1653.41							1.48784	2316.52							1.48784	1965.53								1.48784	1558.38							1.4878	1089.37							1.48784	723.804
			1.59411	1650.7							1.59411	2149.26							1.59411	1419.37								1.59411	1040.55							1.5941	997.39							1.59411	981.777
			1.70038	2135.41							1.70038	1403.33							1.70038	1499.77		Average of cytosolic bacgkound						1.70038	1191.52							1.7004	548.077							1.70038	807.718
			1.80666	2158.85							1.80666	993.691		Average of cytosolic bacgkound					1.80666	1456.31		200.213						1.80666	1181.62			Average of cytosolic bacgkound				1.8067	574.138							1.80666	684.426
			1.91293	1959.45							1.91293	896.081		607.587					1.91293	1183.9								1.91293	775.545			637.335				1.9129	319.052							1.91293	498.027
			2.01921	1168.62		Average of cytosolic bacgkound					2.01921	1564.86							2.01921	754.44								2.01921	194.32							2.0192	324.353			Average of cytosolic bacgkound				2.01921	252.178			Average of cytosolic bacgkound
			2.12548	531.856		304.631					2.12548	2092.47							2.12548	380.055								2.12548	116.152							2.1255	211.493			396.249				2.12548	360.211			611.739
			2.23175	599.478							2.23175	1446.19							2.23175	104.561								2.23175	358.451							2.2318	157.913							2.23175	840.382
			2.33803	877.573							2.33803	876.393							2.33803	122.311								2.33803	638.696							2.338	114.754							2.33803	1204.36
			2.4443	1043.64							2.4443	1000.25							2.4443	351.737								2.4443	673.872							2.4443	222.047							2.4443	864.602
			2.55058	1020.49							2.55058	964.759							2.55058	171.24								2.55058	153.257							2.5506	244.109							2.55058	694.832
			2.65685	822.302							2.65685	1248.02							2.65685	62.684								2.65685	100.615							2.6569	240.542							2.65685	628.265
			2.76312	358.65							2.76312	1424.73							2.76312	30.732								2.76312	375.395							2.7631	384.728							2.76312	569.039
			2.8694	86.455							2.8694	1419.11							2.8694	13.259								2.8694	450.462							2.8694	151.873							2.8694	455.32
			2.97567	114.405							2.97567	1227.58							2.97567	3.646								2.97567	285.85							2.9757	113.588							2.97567	593.701
			3.08195	172.215							3.08195	904.594							3.08195	55.576								3.08195	191.304							3.0819	117.196							3.08195	442.318
			3.18822	254.666							3.18822	879.247							3.18822	75.684								3.18822	126.177							3.1882	181.7							3.18822	275.011
			3.29449	158.944							3.29449	963.026							3.29449	60.984								3.29449	218.991							3.2945	495.955							3.29449	260.172
			3.40077	176.047							3.40077	1326.81							3.40077	60.105								3.40077	313.753							3.4008	629.132							3.40077	481.63
			3.50704	163.678							3.50704	1124.01							3.50704	128.019								3.50704	344.811							3.507	518.644							3.50704	365.824
			3.61332	195.912							3.61332	774.774							3.61332	307.019								3.61332	429.518							3.6133	378.848							3.61332	324.752
			3.71959	387.485							3.71959	686.541							3.71959	313.258								3.71959	643.055							3.7196	417.751							3.71959	381.738
			3.82586	473.684							3.82586	593.942							3.82586	142.289								3.82586	600.896							3.8259	298.162							3.82586	354.112
			3.93214	322.505							3.93214	327.668							3.93214	9.659								3.93214	603.321							3.9321	328.844							3.93214	404.276
			4.03841	284.541							4.03841	175.871							4.03841	34.68								4.03841	618.88							4.0384	601.856							4.03841	330.227
			4.14469	232.976							4.14469	239.43							4.14469	94.381								4.14469	559.456							4.1447	631.238							4.14469	514.403
			4.25096	101.401							4.25096	211.078							4.25096	168.934								4.25096	276.028							4.251	621.773							4.25096	538.338
			4.35723	104.088							4.35723	321.146							4.35723	387.19								4.35723	253.055							4.3572	603.543							4.35723	564.851
			4.46351	129.346							4.46351	514.156							4.46351	314.945								4.46351	264.74							4.4635	466.037							4.46351	499.629
			4.56978	94.931							4.56978	606.928							4.56978	127.963								4.56978	339.718							4.5698	397.498							4.56978	491.989
			4.67606	147.183							4.67606	760.084							4.67606	55.981								4.67606	368.951							4.6761	563.518							4.67606	569.523
			4.78233	219.845							4.78233	694.172							4.78233	48.321								4.78233	612.784							4.7823	202.845							4.78233	448.852
			4.88861	232.536							4.88861	459.628							4.88861	24.024								4.88861	594.52							4.8886	128.126							4.88861	407.152
			4.99488	258.556							4.99488	319.333							4.99488	85.29								4.99488	433.696							4.9949	272.612							4.99488	290.821
			5.10115	285.094							5.10115	520.775							5.10115	204.247								5.10115	671.194							5.1012	419.21							5.10115	387.785
			5.20743	256.27							5.20743	978.917							5.20743	188.969								5.20743	1234.33							5.2074	405.249							5.20743	485.628
			5.3137	260.071							5.3137	823.254							5.3137	102.463								5.3137	1016.78							5.3137	441.639							5.3137	710.816
			5.41998	324.791							5.41998	559.504							5.41998	42.313								5.41998	1134.03							5.42	297.895							5.41998	819.45
			5.52625	384.059							5.52625	487.273							5.52625	21.678								5.52625	1062.34							5.5262	272.786							5.52625	628.087
			5.63252	338.209							5.63252	423.141							5.63252	80.186								5.63252	792.634							5.6325	316.19							5.63252	579.978
			5.7388	358.404							5.7388	325.073							5.7388	265.572								5.7388	595.412							5.7388	284.292							5.7388	543.835
			5.84507	456.997							5.84507	254.589							5.84507	320.665								5.84507	330.172							5.8451	251.172							5.84507	387.448
			5.95135	411.961							5.95135	239.128							5.95135	118.453								5.95135	136.644							5.9513	241.05							5.95135	648.16
			6.05762	366.18							6.05762	343.921							6.05762	21.76								6.05762	497.76							6.0576	419.143							6.05762	714.08
			6.16389	460.859							6.16389	366.606							6.16389	42.836								6.16389	559.837							6.1639	633.592							6.16389	645.364
			6.27017	336.96							6.27017	322.637							6.27017	70.434								6.27017	619.47							6.2702	622.154							6.27017	376.05
			6.37644	397.376							6.37644	398.615							6.37644	113.504								6.37644	854.019							6.3764	566.16							6.37644	77.923
			6.48272	549.962							6.48272	527.149							6.48272	60.309								6.48272	634.354							6.4827	640.381							6.48272	527.678
			6.58899	405.48							6.58899	692.069							6.58899	65.782								6.58899	479.765							6.589	840.155							6.58899	1888.47
			6.69526	315.193							6.69526	522.664							6.69526	214.009								6.69526	411.325							6.6953	670.346							6.69526	1729.46
			6.80154	362.962							6.80154	359.793							6.80154	117.596								6.80154	488.632							6.8015	240.458							6.80154	699.278
			6.90781	471.855							6.90781	456.184							6.90781	42.371								6.90781	516.753							6.9078	202.96							6.90781	430.789
			7.01409	367.832							7.01409	403.925							7.01409	60.15								7.01409	593.779							7.0141	315.414							7.01409	361.686
			7.12036	286.312							7.12036	461.183							7.12036	20.987								7.12036	547.31							7.1204	251.844							7.12036	569.334
			7.22663	255.283							7.22663	314.768							7.22663	26.04								7.22663	632.045							7.2266	139.41							7.22663	427.405
			7.33291	310.109							7.33291	303.408							7.33291	159.944								7.33291	677.264							7.3329	202.937							7.33291	402.988
			7.43918	305.71							7.43918	344.929							7.43918	343.587								7.43918	483.493							7.4392	373.607							7.43918	316.994
			7.54546	335.017							7.54546	332.737							7.54546	511.057								7.54546	410.995							7.5455	307.412							7.54546	904.801
			7.65173	226.706							7.65173	400.178							7.65173	494.237								7.65173	683.623							7.6517	190.562							7.65173	837.481
			7.758	60.045							7.758	366.983							7.758	172.136								7.758	1044.55							7.758	182.868							7.758	575.413
			7.86428	64.059							7.86428	166.685							7.86428	203.396								7.86428	863.786							7.8643	154.499							7.86428	526.796
			7.97055	78.454							7.97055	56.283							7.97055	328.978								7.97055	862.889							7.9706	394.375							7.97055	732.837
			8.07683	63.074							8.07683	107.044							8.07683	199.52								8.07683	866.84							8.0768	594.162							8.07683	882.622
			8.1831	36.793							8.1831	170.454							8.1831	189.193								8.1831	946.435							8.1831	445.062							8.1831	1347.98
			8.28937	159.004							8.28937	246.498							8.28937	326.195								8.28937	745.34							8.2894	617.153							8.28937	1294.36
			8.39565	185.102							8.39565	270.137							8.39565	281.527								8.39565	933.925							8.3956	590.042							8.39565	1358.88
			8.50192	136.234							8.50192	311.641							8.50192	297.931								8.50192	658.211							8.5019	447.244							8.50192	813.188
			8.6082	380.378							8.6082	392.228							8.6082	295.247								8.6082	475.305							8.6082	470.49							8.6082	496.893
			8.71447	518.304							8.71447	537.59							8.71447	178.425								8.71447	576.458							8.7145	558.98							8.71447	298.248
			8.82074	423.678							8.82074	752.535							8.82074	142.903								8.82074	837.359							8.8207	683.112							8.82074	809.072
			8.92702	300.342							8.92702	735.632							8.92702	347.197								8.92702	1184.32							8.927	609.898							8.92702	719.725
			9.03329	280.914							9.03329	563.842							9.03329	496.432								9.03329	797.867							9.0333	519.126							9.03329	631.015
			9.13957	258.717							9.13957	551.873							9.13957	349.695								9.13957	680.932							9.1396	603.191							9.13957	676.989
			9.24584	256.388							9.24584	441.75							9.24584	264.722								9.24584	732.314							9.2458	430.368							9.24584	615.317
			9.35211	271.488							9.35211	453.402							9.35211	322.128								9.35211	1023.85							9.3521	313.906							9.35211	605.062
			9.45839	222.341							9.45839	509.294							9.45839	332.607								9.45839	1295.89							9.4584	388.201							9.45839	662.946
			9.56466	159.3							9.56466	495.865							9.56466	233.083								9.56466	1240.47							9.5647	853.98							9.56466	357.44
			9.67094	62.421							9.67094	535.048							9.67094	427.679								9.67094	1269.92							9.6709	737.093							9.67094	165.764
			9.77721	112.235							9.77721	639.735							9.77721	536.414								9.77721	1098.82							9.7772	375.178							9.77721	465.185
			9.88348	225.327							9.88348	494.967							9.88348	584.616								9.88348	1202.39							9.8835	230.382							9.88348	800.72
			9.98976	197.667							9.98976	393.333							9.98976	508.068								9.98976	1232.23							9.9898	449.906							9.98976	816.332
																			10.096	292								10.096	1300							10.096	462.458							10.096	941.667
																																				10.2023	539.27
																																				10.3086	392.13
																																				10.4149	168.95
																																				10.5211	232.359
																																				10.6274	481.333
			CYRI-B GFP
																																	Image 2	Cell 1 top right						Image 2	Cell 2 middle top					Image3	Cell middle left
			Image 1	Cell 1 top left						Image 1	Cell 2 top right						Image 1	Cell 3 middle bottom							Image 1	Cell 3 mniddle left
																																	Length (um)	Intensity arpc2		Highest peak of arpC2	Ratio			Length (um)	Intensity arpc2		Highest peak of arpC2	Ratio		Length (um)	Intensity arpc2		Highest peak of arpC2
				Length (um)	Intensity arpc2		Highest peak of arpC2	Ratio (%)			Length (um)	Intensity arpc2		Highest peak of arpC2	Ratio (%)			Length (um)	Intensity arpc2		Highest peak of arpC2	Ratio (%)			Length (um)	Intensity arpc2		Highest peak of arpC2	Ratio (%)				0	9						0	433.111					0	109
																																	0.10627	36.811						0.10627	971.313					0.10627	204.349
				0	113						0	11						0	301						0	151.667							0.21255	5.732						0.21255	1349.37		1518.8	1.21211		0.21255	312.916		2609.13
				0.10627	129.095						0.10627	267.201						0.10627	1204.51						0.10627	688.026							0.31882	37.647		5571.54	3.44744			0.31882	1246.53					0.31882	494.115
				0.21255	498.326		1390.32	1.52109			0.21255	1034.01		2032.67	3.08526			0.21255	1714.34		1714.34	3.39305			0.21255	1572.26		1660.53	1.54101				0.4251	93.099						0.4251	897.534					0.4251	1175.7
				0.31882	841.232						0.31882	1737.16						0.31882	1416.88						0.31882	1660.53							0.53137	751.507						0.53137	1518.8					0.53137	2325.28
				0.4251	989.921						0.4251	1798.54						0.4251	1063.38						0.4251	1009.89							0.63764	2682.08						0.63764	1477.2					0.63764	2609.13
				0.53137	1390.32						0.53137	1438.17						0.53137	1267.12						0.53137	678.082							0.74392	3806.55						0.74392	976.656					0.74392	1595.12
				0.63764	1379.65						0.63764	1569.47						0.63764	1377.82						0.63764	435.796							0.85019	4501.66						0.85019	772.868					0.85019	1104.45
				0.74392	1151.25						0.74392	1686.27						0.74392	1202.49						0.74392	390.787							0.95647	5571.54						0.95647	934.311					0.95647	753.118
				0.85019	778.411						0.85019	2032.67						0.85019	789.396						0.85019	454.23							1.06274	4989.56						1.06274	938.905					1.06274	721.86
				0.95647	639.99						0.95647	1982.32						0.95647	400.915						0.95647	446.717							1.16901	3617.34						1.16901	879.794					1.16901	1064.99
				1.06274	541.474						1.06274	1718.37						1.06274	160.597						1.06274	470.104							1.27529	2357.26						1.27529	779.466					1.27529	1103.43
				1.16901	518.053						1.16901	1197.95						1.16901	142.123						1.16901	438.512							1.38156	1674.39						1.38156	636.043					1.38156	1203.25
				1.27529	457.326						1.27529	389.877						1.27529	154.257						1.27529	363.683							1.48784	1075.38						1.48784	525.234					1.48784	1236.69
				1.38156	336.263						1.38156	280.315						1.38156	93.64						1.38156	220.789							1.59411	1155.52						1.59411	372.343					1.59411	1417.18
				1.48784	127.821						1.48784	419.554						1.48784	251.566						1.48784	438.058							1.70038	1677.38						1.70038	502.806					1.70038	1588.9
				1.59411	252.474						1.59411	450.754						1.59411	259.324						1.59411	598.527							1.80666	2101.55						1.80666	740.822					1.80666	1807.55
				1.70038	472.442						1.70038	400.801						1.70038	141.993						1.70038	496.624							1.91293	1538.38						1.91293	713.019					1.91293	1620.95
				1.80666	443.084						1.80666	522.109						1.80666	145.992						1.80666	282.206							2.01921	1058.74						2.01921	768.867		Average of cytosolic bacgkound			2.01921	1477.86		Average of cytosolic bacgkound
				1.91293	533.105						1.91293	412.477						1.91293	186.553						1.91293	253.193							2.12548	1006.27		Average of cytosolic bacgkound				2.12548	606.34		1253.03			2.12548	1217.49		1366.96
				2.01921	509.6						2.01921	349.444						2.01921	264.6						2.01921	176.613							2.23175	894.429		1616.14				2.23175	652.837					2.23175	1587.63
				2.12548	336.211		Average of cytosolic bacgkound				2.12548	332.474		Average of cytosolic bacgkound				2.12548	364.335		Average of cytosolic bacgkound				2.12548	280.549		Average of cytosolic bacgkound					2.33803	800.89						2.33803	700.321					2.33803	1444.29
				2.23175	186.011		914.029				2.23175	366.119		658.833				2.23175	389.416			505.249			2.23175	482.676		1077.56					2.4443	695.788						2.4443	916.149					2.4443	1497.96
				2.33803	428.184						2.33803	604.48						2.33803	313.711						2.33803	647.682							2.55058	800.74						2.55058	960.824					2.55058	1275.07
				2.4443	666.411						2.4443	692.905						2.4443	308.648						2.4443	617.543							2.65685	858.292						2.65685	874.211					2.65685	1082.61
				2.55058	573.174						2.55058	656.203						2.55058	284.734						2.55058	507.24							2.76312	995.743						2.76312	717.308					2.76312	866.419
				2.65685	562.421						2.65685	465.52						2.65685	255.457						2.65685	736.926							2.8694	1206.69						2.8694	591.266					2.8694	740.003
				2.76312	451.021						2.76312	304.642						2.76312	287.343						2.76312	882.849							2.97567	1176.06						2.97567	695.768					2.97567	672.848
				2.8694	317						2.8694	265.639						2.8694	262.538						2.8694	597.891							3.08195	1164.34						3.08195	599.664					3.08195	738.815
				2.97567	567.51						2.97567	458.897						2.97567	215.373						2.97567	589.258							3.18822	810.812						3.18822	748.178					3.18822	920.646
				3.08195	823.063						3.08195	790.828						3.08195	134.829						3.08195	842.077							3.29449	809.437						3.29449	1090.66					3.29449	1118.42
				3.18822	886.789						3.18822	906.596						3.18822	98.96						3.18822	744.02							3.40077	884.071						3.40077	1398.52					3.40077	1221.19
				3.29449	689.737						3.29449	733.328						3.29449	108.419						3.29449	980.589							3.50704	656.493						3.50704	1775.7					3.50704	1375.01
				3.40077	579.442						3.40077	416.677						3.40077	139.974						3.40077	1257.03							3.61332	800.773						3.61332	2074.37					3.61332	1245.08
				3.50704	573.126						3.50704	605.337						3.50704	187.803						3.50704	1364.77							3.71959	914.5						3.71959	1838.33					3.71959	777.59
				3.61332	575.874						3.61332	776.992						3.61332	389.719						3.61332	1121.76							3.82586	1004.78						3.82586	1489.37					3.82586	773.323
				3.71959	463.947						3.71959	850.947						3.71959	495.127						3.71959	858.374							3.93214	1102.03						3.93214	1415.29					3.93214	1041.32
				3.82586	653.358						3.82586	1047.92						3.82586	384.527						3.82586	792.836							4.03841	1042.52						4.03841	1951.62					4.03841	1132.31
				3.93214	560.747						3.93214	1213.84						3.93214	354.535						3.93214	784.144							4.14469	949.145						4.14469	2440.82					4.14469	1247.1
				4.03841	620.5						4.03841	1097						4.03841	433.08						4.03841	1025.47							4.25096	1136.27						4.25096	2497.19					4.25096	1905.85
				4.14469	491.442						4.14469	924.375						4.14469	549.851						4.14469	806.231							4.35723	1073.84						4.35723	2147.22					4.35723	2128.43
				4.25096	471.816						4.25096	588.842						4.25096	465.795						4.25096	967.006							4.46351	1198.99						4.46351	1900.05					4.46351	1494.65
				4.35723	467.137						4.35723	420.716						4.35723	417.474						4.35723	1167.45							4.56978	1441.29						4.56978	1694.82					4.56978	889.234
				4.46351	613.032						4.46351	650.747						4.46351	430.41						4.46351	1400.72							4.67606	1438.98						4.67606	1621.33					4.67606	918.913
				4.56978	597.126						4.56978	903.087						4.56978	344.359						4.56978	1530.03							4.78233	2030.05						4.78233	1784.92					4.78233	1150.71
				4.67606	531.768						4.67606	988.6						4.67606	427.005						4.67606	1233.07							4.88861	1862.11						4.88861	1807.64					4.88861	1371.56
				4.78233	715.526						4.78233	798.877						4.78233	466.795						4.78233	1301.79							4.99488	1395.31						4.99488	2021.01					4.99488	1304
				4.88861	896.689						4.88861	892.016						4.88861	622.995						4.88861	1362.65							5.10115	1439.1						5.10115	1873.28					5.10115	1515.25
				4.99488	783.695						4.99488	743.368						4.99488	1108.71						4.99488	1330.32							5.20743	1742.69						5.20743	2192.07					5.20743	2095.72
				5.10115	632.111						5.10115	408.432						5.10115	1136.88						5.10115	1441.19							5.3137	2060.36						5.3137	1927.96					5.3137	1868.87
				5.20743	762.6						5.20743	397.992						5.20743	1092.16						5.20743	1549.28							5.41998	2381.6						5.41998	1379.62					5.41998	1711.73
				5.3137	742.816						5.3137	448.281						5.3137	929.312						5.3137	1438.04							5.52625	2350.89						5.52625	1084.63					5.52625	1519.85
				5.41998	517.453						5.41998	613.853						5.41998	535.745						5.41998	1283.63							5.63252	1907.9						5.63252	1037.23					5.63252	1489.53
				5.52625	584.168						5.52625	817.889						5.52625	492.363						5.52625	1227.32							5.7388	2174.75						5.7388	1071.45					5.7388	1882.85
				5.63252	1129.78						5.63252	1113.95						5.63252	426.677						5.63252	1100.38							5.84507	3406.39						5.84507	830.307					5.84507	1836.84
				5.7388	1109.61						5.7388	932.793						5.7388	288.975						5.7388	1084.9							5.95135	3607.53						5.95135	615.078					5.95135	1787.65
				5.84507	1246.47						5.84507	697.129						5.84507	352.968						5.84507	985.571							6.05762	3560.74						6.05762	924.311					6.05762	1539.45
				5.95135	1310.56						5.95135	555.063						5.95135	600.578						5.95135	621.131							6.16389	3436.49						6.16389	1333.37					6.16389	1234.72
				6.05762	1197.8						6.05762	717.8						6.05762	520.1						6.05762	627.2							6.27017	2834.89						6.27017	1636.41					6.27017	1385.6
				6.16389	1056.46						6.16389	771.157						6.16389	395.444						6.16389	963.362							6.37644	2362.6						6.37644	1501.88					6.37644	1860.91
				6.27017	1458.2						6.27017	909.898						6.27017	497.789						6.27017	1193.32							6.48272	1954.39						6.48272	938.864					6.48272	2297.66
				6.37644	1350.34						6.37644	717.596						6.37644	497.687						6.37644	1049.44							6.58899	1596.91						6.58899	756.466					6.58899	2468.11
				6.48272	1577.27						6.48272	704.061						6.48272	572.729						6.48272	735.899							6.69526	1536.92						6.69526	844.637					6.69526	2481.03
				6.58899	1558.81						6.58899	886.758						6.58899	573.833						6.58899	675.873							6.80154	1690.08						6.80154	1085.57					6.80154	2153.34
				6.69526	1478.75						6.69526	585.782						6.69526	317.462						6.69526	1277.36							6.90781	1749.3						6.90781	827.428					6.90781	1925.48
				6.80154	1399.35						6.80154	358.908						6.80154	460.385						6.80154	1317.79							7.01409	1314.96						7.01409	621.727					7.01409	1295.72
				6.90781	1227.37						6.90781	254.667						6.90781	536.375						6.90781	1272.35							7.12036	1297.49						7.12036	773.526					7.12036	1256.97
				7.01409	1408.68						7.01409	425.979						7.01409	514.128						7.01409	1143.46							7.22663	1378.72						7.22663	1125.05					7.22663	1597.47
				7.12036	1698.02						7.12036	347.825						7.12036	475.564						7.12036	1385.99							7.33291	1354						7.33291	1286.5					7.33291	1520.19
				7.22663	1222.31						7.22663	377.193						7.22663	393.647						7.22663	1652.23							7.43918	1772.04						7.43918	1232.38					7.43918	1366.92
				7.33291	1085.19						7.33291	596.277						7.33291	504.51						7.33291	1667.39							7.54546	1969.52						7.54546	953.567					7.54546	1856.67
				7.43918	1231.58						7.43918	616.965						7.43918	628.56						7.43918	1473.44							7.65173	1803.3						7.65173	975.643					7.65173	2376.19
				7.54546	1368.92						7.54546	587.828						7.54546	642.398						7.54546	1850.75							7.758	1566.27						7.758	1357.4					7.758	2208.43
				7.65173	1542.36						7.65173	546.909						7.65173	539.382						7.65173	1852.8							7.86428	1526.83						7.86428	1427.87					7.86428	1490.83
				7.758	1473.7						7.758	551.811						7.758	475.538						7.758	1485.09							7.97055	1605.96						7.97055	680.34					7.97055	1796.86
				7.86428	1069.42						7.86428	578.663						7.86428	645.633						7.86428	967.968							8.07683	1949.6						8.07683	796.733					8.07683	1679.15
				7.97055	1256.37						7.97055	611.246						7.97055	693.694						7.97055	740.594							8.1831	1771.25						8.1831	1059.45					8.1831	1588.87
				8.07683	1115.8						8.07683	525.844						8.07683	621.58						8.07683	572.787							8.28937	1180.35						8.28937	766.132					8.28937	1710.04
				8.1831	994.968						8.1831	467.972						8.1831	781.902						8.1831	552.613							8.39565	1131.19						8.39565	987.311					8.39565	1674.57
				8.28937	796.768						8.28937	357.481						8.28937	748.648						8.28937	553.149							8.50192	1320.25						8.50192	1755.4					8.50192	1587.08
				8.39565	760.705						8.39565	438.465						8.39565	550.813						8.39565	640.655							8.6082	1452.5						8.6082	1734.68					8.6082	1604.9
				8.50192	1166.55						8.50192	859						8.50192	401.688						8.50192	1015.55							8.71447	1488.45						8.71447	1116.31					8.71447	1273.88
				8.6082	1236.35						8.6082	1189.42						8.6082	656.697						8.6082	1535.7							8.82074	1487.44						8.82074	571.78					8.82074	1097.82
				8.71447	1061.39						8.71447	1136.42						8.71447	756.867						8.71447	1232.03							8.92702	1635.93						8.92702	612.24					8.92702	980.312
				8.82074	1091.57						8.82074	559.793						8.82074	743.25						8.82074	1112.92							9.03329	1644.54						9.03329	1249.48					9.03329	821.226
				8.92702	1054.99						8.92702	597.063						8.92702	829.766						8.92702	1254.07							9.13957	1670.78						9.13957	1567.1					9.13957	927.089
				9.03329	951.053						9.03329	753.561						9.03329	945.104						9.03329	1223.8							9.24584	1939.1						9.24584	1562.32					9.24584	826.078
				9.13957	929.926						9.13957	754.846						9.13957	584.176						9.13957	932.515							9.35211	1965.91						9.35211	1690.39					9.35211	524.38
				9.24584	764.6						9.24584	1311.34						9.24584	261.933						9.24584	935.244							9.45839	2049.93						9.45839	1424.38					9.45839	471.876
				9.35211	714.805						9.35211	1220.78						9.35211	240.928						9.35211	1036.16							9.56466	2184.12						9.56466	1339.53					9.56466	531.136
				9.45839	1149.16						9.45839	550.705						9.45839	403.422						9.45839	1333.28							9.67094	2157.9						9.67094	1346.24					9.67094	661.046
				9.56466	1410.29						9.56466	453.596						9.56466	454.699						9.56466	1751.88							9.77721	1969.2						9.77721	1462.57					9.77721	796.182
				9.67094	1209.64						9.67094	329.74						9.67094	456.213						9.67094	1348.06							9.88348	1933.99						9.88348	1184.63					9.88348	553.799
				9.77721	969.395						9.77721	337.298						9.77721	665.306						9.77721	1345.64							9.98976	2142.14						9.98976	848.217					9.98976	253
				9.88348	966.242						9.88348	523.975						9.88348	803.052						9.88348	1290.35							10.096	2218.5						10.096	848.889
				9.98976	854.774						9.98976	635.99						9.98976	864.452						9.98976	973.033
				10.096	488						10.096	438.333						10.096	646						10.096	978.333
[truncated: 14 more columns]

## Sheet: Sheet2
	Arpc2 intensity at the leading edge
			Rep 2
			GFP
		Image 1	Cell 1 top left							Image 1	Cell 1 middle right							Image 2	Cell 1 middle right							Image 2	Cell 2 bottom right							Image 3	Cell 1 middle left						Image 3	Cell 2 middle left bottom							Image 3
			Length (um)	Intensity arpc2		Highest peak of arpC2	Ratio (%)				Length (um)	Intensity arpc2		Highest peak of arpC2	Ratio (%)				Length (um)	Intensity arpc2		Highest peak of arpC2	Ratio (%)				Length (um)	Intensity arpc2		Highest peak of arpC2	Ratio (%)				Length (um)	Intensity arpc2		Highest peak of arpC2	Ratio (%)			Length (um)	Intensity arpc2		Highest peak of arpC2	Ratio (%)
			0	38							0	46.5		5431.89	14.0187				0	7		3788.13	12.6923				0	20		2985.72	7.98647				0	66		3267.61	32.4252			0	29.667		2573.49	6.80555
			0.10627	71.617		1432.36	5.91121				0.10627	49.896							0.10627	18.773							0.10627	55.561							0.10627	191.238						0.10627	24.58
			0.21255	282.574							0.21255	159.961							0.21255	38.137							0.21255	223.881							0.21255	1222.7						0.21255	22.663
			0.31882	728.494							0.31882	625.742							0.31882	118.208							0.31882	338.837							0.31882	2393.17						0.31882	433.429
			0.4251	1264.4							0.4251	1344.12							0.4251	259.816							0.4251	686.13							0.4251	3267.61						0.4251	1533.1
			0.53137	1432.36							0.53137	2088.61							0.53137	552.374							0.53137	1766.69							0.53137	2978.61						0.53137	2573.49
			0.63764	851.6							0.63764	2826.75							0.63764	1511.24							0.63764	2939.78							0.63764	1542.89						0.63764	2211.69
			0.74392	408.851							0.74392	4138.42							0.74392	3438.66							0.74392	2985.72							0.74392	884.388						0.74392	1486.34
			0.85019	350.709							0.85019	5431.89							0.85019	3788.13							0.85019	2128.67							0.85019	600.931						0.85019	1257.4
			0.95647	329.272							0.95647	5183.15							0.95647	2082.42							0.95647	1147.68							0.95647	567.38						0.95647	1164.55
			1.06274	229.102							1.06274	3146.37							1.06274	886.263							1.06274	1104.19							1.06274	421.014						1.06274	733.807
			1.16901	214.794							1.16901	1667.47							1.16901	746.488							1.16901	1571.46							1.16901	321.483						1.16901	747.356
			1.27529	183.515							1.27529	1334.6							1.27529	556.275							1.27529	1980.37							1.27529	291.75						1.27529	618.294
			1.38156	211.189							1.38156	1202.15							1.38156	326.485							1.38156	1789.2							1.38156	297.552						1.38156	483.011
			1.48784	320.801							1.48784	1071.06							1.48784	225.339							1.48784	1225.79							1.48784	299.465						1.48784	499.002
			1.59411	295.752							1.59411	995.759							1.59411	213.31							1.59411	794.013							1.59411	122.072						1.59411	557.039
			1.70038	262.291							1.70038	1388.5							1.70038	262.976							1.70038	669.27							1.70038	104.394						1.70038	522.088
			1.80666	339							1.80666	1524.09							1.80666	214.954							1.80666	713.463							1.80666	113.928						1.80666	255.184
			1.91293	358.839							1.91293	1084.69		Average cytosolic background					1.91293	349.883		Average cytosolic background					1.91293	645.163		Average cytosolic background					1.91293	105.403		Average cytosolic background				1.91293	373.843		Average cytosolic background
			2.01921	433.723		Average cytosolic background					2.01921	516.328		387.475					2.01921	534.6		298.459					2.01921	803.865		373.847					2.01921	64.8		100.774				2.01921	644.067		378.146
			2.12548	357.993		242.311					2.12548	330.47							2.12548	470.878							2.12548	1003.9							2.12548	44.898						2.12548	537.701
			2.23175	387.792							2.23175	468.387							2.23175	331.215							2.23175	492.121							2.23175	37.366						2.23175	306.589
			2.33803	331.931							2.33803	717.536							2.33803	206.849							2.33803	367.362							2.33803	30.755						2.33803	185.596
			2.4443	203.248							2.4443	645.786							2.4443	172.297							2.4443	602.397							2.4443	59.87						2.4443	164.033
			2.55058	207.13							2.55058	226.088							2.55058	151.413							2.55058	547.68							2.55058	91.259						2.55058	170.319
			2.65685	179.319							2.65685	38.856							2.65685	155.044							2.65685	399.745							2.65685	83.698						2.65685	312.653
			2.76312	125.241							2.76312	70.695							2.76312	152.474							2.76312	319.426							2.76312	21.778						2.76312	279.647
			2.8694	118.83							2.8694	285.89							2.8694	204.923							2.8694	465.408							2.8694	30.897						2.8694	240.519
			2.97567	186.953							2.97567	524.686							2.97567	265.33							2.97567	427.982							2.97567	44.263						2.97567	224.847
			3.08195	190.801							3.08195	470.082							3.08195	249.009							3.08195	275.688							3.08195	41.757						3.08195	203.815
			3.18822	187.069							3.18822	182.812							3.18822	222.867							3.18822	329.396							3.18822	92.482						3.18822	36.207
			3.29449	210.475							3.29449	2.563							3.29449	292.358							3.29449	450.309							3.29449	127.315						3.29449	12.7
			3.40077	183.78							3.40077	75.681							3.40077	199.014							3.40077	344.198							3.40077	103.361						3.40077	76.912
			3.50704	103.48							3.50704	249.111							3.50704	154.59							3.50704	442.014							3.50704	88.26						3.50704	76.49
			3.61332	99.173							3.61332	281.967							3.61332	340.222							3.61332	803.349							3.61332	35.08						3.61332	109.51
			3.71959	111.553							3.71959	176.204							3.71959	289.147							3.71959	914.6							3.71959	50.765						3.71959	238.278
			3.82586	105.622							3.82586	48.479							3.82586	152.671							3.82586	774.262							3.82586	78.582						3.82586	320.523
			3.93214	105.033							3.93214	206.098							3.93214	176.085							3.93214	538.122							3.93214	105.735						3.93214	163.776
			4.03841	110.418							4.03841	418.159							4.03841	260.8							4.03841	525.134							4.03841	114.2						4.03841	77.502
			4.14469	117.612							4.14469	456.945							4.14469	451.829							4.14469	445.688							4.14469	134.099						4.14469	95.663
			4.25096	114.272							4.25096	582.622							4.25096	474.343							4.25096	187.408							4.25096	166.994						4.25096	141.818
			4.35723	202.617							4.35723	446.809							4.35723	394.001							4.35723	15.384							4.35723	117.56						4.35723	212.468
			4.46351	272.804							4.46351	467.714							4.46351	257.527							4.46351	253.255							4.46351	78.312						4.46351	347.113
			4.56978	219.3							4.56978	738.712							4.56978	209.707							4.56978	571.33							4.56978	52.58						4.56978	279.616
			4.67606	175.397							4.67606	794.401							4.67606	280.75							4.67606	388.512							4.67606	45.874						4.67606	246.158
			4.78233	152.506							4.78233	377.064							4.78233	536.014							4.78233	31.514							4.78233	50.368						4.78233	373.617
			4.88861	150.392							4.88861	110.735							4.88861	836.512							4.88861	19.297							4.88861	60.429						4.88861	294.378
			4.99488	219.667							4.99488	379.25							4.99488	660.358							4.99488	52							4.99488	21.753						4.99488	204.444
			5.10115	330.674							5.10115	423.928							5.10115	297.081							5.10115	27.319							5.10115	29.057						5.10115	284.441
			5.20743	335.128							5.20743	384.673							5.20743	113.109							5.20743	9.375							5.20743	80.01						5.20743	316.64
			5.3137	291.511							5.3137	655.993							5.3137	132.695							5.3137	3.105							5.3137	67.349						5.3137	222.383
			5.41998	220.546							5.41998	827.241							5.41998	196.649							5.41998	3.638							5.41998	40.26						5.41998	171.474
			5.52625	215.199							5.52625	826.075							5.52625	162.282							5.52625	0.424							5.52625	41.818						5.52625	253.185
			5.63252	269.028							5.63252	544.168							5.63252	186.153							5.63252	4.811							5.63252	25.984						5.63252	320.674
			5.7388	247.274							5.7388	215.366							5.7388	352.736							5.7388	16.056							5.7388	60.43						5.7388	221.484
			5.84507	223.671							5.84507	80.956							5.84507	558.266							5.84507	152.43							5.84507	141.285						5.84507	206.319
			5.95135	200.078							5.95135	160.149							5.95135	560.46							5.95135	462.32							5.95135	177.088						5.95135	200.369
			6.05762	211.222							6.05762	185.028							6.05762	314							6.05762	636.357							6.05762	123.6						6.05762	194.839
			6.16389	221.095							6.16389	149.68							6.16389	227.905							6.16389	557.838							6.16389	156.904						6.16389	301.103
			6.27017	279.085							6.27017	166.88							6.27017	314.776							6.27017	558.028							6.27017	162.38						6.27017	358.145
			6.37644	363.369							6.37644	149.091							6.37644	292.706							6.37644	402.579							6.37644	75.983						6.37644	368.257
			6.48272	287.371							6.48272	293.776							6.48272	260.642							6.48272	331.881							6.48272	55.529						6.48272	479.897
			6.58899	273.794							6.58899	376.192							6.58899	203.633							6.58899	257.231							6.58899	69.942						6.58899	433.831
			6.69526	363.201							6.69526	406.216							6.69526	167.324							6.69526	316.116							6.69526	97.372						6.69526	340.386
			6.80154	326.686							6.80154	372.736							6.80154	156.575							6.80154	277.431							6.80154	108.23						6.80154	352.423
			6.90781	225.376							6.90781	234.71							6.90781	71.449							6.90781	164.645							6.90781	115.299						6.90781	373.617
			7.01409	153.87							7.01409	78.249							7.01409	89.649							7.01409	64.029							7.01409	123.827						7.01409	424.216
			7.12036	131.693							7.12036	69.796							7.12036	209.237							7.12036	27.364							7.12036	76.743						7.12036	456.417
			7.22663	183.383							7.22663	191.242							7.22663	256.106							7.22663	40.241							7.22663	43.424						7.22663	315.35
			7.33291	166.357							7.33291	211.768							7.33291	290.478							7.33291	81.115							7.33291	42.613						7.33291	466.52
			7.43918	104.553							7.43918	114.728							7.43918	502.299							7.43918	161.048							7.43918	142.831						7.43918	580.327
			7.54546	139.496							7.54546	376.419							7.54546	845.304							7.54546	473.995							7.54546	151.275						7.54546	1028.64
			7.65173	169.979							7.65173	542.994							7.65173	1136.5							7.65173	1025.71							7.65173	123.941						7.65173	1293.8
			7.758	143.596							7.758	469.178							7.758	763.98							7.758	1460.11							7.758	150.212						7.758	884.935
			7.86428	135.348							7.86428	236.773							7.86428	457.038							7.86428	1462.8							7.86428	156.325						7.86428	311.156
			7.97055	222.671							7.97055	142.878							7.97055	439.626							7.97055	1773.13							7.97055	191.186						7.97055	404.43
			8.07683	293.773							8.07683	224.036							8.07683	462.2							8.07683	1582.02							8.07683	130.6						8.07683	428.819
			8.1831	224.078							8.1831	220.848							8.1831	273.587							8.1831	964.125							8.1831	87.285						8.1831	521.733
			8.28937	189.511							8.28937	250.184							8.28937	305.289							8.28937	353.659							8.28937	73.524						8.28937	642.208
			8.39565	168.404							8.39565	526.372							8.39565	412.95							8.39565	206.443							8.39565	52.502						8.39565	642.296
			8.50192	201.929							8.50192	920.938							8.50192	373.055							8.50192	271.178							8.50192	74.089						8.50192	459.171
			8.6082	290.501							8.6082	1184.97							8.6082	269.769							8.6082	247.057							8.6082	143.802						8.6082	425.381
			8.71447	266.144							8.71447	630.403							8.71447	264.849							8.71447	91.453							8.71447	136.745						8.71447	431.335
			8.82074	294.298							8.82074	194.215							8.82074	197.396							8.82074	141.55							8.82074	100.734						8.82074	366.105
			8.92702	385.797							8.92702	242.353							8.92702	127.419							8.92702	213.968							8.92702	139.054						8.92702	346.225
			9.03329	383.861							9.03329	458.95							9.03329	137.845							9.03329	184.637							9.03329	127.698						9.03329	385.266
			9.13957	394.539							9.13957	634.947							9.13957	203.471							9.13957	51.854							9.13957	100.496						9.13957	533.262
			9.24584	482.388							9.24584	625.431							9.24584	281.193							9.24584	58.766							9.24584	57.704						9.24584	1517.36
			9.35211	435.586							9.35211	625.663							9.35211	227.497							9.35211	315.694							9.35211	125.934						9.35211	1608.05
			9.45839	607.284							9.45839	559.387							9.45839	170.401							9.45839	349.805							9.45839	179.92						9.45839	788.407
			9.56466	698.21							9.56466	363.118							9.56466	178.075							9.56466	121.539							9.56466	143.114						9.56466	353.54
			9.67094	459.163							9.67094	372.834							9.67094	163.818							9.67094	23.14							9.67094	112.667						9.67094	381.555
			9.77721	325.879							9.77721	552.902							9.77721	160.226							9.77721	60.962							9.77721	132.311						9.77721	342.489
			9.88348	304.021							9.88348	840.374							9.88348	77.43							9.88348	28.11							9.88348	201.402						9.88348	250.297
			9.98976	202.333							9.98976	972							9.98976	109.549							9.98976	34							9.98976	255.048						9.98976	439.333
																			10.096	180															10.096	443
			Rep 2
			CYRI-B GFP
		Image 1	Cell 1 middle bottom								Image 2	Cell 2 middle							Image 3	Cell 1 middle right						Image 3	Cell 2 middle							Image 4	Cell 1 middle bottom							Image 4	Cell 2 middle
			Length (um)	Intensity arpc2		Highest peak of arpC2	Ratio (%)					Length (um)	Intensity arpc2		Highest peak of arpC2	Ratio (%)				Length (um)	Intensity arpc2		Highest peak of arpC2	Ratio (%)			Length (um)	Intensity arpc2		Highest peak of arpC2	Ratio (%)				Length (um)	Intensity arpc2		Highest peak of arpC2	Ratio (%)				Length (um)	Intensity arpc2		Highest peak of arpC2	Ratio (%)
			0	161		1884.4	1.84269					0	1		1752.12	0.6213				0	100.5		3384.08	4.81114			0	98		3169.77	3.2864				0	61.111		866.29	1.48539				0	37		2792.19	11.2253
			0.10627	411.484								0.10627	28.058							0.10627	448.745						0.10627	132.234							0.10627	112.999							0.10627	3.974
			0.21255	932.152								0.21255	87.283							0.21255	1185.89						0.21255	137.925							0.21255	240.105							0.21255	6.084
			0.31882	1251.29								0.31882	190.025							0.31882	2119.28						0.31882	369.359							0.31882	375.175							0.31882	59.382
			0.4251	1125.72								0.4251	605.574							0.4251	3015.99						0.4251	1213.83							0.4251	630.669							0.4251	445.112
			0.53137	1420.37								0.53137	1484.2							0.53137	3384.08						0.53137	2862.05							0.53137	810.614							0.53137	1404.27
			0.63764	1522.11								0.63764	1752.12							0.63764	3317.45						0.63764	3169.77							0.63764	866.29							0.63764	2702.35
			0.74392	1756.66								0.74392	1562.05							0.74392	2994.42						0.74392	2896.55							0.74392	777.005							0.74392	2792.19
			0.85019	1884.4								0.85019	1269.88							0.85019	1680.61						0.85019	3090.15							0.85019	627.98							0.85019	2149.55
			0.95647	1370.91								0.95647	1094.65							0.95647	1222.99						0.95647	2691.12							0.95647	599.917							0.95647	1850.88
			1.06274	1177.16								1.06274	893.266							1.06274	1025.87						1.06274	2208.45							1.06274	407.861							1.06274	1903.24
			1.16901	1233.54								1.16901	1017.05							1.16901	856.265						1.16901	1719.74							1.16901	249.06							1.16901	1608.43
			1.27529	905.981								1.27529	794.088							1.27529	1190.29						1.27529	1545.06							1.27529	243.099							1.27529	834.823
			1.38156	1109.75								1.38156	749.308							1.38156	1287.16						1.38156	1761.57							1.38156	332.113							1.38156	228.123
			1.48784	1063.18								1.48784	960.229							1.48784	1172.54						1.48784	1777.53							1.48784	514.151							1.48784	112.129
			1.59411	591.393								1.59411	1142.64							1.59411	858.679						1.59411	1609.08							1.59411	409.355							1.59411	42.465
			1.70038	452.56								1.70038	786.032							1.70038	631.658						1.70038	1405.99							1.70038	451.651							1.70038	146.724
			1.80666	457.989								1.80666	562.874							1.80666	460.639						1.80666	1426.62							1.80666	359.274							1.80666	177.638
			1.91293	652.08		Average cytosolic background						1.91293	208.464		Average cytosolic background					1.91293	482.828		Average cytosolic background				1.91293	1412.98		Average cytosolic background					1.91293	554.611		Average cytosolic background					1.91293	148.428		Average cytosolic background
			2.01921	964.707		1022.64						2.01921	421.529		2820.08					2.01921	563.2		703.385				2.01921	1291.1		964.512					2.01921	592.947		583.207					2.01921	65.04		248.74
			2.12548	961.252								2.12548	743.341							2.12548	500.859						2.12548	1163.57							2.12548	418.662							2.12548	105.316
			2.23175	1302.85								2.23175	885.955							2.23175	525.324						2.23175	1135.16							2.23175	265.582							2.23175	121.595
			2.33803	1385.87								2.33803	1016.43							2.33803	684.894						2.33803	1929.75							2.33803	232.293							2.33803	124.559
			2.4443	1202.09								2.4443	1370.16							2.4443	613.512						2.4443	3364.07							2.4443	255.109							2.4443	219.629
			2.55058	1080.59								2.55058	1211.73							2.55058	456.171						2.55058	3470.85							2.55058	381.446							2.55058	403.637
			2.65685	1333.82								2.65685	996.648							2.65685	549.036						2.65685	2008.43							2.65685	459.513							2.65685	495.493
			2.76312	1416.64								2.76312	922.718							2.76312	889.314						2.76312	733.384							2.76312	468.223							2.76312	328.037
			2.8694	1304.58								2.8694	633.957							2.8694	1054.36						2.8694	262.262							2.8694	288.953							2.8694	43.036
			2.97567	1182.61								2.97567	442.734							2.97567	1002.02						2.97567	241.049							2.97567	163.451							2.97567	19.043
			3.08195	1073.75								3.08195	350.832							3.08195	785.386						3.08195	388.204							3.08195	207.562							3.08195	74.624
			3.18822	793.171								3.18822	875.641							3.18822	783.985						3.18822	637.753							3.18822	371.26							3.18822	50.44
			3.29449	606.339								3.29449	1746.6							3.29449	1056.58						3.29449	754.407							3.29449	366.67							3.29449	53.338
			3.40077	1071.78								3.40077	1963.28							3.40077	930.335						3.40077	928.024							3.40077	232.663							3.40077	56.18
			3.50704	1680.92								3.50704	1228.29							3.50704	950.819						3.50704	1578.3							3.50704	458.752							3.50704	34.358
			3.61332	1186.53								3.61332	1946.02							3.61332	991.369						3.61332	2110.72							3.61332	957.801							3.61332	104.534
			3.71959	868.605								3.71959	2280.08							3.71959	752.161						3.71959	1757.35							3.71959	1097.38							3.71959	156.723
			3.82586	871.704								3.82586	1805.03							3.82586	658.516						3.82586	1066.8							3.82586	912.537							3.82586	79.889
			3.93214	811.702								3.93214	1500.79							3.93214	566.669						3.93214	829.264							3.93214	936.353							3.93214	28.857
			4.03841	990.883								4.03841	1399.52							4.03841	382.9						4.03841	1118.6							4.03841	1322.67							4.03841	32.16
			4.14469	1034.14								4.14469	1386.5							4.14469	284.752						4.14469	1234.47							4.14469	1304.85							4.14469	100.926
			4.25096	1150.29								4.25096	729.144							4.25096	235.576						4.25096	704.931							4.25096	1088.06							4.25096	281.925
			4.35723	945.077								4.35723	395.267							4.35723	146.136						4.35723	261.561							4.35723	717.108							4.35723	533.318
			4.46351	835.844								4.46351	496.031							4.46351	200.64						4.46351	410.416							4.46351	521.132							4.46351	484.061
			4.56978	1021.16								4.56978	657.113							4.56978	244.363						4.56978	701.014							4.56978	629.939							4.56978	146.858
			4.67606	1036.48								4.67606	678.886							4.67606	455.001						4.67606	1027.46							4.67606	893.605							4.67606	179.156
			4.78233	957.548								4.78233	725.312							4.78233	966.97						4.78233	1186.77							4.78233	1250.79							4.78233	177.252
			4.88861	1251.35								4.88861	1222.97							4.88861	1598.93						4.88861	1133.27							4.88861	1306.94							4.88861	110.248
			4.99488	1319.12								4.99488	1757							4.99488	1179.86						4.99488	988.26							4.99488	954.597							4.99488	238.844
			5.10115	1469.25								5.10115	1470.27							5.10115	774.957						5.10115	676.155							5.10115	622.011							5.10115	321.676
			5.20743	1720.65								5.20743	873.511							5.20743	642.606						5.20743	623.784							5.20743	401.272							5.20743	252.646
			5.3137	1690.51								5.3137	1036.77							5.3137	549.801						5.3137	716.017							5.3137	494.195							5.3137	557.72
			5.41998	1268.67								5.41998	1559.57							5.41998	561.014						5.41998	915.881							5.41998	675.449							5.41998	631.703
			5.52625	996.435								5.52625	1710.52							5.52625	526.067						5.52625	1138.12							5.52625	676.317							5.52625	265.178
			5.63252	857.806								5.63252	2086.43							5.63252	272.043						5.63252	1052.94							5.63252	565.018							5.63252	165.624
			5.7388	698.52								5.7388	2712.85							5.7388	280.743						5.7388	967.658							5.7388	480.965							5.7388	247.68
			5.84507	931.136								5.84507	2113.75							5.84507	404.216						5.84507	941.873							5.84507	332.355							5.84507	291.175
			5.95135	1245.84								5.95135	2541.36							5.95135	585.342						5.95135	789.014							5.95135	358.176							5.95135	210.596
			6.05762	1271.49								6.05762	3200.43							6.05762	457.6						6.05762	392.2							6.05762	490.258							6.05762	175.72
			6.16389	1247.63								6.16389	2717.75							6.16389	380.504						6.16389	173.397							6.16389	289.607							6.16389	252.919
			6.27017	967.553								6.27017	2552.42							6.27017	350.418						6.27017	504.795							6.27017	416.535							6.27017	281.156
			6.37644	926.846								6.37644	3862.6							6.37644	335.522						6.37644	1055.42							6.37644	600.319							6.37644	252.839
			6.48272	1322.92								6.48272	5285.2							6.48272	382.286						6.48272	1065.38							6.48272	735.689							6.48272	230.13
			6.58899	1414.94								6.58899	6704.89							6.58899	1086.64						6.58899	937.045							6.58899	813.748							6.58899	71.918
			6.69526	1404.73								6.69526	8273.01							6.69526	1210.02						6.69526	2056.48							6.69526	1010.16							6.69526	31.136
			6.80154	1323.3								6.80154	8396.15							6.80154	1667.24						6.80154	2686.22							6.80154	1061.7							6.80154	116.707
			6.90781	844.606								6.90781	6830.39							6.90781	1587.81						6.90781	1586.25							6.90781	928.074							6.90781	83.427
			7.01409	766.409								7.01409	4122.25							7.01409	1365.36						7.01409	458.639							7.01409	607.595							7.01409	54.62
			7.12036	1033.03								7.12036	2126.02							7.12036	1272.7						7.12036	132.827							7.12036	422.517							7.12036	102.263
			7.22663	1210.25								7.22663	1851.44							7.22663	1155.83						7.22663	109.519							7.22663	387.278							7.22663	54.204
			7.33291	1173.57								7.33291	1941.14							7.33291	1166.15						7.33291	289.358							7.33291	279.894							7.33291	65.331
			7.43918	1099.92								7.43918	2367.09							7.43918	1250.16						7.43918	538.795							7.43918	276.116							7.43918	79.404
			7.54546	1085.76								7.54546	3109.66							7.54546	1028.4						7.54546	573.917							7.54546	323.789							7.54546	39.892
			7.65173	1027.86								7.65173	4592.11							7.65173	581.84						7.65173	454.737							7.65173	379.319							7.65173	14.603
			7.758	1137.04								7.758	4139.24							7.758	363.648						7.758	245.566							7.758	363.556							7.758	94.895
			7.86428	1016.95								7.86428	6028							7.86428	486.525						7.86428	98.991							7.86428	232.453							7.86428	212.08
			7.97055	947.696								7.97055	6842.68							7.97055	660.136						7.97055	105.284							7.97055	206.938							7.97055	464.59
			8.07683	964.971								8.07683	6435.18							8.07683	426.2						8.07683	369.6							8.07683	282.053							8.07683	532.32
			8.1831	968.586								8.1831	5954.2							8.1831	270.986						8.1831	725.01							8.1831	379.241							8.1831	592.326
			8.28937	1048.14								8.28937	7268.41							8.28937	299.817						8.28937	745.104							8.28937	479.82							8.28937	551.435
			8.39565	807.42								8.39565	7249.58							8.39565	439.201						8.39565	758.212							8.39565	629.119							8.39565	349.546
			8.50192	756.211								8.50192	6732.19							8.50192	356.712						8.50192	721.573							8.50192	409.64							8.50192	296.695
			8.6082	954.63								8.6082	5439.52							8.6082	461.645						8.6082	659.334							8.6082	255.618							8.6082	263.82
			8.71447	1029.21								8.71447	3317.55							8.71447	701.509						8.71447	1077.62							8.71447	192.531							8.71447	195.832
			8.82074	803.37								8.82074	2124.38							8.82074	873.302						8.82074	1925.77							8.82074	267.073							8.82074	134.47
			8.92702	444.608								8.92702	2451.83							8.92702	1070.02						8.92702	2164.86							8.92702	481.197							8.92702	93.549
			9.03329	478.062								9.03329	2615.56							9.03329	1001.02						9.03329	1420.44							9.03329	580.69							9.03329	312.54
			9.13957	513.517								9.13957	2195.84							9.13957	784.293						9.13957	700.088							9.13957	803.689							9.13957	665.791
			9.24584	504.593								9.24584	1708.74							9.24584	692.228						9.24584	877.083							9.24584	794.882							9.24584	775.679
			9.35211	607.917								9.35211	1385.37							9.35211	685.605						9.35211	1474.87							9.35211	1000.02							9.35211	625.686
			9.45839	746.743								9.45839	1908.63							9.45839	848.84						9.45839	1308.48							9.45839	838.147							9.45839	440.298
			9.56466	769.969								9.56466	2327.83							9.56466	683.569						9.56466	827.186							9.56466	622.016							9.56466	459
			9.67094	532.413								9.67094	2881.78							9.67094	699.997						9.67094	733.954							9.67094	710.639							9.67094	532.575
			9.77721	753.266								9.77721	5077.86							9.77721	607.408						9.77721	599.835							9.77721	578.213							9.77721	578.309
			9.88348	641.078								9.88348	6515.63							9.88348	529.001						9.88348	462.322							9.88348	566.222							9.88348	400.18
			9.98976	595								9.98976	5500.5							9.98976	515.92						9.98976	656.733							9.98976	724.045							9.98976	273.353
																				10.096	678						10.096	682.5							10.096	833.667							10.096	425
[truncated: 17 more columns]

## Sheet: Sheet3
	Arpc2 intensity at the leading edge
			Rep 3
			GFP
		Image 1	Cell 1 bottom							Image 1	Cell 2 top left						Image 1	Cell 3 top right							Image 2	Cell 1 top right							Image 2	Cell 2 middle bottom							Image 2	Cell 3 bottom left							Image 3
			Length (um)	Intensity arpc2		Highest peak of arpC2	Ratio (%)				Length (um)	Intensity arpc2		Highest peak of arpC2	Ratio (%)			Length (um)	Intensity arpc2		Highest peak of arpC2	Ratio (%)				Length (um)	Intensity arpc2		Highest peak of arpC2	Ratio (%)				Length (um)	Intensity arpc2		Highest peak of arpC2	Ratio (%)				Length (um)	Intensity arpc2		Highest peak of arpC2	Ratio (%)
			0	12		2292.3	2.97828				0	301.333		6207.09	8.19488			0	81		2992.55	8.3223				0	10		2636.8	5.68265				0	28		3411.12	4.37038				0	68		2762.63	3.27412
			0.10627	119.566							0.10627	179.949						0.10627	452.619							0.10627	6.893							0.10627	385.559							0.10627	150.241
			0.21255	973.841							0.21255	875.278						0.21255	1080.99							0.21255	0.854							0.21255	1408.1							0.21255	216.95
			0.31882	1916.6							0.31882	2889.94						0.31882	2447.65							0.31882	1.69							0.31882	2411.12							0.31882	701.645
			0.4251	2292.3							0.4251	5357.33						0.4251	2992.55							0.4251	17.432							0.4251	3149.26							0.4251	1866.69
			0.53137	1980.65							0.53137	6207.09						0.53137	2511.33							0.53137	59.934							0.53137	3411.12							0.53137	2762.63
			0.63764	1956.12							0.63764	4364.21						0.63764	1581.1							0.63764	132.232							0.63764	2739.47							0.63764	2552.25
			0.74392	2098.31							0.74392	2409.67						0.74392	1020.39							0.74392	317.571							0.74392	1733.93							0.74392	1186.98
			0.85019	1756.94							0.85019	1511.25						0.85019	707.604							0.85019	840.549							0.85019	928.453							0.85019	732.433
			0.95647	1435.64							0.95647	1147.51						0.95647	566.259							0.95647	2043.74							0.95647	284.296							0.95647	824.007
			1.06274	981.551							1.06274	1101.44						1.06274	428.017							1.06274	2636.8							1.06274	365.188							1.06274	409.071
			1.16901	917.148							1.16901	1130.06						1.16901	300.246							1.16901	1803.76							1.16901	424.482							1.16901	319.099
			1.27529	775.309							1.27529	936.189						1.27529	294.584							1.27529	629.453							1.27529	330.709							1.27529	536.979
			1.38156	671.755							1.38156	837.439						1.38156	229.497							1.38156	305.966							1.38156	336.984							1.38156	453.454
			1.48784	710.728							1.48784	611.605						1.48784	156.598							1.48784	190.096							1.48784	375.454							1.48784	441.121
			1.59411	1012.15							1.59411	434.998						1.59411	170.04							1.59411	127.166							1.59411	570.388							1.59411	603.021
			1.70038	875.671							1.70038	400.471						1.70038	393.761							1.70038	157.811							1.70038	660.483							1.70038	776.433
			1.80666	912.03							1.80666	565.095						1.80666	314.323							1.80666	254.843							1.80666	469.436							1.80666	885.61
			1.91293	673.215							1.91293	522.211						1.91293	267.131							1.91293	256.475							1.91293	512.078							1.91293	846.78
			2.01921	378.32		Average cytosolic background					2.01921	617.778		Average cytosolic background				2.01921	241.192		Average cytosolic background					2.01921	323.4		Average cytosolic background					2.01921	959.88		Average cytosolic background					2.01921	387.823		Average cytosolic background
			2.12548	446.163		769.674					2.12548	912.429		757.435				2.12548	211.036		359.583					2.12548	438.352		464.009					2.12548	1635.17		780.508					2.12548	550.943		843.777
			2.23175	547.327							2.23175	756.457						2.23175	214.699							2.23175	527.335							2.23175	1442.44							2.23175	1192.96
			2.33803	549.913							2.33803	873.679						2.33803	268.186							2.33803	468.647							2.33803	1027.4							2.33803	1577.37
			2.4443	543.173							2.4443	1140.43						2.4443	182.975							2.4443	382.643							2.4443	804.526							2.4443	1803.4
			2.55058	479.054							2.55058	1165.07						2.55058	149.215							2.55058	325.161							2.55058	690.175							2.55058	2220.3
			2.65685	420.717							2.65685	1074.31						2.65685	190.856							2.65685	336.765							2.65685	411.307							2.65685	1945.95
			2.76312	564.109							2.76312	1026.88						2.76312	198.52							2.76312	193.904							2.76312	448.939							2.76312	1492.17
			2.8694	666.267							2.8694	1407.01						2.8694	182.237							2.8694	229.948							2.8694	447.059							2.8694	1319.83
			2.97567	777.081							2.97567	2162.85						2.97567	214.132							2.97567	261.495							2.97567	576.39							2.97567	1266.77
			3.08195	704.798							3.08195	2357.28						3.08195	231.933							3.08195	181.24							3.08195	512.113							3.08195	1462.62
			3.18822	592.271							3.18822	1744.5						3.18822	258.704							3.18822	180.039							3.18822	443.626							3.18822	1654.92
			3.29449	451.01							3.29449	837.495						3.29449	245.969							3.29449	540.678							3.29449	551.281							3.29449	1716.12
			3.40077	453.665							3.40077	352.302						3.40077	220.53							3.40077	1023.3							3.40077	401.57							3.40077	1272.47
			3.50704	475.777							3.50704	322.728						3.50704	294.185							3.50704	1181.91							3.50704	315.512							3.50704	1238.6
			3.61332	437.041							3.61332	359.11						3.61332	260.362							3.61332	999.9							3.61332	518.824							3.61332	1234.53
			3.71959	677.97							3.71959	562.331						3.71959	159.606							3.71959	667.105							3.71959	976.174							3.71959	1373.84
			3.82586	807.485							3.82586	718.305						3.82586	210.719							3.82586	535.462							3.82586	1400.92							3.82586	1689.9
			3.93214	739.078							3.93214	757.36						3.93214	194.561							3.93214	414.522							3.93214	1597.68							3.93214	1207.57
			4.03841	560.16							4.03841	748.822						4.03841	183.284							4.03841	285.6							4.03841	1769.24							4.03841	1045.02
			4.14469	699.174							4.14469	576.362						4.14469	228.801							4.14469	341.814							4.14469	1267.42							4.14469	1313.17
			4.25096	941.776							4.25096	375.698						4.25096	208.465							4.25096	377.116							4.25096	910.26							4.25096	1449.65
			4.35723	780.316							4.35723	283.568						4.35723	291.891							4.35723	410.307							4.35723	1298.21							4.35723	1198.14
			4.46351	405.895							4.46351	386.261						4.46351	204.997							4.46351	337.084							4.46351	1743.41							4.46351	885.078
			4.56978	377.057							4.56978	572.493						4.56978	278.755							4.56978	234.654							4.56978	1455.85							4.56978	881.326
			4.67606	390.593							4.67606	796.895						4.67606	294.188							4.67606	400.592							4.67606	1330.74							4.67606	833.064
			4.78233	682.59							4.78233	743.755						4.78233	253.437							4.78233	306.283							4.78233	1110.43							4.78233	603.064
			4.88861	490.193							4.88861	395.381						4.88861	207.258							4.88861	354.618							4.88861	1116.21							4.88861	626.674
			4.99488	373.597							4.99488	383.33						4.99488	227.75							4.99488	290.262							4.99488	869.394							4.99488	533.667
			5.10115	474.232							5.10115	393.551						5.10115	233.494							5.10115	253.688							5.10115	499.622							5.10115	892.504
			5.20743	470.75							5.20743	749.989						5.20743	193.488							5.20743	281.84							5.20743	556.681							5.20743	835.028
			5.3137	298.03							5.3137	649.199						5.3137	171.309							5.3137	359.413							5.3137	880.069							5.3137	665.461
			5.41998	240.986							5.41998	515.415						5.41998	115.845							5.41998	257.148							5.41998	894.825							5.41998	852.184
			5.52625	560.281							5.52625	360.788						5.52625	115.66							5.52625	208.868							5.52625	891.961							5.52625	837.482
			5.63252	597.085							5.63252	293.7						5.63252	62.459							5.63252	208.895							5.63252	886.268							5.63252	943.638
			5.7388	558.846							5.7388	209.949						5.7388	115.603							5.7388	282.85							5.7388	1019.42							5.7388	1068.35
			5.84507	574.598							5.84507	271.836						5.84507	310.945							5.84507	340.576							5.84507	918.571							5.84507	936.426
			5.95135	720.603							5.95135	228.428						5.95135	328.059							5.95135	303.275							5.95135	879.47							5.95135	844.922
			6.05762	748.56							6.05762	270.933						6.05762	305.89							6.05762	329.8							6.05762	1013.08							6.05762	1091.63
			6.16389	1083.29							6.16389	403.944						6.16389	262.071							6.16389	369.913							6.16389	927.461							6.16389	1126.23
			6.27017	945.209							6.27017	687.647						6.27017	143.059							6.27017	384.232							6.27017	1004.12							6.27017	767.355
			6.37644	677.485							6.37644	928.3						6.37644	221.254							6.37644	238.535							6.37644	1068.62							6.37644	893.241
			6.48272	703.813							6.48272	668.852						6.48272	174.307							6.48272	211.807							6.48272	1034.9							6.48272	995.085
			6.58899	777.549							6.58899	923.919						6.58899	110.044							6.58899	373.579							6.58899	1317.71							6.58899	930.66
			6.69526	782.294							6.69526	686.514						6.69526	223.397							6.69526	313.28							6.69526	1580.98							6.69526	951.702
			6.80154	767.258							6.80154	642.859						6.80154	280.939							6.80154	359.714							6.80154	1211.12							6.80154	915.95
			6.90781	840.524							6.90781	670.746						6.90781	271.081							6.90781	238.296							6.90781	769.892							6.90781	703.404
			7.01409	829.3							7.01409	767.998						7.01409	193.81							7.01409	194.581							7.01409	691.406							7.01409	764.27
			7.12036	887.097							7.12036	430.362						7.12036	256.789							7.12036	184.207							7.12036	671.204							7.12036	783.383
			7.22663	650.045							7.22663	358.018						7.22663	316.546							7.22663	192.24							7.22663	563.697							7.22663	900.702
			7.33291	690.647							7.33291	528.019						7.33291	484.426							7.33291	215.448							7.33291	456.085							7.33291	626.142
			7.43918	750.645							7.43918	523.268						7.43918	499.419							7.43918	476.546							7.43918	678.609							7.43918	434.645
			7.54546	499.934							7.54546	637.286						7.54546	418.291							7.54546	664.148							7.54546	682.124							7.54546	596.574
			7.65173	778.183							7.65173	731.519						7.65173	412.904							7.65173	640.253							7.65173	661.553							7.65173	585.199
			7.758	1052.14							7.758	817.473						7.758	312.313							7.758	542.183							7.758	413.79							7.758	608.078
			7.86428	881.56							7.86428	870.484						7.86428	260.332							7.86428	462.82							7.86428	377.601							7.86428	567.248
			7.97055	779.042							7.97055	655.299						7.97055	489.084							7.97055	555.803							7.97055	611.881							7.97055	494.688
			8.07683	734.04							8.07683	765.711						8.07683	533.539							8.07683	673.8							8.07683	976.96							8.07683	389.511
			8.1831	742.856							8.1831	878.837						8.1831	444.449							8.1831	739.122							8.1831	1140.5							8.1831	348.17
			8.28937	1105.72							8.28937	869.383						8.28937	409.441							8.28937	494.545							8.28937	695.047							8.28937	290.433
			8.39565	1302.63							8.39565	896.64						8.39565	416.689							8.39565	481.255							8.39565	444.751							8.39565	247.787
			8.50192	945.402							8.50192	950.829						8.50192	479.882							8.50192	725.219							8.50192	345.648							8.50192	390.355
			8.6082	1155.85							8.6082	765.35						8.6082	500.943							8.6082	738.715							8.6082	424.771							8.6082	307.645
			8.71447	1196.45							8.71447	559.535						8.71447	380.169							8.71447	1063.15							8.71447	366.704							8.71447	201.518
			8.82074	1086.08							8.82074	624.148						8.82074	311.312							8.82074	1457.68							8.82074	221.963							8.82074	234.291
			8.92702	1276.28							8.92702	587.72						8.92702	291.719							8.92702	980.931							8.92702	204.074							8.92702	269.73
			9.03329	1467.19							9.03329	667.127						9.03329	413.14							9.03329	543.853							9.03329	316.551							9.03329	200.539
			9.13957	1313.5							9.13957	1064.54						9.13957	488.559							9.13957	465.019							9.13957	539.145							9.13957	119.355
			9.24584	955.754							9.24584	1225.29						9.24584	528.728							9.24584	521.017							9.24584	427.697							9.24584	181.773
			9.35211	1002.45							9.35211	882.688						9.35211	622.894							9.35211	597.49							9.35211	504.816							9.35211	183.582
			9.45839	1315.35							9.45839	807.625						9.45839	925.693							9.45839	711.536							9.45839	528.266							9.45839	261.553
			9.56466	1332.79							9.56466	1122.65						9.56466	1209.37							9.56466	587.161							9.56466	464.535							9.56466	276.241
			9.67094	1166.63							9.67094	1283.49						9.67094	1513.01							9.67094	428.014							9.67094	330.263							9.67094	310.887
			9.77721	1319.11							9.77721	1170.01						9.77721	1309.91							9.77721	373.133							9.77721	255.791							9.77721	295.085
			9.88348	1358.79							9.88348	960.382						9.88348	1328.68							9.88348	657.802							9.88348	368.341							9.88348	338.184
			9.98976	1294.48							9.98976	807.364						9.98976	1310.5							9.98976	792.562							9.98976	351.753							9.98976	235.333
			10.096	1464							10.096	1006.33														10.096	562							10.096	176
				CYRI-B GFP
																			Image 1	Cell 3 middle far top
			Image 1	Cell 1 middle bottom						Image 1	Cell 2 middle top								Length (um)	Intensity arpc2		Highest peak of arpC2	Ratio (%)					Image 2	Cell 1 bottom left						Image 2	Cell 2 bottom right							Image 2	Cell 2 middle right
				Length (um)	Intensity arpc2		Highest peak of arpC2	Ratio (%)			Length (um)	Intensity arpc2		Highest peak of arpC2	Ratio (%)				0	120		2623.52	1.99103					Length (um)	Intensity arpc2		Highest peak of arpC2	Ratio (%)			Length (um)	Intensity arpc2		Highest peak of arpC2	Ratio (%)				Length (um)	Intensity arpc2		Highest peak of arpC2	Ratio (%)
																			0.10627	105.249
				0	33.778		4490.78	2.73955			0	175.5		2009.45	0.481621				0.21255	309.096								0	43		3501	1.65611			0	2		5886.23	4.02562				0	5.889		3276.18	1.61047
				0.10627	67.018						0.10627	663.455							0.31882	625.992								0.10627	3.789						0.10627	23.219							0.10627	20.884
				0.21255	75.685						0.21255	1507.38							0.4251	838.74								0.21255	399.016						0.21255	108.909							0.21255	18.367
				0.31882	147.117						0.31882	1681.8							0.53137	1438.58								0.31882	677.379						0.31882	65.099							0.31882	30.18
				0.4251	223.146						0.4251	2009.45							0.63764	2302.26								0.4251	668.252						0.4251	1393.35							0.4251	149.158
				0.53137	389.377						0.53137	1824.63							0.74392	2623.52								0.53137	407.843						0.53137	4048.11							0.53137	1059.87
				0.63764	1243.37						0.63764	1561.95							0.85019	2618.07								0.63764	1290.06						0.63764	5886.23							0.63764	2272.49
				0.74392	3248.03						0.74392	1641.91							0.95647	2017.65								0.74392	2066.54						0.74392	3966.01							0.74392	3006.16
				0.85019	4490.78						0.85019	1765.35							1.06274	1612.03								0.85019	2057.81						0.85019	1748.4							0.85019	3276.18
				0.95647	3357.68						0.95647	1830.93							1.16901	1078.36								0.95647	2136.52						0.95647	1215.45							0.95647	2624.08
				1.06274	1550.83						1.06274	1175.18							1.27529	859.237								1.06274	2413.09						1.06274	1140.94							1.06274	2043.26
				1.16901	489.703						1.16901	737.234							1.38156	488.855								1.16901	2544.11						1.16901	1371.19							1.16901	1287.94
				1.27529	268.724						1.27529	881.909							1.48784	676.23								1.27529	2439.18						1.27529	1551.39							1.27529	940.913
				1.38156	484.728						1.38156	1191.58							1.59411	592.856								1.38156	2900.72						1.38156	957.451							1.38156	582.663
				1.48784	604.775						1.48784	972.137							1.70038	326.247								1.48784	3173.13						1.48784	1170.97							1.48784	704.791
				1.59411	788.989						1.59411	764.658							1.80666	175.51								1.59411	3501						1.59411	1735.85							1.59411	613.865
				1.70038	808.384						1.70038	899.169							1.91293	201.713								1.70038	2984.78						1.70038	1537.79							1.70038	556.853
				1.80666	307.859						1.80666	928.551							2.01921	360.96		Average cytosolic background						1.80666	2488.6						1.80666	1995.53							1.80666	493.503
				1.91293	212.16						1.91293	944.642							2.12548	709.956		1317.67						1.91293	2321.02						1.91293	3000.57							1.91293	424.975
				2.01921	498.801		Average cytosolic background				2.01921	1222.81		Average cytosolic background					2.23175	694.408								2.01921	1981.63		Average cytosolic background				2.01921	3746.57		Average cytosolic background					2.01921	569.2		Average cytosolic background
				2.12548	587.586		1639.24				2.12548	1161.68		4172.26					2.33803	527.54								2.12548	1345.34		2113.99				2.12548	2488.65		1462.19					2.12548	490.187		2034.3
				2.23175	426.227						2.23175	1257.33							2.4443	863.758								2.23175	1210.94						2.23175	1728.79							2.23175	405.408
				2.33803	366.066						2.33803	1559.85							2.55058	748.681								2.33803	1363.81						2.33803	1471.04							2.33803	351.263
				2.4443	329.128						2.4443	2410.93							2.65685	582.719								2.4443	1421						2.4443	1770.71							2.4443	393.633
				2.55058	350.79						2.55058	2800.89							2.76312	518.563								2.55058	1626.5						2.55058	2038.34							2.55058	330.687
				2.65685	475.281						2.65685	2085.68							2.8694	494.354								2.65685	1979.07						2.65685	1912.3							2.65685	269.263
				2.76312	619.25						2.76312	1584.88							2.97567	764.445								2.76312	2376.17						2.76312	2201.33							2.76312	298.706
				2.8694	661.609						2.8694	1734.01							3.08195	1104.62								2.8694	2805.15						2.8694	1914.59							2.8694	451.457
				2.97567	891.064						2.97567	1911.9							3.18822	1209.68								2.97567	2368.28						2.97567	1529.6							2.97567	434.895
				3.08195	1701.2						3.08195	1467.17							3.29449	1006.76								3.08195	1742.34						3.08195	1623.52							3.08195	341.447
				3.18822	2532.63						3.18822	1438.01							3.40077	623.986								3.18822	1262.24						3.18822	1382.62							3.18822	491.064
				3.29449	2745.01						3.29449	1810.17							3.50704	656.309								3.29449	1893.75						3.29449	1321.7							3.29449	514.326
				3.40077	2374.43						3.40077	1821.44							3.61332	534.835								3.40077	1883						3.40077	1425.42							3.40077	665.786
				3.50704	1588.66						3.50704	2119.8							3.71959	382.041								3.50704	1799.86						3.50704	2467.28							3.50704	889.571
				3.61332	1127.1						3.61332	3597.54							3.82586	630.344								3.61332	2031.95						3.61332	3475.64							3.61332	823.189
				3.71959	1045.72						3.71959	4424.99							3.93214	999.59								3.71959	2158.44						3.71959	3776.15							3.71959	880.719
				3.82586	1286.46						3.82586	3942.24							4.03841	1247.11								3.82586	2060.54						3.82586	4696.99							3.82586	1267.99
				3.93214	1499						3.93214	3447.83							4.14469	1374.79								3.93214	2238.41						3.93214	4787.04							3.93214	1187.32
				4.03841	1230.44						4.03841	3177.1							4.25096	1226.78								4.03841	2391.3						4.03841	3883.21							4.03841	1509.98
				4.14469	1080.58						4.14469	3401.5							4.35723	1206.91								4.14469	3390.12						4.14469	3288.03							4.14469	1615.09
				4.25096	1592.51						4.25096	3774.34							4.46351	890.159								4.25096	4185.27						4.25096	2636.7							4.25096	1664.79
				4.35723	2008.02						4.35723	3609.77							4.56978	622.73								4.35723	3512.18						4.35723	2830.28							4.35723	1797.19
				4.46351	1945.9						4.46351	3492.29							4.67606	840.755								4.46351	2795.99						4.46351	2913.97							4.46351	1779.56
				4.56978	1926.58						4.56978	3801.28							4.78233	1163.38								4.56978	2638.31						4.56978	2595.56							4.56978	1799.17
				4.67606	1866.75						4.67606	4188.69							4.88861	1192.18								4.67606	2921.84						4.67606	1766.56							4.67606	2112.01
				4.78233	1822.2						4.78233	4108.43							4.99488	1115.62								4.78233	3050.12						4.78233	1866.05							4.78233	3035.05
				4.88861	1821.57						4.88861	3253.87							5.10115	1047.89								4.88861	2625.37						4.88861	2805.34							4.88861	3353.28
				4.99488	1517.67						4.99488	2546.62							5.20743	774.336								4.99488	2884.5						4.99488	2500.67							4.99488	2808.45
				5.10115	1577.86						5.10115	3236.23							5.3137	973.433								5.10115	3045.78						5.10115	2017.1							5.10115	2162.72
				5.20743	1347.99						5.20743	4246.16							5.41998	1503.36								5.20743	2768.49						5.20743	2775.3							5.20743	1949.37
				5.3137	1153.05						5.3137	4356.2							5.52625	1793.55								5.3137	2217.17						5.3137	2585.48							5.3137	1757.36
				5.41998	1353.1						5.41998	4452.9							5.63252	1441.26								5.41998	2175.16						5.41998	2194.89							5.41998	1749.91
				5.52625	1355.4						5.52625	4602.19							5.7388	1113.71								5.52625	2585.71						5.52625	1767.68							5.52625	2132.74
				5.63252	731.583						5.63252	4099.59							5.84507	1217.68								5.63252	2960.72						5.63252	1464.7							5.63252	2347.32
				5.7388	648.865						5.7388	3744.7							5.95135	1235.35								5.7388	2953.9						5.7388	1236.15							5.7388	2085.62
				5.84507	924.218						5.84507	4843.55							6.05762	1274.6								5.84507	3069.18						5.84507	1173.74							5.84507	1943.16
				5.95135	999.43						5.95135	4923.97							6.16389	1384.45								5.95135	3724.56						5.95135	1246.45							5.95135	1785.15
				6.05762	1396.35						6.05762	4546.16							6.27017	1640.58								6.05762	3618.48						6.05762	1142.18							6.05762	1663.96
				6.16389	2082.64						6.16389	4633.07							6.37644	1393.78								6.16389	2837.24						6.16389	1016.12							6.16389	1727.28
				6.27017	1998.36						6.27017	4569.43							6.48272	1208.68								6.27017	2304.91						6.27017	974.71							6.27017	1482.7
				6.37644	1756.89						6.37644	4301.39							6.58899	1632								6.37644	2311.25						6.37644	888.576							6.37644	1519.49
				6.48272	3198.75						6.48272	4071.61							6.69526	1739.75								6.48272	2330.09						6.48272	929.995							6.48272	1774.1
				6.58899	3504.57						6.58899	4613.83							6.80154	1650.44								6.58899	2085.75						6.58899	837.551							6.58899	1970.32
				6.69526	1746.49						6.69526	4359.55							6.90781	1105.85								6.69526	1744.37						6.69526	700.679							6.69526	1845.57
				6.80154	1092.73						6.80154	4157.18							7.01409	1008.33								6.80154	1381.7						6.80154	560.911							6.80154	1757.33
				6.90781	1188.35						6.90781	4178.8							7.12036	1275.65								6.90781	1271.38						6.90781	434.788							6.90781	1535.78
				7.01409	1238.43						7.01409	4139.12							7.22663	1187.2								7.01409	1164.34						7.01409	619.733							7.01409	2190.15
				7.12036	1346.06						7.12036	3856.75							7.33291	1221								7.12036	1729.76						7.12036	631.324							7.12036	1956.93
				7.22663	1955.06						7.22663	3928.52							7.43918	1393.57								7.22663	2127.94						7.22663	549.992							7.22663	2390.57
				7.33291	1681.45						7.33291	4218.67							7.54546	1482.99								7.33291	1973.1						7.33291	453.899							7.33291	2271.13
				7.43918	1661.41						7.43918	4256.45							7.65173	1504.9								7.43918	1935.6						7.43918	434.928							7.43918	2487.84
				7.54546	1745.47						7.54546	3932.72							7.758	1765.61								7.54546	2142.06						7.54546	537.429							7.54546	2175.95
				7.65173	1604.01						7.65173	3355.59							7.86428	2866.81								7.65173	2238.79						7.65173	655.134							7.65173	2057.97
				7.758	1833.78						7.758	3451.38							7.97055	3079.92								7.758	2220.18						7.758	441.7							7.758	2181
				7.86428	1802.08						7.86428	4307.75							8.07683	3148.85								7.86428	2194.37						7.86428	302.435							7.86428	3372.9
				7.97055	2413.26						7.97055	4914.3							8.1831	2933.39								7.97055	2124.17						7.97055	286.862							7.97055	4163.61
				8.07683	2655.23						8.07683	5479.45							8.28937	1987.35								8.07683	1503.83						8.07683	326.628							8.07683	4026.8
				8.1831	2274.99						8.1831	6113.91							8.39565	1579.7								8.1831	1694.96						8.1831	523.625							8.1831	3596.22
				8.28937	2190.09						8.28937	6257.85							8.50192	1537.15								8.28937	1929.49						8.28937	582.319							8.28937	3335.19
				8.39565	2076.31						8.39565	6455.05							8.6082	1459.41								8.39565	1984.67						8.39565	577.342							8.39565	3462
				8.50192	1902.54						8.50192	7759.61							8.71447	1545.93								8.50192	1711.96						8.50192	682.481							8.50192	3630.49
				8.6082	1901.45						8.6082	10553.9							8.82074	1999.88								8.6082	1442.86						8.6082	393.956							8.6082	3916.71
				8.71447	2489.28						8.71447	10818.5							8.92702	1686.08								8.71447	1652.57						8.71447	316.412							8.71447	3356.64
				8.82074	3084.04						8.82074	7523.34							9.03329	1558.29								8.82074	1839.2						8.82074	429.807							8.82074	3220.19
				8.92702	3667.78						8.92702	6057.07							9.13957	1399.93								8.92702	2203.6						8.92702	794.658							8.92702	3361.62
				9.03329	2721.48						9.03329	6076.65							9.24584	1501.43								9.03329	1890.97						9.03329	966.102							9.03329	3636.37
				9.13957	1612.34						9.13957	5488.7							9.35211	1829.33								9.13957	1919.67						9.13957	577.153							9.13957	2944.65
				9.24584	1362.04						9.24584	3926							9.45839	1652.8								9.24584	1580.53						9.24584	559.989							9.24584	2646.98
				9.35211	1735.2						9.35211	3987.42							9.56466	1289.62								9.35211	1268.58						9.35211	560.762							9.35211	3196.96
				9.45839	2378.39						9.45839	4887.62							9.67094	1150.17								9.45839	1165.27						9.45839	561.17							9.45839	3588.19
				9.56466	1938.56						9.56466	4925.45							9.77721	1667.27								9.56466	1049.57						9.56466	728.192							9.56466	2876.43
				9.67094	1946.22						9.67094	4830.35							9.88348	1776.95								9.67094	1050.09						9.67094	759.146							9.67094	2600.79
				9.77721	1975.97						9.77721	5693.29							9.98976	1895.03								9.77721	1384.86						9.77721	799.111							9.77721	2745.15
				9.88348	1246.72						9.88348	6113.98							10.096	1694.67								9.88348	1148.51						9.88348	883.904							9.88348	2594.05
				9.98976	1027.33						9.98976	5743.5																9.98976	930						9.98976	683.333							9.98976	2901.66
																																											10.096	2570.22
[truncated: 17 more columns]
