# Supplementary material for: CYRI-B-mediated macropinocytosis drives metastasis via lysophosphatidic acid receptor uptake
Source: eLife journal article supplement (doi:10.7554/elife.83712), 2024-05-07
Supplement: fig5-data4 [file Figure 5- source data 4 Excel 5E.xlsx]

## Sheet: Sheet1
			Macropinocytic cups Life time all repeats all cells
					Frames until closure	Lifetime
		From rep2	Video 2	Cup 1	8	40
			Video 3	Cup1	3	15
				Cup 2	3	15
				Cup 3	2	10
				Cup 4	3	15
				Cup 5	4	20
			Video 7	Cup 1	3	15
				Cup 2	3	15
		From rep 2	Video 3	Cup 1	2	10
			Total 9 events from 4 cells
