# Supplementary material for: CYRI-B-mediated macropinocytosis drives metastasis via lysophosphatidic acid receptor uptake
Source: eLife journal article supplement (doi:10.7554/elife.83712), 2024-05-07
Supplement: fig6-data1 [file Figure 6- source data 1 Excel 6.xlsx]

## Sheet: Sheet1
					Lifetime of vesicle
					CYRI Before Rab5		total frames	Lifetime (s)		With Rab5		total frames	Lifetime
	Every 10s	Rep1	Video 1	Vesicle 1	Frame 30	Frame38	9	90		Frame 39	60	22	220
	Every 10s		Video 2	Vesicle 1	22	22	1	10		23	32	10	100
	Every 10s			Vesicle 2	54	55	2	20		56	60	5	50
	Every 10s			Vesicle 3	47	53	7	70		54	60	7	70
	Every 5s	Rep2	Video 1	Vesicle 1	45	50	6	30		51	55	5	25
	Every 5s			Vesicle 2	49	49	1	5		50	54	5	25
	Every 5s			Vesicle 3	53	54	2	10		55	56	2	10
	Every 5s		Video 2	Vesicle 1	24	36	13	65		37	66	30	150
			Video 3	Vesicle 1	12	39	28	140		40	48	9	45
	Every 5s	Rep 3	Video 1	Vesicle 1	8	10	3	15		11	22	12	60
