# Supplementary material for: CYRI-B-mediated macropinocytosis drives metastasis via lysophosphatidic acid receptor uptake
Source: eLife journal article supplement (doi:10.7554/elife.83712), 2024-05-07
Supplement: fig8-data1 [file Figure 8- source data 1 Excel 8A.xlsx]

## Sheet: Sheet1
			First frame	Last frame	Every	Number of frames
	Video 6	Vesicle 1	31	39	6s	8	48
		Vesicle 2	48	58	6s	10	60
			61	88	6s	27	162
	Video 5	Vesicle 1	20	34	6	14	84
		Vesicle 2	20	25	6	5	30
		Vesicle 3	9	23	6	14	84
		Vesicle 4	11	21	6	10	60
		Vesicle 5	17	19	6	2	12
			18	19	6	1	6
	Video 2	Vesicle 1	39	47	5	8	40
		Vesicle 2	9	26	5	17	85
		Vesicle 3	24	29	5	5	25
