# Supplementary material for: CYRI-B-mediated macropinocytosis drives metastasis via lysophosphatidic acid receptor uptake
Source: eLife journal article supplement (doi:10.7554/elife.83712), 2024-05-07
Supplement: fig8-figsupp1-data1 [file Figure 8- figure supplement 1- source data 1 Excel A.xls]

## Sheet: Sample Setup
Block Type	96-Well 0.1-mL Block
Calibration Background is expired	No
Calibration Background performed on	02-18-2021
Calibration Pure Dye ABY is expired	No
Calibration Pure Dye ABY performed on	02-18-2021
Calibration Pure Dye FAM is expired	No
Calibration Pure Dye FAM performed on	02-18-2021
Calibration Pure Dye JUN is expired	No
Calibration Pure Dye JUN performed on	02-18-2021
Calibration Pure Dye NED is expired	No
Calibration Pure Dye NED performed on	02-18-2021
Calibration Pure Dye ROX is expired	No
Calibration Pure Dye ROX performed on	02-18-2021
Calibration Pure Dye SYBR is expired	No
Calibration Pure Dye SYBR performed on	02-18-2021
Calibration Pure Dye TAMRA is expired	No
Calibration Pure Dye TAMRA performed on	02-18-2021
Calibration Pure Dye VIC is expired	No
Calibration Pure Dye VIC performed on	02-18-2021
Calibration ROI is expired	No
Calibration ROI performed on	02-18-2021
Calibration Uniformity is expired	No
Calibration Uniformity performed on	02-18-2021
Chemistry	SYBR_GREEN
Date Created	2021-06-01 12:13:36 PM BST
Experiment Barcode
Experiment Comment
Experiment File Name	N:\SNIKOLAO\qpCR\2021-06-01_120645.eds
Experiment Name	2021-06-01_120645
Experiment Run End Time	2021-06-01 12:14:45 PM BST
Experiment Type	Comparative Cт (ΔΔCт)
Instrument Name	272310805
Instrument Serial Number	272310805
Instrument Type	QuantStudio™ 3 System
Passive Reference
Post-read Stage/Step
Pre-read Stage/Step
Quantification Cycle Method	Ct
Signal Smoothing On	true
Stage where Melt Analysis is performed	Stage3
Stage/ Cycle where Ct Analysis is performed	Stage2, Step2
User Name
Well	Well Position	Sample Name	Sample Color	Biogroup Name	Biogroup Color	Target Name	Target Color	Task	Reporter	Quencher	Quantity	Comments
1	A1	GFP	RGB(176,23,31)			LPAR1	RGB(0,0,255)	UNKNOWN	SYBR	None
2	A2	GFP	RGB(176,23,31)			LPAR1	RGB(0,0,255)	UNKNOWN	SYBR	None
3	A3	GFP	RGB(176,23,31)			LPAR1	RGB(0,0,255)	UNKNOWN	SYBR	None
4	A4	GFP	RGB(176,23,31)			LPAR3	RGB(0,139,69)	UNKNOWN	SYBR	None
5	A5	GFP	RGB(176,23,31)			LPAR3	RGB(0,139,69)	UNKNOWN	SYBR	None
6	A6	GFP	RGB(176,23,31)			LPAR3	RGB(0,139,69)	UNKNOWN	SYBR	None
7	A7	GFP	RGB(176,23,31)			cdk2	RGB(176,23,31)	UNKNOWN	SYBR	None
8	A8	GFP	RGB(176,23,31)			cdk2	RGB(176,23,31)	UNKNOWN	SYBR	None
9	A9	GFP	RGB(176,23,31)			cdk2	RGB(176,23,31)	UNKNOWN	SYBR	None
10	A10
11	A11
12	A12
13	B1	P17	RGB(0,139,69)			LPAR1	RGB(0,0,255)	UNKNOWN	SYBR	None
14	B2	P17	RGB(0,139,69)			LPAR1	RGB(0,0,255)	UNKNOWN	SYBR	None
15	B3	P17	RGB(0,139,69)			LPAR1	RGB(0,0,255)	UNKNOWN	SYBR	None
16	B4	P17	RGB(0,139,69)			LPAR3	RGB(0,139,69)	UNKNOWN	SYBR	None
17	B5	P17	RGB(0,139,69)			LPAR3	RGB(0,139,69)	UNKNOWN	SYBR	None
18	B6	P17	RGB(0,139,69)			LPAR3	RGB(0,139,69)	UNKNOWN	SYBR	None
19	B7	P17	RGB(0,139,69)			cdk2	RGB(176,23,31)	UNKNOWN	SYBR	None
20	B8	P17	RGB(0,139,69)			cdk2	RGB(176,23,31)	UNKNOWN	SYBR	None
21	B9	P17	RGB(0,139,69)			cdk2	RGB(176,23,31)	UNKNOWN	SYBR	None
22	B10
23	B11
24	B12
25	C1	Water	RGB(255,127,0)			LPAR1	RGB(0,0,255)	UNKNOWN	SYBR	None
26	C2	Water	RGB(255,127,0)			LPAR1	RGB(0,0,255)	UNKNOWN	SYBR	None
27	C3	Water	RGB(255,127,0)			LPAR1	RGB(0,0,255)	UNKNOWN	SYBR	None
28	C4
29	C5
30	C6
31	C7
32	C8
33	C9
34	C10
35	C11
36	C12
37	D1
38	D2
39	D3
40	D4
41	D5
42	D6
43	D7
44	D8
45	D9
46	D10
47	D11
48	D12
49	E1
50	E2
51	E3
52	E4
53	E5
54	E6
55	E7
56	E8
57	E9
58	E10
59	E11
60	E12
61	F1
62	F2
63	F3
64	F4
65	F5
66	F6
67	F7
68	F8
69	F9
70	F10
71	F11
72	F12
73	G1
74	G2
75	G3
76	G4
77	G5
78	G6
79	G7
80	G8
81	G9
82	G10
83	G11
84	G12
85	H1
86	H2
87	H3
88	H4
89	H5
90	H6
91	H7
92	H8
93	H9
94	H10
95	H11
96	H12

## Sheet: Amplification Data
Block Type	96-Well 0.1-mL Block
Calibration Background is expired	No
Calibration Background performed on	02-18-2021
Calibration Pure Dye ABY is expired	No
Calibration Pure Dye ABY performed on	02-18-2021
Calibration Pure Dye FAM is expired	No
Calibration Pure Dye FAM performed on	02-18-2021
Calibration Pure Dye JUN is expired	No
Calibration Pure Dye JUN performed on	02-18-2021
Calibration Pure Dye NED is expired	No
Calibration Pure Dye NED performed on	02-18-2021
Calibration Pure Dye ROX is expired	No
Calibration Pure Dye ROX performed on	02-18-2021
Calibration Pure Dye SYBR is expired	No
Calibration Pure Dye SYBR performed on	02-18-2021
Calibration Pure Dye TAMRA is expired	No
Calibration Pure Dye TAMRA performed on	02-18-2021
Calibration Pure Dye VIC is expired	No
Calibration Pure Dye VIC performed on	02-18-2021
Calibration ROI is expired	No
Calibration ROI performed on	02-18-2021
Calibration Uniformity is expired	No
Calibration Uniformity performed on	02-18-2021
Chemistry	SYBR_GREEN
Date Created	2021-06-01 12:13:36 PM BST
Experiment Barcode
Experiment Comment
Experiment File Name	N:\SNIKOLAO\qpCR\2021-06-01_120645.eds
Experiment Name	2021-06-01_120645
Experiment Run End Time	2021-06-01 12:14:45 PM BST
Experiment Type	Comparative Cт (ΔΔCт)
Instrument Name	272310805
Instrument Serial Number	272310805
Instrument Type	QuantStudio™ 3 System
Passive Reference
Post-read Stage/Step
Pre-read Stage/Step
Quantification Cycle Method	Ct
Signal Smoothing On	true
Stage where Melt Analysis is performed	Stage3
Stage/ Cycle where Ct Analysis is performed	Stage2, Step2
User Name
Well	Well Position	Cycle	Target Name	Rn	Delta Rn

## Sheet: Results
Block Type	96-Well 0.1-mL Block
Calibration Background is expired	No
Calibration Background performed on	02-18-2021
Calibration Pure Dye ABY is expired	No
Calibration Pure Dye ABY performed on	02-18-2021
Calibration Pure Dye FAM is expired	No
Calibration Pure Dye FAM performed on	02-18-2021
Calibration Pure Dye JUN is expired	No
Calibration Pure Dye JUN performed on	02-18-2021
Calibration Pure Dye NED is expired	No
Calibration Pure Dye NED performed on	02-18-2021
Calibration Pure Dye ROX is expired	No
Calibration Pure Dye ROX performed on	02-18-2021
Calibration Pure Dye SYBR is expired	No
Calibration Pure Dye SYBR performed on	02-18-2021
Calibration Pure Dye TAMRA is expired	No
Calibration Pure Dye TAMRA performed on	02-18-2021
Calibration Pure Dye VIC is expired	No
Calibration Pure Dye VIC performed on	02-18-2021
Calibration ROI is expired	No
Calibration ROI performed on	02-18-2021
Calibration Uniformity is expired	No
Calibration Uniformity performed on	02-18-2021
Chemistry	SYBR_GREEN
Date Created	2021-06-01 12:13:36 PM BST
Experiment Barcode
Experiment Comment
Experiment File Name	N:\SNIKOLAO\qpCR\2021-06-01_120645.eds
Experiment Name	2021-06-01_120645
Experiment Run End Time	2021-06-01 12:14:45 PM BST
Experiment Type	Comparative Cт (ΔΔCт)
Instrument Name	272310805
Instrument Serial Number	272310805
Instrument Type	QuantStudio™ 3 System
Passive Reference
Post-read Stage/Step
Pre-read Stage/Step
Quantification Cycle Method	Ct
Signal Smoothing On	true
Stage where Melt Analysis is performed	Stage3
Stage/ Cycle where Ct Analysis is performed	Stage2, Step2
User Name
Well	Well Position	Omit	Sample Name	Target Name	Task	Reporter	Quencher	Quantity	Quantity Mean	Quantity SD	RQ	RQ Min	RQ Max	CT	Ct Mean	Ct SD	Delta Ct	Delta Ct Mean	Delta Ct SD	Delta Ct SE	Delta Delta Ct	Automatic Ct Threshold	Ct Threshold	Automatic Baseline	Baseline Start	Baseline End	Amp Status	Comments	Cq Conf	Rn (last cycle)	Delta Rn (last cycle)	Tm1	Tm2	Tm3	Tm4
1	A1	FALSE	GFP	LPAR1	UNKNOWN	SYBR	None															TRUE	0.2	TRUE	3	15	N/A
2	A2	FALSE	GFP	LPAR1	UNKNOWN	SYBR	None															TRUE	0.2	TRUE	3	15	N/A
3	A3	FALSE	GFP	LPAR1	UNKNOWN	SYBR	None															TRUE	0.2	TRUE	3	15	N/A
4	A4	FALSE	GFP	LPAR3	UNKNOWN	SYBR	None															TRUE	0.2	TRUE	3	15	N/A
5	A5	FALSE	GFP	LPAR3	UNKNOWN	SYBR	None															TRUE	0.2	TRUE	3	15	N/A
6	A6	FALSE	GFP	LPAR3	UNKNOWN	SYBR	None															TRUE	0.2	TRUE	3	15	N/A
7	A7	FALSE	GFP	cdk2	UNKNOWN	SYBR	None															TRUE	0.2	TRUE	3	15	N/A
8	A8	FALSE	GFP	cdk2	UNKNOWN	SYBR	None															TRUE	0.2	TRUE	3	15	N/A
9	A9	FALSE	GFP	cdk2	UNKNOWN	SYBR	None															TRUE	0.2	TRUE	3	15	N/A
13	B1	FALSE	P17	LPAR1	UNKNOWN	SYBR	None															TRUE	0.2	TRUE	3	15	N/A
14	B2	FALSE	P17	LPAR1	UNKNOWN	SYBR	None															TRUE	0.2	TRUE	3	15	N/A
15	B3	FALSE	P17	LPAR1	UNKNOWN	SYBR	None															TRUE	0.2	TRUE	3	15	N/A
16	B4	FALSE	P17	LPAR3	UNKNOWN	SYBR	None															TRUE	0.2	TRUE	3	15	N/A
17	B5	FALSE	P17	LPAR3	UNKNOWN	SYBR	None															TRUE	0.2	TRUE	3	15	N/A
18	B6	FALSE	P17	LPAR3	UNKNOWN	SYBR	None															TRUE	0.2	TRUE	3	15	N/A
19	B7	FALSE	P17	cdk2	UNKNOWN	SYBR	None															TRUE	0.2	TRUE	3	15	N/A
20	B8	FALSE	P17	cdk2	UNKNOWN	SYBR	None															TRUE	0.2	TRUE	3	15	N/A
21	B9	FALSE	P17	cdk2	UNKNOWN	SYBR	None															TRUE	0.2	TRUE	3	15	N/A
25	C1	FALSE	Water	LPAR1	UNKNOWN	SYBR	None															TRUE	0.2	TRUE	3	15	N/A
26	C2	FALSE	Water	LPAR1	UNKNOWN	SYBR	None															TRUE	0.2	TRUE	3	15	N/A
27	C3	FALSE	Water	LPAR1	UNKNOWN	SYBR	None															TRUE	0.2	TRUE	3	15	N/A
Analysis Type	Singleplex
Endogenous Control
RQ Min/Max Confidence Level	95.0
Reference Sample	Sample 1

## Sheet: Melt Curve Raw Data
Block Type	96-Well 0.1-mL Block
Calibration Background is expired	No
Calibration Background performed on	02-18-2021
Calibration Pure Dye ABY is expired	No
Calibration Pure Dye ABY performed on	02-18-2021
Calibration Pure Dye FAM is expired	No
Calibration Pure Dye FAM performed on	02-18-2021
Calibration Pure Dye JUN is expired	No
Calibration Pure Dye JUN performed on	02-18-2021
Calibration Pure Dye NED is expired	No
Calibration Pure Dye NED performed on	02-18-2021
Calibration Pure Dye ROX is expired	No
Calibration Pure Dye ROX performed on	02-18-2021
Calibration Pure Dye SYBR is expired	No
Calibration Pure Dye SYBR performed on	02-18-2021
Calibration Pure Dye TAMRA is expired	No
Calibration Pure Dye TAMRA performed on	02-18-2021
Calibration Pure Dye VIC is expired	No
Calibration Pure Dye VIC performed on	02-18-2021
Calibration ROI is expired	No
Calibration ROI performed on	02-18-2021
Calibration Uniformity is expired	No
Calibration Uniformity performed on	02-18-2021
Chemistry	SYBR_GREEN
Date Created	2021-06-01 12:13:36 PM BST
Experiment Barcode
Experiment Comment
Experiment File Name	N:\SNIKOLAO\qpCR\2021-06-01_120645.eds
Experiment Name	2021-06-01_120645
Experiment Run End Time	2021-06-01 12:14:45 PM BST
Experiment Type	Comparative Cт (ΔΔCт)
Instrument Name	272310805
Instrument Serial Number	272310805
Instrument Type	QuantStudio™ 3 System
Passive Reference
Post-read Stage/Step
Pre-read Stage/Step
Quantification Cycle Method	Ct
Signal Smoothing On	true
Stage where Melt Analysis is performed	Stage3
Stage/ Cycle where Ct Analysis is performed	Stage2, Step2
User Name
Well	Well Position	Reading	Temperature	Fluorescence	Derivative	Target Name

## Sheet: Melt Curve Result
Block Type	96-Well 0.1-mL Block
Calibration Background is expired	No
Calibration Background performed on	02-18-2021
Calibration Pure Dye ABY is expired	No
Calibration Pure Dye ABY performed on	02-18-2021
Calibration Pure Dye FAM is expired	No
Calibration Pure Dye FAM performed on	02-18-2021
Calibration Pure Dye JUN is expired	No
Calibration Pure Dye JUN performed on	02-18-2021
Calibration Pure Dye NED is expired	No
Calibration Pure Dye NED performed on	02-18-2021
Calibration Pure Dye ROX is expired	No
Calibration Pure Dye ROX performed on	02-18-2021
Calibration Pure Dye SYBR is expired	No
Calibration Pure Dye SYBR performed on	02-18-2021
Calibration Pure Dye TAMRA is expired	No
Calibration Pure Dye TAMRA performed on	02-18-2021
Calibration Pure Dye VIC is expired	No
Calibration Pure Dye VIC performed on	02-18-2021
Calibration ROI is expired	No
Calibration ROI performed on	02-18-2021
Calibration Uniformity is expired	No
Calibration Uniformity performed on	02-18-2021
Chemistry	SYBR_GREEN
Date Created	2021-06-01 12:13:36 PM BST
Experiment Barcode
Experiment Comment
Experiment File Name	N:\SNIKOLAO\qpCR\2021-06-01_120645.eds
Experiment Name	2021-06-01_120645
Experiment Run End Time	2021-06-01 12:14:45 PM BST
Experiment Type	Comparative Cт (ΔΔCт)
Instrument Name	272310805
Instrument Serial Number	272310805
Instrument Type	QuantStudio™ 3 System
Passive Reference
Post-read Stage/Step
Pre-read Stage/Step
Quantification Cycle Method	Ct
Signal Smoothing On	true
Stage where Melt Analysis is performed	Stage3
Stage/ Cycle where Ct Analysis is performed	Stage2, Step2
User Name
Well	Well Position	Sample	Target Name	Tm	Melt Peak Height
