# Supplementary material for: CYRI-B-mediated macropinocytosis drives metastasis via lysophosphatidic acid receptor uptake
Source: eLife journal article supplement (doi:10.7554/elife.83712), 2024-05-07
Supplement: fig9-data1 [file Figure 9- source data 1-5 9B.xlsx]

## Sheet: Sheet1
Repeat1
			Number of internalised vesicles						Number of internalised vesicles
	SFM		GFP	P17			15min stimulation		GFP	P17
		Image 1	54	16				Image 1	48	26
		Image 2	17	18				Image 2	53	26
		Image 3	43	21				Image 3	23	43
		Image 4	61	34				Image 4	35	83
		Image 5	43	48				Image 5	46	88
		Image6	51	25				Image6	48	145
		Image 7	17	15				Image 7	58	137
		Image 8 top cell	21	49				Image 8	81	77
		Image 8 bottom cell		14				image9	na	103
		image9	28	16				Image10	na	251
		Image10	26	58				Image11	42
								Image12	64
		Average	36.1	28.5455					49.8	97.9
Repeat2			Number of internalised vesicles						Number of internalised vesicles
	SFM		GFP	P17			15min		GFP	P17
		Image 1	26	41				Image 1	n/a	103
		Image 2	7	11				Image 2	19	84
		Image 3	19	80				Image 3	63	n/a
		Image 4	25	24				Image 4	91	40
		Image 5	25	62				Image 5	104	91
		Image6	38	37				Image6	47	91
		Image 7	14	43				Image 7	94	97
		Image 8	20	25				Image 8	n/a	86
		image9	27	8				image9	n/a	58
		Image10	22	11				Image10	n/a	317
								Image11	n/a	208
		Average	22.3	34.2				Average	69.6667	117.5
Repeat3			Number of internalised vesicles						Number of internalised vesicles
	SFM		GFP	P17			15min		GFP	P17
		Image 1	64	165				Image 1	38	134
		Image 2	62	57				Image 2	41	55
		Image 3	48	24				Image 3	40	109
		Image 4	22	26				Image 4	86	98
		Image 5	30	35				Image 5	45	76
		Image6	23	26				Image6	51	83
		Image 7	91	47				Image 7	39	110
		Image 8	38	50				Image 8	65	42
		image9	22	34				image9	59	88
		Image10	25	24				Image10	70	66
								Image11	170	70
								Image12	7	106
								Image13	30	87
		Average	42.5	48.8
								Average	57	86.4615
Repeat4			Number of internalised vesicles						Number of internalised vesicles
	SFM		GFP	P17			15min		GFP	P17
		Image 1	13	47				Image 1	19	84
		Image 2	24	20				Image 2	82	81
		Image 3	30	17				Image 3	67	101
		Image 4	9	9				Image 4	70	50
		Image 5	3	53				Image 5	8	54
		Image6	n/a	27				Image6	40	n/a
								Average	47.6667	74
		Average	15.8	28.8333
