# Supplementary material for: CYRI-B-mediated macropinocytosis drives metastasis via lysophosphatidic acid receptor uptake
Source: eLife. 2024 May 7;13:e83712. doi: 10.7554/eLife.83712 (PMC11219039; doi:10.7554/eLife.83712)
Supplement: Figure 3—source data 3. [file elife-83712-fig3-data3.xlsx]

## Sheet: Sheet1
		pERK stainning 15 weeks samples
		BSNA80.1f	HOM
		Layer 1			Layer 2			Layer 3			Layer 4			Layer 5			Layer 6			Layer 7			Layer 8
		Name	Value		Name	Value		Name	Value		Name	Value		Name	Value		Name	Value		Name	Value		Name	Value
		Tissue Area Analyzed (μm²)	424933		Tissue Area Analyzed (μm²)	450492		Tissue Area Analyzed (μm²)	426801		Tissue Area Analyzed (μm²)	413211		Tissue Area Analyzed (μm²)	278687		Tissue Area Analyzed (μm²)	329280		Tissue Area Analyzed (μm²)	507390		Tissue Area Analyzed (μm²)	725825
		Stain 1 Area (μm²)	113042		Stain 1 Area (μm²)	157343		Stain 1 Area (μm²)	147474		Stain 1 Area (μm²)	320472		Stain 1 Area (μm²)	194900		Stain 1 Area (μm²)	180741		Stain 1 Area (μm²)	174007		Stain 1 Area (μm²)	378941
		Stain 1 Weak Area (μm²)	35646.3		Stain 1 Weak Area (μm²)	50096.2		Stain 1 Weak Area (μm²)	43414.8		Stain 1 Weak Area (μm²)	55432.4		Stain 1 Weak Area (μm²)	34987.6		Stain 1 Weak Area (μm²)	45302.7		Stain 1 Weak Area (μm²)	48231.4		Stain 1 Weak Area (μm²)	84432.6
		Stain 1 Moderate Area (μm²)	22827.4		Stain 1 Moderate Area (μm²)	29325.2		Stain 1 Moderate Area (μm²)	27937.3		Stain 1 Moderate Area (μm²)	53768		Stain 1 Moderate Area (μm²)	40100.4		Stain 1 Moderate Area (μm²)	46665.7		Stain 1 Moderate Area (μm²)	29277.9		Stain 1 Moderate Area (μm²)	84360.4
		Stain 1 Strong Area (μm²)	54568.7		Stain 1 Strong Area (μm²)	77921.5		Stain 1 Strong Area (μm²)	76121.4		Stain 1 Strong Area (μm²)	211271		Stain 1 Strong Area (μm²)	119812		Stain 1 Strong Area (μm²)	88772.3		Stain 1 Strong Area (μm²)	96498.1		Stain 1 Strong Area (μm²)	210148
		Stain 2 Area (μm²)	226894		Stain 2 Area (μm²)	176763		Stain 2 Area (μm²)	206551		Stain 2 Area (μm²)	29217.8		Stain 2 Area (μm²)	59694.8		Stain 2 Area (μm²)	62176.7		Stain 2 Area (μm²)	152768		Stain 2 Area (μm²)	177685
		Stain 2 Weak Area (μm²)	61001.3		Stain 2 Weak Area (μm²)	61874.8		Stain 2 Weak Area (μm²)	60887		Stain 2 Weak Area (μm²)	13182.1		Stain 2 Weak Area (μm²)	18456.5		Stain 2 Weak Area (μm²)	20538.9		Stain 2 Weak Area (μm²)	70196.3		Stain 2 Weak Area (μm²)	52727.6
		Stain 2 Moderate Area (μm²)	55371.8		Stain 2 Moderate Area (μm²)	45612.7		Stain 2 Moderate Area (μm²)	48981.9		Stain 2 Moderate Area (μm²)	6453.91		Stain 2 Moderate Area (μm²)	12435		Stain 2 Moderate Area (μm²)	14605.7		Stain 2 Moderate Area (μm²)	40547.2		Stain 2 Moderate Area (μm²)	35939.6
		Stain 2 Strong Area (μm²)	110521		Stain 2 Strong Area (μm²)	69275.5		Stain 2 Strong Area (μm²)	96682.2		Stain 2 Strong Area (μm²)	9581.85		Stain 2 Strong Area (μm²)	28803.3		Stain 2 Strong Area (μm²)	27032.1		Stain 2 Strong Area (μm²)	42024		Stain 2 Strong Area (μm²)	89017.7
		% Stain 1 Positive Tissue	26.6024		% Stain 1 Positive Tissue	34.9269		% Stain 1 Positive Tissue	34.5532		% Stain 1 Positive Tissue	77.5564		% Stain 1 Positive Tissue	69.9352		% Stain 1 Positive Tissue	54.8896		% Stain 1 Positive Tissue	34.2946		% Stain 1 Positive Tissue	52.2084
		% Stain 1 Positive Tissue (weak)	8.38869		% Stain 1 Positive Tissue (weak)	11.1203		% Stain 1 Positive Tissue (weak)	10.1721		% Stain 1 Positive Tissue (weak)	13.415		% Stain 1 Positive Tissue (weak)	12.5545		% Stain 1 Positive Tissue (weak)	13.7581		% Stain 1 Positive Tissue (weak)	9.50578		% Stain 1 Positive Tissue (weak)	11.6326
		% Stain 1 Positive Tissue (moderate)	5.372		% Stain 1 Positive Tissue (moderate)	6.5096		% Stain 1 Positive Tissue (moderate)	6.54575		% Stain 1 Positive Tissue (moderate)	13.0122		% Stain 1 Positive Tissue (moderate)	14.3891		% Stain 1 Positive Tissue (moderate)	14.172		% Stain 1 Positive Tissue (moderate)	5.77028		% Stain 1 Positive Tissue (moderate)	11.6227
		% Stain 1 Positive Tissue (strong)	12.8417		% Stain 1 Positive Tissue (strong)	17.297		% Stain 1 Positive Tissue (strong)	17.8353		% Stain 1 Positive Tissue (strong)	51.1291		% Stain 1 Positive Tissue (strong)	42.9917		% Stain 1 Positive Tissue (strong)	26.9595		% Stain 1 Positive Tissue (strong)	19.0185		% Stain 1 Positive Tissue (strong)	28.953
	pEKR	% Stain 2 Positive Tissue	53.3953		% Stain 2 Positive Tissue	39.2378		% Stain 2 Positive Tissue	48.3952		% Stain 2 Positive Tissue	7.07091		% Stain 2 Positive Tissue	21.42		% Stain 2 Positive Tissue	18.8826		% Stain 2 Positive Tissue	30.1085		% Stain 2 Positive Tissue	24.4804		30.3738
		% Stain 2 Positive Tissue (weak)	14.3555		% Stain 2 Positive Tissue (weak)	13.7349		% Stain 2 Positive Tissue (weak)	14.2659		% Stain 2 Positive Tissue (weak)	3.19015		% Stain 2 Positive Tissue (weak)	6.62267		% Stain 2 Positive Tissue (weak)	6.23751		% Stain 2 Positive Tissue (weak)	13.8348		% Stain 2 Positive Tissue (weak)	7.26451
		% Stain 2 Positive Tissue (moderate)	13.0307		% Stain 2 Positive Tissue (moderate)	10.1251		% Stain 2 Positive Tissue (moderate)	11.4765		% Stain 2 Positive Tissue (moderate)	1.56189		% Stain 2 Positive Tissue (moderate)	4.462		% Stain 2 Positive Tissue (moderate)	4.43565		% Stain 2 Positive Tissue (moderate)	7.99133		% Stain 2 Positive Tissue (moderate)	4.95155
		% Stain 2 Positive Tissue (strong)	26.0091		% Stain 2 Positive Tissue (strong)	15.3778		% Stain 2 Positive Tissue (strong)	22.6528		% Stain 2 Positive Tissue (strong)	2.31887		% Stain 2 Positive Tissue (strong)	10.3354		% Stain 2 Positive Tissue (strong)	8.20943		% Stain 2 Positive Tissue (strong)	8.28239		% Stain 2 Positive Tissue (strong)	12.2643
		Stain 1 Average Positive Optical Density	0.407824		Stain 1 Average Positive Optical Density	0.421726		Stain 1 Average Positive Optical Density	0.427784		Stain 1 Average Positive Optical Density	0.49095		Stain 1 Average Positive Optical Density	0.468699		Stain 1 Average Positive Optical Density	0.431306		Stain 1 Average Positive Optical Density	0.476575		Stain 1 Average Positive Optical Density	0.443214
		Stain 2 Average Positive Optical Density	0.38843		Stain 2 Average Positive Optical Density	0.352264		Stain 2 Average Positive Optical Density	0.382718		Stain 2 Average Positive Optical Density	0.329512		Stain 2 Average Positive Optical Density	0.389302		Stain 2 Average Positive Optical Density	0.372358		Stain 2 Average Positive Optical Density	0.303284		Stain 2 Average Positive Optical Density	0.405562
		% Negative Tissue	31.2405		% Negative Tissue	35.2064		% Negative Tissue	30.1751		% Negative Tissue	18.5727		% Negative Tissue	16.4988		% Negative Tissue	33.2641		% Negative Tissue	45.2604		% Negative Tissue	29.2566
		BSNA70.2c	HOM
		Name	Value		Name	Value		Name	Value		Name	Value		Name	Value		Name	Value		Name	Value		Name	Value
		Tissue Area Analyzed (μm²)	498092		Tissue Area Analyzed (μm²)	542435		Tissue Area Analyzed (μm²)	542568		Tissue Area Analyzed (μm²)	595887		Tissue Area Analyzed (μm²)	637274		Tissue Area Analyzed (μm²)	510790		Tissue Area Analyzed (μm²)	493878		Tissue Area Analyzed (μm²)	484177
		Stain 1 Area (μm²)	271166		Stain 1 Area (μm²)	155441		Stain 1 Area (μm²)	172156		Stain 1 Area (μm²)	358784		Stain 1 Area (μm²)	224905		Stain 1 Area (μm²)	194404		Stain 1 Area (μm²)	205249		Stain 1 Area (μm²)	192045
		Stain 1 Weak Area (μm²)	66483		Stain 1 Weak Area (μm²)	44230.6		Stain 1 Weak Area (μm²)	48789.1		Stain 1 Weak Area (μm²)	87446.2		Stain 1 Weak Area (μm²)	65296		Stain 1 Weak Area (μm²)	52072.9		Stain 1 Weak Area (μm²)	51847.8		Stain 1 Weak Area (μm²)	52328.1
		Stain 1 Moderate Area (μm²)	47549		Stain 1 Moderate Area (μm²)	26749.2		Stain 1 Moderate Area (μm²)	31501.1		Stain 1 Moderate Area (μm²)	81260.7		Stain 1 Moderate Area (μm²)	43622.1		Stain 1 Moderate Area (μm²)	39090.6		Stain 1 Moderate Area (μm²)	36885.8		Stain 1 Moderate Area (μm²)	33788.5
		Stain 1 Strong Area (μm²)	157134		Stain 1 Strong Area (μm²)	84460.8		Stain 1 Strong Area (μm²)	91865.6		Stain 1 Strong Area (μm²)	190077		Stain 1 Strong Area (μm²)	115987		Stain 1 Strong Area (μm²)	103241		Stain 1 Strong Area (μm²)	116515		Stain 1 Strong Area (μm²)	105928
		Stain 2 Area (μm²)	82673.4		Stain 2 Area (μm²)	229853		Stain 2 Area (μm²)	137621		Stain 2 Area (μm²)	72550.6		Stain 2 Area (μm²)	174527		Stain 2 Area (μm²)	191119		Stain 2 Area (μm²)	104877		Stain 2 Area (μm²)	108428
		Stain 2 Weak Area (μm²)	23698.6		Stain 2 Weak Area (μm²)	31030		Stain 2 Weak Area (μm²)	22386.9		Stain 2 Weak Area (μm²)	28844.3		Stain 2 Weak Area (μm²)	58539		Stain 2 Weak Area (μm²)	51571.8		Stain 2 Weak Area (μm²)	38901.3		Stain 2 Weak Area (μm²)	43499.7
		Stain 2 Moderate Area (μm²)	14724.1		Stain 2 Moderate Area (μm²)	28628.4		Stain 2 Moderate Area (μm²)	22497.8		Stain 2 Moderate Area (μm²)	16828.4		Stain 2 Moderate Area (μm²)	38575.7		Stain 2 Moderate Area (μm²)	41548.9		Stain 2 Moderate Area (μm²)	25002.2		Stain 2 Moderate Area (μm²)	24427.2
		Stain 2 Strong Area (μm²)	44250.8		Stain 2 Strong Area (μm²)	170194		Stain 2 Strong Area (μm²)	92736.2		Stain 2 Strong Area (μm²)	26877.9		Stain 2 Strong Area (μm²)	77412.3		Stain 2 Strong Area (μm²)	97998.5		Stain 2 Strong Area (μm²)	40973.3		Stain 2 Strong Area (μm²)	40501
		% Stain 1 Positive Tissue	54.4409		% Stain 1 Positive Tissue	28.6561		% Stain 1 Positive Tissue	31.7298		% Stain 1 Positive Tissue	60.21		% Stain 1 Positive Tissue	35.2917		% Stain 1 Positive Tissue	38.0595		% Stain 1 Positive Tissue	41.5586		% Stain 1 Positive Tissue	39.6642
		% Stain 1 Positive Tissue (weak)	13.3475		% Stain 1 Positive Tissue (weak)	8.15408		% Stain 1 Positive Tissue (weak)	8.99226		% Stain 1 Positive Tissue (weak)	14.675		% Stain 1 Positive Tissue (weak)	10.2461		% Stain 1 Positive Tissue (weak)	10.1946		% Stain 1 Positive Tissue (weak)	10.4981		% Stain 1 Positive Tissue (weak)	10.8077
		% Stain 1 Positive Tissue (moderate)	9.54622		% Stain 1 Positive Tissue (moderate)	4.93131		% Stain 1 Positive Tissue (moderate)	5.80593		% Stain 1 Positive Tissue (moderate)	13.6369		% Stain 1 Positive Tissue (moderate)	6.8451		% Stain 1 Positive Tissue (moderate)	7.65297		% Stain 1 Positive Tissue (moderate)	7.46861		% Stain 1 Positive Tissue (moderate)	6.97855
		% Stain 1 Positive Tissue (strong)	31.5471		% Stain 1 Positive Tissue (strong)	15.5707		% Stain 1 Positive Tissue (strong)	16.9316		% Stain 1 Positive Tissue (strong)	31.8981		% Stain 1 Positive Tissue (strong)	18.2005		% Stain 1 Positive Tissue (strong)	20.2119		% Stain 1 Positive Tissue (strong)	23.5919		% Stain 1 Positive Tissue (strong)	21.878
	pEKR	% Stain 2 Positive Tissue	16.598		% Stain 2 Positive Tissue	42.3742		% Stain 2 Positive Tissue	25.3647		% Stain 2 Positive Tissue	12.1752		% Stain 2 Positive Tissue	27.3865		% Stain 2 Positive Tissue	37.4164		% Stain 2 Positive Tissue	21.2354		% Stain 2 Positive Tissue	22.3943		25.6181
		% Stain 2 Positive Tissue (weak)	4.75787		% Stain 2 Positive Tissue (weak)	5.72051		% Stain 2 Positive Tissue (weak)	4.1261		% Stain 2 Positive Tissue (weak)	4.84057		% Stain 2 Positive Tissue (weak)	9.18584		% Stain 2 Positive Tissue (weak)	10.0965		% Stain 2 Positive Tissue (weak)	7.8767		% Stain 2 Positive Tissue (weak)	8.98426
		% Stain 2 Positive Tissue (moderate)	2.95609		% Stain 2 Positive Tissue (moderate)	5.27775		% Stain 2 Positive Tissue (moderate)	4.14653		% Stain 2 Positive Tissue (moderate)	2.8241		% Stain 2 Positive Tissue (moderate)	6.05323		% Stain 2 Positive Tissue (moderate)	8.13424		% Stain 2 Positive Tissue (moderate)	5.06242		% Stain 2 Positive Tissue (moderate)	5.0451
		% Stain 2 Positive Tissue (strong)	8.88405		% Stain 2 Positive Tissue (strong)	31.3759		% Stain 2 Positive Tissue (strong)	17.0921		% Stain 2 Positive Tissue (strong)	4.51058		% Stain 2 Positive Tissue (strong)	12.1474		% Stain 2 Positive Tissue (strong)	19.1857		% Stain 2 Positive Tissue (strong)	8.29624		% Stain 2 Positive Tissue (strong)	8.36493
		Stain 1 Average Positive Optical Density	0.500933		Stain 1 Average Positive Optical Density	0.469005		Stain 1 Average Positive Optical Density	0.448069		Stain 1 Average Positive Optical Density	0.451194		Stain 1 Average Positive Optical Density	0.441009		Stain 1 Average Positive Optical Density	0.430587		Stain 1 Average Positive Optical Density	0.468619		Stain 1 Average Positive Optical Density	0.482937
		Stain 2 Average Positive Optical Density	0.449245		Stain 2 Average Positive Optical Density	0.550575		Stain 2 Average Positive Optical Density	0.482811		Stain 2 Average Positive Optical Density	0.355526		Stain 2 Average Positive Optical Density	0.397466		Stain 2 Average Positive Optical Density	0.408358		Stain 2 Average Positive Optical Density	0.346323		Stain 2 Average Positive Optical Density	0.346903
		% Negative Tissue	35.5492		% Negative Tissue	35.3718		% Negative Tissue	46.8515		% Negative Tissue	31.5979		% Negative Tissue	43.4064		% Negative Tissue	36.1364		% Negative Tissue	45.7376		% Negative Tissue	45.8977
		BSNA60.2h	HOM
		Name	Value		Name	Value		Name	Value		Name	Value		Name	Value		Name	Value		Name	Value		Name	Value
		Tissue Area Analyzed (μm²)	469748		Tissue Area Analyzed (μm²)	456219		Tissue Area Analyzed (μm²)	456287		Tissue Area Analyzed (μm²)	768290		Tissue Area Analyzed (μm²)	430149		Tissue Area Analyzed (μm²)	417759		Tissue Area Analyzed (μm²)	677534		Tissue Area Analyzed (μm²)	953995
		Stain 1 Area (μm²)	251629		Stain 1 Area (μm²)	208770		Stain 1 Area (μm²)	223397		Stain 1 Area (μm²)	422989		Stain 1 Area (μm²)	227563		Stain 1 Area (μm²)	167851		Stain 1 Area (μm²)	334041		Stain 1 Area (μm²)	374647
		Stain 1 Weak Area (μm²)	78216.5		Stain 1 Weak Area (μm²)	64348		Stain 1 Weak Area (μm²)	58254.9		Stain 1 Weak Area (μm²)	143123		Stain 1 Weak Area (μm²)	67879.5		Stain 1 Weak Area (μm²)	44777.3		Stain 1 Weak Area (μm²)	99417		Stain 1 Weak Area (μm²)	100273
		Stain 1 Moderate Area (μm²)	43598.4		Stain 1 Moderate Area (μm²)	35876.7		Stain 1 Moderate Area (μm²)	33978.4		Stain 1 Moderate Area (μm²)	73939.1		Stain 1 Moderate Area (μm²)	49918.9		Stain 1 Moderate Area (μm²)	26896.4		Stain 1 Moderate Area (μm²)	54686.5		Stain 1 Moderate Area (μm²)	60212.6
		Stain 1 Strong Area (μm²)	129814		Stain 1 Strong Area (μm²)	108545		Stain 1 Strong Area (μm²)	131164		Stain 1 Strong Area (μm²)	205926		Stain 1 Strong Area (μm²)	109765		Stain 1 Strong Area (μm²)	96177.1		Stain 1 Strong Area (μm²)	179938		Stain 1 Strong Area (μm²)	214161
		Stain 2 Area (μm²)	93489		Stain 2 Area (μm²)	141420		Stain 2 Area (μm²)	66981.8		Stain 2 Area (μm²)	139152		Stain 2 Area (μm²)	77894.4		Stain 2 Area (μm²)	182025		Stain 2 Area (μm²)	180767		Stain 2 Area (μm²)	109203
		Stain 2 Weak Area (μm²)	27630.8		Stain 2 Weak Area (μm²)	37544		Stain 2 Weak Area (μm²)	30033		Stain 2 Weak Area (μm²)	50316.1		Stain 2 Weak Area (μm²)	33985.4		Stain 2 Weak Area (μm²)	59643.4		Stain 2 Weak Area (μm²)	53159.5		Stain 2 Weak Area (μm²)	47248.2
		Stain 2 Moderate Area (μm²)	21075.2		Stain 2 Moderate Area (μm²)	25205.4		Stain 2 Moderate Area (μm²)	15698.6		Stain 2 Moderate Area (μm²)	33152.9		Stain 2 Moderate Area (μm²)	17081.9		Stain 2 Moderate Area (μm²)	43686.7		Stain 2 Moderate Area (μm²)	38647.8		Stain 2 Moderate Area (μm²)	24879.8
		Stain 2 Strong Area (μm²)	44783.1		Stain 2 Strong Area (μm²)	78670.3		Stain 2 Strong Area (μm²)	21250.2		Stain 2 Strong Area (μm²)	55682.9		Stain 2 Strong Area (μm²)	26827.1		Stain 2 Strong Area (μm²)	78695.1		Stain 2 Strong Area (μm²)	88959.9		Stain 2 Strong Area (μm²)	37074.6
		% Stain 1 Positive Tissue	53.5668		% Stain 1 Positive Tissue	45.7609		% Stain 1 Positive Tissue	48.9599		% Stain 1 Positive Tissue	55.0559		% Stain 1 Positive Tissue	52.9033		% Stain 1 Positive Tissue	40.1789		% Stain 1 Positive Tissue	49.3025		% Stain 1 Positive Tissue	39.2714
		% Stain 1 Positive Tissue (weak)	16.6508		% Stain 1 Positive Tissue (weak)	14.1046		% Stain 1 Positive Tissue (weak)	12.7672		% Stain 1 Positive Tissue (weak)	18.6288		% Stain 1 Positive Tissue (weak)	15.7804		% Stain 1 Positive Tissue (weak)	10.7185		% Stain 1 Positive Tissue (weak)	14.6734		% Stain 1 Positive Tissue (weak)	10.5109
		% Stain 1 Positive Tissue (moderate)	9.28124		% Stain 1 Positive Tissue (moderate)	7.86391		% Stain 1 Positive Tissue (moderate)	7.44673		% Stain 1 Positive Tissue (moderate)	9.62385		% Stain 1 Positive Tissue (moderate)	11.605		% Stain 1 Positive Tissue (moderate)	6.43826		% Stain 1 Positive Tissue (moderate)	8.0714		% Stain 1 Positive Tissue (moderate)	6.31163
		% Stain 1 Positive Tissue (strong)	27.6348		% Stain 1 Positive Tissue (strong)	23.7923		% Stain 1 Positive Tissue (strong)	28.746		% Stain 1 Positive Tissue (strong)	26.8032		% Stain 1 Positive Tissue (strong)	25.5179		% Stain 1 Positive Tissue (strong)	23.0221		% Stain 1 Positive Tissue (strong)	26.5577		% Stain 1 Positive Tissue (strong)	22.4489
		% Stain 2 Positive Tissue	19.902		% Stain 2 Positive Tissue	30.9982		% Stain 2 Positive Tissue	14.6798		% Stain 2 Positive Tissue	18.1119		% Stain 2 Positive Tissue	18.1087		% Stain 2 Positive Tissue	43.5718		% Stain 2 Positive Tissue	26.6802		% Stain 2 Positive Tissue	11.4469		22.9374
		% Stain 2 Positive Tissue (weak)	5.88204		% Stain 2 Positive Tissue (weak)	8.22938		% Stain 2 Positive Tissue (weak)	6.58205		% Stain 2 Positive Tissue (weak)	6.54911		% Stain 2 Positive Tissue (weak)	7.90083		% Stain 2 Positive Tissue (weak)	14.277		% Stain 2 Positive Tissue (weak)	7.84602		% Stain 2 Positive Tissue (weak)	4.95267
		% Stain 2 Positive Tissue (moderate)	4.4865		% Stain 2 Positive Tissue (moderate)	5.52485		% Stain 2 Positive Tissue (moderate)	3.44051		% Stain 2 Positive Tissue (moderate)	4.31515		% Stain 2 Positive Tissue (moderate)	3.97115		% Stain 2 Positive Tissue (moderate)	10.4574		% Stain 2 Positive Tissue (moderate)	5.70419		% Stain 2 Positive Tissue (moderate)	2.60796
		% Stain 2 Positive Tissue (strong)	9.53343		% Stain 2 Positive Tissue (strong)	17.244		% Stain 2 Positive Tissue (strong)	4.65719		% Stain 2 Positive Tissue (strong)	7.24765		% Stain 2 Positive Tissue (strong)	6.2367		% Stain 2 Positive Tissue (strong)	18.8374		% Stain 2 Positive Tissue (strong)	13.13		% Stain 2 Positive Tissue (strong)	3.88625
		Stain 1 Average Positive Optical Density	0.442182		Stain 1 Average Positive Optical Density	0.516146		Stain 1 Average Positive Optical Density	0.527358		Stain 1 Average Positive Optical Density	0.456434		Stain 1 Average Positive Optical Density	0.436763		Stain 1 Average Positive Optical Density	0.506394		Stain 1 Average Positive Optical Density	0.488539		Stain 1 Average Positive Optical Density	0.530851
		Stain 2 Average Positive Optical Density	0.396442		Stain 2 Average Positive Optical Density	0.479113		Stain 2 Average Positive Optical Density	0.331063		Stain 2 Average Positive Optical Density	0.362015		Stain 2 Average Positive Optical Density	0.344668		Stain 2 Average Positive Optical Density	0.375399		Stain 2 Average Positive Optical Density	0.411683		Stain 2 Average Positive Optical Density	0.340674
		% Negative Tissue	34.1794		% Negative Tissue	32.5728		% Negative Tissue	43.367		% Negative Tissue	34.1485		% Negative Tissue	36.3454		% Negative Tissue	30.1253		% Negative Tissue	33.3172		% Negative Tissue	53.2357
		BSNA47.1a	WT
		Name	Value		Name	Value		Name	Value		Name	Value		Name	Value		Name	Value		Name	Value		Name	Value
		Tissue Area Analyzed (μm²)	442825		Tissue Area Analyzed (μm²)	594672		Tissue Area Analyzed (μm²)	390527		Tissue Area Analyzed (μm²)	452544		Tissue Area Analyzed (μm²)	387710		Tissue Area Analyzed (μm²)	499763		Tissue Area Analyzed (μm²)	416582		Tissue Area Analyzed (μm²)	412926
		Stain 1 Area (μm²)	237367		Stain 1 Area (μm²)	289348		Stain 1 Area (μm²)	227529		Stain 1 Area (μm²)	274155		Stain 1 Area (μm²)	230972		Stain 1 Area (μm²)	333956		Stain 1 Area (μm²)	228681		Stain 1 Area (μm²)	248030
		Stain 1 Weak Area (μm²)	52887.5		Stain 1 Weak Area (μm²)	65931.6		Stain 1 Weak Area (μm²)	58821.3		Stain 1 Weak Area (μm²)	66802.2		Stain 1 Weak Area (μm²)	54714.8		Stain 1 Weak Area (μm²)	68845.4		Stain 1 Weak Area (μm²)	66996.2		Stain 1 Weak Area (μm²)	67146.3
		Stain 1 Moderate Area (μm²)	35957.5		Stain 1 Moderate Area (μm²)	46109.2		Stain 1 Moderate Area (μm²)	40357.3		Stain 1 Moderate Area (μm²)	42912.5		Stain 1 Moderate Area (μm²)	36575.8		Stain 1 Moderate Area (μm²)	52178		Stain 1 Moderate Area (μm²)	37710.8		Stain 1 Moderate Area (μm²)	39995.9
		Stain 1 Strong Area (μm²)	148522		Stain 1 Strong Area (μm²)	177307		Stain 1 Strong Area (μm²)	128350		Stain 1 Strong Area (μm²)	164440		Stain 1 Strong Area (μm²)	139681		Stain 1 Strong Area (μm²)	212932		Stain 1 Strong Area (μm²)	123974		Stain 1 Strong Area (μm²)	140887
		Stain 2 Area (μm²)	99417		Stain 2 Area (μm²)	88246.4		Stain 2 Area (μm²)	29365		Stain 2 Area (μm²)	56133.8		Stain 2 Area (μm²)	24136.2		Stain 2 Area (μm²)	36034.9		Stain 2 Area (μm²)	60312.5		Stain 2 Area (μm²)	70339.5
		Stain 2 Weak Area (μm²)	36333.9		Stain 2 Weak Area (μm²)	40784.5		Stain 2 Weak Area (μm²)	11890		Stain 2 Weak Area (μm²)	24036.3		Stain 2 Weak Area (μm²)	10656.3		Stain 2 Weak Area (μm²)	17120.6		Stain 2 Weak Area (μm²)	19193.2		Stain 2 Weak Area (μm²)	26458.2
		Stain 2 Moderate Area (μm²)	24352.7		Stain 2 Moderate Area (μm²)	22817		Stain 2 Moderate Area (μm²)	6870.74		Stain 2 Moderate Area (μm²)	12900.9		Stain 2 Moderate Area (μm²)	5132.42		Stain 2 Moderate Area (μm²)	8494.75		Stain 2 Moderate Area (μm²)	13943		Stain 2 Moderate Area (μm²)	18535.6
		Stain 2 Strong Area (μm²)	38730.4		Stain 2 Strong Area (μm²)	24644.8		Stain 2 Strong Area (μm²)	10604.3		Stain 2 Strong Area (μm²)	19196.6		Stain 2 Strong Area (μm²)	8347.54		Stain 2 Strong Area (μm²)	10419.6		Stain 2 Strong Area (μm²)	27176.4		Stain 2 Strong Area (μm²)	25345.7
		% Stain 1 Positive Tissue	53.6029		% Stain 1 Positive Tissue	48.6568		% Stain 1 Positive Tissue	58.2621		% Stain 1 Positive Tissue	60.5808		% Stain 1 Positive Tissue	59.5733		% Stain 1 Positive Tissue	66.8229		% Stain 1 Positive Tissue	54.8945		% Stain 1 Positive Tissue	60.0664
		% Stain 1 Positive Tissue (weak)	11.9432		% Stain 1 Positive Tissue (weak)	11.0871		% Stain 1 Positive Tissue (weak)	15.062		% Stain 1 Positive Tissue (weak)	14.7615		% Stain 1 Positive Tissue (weak)	14.1123		% Stain 1 Positive Tissue (weak)	13.7756		% Stain 1 Positive Tissue (weak)	16.0824		% Stain 1 Positive Tissue (weak)	16.2611
		% Stain 1 Positive Tissue (moderate)	8.12002		% Stain 1 Positive Tissue (moderate)	7.75372		% Stain 1 Positive Tissue (moderate)	10.3341		% Stain 1 Positive Tissue (moderate)	9.4825		% Stain 1 Positive Tissue (moderate)	9.4338		% Stain 1 Positive Tissue (moderate)	10.4406		% Stain 1 Positive Tissue (moderate)	9.05245		% Stain 1 Positive Tissue (moderate)	9.68598
		% Stain 1 Positive Tissue (strong)	33.5396		% Stain 1 Positive Tissue (strong)	29.816		% Stain 1 Positive Tissue (strong)	32.8659		% Stain 1 Positive Tissue (strong)	36.3369		% Stain 1 Positive Tissue (strong)	36.0272		% Stain 1 Positive Tissue (strong)	42.6067		% Stain 1 Positive Tissue (strong)	29.7597		% Stain 1 Positive Tissue (strong)	34.1193
		% Stain 2 Positive Tissue	22.4506		% Stain 2 Positive Tissue	14.8395		% Stain 2 Positive Tissue	7.51934		% Stain 2 Positive Tissue	12.404		% Stain 2 Positive Tissue	6.22532		% Stain 2 Positive Tissue	7.2104		% Stain 2 Positive Tissue	14.478		% Stain 2 Positive Tissue	17.0344		12.7702
		% Stain 2 Positive Tissue (weak)	8.20502		% Stain 2 Positive Tissue (weak)	6.85832		% Stain 2 Positive Tissue (weak)	3.04461		% Stain 2 Positive Tissue (weak)	5.31137		% Stain 2 Positive Tissue (weak)	2.74851		% Stain 2 Positive Tissue (weak)	3.42574		% Stain 2 Positive Tissue (weak)	4.6073		% Stain 2 Positive Tissue (weak)	6.4075
		% Stain 2 Positive Tissue (moderate)	5.49939		% Stain 2 Positive Tissue (moderate)	3.83691		% Stain 2 Positive Tissue (moderate)	1.75935		% Stain 2 Positive Tissue (moderate)	2.85075		% Stain 2 Positive Tissue (moderate)	1.32378		% Stain 2 Positive Tissue (moderate)	1.69976		% Stain 2 Positive Tissue (moderate)	3.34699		% Stain 2 Positive Tissue (moderate)	4.48884
		% Stain 2 Positive Tissue (strong)	8.7462		% Stain 2 Positive Tissue (strong)	4.14427		% Stain 2 Positive Tissue (strong)	2.71538		% Stain 2 Positive Tissue (strong)	4.24193		% Stain 2 Positive Tissue (strong)	2.15303		% Stain 2 Positive Tissue (strong)	2.0849		% Stain 2 Positive Tissue (strong)	6.52366		% Stain 2 Positive Tissue (strong)	6.13808
		Stain 1 Average Positive Optical Density	0.526126		Stain 1 Average Positive Optical Density	0.512319		Stain 1 Average Positive Optical Density	0.48183		Stain 1 Average Positive Optical Density	0.513197		Stain 1 Average Positive Optical Density	0.517035		Stain 1 Average Positive Optical Density	0.523438		Stain 1 Average Positive Optical Density	0.463379		Stain 1 Average Positive Optical Density	0.475403
		Stain 2 Average Positive Optical Density	0.349385		Stain 2 Average Positive Optical Density	0.306507		Stain 2 Average Positive Optical Density	0.35119		Stain 2 Average Positive Optical Density	0.332558		Stain 2 Average Positive Optical Density	0.346311		Stain 2 Average Positive Optical Density	0.313835		Stain 2 Average Positive Optical Density	0.373817		Stain 2 Average Positive Optical Density	0.334308
		% Negative Tissue	35.3432		% Negative Tissue	44.1064		% Negative Tissue	37.4521		% Negative Tissue	34.0918		% Negative Tissue	37.2536		% Negative Tissue	29.7149		% Negative Tissue	37.7581		% Negative Tissue	31.7214
		BSNA87.2d	WT
		Name	Value		Name	Value		Name	Value		Name	Value		Name	Value		Name	Value		Name	Value		Name	Value
		Tissue Area Analyzed (μm²)	518413		Tissue Area Analyzed (μm²)	554232		Tissue Area Analyzed (μm²)	474056		Tissue Area Analyzed (μm²)	428026		Tissue Area Analyzed (μm²)	437662		Tissue Area Analyzed (μm²)	441859		Tissue Area Analyzed (μm²)	843190		Tissue Area Analyzed (μm²)	512129
		Stain 1 Area (μm²)	194958		Stain 1 Area (μm²)	234108		Stain 1 Area (μm²)	231171		Stain 1 Area (μm²)	214722		Stain 1 Area (μm²)	210897		Stain 1 Area (μm²)	289653		Stain 1 Area (μm²)	593005		Stain 1 Area (μm²)	404914
		Stain 1 Weak Area (μm²)	53641		Stain 1 Weak Area (μm²)	70509.8		Stain 1 Weak Area (μm²)	77698.1		Stain 1 Weak Area (μm²)	65508.4		Stain 1 Weak Area (μm²)	92443.5		Stain 1 Weak Area (μm²)	110559		Stain 1 Weak Area (μm²)	261419		Stain 1 Weak Area (μm²)	133092
		Stain 1 Moderate Area (μm²)	32493		Stain 1 Moderate Area (μm²)	39100.5		Stain 1 Moderate Area (μm²)	54489		Stain 1 Moderate Area (μm²)	49024.1		Stain 1 Moderate Area (μm²)	38752.3		Stain 1 Moderate Area (μm²)	79785.7		Stain 1 Moderate Area (μm²)	172516		Stain 1 Moderate Area (μm²)	137035
		Stain 1 Strong Area (μm²)	108825		Stain 1 Strong Area (μm²)	124498		Stain 1 Strong Area (μm²)	98983.4		Stain 1 Strong Area (μm²)	100189		Stain 1 Strong Area (μm²)	79701.4		Stain 1 Strong Area (μm²)	99307.9		Stain 1 Strong Area (μm²)	159069		Stain 1 Strong Area (μm²)	134787
		Stain 2 Area (μm²)	123012		Stain 2 Area (μm²)	109039		Stain 2 Area (μm²)	119462		Stain 2 Area (μm²)	55411.6		Stain 2 Area (μm²)	48655.8		Stain 2 Area (μm²)	46338.4		Stain 2 Area (μm²)	29471.3		Stain 2 Area (μm²)	4740.41
		Stain 2 Weak Area (μm²)	30598.2		Stain 2 Weak Area (μm²)	29374.3		Stain 2 Weak Area (μm²)	28974.8		Stain 2 Weak Area (μm²)	16961.2		Stain 2 Weak Area (μm²)	16049		Stain 2 Weak Area (μm²)	12090.9		Stain 2 Weak Area (μm²)	9619.96		Stain 2 Weak Area (μm²)	2342.21
		Stain 2 Moderate Area (μm²)	22720		Stain 2 Moderate Area (μm²)	21803.8		Stain 2 Moderate Area (μm²)	22672.1		Stain 2 Moderate Area (μm²)	10673		Stain 2 Moderate Area (μm²)	10381.4		Stain 2 Moderate Area (μm²)	10526.4		Stain 2 Moderate Area (μm²)	5686.65		Stain 2 Moderate Area (μm²)	1106.73
		Stain 2 Strong Area (μm²)	69693.5		Stain 2 Strong Area (μm²)	57861.2		Stain 2 Strong Area (μm²)	67815.4		Stain 2 Strong Area (μm²)	27777.4		Stain 2 Strong Area (μm²)	22225.3		Stain 2 Strong Area (μm²)	23721.1		Stain 2 Strong Area (μm²)	14164.7		Stain 2 Strong Area (μm²)	1291.47
		% Stain 1 Positive Tissue	37.6068		% Stain 1 Positive Tissue	42.2401		% Stain 1 Positive Tissue	48.7644		% Stain 1 Positive Tissue	50.1656		% Stain 1 Positive Tissue	48.1872		% Stain 1 Positive Tissue	65.5533		% Stain 1 Positive Tissue	70.3287		% Stain 1 Positive Tissue	79.0649
		% Stain 1 Positive Tissue (weak)	10.3471		% Stain 1 Positive Tissue (weak)	12.7221		% Stain 1 Positive Tissue (weak)	16.3901		% Stain 1 Positive Tissue (weak)	15.3048		% Stain 1 Positive Tissue (weak)	21.1221		% Stain 1 Positive Tissue (weak)	25.0214		% Stain 1 Positive Tissue (weak)	31.0036		% Stain 1 Positive Tissue (weak)	25.9879
		% Stain 1 Positive Tissue (moderate)	6.26778		% Stain 1 Positive Tissue (moderate)	7.05489		% Stain 1 Positive Tissue (moderate)	11.4942		% Stain 1 Positive Tissue (moderate)	11.4535		% Stain 1 Positive Tissue (moderate)	8.85439		% Stain 1 Positive Tissue (moderate)	18.0568		% Stain 1 Positive Tissue (moderate)	20.4599		% Stain 1 Positive Tissue (moderate)	26.758
		% Stain 1 Positive Tissue (strong)	20.9918		% Stain 1 Positive Tissue (strong)	22.4631		% Stain 1 Positive Tissue (strong)	20.8801		% Stain 1 Positive Tissue (strong)	23.4073		% Stain 1 Positive Tissue (strong)	18.2107		% Stain 1 Positive Tissue (strong)	22.475		% Stain 1 Positive Tissue (strong)	18.8652		% Stain 1 Positive Tissue (strong)	26.3189
		% Stain 2 Positive Tissue	23.7285		% Stain 2 Positive Tissue	19.6739		% Stain 2 Positive Tissue	25.2		% Stain 2 Positive Tissue	12.9458		% Stain 2 Positive Tissue	11.1172		% Stain 2 Positive Tissue	10.4871		% Stain 2 Positive Tissue	3.49521		% Stain 2 Positive Tissue	0.925628		13.4467
		% Stain 2 Positive Tissue (weak)	5.90228		% Stain 2 Positive Tissue (weak)	5.29999		% Stain 2 Positive Tissue (weak)	6.1121		% Stain 2 Positive Tissue (weak)	3.96266		% Stain 2 Positive Tissue (weak)	3.66699		% Stain 2 Positive Tissue (weak)	2.73637		% Stain 2 Positive Tissue (weak)	1.1409		% Stain 2 Positive Tissue (weak)	0.457347
		% Stain 2 Positive Tissue (moderate)	4.38261		% Stain 2 Positive Tissue (moderate)	3.93406		% Stain 2 Positive Tissue (moderate)	4.78258		% Stain 2 Positive Tissue (moderate)	2.49354		% Stain 2 Positive Tissue (moderate)	2.37202		% Stain 2 Positive Tissue (moderate)	2.38229		% Stain 2 Positive Tissue (moderate)	0.674421		% Stain 2 Positive Tissue (moderate)	0.216104
		% Stain 2 Positive Tissue (strong)	13.4436		% Stain 2 Positive Tissue (strong)	10.4399		% Stain 2 Positive Tissue (strong)	14.3054		% Stain 2 Positive Tissue (strong)	6.48965		% Stain 2 Positive Tissue (strong)	5.07818		% Stain 2 Positive Tissue (strong)	5.36848		% Stain 2 Positive Tissue (strong)	1.67989		% Stain 2 Positive Tissue (strong)	0.252178
		Stain 1 Average Positive Optical Density	0.489033		Stain 1 Average Positive Optical Density	0.475792		Stain 1 Average Positive Optical Density	0.407329		Stain 1 Average Positive Optical Density	0.417273		Stain 1 Average Positive Optical Density	0.383555		Stain 1 Average Positive Optical Density	0.37524		Stain 1 Average Positive Optical Density	0.352968		Stain 1 Average Positive Optical Density	0.370207
		Stain 2 Average Positive Optical Density	0.460129		Stain 2 Average Positive Optical Density	0.447451		Stain 2 Average Positive Optical Density	0.455909		Stain 2 Average Positive Optical Density	0.422673		Stain 2 Average Positive Optical Density	0.400883		Stain 2 Average Positive Optical Density	0.433952		Stain 2 Average Positive Optical Density	0.446932		Stain 2 Average Positive Optical Density	0.307759
		% Negative Tissue	45.3595		% Negative Tissue	43.7207		% Negative Tissue	33.0524		% Negative Tissue	39.9475		% Negative Tissue	43.2812		% Negative Tissue	26.5261		% Negative Tissue	27.3626		% Negative Tissue	20.5105
		BSNA54.1d	WT
		Name	Value		Name	Value		Name	Value		Name	Value		Name	Value		Name	Value		Name	Value		Name	Value
		Tissue Area Analyzed (μm²)	438883		Tissue Area Analyzed (μm²)	451362		Tissue Area Analyzed (μm²)	408222		Tissue Area Analyzed (μm²)	408222		Tissue Area Analyzed (μm²)	507068		Tissue Area Analyzed (μm²)	457239		Tissue Area Analyzed (μm²)	524954		Tissue Area Analyzed (μm²)	507099
		Stain 1 Area (μm²)	249144		Stain 1 Area (μm²)	263002		Stain 1 Area (μm²)	189775		Stain 1 Area (μm²)	189775		Stain 1 Area (μm²)	275935		Stain 1 Area (μm²)	291645		Stain 1 Area (μm²)	271758		Stain 1 Area (μm²)	252414
		Stain 1 Weak Area (μm²)	67545.2		Stain 1 Weak Area (μm²)	63725.1		Stain 1 Weak Area (μm²)	50503.8		Stain 1 Weak Area (μm²)	50503.8		Stain 1 Weak Area (μm²)	76325.8		Stain 1 Weak Area (μm²)	68176.8		Stain 1 Weak Area (μm²)	81009		Stain 1 Weak Area (μm²)	73290.8
		Stain 1 Moderate Area (μm²)	43287.2		Stain 1 Moderate Area (μm²)	48688.1		Stain 1 Moderate Area (μm²)	33098.6		Stain 1 Moderate Area (μm²)	33098.6		Stain 1 Moderate Area (μm²)	42276.3		Stain 1 Moderate Area (μm²)	51027.4		Stain 1 Moderate Area (μm²)	52754.8		Stain 1 Moderate Area (μm²)	41737.1
		Stain 1 Strong Area (μm²)	138311		Stain 1 Strong Area (μm²)	150589		Stain 1 Strong Area (μm²)	106172		Stain 1 Strong Area (μm²)	106172		Stain 1 Strong Area (μm²)	157333		Stain 1 Strong Area (μm²)	172440		Stain 1 Strong Area (μm²)	137994		Stain 1 Strong Area (μm²)	137386
		Stain 2 Area (μm²)	6276.09		Stain 2 Area (μm²)	18439.7		Stain 2 Area (μm²)	36837.9		Stain 2 Area (μm²)	36837.9		Stain 2 Area (μm²)	58287.3		Stain 2 Area (μm²)	21637.5		Stain 2 Area (μm²)	494.19		Stain 2 Area (μm²)	55566.9
		Stain 2 Weak Area (μm²)	3330.58		Stain 2 Weak Area (μm²)	6855.15		Stain 2 Weak Area (μm²)	16783.4		Stain 2 Weak Area (μm²)	16783.4		Stain 2 Weak Area (μm²)	18574.8		Stain 2 Weak Area (μm²)	11659.6		Stain 2 Weak Area (μm²)	326.188		Stain 2 Weak Area (μm²)	16473.4
		Stain 2 Moderate Area (μm²)	1561.09		Stain 2 Moderate Area (μm²)	3728.94		Stain 2 Moderate Area (μm²)	9062.26		Stain 2 Moderate Area (μm²)	9062.26		Stain 2 Moderate Area (μm²)	11826.5		Stain 2 Moderate Area (μm²)	4807.38		Stain 2 Moderate Area (μm²)	111.424		Stain 2 Moderate Area (μm²)	10706.5
		Stain 2 Strong Area (μm²)	1384.42		Stain 2 Strong Area (μm²)	7855.65		Stain 2 Strong Area (μm²)	10992.3		Stain 2 Strong Area (μm²)	10992.3		Stain 2 Strong Area (μm²)	27885.9		Stain 2 Strong Area (μm²)	5170.52		Stain 2 Strong Area (μm²)	56.5778		Stain 2 Strong Area (μm²)	28387
		% Stain 1 Positive Tissue	56.7677		% Stain 1 Positive Tissue	58.2687		% Stain 1 Positive Tissue	46.4881		% Stain 1 Positive Tissue	46.4881		% Stain 1 Positive Tissue	54.4178		% Stain 1 Positive Tissue	63.7839		% Stain 1 Positive Tissue	51.7679		% Stain 1 Positive Tissue	49.7761
		% Stain 1 Positive Tissue (weak)	15.3903		% Stain 1 Positive Tissue (weak)	14.1184		% Stain 1 Positive Tissue (weak)	12.3716		% Stain 1 Positive Tissue (weak)	12.3716		% Stain 1 Positive Tissue (weak)	15.0524		% Stain 1 Positive Tissue (weak)	14.9106		% Stain 1 Positive Tissue (weak)	15.4317		% Stain 1 Positive Tissue (weak)	14.4529
		% Stain 1 Positive Tissue (moderate)	9.86304		% Stain 1 Positive Tissue (moderate)	10.7869		% Stain 1 Positive Tissue (moderate)	8.10798		% Stain 1 Positive Tissue (moderate)	8.10798		% Stain 1 Positive Tissue (moderate)	8.3374		% Stain 1 Positive Tissue (moderate)	11.1599		% Stain 1 Positive Tissue (moderate)	10.0494		% Stain 1 Positive Tissue (moderate)	8.23056
		% Stain 1 Positive Tissue (strong)	31.5144		% Stain 1 Positive Tissue (strong)	33.3633		% Stain 1 Positive Tissue (strong)	26.0085		% Stain 1 Positive Tissue (strong)	26.0085		% Stain 1 Positive Tissue (strong)	31.028		% Stain 1 Positive Tissue (strong)	37.7134		% Stain 1 Positive Tissue (strong)	26.2869		% Stain 1 Positive Tissue (strong)	27.0926
		% Stain 2 Positive Tissue	1.43002		% Stain 2 Positive Tissue	4.08536		% Stain 2 Positive Tissue	9.02399		% Stain 2 Positive Tissue	9.02399		% Stain 2 Positive Tissue	11.495		% Stain 2 Positive Tissue	4.73222		% Stain 2 Positive Tissue	0.09414		% Stain 2 Positive Tissue	10.9578		6.35531
		% Stain 2 Positive Tissue (weak)	0.758877		% Stain 2 Positive Tissue (weak)	1.51877		% Stain 2 Positive Tissue (weak)	4.11134		% Stain 2 Positive Tissue (weak)	4.11134		% Stain 2 Positive Tissue (weak)	3.66318		% Stain 2 Positive Tissue (weak)	2.55001		% Stain 2 Positive Tissue (weak)	0.062137		% Stain 2 Positive Tissue (weak)	3.24855
		% Stain 2 Positive Tissue (moderate)	0.355695		% Stain 2 Positive Tissue (moderate)	0.826153		% Stain 2 Positive Tissue (moderate)	2.21993		% Stain 2 Positive Tissue (moderate)	2.21993		% Stain 2 Positive Tissue (moderate)	2.33233		% Stain 2 Positive Tissue (moderate)	1.05139		% Stain 2 Positive Tissue (moderate)	0.021225		% Stain 2 Positive Tissue (moderate)	2.11132
		% Stain 2 Positive Tissue (strong)	0.315442		% Stain 2 Positive Tissue (strong)	1.74043		% Stain 2 Positive Tissue (strong)	2.69272		% Stain 2 Positive Tissue (strong)	2.69272		% Stain 2 Positive Tissue (strong)	5.49944		% Stain 2 Positive Tissue (strong)	1.13081		% Stain 2 Positive Tissue (strong)	0.010778		% Stain 2 Positive Tissue (strong)	5.59793
		Stain 1 Average Positive Optical Density	0.481257		Stain 1 Average Positive Optical Density	0.489203		Stain 1 Average Positive Optical Density	0.485119		Stain 1 Average Positive Optical Density	0.485119		Stain 1 Average Positive Optical Density	0.50748		Stain 1 Average Positive Optical Density	0.498872		Stain 1 Average Positive Optical Density	0.459799		Stain 1 Average Positive Optical Density	0.472476
		Stain 2 Average Positive Optical Density	0.290223		Stain 2 Average Positive Optical Density	0.381216		Stain 2 Average Positive Optical Density	0.320874		Stain 2 Average Positive Optical Density	0.320874		Stain 2 Average Positive Optical Density	0.41079		Stain 2 Average Positive Optical Density	0.293433		Stain 2 Average Positive Optical Density	0.254726		Stain 2 Average Positive Optical Density	0.422376
		% Negative Tissue	42.5165		% Negative Tissue	39.1345		% Negative Tissue	47.3305		% Negative Tissue	47.3305		% Negative Tissue	39.2018		% Negative Tissue	33.6637		% Negative Tissue	48.1915		% Negative Tissue	43.5821
		BSNA53.2a	WT
		Name	Value		Name	Value		Name	Value		Name	Value		Name	Value		Name	Value		Name	Value		Name	Value
		Tissue Area Analyzed (μm²)	391831		Tissue Area Analyzed (μm²)	199542		Tissue Area Analyzed (μm²)	382276		Tissue Area Analyzed (μm²)	427511		Tissue Area Analyzed (μm²)	407593		Tissue Area Analyzed (μm²)	510111		Tissue Area Analyzed (μm²)	373960		Tissue Area Analyzed (μm²)	611041
		Stain 1 Area (μm²)	231440		Stain 1 Area (μm²)	107970		Stain 1 Area (μm²)	211344		Stain 1 Area (μm²)	241942		Stain 1 Area (μm²)	269910		Stain 1 Area (μm²)	355251		Stain 1 Area (μm²)	256922		Stain 1 Area (μm²)	403124
		Stain 1 Weak Area (μm²)	41034.5		Stain 1 Weak Area (μm²)	18419.5		Stain 1 Weak Area (μm²)	49940.3		Stain 1 Weak Area (μm²)	60685.5		Stain 1 Weak Area (μm²)	57103.2		Stain 1 Weak Area (μm²)	64155.8		Stain 1 Weak Area (μm²)	45433.1		Stain 1 Weak Area (μm²)	76742
		Stain 1 Moderate Area (μm²)	34700.7		Stain 1 Moderate Area (μm²)	15148.4		Stain 1 Moderate Area (μm²)	37872.5		Stain 1 Moderate Area (μm²)	51263		Stain 1 Moderate Area (μm²)	44704.5		Stain 1 Moderate Area (μm²)	55745.9		Stain 1 Moderate Area (μm²)	34656.8		Stain 1 Moderate Area (μm²)	67471.3
		Stain 1 Strong Area (μm²)	155704		Stain 1 Strong Area (μm²)	74401.5		Stain 1 Strong Area (μm²)	123531		Stain 1 Strong Area (μm²)	129994		Stain 1 Strong Area (μm²)	168102		Stain 1 Strong Area (μm²)	235349		Stain 1 Strong Area (μm²)	176832		Stain 1 Strong Area (μm²)	258910
		Stain 2 Area (μm²)	56273		Stain 2 Area (μm²)	60595.4		Stain 2 Area (μm²)	100093		Stain 2 Area (μm²)	116966		Stain 2 Area (μm²)	90121.5		Stain 2 Area (μm²)	64616.5		Stain 2 Area (μm²)	31539.2		Stain 2 Area (μm²)	111487
		Stain 2 Weak Area (μm²)	24031.7		Stain 2 Weak Area (μm²)	20225.4		Stain 2 Weak Area (μm²)	32178.3		Stain 2 Weak Area (μm²)	35522.2		Stain 2 Weak Area (μm²)	32700.2		Stain 2 Weak Area (μm²)	23931.3		Stain 2 Weak Area (μm²)	14437.7		Stain 2 Weak Area (μm²)	31564.1
		Stain 2 Moderate Area (μm²)	12282		Stain 2 Moderate Area (μm²)	13444.7		Stain 2 Moderate Area (μm²)	18984.2		Stain 2 Moderate Area (μm²)	27100.2		Stain 2 Moderate Area (μm²)	20790		Stain 2 Moderate Area (μm²)	13867.3		Stain 2 Moderate Area (μm²)	7072.8		Stain 2 Moderate Area (μm²)	23358.5
		Stain 2 Strong Area (μm²)	19959.3		Stain 2 Strong Area (μm²)	26925.3		Stain 2 Strong Area (μm²)	48930.6		Stain 2 Strong Area (μm²)	54343.6		Stain 2 Strong Area (μm²)	36631.2		Stain 2 Strong Area (μm²)	26817.9		Stain 2 Strong Area (μm²)	10028.7		Stain 2 Strong Area (μm²)	56563.9
		% Stain 1 Positive Tissue	59.0662		% Stain 1 Positive Tissue	54.1087		% Stain 1 Positive Tissue	55.2857		% Stain 1 Positive Tissue	56.5932		% Stain 1 Positive Tissue	66.2203		% Stain 1 Positive Tissue	69.6419		% Stain 1 Positive Tissue	68.703		% Stain 1 Positive Tissue	65.9733
		% Stain 1 Positive Tissue (weak)	10.4725		% Stain 1 Positive Tissue (weak)	9.23092		% Stain 1 Positive Tissue (weak)	13.0639		% Stain 1 Positive Tissue (weak)	14.1951		% Stain 1 Positive Tissue (weak)	14.0098		% Stain 1 Positive Tissue (weak)	12.5768		% Stain 1 Positive Tissue (weak)	12.1492		% Stain 1 Positive Tissue (weak)	12.5592
		% Stain 1 Positive Tissue (moderate)	8.85604		% Stain 1 Positive Tissue (moderate)	7.5916		% Stain 1 Positive Tissue (moderate)	9.9071		% Stain 1 Positive Tissue (moderate)	11.991		% Stain 1 Positive Tissue (moderate)	10.9679		% Stain 1 Positive Tissue (moderate)	10.9282		% Stain 1 Positive Tissue (moderate)	9.26752		% Stain 1 Positive Tissue (moderate)	11.042
		% Stain 1 Positive Tissue (strong)	39.7377		% Stain 1 Positive Tissue (strong)	37.2862		% Stain 1 Positive Tissue (strong)	32.3147		% Stain 1 Positive Tissue (strong)	30.4071		% Stain 1 Positive Tissue (strong)	41.2425		% Stain 1 Positive Tissue (strong)	46.1369		% Stain 1 Positive Tissue (strong)	47.2863		% Stain 1 Positive Tissue (strong)	42.372
		% Stain 2 Positive Tissue	14.3616		% Stain 2 Positive Tissue	30.3673		% Stain 2 Positive Tissue	26.1835		% Stain 2 Positive Tissue	27.3597		% Stain 2 Positive Tissue	22.1106		% Stain 2 Positive Tissue	12.6671		% Stain 2 Positive Tissue	8.43386		% Stain 2 Positive Tissue	18.2454		19.9661
		% Stain 2 Positive Tissue (weak)	6.13319		% Stain 2 Positive Tissue (weak)	10.1359		% Stain 2 Positive Tissue (weak)	8.41757		% Stain 2 Positive Tissue (weak)	8.30907		% Stain 2 Positive Tissue (weak)	8.02276		% Stain 2 Positive Tissue (weak)	4.69139		% Stain 2 Positive Tissue (weak)	3.86077		% Stain 2 Positive Tissue (weak)	5.16562
		% Stain 2 Positive Tissue (moderate)	3.13452		% Stain 2 Positive Tissue (moderate)	6.7378		% Stain 2 Positive Tissue (moderate)	4.96609		% Stain 2 Positive Tissue (moderate)	6.33906		% Stain 2 Positive Tissue (moderate)	5.10068		% Stain 2 Positive Tissue (moderate)	2.71849		% Stain 2 Positive Tissue (moderate)	1.89133		% Stain 2 Positive Tissue (moderate)	3.82275
		% Stain 2 Positive Tissue (strong)	5.09385		% Stain 2 Positive Tissue (strong)	13.4935		% Stain 2 Positive Tissue (strong)	12.7998		% Stain 2 Positive Tissue (strong)	12.7116		% Stain 2 Positive Tissue (strong)	8.9872		% Stain 2 Positive Tissue (strong)	5.25727		% Stain 2 Positive Tissue (strong)	2.68176		% Stain 2 Positive Tissue (strong)	9.25698
		Stain 1 Average Positive Optical Density	0.564293		Stain 1 Average Positive Optical Density	0.605764		Stain 1 Average Positive Optical Density	0.527511		Stain 1 Average Positive Optical Density	0.471495		Stain 1 Average Positive Optical Density	0.536307		Stain 1 Average Positive Optical Density	0.567232		Stain 1 Average Positive Optical Density	0.616054		Stain 1 Average Positive Optical Density	0.547149
		Stain 2 Average Positive Optical Density	0.355765		Stain 2 Average Positive Optical Density	0.393805		Stain 2 Average Positive Optical Density	0.44007		Stain 2 Average Positive Optical Density	0.38804		Stain 2 Average Positive Optical Density	0.367908		Stain 2 Average Positive Optical Density	0.374546		Stain 2 Average Positive Optical Density	0.333581		Stain 2 Average Positive Optical Density	0.41693
		% Negative Tissue	32.3817		% Negative Tissue	25.1996		% Negative Tissue	27.3007		% Negative Tissue	24.1993		% Negative Tissue	22.6817		% Negative Tissue	23.4155		% Negative Tissue	27.9704		% Negative Tissue	23.7188
		BSNA84.3c	WT
		Name	Value		Name	Value		Name	Value		Name	Value		Name	Value		Name	Value		Name	Value		Name	Value
		Tissue Area Analyzed (μm²)	419042		Tissue Area Analyzed (μm²)	421270		Tissue Area Analyzed (μm²)	427026		Tissue Area Analyzed (μm²)	314868		Tissue Area Analyzed (μm²)	474194		Tissue Area Analyzed (μm²)	420083		Tissue Area Analyzed (μm²)	533734		Tissue Area Analyzed (μm²)	400786
		Stain 1 Area (μm²)	209073		Stain 1 Area (μm²)	186848		Stain 1 Area (μm²)	148763		Stain 1 Area (μm²)	109007		Stain 1 Area (μm²)	225405		Stain 1 Area (μm²)	164012		Stain 1 Area (μm²)	285387		Stain 1 Area (μm²)	193535
		Stain 1 Weak Area (μm²)	75215.6		Stain 1 Weak Area (μm²)	58862.3		Stain 1 Weak Area (μm²)	53369.6		Stain 1 Weak Area (μm²)	38090.1		Stain 1 Weak Area (μm²)	77810.1		Stain 1 Weak Area (μm²)	46429		Stain 1 Weak Area (μm²)	99836.1		Stain 1 Weak Area (μm²)	61228.7
		Stain 1 Moderate Area (μm²)	40275.9		Stain 1 Moderate Area (μm²)	33352.6		Stain 1 Moderate Area (μm²)	27324.2		Stain 1 Moderate Area (μm²)	20042.4		Stain 1 Moderate Area (μm²)	41601.4		Stain 1 Moderate Area (μm²)	31358		Stain 1 Moderate Area (μm²)	60782.5		Stain 1 Moderate Area (μm²)	37799.7
		Stain 1 Strong Area (μm²)	93581.4		Stain 1 Strong Area (μm²)	94632.7		Stain 1 Strong Area (μm²)	68069.4		Stain 1 Strong Area (μm²)	50874.4		Stain 1 Strong Area (μm²)	105993		Stain 1 Strong Area (μm²)	86224.6		Stain 1 Strong Area (μm²)	124768		Stain 1 Strong Area (μm²)	94506.9
		Stain 2 Area (μm²)	18685.1		Stain 2 Area (μm²)	32213.6		Stain 2 Area (μm²)	98410.2		Stain 2 Area (μm²)	47666.8		Stain 2 Area (μm²)	35416.6		Stain 2 Area (μm²)	76876.5		Stain 2 Area (μm²)	43404.4		Stain 2 Area (μm²)	70925.5
		Stain 2 Weak Area (μm²)	9212.94		Stain 2 Weak Area (μm²)	15259.3		Stain 2 Weak Area (μm²)	38681.9		Stain 2 Weak Area (μm²)	22882.3		Stain 2 Weak Area (μm²)	13522.7		Stain 2 Weak Area (μm²)	23738.4		Stain 2 Weak Area (μm²)	16945.6		Stain 2 Weak Area (μm²)	20725.4
		Stain 2 Moderate Area (μm²)	4044.16		Stain 2 Moderate Area (μm²)	7452.1		Stain 2 Moderate Area (μm²)	23425.5		Stain 2 Moderate Area (μm²)	10074.9		Stain 2 Moderate Area (μm²)	7232.72		Stain 2 Moderate Area (μm²)	17169.1		Stain 2 Moderate Area (μm²)	9442.72		Stain 2 Moderate Area (μm²)	14465.4
		Stain 2 Strong Area (μm²)	5428		Stain 2 Strong Area (μm²)	9502.18		Stain 2 Strong Area (μm²)	36302.7		Stain 2 Strong Area (μm²)	14709.7		Stain 2 Strong Area (μm²)	14661.2		Stain 2 Strong Area (μm²)	35969		Stain 2 Strong Area (μm²)	17016.1		Stain 2 Strong Area (μm²)	35734.7
		% Stain 1 Positive Tissue	49.8931		% Stain 1 Positive Tissue	44.3534		% Stain 1 Positive Tissue	34.837		% Stain 1 Positive Tissue	34.6199		% Stain 1 Positive Tissue	47.5343		% Stain 1 Positive Tissue	39.0426		% Stain 1 Positive Tissue	53.4699		% Stain 1 Positive Tissue	48.2889
		% Stain 1 Positive Tissue (weak)	17.9494		% Stain 1 Positive Tissue (weak)	13.9726		% Stain 1 Positive Tissue (weak)	12.498		% Stain 1 Positive Tissue (weak)	12.0972		% Stain 1 Positive Tissue (weak)	16.4089		% Stain 1 Positive Tissue (weak)	11.0523		% Stain 1 Positive Tissue (weak)	18.7052		% Stain 1 Positive Tissue (weak)	15.2772
		% Stain 1 Positive Tissue (moderate)	9.61143		% Stain 1 Positive Tissue (moderate)	7.91715		% Stain 1 Positive Tissue (moderate)	6.39872		% Stain 1 Positive Tissue (moderate)	6.36534		% Stain 1 Positive Tissue (moderate)	8.77308		% Stain 1 Positive Tissue (moderate)	7.4647		% Stain 1 Positive Tissue (moderate)	11.3882		% Stain 1 Positive Tissue (moderate)	9.4314
		% Stain 1 Positive Tissue (strong)	22.3322		% Stain 1 Positive Tissue (strong)	22.4637		% Stain 1 Positive Tissue (strong)	15.9403		% Stain 1 Positive Tissue (strong)	16.1574		% Stain 1 Positive Tissue (strong)	22.3523		% Stain 1 Positive Tissue (strong)	20.5256		% Stain 1 Positive Tissue (strong)	23.3765		% Stain 1 Positive Tissue (strong)	23.5804
		% Stain 2 Positive Tissue	4.45901		% Stain 2 Positive Tissue	7.64677		% Stain 2 Positive Tissue	23.0455		% Stain 2 Positive Tissue	15.1387		% Stain 2 Positive Tissue	7.46879		% Stain 2 Positive Tissue	18.3003		% Stain 2 Positive Tissue	8.13222		% Stain 2 Positive Tissue	17.6966		12.736
		% Stain 2 Positive Tissue (weak)	2.19857		% Stain 2 Positive Tissue (weak)	3.6222		% Stain 2 Positive Tissue (weak)	9.05844		% Stain 2 Positive Tissue (weak)	7.26726		% Stain 2 Positive Tissue (weak)	2.85172		% Stain 2 Positive Tissue (weak)	5.65089		% Stain 2 Positive Tissue (weak)	3.17492		% Stain 2 Positive Tissue (weak)	5.17118
		% Stain 2 Positive Tissue (moderate)	0.965097		% Stain 2 Positive Tissue (moderate)	1.76896		% Stain 2 Positive Tissue (moderate)	5.48573		% Stain 2 Positive Tissue (moderate)	3.19972		% Stain 2 Positive Tissue (moderate)	1.52527		% Stain 2 Positive Tissue (moderate)	4.08706		% Stain 2 Positive Tissue (moderate)	1.76918		% Stain 2 Positive Tissue (moderate)	3.60927
		% Stain 2 Positive Tissue (strong)	1.29534		% Stain 2 Positive Tissue (strong)	2.2556		% Stain 2 Positive Tissue (strong)	8.50129		% Stain 2 Positive Tissue (strong)	4.67169		% Stain 2 Positive Tissue (strong)	3.0918		% Stain 2 Positive Tissue (strong)	8.56236		% Stain 2 Positive Tissue (strong)	3.18812		% Stain 2 Positive Tissue (strong)	8.91614
		Stain 1 Average Positive Optical Density	0.412031		Stain 1 Average Positive Optical Density	0.437827		Stain 1 Average Positive Optical Density	0.406229		Stain 1 Average Positive Optical Density	0.413328		Stain 1 Average Positive Optical Density	0.411141		Stain 1 Average Positive Optical Density	0.450022		Stain 1 Average Positive Optical Density	0.420708		Stain 1 Average Positive Optical Density	0.428434
		Stain 2 Average Positive Optical Density	0.315718		Stain 2 Average Positive Optical Density	0.315454		Stain 2 Average Positive Optical Density	0.348417		Stain 2 Average Positive Optical Density	0.330299		Stain 2 Average Positive Optical Density	0.370901		Stain 2 Average Positive Optical Density	0.399668		Stain 2 Average Positive Optical Density	0.36098		Stain 2 Average Positive Optical Density	0.422032
		% Negative Tissue	47.616		% Negative Tissue	51.2487		% Negative Tissue	46.46		% Negative Tissue	54.2712		% Negative Tissue	48.0511		% Negative Tissue	47.3558		% Negative Tissue	41.6038		% Negative Tissue	39.6159
		BSNA64.1e	HOM
		Name	Value		Name	Value		Name	Value		Name	Value		Name	Value		Name	Value		Name	Value		Name	Value
		Tissue Area Analyzed (μm²)	502525		Tissue Area Analyzed (μm²)	535617		Tissue Area Analyzed (μm²)	490056		Tissue Area Analyzed (μm²)	497867		Tissue Area Analyzed (μm²)	399487		Tissue Area Analyzed (μm²)	492334		Tissue Area Analyzed (μm²)	426627		Tissue Area Analyzed (μm²)	306811
		Stain 1 Area (μm²)	296795		Stain 1 Area (μm²)	288840		Stain 1 Area (μm²)	226808		Stain 1 Area (μm²)	180968		Stain 1 Area (μm²)	192250		Stain 1 Area (μm²)	207228		Stain 1 Area (μm²)	181129		Stain 1 Area (μm²)	166147
		Stain 1 Weak Area (μm²)	68648.5		Stain 1 Weak Area (μm²)	66581.7		Stain 1 Weak Area (μm²)	58786.6		Stain 1 Weak Area (μm²)	47285.2		Stain 1 Weak Area (μm²)	49164.4		Stain 1 Weak Area (μm²)	56725		Stain 1 Weak Area (μm²)	47964.1		Stain 1 Weak Area (μm²)	35174.1
		Stain 1 Moderate Area (μm²)	51586.3		Stain 1 Moderate Area (μm²)	46430.7		Stain 1 Moderate Area (μm²)	40793.8		Stain 1 Moderate Area (μm²)	29474.7		Stain 1 Moderate Area (μm²)	29461.4		Stain 1 Moderate Area (μm²)	35433.3		Stain 1 Moderate Area (μm²)	30548.5		Stain 1 Moderate Area (μm²)	28722.5
		Stain 1 Strong Area (μm²)	176560		Stain 1 Strong Area (μm²)	175827		Stain 1 Strong Area (μm²)	127228		Stain 1 Strong Area (μm²)	104208		Stain 1 Strong Area (μm²)	113624		Stain 1 Strong Area (μm²)	115070		Stain 1 Strong Area (μm²)	102616		Stain 1 Strong Area (μm²)	102251
		Stain 2 Area (μm²)	25205.4		Stain 2 Area (μm²)	71655.8		Stain 2 Area (μm²)	124559		Stain 2 Area (μm²)	102252		Stain 2 Area (μm²)	63535.7		Stain 2 Area (μm²)	113652		Stain 2 Area (μm²)	66262.4		Stain 2 Area (μm²)	60170.5
		Stain 2 Weak Area (μm²)	10726.1		Stain 2 Weak Area (μm²)	16095.2		Stain 2 Weak Area (μm²)	34668.3		Stain 2 Weak Area (μm²)	25339.3		Stain 2 Weak Area (μm²)	20898.6		Stain 2 Weak Area (μm²)	27399.2		Stain 2 Weak Area (μm²)	15933.6		Stain 2 Weak Area (μm²)	20926.9
		Stain 2 Moderate Area (μm²)	4872.62		Stain 2 Moderate Area (μm²)	12802.2		Stain 2 Moderate Area (μm²)	24515.5		Stain 2 Moderate Area (μm²)	20439		Stain 2 Moderate Area (μm²)	14635.8		Stain 2 Moderate Area (μm²)	25085.9		Stain 2 Moderate Area (μm²)	13268.1		Stain 2 Moderate Area (μm²)	12731.2
		Stain 2 Strong Area (μm²)	9606.68		Stain 2 Strong Area (μm²)	42758.4		Stain 2 Strong Area (μm²)	65375.6		Stain 2 Strong Area (μm²)	56473.9		Stain 2 Strong Area (μm²)	28001.4		Stain 2 Strong Area (μm²)	61167		Stain 2 Strong Area (μm²)	37060.8		Stain 2 Strong Area (μm²)	26512.5
		% Stain 1 Positive Tissue	59.0607		% Stain 1 Positive Tissue	53.9265		% Stain 1 Positive Tissue	46.2821		% Stain 1 Positive Tissue	36.3487		% Stain 1 Positive Tissue	48.1242		% Stain 1 Positive Tissue	42.091		% Stain 1 Positive Tissue	42.4559		% Stain 1 Positive Tissue	54.1529
		% Stain 1 Positive Tissue (weak)	13.6607		% Stain 1 Positive Tissue (weak)	12.4308		% Stain 1 Positive Tissue (weak)	11.9959		% Stain 1 Positive Tissue (weak)	9.49755		% Stain 1 Positive Tissue (weak)	12.3069		% Stain 1 Positive Tissue (weak)	11.5216		% Stain 1 Positive Tissue (weak)	11.2426		% Stain 1 Positive Tissue (weak)	11.4644
		% Stain 1 Positive Tissue (moderate)	10.2654		% Stain 1 Positive Tissue (moderate)	8.66864		% Stain 1 Positive Tissue (moderate)	8.3243		% Stain 1 Positive Tissue (moderate)	5.9202		% Stain 1 Positive Tissue (moderate)	7.37483		% Stain 1 Positive Tissue (moderate)	7.197		% Stain 1 Positive Tissue (moderate)	7.16048		% Stain 1 Positive Tissue (moderate)	9.36162
		% Stain 1 Positive Tissue (strong)	35.1346		% Stain 1 Positive Tissue (strong)	32.827		% Stain 1 Positive Tissue (strong)	25.9619		% Stain 1 Positive Tissue (strong)	20.9309		% Stain 1 Positive Tissue (strong)	28.4425		% Stain 1 Positive Tissue (strong)	23.3723		% Stain 1 Positive Tissue (strong)	24.0528		% Stain 1 Positive Tissue (strong)	33.3269
		% Stain 2 Positive Tissue	5.01575		% Stain 2 Positive Tissue	13.3782		% Stain 2 Positive Tissue	25.4174		% Stain 2 Positive Tissue	20.5381		% Stain 2 Positive Tissue	15.9043		% Stain 2 Positive Tissue	23.0843		% Stain 2 Positive Tissue	15.5317		% Stain 2 Positive Tissue	19.6116		17.3102
		% Stain 2 Positive Tissue (weak)	2.13444		% Stain 2 Positive Tissue (weak)	3.00499		% Stain 2 Positive Tissue (weak)	7.07436		% Stain 2 Positive Tissue (weak)	5.08958		% Stain 2 Positive Tissue (weak)	5.23136		% Stain 2 Positive Tissue (weak)	5.56517		% Stain 2 Positive Tissue (weak)	3.73478		% Stain 2 Positive Tissue (weak)	6.82076
		% Stain 2 Positive Tissue (moderate)	0.969627		% Stain 2 Positive Tissue (moderate)	2.39017		% Stain 2 Positive Tissue (moderate)	5.00259		% Stain 2 Positive Tissue (moderate)	4.10531		% Stain 2 Positive Tissue (moderate)	3.66364		% Stain 2 Positive Tissue (moderate)	5.0953		% Stain 2 Positive Tissue (moderate)	3.10999		% Stain 2 Positive Tissue (moderate)	4.14951
		% Stain 2 Positive Tissue (strong)	1.91168		% Stain 2 Positive Tissue (strong)	7.98301		% Stain 2 Positive Tissue (strong)	13.3404		% Stain 2 Positive Tissue (strong)	11.3432		% Stain 2 Positive Tissue (strong)	7.00934		% Stain 2 Positive Tissue (strong)	12.4239		% Stain 2 Positive Tissue (strong)	8.68692		% Stain 2 Positive Tissue (strong)	8.6413
		Stain 1 Average Positive Optical Density	0.509822		Stain 1 Average Positive Optical Density	0.526297		Stain 1 Average Positive Optical Density	0.519508		Stain 1 Average Positive Optical Density	0.501875		Stain 1 Average Positive Optical Density	0.531904		Stain 1 Average Positive Optical Density	0.470932		Stain 1 Average Positive Optical Density	0.480713		Stain 1 Average Positive Optical Density	0.517777
		Stain 2 Average Positive Optical Density	0.376954		Stain 2 Average Positive Optical Density	0.467994		Stain 2 Average Positive Optical Density	0.443338		Stain 2 Average Positive Optical Density	0.432141		Stain 2 Average Positive Optical Density	0.376703		Stain 2 Average Positive Optical Density	0.416563		Stain 2 Average Positive Optical Density	0.444068		Stain 2 Average Positive Optical Density	0.402624
		% Negative Tissue	38.0963		% Negative Tissue	37.9282		% Negative Tissue	35.3415		% Negative Tissue	49.1198		% Negative Tissue	43.3269		% Negative Tissue	42.5651		% Negative Tissue	46.8564		% Negative Tissue	32.9127
		BSNA71.1d	WT
		Name	Value		Name	Value		Name	Value		Name	Value		Name	Value		Name	Value		Name	Value		Name	Value
		Tissue Area Analyzed (μm²)	435936		Tissue Area Analyzed (μm²)	556786		Tissue Area Analyzed (μm²)	414620		Tissue Area Analyzed (μm²)	327744		Tissue Area Analyzed (μm²)	450810		Tissue Area Analyzed (μm²)	336340		Tissue Area Analyzed (μm²)	497329		Tissue Area Analyzed (μm²)	406114
		Stain 1 Area (μm²)	200306		Stain 1 Area (μm²)	266765		Stain 1 Area (μm²)	211511		Stain 1 Area (μm²)	195777		Stain 1 Area (μm²)	205606		Stain 1 Area (μm²)	160559		Stain 1 Area (μm²)	256177		Stain 1 Area (μm²)	234506
		Stain 1 Weak Area (μm²)	49528.7		Stain 1 Weak Area (μm²)	68309.6		Stain 1 Weak Area (μm²)	57055.8		Stain 1 Weak Area (μm²)	50099.6		Stain 1 Weak Area (μm²)	49035.6		Stain 1 Weak Area (μm²)	37703.3		Stain 1 Weak Area (μm²)	64514.3		Stain 1 Weak Area (μm²)	59605.3
		Stain 1 Moderate Area (μm²)	32476.2		Stain 1 Moderate Area (μm²)	47280.6		Stain 1 Moderate Area (μm²)	37747.8		Stain 1 Moderate Area (μm²)	37217.2		Stain 1 Moderate Area (μm²)	34984.1		Stain 1 Moderate Area (μm²)	24470.5		Stain 1 Moderate Area (μm²)	44160.1		Stain 1 Moderate Area (μm²)	38929.6
		Stain 1 Strong Area (μm²)	118301		Stain 1 Strong Area (μm²)	151175		Stain 1 Strong Area (μm²)	116707		Stain 1 Strong Area (μm²)	108460		Stain 1 Strong Area (μm²)	121586		Stain 1 Strong Area (μm²)	98385.3		Stain 1 Strong Area (μm²)	147502		Stain 1 Strong Area (μm²)	135971
		Stain 2 Area (μm²)	83661.8		Stain 2 Area (μm²)	77484.5		Stain 2 Area (μm²)	44941.8		Stain 2 Area (μm²)	35285.5		Stain 2 Area (μm²)	89376.2		Stain 2 Area (μm²)	29349.4		Stain 2 Area (μm²)	69031.8		Stain 2 Area (μm²)	50909.1
		Stain 2 Weak Area (μm²)	25700.8		Stain 2 Weak Area (μm²)	18388.9		Stain 2 Weak Area (μm²)	16950.2		Stain 2 Weak Area (μm²)	15588.3		Stain 2 Weak Area (μm²)	28591.4		Stain 2 Weak Area (μm²)	13500.2		Stain 2 Weak Area (μm²)	29132.9		Stain 2 Weak Area (μm²)	20229.5
		Stain 2 Moderate Area (μm²)	17162.7		Stain 2 Moderate Area (μm²)	11417.2		Stain 2 Moderate Area (μm²)	9566.84		Stain 2 Moderate Area (μm²)	7782.91		Stain 2 Moderate Area (μm²)	18532.7		Stain 2 Moderate Area (μm²)	6358.65		Stain 2 Moderate Area (μm²)	15724.6		Stain 2 Moderate Area (μm²)	11173.5
		Stain 2 Strong Area (μm²)	40798.4		Stain 2 Strong Area (μm²)	47678.3		Stain 2 Strong Area (μm²)	18424.7		Stain 2 Strong Area (μm²)	11914.2		Stain 2 Strong Area (μm²)	42252.1		Stain 2 Strong Area (μm²)	9490.64		Stain 2 Strong Area (μm²)	24174.3		Stain 2 Strong Area (μm²)	19506.1
		% Stain 1 Positive Tissue	45.9484		% Stain 1 Positive Tissue	47.9116		% Stain 1 Positive Tissue	51.0132		% Stain 1 Positive Tissue	59.7348		% Stain 1 Positive Tissue	45.6081		% Stain 1 Positive Tissue	47.7372		% Stain 1 Positive Tissue	51.5106		% Stain 1 Positive Tissue	57.7438
		% Stain 1 Positive Tissue (weak)	11.3615		% Stain 1 Positive Tissue (weak)	12.2686		% Stain 1 Positive Tissue (weak)	13.761		% Stain 1 Positive Tissue (weak)	15.2862		% Stain 1 Positive Tissue (weak)	10.8772		% Stain 1 Positive Tissue (weak)	11.2099		% Stain 1 Positive Tissue (weak)	12.9722		% Stain 1 Positive Tissue (weak)	14.677
		% Stain 1 Positive Tissue (moderate)	7.44977		% Stain 1 Positive Tissue (moderate)	8.49169		% Stain 1 Positive Tissue (moderate)	9.10419		% Stain 1 Positive Tissue (moderate)	11.3556		% Stain 1 Positive Tissue (moderate)	7.76028		% Stain 1 Positive Tissue (moderate)	7.27552		% Stain 1 Positive Tissue (moderate)	8.87946		% Stain 1 Positive Tissue (moderate)	9.58587
		% Stain 1 Positive Tissue (strong)	27.1372		% Stain 1 Positive Tissue (strong)	27.1513		% Stain 1 Positive Tissue (strong)	28.148		% Stain 1 Positive Tissue (strong)	33.093		% Stain 1 Positive Tissue (strong)	26.9706		% Stain 1 Positive Tissue (strong)	29.2517		% Stain 1 Positive Tissue (strong)	29.6589		% Stain 1 Positive Tissue (strong)	33.4809
		% Stain 2 Positive Tissue	19.1913		% Stain 2 Positive Tissue	13.9164		% Stain 2 Positive Tissue	10.8393		% Stain 2 Positive Tissue	10.7662		% Stain 2 Positive Tissue	19.8257		% Stain 2 Positive Tissue	8.72612		% Stain 2 Positive Tissue	13.8805		% Stain 2 Positive Tissue	12.5356		13.7101
		% Stain 2 Positive Tissue (weak)	5.89553		% Stain 2 Positive Tissue (weak)	3.30269		% Stain 2 Positive Tissue (weak)	4.08814		% Stain 2 Positive Tissue (weak)	4.75626		% Stain 2 Positive Tissue (weak)	6.34223		% Stain 2 Positive Tissue (weak)	4.01384		% Stain 2 Positive Tissue (weak)	5.85789		% Stain 2 Positive Tissue (weak)	4.98122
		% Stain 2 Positive Tissue (moderate)	3.93698		% Stain 2 Positive Tissue (moderate)	2.05055		% Stain 2 Positive Tissue (moderate)	2.30738		% Stain 2 Positive Tissue (moderate)	2.3747		% Stain 2 Positive Tissue (moderate)	4.11097		% Stain 2 Positive Tissue (moderate)	1.89054		% Stain 2 Positive Tissue (moderate)	3.16181		% Stain 2 Positive Tissue (moderate)	2.75133
		% Stain 2 Positive Tissue (strong)	9.3588		% Stain 2 Positive Tissue (strong)	8.56313		% Stain 2 Positive Tissue (strong)	4.44376		% Stain 2 Positive Tissue (strong)	3.63523		% Stain 2 Positive Tissue (strong)	9.37247		% Stain 2 Positive Tissue (strong)	2.82174		% Stain 2 Positive Tissue (strong)	4.86083		% Stain 2 Positive Tissue (strong)	4.8031
		Stain 1 Average Positive Optical Density	0.538186		Stain 1 Average Positive Optical Density	0.492754		Stain 1 Average Positive Optical Density	0.485825		Stain 1 Average Positive Optical Density	0.480415		Stain 1 Average Positive Optical Density	0.507993		Stain 1 Average Positive Optical Density	0.554414		Stain 1 Average Positive Optical Density	0.509035		Stain 1 Average Positive Optical Density	0.526981
		Stain 2 Average Positive Optical Density	0.436306		Stain 2 Average Positive Optical Density	0.556475		Stain 2 Average Positive Optical Density	0.3797		Stain 2 Average Positive Optical Density	0.338551		Stain 2 Average Positive Optical Density	0.39306		Stain 2 Average Positive Optical Density	0.330275		Stain 2 Average Positive Optical Density	0.341819		Stain 2 Average Positive Optical Density	0.348578
		% Negative Tissue	43.0539		% Negative Tissue	43.7097		% Negative Tissue	42.464		% Negative Tissue	34.349		% Negative Tissue	42.6874		% Negative Tissue	48.4677		% Negative Tissue	40.9842		% Negative Tissue	35.5023
		BSNA80.1g	WT
		Name	Value		Name	Value		Name	Value		Name	Value		Name	Value		Name	Value		Name	Value		Name	Value
		Tissue Area Analyzed (μm²)	374585		Tissue Area Analyzed (μm²)	483028		Tissue Area Analyzed (μm²)	477276		Tissue Area Analyzed (μm²)	534775		Tissue Area Analyzed (μm²)	553978		Tissue Area Analyzed (μm²)	427117		Tissue Area Analyzed (μm²)	622244		Tissue Area Analyzed (μm²)	470993
		Stain 1 Area (μm²)	309307		Stain 1 Area (μm²)	377183		Stain 1 Area (μm²)	335549		Stain 1 Area (μm²)	414214		Stain 1 Area (μm²)	268771		Stain 1 Area (μm²)	250166		Stain 1 Area (μm²)	405891		Stain 1 Area (μm²)	266570
		Stain 1 Weak Area (μm²)	40730.8		Stain 1 Weak Area (μm²)	73835.2		Stain 1 Weak Area (μm²)	60732.8		Stain 1 Weak Area (μm²)	71278.8		Stain 1 Weak Area (μm²)	76019.2		Stain 1 Weak Area (μm²)	63551.3		Stain 1 Weak Area (μm²)	112285		Stain 1 Weak Area (μm²)	54959
		Stain 1 Moderate Area (μm²)	42832.9		Stain 1 Moderate Area (μm²)	67008.3		Stain 1 Moderate Area (μm²)	54443.4		Stain 1 Moderate Area (μm²)	63410.4		Stain 1 Moderate Area (μm²)	44228.8		Stain 1 Moderate Area (μm²)	40026.5		Stain 1 Moderate Area (μm²)	63964.7		Stain 1 Moderate Area (μm²)	45049.2
		Stain 1 Strong Area (μm²)	225744		Stain 1 Strong Area (μm²)	236340		Stain 1 Strong Area (μm²)	220373		Stain 1 Strong Area (μm²)	279524		Stain 1 Strong Area (μm²)	148523		Stain 1 Strong Area (μm²)	146588		Stain 1 Strong Area (μm²)	229641		Stain 1 Strong Area (μm²)	166562
		Stain 2 Area (μm²)	32580.2		Stain 2 Area (μm²)	48033.4		Stain 2 Area (μm²)	82891.7		Stain 2 Area (μm²)	76350.6		Stain 2 Area (μm²)	245043		Stain 2 Area (μm²)	207464		Stain 2 Area (μm²)	181565		Stain 2 Area (μm²)	130744
		Stain 2 Weak Area (μm²)	15821.6		Stain 2 Weak Area (μm²)	16618.3		Stain 2 Weak Area (μm²)	24136.8		Stain 2 Weak Area (μm²)	23833.1		Stain 2 Weak Area (μm²)	52532.5		Stain 2 Weak Area (μm²)	38998.8		Stain 2 Weak Area (μm²)	70606.8		Stain 2 Weak Area (μm²)	27615.2
		Stain 2 Moderate Area (μm²)	8305.97		Stain 2 Moderate Area (μm²)	9650.56		Stain 2 Moderate Area (μm²)	17628.6		Stain 2 Moderate Area (μm²)	17540.3		Stain 2 Moderate Area (μm²)	43933.8		Stain 2 Moderate Area (μm²)	36975.3		Stain 2 Moderate Area (μm²)	45595.4		Stain 2 Moderate Area (μm²)	20290.6
		Stain 2 Strong Area (μm²)	8452.61		Stain 2 Strong Area (μm²)	21764.6		Stain 2 Strong Area (μm²)	41126.3		Stain 2 Strong Area (μm²)	34977.2		Stain 2 Strong Area (μm²)	148577		Stain 2 Strong Area (μm²)	131490		Stain 2 Strong Area (μm²)	65362.4		Stain 2 Strong Area (μm²)	82838.6
		% Stain 1 Positive Tissue	82.5733		% Stain 1 Positive Tissue	78.0872		% Stain 1 Positive Tissue	70.3051		% Stain 1 Positive Tissue	77.4557		% Stain 1 Positive Tissue	48.5166		% Stain 1 Positive Tissue	58.5709		% Stain 1 Positive Tissue	65.2302		% Stain 1 Positive Tissue	56.5975
		% Stain 1 Positive Tissue (weak)	10.8736		% Stain 1 Positive Tissue (weak)	15.2859		% Stain 1 Positive Tissue (weak)	12.7249		% Stain 1 Positive Tissue (weak)	13.3287		% Stain 1 Positive Tissue (weak)	13.7224		% Stain 1 Positive Tissue (weak)	14.8791		% Stain 1 Positive Tissue (weak)	18.0452		% Stain 1 Positive Tissue (weak)	11.6687
		% Stain 1 Positive Tissue (moderate)	11.4347		% Stain 1 Positive Tissue (moderate)	13.8725		% Stain 1 Positive Tissue (moderate)	11.4071		% Stain 1 Positive Tissue (moderate)	11.8574		% Stain 1 Positive Tissue (moderate)	7.98386		% Stain 1 Positive Tissue (moderate)	9.37132		% Stain 1 Positive Tissue (moderate)	10.2797		% Stain 1 Positive Tissue (moderate)	9.56472
		% Stain 1 Positive Tissue (strong)	60.2649		% Stain 1 Positive Tissue (strong)	48.9288		% Stain 1 Positive Tissue (strong)	46.1731		% Stain 1 Positive Tissue (strong)	52.2695		% Stain 1 Positive Tissue (strong)	26.8103		% Stain 1 Positive Tissue (strong)	34.3205		% Stain 1 Positive Tissue (strong)	36.9053		% Stain 1 Positive Tissue (strong)	35.364
		% Stain 2 Positive Tissue	8.69766		% Stain 2 Positive Tissue	9.94422		% Stain 2 Positive Tissue	17.3677		% Stain 2 Positive Tissue	14.2771		% Stain 2 Positive Tissue	44.2334		% Stain 2 Positive Tissue	48.5731		% Stain 2 Positive Tissue	29.179		% Stain 2 Positive Tissue	27.7593
		% Stain 2 Positive Tissue (weak)	4.22376		% Stain 2 Positive Tissue (weak)	3.44044		% Stain 2 Positive Tissue (weak)	5.0572		% Stain 2 Positive Tissue (weak)	4.45666		% Stain 2 Positive Tissue (weak)	9.48277		% Stain 2 Positive Tissue (weak)	9.13072		% Stain 2 Positive Tissue (weak)	11.3471		% Stain 2 Positive Tissue (weak)	5.86317		6.62523
		% Stain 2 Positive Tissue (moderate)	2.21738		% Stain 2 Positive Tissue (moderate)	1.99793		% Stain 2 Positive Tissue (moderate)	3.69359		% Stain 2 Positive Tissue (moderate)	3.27993		% Stain 2 Positive Tissue (moderate)	7.93061		% Stain 2 Positive Tissue (moderate)	8.65696		% Stain 2 Positive Tissue (moderate)	7.32757		% Stain 2 Positive Tissue (moderate)	4.30805
		% Stain 2 Positive Tissue (strong)	2.25652		% Stain 2 Positive Tissue (strong)	4.50586		% Stain 2 Positive Tissue (strong)	8.61688		% Stain 2 Positive Tissue (strong)	6.54054		% Stain 2 Positive Tissue (strong)	26.82		% Stain 2 Positive Tissue (strong)	30.7854		% Stain 2 Positive Tissue (strong)	10.5043		% Stain 2 Positive Tissue (strong)	17.588
		Stain 1 Average Positive Optical Density	0.56518		Stain 1 Average Positive Optical Density	0.537733		Stain 1 Average Positive Optical Density	0.54318		Stain 1 Average Positive Optical Density	0.54311		Stain 1 Average Positive Optical Density	0.496052		Stain 1 Average Positive Optical Density	0.531462		Stain 1 Average Positive Optical Density	0.514931		Stain 1 Average Positive Optical Density	0.513421
		Stain 2 Average Positive Optical Density	0.29562		Stain 2 Average Positive Optical Density	0.400922		Stain 2 Average Positive Optical Density	0.413129		Stain 2 Average Positive Optical Density	0.373232		Stain 2 Average Positive Optical Density	0.476364		Stain 2 Average Positive Optical Density	0.483745		Stain 2 Average Positive Optical Density	0.337055		Stain 2 Average Positive Optical Density	0.485583
		% Negative Tissue	13.0856		% Negative Tissue	17.9044		% Negative Tissue	20.5426		% Negative Tissue	15.5075		% Negative Tissue	24.0594		% Negative Tissue	16.802		% Negative Tissue	20.8902		% Negative Tissue	25.2829
		BSNA64.1f	HOM
		Name	Value		Name	Value		Name	Value		Name	Value		Name	Value		Name	Value		Name	Value		Name	Value
		Tissue Area Analyzed (μm²)	498271		Tissue Area Analyzed (μm²)	212267		Tissue Area Analyzed (μm²)	465191		Tissue Area Analyzed (μm²)	179452		Tissue Area Analyzed (μm²)	457014		Tissue Area Analyzed (μm²)	479280		Tissue Area Analyzed (μm²)	602065		Tissue Area Analyzed (μm²)	344395
		Stain 1 Area (μm²)	230847		Stain 1 Area (μm²)	67452.3		Stain 1 Area (μm²)	274068		Stain 1 Area (μm²)	120994		Stain 1 Area (μm²)	267653		Stain 1 Area (μm²)	319478		Stain 1 Area (μm²)	389545		Stain 1 Area (μm²)	245736
		Stain 1 Weak Area (μm²)	62581.4		Stain 1 Weak Area (μm²)	17467.5		Stain 1 Weak Area (μm²)	71335.4		Stain 1 Weak Area (μm²)	26327.2		Stain 1 Weak Area (μm²)	64313.9		Stain 1 Weak Area (μm²)	70077.4		Stain 1 Weak Area (μm²)	99991.5		Stain 1 Weak Area (μm²)	40979.1
		Stain 1 Moderate Area (μm²)	40400.6		Stain 1 Moderate Area (μm²)	12273.3		Stain 1 Moderate Area (μm²)	50917.1		Stain 1 Moderate Area (μm²)	22849.9		Stain 1 Moderate Area (μm²)	46151.9		Stain 1 Moderate Area (μm²)	55252.8		Stain 1 Moderate Area (μm²)	80165.5		Stain 1 Moderate Area (μm²)	40271.8
		Stain 1 Strong Area (μm²)	127865		Stain 1 Strong Area (μm²)	37711.4		Stain 1 Strong Area (μm²)	151816		Stain 1 Strong Area (μm²)	71816.9		Stain 1 Strong Area (μm²)	157188		Stain 1 Strong Area (μm²)	194147		Stain 1 Strong Area (μm²)	209388		Stain 1 Strong Area (μm²)	164485
		Stain 2 Area (μm²)	81970.8		Stain 2 Area (μm²)	69487.9		Stain 2 Area (μm²)	18446.1		Stain 2 Area (μm²)	39255.8		Stain 2 Area (μm²)	70161.7		Stain 2 Area (μm²)	56517.2		Stain 2 Area (μm²)	96873.9		Stain 2 Area (μm²)	78049.7
		Stain 2 Weak Area (μm²)	27844.4		Stain 2 Weak Area (μm²)	16709.5		Stain 2 Weak Area (μm²)	9554.14		Stain 2 Weak Area (μm²)	13779		Stain 2 Weak Area (μm²)	24083.1		Stain 2 Weak Area (μm²)	24009.2		Stain 2 Weak Area (μm²)	32630.4		Stain 2 Weak Area (μm²)	21372
		Stain 2 Moderate Area (μm²)	18263.1		Stain 2 Moderate Area (μm²)	13872		Stain 2 Moderate Area (μm²)	4156.16		Stain 2 Moderate Area (μm²)	9118.84		Stain 2 Moderate Area (μm²)	15547.3		Stain 2 Moderate Area (μm²)	13329.8		Stain 2 Moderate Area (μm²)	21692.4		Stain 2 Moderate Area (μm²)	15756.3
		Stain 2 Strong Area (μm²)	35863.4		Stain 2 Strong Area (μm²)	38906.5		Stain 2 Strong Area (μm²)	4735.79		Stain 2 Strong Area (μm²)	16357.9		Stain 2 Strong Area (μm²)	30531.2		Stain 2 Strong Area (μm²)	19178.1		Stain 2 Strong Area (μm²)	42551.1		Stain 2 Strong Area (μm²)	40921.3
		% Stain 1 Positive Tissue	46.3296		% Stain 1 Positive Tissue	31.7771		% Stain 1 Positive Tissue	58.9151		% Stain 1 Positive Tissue	67.4241		% Stain 1 Positive Tissue	58.5657		% Stain 1 Positive Tissue	66.6578		% Stain 1 Positive Tissue	64.7015		% Stain 1 Positive Tissue	71.3528
		% Stain 1 Positive Tissue (weak)	12.5597		% Stain 1 Positive Tissue (weak)	8.22903		% Stain 1 Positive Tissue (weak)	15.3346		% Stain 1 Positive Tissue (weak)	14.6709		% Stain 1 Positive Tissue (weak)	14.0726		% Stain 1 Positive Tissue (weak)	14.6214		% Stain 1 Positive Tissue (weak)	16.6081		% Stain 1 Positive Tissue (weak)	11.8988
		% Stain 1 Positive Tissue (moderate)	8.10815		% Stain 1 Positive Tissue (moderate)	5.78202		% Stain 1 Positive Tissue (moderate)	10.9454		% Stain 1 Positive Tissue (moderate)	12.7332		% Stain 1 Positive Tissue (moderate)	10.0986		% Stain 1 Positive Tissue (moderate)	11.5283		% Stain 1 Positive Tissue (moderate)	13.3151		% Stain 1 Positive Tissue (moderate)	11.6935
		% Stain 1 Positive Tissue (strong)	25.6618		% Stain 1 Positive Tissue (strong)	17.766		% Stain 1 Positive Tissue (strong)	32.6351		% Stain 1 Positive Tissue (strong)	40.0201		% Stain 1 Positive Tissue (strong)	34.3945		% Stain 1 Positive Tissue (strong)	40.5081		% Stain 1 Positive Tissue (strong)	34.7783		% Stain 1 Positive Tissue (strong)	47.7605
		% Stain 2 Positive Tissue	16.451		% Stain 2 Positive Tissue	32.7361		% Stain 2 Positive Tissue	3.96527		% Stain 2 Positive Tissue	21.8753		% Stain 2 Positive Tissue	15.3522		% Stain 2 Positive Tissue	11.7921		% Stain 2 Positive Tissue	16.0903		% Stain 2 Positive Tissue	22.6628		17.6156
		% Stain 2 Positive Tissue (weak)	5.58819		% Stain 2 Positive Tissue (weak)	7.87192		% Stain 2 Positive Tissue (weak)	2.05381		% Stain 2 Positive Tissue (weak)	7.67837		% Stain 2 Positive Tissue (weak)	5.26966		% Stain 2 Positive Tissue (weak)	5.00943		% Stain 2 Positive Tissue (weak)	5.41974		% Stain 2 Positive Tissue (weak)	6.20565
		% Stain 2 Positive Tissue (moderate)	3.66529		% Stain 2 Positive Tissue (moderate)	6.53514		% Stain 2 Positive Tissue (moderate)	0.89343		% Stain 2 Positive Tissue (moderate)	5.08149		% Stain 2 Positive Tissue (moderate)	3.40194		% Stain 2 Positive Tissue (moderate)	2.78122		% Stain 2 Positive Tissue (moderate)	3.603		% Stain 2 Positive Tissue (moderate)	4.57507
		% Stain 2 Positive Tissue (strong)	7.19756		% Stain 2 Positive Tissue (strong)	18.329		% Stain 2 Positive Tissue (strong)	1.01803		% Stain 2 Positive Tissue (strong)	9.11548		% Stain 2 Positive Tissue (strong)	6.68059		% Stain 2 Positive Tissue (strong)	4.00145		% Stain 2 Positive Tissue (strong)	7.06753		% Stain 2 Positive Tissue (strong)	11.8821
		Stain 1 Average Positive Optical Density	0.496493		Stain 1 Average Positive Optical Density	0.484629		Stain 1 Average Positive Optical Density	0.489519		Stain 1 Average Positive Optical Density	0.512296		Stain 1 Average Positive Optical Density	0.501875		Stain 1 Average Positive Optical Density	0.498612		Stain 1 Average Positive Optical Density	0.492839		Stain 1 Average Positive Optical Density	0.539238
		Stain 2 Average Positive Optical Density	0.388301		Stain 2 Average Positive Optical Density	0.450543		Stain 2 Average Positive Optical Density	0.3058		Stain 2 Average Positive Optical Density	0.365816		Stain 2 Average Positive Optical Density	0.387944		Stain 2 Average Positive Optical Density	0.340841		Stain 2 Average Positive Optical Density	0.391762		Stain 2 Average Positive Optical Density	0.426487
		% Negative Tissue	43.0266		% Negative Tissue	40.6828		% Negative Tissue	38.9926		% Negative Tissue	21.4243		% Negative Tissue	31.9765		% Negative Tissue	27.1769		% Negative Tissue	26.3894		% Negative Tissue	15.9705
		BSNA90.2e	HOM
		Name	Value		Name	Value		Name	Value		Name	Value		Name	Value		Name	Value		Name	Value		Name	Value
		Tissue Area Analyzed (μm²)	679223		Tissue Area Analyzed (μm²)	431636		Tissue Area Analyzed (μm²)	462363		Tissue Area Analyzed (μm²)	746216		Tissue Area Analyzed (μm²)	560505		Tissue Area Analyzed (μm²)	448512		Tissue Area Analyzed (μm²)	620413		Tissue Area Analyzed (μm²)	720735
		Stain 1 Area (μm²)	203460		Stain 1 Area (μm²)	79161.6		Stain 1 Area (μm²)	104313		Stain 1 Area (μm²)	212697		Stain 1 Area (μm²)	125425		Stain 1 Area (μm²)	128353		Stain 1 Area (μm²)	152776		Stain 1 Area (μm²)	140946
		Stain 1 Weak Area (μm²)	66499.1		Stain 1 Weak Area (μm²)	26080.1		Stain 1 Weak Area (μm²)	32619.4		Stain 1 Weak Area (μm²)	66222		Stain 1 Weak Area (μm²)	37944.1		Stain 1 Weak Area (μm²)	42686.2		Stain 1 Weak Area (μm²)	47585.4		Stain 1 Weak Area (μm²)	43706.4
		Stain 1 Moderate Area (μm²)	39809.4		Stain 1 Moderate Area (μm²)	17518.9		Stain 1 Moderate Area (μm²)	22714.8		Stain 1 Moderate Area (μm²)	43744.5		Stain 1 Moderate Area (μm²)	25091.1		Stain 1 Moderate Area (μm²)	29888.7		Stain 1 Moderate Area (μm²)	32733.1		Stain 1 Moderate Area (μm²)	29143.9
		Stain 1 Strong Area (μm²)	97151		Stain 1 Strong Area (μm²)	35562.6		Stain 1 Strong Area (μm²)	48978.5		Stain 1 Strong Area (μm²)	102730		Stain 1 Strong Area (μm²)	62390.3		Stain 1 Strong Area (μm²)	55778.2		Stain 1 Strong Area (μm²)	72457.1		Stain 1 Strong Area (μm²)	68095.4
		Stain 2 Area (μm²)	119958		Stain 2 Area (μm²)	201055		Stain 2 Area (μm²)	123310		Stain 2 Area (μm²)	177553		Stain 2 Area (μm²)	151982		Stain 2 Area (μm²)	8979.13		Stain 2 Area (μm²)	140612		Stain 2 Area (μm²)	113066
		Stain 2 Weak Area (μm²)	42189.1		Stain 2 Weak Area (μm²)	21989.7		Stain 2 Weak Area (μm²)	26022.3		Stain 2 Weak Area (μm²)	52766.9		Stain 2 Weak Area (μm²)	31027.7		Stain 2 Weak Area (μm²)	5366.81		Stain 2 Weak Area (μm²)	58456.4		Stain 2 Weak Area (μm²)	52723
		Stain 2 Moderate Area (μm²)	27943.7		Stain 2 Moderate Area (μm²)	20461		Stain 2 Moderate Area (μm²)	20534.9		Stain 2 Moderate Area (μm²)	36083.4		Stain 2 Moderate Area (μm²)	26270		Stain 2 Moderate Area (μm²)	1673.66		Stain 2 Moderate Area (μm²)	35313.8		Stain 2 Moderate Area (μm²)	27298.2
		Stain 2 Strong Area (μm²)	49825.4		Stain 2 Strong Area (μm²)	158604		Stain 2 Strong Area (μm²)	76753		Stain 2 Strong Area (μm²)	88702.4		Stain 2 Strong Area (μm²)	94684.7		Stain 2 Strong Area (μm²)	1938.66		Stain 2 Strong Area (μm²)	46841.8		Stain 2 Strong Area (μm²)	33044.9
		% Stain 1 Positive Tissue	29.9547		% Stain 1 Positive Tissue	18.3399		% Stain 1 Positive Tissue	22.5608		% Stain 1 Positive Tissue	28.5034		% Stain 1 Positive Tissue	22.3772		% Stain 1 Positive Tissue	28.6175		% Stain 1 Positive Tissue	24.6248		% Stain 1 Positive Tissue	19.5558
		% Stain 1 Positive Tissue (weak)	9.79046		% Stain 1 Positive Tissue (weak)	6.04214		% Stain 1 Positive Tissue (weak)	7.05494		% Stain 1 Positive Tissue (weak)	8.87438		% Stain 1 Positive Tissue (weak)	6.76963		% Stain 1 Positive Tissue (weak)	9.51729		% Stain 1 Positive Tissue (weak)	7.66996		% Stain 1 Positive Tissue (weak)	6.06414
		% Stain 1 Positive Tissue (moderate)	5.86102		% Stain 1 Positive Tissue (moderate)	4.05872		% Stain 1 Positive Tissue (moderate)	4.91277		% Stain 1 Positive Tissue (moderate)	5.86217		% Stain 1 Positive Tissue (moderate)	4.47652		% Stain 1 Positive Tissue (moderate)	6.66395		% Stain 1 Positive Tissue (moderate)	5.27603		% Stain 1 Positive Tissue (moderate)	4.04364
		% Stain 1 Positive Tissue (strong)	14.3032		% Stain 1 Positive Tissue (strong)	8.23903		% Stain 1 Positive Tissue (strong)	10.5931		% Stain 1 Positive Tissue (strong)	13.7668		% Stain 1 Positive Tissue (strong)	11.1311		% Stain 1 Positive Tissue (strong)	12.4363		% Stain 1 Positive Tissue (strong)	11.6789		% Stain 1 Positive Tissue (strong)	9.44806
		% Stain 2 Positive Tissue	17.6611		% Stain 2 Positive Tissue	46.5797		% Stain 2 Positive Tissue	26.6696		% Stain 2 Positive Tissue	23.7938		% Stain 2 Positive Tissue	27.1153		% Stain 2 Positive Tissue	2.00198		% Stain 2 Positive Tissue	22.6643		% Stain 2 Positive Tissue	15.6876		22.7717
		% Stain 2 Positive Tissue (weak)	6.21138		% Stain 2 Positive Tissue (weak)	5.0945		% Stain 2 Positive Tissue (weak)	5.62812		% Stain 2 Positive Tissue (weak)	7.07127		% Stain 2 Positive Tissue (weak)	5.53568		% Stain 2 Positive Tissue (weak)	1.19658		% Stain 2 Positive Tissue (weak)	9.42219		% Stain 2 Positive Tissue (weak)	7.31517
		% Stain 2 Positive Tissue (moderate)	4.11406		% Stain 2 Positive Tissue (moderate)	4.74033		% Stain 2 Positive Tissue (moderate)	4.44128		% Stain 2 Positive Tissue (moderate)	4.83551		% Stain 2 Positive Tissue (moderate)	4.68685		% Stain 2 Positive Tissue (moderate)	0.373159		% Stain 2 Positive Tissue (moderate)	5.69198		% Stain 2 Positive Tissue (moderate)	3.78755
		% Stain 2 Positive Tissue (strong)	7.33564		% Stain 2 Positive Tissue (strong)	36.7449		% Stain 2 Positive Tissue (strong)	16.6002		% Stain 2 Positive Tissue (strong)	11.887		% Stain 2 Positive Tissue (strong)	16.8928		% Stain 2 Positive Tissue (strong)	0.432241		% Stain 2 Positive Tissue (strong)	7.55011		% Stain 2 Positive Tissue (strong)	4.58489
		Stain 1 Average Positive Optical Density	0.400449		Stain 1 Average Positive Optical Density	0.396247		Stain 1 Average Positive Optical Density	0.391719		Stain 1 Average Positive Optical Density	0.410217		Stain 1 Average Positive Optical Density	0.421844		Stain 1 Average Positive Optical Density	0.368781		Stain 1 Average Positive Optical Density	0.400693		Stain 1 Average Positive Optical Density	0.411274
		Stain 2 Average Positive Optical Density	0.364687		Stain 2 Average Positive Optical Density	0.582857		Stain 2 Average Positive Optical Density	0.476528		Stain 2 Average Positive Optical Density	0.413098		Stain 2 Average Positive Optical Density	0.482333		Stain 2 Average Positive Optical Density	0.276454		Stain 2 Average Positive Optical Density	0.327022		Stain 2 Average Positive Optical Density	0.3152
		% Negative Tissue	55.5433		% Negative Tissue	38.8452		% Negative Tissue	54.1984		% Negative Tissue	52.5817		% Negative Tissue	54.5798		% Negative Tissue	69.9646		% Negative Tissue	56.6471		% Negative Tissue	67.8316
		BSNA69.3a	HOM
		Name	Value		Name	Value		Name	Value		Name	Value		Name	Value		Name	Value		Name	Value		Name	Value
		Tissue Area Analyzed (μm²)	477540		Tissue Area Analyzed (μm²)	500894		Tissue Area Analyzed (μm²)	538632		Tissue Area Analyzed (μm²)	456143		Tissue Area Analyzed (μm²)	454661		Tissue Area Analyzed (μm²)	658895		Tissue Area Analyzed (μm²)	571633		Tissue Area Analyzed (μm²)	584343
		Stain 1 Area (μm²)	176696		Stain 1 Area (μm²)	214914		Stain 1 Area (μm²)	231362		Stain 1 Area (μm²)	194450		Stain 1 Area (μm²)	221802		Stain 1 Area (μm²)	306409		Stain 1 Area (μm²)	298847		Stain 1 Area (μm²)	257179
		Stain 1 Weak Area (μm²)	39873.5		Stain 1 Weak Area (μm²)	51294.1		Stain 1 Weak Area (μm²)	53772		Stain 1 Weak Area (μm²)	42025.2		Stain 1 Weak Area (μm²)	54160		Stain 1 Weak Area (μm²)	76034.2		Stain 1 Weak Area (μm²)	70394.9		Stain 1 Weak Area (μm²)	57042.5
		Stain 1 Moderate Area (μm²)	29473.6		Stain 1 Moderate Area (μm²)	37534.8		Stain 1 Moderate Area (μm²)	38482.7		Stain 1 Moderate Area (μm²)	29967.8		Stain 1 Moderate Area (μm²)	39795.6		Stain 1 Moderate Area (μm²)	52046.4		Stain 1 Moderate Area (μm²)	50439.7		Stain 1 Moderate Area (μm²)	42062.7
		Stain 1 Strong Area (μm²)	107349		Stain 1 Strong Area (μm²)	126085		Stain 1 Strong Area (μm²)	139107		Stain 1 Strong Area (μm²)	122457		Stain 1 Strong Area (μm²)	127846		Stain 1 Strong Area (μm²)	178328		Stain 1 Strong Area (μm²)	178012		Stain 1 Strong Area (μm²)	158074
		Stain 2 Area (μm²)	83127.2		Stain 2 Area (μm²)	95971.5		Stain 2 Area (μm²)	90138.8		Stain 2 Area (μm²)	74089.2		Stain 2 Area (μm²)	73052.9		Stain 2 Area (μm²)	102266		Stain 2 Area (μm²)	125661		Stain 2 Area (μm²)	75596.6
		Stain 2 Weak Area (μm²)	30308.4		Stain 2 Weak Area (μm²)	35964.4		Stain 2 Weak Area (μm²)	28491.5		Stain 2 Weak Area (μm²)	21958.5		Stain 2 Weak Area (μm²)	24796.1		Stain 2 Weak Area (μm²)	37923.3		Stain 2 Weak Area (μm²)	33455.4		Stain 2 Weak Area (μm²)	28807.9
		Stain 2 Moderate Area (μm²)	18140.7		Stain 2 Moderate Area (μm²)	23261.6		Stain 2 Moderate Area (μm²)	19764.1		Stain 2 Moderate Area (μm²)	14854		Stain 2 Moderate Area (μm²)	15586		Stain 2 Moderate Area (μm²)	22413.5		Stain 2 Moderate Area (μm²)	24357.3		Stain 2 Moderate Area (μm²)	16136.2
		Stain 2 Strong Area (μm²)	34678.2		Stain 2 Strong Area (μm²)	36745.6		Stain 2 Strong Area (μm²)	41883.2		Stain 2 Strong Area (μm²)	37276.7		Stain 2 Strong Area (μm²)	32670.8		Stain 2 Strong Area (μm²)	41929.3		Stain 2 Strong Area (μm²)	67848.3		Stain 2 Strong Area (μm²)	30652.5
		% Stain 1 Positive Tissue	37.0013		% Stain 1 Positive Tissue	42.906		% Stain 1 Positive Tissue	42.9536		% Stain 1 Positive Tissue	42.6291		% Stain 1 Positive Tissue	48.784		% Stain 1 Positive Tissue	46.5034		% Stain 1 Positive Tissue	52.2795		% Stain 1 Positive Tissue	44.0117
		% Stain 1 Positive Tissue (weak)	8.34977		% Stain 1 Positive Tissue (weak)	10.2405		% Stain 1 Positive Tissue (weak)	9.98308		% Stain 1 Positive Tissue (weak)	9.21316		% Stain 1 Positive Tissue (weak)	11.9122		% Stain 1 Positive Tissue (weak)	11.5397		% Stain 1 Positive Tissue (weak)	12.3147		% Stain 1 Positive Tissue (weak)	9.76183
		% Stain 1 Positive Tissue (moderate)	6.17196		% Stain 1 Positive Tissue (moderate)	7.49356		% Stain 1 Positive Tissue (moderate)	7.14453		% Stain 1 Positive Tissue (moderate)	6.56982		% Stain 1 Positive Tissue (moderate)	8.7528		% Stain 1 Positive Tissue (moderate)	7.89904		% Stain 1 Positive Tissue (moderate)	8.82379		% Stain 1 Positive Tissue (moderate)	7.19829
		% Stain 1 Positive Tissue (strong)	22.4796		% Stain 1 Positive Tissue (strong)	25.172		% Stain 1 Positive Tissue (strong)	25.826		% Stain 1 Positive Tissue (strong)	26.8462		% Stain 1 Positive Tissue (strong)	28.119		% Stain 1 Positive Tissue (strong)	27.0647		% Stain 1 Positive Tissue (strong)	31.141		% Stain 1 Positive Tissue (strong)	27.0515
		% Stain 2 Positive Tissue	17.4074		% Stain 2 Positive Tissue	19.1601		% Stain 2 Positive Tissue	16.7348		% Stain 2 Positive Tissue	16.2425		% Stain 2 Positive Tissue	16.0676		% Stain 2 Positive Tissue	15.5209		% Stain 2 Positive Tissue	21.9828		% Stain 2 Positive Tissue	12.937		17.0066
		% Stain 2 Positive Tissue (weak)	6.34678		% Stain 2 Positive Tissue (weak)	7.18005		% Stain 2 Positive Tissue (weak)	5.28962		% Stain 2 Positive Tissue (weak)	4.81396		% Stain 2 Positive Tissue (weak)	5.45375		% Stain 2 Positive Tissue (weak)	5.75559		% Stain 2 Positive Tissue (weak)	5.85259		% Stain 2 Positive Tissue (weak)	4.92997
		% Stain 2 Positive Tissue (moderate)	3.79878		% Stain 2 Positive Tissue (moderate)	4.64401		% Stain 2 Positive Tissue (moderate)	3.66932		% Stain 2 Positive Tissue (moderate)	3.25643		% Stain 2 Positive Tissue (moderate)	3.42806		% Stain 2 Positive Tissue (moderate)	3.40168		% Stain 2 Positive Tissue (moderate)	4.261		% Stain 2 Positive Tissue (moderate)	2.76143
		% Stain 2 Positive Tissue (strong)	7.26184		% Stain 2 Positive Tissue (strong)	7.336		% Stain 2 Positive Tissue (strong)	7.77585		% Stain 2 Positive Tissue (strong)	8.17215		% Stain 2 Positive Tissue (strong)	7.18575		% Stain 2 Positive Tissue (strong)	6.36359		% Stain 2 Positive Tissue (strong)	11.8692		% Stain 2 Positive Tissue (strong)	5.24563
		Stain 1 Average Positive Optical Density	0.508704		Stain 1 Average Positive Optical Density	0.487769		Stain 1 Average Positive Optical Density	0.509468		Stain 1 Average Positive Optical Density	0.543853		Stain 1 Average Positive Optical Density	0.505277		Stain 1 Average Positive Optical Density	0.512677		Stain 1 Average Positive Optical Density	0.517828		Stain 1 Average Positive Optical Density	0.540616
		Stain 2 Average Positive Optical Density	0.369886		Stain 2 Average Positive Optical Density	0.346682		Stain 2 Average Positive Optical Density	0.395457		Stain 2 Average Positive Optical Density	0.41692		Stain 2 Average Positive Optical Density	0.38745		Stain 2 Average Positive Optical Density	0.371608		Stain 2 Average Positive Optical Density	0.443176		Stain 2 Average Positive Optical Density	0.377931
		% Negative Tissue	51.5382		% Negative Tissue	45.4311		% Negative Tissue	46.2747		% Negative Tissue	48.547		% Negative Tissue	40.9599		% Negative Tissue	44.152		% Negative Tissue	34.4501		% Negative Tissue	48.0067
