# Supplementary material for: CYRI-B-mediated macropinocytosis drives metastasis via lysophosphatidic acid receptor uptake
Source: eLife. 2024 May 7;13:e83712. doi: 10.7554/eLife.83712 (PMC11219039; doi:10.7554/eLife.83712)
Supplement: Supplementary file 1. — Table outlining data on mouse cohorts used in the experiments. [file elife-83712-supp1.xlsx]

## Sheet: Sheet1
Table 1: Mouse cohort data
Survival curve
Mouse ID	Sex	D.O.B	CRE	CYRI-B	Kras G12D	p53 R172H	Cohort	age, days	D.O.D	Status
BSNA1.2a	Male	2018-07-19	pos	wt	het	het	Survival	126	2018-11-19
BSNA7.1c	Female	2018-08-15	Pos	wt	het	het	Survival	424	2019-10-19	censored
BSNA7.1e	Female	2018-08-19	Pos	wt	het	het	Survival	95	2018-11-23	censored
BSNA5.1e	Female	2018-08-19	Pos	wt	het	het	Survival	91	2018-11-19	censored
BSNA7.2b	Male	2018-09-11	Pos	wt	het	het	Survival	72	2018-11-23	censored
BSNA7.2d	Female	2018-09-11	Pos	wt	het	het	Survival	170	2019-02-26
BSNA7.2g	Female	2018-09-11	Pos	wt	het	het	Survival	130	2019-01-21
BSNA13.1e	Female	2018-09-13	Pos	wt	het	het	Survival	114	2019-01-07	censored
BSNA5.2c	Female	2018-09-12	Pos	wt	het	het	Survival	296	2019-07-08
BSNA14.1d	Female	2018-09-25	pos	wt	het	het	Survival	159	2019-03-06	censored
BSNA14.1g	Female	2018-09-25	pos	wt	het	het	Survival	167	2019-05-01
BSNA12.2b	Male	2018-10-11	Pos	wt	het	het	Survival	71	2018-12-22	censored
BSNA10.3c	Male	2018-10-28	Pos	wt	het	het	Survival	71	2019-01-09	censored
BSNA9.3c	Female	2018-10-29	Pos	wt	het	het	Survival	95	2019-02-04	censored
BSNA15.3a	Male	2018-11-13	Pos	wt	het	het	Survival	125	2019-03-18	censored
BSNA20.1d	Female	2018-12-27	Pos	wt	het	het	Survival	188	2019-07-05	censored
BSNA28.1d	Male	2019-01-28	Pos	wt	het	het	Survival	102	2019-05-10	censored
BSNA31.1b	Male	2019-02-27	Pos	wt	het	het	Survival	87	2019-05-24	censored
BSNA35.1a	Male	2019-04-04	Pos	wt	het	het	Survival	125	2019-08-09
BSNA35.1c	Male	2019-04-04	Pos	wt	het	het	Survival	205	2019-10-29
BSNA35.1g	Female	2019-04-04	Pos	wt	het	het	Survival	207	2019-11-01
BSNA36.1d	Female	2019-04-08	Pos	wt	het	het	Survival	212	2019-11-10
BSNA31.3c	Female	2019-04-15	Pos	wt	het	het	Survival	98	2019-07-22	censored
BSNA38.1d	Female	2019-04-10	Pos	wt	het	het	Survival	152	2019-09-12
BSNA41.1a	Male	2019-05-05	Pos	wt	het	het	Survival	207	2019-12-02
BSNA41.1d	Female	2019-05-05	Pos	wt	het	het	Survival	157	2019-10-12	censored
BSNA34.2c	Male	2019-05-10	pos	wt	het	het	Survival	180	2019-11-10
BSNA39.1c	Female	2019-05-16	pos	wt	het	het	Survival	86	2019-08-12
BSNA39.1f	Female	2019-05-16	pos	wt	het	het	Survival	120	2019-09-16
BSNA41.2d	Female	2019-05-28	pos	wt	het	het	Survival	117	2019-09-25
BSNA43.2d	Male	2019-05-30	Pos	wt	het	het	Survival	92	2019-09-02
BSNA32.5b	Male	2019-06-01	Pos	Wt	het	het	Survival	102	2019-09-13
BSNA43.3a	Male	2019-06-22	Pos	wt	het	het	Survival	167	2019-12-09
BSNA43.3c	Male	2019-06-22	Pos	wt	het	het	Survival	204	2020-01-16
BSNA41.3b	Male	2019-07-02	Pos	wt	het	het	Survival	64	2019-09-06	censored
BAJF91.1a	Male	2018-03-19	pos	wt	het	het	Survival	272	2018-12-21	censored
BAJF91.1d	Female	2018-03-19	pos	wt	het	het	Survival	133	2018-07-26
BAJF97.1a	Male	2018-06-10	pos	wt	het	het	Survival	146	2018-09-03	censored
BAJF97.1b	Male	2018-06-10	pos	wt	het	het	Survival	169	2018-09-26	censored
BAJF108.1a	Male	2019-05-02	pos	wt	het	het	Survival	139	2019-09-20	censored
BAJF108.1f	Female	2019-05-02	pos	wt	het	het	Survival	170	2019-10-21
BAJF104.1d	Male	2019-06-02	pos	wt	het	het	Survival	66	2019-08-08	censored
BAJF107.2b	Male	2019-06-14	pos	wt	het	het	Survival	67	2019-08-21
BSNA9.1d	Male	2018-08-17	Pos	hom	het	het	Survival	132	2019-01-04
BSNA8.1c	Male	2018-08-21	Pos	hom	het	het	Survival	220	2019-04-01	censored
BSNA8.1f	Female	2018-08-21	Pos	hom	het	het	Survival	118	2018-12-19
BSNA12.1a	Male	2018-09-16	Pos	hom	het	het	Survival	103	2018-12-30
BSNA13.1b	Female	2018-09-13	Pos	hom	het	het	Survival	99	2018-12-22
BSNA8.2c	Male	2018-09-26	pos	hom	het	het	Survival	117	2019-01-23
BSNA15.1a	Female	2018-09-27	Pos	hom	het	het	Survival	171	2019-03-18
BSNA11.1f	Female	2018-10-25	Pos	hom	het	het	Survival	179	2019-04-24
BSNA11.1g	Female	2018-10-25	Pos	hom	het	het	Survival	93	2019-01-28
BSNA9.4a	Male	2018-12-08	Pos	hom	het	het	Survival	70	2019-02-18
BSNA9.4d	Male	2018-12-08	Pos	hom	het	het	Survival	112	2019-03-30
BSNA19.1b	Male	2018-11-25	Pos	hom	het	het	Survival	195	2019-06-10
BSNA16.1a	Male	2018-11-24	Pos	hom	het	het	Survival	180	2019-05-24	censored
BSNA10.4d	Female	2018-12-17	Pos	hom	het	het	Survival	97	2019-03-24
BSNA24.1c	Male	2018-12-20	Pos	hom	het	het	Survival	55	2019-02-15	censored
BSNA24.1d	Male	2018-12-20	Pos	hom	het	het	Survival	173	2019-06-13
BSNA11.3a	Male	2018-12-22	Pos	hom	het	het	Survival	104	2019-04-06
BSNA33.1c	Male	2019-02-27	Pos	hom	het	het	Survival	124	2019-07-01	censored
BSNA31.2c	Female	2019-03-23	Pos	hom	het	het	Survival	105	2019-07-08
BSNA38.1c	Female	2019-04-10	Pos	hom	het	het	Survival	92	2019-07-12	censored
BSNA37.2b	Male	2019-04-28	Pos	hom	het	het	Survival	156	2019-10-04
BSNA34.2i	Female	2019-05-10	pos	hom	het	het	Survival	159	2019-10-19
BSNA49.2c	Female	2019-09-12	pos	hom	het	het	survival	98	2019-12-20
BSNA56.1g	Female	2019-11-04	pos	hom	het	het	survival	139	2020-03-23
BSNA58.1d	Male	2019-11-26	pos	hom	het	het	survival	100	2020-03-06
BSNA60.1b	Male	2019-12-31	pos	hom	het	het	survival	76	2020-03-16
BSNA64.1h	Female	2020-01-02	pos	hom	het	het	Survival	91	2020-04-03
BAJF91.1a	Male	2018-03-19	pos	wt	het	het	Survival	272	2018-12-21	censored
BAJF91.1d	Female	2018-03-19	pos	wt	het	het	Survival	133	2018-07-26
BAJF97.1a	Male	2018-06-10	pos	wt	het	het	Survival	146	2018-09-03	censored
BAJF97.1b	Male	2018-06-10	pos	wt	het	het	Survival	169	2018-09-26	censored
BAJF108.1a	Male	2019-05-02	pos	wt	het	het	Survival	139	2019-09-20	censored
BAJF108.1f	Female	2019-05-02	pos	wt	het	het	Survival	170	2019-10-21
BAJF104.1d	Male	2019-06-02	pos	wt	het	het	Survival	66	2019-08-08	censored
BAJF107.2b	Male	2019-06-14	pos	wt	het	het	Survival	67	2019-08-21
Mice have been censored for the following reasons : lung adenocarcinoma, found dead during routine husbandry, papilloma reaching end point or unrelated PDAC death
Early time points
Mouse ID	Sex	D.O.B	CRE	CYRI-B	Kras G12D	p53 R172H	Cohort	age, days	D.O.D	Status
BSNA47.1a	Male	2019-08-20	pos	wt	het	het	15 weeks	104	2019-12-04
BSNA54.1d	Female	2019-11-07	pos	wt	het	het	15 weeks	107	2020-02-24
BSNA53.2a	Male	2019-11-19	pos	wt	het	het	15 weeks	105	2020-03-04
BSNA71.1d	Female	2020-03-19	pos	wt	het	het	15 weeks	104	2020-07-03
BSNA80.1g	Female	2020-04-30	pos	wt	het	het	15 weeks	795	2020-08-14
BSNA84.3c	Female	2020-07-27	pos	wt	het	het	15 weeks	103	2020-11-10
BSNA87.2d	Male	2020-08-16	pos	wt	het	het	15 weeks	105	2020-12-01
BSNA77.1c	Female	2020-04-29	pos	wt	het	het	10 weeks	69	2020-07-08
BSNA77.2c	Male	2020-05-25	pos	wt	het	het	10 weeks	770	2020-08-05
BSNA84.1e	Male	2020-06-02	pos	wt	het	het	10 weeks	763	2020-08-10
BSNA81.1e	Male	2020-06-01	pos	wt	het	het	10 weeks	764	2020-08-10
BSNA88.1b	Female	2020-08-16	pos	wt	het	het	10 weeks	70	2020-10-26
BSNA88.1h	Female	2020-08-16	pos	wt	het	het	10 weeks	70	2020-10-26
BSNA66.1j	Female	2020-01-30	pos	wt	het	het	6 weeks	42	2020-03-12
BSNA87.1b	Male	2020-07-23	pos	wt	het	het	6 weeks	712	2020-09-03
BSNA87.1e	Male	2020-07-23	pos	wt	het	het	6 weeks	712	2020-09-03
BSNA87.1g	Male	2020-07-23	pos	wt	het	het	6 weeks	712	2020-09-03
BSNA87.1k	Female	2020-07-23	pos	wt	het	het	6 weeks	712	2020-09-03
BSNA67.1a	Male	2020-01-30	pos	hom	het	het	6 weeks	42	2020-03-12
BSNA66.1g	Female	2020-01-30	pos	hom	het	het	6 weeks	42	2020-03-12
BSNA66.1i	Female	2020-01-30	pos	hom	het	het	6 weeks	42	2020-03-12
BSNA84.3d	Female	2020-07-27	pos	hom	het	het	6 weeks	708	2020-09-07
BSNA84.3e	Female	2020-07-27	pos	hom	het	het	6 weeks	708	2020-09-07
BSNA63.3a	Female	2020-03-03	pos	hom	het	het	10 weeks	69	2020-05-12
BSNA68.2a	Male	2020-03-03	pos	hom	het	het	10 weeks	69	2020-05-12
BSNA69.3c	Female	2020-03-17	pos	hom	het	het	10 weeks	69	2020-05-26
BSNA80.1a	Male	2020-04-30	pos	hom	het	het	10 weeks	68	2020-07-08
BSNA89.1e	Female	2020-09-04	pos	hom	het	het	10 weeks	69	2020-11-13
BSNA64.1e	Male	2020-01-02	pos	hom	het	het	15 weeks	105	2020-04-17
BSNA64.1f	Female	2020-01-02	pos	hom	het	het	15 weeks	105	2020-04-17
BSNA60.2h	Female	2020-01-23	pos	hom	het	het	15 weeks	103	2020-05-06
BSNA70.2c	Male	2020-02-23	pos	hom	het	het	15 weeks	105	2020-06-08
BSNA69.3a	Male	2020-03-17	pos	hom	het	het	15 weeks	104	2020-07-01
BSNA80.1f	Female	2020-04-30	pos	hom	het	het	15 weeks	795	2020-08-14
BSNA90.2e	Male	2020-10-12	pos	hom	het	het	15 weeks	105	2021-01-26
RNAscope
Mouse ID	Sex	D.O.B	CRE	CYRI-B	Kras G12D	p53 R172H	Cohort	age, days	D.O.D	Status
BAJD34.1h	Male	2016-12-07	pos	wt	het	het	6 weeks	42	2017-01-19
BAJD92.2d	Female	2017-10-15	pos	wt	het	het	6 weeks	45	2017-11-30
BAJD97.1a	Male	2017-10-19	pos	wt	het	het	6 weeks	38	2017-11-27
BAJD91.1d	Female	2017-09-21	pos	wt	het	het	10 weeks	69	2017-11-30
BAJD91.1f	Female	2017-09-21	pos	wt	het	het	10 weeks	69	2017-11-30
BAJD92.1b	Male	2017-09-21	pos	wt	het	het	10 weeks	66	2017-11-27
BAJD91.2b	Female	2017-11-01	pos	wt	het	het	10 weeks	69	2018-01-10
BAJD82.2a	Male	2017-07-26	pos	wt	het	het	15 weeks	102	2017-11-08
BAJD90.1d	Male	2017-07-26	pos	wt	het	het	15 weeks	102	2017-11-08
BAJD93.1b	Male	2017-09-23	pos	wt	het	het	15 weeks	102	2018-01-05
BAJD93.1d	Female	2017-09-23	pos	wt	het	het	15 weeks	102	2018-01-05
BAJD91.2d	Female	2017-11-01	pos	wt	het	het	15 weeks	103	2018-02-14
BAJD81.2b	Male	2017-06-08	pos	wt	het	het	End point	75	2017-08-23
BAJD25.2a	Male	2016-09-13	pos	wt	het	het	End point	177	2017-03-10
BAJD35.1j	Female	2016-10-28	pos	wt	het	het	End point	180	2017-04-28
BAJD14.1a	Male	2016-09-12	pos	wt	het	het	End point	205	2017-04-07
Bedding	Datasand Eco-Pure Aspen Chips 4 Premium
Sizzle-Pet	LBS Biotechnology
Dome Home	LBS Biotechnology
Plastic tunnel tube	LBS Biotechnology
Enrichment	Datasand Aspen Bricks 500x100x100mm
Diet	Secial Diet Services CRME irradiated
Cages	Techniplast GM500
D.O.B. = Date of birth, D.O.D. = Date of death, pos = positive for allele, het = heterozygous, wt = wild type
