# Supplementary figures and images for: CYRI-B-mediated macropinocytosis drives metastasis via lysophosphatidic acid receptor uptake
Source: eLife journal article supplement (doi:10.7554/elife.83712), 2024-05-07

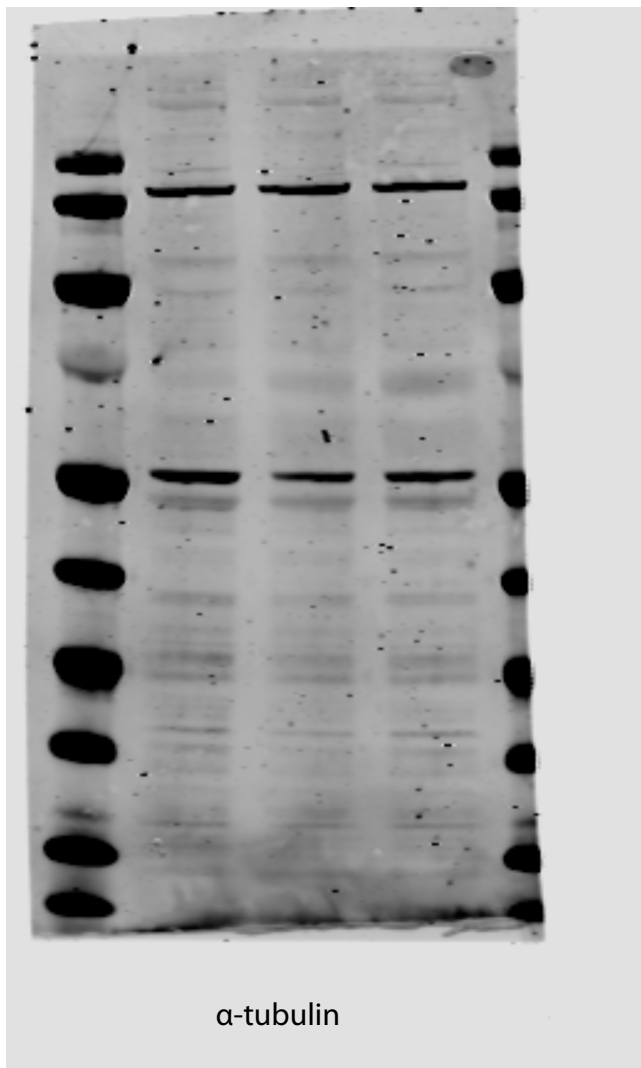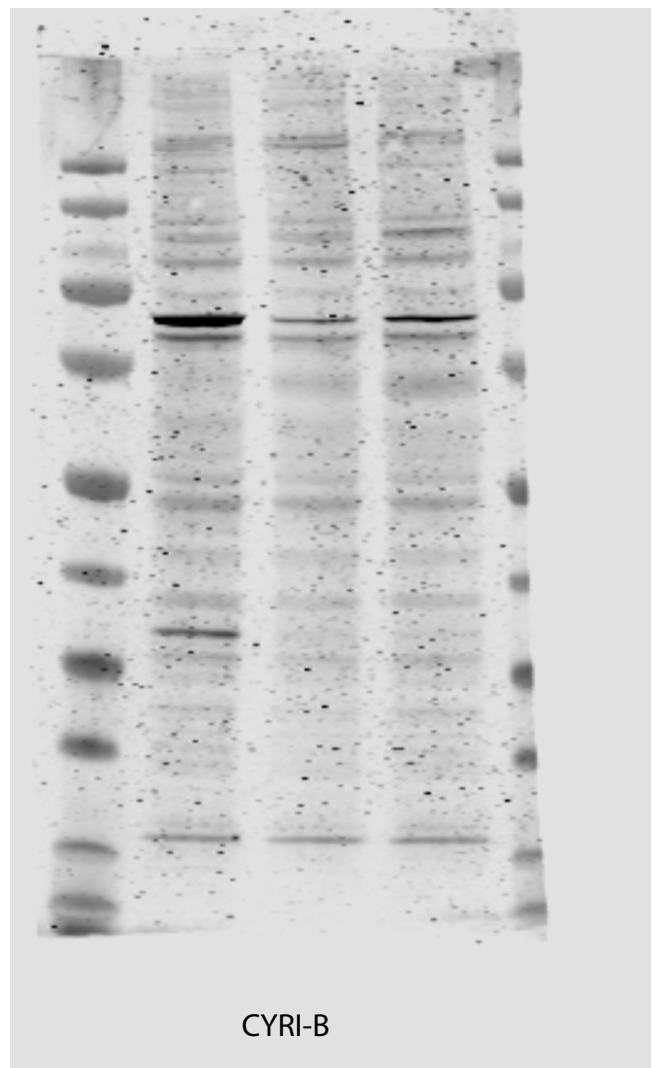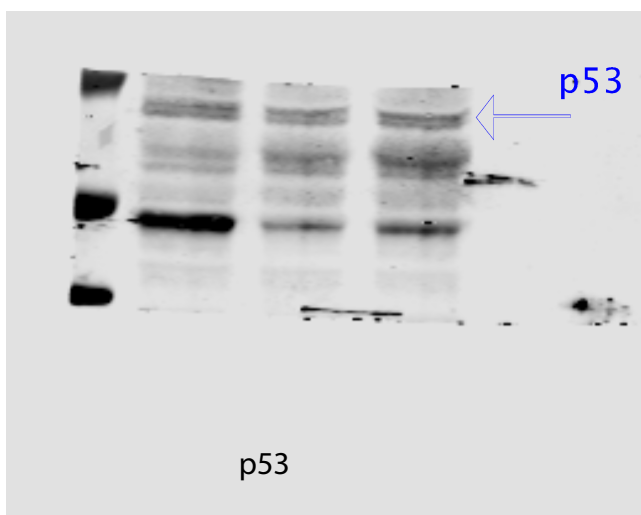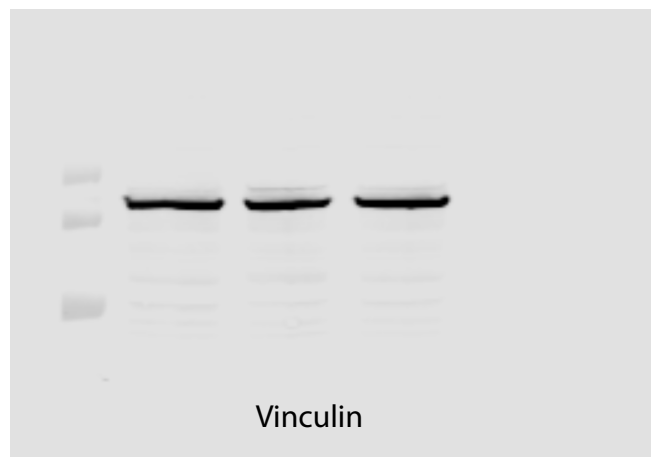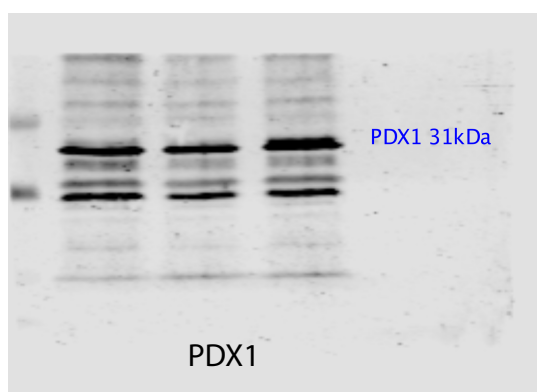

Supplement: fig2-data2 [file elife-83712-fig2-data2-v2.zip]

Figure 2D

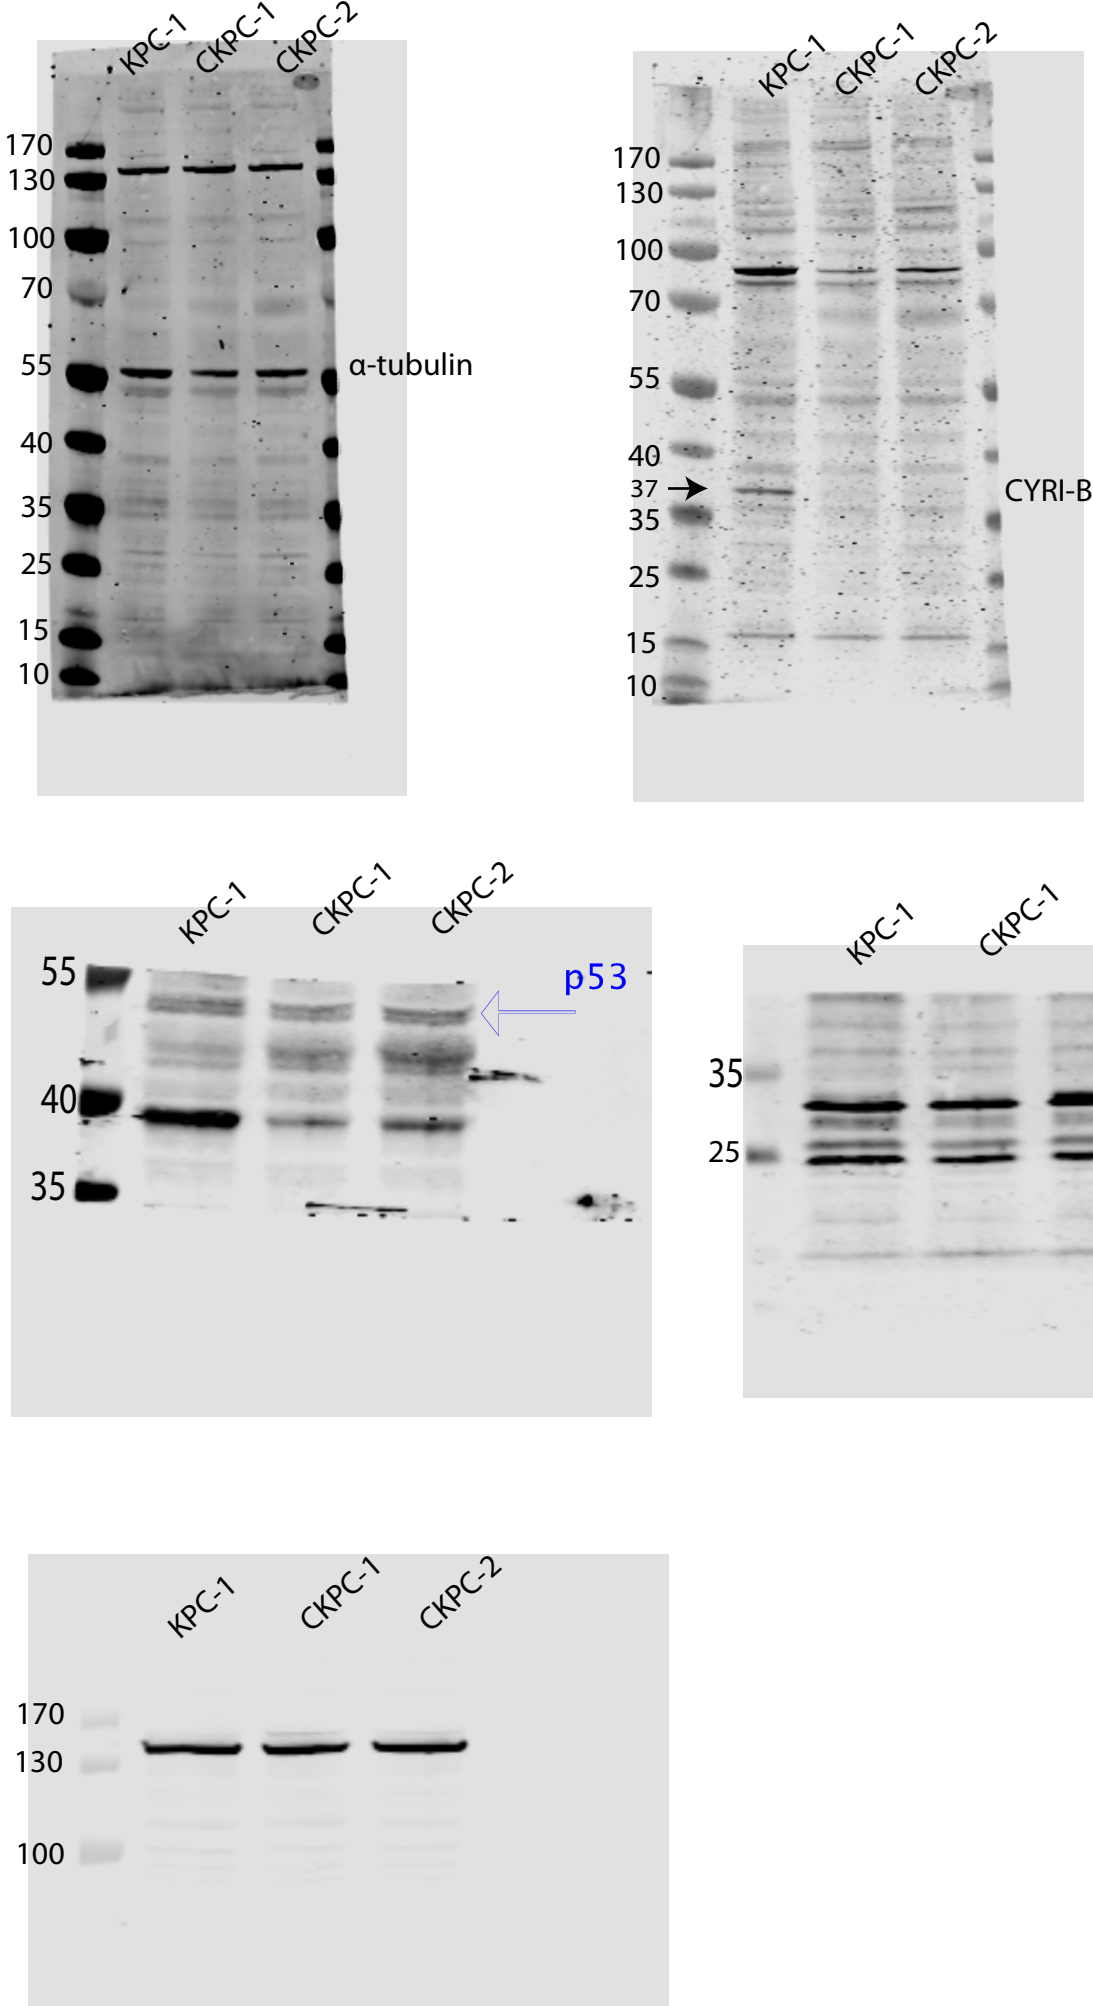

Supplement: fig2-data2 [file elife-83712-fig2-data2-v2.zip]

Figure 4- figure supplement 1A

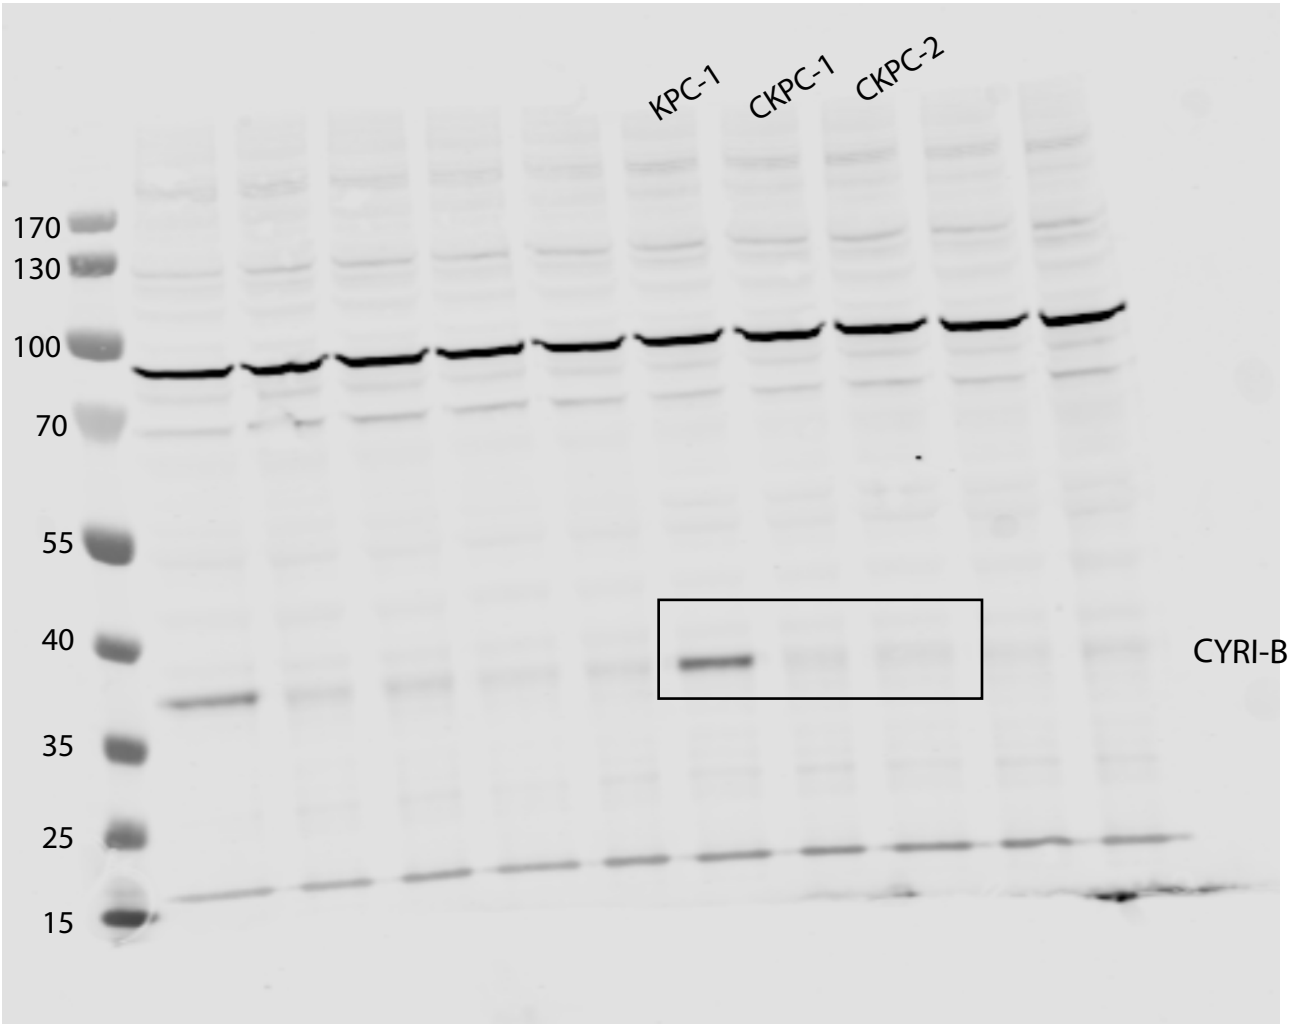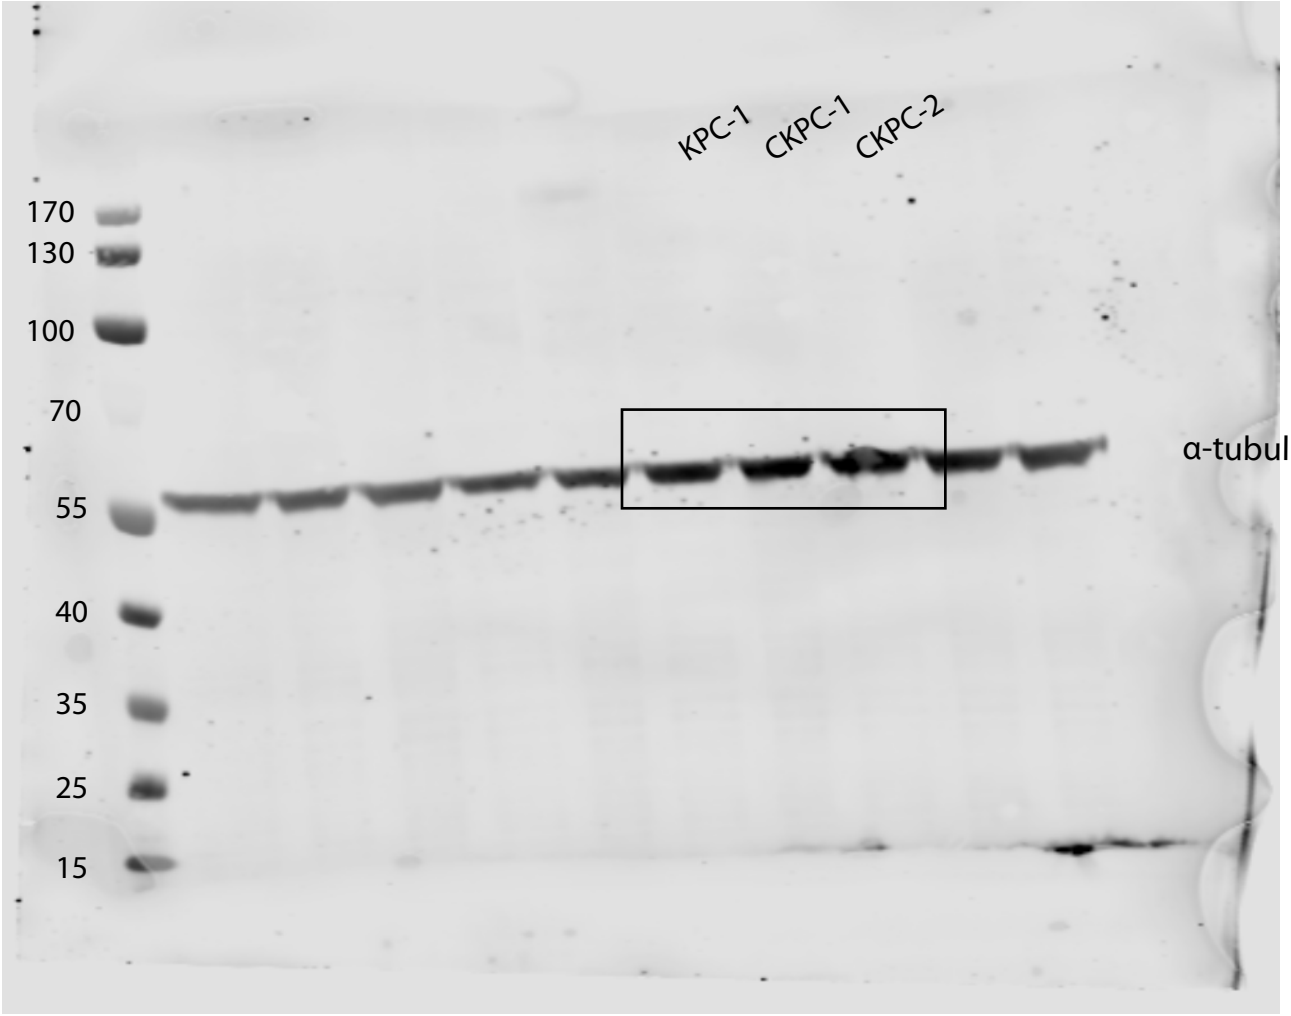

Supplement: fig4-figsupp1-data1 [file elife-83712-fig4-figsupp1-data1-v2.zip]

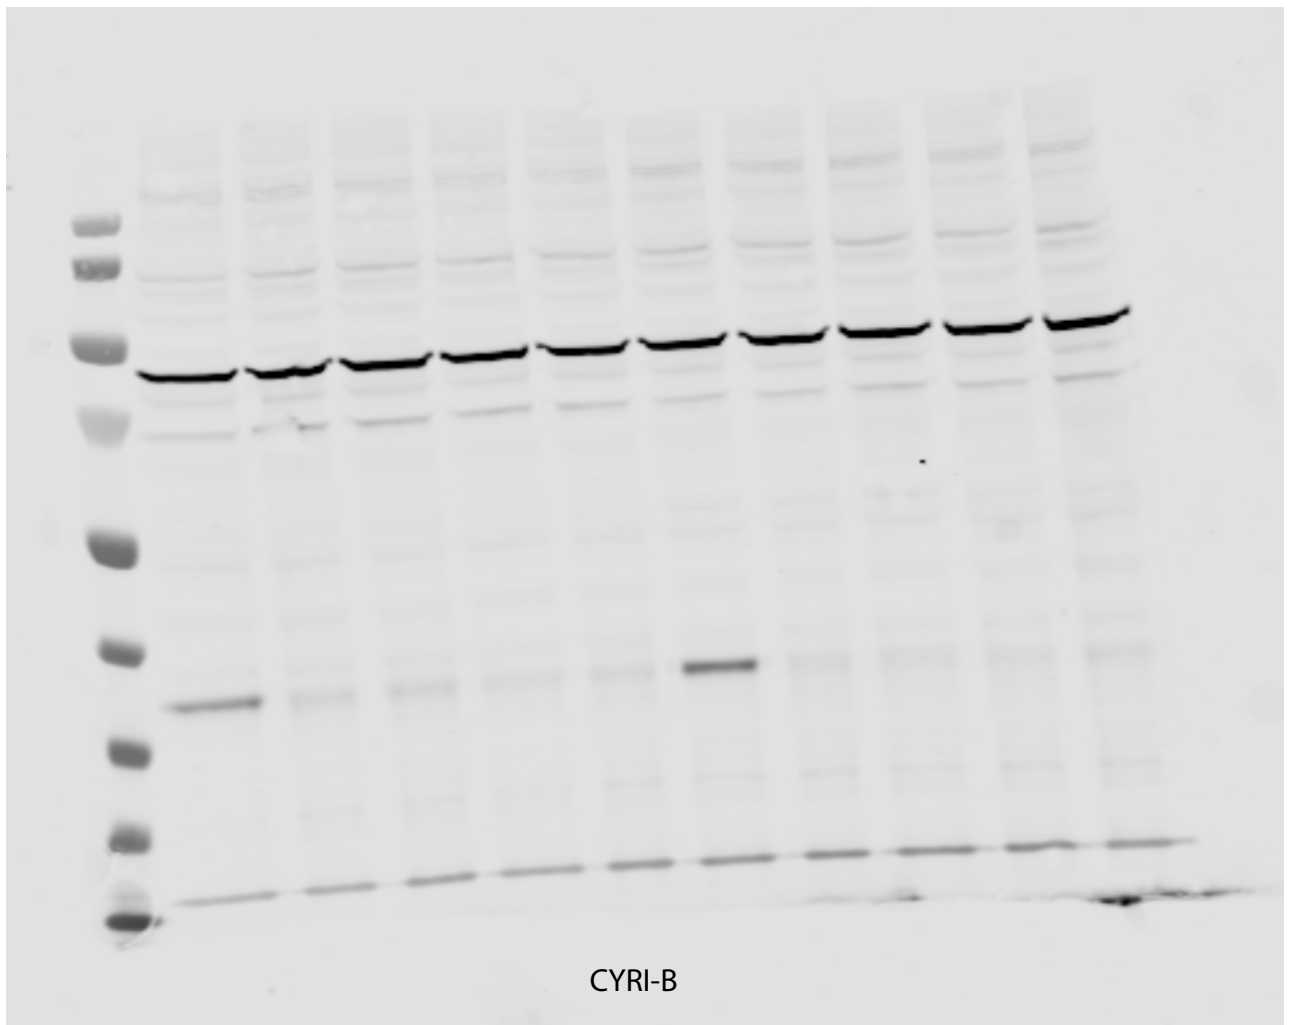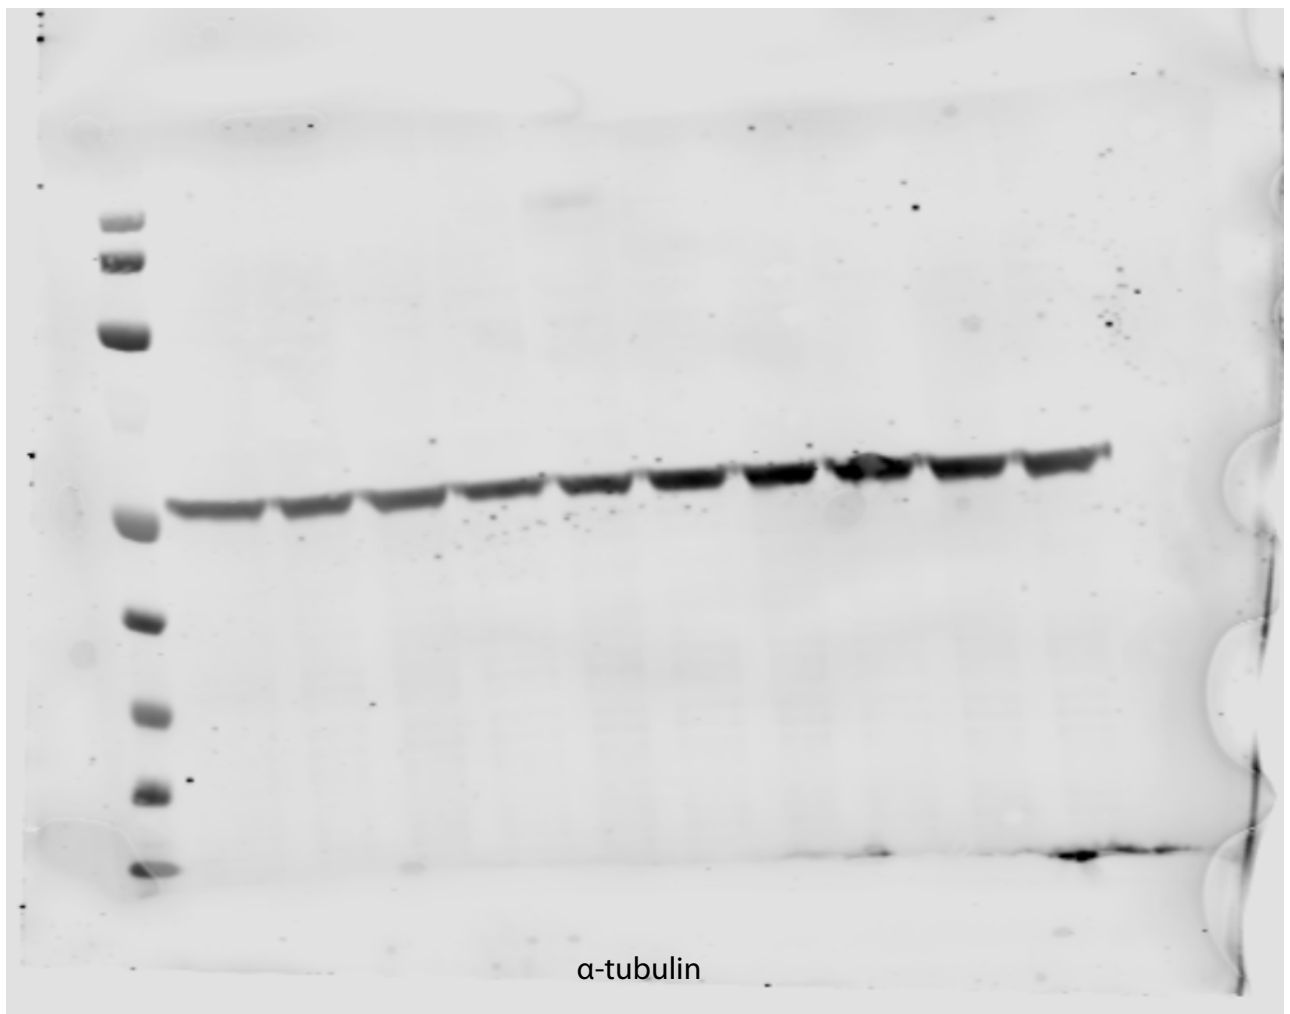

Supplement: fig4-figsupp1-data1 [file elife-83712-fig4-figsupp1-data1-v2.zip]

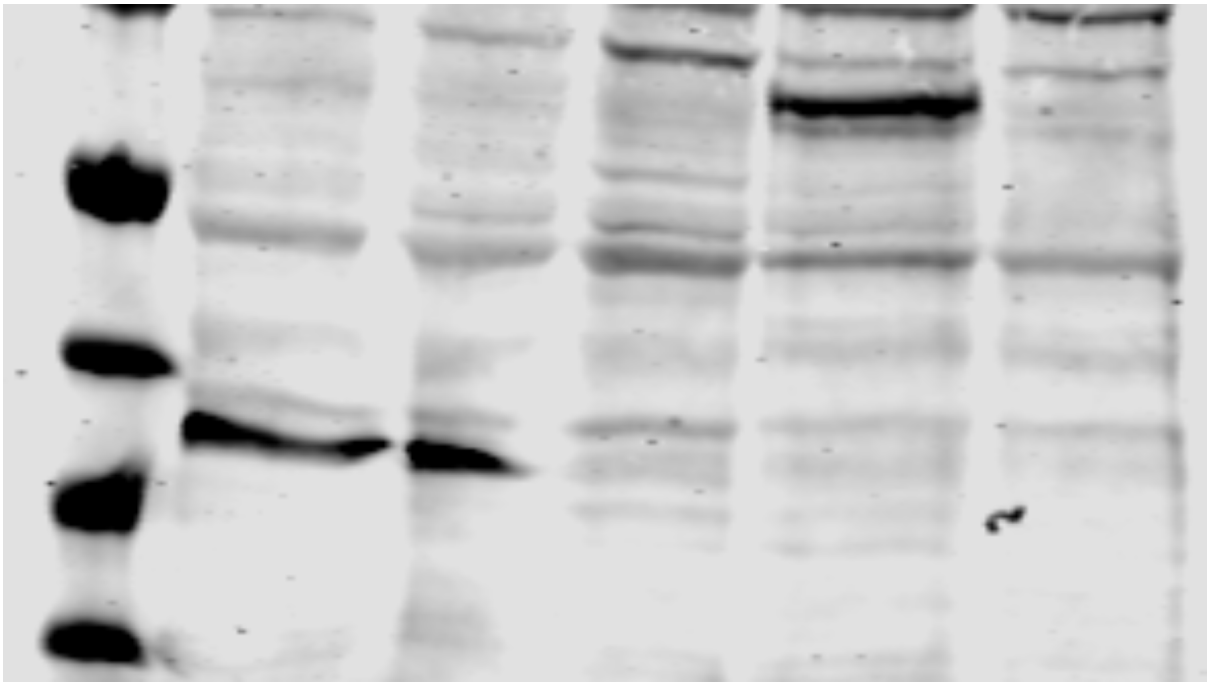

CYRI-B

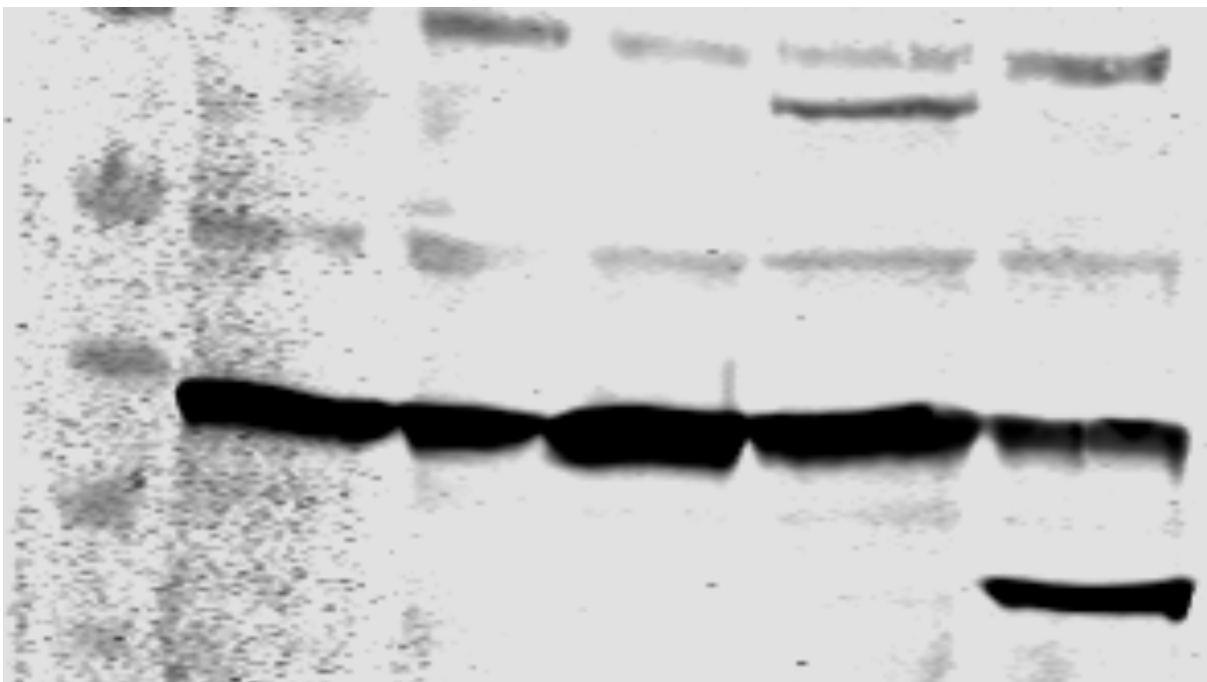

GFP and GAPDH

Supplement: fig4-figsupp2-data1 [file elife-83712-fig4-figsupp2-data1-v2.zip]

Figure 4- figure supplement 2A

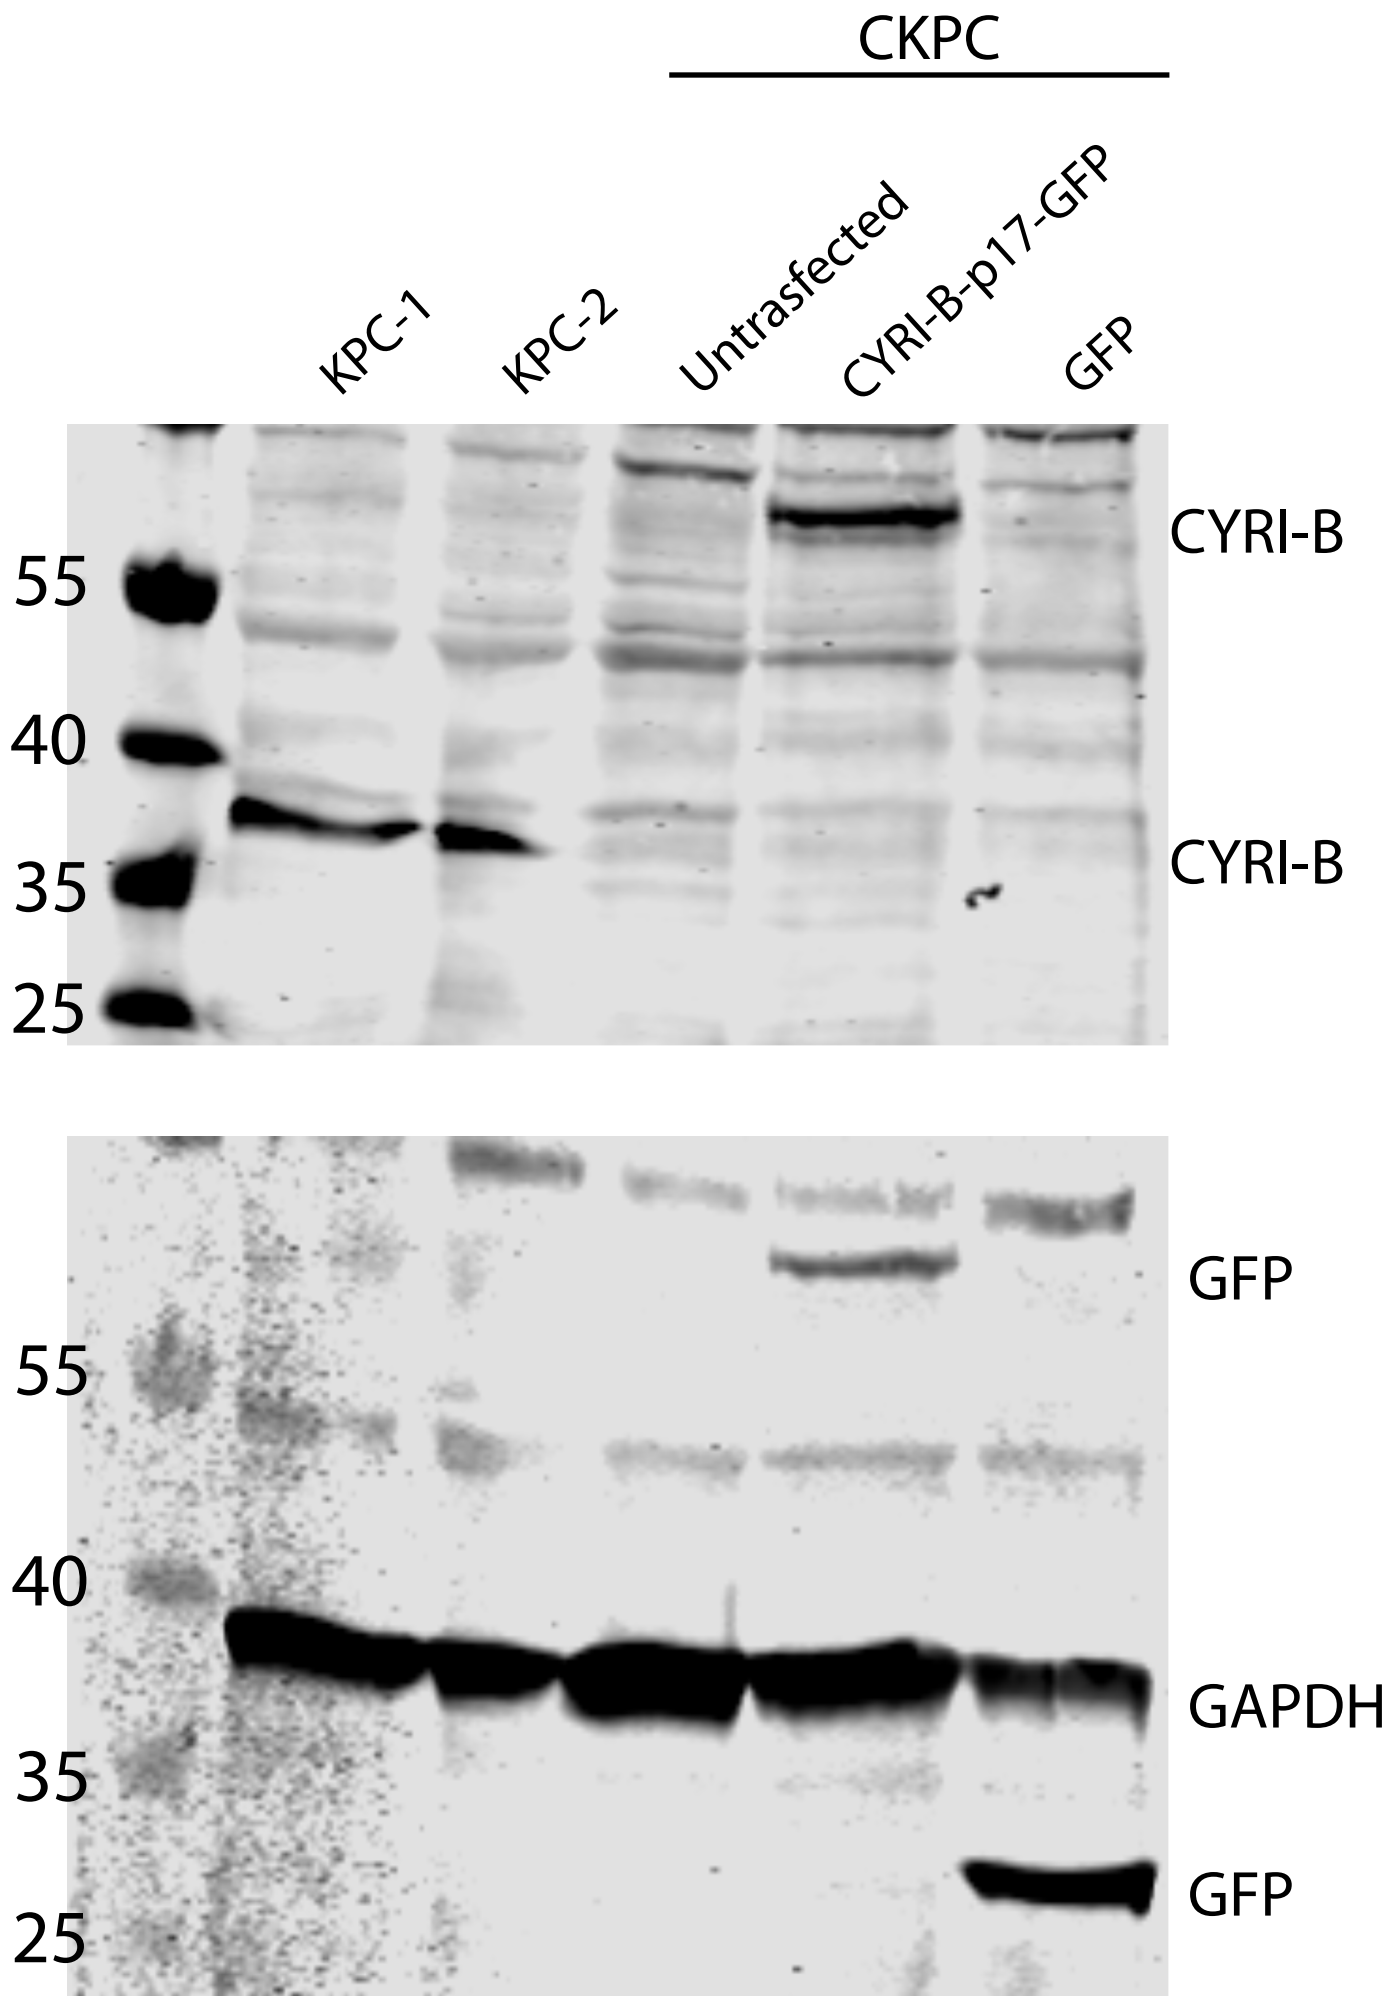

Supplement: fig4-figsupp2-data1 [file elife-83712-fig4-figsupp2-data1-v2.zip]
